# Supplementary material for: Cell type-specific network analysis in Diversity Outbred mice identifies genes potentially responsible for human bone mineral density GWAS associations
Source: bioRxiv preprint, doi:10.1101/2024.05.20.594981, version 4 (2026-02-08)
Supplement: Supplementary_File_1 [file 594981_file02.xlsx]

## Sheet: Supplementary File 1a
Gene	p_val	avg_log2FC	pct.1	pct.2	p_val_adj	Cell_cluster
Igkc	0	2.8176	0.979	0.219	0	BC
Ighm	0	2.72058	0.932	0.112	0	BC
Jchain	0	2.50309	0.985	0.029	0	BC
Iglc2	0	2.16136	0.99	0.018	0	BC
Cd74	0	1.96254	0.996	0.071	0	BC
Mzb1	0	1.94966	0.988	0.003	0	BC
Ly6d	0	1.79982	0.934	0.002	0	BC
Iglc1	0	1.562	0.834	0.035	0	BC
Iglc3	0	1.32492	0.888	0.001	0	BC
Iglv1	0	1.22163	0.641	0.001	0	BC
Ly6c2	0	1.20499	0.672	0.022	0	BC
Cd52	0	1.1431	0.834	0.104	0	BC
Cd79a	0	1.04278	0.795	0.006	0	BC
Fam46c	0	1.00212	0.942	0.319	0	BC
Epcam	0	0.948297	0.739	0.004	0	BC
Derl3	0	0.942837	0.776	0.02	0	BC
Chchd10	0	0.932831	0.807	0.108	0	BC
Cd69	0	0.859767	0.651	0.031	0	BC
Cacna1s	0	0.847913	0.712	0.002	0	BC
Edem2	0	0.825746	0.828	0.191	0	BC
Eaf2	0	0.771284	0.651	0.018	0	BC
Pou2af1	0	0.752555	0.67	0	0	BC
Tnfrsf13b	0	0.730548	0.71	0.02	0	BC
Cd79b	0	0.725409	0.678	0.003	0	BC
Spint2	0	0.696848	0.689	0.032	0	BC
Cytip	0	0.693775	0.699	0.043	0	BC
Tspan13	0	0.678009	0.726	0.113	0	BC
Slamf9	0	0.649093	0.589	0.015	0	BC
Igkv20-101-2	0	0.639299	0.282	0.001	0	BC
Iglv3	0	0.639083	0.442	0	0	BC
Oosp1	0	0.585269	0.539	0.001	0	BC
Slamf7	0	0.551308	0.606	0.039	0	BC
Cldn7	0	0.539743	0.444	0.002	0	BC
Chst1	0	0.535411	0.473	0.017	0	BC
Irf4	0	0.509405	0.485	0.01	0	BC
Tnfrsf13c	0	0.491875	0.479	0.001	0	BC
Ighv5-2	0	0.488805	0.268	0	0	BC
Wnt10a	0	0.474838	0.452	0.002	0	BC
Prg2	0	0.473108	0.409	0.001	0	BC
Tnfrsf17	0	0.432101	0.39	0.001	0	BC
Cyp4f18	0	0.411053	0.315	0.016	0	BC
Rnase6	0	0.356425	0.349	0.003	0	BC
Zbp1	0	0.348364	0.405	0.037	0	BC
Prlr	0	0.330595	0.355	0.002	0	BC
Lax1	0	0.316977	0.34	0.021	0	BC
Mef2b	0	0.300614	0.317	0.006	0	BC
Rhoh	0	0.298173	0.311	0.015	0	BC
Cmah	0	0.283383	0.317	0.006	0	BC
Ptprcap	0	0.280988	0.253	0.008	0	BC
Sec11c	3.78e-305	1.06494	0.985	0.561	8.26e-301	BC
Creld2	3.48e-303	1.03312	0.898	0.32	7.6e-299	BC
Herpud1	4.4e-302	1.1286	0.992	0.695	9.6e-298	BC
Entpd1	3.56e-300	0.288201	0.369	0.038	7.78e-296	BC
Itga4	6.96e-300	0.42289	0.502	0.07	1.52e-295	BC
Ero1lb	9.56e-298	0.301492	0.336	0.033	2.09e-293	BC
Fam214a	2.52e-289	0.89992	0.89	0.294	5.51e-285	BC
H2-Eb1	6.38e-287	0.317421	0.346	0.036	1.39e-282	BC
Pik3cg	2.89e-274	0.287022	0.371	0.041	6.31e-270	BC
Sdf2l1	6.57e-270	0.802048	0.803	0.232	1.43e-265	BC
Sel1l	7.62e-256	0.980827	0.915	0.426	1.66e-251	BC
Blnk	2.64e-235	0.438279	0.583	0.103	5.76e-231	BC
Ly6a	1.02e-232	0.864074	0.687	0.175	2.23e-228	BC
Txndc5	8.14e-226	0.914577	0.961	0.632	1.78e-221	BC
Fkbp2	1.29e-223	0.798449	0.967	0.595	2.81e-219	BC
Eif2ak3	2.9e-216	0.516026	0.627	0.159	6.33e-212	BC
Cd24a	6.01e-208	0.550857	0.651	0.157	1.31e-203	BC
Ssr4	6.77e-207	0.53523	0.992	0.851	1.48e-202	BC
Srgn	1.16e-203	0.804365	0.94	0.318	2.54e-199	BC
Slc3a2	3.2e-191	0.73889	0.967	0.774	6.99e-187	BC
Serp1	3.27e-188	0.61646	0.975	0.779	7.13e-184	BC
Xbp1	2.02e-182	0.752925	0.944	0.68	4.4e-178	BC
Spcs2	3.01e-181	0.561745	0.988	0.769	6.58e-177	BC
Ltb	1.02e-171	0.301371	0.218	0.023	2.22e-167	BC
Pdia4	4.74e-164	0.718154	0.871	0.493	1.04e-159	BC
Ly6e	4.29e-161	0.74268	0.95	0.541	9.36e-157	BC
Rexo2	9.96e-158	0.610734	0.95	0.691	2.17e-153	BC
Fam107b	4.69e-148	0.375315	0.552	0.14	1.02e-143	BC
Stard5	7.28e-146	0.358752	0.475	0.118	1.59e-141	BC
Slc7a5	5.5e-139	0.535409	0.695	0.276	1.2e-134	BC
Sub1	2.42e-138	0.488405	0.956	0.808	5.28e-134	BC
Lmo2	2.27e-137	0.303645	0.444	0.094	4.96e-133	BC
Manf	8.6e-135	0.595492	0.95	0.754	1.88e-130	BC
Spcs3	1.3e-131	0.548846	0.747	0.353	2.84e-127	BC
Bcl2	8.9e-131	0.385666	0.479	0.13	1.94e-126	BC
Ctss	5.33e-126	0.53443	0.921	0.311	1.16e-121	BC
Edem1	1.97e-122	0.582892	0.861	0.548	4.3e-118	BC
H13	3.59e-118	0.4829	0.959	0.706	7.83e-114	BC
Ubald2	2.78e-115	0.564874	0.82	0.468	6.06e-111	BC
Cxcl10	1.38e-113	0.311963	0.245	0.04	3.01e-109	BC
Hid1	4.42e-110	0.265326	0.34	0.078	9.66e-106	BC
Sft2d2	5.33e-108	0.267266	0.392	0.096	1.16e-103	BC
Nfkbie	1.21e-107	0.274496	0.386	0.093	2.64e-103	BC
Trp53inp1	8.32e-107	0.507861	0.743	0.348	1.82e-102	BC
Sp140	3.61e-106	0.25529	0.405	0.101	7.87e-102	BC
Phgdh	7e-106	0.514473	0.793	0.412	1.53e-101	BC
Rac2	4.43e-103	0.269226	0.485	0.126	9.67e-99	BC
Slc25a19	2.21e-100	0.266742	0.322	0.075	4.83e-96	BC
Rap1a	2.77e-100	0.477833	0.867	0.583	6.05e-96	BC
Trabd	6.32e-100	0.51467	0.674	0.337	1.38e-95	BC
Dusp4	2.29e-97	0.268278	0.315	0.071	5.01e-93	BC
Pim1	7.44e-96	0.554635	0.9	0.572	1.62e-91	BC
Hsp90b1	3.17e-93	0.420042	0.983	0.871	6.92e-89	BC
Man1a	4.99e-92	0.345011	0.585	0.211	1.09e-87	BC
Evi2a	3.88e-90	0.312224	0.467	0.147	8.47e-86	BC
Pon3	1.05e-89	0.440911	0.477	0.178	2.3e-85	BC
Jund	3.71e-85	0.364645	0.973	0.862	8.09e-81	BC
Dnajc3	6.04e-81	0.441465	0.876	0.64	1.32e-76	BC
Rpl36al	9.05e-79	0.322365	0.973	0.852	1.98e-74	BC
Tex30	4.15e-78	0.274039	0.419	0.143	9.07e-74	BC
Dnajb11	4.19e-78	0.438495	0.788	0.526	9.15e-74	BC
Cyba	4.81e-78	0.447566	0.961	0.782	1.05e-73	BC
Ccrl2	7.65e-78	0.340906	0.67	0.241	1.67e-73	BC
Odc1	4.45e-77	0.441821	0.876	0.627	9.71e-73	BC
Pdia6	2.84e-76	0.418366	0.921	0.721	6.19e-72	BC
1700017B05Rik	2.78e-75	0.337122	0.608	0.259	6.08e-71	BC
Cyfip2	1.34e-74	0.252686	0.4	0.125	2.92e-70	BC
Syvn1	5.76e-74	0.355619	0.531	0.234	1.26e-69	BC
Clptm1l	7.2e-72	0.390905	0.842	0.601	1.57e-67	BC
Derl1	3.53e-71	0.400172	0.888	0.655	7.7e-67	BC
Txndc11	8.03e-71	0.354681	0.546	0.257	1.75e-66	BC
Icam1	2.34e-69	0.278069	0.467	0.16	5.11e-65	BC
Tor2a	3.78e-67	0.308132	0.541	0.246	8.25e-63	BC
Selenok	5.12e-67	0.30162	0.959	0.857	1.12e-62	BC
Arid3a	5.66e-67	0.272613	0.402	0.143	1.24e-62	BC
Zfp706	2.32e-63	0.357334	0.878	0.666	5.07e-59	BC
Rilpl2	1.99e-61	0.33189	0.683	0.362	4.35e-57	BC
Dusp14	2.83e-60	0.294658	0.359	0.13	6.18e-56	BC
H2-Ab1	8.96e-59	0.309319	0.515	0.224	1.96e-54	BC
Mt2	6.09e-58	0.604945	0.649	0.394	1.33e-53	BC
Msi2	5.12e-57	0.312467	0.624	0.339	1.12e-52	BC
H2-T23	2.77e-55	0.333578	0.691	0.397	6.05e-51	BC
Dusp5	5.43e-55	0.316197	0.51	0.231	1.19e-50	BC
Hspa5	7.1e-55	0.32126	0.988	0.927	1.55e-50	BC
Sec61b	2.31e-54	0.285301	0.961	0.847	5.04e-50	BC
Prdx4	1.08e-53	0.34707	0.882	0.701	2.36e-49	BC
Hyou1	1.13e-53	0.31822	0.475	0.222	2.47e-49	BC
Kdm2b	2.72e-53	0.26526	0.357	0.136	5.94e-49	BC
Slpi	4.69e-51	0.733682	0.448	0.213	1.02e-46	BC
Pon2	4.65e-50	0.270795	0.541	0.274	1.01e-45	BC
Mrpl57	2.03e-49	0.313977	0.865	0.647	4.44e-45	BC
Psmb8	2.4e-49	0.354625	0.753	0.497	5.24e-45	BC
Trib1	4.76e-49	0.256749	0.556	0.259	1.04e-44	BC
Cbx4	1.99e-47	0.292054	0.49	0.252	4.34e-43	BC
Isg20	8.17e-47	0.296225	0.448	0.221	1.78e-42	BC
Ighg3	6.74e-46	0.74065	0.162	0.039	1.47e-41	BC
Ndufa1	1.08e-45	0.302764	0.894	0.73	2.36e-41	BC
D10Wsu102e	1.59e-45	0.307227	0.554	0.299	3.46e-41	BC
Nucb1	2.37e-42	0.30601	0.78	0.575	5.18e-38	BC
Uba5	1.18e-41	0.332547	0.656	0.453	2.57e-37	BC
Sdc1	8.74e-41	0.257089	0.579	0.318	1.91e-36	BC
Myl12b	1.93e-40	0.276433	0.793	0.567	4.21e-36	BC
Tmem248	2.91e-40	0.285701	0.691	0.47	6.35e-36	BC
Lman2	4.06e-40	0.282531	0.824	0.631	8.86e-36	BC
Larp1b	4.96e-39	0.251486	0.498	0.27	1.08e-34	BC
Mettl1	2.99e-38	0.275493	0.544	0.324	6.52e-34	BC
Chac1	7.36e-38	0.271797	0.382	0.175	1.61e-33	BC
Dnajb9	2.92e-37	0.326847	0.79	0.584	6.38e-33	BC
Ube2j1	1.3e-36	0.275497	0.741	0.551	2.85e-32	BC
Pafah1b3	1.1e-33	0.277733	0.627	0.424	2.41e-29	BC
Syngr2	3.21e-33	0.264694	0.651	0.444	7.01e-29	BC
Ssbp1	1.09e-32	0.284525	0.61	0.418	2.37e-28	BC
Cdk2ap2	8.92e-32	0.277326	0.647	0.46	1.95e-27	BC
Srpr	9.36e-32	0.276619	0.784	0.611	2.04e-27	BC
Mt1	6.94e-19	0.309483	0.832	0.812	1.52e-14	BC
Col18a1	0	1.52895	0.907	0.08	0	EC
Apod	0	1.4537	0.577	0.011	0	EC
Uchl1	0	1.18358	0.747	0.015	0	EC
Nes	0	1.15619	0.838	0.068	0	EC
Ngfr	0	1.10855	0.574	0.001	0	EC
Plp1	0	1.07841	0.553	0.012	0	EC
Gap43	0	0.903678	0.516	0.001	0	EC
Cdh19	0	0.897643	0.535	0.001	0	EC
Cdh5	0	0.87743	0.367	0.001	0	EC
Pcdh20	0	0.867712	0.46	0.022	0	EC
Klk8	0	0.841253	0.447	0.004	0	EC
Foxd3	0	0.839865	0.529	0	0	EC
Tubb2b	0	0.839825	0.62	0.027	0	EC
Mcam	0	0.831214	0.63	0.054	0	EC
Emcn	0	0.813029	0.367	0.003	0	EC
Btc	0	0.810042	0.497	0.004	0	EC
Fam19a5	0	0.792541	0.513	0.04	0	EC
Gldn	0	0.776861	0.452	0.009	0	EC
Edn1	0	0.770689	0.383	0.033	0	EC
Ecscr	0	0.765997	0.367	0.02	0	EC
Slitrk6	0	0.721167	0.46	0.032	0	EC
Esam	0	0.71374	0.364	0.003	0	EC
Tenm3	0	0.711201	0.471	0.001	0	EC
Kcna1	0	0.711117	0.41	0	0	EC
Adgrl3	0	0.700168	0.471	0.006	0	EC
Upp1	0	0.685682	0.42	0.014	0	EC
Myct1	0	0.68409	0.356	0.001	0	EC
Itga7	0	0.656843	0.46	0.049	0	EC
Pxdn	0	0.653228	0.606	0.046	0	EC
Itga6	0	0.636754	0.598	0.044	0	EC
Sox10	0	0.631185	0.412	0	0	EC
Cadm4	0	0.627182	0.407	0.01	0	EC
Itgb8	0	0.624686	0.41	0.02	0	EC
Chl1	0	0.622026	0.396	0.007	0	EC
Sema4f	0	0.61797	0.449	0.04	0	EC
Tnik	0	0.61678	0.463	0.046	0	EC
Fgf5	0	0.597721	0.364	0	0	EC
Sox2	0	0.596926	0.372	0	0	EC
Plekhg1	0	0.585783	0.545	0.063	0	EC
Lims2	0	0.585047	0.537	0.059	0	EC
Arhgef26	0	0.580012	0.471	0.038	0	EC
Pcdh1	0	0.572984	0.535	0.049	0	EC
Sdcbp2	0	0.56726	0.348	0.014	0	EC
Plvap	0	0.549484	0.29	0.016	0	EC
Zfp536	0	0.535459	0.375	0	0	EC
Erbb3	0	0.519581	0.372	0.003	0	EC
Luzp2	0	0.518956	0.38	0.001	0	EC
Hcn1	0	0.518851	0.348	0	0	EC
Rasip1	0	0.518746	0.335	0.005	0	EC
Sema3e	0	0.514121	0.354	0.011	0	EC
L1cam	0	0.509671	0.388	0.023	0	EC
Icam2	0	0.506609	0.346	0.008	0	EC
Trp53i11	0	0.504187	0.301	0.017	0	EC
Adgrl4	0	0.504088	0.33	0.006	0	EC
F11r	0	0.502349	0.351	0.013	0	EC
Ltbp4	0	0.500817	0.396	0.026	0	EC
Adgrg1	0	0.497247	0.473	0.008	0	EC
Cldn5	0	0.463359	0.247	0.001	0	EC
Cd34	0	0.451417	0.295	0.006	0	EC
Tfap2a	0	0.4491	0.346	0.002	0	EC
Ttc9	0	0.445075	0.38	0.006	0	EC
Gm12688	0	0.440413	0.314	0	0	EC
Mmrn2	0	0.439066	0.316	0.004	0	EC
Afap1l1	0	0.437206	0.34	0.004	0	EC
Tspan15	0	0.422661	0.359	0.005	0	EC
N4bp3	0	0.421975	0.301	0.014	0	EC
Dmd	0	0.418102	0.348	0.006	0	EC
Hoxb7	0	0.411975	0.431	0.006	0	EC
Epha5	0	0.409167	0.255	0.001	0	EC
Rasgrp3	0	0.395777	0.306	0.014	0	EC
Lgi4	0	0.394427	0.266	0.012	0	EC
Itga3	0	0.394033	0.343	0.017	0	EC
Col14a1	0	0.389865	0.21	0.002	0	EC
Fam178b	0	0.37552	0.218	0.003	0	EC
Egfl8	0	0.374063	0.274	0.007	0	EC
Gpihbp1	0	0.373048	0.154	0	0	EC
Arap3	0	0.355798	0.372	0.015	0	EC
Robo4	0	0.344235	0.274	0	0	EC
Sox13	0	0.34313	0.343	0.014	0	EC
Gfra1	0	0.332084	0.261	0.001	0	EC
Tspan2	0	0.331949	0.327	0.012	0	EC
Notch4	0	0.330461	0.314	0.009	0	EC
Dll4	0	0.330439	0.25	0.001	0	EC
Itgb4	0	0.321444	0.279	0.007	0	EC
Gimap4	0	0.312726	0.213	0.003	0	EC
Lmo1	0	0.312623	0.306	0.02	0	EC
Kdr	0	0.312394	0.231	0.006	0	EC
Nrarp	0	0.308011	0.29	0.015	0	EC
Flt1	0	0.307533	0.253	0.005	0	EC
Pcdh17	0	0.305512	0.253	0.005	0	EC
Gfra3	0	0.305329	0.178	0	0	EC
Gfra2	0	0.30323	0.242	0.005	0	EC
Sox17	0	0.300925	0.245	0	0	EC
Bcl6b	0	0.294904	0.279	0.002	0	EC
Gfap	0	0.29398	0.176	0	0	EC
Moxd1	0	0.293788	0.215	0.001	0	EC
Mfng	0	0.291149	0.261	0.008	0	EC
Prex2	0	0.290284	0.277	0.003	0	EC
Ntm	0	0.2819	0.191	0	0	EC
Sema3f	0	0.275924	0.263	0.008	0	EC
Cnksr2	0	0.269205	0.21	0	0	EC
Kcna6	0	0.266458	0.202	0	0	EC
Reln	0	0.264681	0.194	0	0	EC
Mecom	0	0.263321	0.234	0.001	0	EC
Greb1	0	0.258628	0.218	0.011	0	EC
Kcne3	0	0.255816	0.138	0.002	0	EC
Gimap5	0	0.253515	0.245	0.006	0	EC
Ptprb	0	0.251622	0.242	0.001	0	EC
Tmem158	1.23e-304	0.784983	0.447	0.048	2.68e-300	EC
Gas7	1.4e-298	0.598942	0.588	0.076	3.06e-294	EC
Shisa2	1.24e-278	0.289743	0.194	0.01	2.72e-274	EC
Gimap6	7.21e-276	0.420966	0.319	0.026	1.57e-271	EC
Pdgfb	2.54e-271	0.636528	0.497	0.062	5.55e-267	EC
Dok4	7.01e-259	0.569957	0.404	0.045	1.53e-254	EC
Gdnf	1.49e-258	0.565774	0.412	0.047	3.26e-254	EC
Ets1	2.59e-251	0.889332	0.851	0.234	5.66e-247	EC
Map1b	3.63e-249	0.8407	0.824	0.21	7.93e-245	EC
Chst1	1.24e-227	0.260681	0.239	0.018	2.7e-223	EC
Egfl7	1.58e-225	0.912589	0.42	0.057	3.45e-221	EC
Oaf	4.2e-225	0.843492	0.723	0.176	9.17e-221	EC
Col4a1	5.39e-220	1.02783	0.793	0.215	1.18e-215	EC
Ank3	6.39e-218	1.01413	0.564	0.109	1.4e-213	EC
Tm4sf1	1.25e-214	1.21705	0.891	0.37	2.72e-210	EC
Ramp2	3.03e-214	0.356268	0.266	0.023	6.62e-210	EC
Mlph	1.76e-213	0.324048	0.274	0.025	3.85e-209	EC
Igfbp3	1.08e-211	0.731554	0.561	0.093	2.35e-207	EC
Tgfbi	1.93e-208	0.801629	0.543	0.093	4.22e-204	EC
Tinagl1	2.25e-208	0.450258	0.316	0.034	4.92e-204	EC
Col4a2	2.29e-206	0.840941	0.697	0.172	4.99e-202	EC
Cd151	2.52e-206	0.80185	0.846	0.283	5.51e-202	EC
Sparcl1	3.22e-203	0.27879	0.221	0.017	7.03e-199	EC
Nid1	6.08e-200	0.636886	0.652	0.142	1.33e-195	EC
Adamtsl1	5.67e-197	0.609202	0.412	0.061	1.24e-192	EC
Sox6	3.05e-196	0.373305	0.287	0.029	6.65e-192	EC
Cracr2b	9.14e-192	0.289285	0.298	0.031	1.99e-187	EC
Grap	1.89e-191	0.313943	0.277	0.027	4.12e-187	EC
Plxnd1	1.32e-188	0.797734	0.785	0.228	2.88e-184	EC
8430408G22Rik	6.31e-188	0.434604	0.231	0.02	1.38e-183	EC
Mmp17	3.35e-184	0.368641	0.287	0.031	7.31e-180	EC
Plxna4	2.13e-178	0.277123	0.263	0.027	4.64e-174	EC
Pgf	3.31e-178	0.878589	0.516	0.104	7.22e-174	EC
Efnb2	3.9e-178	0.52844	0.449	0.077	8.52e-174	EC
Pdlim1	3.69e-171	0.671341	0.723	0.212	8.06e-167	EC
AA467197	7.34e-169	0.53373	0.338	0.044	1.6e-164	EC
Jcad	5.37e-168	0.543211	0.532	0.115	1.17e-163	EC
Sox4	2.17e-166	0.880918	0.947	0.501	4.74e-162	EC
Edil3	4.25e-165	0.781191	0.548	0.128	9.29e-161	EC
Nr2f1	4.43e-165	0.309499	0.295	0.036	9.68e-161	EC
Sptbn1	2.05e-161	0.827411	0.939	0.533	4.47e-157	EC
Entpd2	2.58e-161	0.421067	0.306	0.04	5.63e-157	EC
Map6	3.79e-158	0.321597	0.306	0.04	8.28e-154	EC
Atp8b1	2.7e-155	0.285153	0.316	0.043	5.91e-151	EC
Nkd2	4.13e-154	0.747541	0.535	0.13	9.01e-150	EC
Dst	6.78e-153	0.777109	0.918	0.502	1.48e-148	EC
Pea15a	4.87e-150	0.655995	0.755	0.246	1.06e-145	EC
Tagln2	7.07e-150	0.798396	0.968	0.601	1.54e-145	EC
Csmd1	9.99e-150	0.350953	0.277	0.034	2.18e-145	EC
Nrcam	1.46e-149	0.5155	0.404	0.074	3.18e-145	EC
Mest	4.44e-149	0.455816	0.324	0.046	9.7e-145	EC
Dbn1	4.24e-147	0.574251	0.644	0.192	9.26e-143	EC
Cyp2j6	1.59e-145	0.519648	0.503	0.113	3.47e-141	EC
Actn4	4.71e-145	0.663807	0.984	0.687	1.03e-140	EC
Procr	1.36e-143	0.311845	0.301	0.041	2.97e-139	EC
Akap12	1.37e-143	0.682243	0.582	0.153	2.98e-139	EC
Endod1	1.73e-143	0.440494	0.492	0.107	3.79e-139	EC
Pxn	6.64e-143	0.496902	0.606	0.157	1.45e-138	EC
Tppp3	1.28e-142	0.315137	0.229	0.025	2.79e-138	EC
Lpar6	1.3e-142	0.32634	0.37	0.061	2.84e-138	EC
Vim	1.29e-141	0.475881	1	0.96	2.81e-137	EC
Rnd1	5.51e-141	0.383503	0.279	0.037	1.2e-136	EC
Jag1	1.75e-140	0.760307	0.657	0.206	3.81e-136	EC
Lrrc8c	1.76e-140	0.479837	0.505	0.116	3.84e-136	EC
Ppp1r2	4.01e-140	0.703814	0.934	0.58	8.75e-136	EC
Gatm	4.47e-136	0.391702	0.38	0.064	9.77e-132	EC
Flrt3	1.4e-134	0.277118	0.231	0.026	3.06e-130	EC
Rhoc	8.09e-134	0.677801	0.952	0.721	1.77e-129	EC
Gadd45a	1.18e-133	0.662874	0.729	0.249	2.57e-129	EC
Tspo	1.72e-133	0.659847	0.963	0.755	3.75e-129	EC
Bdnf	5.14e-131	0.266979	0.21	0.023	1.12e-126	EC
Sema3c	4.31e-130	0.26149	0.229	0.027	9.42e-126	EC
Mgat4b	1.08e-129	0.626745	0.753	0.299	2.35e-125	EC
Pmepa1	1.46e-127	0.757975	0.941	0.646	3.18e-123	EC
Ppp1r13b	2.41e-127	0.351935	0.38	0.072	5.27e-123	EC
Hbegf	1.43e-126	0.678343	0.681	0.237	3.12e-122	EC
Gnb4	1.47e-126	0.537048	0.628	0.19	3.21e-122	EC
Cav2	1.67e-126	0.567977	0.511	0.131	3.64e-122	EC
Axl	2.3e-126	0.763811	0.548	0.161	5.01e-122	EC
Rgs8	2.37e-125	0.298704	0.21	0.024	5.18e-121	EC
Igfbp7	4.96e-124	0.85347	0.92	0.588	1.08e-119	EC
Tcf4	6.16e-123	0.736501	0.902	0.6	1.35e-118	EC
Gpm6b	1.7e-122	0.738802	0.519	0.139	3.72e-118	EC
Slc22a23	2.26e-120	0.380234	0.351	0.067	4.93e-116	EC
Prss23	3.89e-120	0.911019	0.718	0.288	8.49e-116	EC
Tmsb4x	2.23e-119	0.501903	1	0.972	4.87e-115	EC
Pecam1	7.83e-119	0.713883	0.372	0.078	1.71e-114	EC
Gnai2	1.05e-118	0.440267	0.989	0.888	2.28e-114	EC
Fkbp1a	7.64e-118	0.553987	0.968	0.819	1.67e-113	EC
Msn	1.09e-116	0.571435	0.965	0.754	2.37e-112	EC
Crip2	2.14e-112	0.662468	0.91	0.557	4.68e-108	EC
Itgb3	2.37e-112	0.376055	0.314	0.055	5.18e-108	EC
Cav1	1.72e-110	0.829928	0.508	0.146	3.76e-106	EC
Nudt4	2.5e-110	0.664206	0.894	0.525	5.46e-106	EC
Hspg2	9.94e-110	0.643933	0.867	0.496	2.17e-105	EC
Lrrc8b	1.34e-109	0.266225	0.311	0.054	2.92e-105	EC
Cpne8	2.32e-109	0.467498	0.524	0.151	5.07e-105	EC
2200002D01Rik	6.13e-109	0.364274	0.386	0.082	1.34e-104	EC
Atp1b1	1.51e-108	0.31049	0.184	0.021	3.3e-104	EC
Apbb2	4.46e-108	0.586378	0.801	0.394	9.73e-104	EC
Kank3	4.45e-107	0.285122	0.274	0.044	9.71e-103	EC
Ywhae	2.2e-106	0.398202	0.981	0.858	4.81e-102	EC
Cttnbp2nl	6.76e-106	0.479107	0.601	0.197	1.48e-101	EC
Tnfrsf12a	8.72e-106	0.654833	0.84	0.433	1.9e-101	EC
Anxa2	4.69e-105	0.424721	0.987	0.892	1.02e-100	EC
Hmga2	1.69e-103	0.42603	0.487	0.123	3.68e-99	EC
Cyb5r3	1.98e-103	0.572017	0.923	0.668	4.33e-99	EC
Arpc1b	2.17e-103	0.501398	0.979	0.834	4.75e-99	EC
Gab1	9.65e-103	0.506561	0.457	0.123	2.11e-98	EC
Ptma	2.11e-102	0.300589	1	0.957	4.62e-98	EC
Ctnna1	5.97e-101	0.556273	0.856	0.547	1.3e-96	EC
Rtn4	5.42e-100	0.502703	0.957	0.786	1.18e-95	EC
Cavin3	1.08e-99	0.633977	0.88	0.571	2.36e-95	EC
Fabp7	1.42e-99	0.381118	0.285	0.049	3.11e-95	EC
Ahnak2	2.49e-99	0.42664	0.516	0.146	5.43e-95	EC
Rras	4.91e-99	0.573605	0.835	0.435	1.07e-94	EC
Mfap3l	1.77e-98	0.27592	0.287	0.052	3.86e-94	EC
Hsp90ab1	6.94e-98	0.291948	0.997	0.945	1.52e-93	EC
Plekha1	1.26e-97	0.593212	0.657	0.271	2.76e-93	EC
Cnp	5.51e-97	0.429721	0.473	0.136	1.2e-92	EC
Stard13	3.1e-95	0.482574	0.452	0.131	6.78e-91	EC
Dgka	1.65e-94	0.27936	0.269	0.048	3.59e-90	EC
Sntb1	5.03e-94	0.282563	0.229	0.035	1.1e-89	EC
Ldb2	1.87e-92	0.339972	0.316	0.066	4.08e-88	EC
Tuba1a	3.68e-92	0.646363	0.944	0.631	8.03e-88	EC
Cnn3	2.39e-90	0.547422	0.843	0.461	5.22e-86	EC
Agrn	3.09e-90	0.49882	0.463	0.143	6.75e-86	EC
Frmd4a	8.05e-90	0.454902	0.641	0.252	1.76e-85	EC
Arhgef7	7.92e-89	0.421411	0.519	0.172	1.73e-84	EC
Tes	9.57e-89	0.473388	0.644	0.247	2.09e-84	EC
Celf2	1.26e-88	0.581348	0.566	0.198	2.76e-84	EC
Acan	6.43e-88	0.408581	0.168	0.021	1.4e-83	EC
Sh3bp5	1.45e-87	0.494919	0.553	0.182	3.16e-83	EC
Col27a1	5.92e-87	0.33387	0.324	0.072	1.29e-82	EC
Prnp	9.74e-87	0.612104	0.83	0.522	2.13e-82	EC
Dync1i2	5.72e-86	0.499077	0.907	0.628	1.25e-81	EC
Ywhah	7.16e-86	0.543792	0.878	0.604	1.56e-81	EC
Tmod1	3.24e-85	0.256426	0.239	0.041	7.07e-81	EC
Plekho1	6.07e-85	0.670292	0.779	0.434	1.33e-80	EC
Cavin1	1.28e-84	0.55764	0.827	0.496	2.79e-80	EC
Lpcat2	2.65e-84	0.251926	0.25	0.045	5.79e-80	EC
Eng	4.39e-84	0.543502	0.532	0.198	9.58e-80	EC
Rgs16	1.43e-83	0.53941	0.582	0.217	3.12e-79	EC
Plec	8.94e-83	0.520942	0.931	0.608	1.95e-78	EC
Cfl1	1.33e-82	0.317415	0.992	0.929	2.89e-78	EC
Pdzrn3	1.48e-82	0.466127	0.396	0.114	3.22e-78	EC
Plk2	1.73e-81	0.548982	0.686	0.302	3.78e-77	EC
Stc2	2.13e-81	0.840819	0.59	0.26	4.65e-77	EC
S100a16	2.62e-81	0.584583	0.758	0.47	5.71e-77	EC
Nr2f2	6.28e-81	0.343129	0.378	0.1	1.37e-76	EC
Pcbp4	7.81e-81	0.50349	0.58	0.237	1.71e-76	EC
Arpc1a	2.25e-80	0.530735	0.832	0.544	4.9e-76	EC
Ppp1r14b	3.81e-80	0.452882	0.955	0.739	8.31e-76	EC
Clic1	4.04e-80	0.473427	0.926	0.772	8.83e-76	EC
Olfml2a	4.38e-80	0.354691	0.306	0.068	9.56e-76	EC
Gnb1	2.76e-79	0.374545	0.957	0.832	6.02e-75	EC
Plpp1	2.97e-79	0.584614	0.713	0.354	6.47e-75	EC
Dpysl3	6.02e-79	0.572836	0.793	0.456	1.31e-74	EC
Itgb1	4.89e-78	0.40765	0.96	0.828	1.07e-73	EC
Ablim1	8.01e-78	0.343721	0.324	0.078	1.75e-73	EC
Akap13	5.88e-77	0.54487	0.795	0.449	1.28e-72	EC
Tpm4	2.89e-76	0.420955	0.963	0.777	6.31e-72	EC
Wwtr1	3.12e-76	0.505313	0.782	0.487	6.82e-72	EC
Set	4.23e-76	0.444563	0.915	0.734	9.24e-72	EC
4931406P16Rik	4.9e-76	0.451602	0.63	0.284	1.07e-71	EC
4930402H24Rik	2.95e-75	0.329654	0.452	0.144	6.44e-71	EC
Azin1	2.95e-75	0.576415	0.851	0.565	6.45e-71	EC
Tspan5	3.46e-75	0.26117	0.34	0.085	7.56e-71	EC
Csrp1	3.49e-74	0.56636	0.814	0.531	7.61e-70	EC
Tax1bp3	1.4e-73	0.480381	0.707	0.387	3.05e-69	EC
Eml1	1.4e-73	0.328042	0.38	0.11	3.06e-69	EC
Tmsb10	2.11e-73	0.366772	0.992	0.872	4.6e-69	EC
1700025G04Rik	3.07e-73	0.47689	0.54	0.216	6.7e-69	EC
Ctla2a	1.82e-72	1.07486	0.38	0.118	3.97e-68	EC
Ccdc102a	1.15e-71	0.281811	0.335	0.085	2.5e-67	EC
Il1rap	1.15e-71	0.270439	0.343	0.088	2.51e-67	EC
Syt11	2.08e-71	0.291557	0.351	0.094	4.53e-67	EC
Fbxo7	4.85e-71	0.343857	0.388	0.114	1.06e-66	EC
Capg	1.75e-69	0.505715	0.894	0.533	3.82e-65	EC
F2r	1.94e-69	0.361986	0.407	0.122	4.24e-65	EC
Map4	3.69e-69	0.484378	0.779	0.486	8.06e-65	EC
Zeb1	4.47e-69	0.402179	0.5	0.196	9.75e-65	EC
Gprc5b	9.3e-69	0.318621	0.404	0.127	2.03e-64	EC
Angpt2	1.23e-68	0.625022	0.364	0.11	2.69e-64	EC
Foxo1	1.47e-68	0.454224	0.678	0.342	3.21e-64	EC
Postn	2.15e-68	0.861105	0.62	0.317	4.69e-64	EC
Notch1	3.06e-68	0.429096	0.636	0.272	6.67e-64	EC
Selenof	3.72e-68	0.321509	0.968	0.84	8.12e-64	EC
Tnk2	4.71e-68	0.344786	0.394	0.123	1.03e-63	EC
Vwa1	3.68e-67	0.367496	0.391	0.118	8.04e-63	EC
Zbtb20	5.72e-67	0.491431	0.88	0.629	1.25e-62	EC
2023-09-07	6.51e-67	0.391482	0.902	0.728	1.42e-62	EC
Marcks	7.24e-66	0.508444	0.981	0.768	1.58e-61	EC
S100a10	8.38e-66	0.363829	0.979	0.858	1.83e-61	EC
Ubxn1	1.49e-65	0.382223	0.931	0.737	3.25e-61	EC
Plat	1.92e-65	0.259716	0.247	0.054	4.2e-61	EC
Sorbs1	1.93e-65	0.380935	0.407	0.132	4.22e-61	EC
Synpo	1.12e-64	0.297556	0.356	0.104	2.44e-60	EC
Kif5b	3.95e-64	0.412433	0.896	0.705	8.63e-60	EC
Nav2	9.53e-63	0.500812	0.548	0.237	2.08e-58	EC
Ngf	2.8e-61	0.311688	0.261	0.064	6.12e-57	EC
Smarcd1	4.33e-61	0.332982	0.473	0.181	9.45e-57	EC
Rcan2	1.41e-60	0.342779	0.303	0.083	3.09e-56	EC
Ktn1	2.95e-60	0.407328	0.769	0.471	6.45e-56	EC
Crlf1	4.29e-60	0.624395	0.532	0.25	9.36e-56	EC
Hdgf	2.58e-59	0.388405	0.894	0.676	5.63e-55	EC
Mapk3	3.48e-59	0.40544	0.84	0.584	7.6e-55	EC
Ppp1r18	3.85e-59	0.396847	0.665	0.339	8.41e-55	EC
Add1	4.14e-59	0.415552	0.707	0.402	9.05e-55	EC
Itga1	4.18e-59	0.496854	0.516	0.21	9.13e-55	EC
Apc	5.67e-59	0.424539	0.604	0.293	1.24e-54	EC
Hs2st1	8.05e-59	0.476635	0.604	0.308	1.76e-54	EC
Vat1	1.52e-58	0.41755	0.838	0.511	3.32e-54	EC
Fermt2	2.81e-58	0.432917	0.854	0.566	6.13e-54	EC
Mvp	2.91e-58	0.383153	0.596	0.276	6.35e-54	EC
Mob4	4.03e-58	0.406156	0.777	0.532	8.79e-54	EC
Raly	4.06e-58	0.38755	0.864	0.652	8.85e-54	EC
Cfl2	5.5e-58	0.413754	0.726	0.459	1.2e-53	EC
Dbi	7.13e-58	0.475044	0.944	0.809	1.56e-53	EC
Hnrnpa1	1.07e-57	0.368753	0.934	0.748	2.33e-53	EC
Smurf1	1.33e-57	0.311387	0.388	0.131	2.91e-53	EC
Acvrl1	1.43e-57	0.259192	0.348	0.105	3.13e-53	EC
Kif1b	1.67e-57	0.443418	0.758	0.463	3.64e-53	EC
Arhgap31	5.69e-57	0.422586	0.596	0.299	1.24e-52	EC
Edf1	1.76e-56	0.351889	0.947	0.785	3.85e-52	EC
Nckap1	2.8e-56	0.392967	0.71	0.436	6.11e-52	EC
Lmna	3.16e-56	0.338371	0.973	0.855	6.89e-52	EC
Rubcn	3.72e-56	0.277029	0.364	0.118	8.13e-52	EC
Gnpda2	8.12e-56	0.31287	0.447	0.172	1.77e-51	EC
Rdh5	4.22e-55	0.285943	0.205	0.045	9.22e-51	EC
Lama4	5.13e-55	0.378535	0.556	0.263	1.12e-50	EC
Jup	8.49e-55	0.255978	0.346	0.109	1.85e-50	EC
Creb5	9.14e-55	0.353897	0.497	0.192	1.99e-50	EC
Cttn	9.34e-55	0.405693	0.723	0.448	2.04e-50	EC
Dtna	1.12e-54	0.49665	0.479	0.217	2.45e-50	EC
Qk	1.25e-54	0.392286	0.912	0.712	2.73e-50	EC
Matn2	1.56e-54	0.411042	0.37	0.131	3.4e-50	EC
Col15a1	3.45e-54	0.495406	0.457	0.187	7.52e-50	EC
Ube2d3	4.59e-54	0.273563	0.968	0.882	1e-49	EC
Srpk2	5.43e-54	0.464077	0.689	0.405	1.18e-49	EC
Jpt1	1.01e-53	0.409226	0.838	0.579	2.21e-49	EC
Plxna2	1.07e-53	0.334342	0.553	0.221	2.35e-49	EC
Mapre1	1.42e-53	0.370373	0.859	0.655	3.1e-49	EC
Myo18a	1.44e-53	0.417976	0.553	0.271	3.14e-49	EC
Snrpe	1.88e-53	0.326053	0.926	0.782	4.11e-49	EC
Slc9a3r2	2.64e-53	0.399609	0.38	0.14	5.76e-49	EC
Tbcb	3.3e-53	0.385286	0.822	0.584	7.2e-49	EC
Tcim	3.32e-53	0.336412	0.399	0.141	7.24e-49	EC
Pdcd5	5.95e-53	0.362345	0.883	0.659	1.3e-48	EC
Gng2	9.56e-53	0.34344	0.566	0.233	2.09e-48	EC
2023-09-09	1.21e-52	0.391645	0.718	0.427	2.64e-48	EC
Arhgef40	1.33e-52	0.262854	0.367	0.124	2.9e-48	EC
Creb3l2	3.13e-52	0.441645	0.628	0.365	6.82e-48	EC
Il6st	3.26e-52	0.4955	0.702	0.433	7.13e-48	EC
Rhob	3.36e-52	0.460408	0.793	0.551	7.34e-48	EC
Capns1	4.4e-52	0.343844	0.923	0.772	9.62e-48	EC
Fez2	5.53e-52	0.436718	0.519	0.256	1.21e-47	EC
Ddx5	6.18e-52	0.253356	0.989	0.925	1.35e-47	EC
Anxa6	6.67e-52	0.422263	0.801	0.57	1.46e-47	EC
Ehd2	6.83e-52	0.445819	0.54	0.258	1.49e-47	EC
Hspb2	8.12e-52	0.505813	0.479	0.22	1.77e-47	EC
Dag1	9.82e-52	0.555902	0.726	0.505	2.14e-47	EC
Fzd4	1.65e-51	0.253775	0.287	0.08	3.6e-47	EC
Txndc17	4.04e-51	0.315321	0.915	0.779	8.81e-47	EC
Wnk1	4.62e-51	0.37252	0.904	0.695	1.01e-46	EC
Sptan1	1.23e-50	0.376759	0.707	0.436	2.7e-46	EC
Agap1	1.39e-50	0.328903	0.449	0.179	3.02e-46	EC
Serinc3	1.62e-50	0.350216	0.926	0.771	3.53e-46	EC
Scarb2	2.36e-50	0.48444	0.614	0.352	5.15e-46	EC
Frmd8	2.55e-50	0.338296	0.495	0.218	5.57e-46	EC
Arhgdia	3.04e-50	0.289348	0.965	0.862	6.64e-46	EC
Gnb2	3.55e-50	0.276389	0.96	0.854	7.74e-46	EC
Angptl2	4.52e-50	0.45605	0.396	0.159	9.86e-46	EC
Tubb2a	8.43e-50	0.430254	0.657	0.383	1.84e-45	EC
Serbp1	1.13e-49	0.282342	0.971	0.861	2.47e-45	EC
Ndfip1	1.26e-49	0.380043	0.729	0.468	2.75e-45	EC
4921524J17Rik	2.22e-49	0.384117	0.59	0.322	4.85e-45	EC
Ptbp3	2.76e-49	0.3808	0.835	0.573	6.03e-45	EC
Rock2	3.45e-49	0.378675	0.859	0.626	7.52e-45	EC
Trappc4	9.4e-49	0.355751	0.771	0.573	2.05e-44	EC
Foxp1	1.19e-48	0.401584	0.758	0.478	2.6e-44	EC
Ncor2	1.67e-48	0.368964	0.612	0.336	3.66e-44	EC
Rbp1	2.03e-48	0.478472	0.263	0.076	4.44e-44	EC
Pde4b	2.6e-48	0.37284	0.434	0.161	5.68e-44	EC
Anp32e	2.69e-48	0.463964	0.713	0.475	5.87e-44	EC
Cox5b	5.22e-48	0.315408	0.952	0.83	1.14e-43	EC
Txn1	5.65e-48	0.286247	0.973	0.884	1.23e-43	EC
Jun	6.39e-48	0.463124	0.888	0.649	1.4e-43	EC
Ybx3	7.6e-48	0.370657	0.83	0.64	1.66e-43	EC
Sema4c	9.8e-48	0.289336	0.301	0.096	2.14e-43	EC
Tjp1	1.08e-47	0.417947	0.577	0.338	2.35e-43	EC
Map2k1	1.18e-47	0.386688	0.699	0.449	2.58e-43	EC
Atf3	1.38e-47	0.483674	0.854	0.559	3.02e-43	EC
Sipa1l1	1.52e-47	0.359797	0.412	0.167	3.33e-43	EC
Lamc1	2.15e-47	0.305599	0.473	0.207	4.69e-43	EC
Sumo2	3.43e-47	0.285133	0.928	0.814	7.49e-43	EC
Kmt2a	5.6e-47	0.365225	0.614	0.34	1.22e-42	EC
Erf	1.24e-46	0.298187	0.383	0.146	2.71e-42	EC
Ywhaq	1.6e-46	0.310237	0.923	0.777	3.48e-42	EC
Dctn2	2.69e-46	0.35567	0.824	0.608	5.87e-42	EC
Arhgef12	3.62e-46	0.376038	0.702	0.462	7.91e-42	EC
Nfic	5.02e-46	0.37719	0.715	0.457	1.1e-41	EC
Svil	5.4e-46	0.273545	0.436	0.178	1.18e-41	EC
Asap2	6e-46	0.295071	0.431	0.182	1.31e-41	EC
Clic4	6.58e-46	0.353538	0.88	0.725	1.44e-41	EC
Ypel2	7.18e-46	0.271118	0.322	0.108	1.57e-41	EC
Mbp	7.28e-46	0.259276	0.213	0.052	1.59e-41	EC
Ppp1r11	1.41e-45	0.383832	0.705	0.496	3.09e-41	EC
Csnk1e	2.38e-45	0.348952	0.63	0.36	5.2e-41	EC
Rapgef1	3.21e-45	0.312211	0.511	0.245	7e-41	EC
Npdc1	5.03e-45	0.355418	0.777	0.532	1.1e-40	EC
Ptk2	1.45e-44	0.337406	0.508	0.251	3.16e-40	EC
Pdlim7	1.75e-44	0.367485	0.681	0.429	3.81e-40	EC
Fign	1.75e-44	0.371907	0.356	0.14	3.83e-40	EC
Elf1	2.39e-44	0.306045	0.566	0.278	5.21e-40	EC
Prmt1	2.4e-44	0.355822	0.755	0.499	5.25e-40	EC
Znrf1	3.04e-44	0.310524	0.54	0.264	6.64e-40	EC
Flnb	3.19e-44	0.394479	0.519	0.272	6.97e-40	EC
Tprgl	3.34e-44	0.386047	0.723	0.504	7.29e-40	EC
S100a6	4.79e-44	0.321549	0.995	0.92	1.05e-39	EC
Vdac3	7e-44	0.325019	0.864	0.686	1.53e-39	EC
Col16a1	8.63e-44	0.402691	0.391	0.17	1.88e-39	EC
Cwc15	8.75e-44	0.326916	0.822	0.643	1.91e-39	EC
Crim1	1.76e-43	0.508285	0.415	0.192	3.83e-39	EC
Orai1	2.39e-43	0.296247	0.463	0.207	5.22e-39	EC
Actr3	6.59e-43	0.306077	0.912	0.785	1.44e-38	EC
Myo6	8.95e-43	0.329469	0.532	0.277	1.95e-38	EC
Anxa7	9.31e-43	0.334445	0.782	0.541	2.03e-38	EC
Vwa5a	2.14e-42	0.32088	0.556	0.268	4.68e-38	EC
Pkig	4.97e-42	0.409719	0.606	0.392	1.08e-37	EC
Tmpo	6.07e-42	0.322072	0.537	0.263	1.33e-37	EC
Steap3	6.97e-42	0.326998	0.29	0.098	1.52e-37	EC
Flna	7.99e-42	0.361494	0.888	0.664	1.74e-37	EC
Git1	8.05e-42	0.259444	0.418	0.176	1.76e-37	EC
Fscn1	8.45e-42	0.46165	0.638	0.437	1.84e-37	EC
Mrfap1	8.77e-42	0.285899	0.968	0.833	1.91e-37	EC
Marcksl1	9.21e-42	0.330728	0.771	0.464	2.01e-37	EC
Usp22	1.27e-41	0.348506	0.63	0.377	2.78e-37	EC
Jak1	2.04e-41	0.385317	0.848	0.655	4.44e-37	EC
Ywhaz	2.83e-41	0.266548	0.936	0.818	6.18e-37	EC
Cryab	4.02e-41	0.717753	0.678	0.577	8.78e-37	EC
Eif5b	5.84e-41	0.331308	0.864	0.679	1.27e-36	EC
Pfdn1	9.02e-41	0.331652	0.795	0.614	1.97e-36	EC
Rhbdf1	1.4e-40	0.291823	0.415	0.183	3.06e-36	EC
Cct4	1.62e-40	0.300718	0.875	0.719	3.54e-36	EC
Utrn	1.74e-40	0.420166	0.697	0.475	3.81e-36	EC
Esf1	1.92e-40	0.364067	0.739	0.508	4.19e-36	EC
Ube2i	4.26e-40	0.290605	0.856	0.733	9.3e-36	EC
Clcn3	4.99e-40	0.281701	0.476	0.22	1.09e-35	EC
Gamt	5.78e-40	0.399012	0.463	0.227	1.26e-35	EC
Kctd17	7.84e-40	0.310567	0.513	0.269	1.71e-35	EC
Trio	8.17e-40	0.318896	0.572	0.308	1.78e-35	EC
Itgav	1.11e-39	0.362422	0.737	0.531	2.43e-35	EC
Sri	1.25e-39	0.343633	0.806	0.647	2.72e-35	EC
Tbca	3.71e-39	0.25893	0.918	0.803	8.11e-35	EC
Vdac2	4.21e-39	0.287091	0.883	0.786	9.19e-35	EC
Nedd4	8.04e-39	0.332891	0.96	0.73	1.75e-34	EC
Tgfb1i1	8.33e-39	0.316227	0.636	0.354	1.82e-34	EC
Tmem47	1.16e-38	0.394258	0.487	0.259	2.53e-34	EC
Ranbp1	1.82e-38	0.320248	0.872	0.679	3.97e-34	EC
Lamb1	2.61e-38	0.257027	0.391	0.162	5.7e-34	EC
Eif6	2.8e-38	0.325097	0.795	0.67	6.11e-34	EC
Stmn1	3.41e-38	0.320544	0.436	0.184	7.45e-34	EC
Psma7	6.75e-38	0.278069	0.955	0.81	1.47e-33	EC
Ndfip2	9.94e-38	0.31971	0.654	0.426	2.17e-33	EC
Hnrnpab	1.21e-37	0.273297	0.899	0.767	2.63e-33	EC
Eif3a	1.42e-37	0.283952	0.944	0.812	3.09e-33	EC
Fubp1	1.45e-37	0.330298	0.723	0.506	3.16e-33	EC
Klf7	2.41e-37	0.341152	0.691	0.441	5.26e-33	EC
Ethe1	2.54e-37	0.34975	0.476	0.251	5.55e-33	EC
Hnrnpu	2.55e-37	0.283596	0.915	0.781	5.56e-33	EC
Tnfaip1	3.78e-37	0.36209	0.577	0.367	8.26e-33	EC
Cbx5	4.36e-37	0.333984	0.612	0.372	9.52e-33	EC
Pfkp	4.65e-37	0.324429	0.676	0.4	1.01e-32	EC
Gsk3b	5.36e-37	0.32485	0.846	0.668	1.17e-32	EC
Myl12a	5.43e-37	0.260395	0.957	0.86	1.19e-32	EC
Pacsin2	7.81e-37	0.305826	0.495	0.259	1.71e-32	EC
Hnrnpa0	1.57e-36	0.279703	0.928	0.765	3.42e-32	EC
Camk2d	1.59e-36	0.329866	0.806	0.603	3.48e-32	EC
Hnrnpf	2.66e-36	0.250068	0.928	0.842	5.81e-32	EC
Spata6	2.92e-36	0.256183	0.404	0.185	6.38e-32	EC
Lxn	3.03e-36	0.483978	0.54	0.348	6.62e-32	EC
Ptges3	3.07e-36	0.294072	0.859	0.693	6.7e-32	EC
Bod1	3.47e-36	0.356772	0.585	0.365	7.59e-32	EC
Trp53	3.86e-36	0.344125	0.596	0.379	8.43e-32	EC
Rheb	6.43e-36	0.275124	0.878	0.71	1.4e-31	EC
Myh9	7.04e-36	0.317506	0.824	0.64	1.54e-31	EC
Tpm3	7.08e-36	0.3342	0.747	0.553	1.54e-31	EC
Lmo4	9.67e-36	0.403518	0.816	0.605	2.11e-31	EC
Pitrm1	1.12e-35	0.258864	0.436	0.204	2.44e-31	EC
Aqp1	1.25e-35	0.455576	0.457	0.248	2.73e-31	EC
Pdcd10	1.28e-35	0.299535	0.745	0.558	2.8e-31	EC
Ivns1abp	1.6e-35	0.310947	0.556	0.318	3.49e-31	EC
Eif2b2	2.2e-35	0.391274	0.551	0.35	4.79e-31	EC
Plscr3	4.12e-35	0.301876	0.543	0.32	8.99e-31	EC
Map3k4	4.36e-35	0.261481	0.367	0.159	9.53e-31	EC
Fyttd1	4.85e-35	0.345068	0.702	0.508	1.06e-30	EC
Capza2	6.73e-35	0.26494	0.907	0.781	1.47e-30	EC
Dnaja1	7.66e-35	0.304246	0.856	0.715	1.67e-30	EC
Fxyd5	8.79e-35	0.326255	0.867	0.71	1.92e-30	EC
Gngt2	1.43e-34	0.273151	0.314	0.122	3.13e-30	EC
Nap1l1	1.73e-34	0.297261	0.88	0.719	3.77e-30	EC
Nedd4l	4.36e-34	0.267356	0.301	0.115	9.52e-30	EC
Mrpl13	4.55e-34	0.303709	0.715	0.506	9.93e-30	EC
Abhd17a	7.4e-34	0.312298	0.689	0.516	1.61e-29	EC
Rdx	7.89e-34	0.291252	0.867	0.681	1.72e-29	EC
Mid2	8.67e-34	0.285388	0.343	0.15	1.89e-29	EC
Hmg20b	9.63e-34	0.298253	0.649	0.423	2.1e-29	EC
Itsn2	1.19e-33	0.251999	0.489	0.249	2.59e-29	EC
Psmc6	1.2e-33	0.287868	0.835	0.67	2.63e-29	EC
Pafah1b1	1.33e-33	0.258997	0.918	0.8	2.91e-29	EC
Tacc2	1.41e-33	0.259378	0.394	0.182	3.08e-29	EC
Cmtm3	1.58e-33	0.286638	0.503	0.257	3.45e-29	EC
Morf4l2	1.92e-33	0.25611	0.915	0.777	4.19e-29	EC
Zfp664	2.15e-33	0.251786	0.426	0.206	4.7e-29	EC
Atp9a	2.56e-33	0.250362	0.388	0.178	5.6e-29	EC
Cnih4	2.6e-33	0.312414	0.747	0.575	5.68e-29	EC
Txnip	3.55e-33	0.364988	0.702	0.449	7.76e-29	EC
Actl6a	5.14e-33	0.262241	0.548	0.308	1.12e-28	EC
Mrpl33	6.66e-33	0.277947	0.907	0.759	1.45e-28	EC
Sdhb	6.66e-33	0.308038	0.785	0.598	1.45e-28	EC
Kmt5a	7.2e-33	0.336543	0.609	0.387	1.57e-28	EC
Cers2	1.06e-32	0.28266	0.774	0.571	2.31e-28	EC
Llph	1.26e-32	0.290566	0.761	0.565	2.74e-28	EC
Cd81	1.51e-32	0.256835	0.965	0.828	3.31e-28	EC
Pdlim4	3.1e-32	0.375205	0.58	0.377	6.77e-28	EC
Snrk	4.35e-32	0.353254	0.412	0.211	9.5e-28	EC
Rab10	4.73e-32	0.2724	0.84	0.686	1.03e-27	EC
Selenow	5.62e-32	0.32083	0.875	0.698	1.23e-27	EC
Samd4b	8.6e-32	0.306764	0.596	0.39	1.88e-27	EC
S100a13	1.46e-31	0.279476	0.878	0.679	3.19e-27	EC
Anp32b	1.92e-31	0.262654	0.926	0.796	4.19e-27	EC
Hes1	2.32e-31	0.378581	0.875	0.621	5.06e-27	EC
Hmgb1	2.76e-31	0.267273	0.91	0.784	6.04e-27	EC
Ppfibp1	3.77e-31	0.301248	0.795	0.583	8.23e-27	EC
Emp1	4.23e-31	0.312836	0.87	0.658	9.24e-27	EC
Lims1	4.72e-31	0.303257	0.718	0.52	1.03e-26	EC
Psmd4	4.81e-31	0.264992	0.84	0.686	1.05e-26	EC
Gng11	5.17e-31	0.495543	0.718	0.599	1.13e-26	EC
Smad4	6.56e-31	0.299006	0.657	0.453	1.43e-26	EC
Dclk1	8.44e-31	0.389225	0.441	0.242	1.84e-26	EC
Riok3	9.92e-31	0.290034	0.71	0.527	2.17e-26	EC
Dlg1	1.76e-30	0.280284	0.513	0.301	3.85e-26	EC
Smim15	1.83e-30	0.280822	0.529	0.312	4e-26	EC
Rab18	1.88e-30	0.271431	0.822	0.644	4.1e-26	EC
Cdc42bpa	1.97e-30	0.322667	0.614	0.398	4.3e-26	EC
Psmd11	2.8e-30	0.279413	0.766	0.584	6.1e-26	EC
Nono	2.83e-30	0.269947	0.785	0.637	6.18e-26	EC
Nras	3.01e-30	0.286364	0.67	0.473	6.57e-26	EC
Nrn1	3.35e-30	0.316986	0.298	0.12	7.3e-26	EC
Amotl1	3.41e-30	0.284153	0.572	0.359	7.45e-26	EC
Litaf	4.12e-30	0.332425	0.755	0.626	8.98e-26	EC
Cd93	4.31e-30	0.463225	0.364	0.169	9.4e-26	EC
Cct3	4.53e-30	0.284427	0.793	0.625	9.88e-26	EC
Txnl1	4.77e-30	0.252176	0.835	0.705	1.04e-25	EC
Tgfb2	5.78e-30	0.324072	0.516	0.296	1.26e-25	EC
Tmem63b	5.93e-30	0.264483	0.508	0.292	1.29e-25	EC
Adam10	6.28e-30	0.280238	0.699	0.462	1.37e-25	EC
Mbnl2	7.17e-30	0.290391	0.851	0.697	1.56e-25	EC
Wasf2	8.03e-30	0.285062	0.761	0.603	1.75e-25	EC
Elk3	8.05e-30	0.279692	0.449	0.237	1.76e-25	EC
Prkar1a	8.51e-30	0.252882	0.886	0.768	1.86e-25	EC
Zyx	9.46e-30	0.289652	0.628	0.413	2.07e-25	EC
Mtch1	1.15e-29	0.259947	0.878	0.732	2.51e-25	EC
Myo10	1.16e-29	0.307347	0.801	0.622	2.52e-25	EC
Rap1a	1.31e-29	0.27092	0.747	0.583	2.86e-25	EC
Tead1	1.31e-29	0.277823	0.614	0.389	2.86e-25	EC
Pdcl3	2.12e-29	0.279397	0.702	0.538	4.64e-25	EC
Wdr70	2.81e-29	0.264941	0.447	0.24	6.14e-25	EC
Pam	2.95e-29	0.350927	0.665	0.475	6.45e-25	EC
Cdh13	2.97e-29	0.271935	0.316	0.14	6.49e-25	EC
Igfbp5	3.54e-29	0.416751	0.332	0.139	7.73e-25	EC
Bax	5.21e-29	0.270303	0.886	0.759	1.14e-24	EC
Cyfip1	7.17e-29	0.264235	0.617	0.394	1.57e-24	EC
Sfxn3	1e-28	0.272308	0.519	0.297	2.19e-24	EC
Wwc2	1.09e-28	0.28714	0.625	0.422	2.39e-24	EC
Dlgap4	1.13e-28	0.2725	0.628	0.42	2.47e-24	EC
Pa2g4	1.15e-28	0.28394	0.734	0.538	2.5e-24	EC
Dynlrb1	1.23e-28	0.254355	0.891	0.738	2.69e-24	EC
Wdr1	1.73e-28	0.268419	0.811	0.655	3.78e-24	EC
Gnaq	2.14e-28	0.265149	0.588	0.361	4.68e-24	EC
Tpm3-rs7	2.17e-28	0.257922	0.441	0.232	4.74e-24	EC
Psmd7	2.25e-28	0.264429	0.814	0.672	4.91e-24	EC
Srsf3	2.97e-28	0.268519	0.878	0.75	6.48e-24	EC
Map4k5	3.38e-28	0.274954	0.436	0.239	7.38e-24	EC
Sh3pxd2a	3.41e-28	0.336264	0.646	0.459	7.43e-24	EC
Fosl2	4.24e-28	0.304713	0.729	0.516	9.26e-24	EC
Slc44a2	7.74e-28	0.293822	0.468	0.263	1.69e-23	EC
Hmgb2	7.75e-28	0.276176	0.66	0.407	1.69e-23	EC
Cct7	8.85e-28	0.253171	0.827	0.71	1.93e-23	EC
Ppp2r1a	1.05e-27	0.258342	0.755	0.575	2.29e-23	EC
Fam198b	1.1e-27	0.346068	0.383	0.198	2.4e-23	EC
Tsg101	1.17e-27	0.282229	0.673	0.495	2.56e-23	EC
Prpf8	1.21e-27	0.264656	0.609	0.401	2.63e-23	EC
Bub3	1.37e-27	0.265037	0.678	0.483	3e-23	EC
Arrdc3	1.37e-27	0.264788	0.404	0.201	3e-23	EC
Rsu1	1.43e-27	0.280795	0.691	0.515	3.11e-23	EC
Eif4a2	1.98e-27	0.25759	0.843	0.667	4.32e-23	EC
Zc3h15	2.4e-27	0.26353	0.785	0.647	5.24e-23	EC
Rsrc2	2.43e-27	0.255021	0.777	0.594	5.3e-23	EC
Spata13	3.71e-27	0.293148	0.519	0.315	8.09e-23	EC
Arglu1	5.77e-27	0.286506	0.644	0.448	1.26e-22	EC
Aebp1	6.95e-27	0.501708	0.649	0.509	1.52e-22	EC
Ahnak	8.63e-27	0.260388	0.976	0.874	1.88e-22	EC
Snx6	8.84e-27	0.283496	0.676	0.512	1.93e-22	EC
Capn2	9.75e-27	0.26923	0.705	0.528	2.13e-22	EC
Nectin2	1.01e-26	0.280385	0.293	0.131	2.21e-22	EC
Arl5a	1.13e-26	0.328156	0.585	0.383	2.47e-22	EC
Pcnp	1.36e-26	0.275637	0.755	0.575	2.98e-22	EC
Ddx46	1.46e-26	0.256542	0.593	0.385	3.2e-22	EC
Lbh	2.79e-26	0.367734	0.633	0.453	6.08e-22	EC
Plpp2	3.2e-26	0.251519	0.412	0.226	6.98e-22	EC
Prpf40a	3.51e-26	0.263201	0.774	0.619	7.67e-22	EC
Dapk3	3.53e-26	0.273907	0.606	0.429	7.71e-22	EC
Brd4	3.71e-26	0.262564	0.734	0.551	8.09e-22	EC
Fbxo32	3.71e-26	0.268894	0.479	0.263	8.11e-22	EC
Lin7c	3.78e-26	0.270187	0.569	0.377	8.24e-22	EC
Rab12	4.69e-26	0.267914	0.662	0.486	1.02e-21	EC
Pepd	4.86e-26	0.262626	0.532	0.32	1.06e-21	EC
Mkln1	5.75e-26	0.263528	0.657	0.451	1.25e-21	EC
Adamts1	7.77e-26	0.349911	0.684	0.452	1.7e-21	EC
Taok1	1.09e-25	0.277972	0.694	0.522	2.38e-21	EC
S100b	1.12e-25	0.329301	0.274	0.116	2.45e-21	EC
Mocs2	1.21e-25	0.254818	0.705	0.495	2.64e-21	EC
Strn3	1.39e-25	0.264572	0.713	0.527	3.03e-21	EC
Tulp4	1.6e-25	0.288034	0.715	0.545	3.48e-21	EC
Bnip2	1.69e-25	0.252337	0.747	0.615	3.68e-21	EC
Tiprl	2.39e-25	0.258583	0.596	0.412	5.22e-21	EC
Spag9	2.76e-25	0.251427	0.822	0.666	6.04e-21	EC
Sptssa	2.9e-25	0.263929	0.694	0.502	6.33e-21	EC
Txndc9	3.09e-25	0.251206	0.75	0.614	6.75e-21	EC
Ddah2	3.58e-25	0.272085	0.447	0.256	7.83e-21	EC
Psmc4	4.54e-25	0.282654	0.691	0.56	9.92e-21	EC
Emp2	4.98e-25	0.298006	0.668	0.467	1.09e-20	EC
Ppm1a	5.09e-25	0.263233	0.715	0.53	1.11e-20	EC
Mrpl15	5.38e-25	0.27782	0.606	0.451	1.17e-20	EC
Fxr1	6.64e-25	0.269095	0.726	0.578	1.45e-20	EC
Gtpbp4	6.94e-25	0.27231	0.657	0.482	1.52e-20	EC
Trove2	9.68e-25	0.275025	0.527	0.336	2.11e-20	EC
Sertad2	1.02e-24	0.281453	0.601	0.42	2.22e-20	EC
Ralbp1	1.12e-24	0.261724	0.641	0.465	2.45e-20	EC
Tln1	1.51e-24	0.255287	0.761	0.602	3.29e-20	EC
Ythdc1	1.87e-24	0.254335	0.689	0.508	4.08e-20	EC
Cast	1.98e-24	0.251267	0.71	0.513	4.32e-20	EC
Stim1	2.33e-24	0.258761	0.367	0.192	5.09e-20	EC
Nol7	2.53e-24	0.251175	0.763	0.629	5.52e-20	EC
Emc6	2.67e-24	0.25175	0.707	0.555	5.83e-20	EC
Pak2	2.76e-24	0.254393	0.71	0.562	6.02e-20	EC
Tubb5	2.78e-24	0.272895	0.888	0.788	6.07e-20	EC
Fndc1	2.82e-24	0.266893	0.245	0.099	6.15e-20	EC
Tgfbr2	2.93e-24	0.320377	0.559	0.389	6.41e-20	EC
Dynlt3	3.12e-24	0.251982	0.774	0.6	6.81e-20	EC
Nek7	3.14e-24	0.296487	0.543	0.356	6.87e-20	EC
Card19	3.33e-24	0.262736	0.753	0.56	7.27e-20	EC
Hspd1	3.6e-24	0.251615	0.827	0.639	7.85e-20	EC
Vps36	3.89e-24	0.260679	0.606	0.437	8.5e-20	EC
Fam96b	4.35e-24	0.260678	0.63	0.477	9.5e-20	EC
Acot9	5.15e-24	0.25751	0.58	0.412	1.12e-19	EC
Zmynd11	5.83e-24	0.289295	0.588	0.416	1.27e-19	EC
Bcl10	6.68e-24	0.306567	0.559	0.385	1.46e-19	EC
Chic2	6.79e-24	0.266914	0.763	0.659	1.48e-19	EC
Lrrc8a	6.8e-24	0.250813	0.471	0.287	1.48e-19	EC
Ebna1bp2	7.07e-24	0.264178	0.625	0.457	1.54e-19	EC
Cd44	7.91e-24	0.305312	0.753	0.581	1.73e-19	EC
Alyref	8.28e-24	0.25219	0.662	0.478	1.81e-19	EC
Zbtb7a	8.42e-24	0.26275	0.572	0.386	1.84e-19	EC
Kras	9.97e-24	0.257211	0.609	0.432	2.18e-19	EC
Arhgef2	1.02e-23	0.257146	0.524	0.327	2.22e-19	EC
App	1.14e-23	0.272396	0.867	0.715	2.5e-19	EC
Serinc5	2.61e-23	0.295943	0.348	0.182	5.69e-19	EC
Cbfb	2.81e-23	0.301548	0.628	0.46	6.13e-19	EC
Comt	3e-23	0.269177	0.676	0.527	6.54e-19	EC
Akirin2	3.54e-23	0.259592	0.62	0.452	7.74e-19	EC
Bzw2	3.96e-23	0.253098	0.508	0.329	8.65e-19	EC
Slc39a6	6.59e-23	0.251218	0.508	0.322	1.44e-18	EC
Anxa3	8.08e-23	0.372355	0.601	0.472	1.76e-18	EC
Sh3bgrl3	9.94e-23	0.258687	0.851	0.76	2.17e-18	EC
Rsrp1	1.31e-22	0.259209	0.715	0.534	2.85e-18	EC
Denr	1.5e-22	0.267825	0.726	0.591	3.27e-18	EC
Arhgap29	1.55e-22	0.414017	0.402	0.254	3.37e-18	EC
Acyp2	1.71e-22	0.267949	0.449	0.28	3.73e-18	EC
Pnp	4.18e-22	0.284711	0.633	0.49	9.12e-18	EC
Ercc1	5.26e-22	0.317364	0.551	0.396	1.15e-17	EC
Map4k4	5.33e-22	0.267304	0.779	0.685	1.16e-17	EC
Secisbp2l	9.34e-22	0.251695	0.476	0.295	2.04e-17	EC
Afap1	1.14e-21	0.262987	0.497	0.319	2.49e-17	EC
Rbpms	1.36e-21	0.301492	0.441	0.27	2.96e-17	EC
Crebrf	1.98e-21	0.256523	0.516	0.332	4.33e-17	EC
Timp3	2.27e-21	0.273709	0.734	0.478	4.96e-17	EC
Hook3	3.49e-21	0.250423	0.649	0.494	7.62e-17	EC
Ccnd1	7.37e-21	0.336176	0.699	0.522	1.61e-16	EC
Cdh2	9.65e-21	0.416752	0.559	0.478	2.11e-16	EC
Dock1	1.24e-20	0.258068	0.527	0.364	2.71e-16	EC
H1f0	2.36e-20	0.280546	0.739	0.585	5.15e-16	EC
Arid5b	2.52e-20	0.26047	0.729	0.576	5.51e-16	EC
Arid1a	2.91e-20	0.253448	0.572	0.406	6.35e-16	EC
Pi4k2b	4.73e-20	0.286048	0.452	0.299	1.03e-15	EC
Rassf1	4.76e-20	0.253341	0.622	0.459	1.04e-15	EC
Hspb1	7.47e-20	0.366708	0.484	0.304	1.63e-15	EC
Adgrl2	1.27e-19	0.261482	0.348	0.191	2.78e-15	EC
Filip1l	3.41e-19	0.281192	0.449	0.286	7.45e-15	EC
Pdgfa	1.75e-18	0.269143	0.723	0.588	3.83e-14	EC
Pik3c2a	3.99e-18	0.254776	0.471	0.329	8.71e-14	EC
Ankrd50	4.78e-18	0.264081	0.372	0.227	1.04e-13	EC
Ugp2	5.06e-18	0.378242	0.676	0.572	1.1e-13	EC
Synm	5.52e-18	0.292921	0.364	0.219	1.21e-13	EC
Acap2	2.22e-17	0.262886	0.577	0.43	4.84e-13	EC
Dhrs1	2.29e-17	0.285133	0.537	0.413	5.01e-13	EC
Mast4	4.89e-16	0.385144	0.434	0.336	1.07e-11	EC
S100a4	5.51e-16	0.361175	0.657	0.547	1.2e-11	EC
Sorbs2	2.78e-15	0.258567	0.476	0.344	6.07e-11	EC
Apln	3.85e-13	0.444691	0.327	0.222	8.41e-09	EC
Rftn2	7.76e-12	0.253291	0.364	0.27	1.69e-07	EC
S1pr1	1.57e-11	0.322398	0.391	0.297	3.43e-07	EC
Ddah1	1.69e-11	0.302399	0.375	0.281	3.69e-07	EC
Adgrf5	3.7e-11	0.300044	0.375	0.286	8.08e-07	EC
Csrp2	2.59e-10	0.262243	0.606	0.499	5.65e-06	EC
Ly6a	7.63e-10	0.327951	0.277	0.176	1.67e-05	EC
Ralb	1.11e-09	0.260809	0.455	0.401	2.42e-05	EC
Ece1	1.87e-09	0.26036	0.476	0.424	4.09e-05	EC
Tiparp	2.02e-08	0.267477	0.63	0.601	0.000441065	EC
Nfib	3.26e-08	0.25201	0.46	0.404	0.000712182	EC
S100a9	0	2.79141	0.998	0.159	0	GC
S100a8	0	2.73583	0.997	0.157	0	GC
Ngp	0	2.58942	0.948	0.058	0	GC
Lcn2	0	2.3816	0.969	0.033	0	GC
Chil3	0	2.37726	0.975	0.106	0	GC
Camp	0	2.37398	0.848	0.054	0	GC
Pglyrp1	0	1.98175	0.966	0.019	0	GC
Wfdc21	0	1.92259	0.907	0.021	0	GC
Ltf	0	1.74714	0.666	0.007	0	GC
Retnlg	0	1.68727	0.637	0.008	0	GC
Cd52	0	1.52032	0.91	0.089	0	GC
F630028O10Rik	0	1.48631	0.845	0.018	0	GC
Arhgdib	0	1.46294	0.953	0.277	0	GC
Srgn	0	1.41918	0.957	0.307	0	GC
Alox5ap	0	1.41065	0.954	0.192	0	GC
Gmfg	0	1.36812	0.9	0.122	0	GC
AA467197	0	1.3378	0.742	0.03	0	GC
Coro1a	0	1.32706	0.89	0.122	0	GC
Ifitm6	0	1.31881	0.611	0.011	0	GC
BC018473	0	1.30743	0.625	0.022	0	GC
Olfm4	0	1.2895	0.421	0.004	0	GC
Rac2	0	1.28049	0.849	0.112	0	GC
Hmgb2	0	1.23988	0.855	0.398	0	GC
Mmp8	0	1.21358	0.465	0.022	0	GC
Tyrobp	0	1.20536	0.968	0.282	0	GC
Hp	0	1.20493	0.934	0.318	0	GC
Cd24a	0	1.1905	0.81	0.145	0	GC
Serpinb1a	0	1.17551	0.678	0.018	0	GC
Orm1	0	1.1692	0.646	0.028	0	GC
Cd177	0	1.1555	0.658	0.002	0	GC
Mcemp1	0	1.12856	0.693	0.006	0	GC
Ly6c2	0	1.12747	0.611	0.012	0	GC
Samsn1	0	1.12734	0.734	0.048	0	GC
Fcer1g	0	1.0999	0.946	0.344	0	GC
Chil1	0	1.09015	0.662	0.003	0	GC
Lyz2	0	1.08187	0.952	0.598	0	GC
Plac8	0	1.03195	0.594	0.078	0	GC
Mxd1	0	1.02581	0.715	0.236	0	GC
Ly6g	0	1.02208	0.505	0.002	0	GC
Spi1	0	1.01731	0.865	0.212	0	GC
Trem3	0	1.01593	0.655	0.006	0	GC
Lcp1	0	1.0118	0.894	0.245	0	GC
Ncf4	0	0.995279	0.728	0.113	0	GC
Clec4e	0	0.988607	0.722	0.198	0	GC
Prtn3	0	0.983805	0.352	0.023	0	GC
Msrb1	0	0.983804	0.952	0.656	0	GC
Cd14	0	0.983071	0.785	0.253	0	GC
C3	0	0.968914	0.644	0.044	0	GC
Lst1	0	0.968363	0.652	0.079	0	GC
Cybb	0	0.960679	0.791	0.234	0	GC
Igsf6	0	0.94782	0.733	0.136	0	GC
Syne1	0	0.945634	0.679	0.169	0	GC
Hcar2	0	0.910618	0.495	0.021	0	GC
Ltb4r1	0	0.90809	0.59	0.021	0	GC
Hmgn2	0	0.899071	0.628	0.274	0	GC
Ptprc	0	0.873305	0.71	0.159	0	GC
Lrg1	0	0.864178	0.54	0.011	0	GC
Itgam	0	0.862561	0.629	0.078	0	GC
Gpr141	0	0.861991	0.562	0.033	0	GC
Prdx6	0	0.859412	0.872	0.62	0	GC
Cd33	0	0.855249	0.56	0.068	0	GC
Sephs2	0	0.851678	0.634	0.146	0	GC
Elane	0	0.846065	0.238	0.007	0	GC
Ltb	0	0.839434	0.449	0.015	0	GC
Hcst	0	0.831449	0.611	0.066	0	GC
Pygl	0	0.826363	0.673	0.25	0	GC
G0s2	0	0.812936	0.533	0.074	0	GC
Cks2	0	0.811227	0.708	0.434	0	GC
Tkt	0	0.801558	0.84	0.683	0	GC
Lsp1	0	0.798408	0.601	0.16	0	GC
Ncf2	0	0.794685	0.69	0.165	0	GC
Cyba	0	0.787976	0.963	0.779	0	GC
Mgst2	0	0.785561	0.484	0.027	0	GC
Mgst1	0	0.784315	0.805	0.338	0	GC
Ncf1	0	0.780828	0.781	0.456	0	GC
Limd2	0	0.77951	0.627	0.189	0	GC
Cebpe	0	0.768615	0.462	0.002	0	GC
Vasp	0	0.767934	0.755	0.472	0	GC
Cd300lf	0	0.76387	0.48	0.029	0	GC
Itgb2	0	0.76248	0.596	0.104	0	GC
Il1r2	0	0.757593	0.395	0.011	0	GC
Ripor2	0	0.756887	0.491	0.039	0	GC
Glrx	0	0.756521	0.75	0.377	0	GC
Lyz1	0	0.752878	0.421	0.131	0	GC
Fpr2	0	0.749716	0.407	0.02	0	GC
Prdx5	0	0.744486	0.962	0.847	0	GC
Anxa1	0	0.741601	0.829	0.737	0	GC
Alas1	0	0.726989	0.557	0.191	0	GC
Asprv1	0	0.717772	0.268	0.003	0	GC
Sorl1	0	0.717625	0.475	0.013	0	GC
Sp140	0	0.691052	0.525	0.093	0	GC
Trem1	0	0.68911	0.403	0.015	0	GC
Hdc	0	0.688874	0.412	0.019	0	GC
Plbd1	0	0.685085	0.404	0.015	0	GC
Slc7a11	0	0.680024	0.485	0.126	0	GC
Il16	0	0.679478	0.459	0.027	0	GC
Pag1	0	0.676195	0.444	0.037	0	GC
Ms4a3	0	0.671553	0.323	0.004	0	GC
Napsa	0	0.670837	0.487	0.043	0	GC
Mmp9	0	0.669738	0.31	0.019	0	GC
Dhrs7	0	0.66922	0.682	0.487	0	GC
Gpsm3	0	0.668712	0.558	0.142	0	GC
Anxa3	0	0.668342	0.72	0.467	0	GC
Ptpn6	0	0.666876	0.537	0.107	0	GC
Ccl3	0	0.665256	0.428	0.131	0	GC
Gsr	0	0.660985	0.66	0.42	0	GC
Pnkp	0	0.654735	0.536	0.191	0	GC
Hhex	0	0.647862	0.423	0.018	0	GC
Sat1	0	0.64692	0.841	0.659	0	GC
Plaur	0	0.632414	0.663	0.446	0	GC
Myl12b	0	0.632363	0.771	0.564	0	GC
Sh3bgrl3	0	0.628097	0.906	0.758	0	GC
Ogfrl1	0	0.623933	0.51	0.155	0	GC
B230208H11Rik	0	0.619665	0.405	0.013	0	GC
Clec4a2	0	0.616532	0.488	0.102	0	GC
Tmsb4x	0	0.615049	0.999	0.972	0	GC
Taldo1	0	0.612372	0.843	0.647	0	GC
Cd53	0	0.608553	0.617	0.209	0	GC
Mrgpra2b	0	0.60735	0.332	0	0	GC
Tmcc1	0	0.60197	0.482	0.208	0	GC
N4bp1	0	0.598291	0.551	0.321	0	GC
Cotl1	0	0.597413	0.642	0.249	0	GC
Arrb2	0	0.58941	0.515	0.144	0	GC
Il18rap	0	0.584855	0.376	0.008	0	GC
Lmnb1	0	0.583212	0.434	0.085	0	GC
Mpo	0	0.582462	0.186	0.043	0	GC
Itgb2l	0	0.578489	0.374	0.001	0	GC
Adpgk	0	0.577324	0.502	0.276	0	GC
Slfn2	0	0.574954	0.722	0.3	0	GC
Irak3	0	0.569691	0.432	0.103	0	GC
Fgd4	0	0.567771	0.446	0.09	0	GC
Cdkn2d	0	0.566903	0.505	0.249	0	GC
C5ar1	0	0.565858	0.455	0.122	0	GC
Clec5a	0	0.563082	0.388	0.03	0	GC
Top2a	0	0.561153	0.33	0.115	0	GC
Gpr84	0	0.556843	0.368	0.019	0	GC
Cd37	0	0.555385	0.455	0.081	0	GC
Fam107b	0	0.550577	0.481	0.134	0	GC
Tuba4a	0	0.545936	0.449	0.173	0	GC
Fam49b	0	0.542744	0.589	0.36	0	GC
Aldh2	0	0.537191	0.754	0.657	0	GC
Clec12a	0	0.534512	0.453	0.1	0	GC
Acpp	0	0.534148	0.357	0.007	0	GC
Slpi	0	0.529691	0.486	0.208	0	GC
Sri	0	0.528576	0.763	0.645	0	GC
Hsd11b1	0	0.524296	0.376	0.018	0	GC
Ctsg	0	0.522845	0.205	0.006	0	GC
Ebi3	0	0.52225	0.356	0.019	0	GC
S1pr4	0	0.512995	0.341	0.003	0	GC
Tpm3	0	0.510283	0.698	0.551	0	GC
Map3k8	0	0.509225	0.37	0.117	0	GC
Il1f9	0	0.50869	0.273	0.003	0	GC
Arpc3	0	0.507874	0.891	0.804	0	GC
Pirb	0	0.505452	0.397	0.108	0	GC
Nfe2	0	0.499219	0.336	0.002	0	GC
Spn	0	0.497636	0.359	0.018	0	GC
Tnfaip8	0	0.496196	0.486	0.2	0	GC
H2afz	0	0.495892	0.898	0.895	0	GC
Ikzf1	0	0.493833	0.373	0.039	0	GC
Acod1	0	0.492832	0.305	0.062	0	GC
Pclaf	0	0.490971	0.319	0.108	0	GC
Gda	0	0.489689	0.43	0.148	0	GC
F10	0	0.48701	0.332	0.037	0	GC
BC100530	0	0.485423	0.179	0.001	0	GC
Lbr	0	0.481378	0.46	0.23	0	GC
Inpp1	0	0.478579	0.366	0.113	0	GC
Krt83	0	0.477971	0.284	0.004	0	GC
Tacstd2	0	0.477639	0.316	0.007	0	GC
Ankrd22	0	0.47478	0.304	0.001	0	GC
Fcgr3	0	0.473252	0.544	0.205	0	GC
Tm6sf1	0	0.472538	0.428	0.115	0	GC
Cntrl	0	0.470349	0.39	0.098	0	GC
Cyfip2	0	0.46921	0.406	0.12	0	GC
Msra	0	0.468922	0.384	0.118	0	GC
Fmnl1	0	0.468351	0.317	0.034	0	GC
Pira2	0	0.465279	0.329	0.098	0	GC
Arg2	0	0.463613	0.277	0.043	0	GC
Actr3	0	0.45422	0.851	0.784	0	GC
Rcsd1	0	0.449921	0.338	0.04	0	GC
Mki67	0	0.449393	0.314	0.103	0	GC
Mapk13	0	0.449229	0.307	0.023	0	GC
Arhgap30	0	0.444936	0.356	0.077	0	GC
Dok3	0	0.444499	0.344	0.046	0	GC
Hck	0	0.443583	0.367	0.115	0	GC
Fcnb	0	0.443335	0.237	0.001	0	GC
Neurl3	0	0.440201	0.326	0.063	0	GC
Ptafr	0	0.438728	0.354	0.104	0	GC
Ptpn18	0	0.436138	0.473	0.149	0	GC
Dstn	0	0.436066	0.851	0.828	0	GC
Pilra	0	0.432652	0.268	0.007	0	GC
Hcls1	0	0.431896	0.406	0.111	0	GC
Slc40a1	0	0.428083	0.354	0.066	0	GC
H3f3a	0	0.427394	0.984	0.935	0	GC
Cldn1	0	0.42707	0.261	0.009	0	GC
Pilrb2	0	0.425076	0.276	0.004	0	GC
Plscr1	0	0.423172	0.371	0.148	0	GC
Arhgap45	0	0.423062	0.336	0.053	0	GC
Csf2ra	0	0.418709	0.348	0.097	0	GC
Csf3r	0	0.418634	0.255	0.017	0	GC
Ccr1	0	0.412887	0.311	0.068	0	GC
Fpr1	0	0.412881	0.178	0.003	0	GC
Nfam1	0	0.411289	0.306	0.058	0	GC
AB124611	0	0.409153	0.346	0.084	0	GC
Stx11	0	0.408853	0.353	0.126	0	GC
Apbb1ip	0	0.405784	0.41	0.165	0	GC
S100a11	0	0.405182	0.954	0.834	0	GC
Crispld2	0	0.401311	0.259	0.058	0	GC
Itgal	0	0.401239	0.287	0.042	0	GC
Upp1	0	0.391353	0.219	0.011	0	GC
Hist1h1b	0	0.388011	0.212	0.046	0	GC
Lcp2	0	0.385292	0.367	0.108	0	GC
2023-09-01	0	0.38252	0.324	0.071	0	GC
Arpc1b	0	0.381753	0.886	0.833	0	GC
Padi4	0	0.381465	0.252	0.002	0	GC
Mrgpra2a	0	0.376838	0.201	0	0	GC
Rab11fip1	0	0.376138	0.279	0.062	0	GC
Cxcr2	0	0.369325	0.202	0.007	0	GC
Sell	0	0.365718	0.222	0.01	0	GC
Mctp1	0	0.363917	0.251	0.018	0	GC
Stap1	0	0.363696	0.283	0.042	0	GC
Sla	0	0.357404	0.305	0.063	0	GC
Rab44	0	0.35326	0.254	0.008	0	GC
Gpi1	0	0.352974	0.824	0.81	0	GC
Snx20	0	0.352334	0.294	0.078	0	GC
Arhgef3	0	0.35135	0.253	0.048	0	GC
Nhsl2	0	0.346066	0.235	0.008	0	GC
Mir142hg	0	0.344205	0.233	0.009	0	GC
Pilrb1	0	0.343227	0.219	0.002	0	GC
Sema4a	0	0.342731	0.243	0.034	0	GC
Pik3cg	0	0.341574	0.271	0.037	0	GC
1700020L24Rik	0	0.338971	0.247	0.002	0	GC
Nusap1	0	0.336236	0.238	0.052	0	GC
Lrmp	0	0.332203	0.271	0.036	0	GC
Abca13	0	0.32919	0.223	0.001	0	GC
Fgr	0	0.328077	0.209	0.012	0	GC
Rin3	0	0.326472	0.258	0.063	0	GC
Gca	0	0.326073	0.239	0.01	0	GC
Pstpip1	0	0.32521	0.285	0.066	0	GC
Rdh12	0	0.320877	0.195	0.008	0	GC
Fth1	0	0.309476	0.995	0.994	0	GC
Ces2g	0	0.307561	0.178	0.001	0	GC
Olr1	0	0.303055	0.206	0.011	0	GC
Ccdc88b	0	0.30212	0.22	0.027	0	GC
Ctse	0	0.301776	0.214	0.011	0	GC
Cd3d	0	0.300695	0.197	0.007	0	GC
Svip	0	0.299413	0.216	0.008	0	GC
Stfa2l1	0	0.294079	0.125	0.001	0	GC
Dach1	0	0.293146	0.204	0.007	0	GC
2310001H17Rik	0	0.292978	0.196	0.025	0	GC
Sh2d3c	0	0.28937	0.18	0.021	0	GC
Tmem40	0	0.287741	0.21	0.003	0	GC
Gmip	0	0.287378	0.245	0.063	0	GC
Lmo1	0	0.285991	0.203	0.017	0	GC
Acap1	0	0.283707	0.207	0.011	0	GC
Ffar2	0	0.283555	0.202	0.007	0	GC
Rgs18	0	0.283048	0.219	0.026	0	GC
Arhgap15	0	0.282275	0.219	0.046	0	GC
Nkg7	0	0.279489	0.171	0.005	0	GC
Arpc2	0	0.27763	0.92	0.91	0	GC
Ceacam10	0	0.275508	0.149	0	0	GC
E2f2	0	0.275072	0.196	0.02	0	GC
Fbxo5	0	0.274314	0.188	0.035	0	GC
Adgrg3	0	0.272887	0.203	0.014	0	GC
Myl10	0	0.271269	0.164	0.005	0	GC
Rab27a	0	0.270514	0.194	0.006	0	GC
Ceacam1	0	0.269889	0.19	0.005	0	GC
Lpcat2	0	0.264718	0.191	0.043	0	GC
Chit1	0	0.261426	0.165	0.001	0	GC
Tbc1d8	0	0.259457	0.189	0.011	0	GC
Pram1	0	0.257016	0.172	0.001	0	GC
Otos	0	0.25571	0.139	0.003	0	GC
Ptgs1	0	0.253643	0.207	0.045	0	GC
A530032D15Rik	0	0.250114	0.18	0.009	0	GC
Tsc22d4	1.05e-307	0.519864	0.615	0.463	2.29e-303	GC
Megf9	1.12e-302	0.318036	0.259	0.081	2.44e-298	GC
6430548M08Rik	2.31e-302	0.311321	0.217	0.058	5.05e-298	GC
Samd9l	1.94e-298	0.416485	0.354	0.142	4.23e-294	GC
Vsir	3.95e-296	0.391921	0.406	0.162	8.63e-292	GC
Cd47	4.62e-296	0.36599	0.763	0.765	1.01e-291	GC
Anxa11	4.77e-294	0.528413	0.533	0.328	1.04e-289	GC
Kif23	3.99e-292	0.267019	0.203	0.052	8.7e-288	GC
Pycard	4.39e-287	0.424996	0.378	0.159	9.59e-283	GC
Tcp11l2	4.11e-282	0.537891	0.538	0.349	8.96e-278	GC
Birc5	5.76e-282	0.44207	0.311	0.112	1.26e-277	GC
Tmem216	1.4e-279	0.321371	0.272	0.093	3.07e-275	GC
Rbm38	3.77e-279	0.288757	0.236	0.071	8.22e-275	GC
Arl11	1.16e-277	0.25548	0.218	0.059	2.54e-273	GC
Plek	8.9e-273	0.505613	0.58	0.298	1.94e-268	GC
Osgin1	1.39e-268	0.28001	0.216	0.06	3.03e-264	GC
Rnf130	1.09e-266	0.464531	0.58	0.397	2.38e-262	GC
Celf2	6.19e-265	0.410077	0.424	0.194	1.35e-260	GC
Lta4h	2.82e-263	0.529671	0.504	0.329	6.17e-259	GC
Ucp2	3.81e-258	0.408243	0.573	0.299	8.32e-254	GC
Ostf1	2.03e-256	0.317006	0.788	0.78	4.43e-252	GC
Mapkapk2	3.36e-256	0.479985	0.665	0.55	7.34e-252	GC
Prc1	4.17e-256	0.327188	0.256	0.084	9.11e-252	GC
Cdca8	2.33e-254	0.325712	0.27	0.093	5.09e-250	GC
Dedd2	3.43e-254	0.342732	0.275	0.1	7.49e-250	GC
Arpc5	4.27e-254	0.395032	0.754	0.683	9.33e-250	GC
Cenpa	1.21e-248	0.351078	0.281	0.099	2.64e-244	GC
Srpk2	3.44e-245	0.490242	0.556	0.403	7.52e-241	GC
Ptpre	3.9e-241	0.338415	0.359	0.143	8.52e-237	GC
Fxyd5	6.31e-241	0.383529	0.813	0.709	1.38e-236	GC
Ezr	1.52e-239	0.433124	0.477	0.268	3.31e-235	GC
Lyst	3.41e-239	0.48563	0.467	0.272	7.43e-235	GC
Txnip	1.72e-238	0.460233	0.636	0.446	3.76e-234	GC
Arhgef1	4.48e-238	0.469933	0.479	0.294	9.78e-234	GC
Fermt3	2.23e-236	0.265926	0.308	0.111	4.88e-232	GC
Hist1h1e	3.28e-225	0.376452	0.294	0.12	7.16e-221	GC
Rab20	1.89e-224	0.380199	0.404	0.189	4.13e-220	GC
Dgat2	1.44e-219	0.295016	0.231	0.08	3.15e-215	GC
Sod2	1.64e-219	0.476408	0.711	0.722	3.58e-215	GC
Slc2a3	9.89e-216	0.35617	0.287	0.118	2.16e-211	GC
Laptm5	3.33e-215	0.313246	0.607	0.279	7.26e-211	GC
Gpx1	6.06e-215	0.296037	0.809	0.845	1.32e-210	GC
Selplg	2.46e-214	0.303405	0.243	0.085	5.38e-210	GC
Nin	2.58e-212	0.348572	0.334	0.154	5.64e-208	GC
Sec11c	2.2e-210	0.405497	0.628	0.562	4.8e-206	GC
Gyg	1.24e-208	0.428907	0.506	0.337	2.7e-204	GC
Cenpf	3.59e-208	0.25702	0.191	0.057	7.83e-204	GC
Unc119	3.07e-205	0.381892	0.369	0.193	6.71e-201	GC
Sun2	1.79e-200	0.431683	0.5	0.345	3.9e-196	GC
Cdk2ap2	5.84e-194	0.448515	0.569	0.458	1.27e-189	GC
Tspo	9.37e-192	0.303191	0.751	0.755	2.05e-187	GC
Adipor1	1.42e-191	0.356382	0.701	0.683	3.1e-187	GC
Tax1bp1	1.1e-189	0.319536	0.732	0.725	2.4e-185	GC
Ak2	4.71e-189	0.411192	0.576	0.471	1.03e-184	GC
Ppp1r2	4.2e-186	0.390071	0.637	0.58	9.17e-182	GC
Fam241a	3.57e-184	0.370977	0.399	0.232	7.79e-180	GC
Mcl1	3.28e-182	0.267452	0.852	0.845	7.16e-178	GC
Agtrap	1.81e-180	0.339724	0.351	0.183	3.95e-176	GC
Rrm2	6.53e-179	0.386936	0.274	0.118	1.43e-174	GC
Rhog	1.11e-176	0.387083	0.531	0.364	2.41e-172	GC
Nadk	1.38e-176	0.452961	0.506	0.378	3.02e-172	GC
Lmo4	6.91e-175	0.356785	0.685	0.604	1.51e-170	GC
Rsrp1	8.58e-173	0.393352	0.618	0.533	1.87e-168	GC
Tecr	7.64e-172	0.273889	0.72	0.717	1.67e-167	GC
Hist1h2ap	9.04e-170	0.421868	0.235	0.095	1.97e-165	GC
Cpne2	1.06e-165	0.40834	0.378	0.223	2.32e-161	GC
Arfgef1	3.56e-162	0.40617	0.491	0.363	7.78e-158	GC
Tmx4	9.41e-162	0.366844	0.401	0.246	2.05e-157	GC
Agpat2	7.85e-161	0.37582	0.409	0.261	1.71e-156	GC
Ube2c	4.08e-160	0.373826	0.275	0.122	8.92e-156	GC
Syk	9.19e-160	0.276674	0.37	0.174	2.01e-155	GC
Acsl1	4.62e-158	0.421136	0.391	0.237	1.01e-153	GC
Atp11b	2.15e-156	0.404152	0.439	0.302	4.68e-152	GC
Dusp6	2.63e-156	0.299786	0.257	0.114	5.74e-152	GC
Arid3a	5.33e-156	0.30244	0.289	0.141	1.16e-151	GC
Lyn	2.01e-152	0.36298	0.448	0.283	4.38e-148	GC
Tmem38b	6.54e-152	0.385755	0.445	0.311	1.43e-147	GC
Triobp	1.23e-151	0.340953	0.336	0.188	2.68e-147	GC
Frat2	9.49e-151	0.270894	0.264	0.122	2.07e-146	GC
Marcksl1	1.36e-150	0.375907	0.614	0.462	2.96e-146	GC
Cpne3	4e-149	0.39522	0.464	0.341	8.73e-145	GC
Nfkbia	1.83e-145	0.312534	0.834	0.755	4e-141	GC
Glipr2	1.11e-143	0.310398	0.278	0.138	2.42e-139	GC
Smc2	7.27e-143	0.340176	0.292	0.148	1.59e-138	GC
Gmnn	1.15e-141	0.283888	0.257	0.119	2.51e-137	GC
Rassf5	3.93e-141	0.269037	0.261	0.122	8.58e-137	GC
Rab32	6.68e-140	0.320296	0.343	0.184	1.46e-135	GC
Casp4	3.16e-138	0.307372	0.333	0.177	6.9e-134	GC
Abtb1	4.8e-135	0.287232	0.254	0.122	1.05e-130	GC
Adgre5	6.36e-134	0.35548	0.386	0.237	1.39e-129	GC
Pgd	2.1e-133	0.330818	0.625	0.567	4.6e-129	GC
Sqor	7.62e-132	0.326838	0.357	0.214	1.66e-127	GC
Bcl2a1b	1.66e-129	0.263539	0.388	0.192	3.63e-125	GC
Retreg1	4.89e-129	0.319054	0.32	0.178	1.07e-124	GC
Stmn1	9.22e-129	0.37493	0.328	0.181	2.01e-124	GC
Herpud1	1.52e-128	0.271328	0.701	0.696	3.32e-124	GC
Iqsec1	3.31e-126	0.405265	0.443	0.335	7.23e-122	GC
Atp6v1e1	1.75e-125	0.281985	0.695	0.739	3.82e-121	GC
1810037I17Rik	2.46e-122	0.315758	0.642	0.708	5.38e-118	GC
Prkd3	6.4e-122	0.403986	0.391	0.271	1.4e-117	GC
Hjurp	2.4e-121	0.34211	0.337	0.209	5.25e-117	GC
Notch1	5.02e-121	0.346109	0.41	0.27	1.1e-116	GC
Thbs1	2.03e-118	0.281469	0.894	0.758	4.43e-114	GC
Mpp1	3.67e-116	0.3307	0.493	0.366	8.02e-112	GC
Snx10	6.98e-114	0.349896	0.386	0.251	1.52e-109	GC
Slc31a2	4.67e-112	0.35464	0.382	0.255	1.02e-107	GC
Nab1	3.29e-102	0.354897	0.476	0.397	7.18e-98	GC
Ints12	6.29e-102	0.268275	0.31	0.188	1.37e-97	GC
Bcl10	3.81e-101	0.336512	0.472	0.384	8.32e-97	GC
Add3	2.37e-98	0.262258	0.255	0.141	5.17e-94	GC
Grk2	1.85e-94	0.277575	0.385	0.262	4.05e-90	GC
Larp4b	1.94e-93	0.320597	0.569	0.557	4.25e-89	GC
Rapgef6	2.6e-93	0.318836	0.373	0.27	5.68e-89	GC
Adssl1	9.77e-93	0.264184	0.323	0.201	2.13e-88	GC
Ptbp3	1.44e-92	0.283346	0.598	0.573	3.15e-88	GC
Cdk1	2.52e-92	0.286942	0.274	0.158	5.49e-88	GC
Zcchc6	1.92e-88	0.330357	0.531	0.503	4.2e-84	GC
Ptpn1	2.12e-85	0.326863	0.539	0.488	4.62e-81	GC
Ccl6	8.9e-82	0.28633	0.231	0.119	1.94e-77	GC
Ccng2	4.07e-79	0.286767	0.373	0.273	8.89e-75	GC
Klf2	4.72e-79	0.339534	0.477	0.394	1.03e-74	GC
Grina	1.89e-78	0.342724	0.602	0.651	4.12e-74	GC
Atp6ap2	1.02e-77	0.281689	0.554	0.535	2.22e-73	GC
Plekhf2	1.35e-77	0.250945	0.279	0.177	2.94e-73	GC
R3hdm4	1.43e-76	0.333898	0.51	0.505	3.13e-72	GC
Diaph1	8.79e-76	0.271396	0.379	0.269	1.92e-71	GC
Fas	2.75e-72	0.364004	0.33	0.239	6.01e-68	GC
Tpd52	6.79e-66	0.295768	0.436	0.332	1.48e-61	GC
Pdzd8	8.92e-66	0.273607	0.323	0.239	1.95e-61	GC
Cd44	1.28e-65	0.268587	0.612	0.581	2.79e-61	GC
Asnsd1	1.79e-63	0.275406	0.357	0.288	3.9e-59	GC
Stk38	3e-61	0.299272	0.358	0.287	6.55e-57	GC
Crebrf	8.39e-59	0.283622	0.397	0.331	1.83e-54	GC
Baz1a	8.66e-58	0.262046	0.398	0.327	1.89e-53	GC
Plp2	3.79e-56	0.271289	0.492	0.481	8.26e-52	GC
Rsbn1l	4.26e-55	0.264767	0.377	0.315	9.3e-51	GC
Hspa4l	4.09e-53	0.255525	0.301	0.223	8.93e-49	GC
Phf20l1	4.78e-53	0.276689	0.437	0.404	1.04e-48	GC
Abhd5	1.9e-52	0.263044	0.448	0.412	4.14e-48	GC
Spata13	9.93e-51	0.298593	0.372	0.314	2.17e-46	GC
Gadd45a	4.58e-49	0.263125	0.327	0.249	1e-44	GC
Cmtm7	1.28e-47	0.278686	0.508	0.538	2.8e-43	GC
Gpcpd1	3.99e-47	0.303799	0.361	0.31	8.71e-43	GC
Tmpo	5.98e-47	0.266876	0.331	0.263	1.31e-42	GC
H2afx	7.21e-45	0.339743	0.308	0.253	1.57e-40	GC
Baz2b	1e-40	0.253632	0.401	0.373	2.19e-36	GC
Zfp131	1.62e-40	0.272822	0.368	0.334	3.53e-36	GC
Kmt5a	3.38e-37	0.255637	0.401	0.388	7.39e-33	GC
Slbp	2.41e-29	0.265299	0.371	0.36	5.26e-25	GC
Smc4	4.25e-29	0.303765	0.38	0.378	9.29e-25	GC
Timp3	0	1.11477	0.921	0.371	0	LMP
Acta2	0	0.961408	0.785	0.343	0	LMP
Tagln	0	0.957808	0.751	0.226	0	LMP
Tpm2	0	0.86562	0.935	0.428	0	LMP
Col3a1	0	0.845807	0.844	0.371	0	LMP
Aspn	0	0.804897	0.557	0.103	0	LMP
Csrp2	0	0.799713	0.89	0.404	0	LMP
Aebp1	0	0.786401	0.91	0.411	0	LMP
Myl9	0	0.784212	0.829	0.32	0	LMP
Mgp	0	0.760445	0.79	0.38	0	LMP
Col8a1	0	0.759535	0.816	0.244	0	LMP
Col12a1	0	0.752435	0.855	0.377	0	LMP
Col6a3	0	0.74729	0.921	0.451	0	LMP
Ccnd1	0	0.709909	0.871	0.437	0	LMP
Cald1	0	0.702134	0.991	0.642	0	LMP
Itm2a	0	0.684975	0.736	0.282	0	LMP
Prss23	0	0.684921	0.709	0.188	0	LMP
Wisp2	0	0.667441	0.597	0.123	0	LMP
Col6a2	0	0.658027	0.888	0.435	0	LMP
Col6a1	0	0.651221	0.929	0.524	0	LMP
Slc29a1	0	0.650233	0.899	0.405	0	LMP
Thbs2	0	0.637903	0.849	0.441	0	LMP
Ogn	0	0.632013	0.833	0.345	0	LMP
Phlda3	0	0.620854	0.931	0.509	0	LMP
Ndnf	0	0.614224	0.633	0.221	0	LMP
Sdc2	0	0.604516	0.938	0.522	0	LMP
Ptx3	0	0.60331	0.592	0.156	0	LMP
Tnc	0	0.603088	0.874	0.513	0	LMP
Fstl1	0	0.59886	0.904	0.354	0	LMP
Prrx2	0	0.597287	0.717	0.207	0	LMP
Cnn2	0	0.590021	0.937	0.573	0	LMP
Igfbp7	0	0.585089	0.925	0.508	0	LMP
Cnn3	0	0.574788	0.856	0.366	0	LMP
Vcl	0	0.568922	0.863	0.432	0	LMP
Fst	0	0.555078	0.86	0.436	0	LMP
Csrp1	0	0.546975	0.851	0.454	0	LMP
Inhba	0	0.540035	0.61	0.168	0	LMP
Prrx1	0	0.537775	0.912	0.485	0	LMP
Srpx2	0	0.536372	0.868	0.452	0	LMP
Ifitm3	0	0.536232	0.984	0.749	0	LMP
Postn	0	0.528263	0.575	0.255	0	LMP
Hspb1	0	0.526933	0.677	0.214	0	LMP
Fn1	0	0.524744	0.988	0.723	0	LMP
Fhl2	0	0.521229	0.767	0.268	0	LMP
Tnn	0	0.51162	0.584	0.246	0	LMP
Fmod	0	0.510888	0.656	0.348	0	LMP
Crlf1	0	0.509606	0.592	0.167	0	LMP
Sfrp2	0	0.49164	0.55	0.199	0	LMP
Fbln5	0	0.486379	0.751	0.262	0	LMP
Tubb5	0	0.482439	0.963	0.745	0	LMP
Palld	0	0.477969	0.863	0.452	0	LMP
Csf1	0	0.473625	0.8	0.388	0	LMP
Ctgf	0	0.472825	0.779	0.445	0	LMP
Fbln2	0	0.471496	0.518	0.126	0	LMP
Tgfb1i1	0	0.470486	0.748	0.259	0	LMP
Cyp26b1	0	0.46718	0.509	0.214	0	LMP
Loxl3	0	0.466129	0.706	0.333	0	LMP
Anxa1	0	0.464377	0.958	0.685	0	LMP
Cavin1	0	0.461913	0.85	0.411	0	LMP
S100a11	0	0.461291	0.988	0.8	0	LMP
Vgll3	0	0.460874	0.62	0.138	0	LMP
Mylk	0	0.459829	0.745	0.299	0	LMP
Tpm1	0	0.458992	0.981	0.714	0	LMP
Mmp14	0	0.457739	0.857	0.454	0	LMP
Actg2	0	0.456208	0.347	0.074	0	LMP
Tnfrsf12a	0	0.453849	0.734	0.362	0	LMP
Pdgfrb	0	0.450275	0.71	0.215	0	LMP
S100a4	0	0.444635	0.765	0.494	0	LMP
Timp2	0	0.443861	0.987	0.827	0	LMP
Fgf7	0	0.443199	0.728	0.301	0	LMP
Omd	0	0.440272	0.656	0.293	0	LMP
Lima1	0	0.437523	0.774	0.358	0	LMP
H19	0	0.436488	0.334	0.119	0	LMP
Fermt2	0	0.436014	0.871	0.493	0	LMP
Dpysl3	0	0.429086	0.782	0.378	0	LMP
Cavin3	0	0.429009	0.872	0.499	0	LMP
Ccnd2	0	0.425479	0.833	0.523	0	LMP
S100a6	0	0.42217	0.994	0.902	0	LMP
Twist1	0	0.42187	0.775	0.362	0	LMP
Siva1	0	0.417181	0.86	0.499	0	LMP
Pdlim5	0	0.416747	0.854	0.537	0	LMP
Hmgn1	0	0.414875	0.963	0.705	0	LMP
Snta1	0	0.414416	0.861	0.517	0	LMP
Wls	0	0.412831	0.923	0.606	0	LMP
Nedd4	0	0.412654	0.983	0.669	0	LMP
Timp1	0	0.412522	0.976	0.766	0	LMP
Antxr1	0	0.412256	0.769	0.304	0	LMP
Olfml2b	0	0.411221	0.654	0.199	0	LMP
Impdh2	0	0.410206	0.834	0.463	0	LMP
Selenow	0	0.410198	0.932	0.642	0	LMP
Actn1	0	0.410194	0.892	0.559	0	LMP
Dkk3	0	0.406431	0.576	0.188	0	LMP
Tspan4	0	0.406259	0.896	0.554	0	LMP
Eif3e	0	0.405189	0.973	0.763	0	LMP
Adamts1	0	0.403868	0.719	0.387	0	LMP
Dclk1	0	0.403449	0.599	0.155	0	LMP
Pmepa1	0	0.40252	0.9	0.585	0	LMP
Cdkn2a	0	0.401228	0.62	0.268	0	LMP
Prmt1	0	0.396634	0.798	0.428	0	LMP
Ak1	0	0.396325	0.843	0.463	0	LMP
Hspe1	0	0.393933	0.971	0.783	0	LMP
Serping1	0	0.392458	0.711	0.351	0	LMP
Tpm4	0	0.391698	0.957	0.734	0	LMP
Podnl1	0	0.389719	0.597	0.147	0	LMP
Cdk4	0	0.389706	0.891	0.564	0	LMP
Bok	0	0.388349	0.595	0.184	0	LMP
Crip2	0	0.385448	0.831	0.491	0	LMP
Cdkn2b	0	0.384599	0.527	0.175	0	LMP
Selenoh	0	0.381935	0.75	0.405	0	LMP
Ybx3	0	0.381903	0.871	0.585	0	LMP
Lgals1	0	0.379143	0.999	0.94	0	LMP
Myadm	0	0.376997	0.795	0.408	0	LMP
Kremen1	0	0.376464	0.592	0.164	0	LMP
Gas6	0	0.374389	0.913	0.571	0	LMP
Lpp	0	0.373665	0.88	0.539	0	LMP
Ccng1	0	0.373557	0.834	0.5	0	LMP
Ehd2	0	0.372857	0.632	0.168	0	LMP
Actn4	0	0.372649	0.915	0.632	0	LMP
Emp2	0	0.371963	0.783	0.391	0	LMP
Efemp2	0	0.369568	0.906	0.57	0	LMP
Flna	0	0.369315	0.905	0.606	0	LMP
Ephx1	0	0.368097	0.72	0.315	0	LMP
Tuba1b	0	0.367073	0.852	0.594	0	LMP
Tm4sf1	0	0.366344	0.66	0.301	0	LMP
Nsg1	0	0.365788	0.6	0.158	0	LMP
Ran	0	0.365702	0.953	0.795	0	LMP
Lmna	0	0.365118	0.979	0.826	0	LMP
Igfbp4	0	0.364944	0.906	0.564	0	LMP
Hspd1	0	0.364304	0.865	0.585	0	LMP
Rpl39l	0	0.363834	0.658	0.377	0	LMP
Ddah1	0	0.363272	0.575	0.209	0	LMP
Lmcd1	0	0.362624	0.481	0.084	0	LMP
Snrpd1	0	0.361639	0.853	0.564	0	LMP
C1qbp	0	0.360705	0.841	0.53	0	LMP
Enah	0	0.360393	0.834	0.468	0	LMP
Fgfr2	0	0.358421	0.828	0.503	0	LMP
Serpinb6a	0	0.357763	0.955	0.747	0	LMP
Rai14	0	0.357684	0.679	0.301	0	LMP
Ptprd	0	0.35688	0.842	0.468	0	LMP
Ltbp1	0	0.356448	0.799	0.43	0	LMP
Adm	0	0.350087	0.5	0.235	0	LMP
Rrm1	0	0.349056	0.641	0.276	0	LMP
Glrx3	0	0.348258	0.91	0.646	0	LMP
Fkbp1a	0	0.346909	0.97	0.782	0	LMP
Ryk	0	0.346895	0.853	0.493	0	LMP
Fbn1	0	0.346176	0.552	0.162	0	LMP
Olfml3	0	0.344072	0.871	0.57	0	LMP
Mxra8	0	0.343798	0.819	0.434	0	LMP
Amotl2	0	0.343712	0.734	0.394	0	LMP
Rab34	0	0.343447	0.811	0.448	0	LMP
Pcolce	0	0.342816	0.934	0.594	0	LMP
Edil3	0	0.340636	0.428	0.056	0	LMP
Snx7	0	0.340439	0.828	0.502	0	LMP
Parva	0	0.339045	0.775	0.393	0	LMP
Slc25a4	0	0.338831	0.981	0.761	0	LMP
Nap1l1	0	0.338775	0.913	0.672	0	LMP
Axl	0	0.338738	0.471	0.086	0	LMP
Npm3	0	0.33771	0.683	0.301	0	LMP
Nucks1	0	0.336925	0.874	0.58	0	LMP
Ercc1	0	0.336712	0.667	0.331	0	LMP
Hnrnpa1	0	0.335458	0.939	0.703	0	LMP
Dynlt3	0	0.335416	0.855	0.539	0	LMP
Nfix	0	0.333315	0.791	0.43	0	LMP
Pdlim7	0	0.333231	0.726	0.357	0	LMP
Ppp1r14b	0	0.333139	0.903	0.7	0	LMP
Fgfr1	0	0.332947	0.89	0.571	0	LMP
Ctnnd1	0	0.33259	0.809	0.481	0	LMP
Eno1	0	0.332097	0.862	0.613	0	LMP
Cks1b	0	0.331994	0.552	0.231	0	LMP
Mfge8	0	0.328815	0.85	0.506	0	LMP
Ccdc12	0	0.328669	0.854	0.524	0	LMP
Fat1	0	0.328533	0.93	0.61	0	LMP
Snrpg	0	0.327574	0.871	0.577	0	LMP
Pa2g4	0	0.325688	0.788	0.478	0	LMP
Snrpd2	0	0.325323	0.947	0.723	0	LMP
Pclaf	0	0.325227	0.267	0.074	0	LMP
Rras	0	0.325015	0.744	0.361	0	LMP
Tuba1a	0	0.324977	0.865	0.574	0	LMP
Nbl1	0	0.32485	0.624	0.279	0	LMP
Cacybp	0	0.323858	0.752	0.433	0	LMP
Irx3	0	0.32361	0.709	0.383	0	LMP
Eva1b	0	0.321162	0.794	0.458	0	LMP
Ppfibp1	0	0.321009	0.843	0.52	0	LMP
Snrpf	0	0.319862	0.877	0.606	0	LMP
Nudt4	0	0.319806	0.817	0.455	0	LMP
Fzd5	0	0.31977	0.735	0.414	0	LMP
Fhl1	0	0.319004	0.534	0.181	0	LMP
Ttc28	0	0.318926	0.647	0.268	0	LMP
Myl12a	0	0.318825	0.983	0.831	0	LMP
Npm1	0	0.318637	0.992	0.903	0	LMP
Vim	0	0.318342	0.998	0.951	0	LMP
Vasn	0	0.317296	0.815	0.476	0	LMP
Cct8	0	0.317049	0.935	0.713	0	LMP
Qsox1	0	0.317007	0.777	0.462	0	LMP
Nop58	0	0.314404	0.765	0.469	0	LMP
Snai2	0	0.313152	0.557	0.169	0	LMP
Lsm7	0	0.312792	0.752	0.44	0	LMP
Gsn	0	0.31226	0.956	0.728	0	LMP
Grb14	0	0.312116	0.606	0.248	0	LMP
Cmtm4	0	0.309639	0.638	0.271	0	LMP
Eef1d	0	0.309379	0.969	0.778	0	LMP
Msrb3	0	0.308603	0.735	0.396	0	LMP
Itgbl1	0	0.306275	0.386	0.092	0	LMP
Efnb1	0	0.305333	0.653	0.325	0	LMP
Prelp	0	0.305282	0.346	0.1	0	LMP
Cct4	0	0.305104	0.917	0.671	0	LMP
Tspan6	0	0.304956	0.696	0.337	0	LMP
Ranbp1	0	0.304105	0.849	0.639	0	LMP
Tead1	0	0.304086	0.687	0.317	0	LMP
Emp3	0	0.303899	0.979	0.843	0	LMP
Set	0	0.303772	0.905	0.692	0	LMP
Mrps16	0	0.303429	0.881	0.595	0	LMP
Dtymk	0	0.302885	0.699	0.381	0	LMP
Marcks	0	0.302349	0.972	0.719	0	LMP
Nradd	0	0.302262	0.602	0.231	0	LMP
Phldb2	0	0.302124	0.549	0.154	0	LMP
Ltbp2	0	0.301321	0.365	0.068	0	LMP
Lhfp	0	0.300607	0.853	0.514	0	LMP
Pdk4	0	0.300486	0.592	0.271	0	LMP
Ehd3	0	0.300372	0.691	0.362	0	LMP
Rock2	0	0.299165	0.852	0.572	0	LMP
Angptl2	0	0.298681	0.438	0.092	0	LMP
Snhg12	0	0.298365	0.691	0.375	0	LMP
Ddr2	0	0.298114	0.774	0.427	0	LMP
Tubb6	0	0.297968	0.645	0.336	0	LMP
Gng11	0	0.296247	0.85	0.538	0	LMP
Eif3i	0	0.296111	0.93	0.701	0	LMP
Ebf1	0	0.296099	0.808	0.412	0	LMP
Rpl13a	0	0.295683	0.958	0.749	0	LMP
Loxl1	0	0.295169	0.615	0.201	0	LMP
Megf10	0	0.294103	0.414	0.112	0	LMP
Smurf2	0	0.293791	0.784	0.474	0	LMP
Eif1ax	0	0.293545	0.897	0.636	0	LMP
Itgb5	0	0.293403	0.722	0.39	0	LMP
Nfib	0	0.291608	0.697	0.333	0	LMP
Ly6a	0	0.291107	0.327	0.14	0	LMP
Anxa2	0	0.290628	0.984	0.87	0	LMP
Grb10	0	0.29019	0.837	0.498	0	LMP
Eif5a	0	0.29013	0.977	0.86	0	LMP
Pappa	0	0.289856	0.462	0.157	0	LMP
Rpl22l1	0	0.289315	0.986	0.868	0	LMP
Dut	0	0.289161	0.534	0.215	0	LMP
Bax	0	0.289099	0.928	0.719	0	LMP
Pla2g16	0	0.288767	0.612	0.253	0	LMP
Cd81	0	0.28641	0.987	0.79	0	LMP
1500009L16Rik	0	0.285906	0.571	0.208	0	LMP
Paics	0	0.285845	0.711	0.359	0	LMP
Cnbp	0	0.285803	0.927	0.719	0	LMP
Lox	0	0.285757	0.986	0.762	0	LMP
Pten	0	0.285316	0.857	0.57	0	LMP
Pmm1	0	0.28521	0.623	0.264	0	LMP
Esyt2	0	0.285209	0.716	0.414	0	LMP
Eef1g	0	0.284514	0.99	0.858	0	LMP
Mmp2	0	0.284284	0.874	0.549	0	LMP
Cct5	0	0.283921	0.927	0.72	0	LMP
Ifi27	0	0.283749	0.801	0.487	0	LMP
Nenf	0	0.282507	0.951	0.697	0	LMP
Cct3	0	0.282198	0.842	0.573	0	LMP
Egr1	0	0.281718	0.859	0.549	0	LMP
Hdgf	0	0.280702	0.878	0.627	0	LMP
Selenom	0	0.279669	0.95	0.666	0	LMP
Wdfy1	0	0.279597	0.609	0.27	0	LMP
Wnt5a	0	0.278135	0.466	0.134	0	LMP
Dok1	0	0.278121	0.507	0.209	0	LMP
Lims1	0	0.277612	0.803	0.452	0	LMP
Fosl1	0	0.277352	0.431	0.093	0	LMP
Kpnb1	0	0.277349	0.775	0.463	0	LMP
Tgfb2	0	0.277117	0.529	0.24	0	LMP
Lurap1l	0	0.276917	0.445	0.144	0	LMP
Ptk7	0	0.276848	0.597	0.244	0	LMP
Comt	0	0.276812	0.78	0.466	0	LMP
Nudt21	0	0.276776	0.787	0.459	0	LMP
Hmga2	0	0.276724	0.304	0.08	0	LMP
2900026A02Rik	0	0.27669	0.482	0.142	0	LMP
Rbbp7	0	0.275836	0.743	0.409	0	LMP
Tceal8	0	0.274232	0.855	0.559	0	LMP
Tagln2	0	0.273716	0.851	0.541	0	LMP
U2af1	0	0.273588	0.843	0.594	0	LMP
Birc5	0	0.273546	0.25	0.083	0	LMP
Fam162a	0	0.273162	0.947	0.702	0	LMP
Pdlim2	0	0.272933	0.659	0.311	0	LMP
Mrpl33	0	0.272552	0.931	0.718	0	LMP
Myh9	0	0.272504	0.851	0.589	0	LMP
Ptms	0	0.272445	0.955	0.753	0	LMP
Thbs1	0	0.272305	0.928	0.72	0	LMP
Stmn1	0	0.272288	0.356	0.142	0	LMP
Pfdn1	0	0.271628	0.849	0.557	0	LMP
Gas1	0	0.271434	0.509	0.227	0	LMP
Tmem119	0	0.271345	0.801	0.483	0	LMP
Nop56	0	0.271069	0.629	0.357	0	LMP
Ugcg	0	0.270363	0.572	0.269	0	LMP
Rrm2	0	0.269993	0.298	0.078	0	LMP
Mxra7	0	0.269833	0.521	0.152	0	LMP
Anp32b	0	0.26963	0.939	0.762	0	LMP
Ptges3	0	0.269386	0.885	0.647	0	LMP
Mmp23	0	0.269363	0.869	0.548	0	LMP
Abracl	0	0.269285	0.864	0.63	0	LMP
Emp1	0	0.268755	0.878	0.605	0	LMP
Tomm5	0	0.268324	0.856	0.605	0	LMP
Prkar2b	0	0.267111	0.505	0.147	0	LMP
Klhdc2	0	0.266829	0.801	0.492	0	LMP
Hspb7	0	0.266808	0.632	0.392	0	LMP
Serbp1	0	0.266795	0.972	0.835	0	LMP
Eif3m	0	0.266157	0.919	0.695	0	LMP
Anxa3	0	0.26614	0.702	0.416	0	LMP
Ppic	0	0.266138	0.949	0.647	0	LMP
Bin1	0	0.265816	0.767	0.495	0	LMP
Bgn	0	0.265773	0.975	0.728	0	LMP
Bex3	0	0.265609	0.689	0.337	0	LMP
Rps27l	0	0.265593	0.99	0.886	0	LMP
Tmsb10	0	0.265016	0.992	0.844	0	LMP
Gm10260	0	0.264766	0.817	0.625	0	LMP
Cfl2	0	0.264549	0.706	0.4	0	LMP
Tns3	0	0.264498	0.81	0.491	0	LMP
Emc2	0	0.264368	0.796	0.459	0	LMP
Ptpn14	0	0.264118	0.61	0.276	0	LMP
Aprt	0	0.264089	0.931	0.734	0	LMP
Snrpe	0	0.26404	0.937	0.744	0	LMP
Rbm3	0	0.263868	0.982	0.866	0	LMP
Sri	0	0.263829	0.87	0.594	0	LMP
Maf	0	0.263484	0.764	0.444	0	LMP
Rpl3	0	0.263163	0.998	0.937	0	LMP
Cct7	0	0.26313	0.894	0.665	0	LMP
Apex1	0	0.262657	0.655	0.331	0	LMP
Scarf2	0	0.262428	0.638	0.304	0	LMP
Aimp1	0	0.261286	0.876	0.617	0	LMP
Pdgfa	0	0.261149	0.784	0.54	0	LMP
Alpl	0	0.261132	0.92	0.656	0	LMP
Hspb11	0	0.260879	0.682	0.356	0	LMP
Mprip	0	0.26073	0.826	0.515	0	LMP
Bcl7c	0	0.260692	0.708	0.365	0	LMP
Sugt1	0	0.259932	0.816	0.512	0	LMP
Scn1b	0	0.259626	0.565	0.241	0	LMP
Polk	0	0.259439	0.498	0.167	0	LMP
Cops6	0	0.259429	0.825	0.553	0	LMP
Rhoj	0	0.259285	0.521	0.163	0	LMP
Fbl	0	0.259137	0.733	0.426	0	LMP
Cdk1	0	0.25877	0.32	0.121	0	LMP
Mrpl17	0	0.257111	0.871	0.592	0	LMP
Tubb4b	0	0.256935	0.745	0.514	0	LMP
Rsl1d1	0	0.256915	0.804	0.529	0	LMP
Uqcc2	0	0.256669	0.925	0.707	0	LMP
Clic1	0	0.256289	0.93	0.735	0	LMP
Nsa2	0	0.256079	0.92	0.686	0	LMP
Rpl4	0	0.256039	0.992	0.888	0	LMP
Rbms3	0	0.255902	0.63	0.281	0	LMP
Clec11a	0	0.254176	0.585	0.332	0	LMP
Sp7	0	0.254121	0.741	0.456	0	LMP
Snu13	0	0.253635	0.866	0.636	0	LMP
Mmp13	0	0.253343	0.632	0.425	0	LMP
Trp53	0	0.253178	0.638	0.316	0	LMP
Cyr61	0	0.253019	0.917	0.639	0	LMP
Asph	0	0.252772	0.707	0.406	0	LMP
Tbca	0	0.251465	0.955	0.766	0	LMP
Wtip	0	0.251357	0.643	0.371	0	LMP
Pdha1	0	0.251069	0.814	0.509	0	LMP
Srm	0	0.250737	0.733	0.483	0	LMP
Ap3s1	0	0.250704	0.906	0.659	0	LMP
Colec12	0	0.250243	0.804	0.497	0	LMP
Cxcl12	0	1.70192	0.988	0.472	0	MALP
Igfbp4	0	1.41417	0.998	0.577	0	MALP
Adipoq	0	1.40731	0.754	0.089	0	MALP
Hp	0	1.37195	0.922	0.245	0	MALP
Kitl	0	1.32191	0.949	0.217	0	MALP
Lpl	0	1.25765	0.882	0.303	0	MALP
Esm1	0	1.21154	0.762	0.085	0	MALP
Vcam1	0	1.15334	0.838	0.195	0	MALP
Dpep1	0	1.14163	0.938	0.307	0	MALP
Il1rn	0	1.12874	0.829	0.227	0	MALP
Ogn	0	1.10234	0.912	0.372	0	MALP
Plpp3	0	1.10177	0.817	0.175	0	MALP
Fstl1	0	1.10142	0.956	0.39	0	MALP
Ebf1	0	1.07033	0.969	0.42	0	MALP
Fbln5	0	1.06407	0.881	0.281	0	MALP
Fmo1	0	1.05255	0.755	0.052	0	MALP
Arrdc4	0	1.01887	0.902	0.256	0	MALP
Cyp1b1	0	1.01713	0.903	0.235	0	MALP
Tgfbr3	0	1.00735	0.885	0.17	0	MALP
Gas6	0	1.00315	0.983	0.587	0	MALP
Tmem176b	0	0.996566	0.986	0.586	0	MALP
Mrps6	0	0.981022	0.886	0.332	0	MALP
Angpt1	0	0.960758	0.746	0.065	0	MALP
Cxcl14	0	0.955749	0.658	0.145	0	MALP
Tmem176a	0	0.955704	0.982	0.585	0	MALP
Slc5a3	0	0.954191	0.826	0.214	0	MALP
Mylk	0	0.944801	0.84	0.321	0	MALP
Ghr	0	0.940006	0.858	0.445	0	MALP
Kng1	0	0.936527	0.695	0.038	0	MALP
Plxna2	0	0.929781	0.747	0.145	0	MALP
Scp2	0	0.928124	0.976	0.711	0	MALP
1500009L16Rik	0	0.918539	0.822	0.2	0	MALP
Igfbp3	0	0.901292	0.457	0.042	0	MALP
Rarres2	0	0.890538	0.588	0.063	0	MALP
Id4	0	0.885537	0.75	0.177	0	MALP
Ebf3	0	0.877175	0.739	0.088	0	MALP
Sfrp1	0	0.875813	0.692	0.145	0	MALP
Fst	0	0.870097	0.931	0.459	0	MALP
Foxc1	0	0.869285	0.902	0.385	0	MALP
Vegfc	0	0.863182	0.707	0.059	0	MALP
Islr	0	0.862611	0.79	0.213	0	MALP
Mgst1	0	0.853574	0.833	0.277	0	MALP
Igfbp7	0	0.8499	0.945	0.538	0	MALP
Serping1	0	0.84706	0.868	0.356	0	MALP
Mmp13	0	0.84181	0.736	0.426	0	MALP
Plxdc2	0	0.84155	0.768	0.174	0	MALP
Loxl1	0	0.83195	0.804	0.206	0	MALP
Chrdl1	0	0.822737	0.572	0.062	0	MALP
Lmo4	0	0.821847	0.931	0.558	0	MALP
Nrp1	0	0.818423	0.836	0.299	0	MALP
Cdh11	0	0.816685	0.968	0.609	0	MALP
Col4a1	0	0.816492	0.739	0.141	0	MALP
Tmem86a	0	0.803678	0.689	0.191	0	MALP
Igfbp5	0	0.793211	0.438	0.097	0	MALP
Grem1	0	0.791319	0.57	0.106	0	MALP
Kng2	0	0.786742	0.624	0.026	0	MALP
2023-03-01	0	0.784817	0.712	0.109	0	MALP
Cebpa	0	0.774532	0.799	0.257	0	MALP
Mark1	0	0.769236	0.666	0.103	0	MALP
Gpm6b	0	0.767288	0.638	0.067	0	MALP
Spry1	0	0.764565	0.723	0.238	0	MALP
Csf1	0	0.754584	0.874	0.409	0	MALP
Myl9	0	0.751459	0.766	0.369	0	MALP
Pappa	0	0.73979	0.671	0.15	0	MALP
Pdlim2	0	0.737257	0.785	0.32	0	MALP
Rbpms	0	0.728394	0.755	0.199	0	MALP
Fgfr2	0	0.726903	0.908	0.517	0	MALP
Limch1	0	0.72683	0.526	0.097	0	MALP
Ptgfr	0	0.722309	0.61	0.057	0	MALP
Lepr	0	0.712986	0.555	0.073	0	MALP
Samhd1	0	0.709197	0.919	0.55	0	MALP
Itga1	0	0.707181	0.691	0.141	0	MALP
Col8a1	0	0.699991	0.662	0.312	0	MALP
Rspo3	0	0.698704	0.539	0.041	0	MALP
Cd302	0	0.69839	0.901	0.544	0	MALP
Epas1	0	0.697252	0.718	0.197	0	MALP
Rbp4	0	0.695486	0.708	0.413	0	MALP
Errfi1	0	0.69143	0.915	0.561	0	MALP
Gdpd2	0	0.691259	0.532	0.028	0	MALP
Marcks	0	0.686541	0.976	0.738	0	MALP
Ms4a4d	0	0.68144	0.55	0.061	0	MALP
Pparg	0	0.678627	0.603	0.097	0	MALP
S1pr1	0	0.678381	0.725	0.235	0	MALP
Palld	0	0.670925	0.864	0.484	0	MALP
Zfhx4	0	0.669261	0.738	0.294	0	MALP
Fabp4	0	0.667026	0.612	0.363	0	MALP
Pik3r1	0	0.667021	0.862	0.455	0	MALP
Nudt4	0	0.661116	0.863	0.476	0	MALP
Emc2	0	0.655749	0.867	0.475	0	MALP
Svep1	0	0.654772	0.642	0.092	0	MALP
Snai2	0	0.653705	0.67	0.183	0	MALP
Cald1	0	0.650789	0.984	0.67	0	MALP
Gpx3	0	0.650367	0.972	0.71	0	MALP
Mgp	0	0.645517	0.713	0.423	0	MALP
Nfib	0	0.645477	0.815	0.344	0	MALP
Fmo2	0	0.644732	0.423	0.023	0	MALP
Apoe	0	0.64103	0.915	0.57	0	MALP
Glul	0	0.640651	0.738	0.266	0	MALP
Pim3	0	0.63549	0.753	0.397	0	MALP
Cyb5a	0	0.635297	0.897	0.551	0	MALP
Slc29a1	0	0.631366	0.852	0.451	0	MALP
Glrx	0	0.629824	0.745	0.332	0	MALP
Ahcyl1	0	0.629569	0.917	0.594	0	MALP
Sult1a1	0	0.626888	0.559	0.051	0	MALP
Egr1	0	0.621967	0.888	0.569	0	MALP
Rras	0	0.619789	0.822	0.379	0	MALP
Plagl1	0	0.61908	0.583	0.129	0	MALP
Adamts1	0	0.61852	0.745	0.41	0	MALP
Tnc	0	0.618163	0.816	0.55	0	MALP
Nfia	0	0.614779	0.701	0.212	0	MALP
Gas1	0	0.612007	0.623	0.233	0	MALP
Kctd12	0	0.611593	0.687	0.288	0	MALP
Angptl4	0	0.605881	0.484	0.091	0	MALP
Dlc1	0	0.605814	0.86	0.51	0	MALP
Phlda3	0	0.605204	0.891	0.548	0	MALP
Adipor2	0	0.604562	0.719	0.398	0	MALP
Ar	0	0.593813	0.594	0.127	0	MALP
Ak3	0	0.591634	0.703	0.303	0	MALP
Gja1	0	0.590146	0.884	0.609	0	MALP
Cp	0	0.588221	0.639	0.175	0	MALP
Maf	0	0.584425	0.858	0.455	0	MALP
Antxr1	0	0.583443	0.73	0.347	0	MALP
Bst2	0	0.575219	0.846	0.561	0	MALP
Tpm1	0	0.572016	0.95	0.739	0	MALP
Emb	0	0.571991	0.677	0.308	0	MALP
Hspb1	0	0.56811	0.62	0.259	0	MALP
Tuba1c	0	0.56796	0.865	0.55	0	MALP
Cygb	0	0.563264	0.445	0.042	0	MALP
Mgmt	0	0.561169	0.736	0.317	0	MALP
Cyr61	0	0.556558	0.921	0.66	0	MALP
Tagln	0	0.556436	0.618	0.287	0	MALP
Clec2d	0	0.555493	0.555	0.111	0	MALP
Pdgfrb	0	0.552977	0.678	0.258	0	MALP
Nedd4	0	0.55099	0.985	0.694	0	MALP
Abi3bp	0	0.547858	0.422	0.036	0	MALP
Mpc2	0	0.547403	0.888	0.609	0	MALP
Cavin1	0	0.546712	0.826	0.449	0	MALP
Col4a2	0	0.545701	0.577	0.115	0	MALP
Bmp4	0	0.544819	0.505	0.199	0	MALP
Slc1a5	0	0.543833	0.589	0.223	0	MALP
Fhl2	0	0.543494	0.69	0.319	0	MALP
Rhoj	0	0.541232	0.641	0.174	0	MALP
S100a11	0	0.540574	0.986	0.815	0	MALP
Agt	0	0.537224	0.615	0.287	0	MALP
Ccser2	0	0.537099	0.709	0.337	0	MALP
Gpx8	0	0.533244	0.957	0.643	0	MALP
Lima1	0	0.528035	0.767	0.392	0	MALP
Fgfrl1	0	0.527424	0.562	0.124	0	MALP
Phldb2	0	0.526978	0.614	0.176	0	MALP
Abhd5	0	0.52571	0.67	0.375	0	MALP
Deptor	0	0.525402	0.53	0.121	0	MALP
Ackr4	0	0.521962	0.509	0.143	0	MALP
Net1	0	0.521034	0.564	0.174	0	MALP
Ndufa4	0	0.520298	0.972	0.798	0	MALP
Slfn5	0	0.52029	0.566	0.11	0	MALP
Ctgf	0	0.518461	0.719	0.48	0	MALP
Egr3	0	0.517803	0.522	0.19	0	MALP
Nnmt	0	0.516073	0.568	0.195	0	MALP
Zc2hc1a	0	0.515508	0.602	0.209	0	MALP
Tpm2	0	0.510972	0.766	0.492	0	MALP
Tln2	0	0.510632	0.571	0.14	0	MALP
Wnt4	0	0.509734	0.413	0.14	0	MALP
Amotl2	0	0.507673	0.754	0.418	0	MALP
Ehd2	0	0.506287	0.615	0.207	0	MALP
Echs1	0	0.505161	0.734	0.36	0	MALP
Prkar2b	0	0.503405	0.56	0.167	0	MALP
Dpysl3	0	0.503242	0.681	0.424	0	MALP
Rbms3	0	0.502798	0.678	0.301	0	MALP
Akap12	0	0.501869	0.514	0.101	0	MALP
Aplp2	0	0.500657	0.923	0.714	0	MALP
S100a13	0	0.499101	0.901	0.647	0	MALP
Id3	0	0.498068	0.994	0.846	0	MALP
Sod3	0	0.496315	0.572	0.159	0	MALP
Lpp	0	0.493773	0.877	0.566	0	MALP
Fhl1	0	0.493487	0.57	0.204	0	MALP
Aoc3	0	0.492191	0.424	0.07	0	MALP
Clmp	0	0.491862	0.621	0.241	0	MALP
Ifi27	0	0.489834	0.82	0.509	0	MALP
Smoc1	0	0.489418	0.416	0.026	0	MALP
Scd1	0	0.488995	0.613	0.468	0	MALP
Fah	0	0.488868	0.614	0.218	0	MALP
Ier2	0	0.487133	0.899	0.708	0	MALP
Zfp36l1	0	0.486762	0.934	0.69	0	MALP
Ehd3	0	0.484437	0.694	0.387	0	MALP
Npr3	0	0.484127	0.361	0.028	0	MALP
Adgrf5	0	0.482884	0.622	0.237	0	MALP
Zbtb20	0	0.480906	0.873	0.594	0	MALP
Ggt5	0	0.478368	0.475	0.043	0	MALP
Cited2	0	0.477006	0.827	0.6	0	MALP
G0s2	0	0.475942	0.342	0.046	0	MALP
Shc1	0	0.475762	0.734	0.378	0	MALP
Ndrg2	0	0.475157	0.641	0.319	0	MALP
Rab9	0	0.468343	0.733	0.4	0	MALP
Mxd4	0	0.467227	0.879	0.611	0	MALP
Tmed5	0	0.466626	0.761	0.442	0	MALP
Acta2	0	0.466325	0.622	0.402	0	MALP
Pgrmc1	0	0.461544	0.881	0.609	0	MALP
Hmgn3	0	0.46133	0.738	0.437	0	MALP
Rgs3	0	0.459671	0.881	0.59	0	MALP
Anxa1	0	0.459573	0.938	0.709	0	MALP
Rspo2	0	0.459115	0.46	0.093	0	MALP
Lhfp	0	0.459032	0.835	0.543	0	MALP
St3gal6	0	0.457806	0.665	0.339	0	MALP
2023-09-11	0	0.456675	0.861	0.6	0	MALP
Lpgat1	0	0.456639	0.669	0.336	0	MALP
Btg2	0	0.454945	0.942	0.688	0	MALP
Fzd1	0	0.454294	0.525	0.192	0	MALP
Mmd	0	0.453758	0.515	0.142	0	MALP
Nid1	0	0.453615	0.48	0.094	0	MALP
Mrap	0	0.452067	0.289	0.036	0	MALP
Olfml2b	0	0.451916	0.584	0.245	0	MALP
Trabd2b	0	0.451271	0.455	0.047	0	MALP
St6galnac2	0	0.450534	0.377	0.026	0	MALP
Umad1	0	0.449201	0.468	0.07	0	MALP
Tmod3	0	0.44857	0.758	0.45	0	MALP
Prss23	0	0.448317	0.589	0.246	0	MALP
Ism1	0	0.447812	0.38	0.031	0	MALP
Mycbp2	0	0.447487	0.758	0.491	0	MALP
Irx3	0	0.447108	0.678	0.413	0	MALP
Pten	0	0.445383	0.862	0.592	0	MALP
Cnn2	0	0.44453	0.856	0.613	0	MALP
Vcl	0	0.444439	0.797	0.475	0	MALP
Zeb2	0	0.441417	0.947	0.7	0	MALP
Rgcc	0	0.44035	0.819	0.593	0	MALP
Fzd4	0	0.439252	0.381	0.036	0	MALP
Ifitm3	0	0.436433	0.956	0.771	0	MALP
Thra	0	0.435851	0.679	0.335	0	MALP
Mocs2	0	0.435757	0.761	0.456	0	MALP
Csad	0	0.434521	0.54	0.183	0	MALP
Etfb	0	0.434419	0.861	0.604	0	MALP
Ddt	0	0.432911	0.771	0.489	0	MALP
H2afv	0	0.432056	0.819	0.5	0	MALP
Pdlim1	0	0.431983	0.506	0.171	0	MALP
S100a16	0	0.430848	0.744	0.431	0	MALP
Pdgfra	0	0.430827	0.607	0.299	0	MALP
Hmgn1	0	0.430483	0.956	0.727	0	MALP
Gprin3	0	0.430383	0.439	0.077	0	MALP
Igsf3	0	0.429964	0.553	0.251	0	MALP
Ptx3	0	0.425825	0.511	0.202	0	MALP
Cldn10	0	0.425298	0.357	0.067	0	MALP
Col6a1	0	0.424756	0.855	0.566	0	MALP
Rasgrp2	0	0.424125	0.584	0.227	0	MALP
Tead1	0	0.423896	0.678	0.347	0	MALP
Atp13a3	0	0.423597	0.705	0.412	0	MALP
Adamts5	0	0.423212	0.485	0.21	0	MALP
Ptprd	0	0.422562	0.801	0.503	0	MALP
Dusp5	0	0.422037	0.492	0.194	0	MALP
Ech1	0	0.421246	0.752	0.465	0	MALP
Tgfb1i1	0	0.418673	0.655	0.311	0	MALP
Zcchc24	0	0.416615	0.599	0.24	0	MALP
Ncoa7	0	0.41647	0.544	0.19	0	MALP
Rnf125	0	0.416464	0.423	0.096	0	MALP
Fbn1	0	0.414182	0.541	0.194	0	MALP
Adamts9	0	0.409281	0.491	0.189	0	MALP
Ldhb	0	0.40915	0.529	0.202	0	MALP
Myl12a	0	0.408748	0.981	0.843	0	MALP
Selenop	0	0.408453	0.886	0.613	0	MALP
Zfp36l2	0	0.40759	0.802	0.54	0	MALP
Apbb2	0	0.406994	0.667	0.356	0	MALP
Irs1	0	0.406793	0.71	0.426	0	MALP
Plekhh2	0	0.402696	0.507	0.172	0	MALP
Sox4	0	0.401517	0.709	0.472	0	MALP
Tnfrsf1a	0	0.400641	0.766	0.484	0	MALP
Lamb1	0	0.400347	0.466	0.118	0	MALP
Rbms1	0	0.399127	0.897	0.676	0	MALP
Cebpd	0	0.397708	0.691	0.449	0	MALP
Ginm1	0	0.394678	0.666	0.392	0	MALP
Ptms	0	0.393877	0.947	0.77	0	MALP
Eva1b	0	0.393818	0.759	0.49	0	MALP
Sptbn1	0	0.391996	0.743	0.503	0	MALP
Runx1	0	0.391903	0.873	0.657	0	MALP
Id1	0	0.390279	0.541	0.336	0	MALP
Map1lc3a	0	0.389255	0.903	0.688	0	MALP
Myadm	0	0.389137	0.741	0.446	0	MALP
Itih5	0	0.388193	0.26	0.01	0	MALP
Plxnd1	0	0.387973	0.561	0.181	0	MALP
Six1	0	0.387349	0.491	0.172	0	MALP
Tns3	0	0.387101	0.768	0.523	0	MALP
Anxa6	0	0.386543	0.798	0.537	0	MALP
Trf	0	0.386132	0.284	0.115	0	MALP
Fcgrt	0	0.385172	0.819	0.559	0	MALP
Prrx1	0	0.384302	0.819	0.532	0	MALP
Fat1	0	0.384281	0.9	0.639	0	MALP
Adh1	0	0.384239	0.329	0.019	0	MALP
Parva	0	0.383543	0.72	0.432	0	MALP
Gatb	0	0.382515	0.411	0.061	0	MALP
Rai14	0	0.380829	0.602	0.342	0	MALP
Myl12b	0	0.379622	0.789	0.536	0	MALP
Wisp2	0	0.378475	0.418	0.187	0	MALP
Dnaja1	0	0.377332	0.894	0.689	0	MALP
Tnrc18	0	0.376578	0.64	0.35	0	MALP
Emp2	0	0.37608	0.673	0.437	0	MALP
Rbbp7	0	0.376069	0.724	0.438	0	MALP
Ctdspl	0	0.375339	0.581	0.296	0	MALP
Ifngr1	0	0.374453	0.737	0.507	0	MALP
Pla2g16	0	0.373541	0.573	0.287	0	MALP
Scara3	0	0.372668	0.451	0.128	0	MALP
Dlg5	0	0.37202	0.489	0.17	0	MALP
Dstn	0	0.371353	0.966	0.808	0	MALP
Fermt2	0	0.370152	0.806	0.532	0	MALP
Oat	0	0.368218	0.879	0.65	0	MALP
Ap3s1	0	0.367975	0.886	0.682	0	MALP
Sorbs2	0	0.366582	0.566	0.312	0	MALP
Emp1	0	0.365378	0.833	0.633	0	MALP
Ywhaq	0	0.364935	0.934	0.755	0	MALP
Echdc2	0	0.364029	0.443	0.119	0	MALP
Mme	0	0.363443	0.552	0.287	0	MALP
Ndufs4	0	0.363293	0.876	0.65	0	MALP
Eif4a2	0	0.363104	0.865	0.638	0	MALP
Smad6	0	0.362742	0.591	0.319	0	MALP
Lap3	0	0.362085	0.699	0.439	0	MALP
Rasl11a	0	0.361706	0.498	0.259	0	MALP
Mprip	0	0.36132	0.793	0.544	0	MALP
Cnn3	0	0.361293	0.709	0.426	0	MALP
Vgll3	0	0.361138	0.518	0.191	0	MALP
Wdr86	0	0.360936	0.314	0.008	0	MALP
S100b	0	0.359276	0.338	0.084	0	MALP
Slc1a3	0	0.359175	0.298	0.045	0	MALP
Arhgap29	0	0.358896	0.485	0.221	0	MALP
Ctnnbip1	0	0.35868	0.61	0.353	0	MALP
Gm4951	0	0.358288	0.312	0.015	0	MALP
Dnajb1	0	0.358207	0.652	0.47	0	MALP
Lims1	0	0.357522	0.757	0.486	0	MALP
[truncated: 4,677 more rows]

## Sheet: Supplementary File 1b
Gene	avg_log2FC	p_val	p_val_adj	pct.1	pct.2
Ero1l	-2.1	0	0	0.69	0.972
Fabp5	-1.67	0	0	0.54	0.802
Lgals3	-1.52	0	0	0.699	0.933
Gapdh	-1.49	0	0	0.987	0.996
Bnip3	-1.48	0	0	0.878	0.992
Ndrg1	-1.47	0	0	0.853	0.973
Egln3	-1.47	0	0	0.272	0.846
Car12	-1.32	0	0	0.661	0.831
Fam162a	-1.29	0	0	0.94	0.99
Egln1	-1.25	0	0	0.818	0.968
Adm	-1.22	0	0	0.178	0.622
P4ha2	-1.2	0	0	0.887	0.984
Pgk1	-1.19	0	0	0.966	0.998
Mif	-1.16	0	0	0.992	0.999
Slc2a1	-1.16	0	0	0.486	0.89
Aldoa	-1.11	0	0	0.986	0.997
P4ha1	-1.1	0	0	0.953	0.994
Scd2	-1.09	0	0	0.778	0.958
Slc16a3	-1.04	0	0	0.705	0.964
Eif4ebp1	-1.03	0	0	0.897	0.968
Pgam1	-1.02	0	0	0.979	0.995
Tpi1	-0.99	0	0	0.968	0.996
Mt1	-0.99	0	0	0.928	0.978
Cox4i2	-0.98	0	0	0.732	0.944
Hsp90b1	-0.97	0	0	0.973	0.993
Higd1a	-0.94	0	0	0.989	0.997
Baiap2l2	-0.92	0	0	0.245	0.736
Col12a1	-0.92	0	0	0.391	0.653
Zfp395	-0.9	0	0	0.25	0.704
Col5a1	-0.9	0	0	0.986	0.997
Ankrd37	-0.89	0	0	0.341	0.722
Nrbf2	-0.88	0	0	0.728	0.894
Ddit3	-0.88	0	0	0.532	0.806
Bsg	-0.88	0	0	0.998	0.999
Gys1	-0.88	0	0	0.276	0.751
Trib3	-0.87	0	0	0.131	0.616
Adm2	-0.85	0	0	0.331	0.732
Cd200	-0.84	0	0	0.919	0.974
Col3a1	-0.84	0	0	0.352	0.563
H2-Q7	-0.83	0	0	0.712	0.886
Ctsa	-0.83	0	0	0.927	0.967
Hspb7	-0.82	0	0	0.683	0.87
Pfkp	-0.81	0	0	0.303	0.758
Gbe1	-0.8	0	0	0.383	0.769
P4hb	-0.8	0	0	0.992	0.997
Tnn	-0.8	0	0	0.3	0.604
Prelid2	-0.79	0	0	0.355	0.76
Slc27a3	-0.77	0	0	0.372	0.719
Vwa1	-0.77	0	0	0.069	0.543
Loxl2	-0.77	0	0	0.857	0.956
Gpi1	-0.76	0	0	0.899	0.974
Galk1	-0.76	0	0	0.856	0.952
Eno2	-0.76	0	0	0.113	0.556
Bnip3l	-0.76	0	0	0.902	0.956
Rgs3	-0.75	0	0	0.842	0.906
Cyb5r1	-0.75	0	0	0.375	0.686
Eno1	-0.75	0	0	0.714	0.86
Pgm2	-0.75	0	0	0.539	0.844
Vdac1	-0.73	0	0	0.838	0.914
2310022B05Rik	-0.73	0	0	0.902	0.963
Ddit4l	-0.73	0	0	0.347	0.564
Selenbp1	-0.72	0	0	0.425	0.736
Rtkn2	-0.72	0	0	0.097	0.547
Pgp	-0.71	0	0	0.649	0.83
Col15a1	-0.7	0	0	0.201	0.562
Fmod	-0.7	0	0	0.565	0.727
Tmem45a	-0.69	0	0	0.744	0.906
Ndrg2	-0.68	0	0	0.371	0.75
Lox	-0.68	0	0	0.999	0.999
Bmp2	-0.67	0	0	0.408	0.626
Gng11	-0.67	0	0	0.739	0.856
Pafah1b3	-0.67	0	0	0.523	0.809
Anxa2	-0.67	0	0	0.952	0.971
H19	-0.67	3.38e-185	7.38e-181	0.074	0.218
Megf6	-0.67	0	0	0.231	0.622
H2-Ab1	-0.65	0	0	0.263	0.519
Tmem119	-0.64	3.54e-145	7.73e-141	0.81	0.828
Rpl10a	-0.64	0	0	0.996	0.997
Swap70	-0.64	0	0	0.732	0.887
Fxyd5	-0.63	0	0	0.592	0.784
Hspa9	-0.62	0	0	0.837	0.926
Fau	-0.62	0	0	1	1
Atp6v1g1	-0.61	0	0	0.98	0.988
Eif1b	-0.61	0	0	0.719	0.823
Apln	-0.61	0	0	0.28	0.634
Vim	-0.61	0	0	0.97	0.985
Ndufv3	-0.6	0	0	0.95	0.978
Rnf126	-0.6	0	0	0.477	0.745
Rps5	-0.59	0	0	0.999	0.999
Cspg4	-0.59	0	0	0.514	0.724
Ldha	-0.59	0	0	0.998	0.999
Eid1	-0.59	0	0	0.829	0.902
Zfp365	-0.59	0	0	0.275	0.627
Pfkl	-0.59	0	0	0.672	0.861
Rpl22l1	-0.58	0	0	0.982	0.988
Sars	-0.58	0	0	0.792	0.916
Mgarp	-0.58	0	0	0.316	0.693
Grb10	-0.58	0	0	0.766	0.877
Cdsn	-0.58	0	0	0.097	0.341
P3h2	-0.58	0	0	0.128	0.522
Hk1	-0.57	0	0	0.587	0.796
Rpl28	-0.57	0	0	0.997	0.999
Postn	-0.57	2.97e-147	6.48e-143	0.343	0.486
Rbp4	-0.57	0	0	0.579	0.769
Rnf19a	-0.57	0	0	0.536	0.718
Car9	-0.56	0	0	0.069	0.295
Tubb5	-0.56	2.69e-257	5.87e-253	0.868	0.917
Rps24	-0.56	0	0	0.998	1
Ncf1	-0.56	0	0	0.677	0.837
Timp3	-0.56	2.68e-43	5.85e-39	0.398	0.459
Actg1	-0.55	0	0	0.995	0.997
Emp2	-0.55	0	0	0.466	0.675
Kit	-0.54	0	0	0.16	0.48
Pik3ip1	-0.54	0	0	0.595	0.787
Sp7	-0.54	0	0	0.633	0.788
Soat1	-0.53	0	0	0.361	0.653
Ndufa4l2	-0.53	0	0	0.806	0.979
Mthfd1l	-0.53	0	0	0.362	0.66
H2-T23	-0.53	0	0	0.453	0.721
Hilpda	-0.53	0	0	0.586	0.752
Eif4b	-0.53	0	0	0.703	0.867
Prelid1	-0.53	0	0	0.934	0.96
Rps4x	-0.52	0	0	0.998	0.999
Rplp1	-0.52	0	0	1	1
Rpl3	-0.52	0	0	0.993	0.996
Fermt2	-0.52	0	0	0.738	0.83
Gdf15	-0.52	0	0	0.251	0.543
Bicc1	-0.52	0	0	0.949	0.962
Rhobtb1	-0.52	0	0	0.295	0.56
Ncam1	-0.52	0	0	0.664	0.796
Rpsa	-0.52	0	0	1	1
Nexn	-0.51	0	0	0.489	0.691
Eef2	-0.51	0	0	0.995	0.998
Sap30	-0.51	0	0	0.218	0.533
Fibin	-0.51	1.48e-232	3.22e-228	0.458	0.606
Mgll	-0.51	6.78e-219	1.48e-214	0.384	0.558
Syce2	-0.51	0	0	0.244	0.597
Pfkfb3	-0.5	0	0	0.323	0.58
Dnajb4	-0.5	0	0	0.604	0.745
Rcor2	-0.5	0	0	0.65	0.797
Ptges3l	-0.5	0	0	0.595	0.784
Pck2	-0.5	0	0	0.683	0.857
Col6a2	-0.5	1.92e-296	4.2e-292	0.503	0.677
Plpp1	-0.49	7.91e-107	1.73e-102	0.495	0.582
Vegfa	-0.49	0	0	0.934	0.968
Rnf217	-0.49	0	0	0.257	0.537
Rpl18a	-0.49	0	0	0.999	1
Pkm	-0.49	0	0	0.995	0.999
Rpl14	-0.49	0	0	0.998	0.999
Me1	-0.49	0	0	0.771	0.857
Smim5	-0.49	0	0	0.204	0.458
Spg21	-0.48	0	0	0.465	0.69
Hspa5	-0.48	8.58e-226	1.87e-221	0.986	0.982
Pmp22	-0.48	2.03e-300	4.43e-296	0.525	0.693
Loxl4	-0.48	2.83e-199	6.17e-195	0.546	0.658
Nampt	-0.48	0	0	0.461	0.718
Stc2	-0.48	0	0	0.558	0.75
Calr	-0.48	0	0	0.986	0.984
Rps2	-0.47	0	0	0.998	0.996
Col6a1	-0.47	2.16e-245	4.72e-241	0.682	0.797
Slc3a2	-0.47	0	0	0.892	0.914
Pygl	-0.47	0	0	0.215	0.576
Rps26	-0.47	0	0	0.996	0.999
Fkbp10	-0.47	0	0	0.976	0.989
Lonp1	-0.46	0	0	0.466	0.703
Rps16	-0.46	0	0	0.999	0.999
Gcnt1	-0.46	2.34e-289	5.11e-285	0.488	0.654
Cavin3	-0.46	0	0	0.689	0.818
Snta1	-0.46	0	0	0.78	0.864
Wtip	-0.45	0	0	0.569	0.719
Rala	-0.45	0	0	0.753	0.85
Rps20	-0.45	0	0	0.998	0.999
Aldoc	-0.45	0	0	0.432	0.697
Fam214a	-0.45	2.16e-221	4.71e-217	0.58	0.699
1700003F12Rik	-0.44	0	0	0.495	0.698
Insig2	-0.44	0	0	0.909	0.94
Rpl22	-0.44	0	0	0.991	0.994
Timp1	-0.44	2.99e-235	6.52e-231	0.993	0.997
Hspa1a	-0.44	8.9e-72	1.94e-67	0.268	0.362
Rplp0	-0.44	0	0	0.999	0.999
Jmjd6	-0.44	0	0	0.391	0.647
Malat1	-0.44	1.47e-58	3.22e-54	0.999	0.999
Lars2	-0.43	2.41e-183	5.26e-179	0.714	0.813
Asph	-0.43	0	0	0.483	0.694
Mt2	-0.43	4.53e-64	9.89e-60	0.569	0.665
Hikeshi	-0.43	0	0	0.591	0.723
Fam117b	-0.43	0	0	0.372	0.57
Nrn1	-0.43	1.59e-201	3.47e-197	0.092	0.243
Selenow	-0.43	0	0	0.716	0.837
Gtf2e2	-0.43	0	0	0.48	0.684
Pttg1ip	-0.43	0	0	0.695	0.829
Mthfd2	-0.42	0	0	0.701	0.841
Gtf2i	-0.42	0	0	0.868	0.915
Phlda1	-0.42	5.38e-179	1.17e-174	0.549	0.687
Pcgf5	-0.42	0	0	0.354	0.595
Ghitm	-0.42	0	0	0.869	0.914
Mef2c	-0.42	0	0	0.993	0.995
Pdia6	-0.42	5.27e-276	1.15e-271	0.87	0.909
Kdelr3	-0.42	0	0	0.946	0.965
Isg15	-0.41	1.97e-99	4.3e-95	0.201	0.314
Aebp1	-0.41	1.35e-262	2.94e-258	0.528	0.695
Creb3l1	-0.41	1.59e-307	3.47e-303	0.984	0.991
Tbl2	-0.41	0	0	0.359	0.6
Arrb1	-0.41	0	0	0.175	0.485
Plekha2	-0.41	0	0	0.209	0.517
Rps3	-0.41	0	0	0.997	0.998
Hspb11	-0.4	0	0	0.434	0.651
Raph1	-0.4	2.12e-96	4.63e-92	0.676	0.72
Prss35	-0.4	2.33e-235	5.08e-231	0.555	0.734
Lxn	-0.4	0	0	0.323	0.55
Grhpr	-0.4	0	0	0.583	0.763
H2-Q6	-0.4	2.49e-244	5.44e-240	0.443	0.608
Rpl29	-0.4	5.05e-106	1.1e-101	0.886	0.907
Stx4a	-0.4	0	0	0.442	0.664
Rps12	-0.4	0	0	0.999	1
Fyttd1	-0.39	1.23e-289	2.68e-285	0.643	0.758
Rgs16	-0.39	2.67e-212	5.84e-208	0.158	0.331
Ak4	-0.39	0	0	0.256	0.537
Pdk1	-0.39	0	0	0.529	0.724
Rpl27a	-0.39	0	0	1	1
Bri3	-0.39	0	0	0.928	0.942
Aldh1l2	-0.39	3.67e-281	8.01e-277	0.651	0.79
Rpl30	-0.39	0	0	0.997	0.997
Gadd45gip1	-0.39	0	0	0.453	0.651
Eef1b2	-0.38	0	0	0.993	0.995
Prkcsh	-0.38	5.68e-290	1.24e-285	0.757	0.846
Mfge8	-0.38	1.02e-255	2.23e-251	0.686	0.788
Cep170	-0.38	0	0	0.283	0.54
Cited2	-0.38	1.31e-131	2.87e-127	0.613	0.702
Selenom	-0.38	4.71e-276	1.03e-271	0.94	0.955
Dcaf4	-0.38	9.55e-243	2.09e-238	0.534	0.69
Egr1	-0.38	5.99e-134	1.31e-129	0.61	0.711
Rps18	-0.38	1.42e-284	3.09e-280	0.994	0.993
Arhgdia	-0.38	0	0	0.875	0.924
Tet3	-0.37	0	0	0.337	0.554
Dkk1	-0.37	2.05e-110	4.47e-106	0.161	0.279
Rps3a1	-0.37	0	0	0.998	0.998
Plxnb2	-0.37	1.13e-224	2.47e-220	0.641	0.746
Tap1	-0.37	0	0	0.285	0.515
Eef1a1	-0.37	0	0	1	0.999
Cd47	-0.37	0	0	0.852	0.89
Asrgl1	-0.37	6.63e-231	1.45e-226	0.338	0.513
Rpl24	-0.37	0	0	0.999	0.998
Klf2	-0.37	4.33e-128	9.46e-124	0.337	0.466
Rps10	-0.37	0	0	0.999	0.999
Rack1	-0.37	0	0	0.996	0.998
Hes6	-0.37	0	0	0.334	0.561
Rpl21	-0.37	0	0	0.994	0.994
2700038G22Rik	-0.36	5.45e-36	1.19e-31	0.309	0.367
Clcn3	-0.36	2.29e-293	5.01e-289	0.298	0.51
Rpl35a	-0.36	0	0	0.998	0.999
Edem1	-0.36	2.38e-287	5.19e-283	0.681	0.797
Hcfc1r1	-0.36	2.63e-258	5.73e-254	0.862	0.907
Lrrc42	-0.36	5.11e-298	1.12e-293	0.265	0.474
Rpl7	-0.36	0	0	0.999	0.997
Tmem189	-0.36	1.52e-254	3.31e-250	0.557	0.691
R3hdm1	-0.36	6.81e-293	1.49e-288	0.579	0.721
Espn	-0.36	0	0	0.026	0.234
Psap	-0.36	5.05e-178	1.1e-173	0.957	0.961
Rpl23	-0.36	0	0	1	1
Npepps	-0.36	1.32e-300	2.88e-296	0.435	0.631
Npm1	-0.35	0	0	0.988	0.989
Atg3	-0.35	8.03e-207	1.75e-202	0.677	0.764
Ssr2	-0.35	3.51e-189	7.67e-185	0.955	0.955
Pdlim5	-0.35	2.57e-90	5.62e-86	0.688	0.724
Dnajc5	-0.35	9.73e-267	2.13e-262	0.596	0.726
Rps8	-0.35	0	0	1	1
mt-Co1	-0.35	1.62e-100	3.54e-96	1	0.999
Adamtsl5	-0.35	0	0	0.104	0.393
Ywhah	-0.35	1.62e-262	3.54e-258	0.471	0.64
Wif1	-0.35	3.52e-233	7.67e-229	0.737	0.841
Cd81	-0.35	0	0	0.99	0.988
Ccdc58	-0.35	0	0	0.355	0.584
Mrpl17	-0.35	3.44e-278	7.51e-274	0.782	0.857
Jam2	-0.35	5.6e-202	1.22e-197	0.445	0.593
Selenoh	-0.35	1.45e-270	3.16e-266	0.525	0.692
Rps23	-0.35	0	0	0.999	0.999
Tcp1	-0.35	0	0	0.882	0.921
Alpl	-0.35	0	0	0.999	0.998
Rpl10	-0.34	2.59e-299	5.66e-295	0.993	0.992
Efemp2	-0.34	9.83e-277	2.15e-272	0.891	0.925
Eif1	-0.34	0	0	0.998	0.999
Rps19	-0.34	0	0	0.998	0.999
Hif1a	-0.34	3.76e-142	8.2e-138	0.876	0.888
C1qtnf12	-0.34	6.85e-47	1.5e-42	0.354	0.421
Vkorc1	-0.34	2.96e-260	6.46e-256	0.946	0.966
Inhba	-0.34	1.5e-176	3.28e-172	0.186	0.34
Rbpj	-0.34	4.67e-208	1.02e-203	0.522	0.653
Canx	-0.34	1.57e-298	3.43e-294	0.908	0.94
Myo1b	-0.34	2.22e-208	4.86e-204	0.899	0.926
Cdk4	-0.34	7.73e-286	1.69e-281	0.71	0.813
Seh1l	-0.34	0	0	0.354	0.564
Plekho1	-0.34	1.86e-263	4.06e-259	0.39	0.576
Plod1	-0.34	1.96e-213	4.29e-209	0.724	0.796
Acta2	-0.34	0.0473053	1	0.344	0.337
Psmb9	-0.34	1.01e-295	2.21e-291	0.291	0.51
Kcmf1	-0.33	8.67e-263	1.89e-258	0.702	0.795
Rps9	-0.33	0	0	0.998	0.998
Ccng2	-0.33	2.57e-306	5.6e-302	0.21	0.431
Npc2	-0.33	0	0	0.984	0.985
Tkt	-0.33	1.65e-255	3.61e-251	0.736	0.832
Chac1	-0.33	1.07e-241	2.33e-237	0.228	0.424
Endog	-0.33	1.04e-300	2.26e-296	0.442	0.634
Ubxn1	-0.33	7.61e-282	1.66e-277	0.741	0.831
Stc1	-0.33	0	0	0.049	0.324
Rpl32	-0.33	0	0	0.999	0.999
Scpep1	-0.33	6.07e-290	1.33e-285	0.612	0.753
Magt1	-0.32	4.87e-204	1.06e-199	0.59	0.708
Mcrip1	-0.32	3.12e-234	6.82e-230	0.758	0.839
Id2	-0.32	8.46e-157	1.85e-152	0.699	0.796
Nsa2	-0.32	1.86e-241	4.06e-237	0.821	0.87
Neurl2	-0.32	0	0	0.208	0.471
Rpl5	-0.32	0	0	0.994	0.995
Trmt112	-0.32	5.18e-253	1.13e-248	0.763	0.841
Picalm	-0.32	3.4e-201	7.41e-197	0.855	0.896
Smtnl2	-0.32	0	0	0.054	0.349
Rpl17	-0.32	0	0	0.996	0.996
Rplp2	-0.32	0	0	0.999	0.999
Cd44	-0.32	7.28e-57	1.59e-52	0.559	0.604
Atp5g2	-0.32	0	0	0.986	0.98
Clta	-0.32	0	0	0.966	0.964
Camk2d	-0.31	3.6e-160	7.87e-156	0.718	0.781
Dek	-0.31	1.32e-95	2.87e-91	0.836	0.845
Mapk3	-0.31	9.06e-231	1.98e-226	0.482	0.639
Sel1l	-0.31	5.08e-193	1.11e-188	0.499	0.63
Rps27a	-0.31	0	0	0.999	0.999
Rps15a	-0.31	0	0	0.998	0.998
Id1	-0.31	1.73e-64	3.78e-60	0.41	0.498
Setd5	-0.31	9.68e-202	2.11e-197	0.494	0.638
Lrrfip2	-0.31	4.82e-175	1.05e-170	0.697	0.767
Pla2g4a	-0.31	1.38e-185	3.02e-181	0.512	0.642
Dnajc21	-0.31	3.96e-239	8.65e-235	0.522	0.664
Wls	-0.31	1.46e-176	3.19e-172	0.819	0.866
Emp3	-0.31	3.97e-139	8.67e-135	0.92	0.934
Snhg12	-0.31	1.05e-197	2.3e-193	0.443	0.602
Rpl13	-0.31	0	0	1	1
Susd5	-0.31	6.34e-253	1.38e-248	0.181	0.381
Plp2	-0.31	1.47e-186	3.21e-182	0.39	0.54
Tpm2	-0.3	1.22e-132	2.67e-128	0.461	0.599
Agpat5	-0.3	3.28e-229	7.17e-225	0.529	0.675
Isg20	-0.3	3.31e-269	7.22e-265	0.248	0.45
Slc25a1	-0.3	3.47e-210	7.57e-206	0.681	0.785
Stt3b	-0.3	1.62e-218	3.53e-214	0.632	0.743
Usf2	-0.3	2.52e-216	5.51e-212	0.653	0.765
Cda	-0.3	0	0	0.112	0.362
Gm10827	-0.3	8.42e-55	1.84e-50	0.069	0.134
Rps14	-0.3	0	0	0.999	0.999
Snrpa1	-0.3	2.43e-150	5.32e-146	0.643	0.719
Vapa	-0.3	2.46e-233	5.38e-229	0.933	0.936
Vldlr	-0.3	1.7e-194	3.71e-190	0.921	0.948
Lman2	-0.3	3.25e-228	7.11e-224	0.767	0.829
Ptgfrn	-0.29	6.29e-176	1.37e-171	0.367	0.515
Zfp292	-0.29	1.26e-124	2.74e-120	0.597	0.688
Rpl36a	-0.29	7.89e-281	1.72e-276	0.993	0.993
Tgfb1i1	-0.29	3.23e-248	7.05e-244	0.161	0.353
Xist	-0.29	2.37e-07	0.00517873	0.363	0.382
Atp6v0b	-0.29	1.12e-251	2.44e-247	0.957	0.953
Cops4	-0.29	2.85e-167	6.22e-163	0.755	0.809
Trappc6a	-0.29	2.83e-222	6.17e-218	0.733	0.817
Angptl6	-0.29	0	0	0.065	0.326
Arhgap29	-0.29	9.59e-274	2.09e-269	0.208	0.415
Lbh	-0.29	1.52e-74	3.31e-70	0.71	0.741
Mindy2	-0.29	9.68e-159	2.11e-154	0.57	0.678
Ddah1	-0.29	0	0	0.212	0.448
Loxl3	-0.29	6.55e-153	1.43e-148	0.425	0.566
Rabac1	-0.29	4.65e-243	1.01e-238	0.98	0.983
Mapk1	-0.29	1.03e-170	2.24e-166	0.669	0.748
Rpl11	-0.29	0	0	0.999	0.998
Sap18	-0.29	9.05e-124	1.98e-119	0.692	0.734
Nisch	-0.29	2.01e-154	4.4e-150	0.852	0.891
Homer1	-0.29	1.3e-240	2.83e-236	0.287	0.478
Slc2a3	-0.29	0	0	0.062	0.28
Atf4	-0.29	7.14e-210	1.56e-205	0.961	0.973
Ppib	-0.28	1.24e-271	2.71e-267	0.99	0.99
Fndc3b	-0.28	4.7e-129	1.03e-124	0.948	0.954
0610012G03Rik	-0.28	6.13e-216	1.34e-211	0.757	0.82
Hspa1b	-0.28	1.9e-99	4.16e-95	0.135	0.246
Ccdc47	-0.28	1.68e-179	3.68e-175	0.606	0.706
Dyrk2	-0.28	2.58e-106	5.63e-102	0.624	0.698
Mxi1	-0.28	5.89e-169	1.28e-164	0.682	0.776
H2-Q10	-0.28	2.34e-274	5.12e-270	0.142	0.352
Olfml3	-0.28	1.98e-155	4.32e-151	0.891	0.932
Dap	-0.28	5.13e-218	1.12e-213	0.985	0.983
Bend5	-0.28	6.4e-296	1.4e-291	0.167	0.381
Cavin4	-0.28	1.51e-157	3.3e-153	0.162	0.31
Oxsr1	-0.28	2.09e-170	4.57e-166	0.491	0.624
Serpinb6a	-0.28	7.65e-125	1.67e-120	0.763	0.799
Ptgs2	-0.28	7.04e-71	1.54e-66	0.347	0.453
Ppme1	-0.28	2.07e-194	4.52e-190	0.518	0.652
Lyz2	-0.28	2e-05	0.436154	0.504	0.457
Sun1	-0.28	1.84e-238	4.01e-234	0.372	0.553
Ly6e	-0.28	5.71e-55	1.25e-50	0.516	0.574
Prdx4	-0.28	4.77e-189	1.04e-184	0.919	0.94
Shox2	-0.28	2.19e-52	4.79e-48	0.84	0.854
Emc10	-0.28	5.58e-225	1.22e-220	0.876	0.907
Fndc1	-0.28	0	0	0.033	0.262
Arhgap5	-0.28	2.48e-138	5.42e-134	0.695	0.76
Uhrf2	-0.28	4.57e-156	9.98e-152	0.473	0.603
Rpl15	-0.28	4.28e-306	9.35e-302	0.997	0.998
Ccdc80	-0.28	3.03e-115	6.62e-111	0.931	0.934
Rpl41	-0.28	0	0	1	1
Rcn3	-0.27	8.83e-206	1.93e-201	0.979	0.991
Spry1	-0.27	2.46e-153	5.37e-149	0.18	0.323
Ppp2r5a	-0.27	7.21e-144	1.57e-139	0.696	0.771
Igf1r	-0.27	4.49e-124	9.81e-120	0.755	0.812
Itm2a	-0.27	7.37e-87	1.61e-82	0.341	0.449
Slc43a2	-0.27	1.45e-107	3.17e-103	0.421	0.537
Mrpl14	-0.27	1.25e-191	2.72e-187	0.795	0.844
Mllt3	-0.27	0	0	0.139	0.368
Rp9	-0.27	1.84e-196	4.03e-192	0.519	0.652
Anp32b	-0.27	1.13e-145	2.47e-141	0.889	0.912
4931428F04Rik	-0.27	1.96e-294	4.27e-290	0.152	0.368
Rasa4	-0.27	7.32e-236	1.6e-231	0.295	0.488
Kank1	-0.27	1.17e-134	2.56e-130	0.435	0.552
Arhgef2	-0.27	1.11e-187	2.43e-183	0.384	0.55
Pla2g12a	-0.27	2.12e-181	4.62e-177	0.461	0.597
Appl2	-0.27	1.69e-214	3.69e-210	0.307	0.487
Aimp2	-0.27	6.41e-227	1.4e-222	0.328	0.514
Htra1	-0.27	1.55e-42	3.38e-38	0.646	0.653
Rpl34	-0.27	0	0	0.997	0.997
Tagln	-0.27	2.31e-27	5.04e-23	0.162	0.213
Eif3c	-0.27	5.26e-172	1.15e-167	0.955	0.961
Rbm5	-0.27	1.12e-195	2.44e-191	0.394	0.556
Cdc42ep3	-0.27	1.18e-24	2.57e-20	0.784	0.784
Serpine1	-0.27	1.99e-07	0.00433489	0.864	0.832
Rpl12	-0.27	8.41e-205	1.84e-200	0.994	0.995
Hapln1	-0.27	7.76e-84	1.69e-79	0.074	0.16
Rpl8	-0.26	0	0	1	0.999
Mapk6	-0.26	7.66e-97	1.67e-92	0.624	0.685
Dlx3	-0.26	3.24e-188	7.07e-184	0.186	0.353
Rps7	-0.26	6.89e-261	1.5e-256	0.995	0.995
H1f0	-0.26	1.29e-76	2.81e-72	0.706	0.762
Gpc1	-0.26	1.35e-124	2.94e-120	0.967	0.972
Lrrfip1	-0.26	2.52e-50	5.51e-46	0.719	0.721
Rfxap	-0.26	3.35e-163	7.31e-159	0.486	0.615
Rnase4	-0.26	2.87e-146	6.27e-142	0.389	0.531
Lama4	-0.26	7.05e-141	1.54e-136	0.255	0.394
Rab6a	-0.26	2.2e-154	4.8e-150	0.786	0.834
Vat1	-0.26	2.86e-173	6.24e-169	0.338	0.494
Snx21	-0.26	1.56e-252	3.41e-248	0.263	0.468
Myo1c	-0.26	1.75e-149	3.81e-145	0.489	0.609
Creld1	-0.26	2.7e-205	5.91e-201	0.447	0.611
Rabggtb	-0.26	1.13e-158	2.48e-154	0.592	0.69
Cnppd1	-0.26	3.35e-166	7.31e-162	0.627	0.735
Fam114a2	-0.26	1.3e-160	2.84e-156	0.717	0.775
Trabd	-0.26	2.25e-195	4.9e-191	0.386	0.545
Mmp2	-0.26	3.94e-144	8.6e-140	0.868	0.921
Prrx2	-0.26	8.55e-172	1.87e-167	0.232	0.393
Suz12	-0.26	2.78e-174	6.06e-170	0.411	0.557
Rpl6	-0.26	0	0	0.998	0.998
Tex264	-0.26	8.11e-173	1.77e-168	0.744	0.805
Erp29	-0.26	1.12e-180	2.44e-176	0.966	0.97
Cdo1	-0.26	1.66e-63	3.62e-59	0.734	0.766
Acbd6	-0.26	3.53e-213	7.7e-209	0.51	0.661
Ctnnd1	-0.25	4.82e-103	1.05e-98	0.561	0.643
Ccdc115	-0.25	2.99e-224	6.52e-220	0.277	0.465
Fkbp2	-0.25	1.4e-129	3.07e-125	0.74	0.798
Irs1	-0.25	2.36e-74	5.16e-70	0.517	0.588
Rbms2	-0.25	8.58e-204	1.87e-199	0.409	0.57
Yif1b	-0.25	2.93e-169	6.39e-165	0.893	0.905
Calml4	-0.25	2.01e-243	4.38e-239	0.088	0.265
Bckdk	-0.25	1.67e-182	3.63e-178	0.473	0.613
Tmem60	-0.25	5.84e-201	1.28e-196	0.391	0.551
Rpl18	-0.25	5.06e-282	1.1e-277	0.999	0.999
Rpl9	-0.25	3.45e-264	7.54e-260	0.998	0.996
Sgms2	-0.25	0.0292873	1	0.899	0.866
Gfpt1	-0.25	1.33e-128	2.9e-124	0.522	0.63
Tead1	0.25	8.54e-245	1.86e-240	0.573	0.365
Kif5b	0.25	3.56e-197	7.76e-193	0.838	0.712
Slc8a3	0.25	2.74e-305	5.99e-301	0.563	0.325
Psmc5	0.25	2.14e-199	4.67e-195	0.635	0.472
Srpr	0.25	4.07e-188	8.89e-184	0.893	0.812
Arpc1b	0.25	8.04e-147	1.75e-142	0.868	0.757
Sar1b	0.25	1.33e-220	2.9e-216	0.807	0.666
Adamts4	0.25	2.58e-183	5.63e-179	0.286	0.139
Polr2l	0.25	0	0	0.466	0.231
Ell2	0.25	3.18e-192	6.93e-188	0.806	0.663
Ctps	0.25	0	0	0.443	0.207
Ndufb7	0.25	4.61e-226	1.01e-221	0.934	0.863
Dnajc25	0.25	1.5e-224	3.28e-220	0.75	0.578
Eif3b	0.25	5.47e-210	1.2e-205	0.811	0.668
Jund	0.25	1.55e-150	3.38e-146	0.99	0.975
Bcar3	0.25	0	0	0.497	0.26
Huwe1	0.25	2.09e-226	4.57e-222	0.711	0.529
Mpc1	0.25	2.53e-200	5.53e-196	0.852	0.732
Sumo1	0.25	4.31e-200	9.4e-196	0.879	0.78
Phf20l1	0.25	4.59e-272	1e-267	0.602	0.383
Osbpl9	0.25	1.14e-198	2.49e-194	0.607	0.429
Ubl5	0.26	9.81e-253	2.14e-248	0.962	0.923
Bgn	0.26	4.42e-189	9.64e-185	0.999	0.994
Ube2k	0.26	1.38e-257	3.01e-253	0.775	0.606
Ston2	0.26	1e-213	2.19e-209	0.637	0.439
Nbdy	0.26	3.68e-199	8.03e-195	0.775	0.636
Mdfi	0.26	0	0	0.45	0.203
Atp5e	0.26	6.22e-259	1.36e-254	0.988	0.976
Igsf3	0.26	0	0	0.522	0.27
Tmem176b	0.26	5.45e-136	1.19e-131	0.847	0.77
Ssh2	0.26	0	0	0.519	0.281
Id3	0.26	6.18e-26	1.35e-21	0.984	0.979
Csf1	0.26	7.04e-161	1.54e-156	0.574	0.4
D10Wsu102e	0.26	6.68e-136	1.46e-131	0.433	0.286
Cdh2	0.26	1.13e-134	2.47e-130	0.716	0.586
Ltbp1	0.26	2.84e-147	6.2e-143	0.766	0.638
Tob1	0.26	1.14e-163	2.48e-159	0.892	0.802
2810474O19Rik	0.26	4.74e-80	1.03e-75	0.744	0.652
Aes	0.26	5.37e-195	1.17e-190	0.95	0.901
Psmd6	0.26	1.16e-193	2.52e-189	0.785	0.671
Zfhx3	0.26	7.97e-220	1.74e-215	0.719	0.541
Ugdh	0.26	5.79e-120	1.26e-115	0.899	0.824
Smdt1	0.26	4.53e-203	9.9e-199	0.932	0.864
Nudcd2	0.26	4.03e-202	8.8e-198	0.804	0.676
Pdcd4	0.26	0	0	0.495	0.264
Prnp	0.26	5.66e-145	1.23e-140	0.787	0.664
Ckb	0.26	9.38e-139	2.05e-134	0.926	0.866
Slc35e4	0.26	1.33e-273	2.91e-269	0.503	0.287
Tm9sf3	0.27	2.14e-241	4.66e-237	0.895	0.794
Iscu	0.27	8.98e-229	1.96e-224	0.774	0.605
Trpc6	0.27	0	0	0.285	0.07
Psma3	0.27	3.17e-203	6.91e-199	0.928	0.876
Klhl21	0.27	8.89e-212	1.94e-207	0.626	0.431
Uqcrq	0.27	2.07e-224	4.52e-220	0.984	0.969
Top2b	0.27	2.2e-252	4.8e-248	0.751	0.575
Pomp	0.27	1.56e-228	3.4e-224	0.907	0.811
Ptprs	0.27	9.33e-224	2.04e-219	0.891	0.773
Hnrnpu	0.27	2.62e-188	5.73e-184	0.892	0.791
Ndufb4	0.27	8e-191	1.75e-186	0.883	0.781
Med13l	0.27	2.41e-223	5.26e-219	0.79	0.623
Prpf40a	0.27	3.46e-224	7.55e-220	0.765	0.618
Eif4g3	0.27	2.12e-282	4.63e-278	0.677	0.468
Cd1d1	0.27	1.6e-158	3.49e-154	0.745	0.623
Nme1	0.27	1.44e-220	3.14e-216	0.988	0.97
Arf4	0.27	3.76e-250	8.21e-246	0.991	0.969
Fkbp3	0.27	1.43e-196	3.12e-192	0.785	0.655
Slc5a3	0.27	1.03e-262	2.24e-258	0.411	0.207
Hnrnpm	0.27	1.34e-260	2.94e-256	0.732	0.534
Jag1	0.27	0	0	0.375	0.145
Usmg5	0.27	3.32e-164	7.25e-160	0.951	0.909
Mdm2	0.27	2.31e-83	5.05e-79	0.823	0.755
Tanc1	0.27	1.87e-268	4.09e-264	0.667	0.453
Tspan13	0.27	0	0	0.284	0.093
Dab2ip	0.27	7.37e-291	1.61e-286	0.644	0.412
Oaz1	0.27	0	0	0.998	0.99
Gadd45a	0.27	1.25e-215	2.73e-211	0.42	0.235
Vgll4	0.27	1.56e-269	3.41e-265	0.585	0.364
Stat3	0.27	3.89e-200	8.5e-196	0.841	0.693
Tspan17	0.28	0	0	0.553	0.309
Lipc	0.28	2e-179	4.36e-175	0.724	0.571
S1pr1	0.28	0	0	0.396	0.148
Etf1	0.28	1.07e-260	2.33e-256	0.809	0.633
Etfb	0.28	1.33e-254	2.9e-250	0.787	0.626
Gabarapl2	0.28	4.67e-233	1.02e-228	0.872	0.763
Tma7	0.28	1.61e-261	3.52e-257	0.948	0.89
Myl12b	0.28	2.82e-236	6.15e-232	0.722	0.542
Laptm4a	0.28	0	0	0.988	0.975
Tmem147	0.28	2.79e-251	6.09e-247	0.902	0.798
Atp5h	0.28	0	0	0.986	0.97
Klhl24	0.28	1.39e-197	3.04e-193	0.82	0.681
Tmem126a	0.28	3.48e-253	7.6e-249	0.722	0.547
Metrnl	0.28	7.9e-197	1.72e-192	0.909	0.832
Taldo1	0.28	7.19e-276	1.57e-271	0.68	0.48
Myo10	0.28	2.13e-216	4.66e-212	0.93	0.83
Nedd4	0.28	1.78e-236	3.89e-232	0.976	0.958
Cirbp	0.28	5.12e-256	1.12e-251	0.597	0.394
4833422C13Rik	0.28	0	0	0.329	0.091
Gpr180	0.28	1.57e-276	3.42e-272	0.668	0.465
Atp2b1	0.28	4.47e-190	9.75e-186	0.914	0.84
Mpc2	0.28	2.19e-250	4.78e-246	0.794	0.644
Ndufs5	0.28	8.11e-246	1.77e-241	0.943	0.882
Nupr1	0.28	1.74e-71	3.81e-67	0.998	0.997
Ppp1r15a	0.29	4.01e-159	8.76e-155	0.949	0.859
Srxn1	0.29	4.93e-206	1.08e-201	0.428	0.249
Ptprd	0.29	1.09e-172	2.37e-168	0.759	0.614
Midn	0.29	2.96e-206	6.46e-202	0.749	0.585
Slc25a5	0.29	2.51e-210	5.48e-206	0.976	0.951
Nfia	0.29	0	0	0.406	0.121
Gal	0.29	5.37e-07	0.0117201	0.555	0.549
Eny2	0.29	1e-278	2.19e-274	0.942	0.877
Sqstm1	0.29	1.23e-186	2.68e-182	0.921	0.843
Zmiz1	0.29	1.02e-214	2.22e-210	0.627	0.438
Hpgd	0.29	2.55e-48	5.57e-44	0.806	0.726
Snf8	0.29	0	0	0.724	0.51
Bccip	0.29	2.17e-304	4.74e-300	0.666	0.454
Panx3	0.29	2.84e-217	6.2e-213	0.806	0.655
Nop58	0.29	1.12e-198	2.46e-194	0.692	0.527
Slc38a2	0.29	3.07e-188	6.7e-184	0.986	0.957
Pqlc1	0.29	0	0	0.55	0.305
4931406P16Rik	0.29	0	0	0.575	0.324
Atp5l	0.29	0	0	0.992	0.977
Atox1	0.29	3.22e-227	7.04e-223	0.947	0.883
Ncor2	0.29	0	0	0.552	0.297
Bzw1	0.29	6.81e-242	1.49e-237	0.917	0.834
Elob	0.29	6.82e-276	1.49e-271	0.98	0.962
Chchd2	0.29	0	0	0.995	0.989
Dst	0.29	4.33e-238	9.45e-234	0.722	0.54
Crem	0.29	0	0	0.446	0.202
Mical2	0.3	0	0	0.727	0.485
Tmem160	0.3	3.09e-271	6.74e-267	0.89	0.762
Slc36a2	0.3	1.1e-222	2.41e-218	0.909	0.812
Tmem167	0.3	2.88e-301	6.29e-297	0.958	0.919
Dennd5b	0.3	1.66e-289	3.63e-285	0.652	0.427
Rasgrp2	0.3	2.02e-210	4.4e-206	0.43	0.248
Anapc13	0.3	2.3e-282	5.01e-278	0.812	0.646
1810058I24Rik	0.3	3.24e-156	7.07e-152	0.972	0.942
Srsf6	0.3	3.39e-283	7.4e-279	0.846	0.693
Synm	0.3	0	0	0.551	0.31
Arl6ip5	0.3	5.83e-200	1.27e-195	0.87	0.756
Matn4	0.3	1.91e-239	4.17e-235	0.424	0.229
Rhod	0.3	0	0	0.578	0.348
Vmp1	0.3	1.41e-236	3.08e-232	0.761	0.593
Ppm1d	0.3	0	0	0.532	0.26
Dcun1d5	0.31	1.44e-293	3.15e-289	0.846	0.709
Atp1b3	0.31	1.36e-279	2.96e-275	0.917	0.807
Slc6a6	0.31	7.31e-230	1.6e-225	0.663	0.475
Ccl2	0.31	5.55e-40	1.21e-35	0.158	0.101
Ddx21	0.31	0	0	0.569	0.313
Hk2	0.31	8.72e-178	1.9e-173	0.832	0.697
Mtpn	0.31	1.29e-222	2.81e-218	0.931	0.885
Gem	0.31	7.41e-267	1.62e-262	0.26	0.097
Gsr	0.31	9.65e-270	2.11e-265	0.598	0.391
Zbtb20	0.31	2.12e-214	4.63e-210	0.853	0.72
Efna1	0.31	2.8e-307	6.11e-303	0.582	0.341
Gucy1a1	0.31	1.11e-274	2.42e-270	0.648	0.438
Maged1	0.31	1.84e-267	4.02e-263	0.969	0.93
Rap1b	0.31	1.21e-306	2.64e-302	0.939	0.854
Pmvk	0.31	3.74e-187	8.16e-183	0.556	0.384
Rom1	0.31	2.43e-252	5.3e-248	0.417	0.225
Spag9	0.31	2.11e-263	4.61e-259	0.91	0.779
Ndufb2	0.31	4.54e-261	9.91e-257	0.931	0.847
Foxp1	0.31	1.01e-235	2.19e-231	0.547	0.346
Gtf2h5	0.31	6.74e-297	1.47e-292	0.911	0.805
Ciapin1	0.31	4.38e-298	9.57e-294	0.73	0.519
Cdc42bpa	0.31	1.37e-258	2.99e-254	0.666	0.462
Vps37b	0.31	0	0	0.505	0.267
Cp	0.32	0	0	0.39	0.182
Ogn	0.32	2.98e-282	6.5e-278	0.455	0.244
Psmc4	0.32	0	0	0.726	0.518
Mrfap1	0.32	4e-302	8.74e-298	0.969	0.933
Fyn	0.32	2.75e-184	6e-180	0.907	0.817
Akr1b3	0.32	0	0	0.693	0.486
Klf13	0.32	2.4e-291	5.25e-287	0.862	0.705
Hbegf	0.32	3.9e-244	8.51e-240	0.568	0.354
Psmb5	0.32	2.01e-294	4.39e-290	0.916	0.827
Vcp	0.32	2.19e-298	4.79e-294	0.896	0.786
Foxc1	0.32	9.83e-290	2.15e-285	0.714	0.49
Tiparp	0.32	8.18e-190	1.79e-185	0.82	0.686
Gcnt2	0.32	0	0	0.465	0.202
Nfe2l2	0.32	1.61e-235	3.51e-231	0.771	0.612
Dad1	0.32	0	0	0.991	0.964
Cyp51	0.32	0	0	0.502	0.278
Map7d1	0.32	2.28e-306	4.98e-302	0.824	0.643
Cox5a	0.32	0	0	0.973	0.933
Prex1	0.32	0	0	0.705	0.459
Cd63	0.32	0	0	0.999	0.995
Nav1	0.32	0	0	0.601	0.352
Yod1	0.33	6.04e-255	1.32e-250	0.473	0.269
Efnb1	0.33	0	0	0.614	0.371
Bcor	0.33	0	0	0.624	0.372
Bola3	0.33	0	0	0.757	0.549
Slpi	0.33	1.01e-29	2.2e-25	0.465	0.391
Nr4a3	0.33	1.57e-282	3.43e-278	0.597	0.361
Psmd1	0.33	0	0	0.687	0.454
Gxylt2	0.33	2.6e-288	5.68e-284	0.843	0.668
Hist1h1c	0.33	2.56e-117	5.59e-113	0.865	0.783
Ran	0.33	1.99e-168	4.35e-164	0.917	0.866
Rasa3	0.33	0	0	0.688	0.418
Atp5g1	0.33	2e-232	4.37e-228	0.967	0.94
Lsm6	0.34	0	0	0.738	0.523
Psmb3	0.34	4.75e-287	1.04e-282	0.906	0.815
Thbs2	0.34	4.9e-258	1.07e-253	0.765	0.578
Lmna	0.34	7.63e-279	1.67e-274	0.973	0.903
Jmjd1c	0.34	4.52e-268	9.88e-264	0.882	0.728
Rc3h1	0.34	0	0	0.728	0.501
Arl4d	0.34	2.58e-280	5.63e-276	0.68	0.463
Col1a2	0.34	3.92e-288	8.55e-284	1	1
Serpine2	0.35	8.72e-103	1.9e-98	0.996	0.987
Gspt1	0.35	0	0	0.811	0.639
Rrbp1	0.35	0	0	0.993	0.987
Itpkc	0.35	0	0	0.481	0.209
Ttc39b	0.35	0	0	0.677	0.43
Nfkb1	0.35	0	0	0.533	0.305
Clk1	0.35	6.13e-296	1.34e-291	0.828	0.669
Pfn1	0.35	1.41e-254	3.07e-250	0.981	0.965
Tcf7l2	0.35	0	0	0.722	0.482
Actb	0.35	7.3e-189	1.59e-184	0.999	0.997
Skp1a	0.35	0	0	0.821	0.636
App	0.35	0	0	0.947	0.876
Rps27l	0.35	8.69e-291	1.9e-286	0.986	0.973
Rel	0.35	0	0	0.511	0.219
Pnp	0.35	0	0	0.616	0.361
Srsf2	0.36	0	0	0.779	0.59
Tuba1c	0.36	0	0	0.643	0.375
Fxyd1	0.36	6.08e-266	1.33e-261	0.952	0.89
Lrrc59	0.36	2.86e-301	6.24e-297	0.912	0.818
Pgam2	0.36	7.21e-138	1.57e-133	0.327	0.191
Ankrd11	0.36	2.41e-302	5.27e-298	0.855	0.697
Arid5b	0.36	1.67e-288	3.65e-284	0.82	0.641
Eif4g1	0.36	0	0	0.885	0.74
Sod2	0.36	5.8e-282	1.27e-277	0.807	0.655
Tmem176a	0.36	8.92e-235	1.95e-230	0.887	0.802
Odc1	0.36	9.96e-307	2.17e-302	0.932	0.835
Sec13	0.36	0	0	0.859	0.726
Brd2	0.36	3.22e-273	7.02e-269	0.934	0.845
Mef2a	0.36	3.62e-294	7.9e-290	0.959	0.885
Fos	0.36	2.01e-78	4.4e-74	0.93	0.922
Ndufa12	0.37	0	0	0.896	0.782
Htra3	0.37	3.82e-285	8.33e-281	0.797	0.614
Lhfp	0.37	0	0	0.871	0.711
Zfp469	0.37	0	0	0.587	0.263
Tax1bp1	0.37	0	0	0.869	0.722
Ndufa11	0.37	0	0	0.938	0.838
Akap13	0.37	0	0	0.602	0.328
Smim14	0.37	0	0	0.949	0.876
Rasl11a	0.37	6.46e-227	1.41e-222	0.502	0.311
Robo2	0.37	0	0	0.607	0.35
Dnaja1	0.38	0	0	0.857	0.713
S100a13	0.38	6.55e-200	1.43e-195	0.78	0.644
Ppa1	0.38	0	0	0.727	0.508
Dnajb6	0.38	0	0	0.873	0.704
Uqcr11	0.38	0	0	0.975	0.938
Hnrnpa3	0.38	0	0	0.869	0.712
Ubald2	0.38	0	0	0.742	0.502
Acsl3	0.38	0	0	0.591	0.316
Mlip	0.38	0	0	0.453	0.171
Azin1	0.38	0	0	0.795	0.563
Tmbim1	0.38	0	0	0.846	0.651
Srsf5	0.39	0	0	0.971	0.882
Mafk	0.39	0	0	0.704	0.385
Thbs1	0.39	1.02e-231	2.23e-227	0.982	0.935
Jtb	0.39	0	0	0.854	0.687
Klhl33	0.39	0	0	0.364	0.087
Arhgap23	0.39	0	0	0.699	0.407
Arrdc3	0.39	0	0	0.484	0.261
mt-Nd4	0.39	0	0	0.999	0.996
Fgfr1	0.39	0	0	0.958	0.885
Cox6c	0.39	0	0	0.99	0.975
1110008F13Rik	0.39	0	0	0.916	0.786
Lysmd3	0.39	0	0	0.79	0.555
Snrpb	0.39	0	0	0.888	0.746
2010111I01Rik	0.39	0	0	0.715	0.466
Sox4	0.4	1.52e-195	3.33e-191	0.818	0.686
Crip1	0.4	1.86e-172	4.07e-168	0.744	0.586
Rbbp6	0.4	0	0	0.861	0.685
Smim4	0.4	0	0	0.742	0.507
Psmd8	0.4	0	0	0.917	0.813
Has1	0.4	0	0	0.252	0.059
Ddi2	0.41	0	0	0.745	0.515
Slc20a1	0.41	0	0	0.688	0.455
Hivep2	0.41	0	0	0.557	0.243
Bag3	0.41	0	0	0.808	0.573
Bhlhe40	0.41	0	0	0.932	0.834
Mrpl20	0.41	0	0	0.894	0.777
Glrx5	0.41	0	0	0.844	0.638
Frmd6	0.42	0	0	0.786	0.55
Tmem14c	0.42	0	0	0.838	0.653
Ssh1	0.42	0	0	0.593	0.308
Luzp1	0.42	0	0	0.818	0.611
Hnrnpab	0.42	0	0	0.926	0.81
Fam78b	0.42	0	0	0.518	0.174
Osmr	0.42	0	0	0.598	0.294
Wnt4	0.42	0	0	0.414	0.158
Nedd8	0.42	0	0	0.968	0.926
Smpd3	0.42	7.27e-257	1.59e-252	0.92	0.78
Nfkbiz	0.43	0	0	0.608	0.347
Coq10b	0.43	0	0	0.767	0.48
Sec62	0.43	0	0	0.958	0.875
Zcchc14	0.43	0	0	0.725	0.467
Fosb	0.43	6.13e-225	1.34e-220	0.837	0.655
Tmsb4x	0.43	1.85e-210	4.05e-206	0.983	0.957
Mafb	0.43	0	0	0.376	0.157
Map2k3	0.43	0	0	0.786	0.524
Ebf1	0.43	0	0	0.689	0.411
Fat3	0.43	0	0	0.54	0.269
Dnajc3	0.43	0	0	0.907	0.768
Snai1	0.43	0	0	0.795	0.6
Smim3	0.43	0	0	0.645	0.372
Ift20	0.43	0	0	0.951	0.871
Ece1	0.43	0	0	0.78	0.508
Fas	0.44	0	0	0.526	0.203
Jak1	0.44	0	0	0.88	0.699
Aldh2	0.44	0	0	0.835	0.628
Insig1	0.44	0	0	0.714	0.425
Nop10	0.44	0	0	0.866	0.7
Sem1	0.44	0	0	0.993	0.977
Hmgb1	0.44	0	0	0.944	0.862
Ahcyl1	0.44	6.83e-281	1.49e-276	0.858	0.743
Atp13a3	0.44	0	0	0.683	0.397
Hes1	0.44	2.49e-148	5.45e-144	0.857	0.696
Tcim	0.44	0	0	0.383	0.167
Ddit4	0.44	7.68e-275	1.68e-270	0.692	0.499
Kazald1	0.45	1.56e-218	3.4e-214	0.734	0.584
Ndufa4	0.45	0	0	0.895	0.813
Ibsp	0.45	0	0	1	1
Tgif1	0.45	0	0	0.741	0.429
Irs2	0.45	0	0	0.731	0.408
Nsd3	0.45	0	0	0.82	0.599
Csrnp1	0.45	0	0	0.7	0.382
H2afj	0.45	0	0	0.946	0.855
Fap	0.45	0	0	0.851	0.686
Pim1	0.46	0	0	0.817	0.536
Nudt4	0.46	0	0	0.663	0.381
Txnrd1	0.46	0	0	0.75	0.457
Spata13	0.46	0	0	0.664	0.288
D830025C05Rik	0.46	0	0	0.559	0.232
Ranbp1	0.46	0	0	0.842	0.669
Gpx3	0.46	1.26e-102	2.75e-98	0.946	0.919
Eif5a	0.47	0	0	0.979	0.939
Tubb2a	0.47	0	0	0.646	0.347
Sgk1	0.47	1.83e-266	3.99e-262	0.736	0.529
Igkc	0.47	4.15e-46	9.06e-42	0.275	0.202
Klf9	0.47	0	0	0.954	0.836
Atp5k	0.48	0	0	0.946	0.853
Heg1	0.48	0	0	0.61	0.254
Zfand5	0.49	0	0	0.945	0.835
Ifitm5	0.49	0	0	0.965	0.912
Ccnl1	0.49	0	0	0.896	0.728
Tmem123	0.49	0	0	0.716	0.448
Pkdcc	0.49	0	0	0.685	0.404
Atp5j	0.49	0	0	0.979	0.935
Klf10	0.49	0	0	0.683	0.409
mt-Nd4l	0.49	0	0	0.882	0.688
Sh3pxd2a	0.49	0	0	0.785	0.51
Tuba1a	0.49	3.87e-296	8.44e-292	0.821	0.696
Pxdc1	0.5	0	0	0.859	0.685
H2afz	0.5	0	0	0.985	0.938
Spsb1	0.5	0	0	0.594	0.226
Sfpq	0.5	0	0	0.811	0.548
Stk17b	0.5	0	0	0.87	0.621
Romo1	0.5	0	0	0.932	0.805
mt-Cytb	0.5	0	0	0.999	0.998
Ptp4a1	0.5	0	0	0.939	0.786
Fosl2	0.5	0	0	0.873	0.648
Tnfrsf12a	0.51	0	0	0.692	0.418
Cyp1b1	0.51	0	0	0.389	0.113
Bmp1	0.51	0	0	0.975	0.9
Metap2	0.51	0	0	0.943	0.838
Top1	0.51	0	0	0.875	0.669
Smad7	0.52	0	0	0.903	0.686
Tm4sf1	0.52	0	0	0.587	0.255
Sfrp2	0.52	3.93e-14	8.57e-10	0.322	0.289
Cyfip2	0.52	0	0	0.499	0.094
Rnf122	0.52	0	0	0.631	0.235
Hnrnpa2b1	0.52	0	0	0.949	0.829
Adarb1	0.53	0	0	0.75	0.416
Cycs	0.53	0	0	0.806	0.544
Rnf19b	0.53	0	0	0.787	0.523
Ndufa1	0.53	0	0	0.957	0.843
Itm2b	0.54	0	0	0.999	0.994
Cdh11	0.54	0	0	0.953	0.851
Ctnnb1	0.54	0	0	0.982	0.932
Sphk1	0.54	0	0	0.686	0.296
S100a1	0.54	0	0	0.821	0.606
Srsf3	0.54	0	0	0.89	0.724
Hspa8	0.55	0	0	0.994	0.981
Kcnk1	0.55	0	0	0.839	0.612
Sdc4	0.55	0	0	0.97	0.911
Sbno2	0.55	0	0	0.82	0.535
Pmepa1	0.56	0	0	0.944	0.832
Comp	0.56	4.92e-93	1.07e-88	0.249	0.15
Cd59a	0.57	0	0	0.699	0.409
Dnm3os	0.57	0	0	0.684	0.389
Nr4a2	0.57	0	0	0.874	0.621
Cebpd	0.57	0	0	0.774	0.582
Map1lc3b	0.58	0	0	0.981	0.919
Irf1	0.58	0	0	0.547	0.215
Mcl1	0.58	0	0	0.949	0.801
Nr4a1	0.59	0	0	0.905	0.681
Pard6g	0.59	0	0	0.853	0.544
Skil	0.59	0	0	0.937	0.76
Ubb	0.6	0	0	0.992	0.972
Col22a1	0.6	0	0	0.866	0.621
Nedd9	0.6	0	0	0.862	0.596
H3f3b	0.6	0	0	1	0.997
Uap1	0.61	0	0	0.745	0.462
Klf3	0.61	0	0	0.772	0.453
Col11a1	0.61	0	0	0.985	0.991
Junb	0.62	0	0	0.995	0.966
Gm14005	0.63	0	0	0.684	0.269
Plaur	0.63	0	0	0.807	0.53
Dbi	0.64	0	0	0.946	0.809
Pnrc1	0.64	0	0	0.963	0.87
Prdx1	0.64	0	0	0.989	0.957
Tpm1	0.64	0	0	0.966	0.913
Zfp36l2	0.64	0	0	0.716	0.433
Ifrd1	0.65	0	0	0.918	0.73
Bcl2l11	0.66	0	0	0.847	0.482
Tsc22d1	0.66	0	0	0.932	0.761
Thbs4	0.66	1.51e-213	3.29e-209	0.847	0.717
Atp1a1	0.67	0	0	0.982	0.908
Ier5	0.68	0	0	0.888	0.616
Ddx5	0.68	0	0	0.985	0.923
Fbxo32	0.68	0	0	0.569	0.261
Gpx8	0.68	0	0	0.973	0.89
Irf2bpl	0.7	0	0	0.845	0.465
Socs2	0.7	0	0	0.795	0.399
Atf3	0.7	0	0	0.902	0.708
Ubc	0.72	0	0	0.998	0.977
Adamts5	0.72	0	0	0.632	0.225
Fth1	0.72	0	0	0.999	0.995
H3f3a	0.73	0	0	0.995	0.974
Jun	0.73	0	0	0.903	0.721
Socs3	0.73	0	0	0.842	0.527
Car3	0.74	0	0	0.651	0.385
Ptpn1	0.75	0	0	0.797	0.394
Sost	0.78	0	0	0.531	0.277
Lifr	0.79	0	0	0.991	0.955
Tnc	0.79	4.94e-190	1.08e-185	0.812	0.695
Hmox1	0.8	0	0	0.852	0.761
Cst3	0.8	0	0	1	1
Dstn	0.84	0	0	0.979	0.891
Errfi1	0.85	0	0	0.922	0.679
Gas6	0.86	0	0	0.703	0.453
Zfp36	0.86	0	0	0.898	0.777
Phex	0.89	0	0	0.878	0.549
Cfh	0.89	0	0	0.951	0.74
Tnfaip2	0.9	0	0	0.808	0.61
Ccnd1	0.91	0	0	0.754	0.407
Rcan1	0.92	0	0	0.686	0.283
Btg2	0.92	0	0	0.986	0.907
Gadd45b	0.92	0	0	0.967	0.872
Bach1	0.95	0	0	0.878	0.5
Cadm1	0.95	0	0	0.979	0.863
Bglap3	0.96	0	0	0.889	0.744
Zfp36l1	0.97	0	0	0.968	0.779
Rgs5	0.97	6.03e-192	1.32e-187	0.427	0.268
Nrp2	0.99	0	0	0.994	0.943
Vdr	1.01	0	0	0.815	0.381
Mepe	1.01	3.22e-282	7.03e-278	0.716	0.517
Runx1	1.02	0	0	0.942	0.598
Cebpb	1.03	0	0	0.987	0.949
Nfkbia	1.06	0	0	0.863	0.673
Gadd45g	1.19	0	0	0.987	0.891
Ier3	1.22	0	0	0.99	0.917
Bglap2	1.46	0	0	0.93	0.859
Bglap	1.47	0	0	0.994	0.969
Cxcl1	1.63	0	0	0.536	0.248
Mmp13	1.83	7.82e-50	1.71e-45	0.512	0.444

## Sheet: Supplementary File 1c
	Cell_cluster	12	157	158	159	160	161	163	165	166	167	168	171	172	173	175	177	178	179	180	181	182	183	185	186	187	188	189	190	193	194	195	196	197	198	199	200	201	202	203	204	206	209	215	218	219	220	221	222
Raw proportions	OBP	0.400628	0.228767	0.0986945	0.358379	0.140454	0.125276	0.124576	0.21331	0.00433088	0.411538	0.217595	0.173188	0.0341764	0.0899083	0.0594744	0.186118	0.0286783	0.288985	0.00845922	0.171157	0	0.0708283	0.081741	0.242567	0.117542	0.275565	0.0332779	0.0681293	0.286506	0.400314	0.041041	0.00481348	0.0381194	0.139853	0.187171	0.27044	0	0.0682618	0.0194595	0.0381426	0.112218	0.186158	0.053285	0.0997653	0.0560059	0.0962843	0.214122	0.190983
	Hem	0.0974077	0.210046	0.173368	0.11946	0.0740118	0.198059	0.398449	0.0938704	0.673019	0.261538	0.185841	0.0897583	0.36432	0.216514	0.163209	0.242629	0.429551	0.247525	0.228399	0.111463	0.234163	0.647059	0.299363	0.222222	0.326803	0.216362	0.335275	0.192841	0.189772	0.200942	0.309309	0.501805	0.378653	0.308097	0.280231	0.223825	0.808879	0.356087	0.388649	0.355307	0.156042	0.199284	0.10657	0.256455	0.446573	0.314378	0.283008	0.165936
	OB2	0.117046	0.00273973	0.393211	0.0215281	0.459209	0	0.000969462	0.121191	0.00779558	0	0.074961	0.100115	0.0772386	0.00183486	0	0	0.0829177	0.00742574	0.414502	0.127311	0	0	0.367304	0.0954617	0.000890472	0.160388	0.437604	0.428406	0.00184843	0	0.464464	0	0.148666	0.0599369	0.1551	0.000369959	0	0	0.231351	0.368988	0.480744	0	0.378169	0	0.168755	0.144426	0.0355913	0.0294302
	LMP	0.129615	0.258447	0.206789	0.15745	0.172414	0.442876	0.193408	0.140806	0.257687	0.124359	0.0910984	0.226122	0.356118	0.252294	0.145228	0.159091	0.270574	0.256807	0.198792	0.170629	0.0135747	0.0948379	0.185775	0.205008	0.218166	0.0936491	0.0615641	0.114319	0.155884	0.077708	0.0590591	0.292419	0.277001	0.109359	0.0883281	0.146504	0.174567	0.0513723	0.237297	0.109038	0.163347	0.306683	0.301604	0.0850939	0.223287	0.339257	0.231343	0.170946
	MALP	0.0369207	0.210046	0.0443864	0.102997	0.0559294	0.0776356	0.185167	0.125394	0.0116934	0.05	0.00989068	0.197353	0.0915926	0.384404	0.59751	0.309582	0.135287	0.0779703	0.0797583	0.124142	0.727376	0.0876351	0.00424628	0.0320814	0.264025	0.0387513	0.0282862	0.0508083	0.206408	0.0408163	0.021021	0.0998797	0.0838628	0.0189274	0.0394322	0.203478	0.00902934	0.131597	0.0935135	0.0721393	0.00863214	0.247017	0.115882	0.430164	0.0338983	0.034895	0.10907	0.239198
	OB1	0.084839	0.0187215	0.0078329	0.144365	0.0151388	0.000882223	0.00436258	0.0465849	0	0.0160256	0.286309	0.0684695	0.00136705	0	0	0.0448403	0.00374065	0.00804455	0.00785499	0.0845219	0	0.0384154	0	0.0242567	0.032057	0.0602799	0.00748752	0.00577367	0.0918053	0.179749	0.03003	0	0.00381194	0.256572	0.172976	0.0584536	0.00150489	0.295567	0.00324324	0.00870647	0.00929615	0.00238663	0.0067253	0.0850939	0.00663228	0.00516963	0.0522388	0.0413275
	MPC	0.0487038	0.0342466	0.0245431	0.0295483	0.0277544	0.126599	0.0475036	0.138704	0.0428757	0.075641	0.041645	0.0385501	0.0649351	0.0449541	0.0290456	0.034398	0.0174564	0.0235149	0.0296073	0.0486001	0.0248869	0.0348139	0.0440552	0.0555556	0.0191451	0.0559742	0.0332779	0.0796767	0.0227973	0.0588697	0.017017	0.101083	0.0190597	0.00946372	0.0115668	0.0281169	0.00601956	0.0154821	0.0178378	0.011194	0.0272244	0.0357995	0.0248319	0.0170188	0.0198968	0.0232633	0.0189437	0.0644959
	Ocy	0.084839	0.0369863	0.0511749	0.0662727	0.0550883	0.0286723	0.0455647	0.12014	0.00259853	0.0608974	0.0926601	0.106444	0.0102529	0.0100917	0.0055325	0.0233415	0.0317955	0.0897277	0.0326284	0.162176	0	0.0264106	0.0175159	0.122848	0.0213713	0.0990312	0.063228	0.0600462	0.0449784	0.0416013	0.0580581	0	0.0508259	0.0977918	0.0651945	0.0688124	0	0.0816327	0.00864865	0.0364842	0.0424967	0.022673	0.0129333	0.0264085	0.0449521	0.0423263	0.0556831	0.0976832
	Cell_cluster	12	157	158	159	160	161	163	165	166	167	168	171	172	173	175	177	178	179	180	181	182	183	185	186	187	188	189	190	193	194	195	196	197	198	199	200	201	202	203	204	206	209	215	218	219	220	221	222
Transformed proportions	OBP	0.685361	0.498713	0.319568	0.641812	0.384151	0.361784	0.360725	0.480085	0.065857	0.696469	0.485297	0.429216	0.185938	0.304532	0.246358	0.446059	0.170167	0.567557	0.0921042	0.426527	0	0.269382	0.289949	0.514972	0.349943	0.552648	0.183449	0.264074	0.564819	0.68504	0.203998	0.069435	0.196504	0.383285	0.447411	0.546896	0	0.264337	0.139954	0.196565	0.341594	0.44611	0.232936	0.321359	0.238922	0.315506	0.481075	0.452279
	Hem	0.317405	0.47609	0.429455	0.352909	0.275524	0.461217	0.683136	0.311391	0.96207	0.536823	0.445703	0.30427	0.647995	0.483985	0.415876	0.515045	0.714714	0.520736	0.498275	0.340397	0.50511	0.934664	0.578945	0.490883	0.608536	0.483801	0.617537	0.454637	0.450736	0.464824	0.589753	0.787203	0.662827	0.588441	0.557856	0.492808	1.11834	0.63942	0.673105	0.638605	0.406092	0.462752	0.332546	0.531021	0.731869	0.595224	0.560943	0.419553
	OB2	0.349173	0.0523663	0.677781	0.147256	0.744562	0	0.0311412	0.35557	0.0884077	0	0.277331	0.321942	0.281626	0.0428484	0	0	0.29209	0.0862798	0.699477	0.364848	0	0	0.651093	0.314108	0.0298452	0.412045	0.722839	0.713558	0.0430066	0	0.749833	0	0.395828	0.247334	0.404792	0.0192355	0	0	0.501784	0.652839	0.766137	0	0.662328	0	0.423329	0.389834	0.189794	0.172405
	LMP	0.36829	0.533299	0.47208	0.408028	0.428193	0.728149	0.455355	0.384656	0.532431	0.360397	0.306606	0.495558	0.639452	0.526243	0.390973	0.410276	0.547046	0.531424	0.462135	0.425825	0.116776	0.313046	0.445619	0.469878	0.485988	0.311011	0.25074	0.344908	0.405874	0.282504	0.245479	0.571337	0.554254	0.337039	0.301759	0.39278	0.431036	0.228641	0.508802	0.336525	0.416062	0.586908	0.581388	0.296013	0.492162	0.621749	0.501774	0.426246
	MALP	0.19335	0.47609	0.212271	0.326713	0.238756	0.282369	0.444837	0.361962	0.108348	0.225513	0.0996166	0.460331	0.307464	0.668746	0.883537	0.590048	0.376657	0.282994	0.286311	0.360067	1.02144	0.300536	0.0652097	0.180085	0.539647	0.198148	0.168988	0.227361	0.47161	0.203431	0.145499	0.32155	0.293799	0.138015	0.199904	0.467981	0.0951665	0.371232	0.310778	0.271926	0.0930435	0.520147	0.347358	0.715333	0.185171	0.187906	0.336576	0.511034
	OB1	0.295555	0.137257	0.0886196	0.389746	0.123352	0.0297066	0.0660979	0.217547	0	0.126933	0.564601	0.264749	0.0369821	0	0	0.213371	0.061199	0.0898121	0.0887448	0.294986	0	0.197275	0	0.156382	0.180015	0.248056	0.0866388	0.076058	0.307833	0.437822	0.174171	0	0.0617802	0.531155	0.428936	0.244191	0.0388027	0.574792	0.0569803	0.0934444	0.0965666	0.0488726	0.0821001	0.296013	0.0815291	0.0719622	0.230596	0.204719
	MPC	0.222521	0.186131	0.15731	0.172754	0.167377	0.363778	0.219717	0.381626	0.208573	0.27862	0.205515	0.197626	0.257665	0.213645	0.171264	0.186547	0.13251	0.153953	0.172928	0.22228	0.158418	0.187685	0.211466	0.237941	0.138811	0.238853	0.183449	0.28616	0.151567	0.245077	0.130822	0.323551	0.138499	0.0974358	0.107757	0.168477	0.0776639	0.12475	0.133959	0.106	0.165756	0.190355	0.158241	0.130829	0.141528	0.153121	0.138075	0.256773
	Ocy	0.295555	0.193524	0.228194	0.260367	0.236919	0.170149	0.215114	0.353957	0.0509979	0.24935	0.30931	0.332342	0.10143	0.100627	0.0744496	0.15338	0.179272	0.304217	0.18163	0.414477	0	0.163237	0.132737	0.358102	0.146715	0.320132	0.25418	0.247564	0.213704	0.205405	0.243347	0	0.227401	0.318052	0.258191	0.265427	0	0.289752	0.0931327	0.192189	0.207636	0.151151	0.113971	0.163231	0.213641	0.207213	0.238219	0.317869
[truncated: 32 more columns]

## Sheet: Supplementary File 1d
Raw proportions, (Pearson correlation)	Cell_cluster	body_weight	body_length	FL	ML	AP	bending_yield_stiffness	bending_max_load	bending_yield_load	bending_frax_load	bending_PYD	bending_disp_at_yield	bending_disp_at_frax	bending_disp_at_max_load	bending_total_work	bending_work_to_yield	bending_work_post_yield	histo_BV.TV	histo_OV.TV	histo_OV.BV	histo_BS.BV	histo_OS.BS	histo_ObS.BS	histo_ObS.OS	histo_OcS.BS	histo_TbTh	histo_OTh	histo_NOb.TAR	histo_NOb.BPm	histo_NOb.Opm	histo_Nob.Obpm	histo_NOc.TAR	histo_NOc.BPm	histo_TbSp	histo_TbN	uCT_BMD	uCT_BS.BV	uCT_conn_density	uCT_SMI	uCT_Tb.N	uCT_Tb.Th	uCT_Tb.Sp	uCT_Ct.Ar	uCT_Ma.Ar	uCT_Tt.Ar	uCT_Ct.Ar.Tt.Ar	uCT_Ct.Th	uCT_Ct.TMD	uCT_Ct.porosity
	OBP	0.11	0.03	-0.01	0.02	0.13	0.05	0.1	0.17	0.1	-0.03	0.12	0.02	-0.04	0.08	0.21	0.02	-0.05	-0.01	-0.03	0.2	-0.05	-0.04	0	0.1	-0.19	-0.12	0.06	-0.02	0	-0.04	0.07	0.11	-0.04	0.02	0.08	-0.08	0.17	-0.17	0.07	-0.02	-0.03	0.16	0.04	0.11	0.02	0.15	-0.1	-0.13
	Hem	0.11	0.2	0.13	0.21	0.03	0.14	0.03	-0.13	0.03	0.02	-0.24	-0.08	-0.07	-0.21	-0.3	-0.14	0.07	-0.06	-0.03	-0.21	0.04	-0.08	-0.2	-0.11	0.22	0.06	-0.14	-0.09	-0.2	-0.04	-0.05	-0.12	0.07	-0.02	0.09	0.06	0.07	-0.03	0.12	-0.02	-0.15	0.04	0.16	0.13	-0.1	-0.06	-0.09	0.12
	OB2	-0.18	-0.22	-0.08	-0.32	-0.27	-0.04	0.05	0.11	0	-0.08	0.17	-0.01	-0.07	0.11	0.07	0.11	-0.09	0.09	0.15	-0.04	0.14	0.18	0.17	0.09	0.06	0.16	0.09	0.16	0.16	-0.01	-0.01	0.1	0.05	-0.13	-0.24	0.17	-0.29	0.38	-0.2	-0.07	0.12	-0.23	-0.27	-0.3	0.12	-0.08	0.22	-0.02
	LMP	-0.2	-0.14	-0.24	0.08	-0.02	-0.27	-0.26	-0.36	-0.29	0.14	-0.26	0.02	-0.07	-0.09	-0.21	-0.03	-0.12	-0.07	-0.02	0.08	-0.04	-0.03	-0.05	-0.07	-0.13	-0.02	-0.05	-0.01	-0.01	0.16	-0.07	-0.07	0.03	-0.08	0.01	0.03	0.01	-0.04	0.04	-0.08	-0.07	-0.15	0.13	0.01	-0.22	-0.26	-0.17	0.15
	MALP	0	0.02	0.16	-0.05	0.12	0.11	-0.04	-0.01	-0.01	0.03	-0.04	0.01	0.02	-0.03	-0.01	-0.03	0.2	-0.01	-0.09	-0.06	-0.09	-0.06	-0.02	0.11	0.06	-0.07	-0.01	-0.06	0	0.05	0.16	0.07	-0.11	0.18	0.15	-0.08	0.12	-0.11	0.17	0.08	-0.13	0.07	0.03	0.06	0.03	0.08	0.03	-0.05
	OB1	0.19	0.07	0.03	0.05	0.06	-0.07	0.03	0.09	0.07	-0.06	0.16	0.01	0.13	0.1	0.23	0.03	0.05	0.04	-0.03	0.01	-0.04	-0.02	0.02	-0.02	0	0	0.04	-0.02	0.01	-0.09	0	-0.03	-0.07	0.08	0	-0.16	0.03	-0.1	-0.08	0.12	0.07	0.01	-0.01	0	0.02	0.03	-0.02	0
	MPC	0.05	0.12	-0.04	0.2	0.02	-0.02	-0.08	-0.06	-0.04	0.05	-0.05	0.02	0.15	-0.01	0	-0.01	-0.12	-0.03	-0.01	0.14	-0.01	0.01	0.03	-0.22	-0.16	-0.12	0	0.01	0.06	0.09	-0.16	-0.17	0.07	-0.06	-0.08	-0.01	-0.04	-0.07	-0.1	-0.04	0.26	0.18	0.08	0.15	0.02	0.12	-0.02	-0.01
	Ocy	-0.05	-0.1	-0.13	-0.11	0.03	-0.04	0.19	0.34	0.22	-0.03	0.36	0.13	0.21	0.25	0.33	0.18	-0.04	0.06	0.01	0.13	-0.01	0.04	0.15	0.01	-0.11	0	0.07	0.01	0.08	-0.19	-0.03	0.02	-0.04	0.03	-0.06	-0.12	-0.04	0.01	-0.17	0.13	0.21	0.04	-0.2	-0.11	0.21	0.17	0.17	-0.17
Raw proportions, (Spearman correlation)	Cell_cluster	body_weight	body_length	FL	ML	AP	bending_yield_stiffness	bending_max_load	bending_yield_load	bending_frax_load	bending_PYD	bending_disp_at_yield	bending_disp_at_frax	bending_disp_at_max_load	bending_total_work	bending_work_to_yield	bending_work_post_yield	histo_BV.TV	histo_OV.TV	histo_OV.BV	histo_BS.BV	histo_OS.BS	histo_ObS.BS	histo_ObS.OS	histo_OcS.BS	histo_TbTh	histo_OTh	histo_NOb.TAR	histo_NOb.BPm	histo_NOb.Opm	histo_Nob.Obpm	histo_NOc.TAR	histo_NOc.BPm	histo_TbSp	histo_TbN	uCT_BMD	uCT_BS.BV	uCT_conn_density	uCT_SMI	uCT_Tb.N	uCT_Tb.Th	uCT_Tb.Sp	uCT_Ct.Ar	uCT_Ma.Ar	uCT_Tt.Ar	uCT_Ct.Ar.Tt.Ar	uCT_Ct.Th	uCT_Ct.TMD	uCT_Ct.porosity
	OBP	0.14	0.11	0.08	0.06	0.21	0.03	0.09	0.19	0.06	0.03	0.16	0.11	0.01	0.12	0.16	0.11	-0.01	-0.01	-0.02	0.19	0	-0.02	0.05	0.21	-0.19	-0.11	0.02	-0.03	0.02	0.02	0.19	0.24	-0.05	0.07	0.09	-0.18	0.12	-0.22	0.03	0.1	-0.03	0.2	0.08	0.15	0.05	0.16	-0.04	-0.15
	Hem	0.09	0.15	0.12	0.14	0.06	0.1	-0.03	-0.13	-0.03	-0.04	-0.24	-0.13	-0.08	-0.19	-0.32	-0.15	0.15	0.05	-0.07	-0.26	-0.04	-0.07	-0.19	-0.01	0.26	0.12	-0.04	-0.08	-0.19	-0.05	0.01	-0.03	-0.09	0.08	0.1	0.03	0.12	-0.04	0.18	-0.03	-0.18	-0.04	0.13	0.06	-0.14	-0.09	-0.08	0.04
	OB2	-0.18	-0.22	-0.08	-0.29	-0.26	-0.02	0.08	0.16	0.04	-0.05	0.29	0.04	0	0.16	0.3	0.11	-0.08	0.07	0.14	0.03	0.12	0.14	0.13	0.03	-0.03	0.15	0.08	0.15	0.13	0.06	-0.03	0.02	0.11	-0.13	-0.25	0.13	-0.31	0.36	-0.25	-0.05	0.24	-0.24	-0.29	-0.31	0.14	-0.07	0.27	-0.03
	LMP	-0.22	-0.21	-0.15	0.02	-0.06	-0.21	-0.14	-0.3	-0.22	0.21	-0.27	0.07	-0.02	-0.07	-0.26	-0.01	-0.05	-0.06	-0.04	0.04	-0.05	-0.04	0	-0.02	-0.04	-0.03	-0.02	-0.01	0.04	0.18	-0.01	0.01	0.02	-0.02	0.01	0.03	-0.02	0.02	0.02	-0.05	-0.01	-0.2	0.07	-0.07	-0.21	-0.24	-0.11	0.13
	MALP	0.03	0.06	0.13	0.05	0.21	0.06	0.02	-0.02	0.01	0.07	-0.05	0.09	0.14	0.1	0	0.07	0.12	0.04	-0.07	-0.11	-0.03	-0.03	0.06	0.06	0.11	-0.02	0.04	-0.03	0.06	-0.01	0.09	0.08	-0.11	0.11	0.2	-0.16	0.14	-0.19	0.17	0.15	-0.16	0.19	0.06	0.14	0.03	0.17	0.02	0.08
	OB1	0.23	0.14	0.22	0.13	0.24	0.07	0.15	0.21	0.19	-0.06	0.18	0.05	0.08	0.16	0.21	0.13	0.08	0.04	-0.04	0	0	0.03	0.1	0.06	0	-0.05	0.06	0.01	0.05	-0.09	0.09	0.09	-0.09	0.09	0.04	-0.23	0.02	-0.19	-0.09	0.2	0.09	0.17	0.12	0.18	0.01	0.12	-0.05	0.05
	MPC	0	0.07	-0.04	0.11	0.08	0.04	-0.1	-0.02	-0.04	0	-0.09	-0.03	-0.05	-0.02	0.01	-0.03	-0.08	-0.03	0	0.19	-0.04	0.01	0.09	-0.15	-0.19	-0.14	0.03	0.03	0.13	0.02	-0.12	-0.11	0.03	-0.02	0.04	0.05	0.08	-0.13	0.09	-0.09	-0.08	0.18	0.03	0.13	0.09	0.15	-0.12	-0.02
	Ocy	-0.01	-0.07	-0.09	-0.1	0.01	-0.01	0.08	0.29	0.1	-0.01	0.31	0.15	0.12	0.25	0.34	0.2	-0.01	0.07	0.07	0.12	0.06	0.12	0.16	0.03	-0.12	-0.03	0.11	0.09	0.1	-0.12	0.04	0.06	-0.01	0.01	-0.12	-0.12	-0.12	0.02	-0.2	0.13	0.19	-0.02	-0.17	-0.1	0.2	0.12	0.17	-0.14
Transformed proportions, (Pearson correlation)	Cell_cluster	body_weight	body_length	FL	ML	AP	bending_yield_stiffness	bending_max_load	bending_yield_load	bending_frax_load	bending_PYD	bending_disp_at_yield	bending_disp_at_frax	bending_disp_at_max_load	bending_total_work	bending_work_to_yield	bending_work_post_yield	histo_BV.TV	histo_OV.TV	histo_OV.BV	histo_BS.BV	histo_OS.BS	histo_ObS.BS	histo_ObS.OS	histo_OcS.BS	histo_TbTh	histo_OTh	histo_NOb.TAR	histo_NOb.BPm	histo_NOb.Opm	histo_Nob.Obpm	histo_NOc.TAR	histo_NOc.BPm	histo_TbSp	histo_TbN	uCT_BMD	uCT_BS.BV	uCT_conn_density	uCT_SMI	uCT_Tb.N	uCT_Tb.Th	uCT_Tb.Sp	uCT_Ct.Ar	uCT_Ma.Ar	uCT_Tt.Ar	uCT_Ct.Ar.Tt.Ar	uCT_Ct.Th	uCT_Ct.TMD	uCT_Ct.porosity
	OBP	0.12	0.05	0.03	0.02	0.14	0.04	0.09	0.18	0.08	0.01	0.13	0.06	-0.02	0.12	0.22	0.06	-0.04	0.03	-0.02	0.2	-0.04	-0.01	0.04	0.14	-0.19	-0.1	0.09	0.01	0.03	-0.02	0.1	0.15	-0.07	0.02	0.08	-0.11	0.14	-0.18	0.05	0.02	-0.01	0.18	0.05	0.13	0.01	0.16	-0.1	-0.1
	Hem	0.11	0.2	0.14	0.2	0.04	0.14	0.02	-0.12	0.03	0.01	-0.23	-0.09	-0.08	-0.21	-0.3	-0.15	0.09	-0.05	-0.03	-0.22	0.03	-0.08	-0.2	-0.08	0.23	0.06	-0.14	-0.09	-0.2	-0.02	-0.02	-0.09	0.05	0	0.1	0.05	0.07	-0.04	0.13	-0.01	-0.16	0.05	0.15	0.13	-0.09	-0.05	-0.08	0.12
	OB2	-0.19	-0.25	-0.1	-0.3	-0.26	-0.05	0.12	0.19	0.07	-0.08	0.25	0.02	-0.01	0.17	0.14	0.15	-0.11	0.1	0.16	0	0.14	0.17	0.17	0.06	0.03	0.17	0.1	0.16	0.15	-0.01	-0.04	0.08	0.08	-0.14	-0.25	0.16	-0.3	0.38	-0.23	-0.05	0.16	-0.23	-0.3	-0.32	0.15	-0.06	0.27	-0.06
	LMP	-0.19	-0.13	-0.2	0.09	0	-0.25	-0.23	-0.33	-0.27	0.14	-0.25	0.03	-0.07	-0.07	-0.19	-0.02	-0.13	-0.05	-0.01	0.08	-0.02	0	-0.03	-0.06	-0.14	-0.01	-0.02	0.02	0.02	0.18	-0.07	-0.04	0.04	-0.09	0.01	0.03	0	-0.04	0.04	-0.07	-0.06	-0.14	0.14	0.02	-0.21	-0.24	-0.16	0.15
	MALP	0.01	0.04	0.16	-0.02	0.15	0.09	-0.03	-0.02	-0.02	0.08	-0.04	0.06	0.07	0.01	0.01	0.01	0.2	0.02	-0.08	-0.06	-0.09	-0.05	0.01	0.12	0.06	-0.05	0.01	-0.04	0.02	0.04	0.16	0.08	-0.13	0.18	0.17	-0.11	0.14	-0.14	0.17	0.11	-0.13	0.1	0.05	0.09	0.03	0.11	0.01	-0.01
	OB1	0.23	0.11	0.12	0.09	0.15	-0.01	0.1	0.16	0.13	-0.05	0.19	0.03	0.12	0.13	0.26	0.06	0.07	0.06	-0.03	0	-0.03	-0.01	0.03	0.01	0.02	0	0.06	-0.01	0.01	-0.12	0.03	0.01	-0.08	0.09	0.03	-0.2	0.03	-0.15	-0.09	0.16	0.1	0.08	0.05	0.08	0	0.07	-0.03	0.04
	MPC	0.03	0.11	-0.05	0.17	0.03	0	-0.08	-0.06	-0.04	0.06	-0.08	0.03	0.14	0	0	-0.01	-0.11	-0.02	-0.01	0.14	-0.01	0.02	0.06	-0.21	-0.16	-0.12	0.02	0.02	0.07	0.07	-0.16	-0.16	0.03	-0.05	-0.04	0	0.01	-0.09	-0.04	-0.05	0.19	0.19	0.07	0.15	0.03	0.14	-0.06	-0.05
	Ocy	-0.04	-0.1	-0.12	-0.14	0.02	-0.03	0.15	0.32	0.16	-0.01	0.33	0.13	0.17	0.25	0.32	0.19	-0.04	0.09	0.02	0.11	0.01	0.06	0.15	0.06	-0.09	0.01	0.1	0.03	0.09	-0.17	0	0.08	-0.05	0.01	-0.07	-0.12	-0.07	0.01	-0.19	0.13	0.23	0.02	-0.21	-0.13	0.19	0.15	0.17	-0.15
Transformed proportions, (Spearman correlation)	Cell_cluster	body_weight	body_length	FL	ML	AP	bending_yield_stiffness	bending_max_load	bending_yield_load	bending_frax_load	bending_PYD	bending_disp_at_yield	bending_disp_at_frax	bending_disp_at_max_load	bending_total_work	bending_work_to_yield	bending_work_post_yield	histo_BV.TV	histo_OV.TV	histo_OV.BV	histo_BS.BV	histo_OS.BS	histo_ObS.BS	histo_ObS.OS	histo_OcS.BS	histo_TbTh	histo_OTh	histo_NOb.TAR	histo_NOb.BPm	histo_NOb.Opm	histo_Nob.Obpm	histo_NOc.TAR	histo_NOc.BPm	histo_TbSp	histo_TbN	uCT_BMD	uCT_BS.BV	uCT_conn_density	uCT_SMI	uCT_Tb.N	uCT_Tb.Th	uCT_Tb.Sp	uCT_Ct.Ar	uCT_Ma.Ar	uCT_Tt.Ar	uCT_Ct.Ar.Tt.Ar	uCT_Ct.Th	uCT_Ct.TMD	uCT_Ct.porosity
	OBP	0.14	0.11	0.08	0.06	0.21	0.03	0.09	0.19	0.06	0.03	0.16	0.11	0.01	0.12	0.16	0.11	-0.01	-0.01	-0.02	0.19	0	-0.02	0.05	0.21	-0.19	-0.11	0.02	-0.03	0.02	0.02	0.19	0.24	-0.05	0.07	0.09	-0.18	0.12	-0.22	0.03	0.1	-0.03	0.2	0.08	0.15	0.05	0.16	-0.04	-0.15
	Hem	0.09	0.15	0.12	0.14	0.06	0.1	-0.03	-0.13	-0.03	-0.04	-0.24	-0.13	-0.08	-0.19	-0.32	-0.15	0.15	0.05	-0.07	-0.26	-0.04	-0.07	-0.19	-0.01	0.26	0.12	-0.04	-0.08	-0.19	-0.05	0.01	-0.03	-0.09	0.08	0.1	0.03	0.12	-0.04	0.18	-0.03	-0.18	-0.04	0.13	0.06	-0.14	-0.09	-0.08	0.04
	OB2	-0.18	-0.22	-0.08	-0.29	-0.26	-0.02	0.08	0.16	0.04	-0.05	0.29	0.04	0	0.16	0.3	0.11	-0.08	0.07	0.14	0.03	0.12	0.14	0.13	0.03	-0.03	0.15	0.08	0.15	0.13	0.06	-0.03	0.02	0.11	-0.13	-0.25	0.13	-0.31	0.36	-0.25	-0.05	0.24	-0.24	-0.29	-0.31	0.14	-0.07	0.27	-0.03
	LMP	-0.22	-0.21	-0.15	0.02	-0.06	-0.21	-0.14	-0.3	-0.22	0.21	-0.27	0.07	-0.02	-0.07	-0.26	-0.01	-0.05	-0.06	-0.04	0.04	-0.05	-0.04	0	-0.02	-0.04	-0.03	-0.02	-0.01	0.04	0.18	-0.01	0.01	0.02	-0.02	0.01	0.03	-0.02	0.02	0.02	-0.05	-0.01	-0.2	0.07	-0.07	-0.21	-0.24	-0.11	0.13
	MALP	0.03	0.06	0.13	0.05	0.21	0.06	0.02	-0.02	0.01	0.07	-0.05	0.09	0.14	0.1	0	0.07	0.12	0.04	-0.07	-0.11	-0.03	-0.03	0.06	0.06	0.11	-0.02	0.04	-0.03	0.06	-0.01	0.09	0.08	-0.11	0.11	0.2	-0.16	0.14	-0.19	0.17	0.15	-0.16	0.19	0.06	0.14	0.03	0.17	0.02	0.08
	OB1	0.23	0.14	0.22	0.13	0.24	0.07	0.15	0.21	0.19	-0.06	0.18	0.05	0.08	0.16	0.21	0.13	0.08	0.04	-0.04	0	0	0.03	0.1	0.06	0	-0.05	0.06	0.01	0.05	-0.09	0.09	0.09	-0.09	0.09	0.04	-0.23	0.02	-0.19	-0.09	0.2	0.09	0.17	0.12	0.18	0.01	0.12	-0.05	0.05
	MPC	0	0.07	-0.04	0.11	0.08	0.04	-0.1	-0.02	-0.04	0	-0.09	-0.03	-0.05	-0.02	0.01	-0.03	-0.08	-0.03	0	0.19	-0.04	0.01	0.09	-0.15	-0.19	-0.14	0.03	0.03	0.13	0.02	-0.12	-0.11	0.03	-0.02	0.04	0.05	0.08	-0.13	0.09	-0.09	-0.08	0.18	0.03	0.13	0.09	0.15	-0.12	-0.02
	Ocy	-0.01	-0.07	-0.09	-0.1	0.01	-0.01	0.08	0.29	0.1	-0.01	0.31	0.15	0.12	0.25	0.34	0.2	-0.01	0.07	0.07	0.12	0.06	0.12	0.16	0.03	-0.12	-0.03	0.11	0.09	0.1	-0.12	0.04	0.06	-0.01	0.01	-0.12	-0.12	-0.12	0.02	-0.2	0.13	0.19	-0.02	-0.17	-0.1	0.2	0.12	0.17	-0.14
[truncated: 7 more columns]

## Sheet: Supplementary File 1e
Trait (abbreviation)	Trait	Unit
body_weight	Body Weight	g
body_length	Body Length	mm
FL	Full femoral length (4-point bending)	mm
ML	Medial-lateral femoral width	mm
AP	Anterior-posterior femoral width	mm
bending_yield_stiffness	Yield stiffness (4-point bending)	N/mm
bending_max_load	Max load (4-point bending)	N
bending_yield_load	Yield Load (4-point bending)	N
bending_frax_load	Fracture load (4-point bending)	N
bending_PYD	Post-yield deflection (4-point bending)	mm
bending_disp_at_yield	Displacement at yield (4-point bending)	mm
bending_disp_at_frax	Displacement at fracture (4-point bending)	mm
bending_disp_at_max_load	Displacement at max load (4-point bending)	mm
bending_total_work	Total work (4-point bending)	N*mm
bending_work_to_yield	Work-to-yield (4-point bending)	N*mm
bending_work_post_yield	Work post-yield (4-point bending)	N*mm
histo_BV.TV	Bone volume fraction (bone volume/total volume) (histomorphometry)	%
histo_OV.TV	Osteoid volume/total volume (histomorphometry)	%
histo_OV.BV	Osteoid volume/bone volume (histomorphometry)	%
histo_BS.BV	bone surface / bone volume (histomorphometry)	mm-1
histo_OS.BS	osteoid surface/bone surface (histomorphometry)	%
histo_ObS.BS	osteoblast surface/bone surface (histomorphometry)	%
histo_ObS.OS	Osteoblast surface / osteoid surface (histomorphometry)	%
histo_OcS.BS	osteoclast surface/bone surface (histomorphometry)	%
histo_TbTh	Trabecular thickness (histomorphometry)	mm
histo_OTh	Osteoid thickness (histomorphometry)	mcm
histo_NOb.TAR	Number of osteoblasts/tissue area (histomorphometry)	mm-1
histo_NOb.BPm	Number of osteoblasts/bone perimeter (histomorphometry)	mm-1
histo_NOb.Opm	Number of osteoblasts/osteoid perimeter (histomorphometry)	mm-1
histo_Nob.Obpm	Number of osteblasts/osteoblast perimeter (histomorphometry)	mm-1
histo_NOc.TAR	Number of osteoclasts/tissue area (histomorphometry)	mm-1
histo_NOc.BPm	Number of osteoclasts/bone perimeter (histomorphometry)	mm-1
histo_TbSp	Trabecular separation (histomorphometry)	mm
histo_TbN	Trabecular number (histomorphometry)	mm-1
uCT_BMD	Volumetric bone mineral density (micro-CT)	mgHA/cm3
uCT_BS.BV	Bone volume fraction (bone volume/total volume) (micro-CT)	%
uCT_conn_density	Connectivity Density (micro-CT)	mm-3
uCT_SMI	Structural model index (micro-CT)	-
uCT_Tb.N	Trabecular number (micro-CT)	mm-1
uCT_Tb.Th	Trabecular thickness (micro-CT)	mm
uCT_Tb.Sp	Trabecular separation (micro-CT)	mm
uCT_Ct.Ar	Bone area (micro-CT)	mm2
uCT_Ma.Ar	Medullary area (micro-CT)	mm2
uCT_Tt.Ar	Total area (micro-CT)	mm2
uCT_Ct.Ar.Tt.Ar	Bone area fraction (micro-CT)	%
uCT_Ct.Th	Cortical thickness (micro-CT)	mm
uCT_Ct.TMD	Cortical tissue mineral density (micro-CT)	mgHA/cm3
uCT_Ct.porosity	Cortical porosity (micro-CT)	%
uCT_pMOI	Polar moment of inertia (micro-CT)	mm4
uCT_Imax	Maximum moment of inertia (micro-CT)	mm4
uCT_Imin	Minimum moment of inertia (micro-CT)	mm4
MAT_VOL1	Marrow adipose tissue - volume 1	%
MAT_VOL2	Marrow adipose tissue - volume 2	%
MAT_VOL3	Marrow adipose tissue - volume 3	%
MAT_VOL4	Marrow adipose tissue - volume 4	%

## Sheet: Supplementary File 1f
Cell cluster	Beta	Beta SE	P-value	Adjusted P-value
MALP	4.84e-08	1.45e-08	0.000417	0.006255
Ocy	5.62e-08	1.76e-08	0.000692	0.01038
OB1	5.56e-08	1.83e-08	0.00118	0.0177
MPC	9.59e-08	4.25e-08	0.012	0.18
LMP	3.27e-08	1.48e-08	0.0136	0.204
OBP	2.94e-08	1.36e-08	0.0153	0.2295
OB2	2.76e-08	1.38e-08	0.0222	0.333
EC	-1.67e-08	1.18e-08	0.921	1
MF1	-3.24e-08	1.31e-08	0.993	1
MO	-3.73e-08	1.41e-08	0.996	1
BC	-3.94e-08	1.33e-08	1	1
GC	-3.11e-08	1.04e-08	1	1
OC	-5.29e-08	1.33e-08	1	1
TC	-4.68e-08	1.05e-08	1	1
MF2	-6.09e-08	1.12e-08	1	1

## Sheet: Supplementary File 1g
Cell Cluster	Total number of modules	Total genes fit (into modules)	Module size (number of genes a module) (min, median, max)	Total number of Bayesian Networks (generated from modules)
MPC	26	2828	(25, 101, 298)	482
LMP	90	9784	(25, 94, 768)	1731
OBP	70	7514	(34, 101, 270)	1256
OB1	64	5792	(31, 81, 193)	976
OB2	153	11740	(28, 75, 538)	2032
Ocy	60	6589	(34, 100, 250)	1135
MALP	72	6886	(32, 87, 373)	1198
Total	535	-	-	8810

## Sheet: Supplementary File 1h
Cell Cluster	Gene	Module
MPC	Rb1cc1	P1_I6_M10
MPC	4732440D04Rik	P2_I3_M3
MPC	Pcmtd1	P1_I6_M10
MPC	Rrs1	P1_I6_M8
MPC	Cpa6	P1_I6_M13
MPC	Tram1	P1_I6_M4
MPC	Rpl7	P2_I3_M2
MPC	Tmem70	P1_I6_M16
MPC	Mcm3	P1_I6_M5
MPC	Paqr8	P2_I3_M3
MPC	B3gat2	P2_I3_M1
MPC	Smap1	P1_I6_M17
MPC	Phf3	P1_I6_M15
MPC	Uggt1	P1_I6_M2
MPC	Neurl3	P1_I6_M11
MPC	4930403P22Rik	P1_I6_M18
MPC	Cnnm3	P1_I6_M13
MPC	Cox5b	P1_I6_M1
MPC	Mrpl30	P1_I6_M1
MPC	Txndc9	P5_I3_M1
MPC	Eif5b	P2_I3_M4
MPC	Pdcl3	P1_I6_M16
MPC	Rpl31	P1_I6_M16
MPC	Map4k4	P2_I3_M2
MPC	Il18rap	P1_I6_M11
MPC	Fhl2	P5_I3_M1
MPC	Col5a2	P1_I6_M2
MPC	Myo1b	P1_I6_M2
MPC	Stat1	P1_I6_M7
MPC	Nemp2	P1_I6_M14
MPC	Stk17b	P2_I3_M2
MPC	Sf3b1	P1_I6_M10
MPC	Hspd1	P1_I6_M8
MPC	Hspe1	P1_I6_M8
MPC	Satb2	P1_I6_M2
MPC	Sgo2a	P1_I6_M5
MPC	Aox1	P1_I6_M14
MPC	Clk1	P1_I6_M10
MPC	Als2	P1_I6_M14
MPC	Nop58	P1_I6_M8
MPC	Bmpr2	P2_I3_M2
MPC	Fam117b	P6_I1_M1
MPC	Wdr12	P1_I6_M16
MPC	Raph1	P1_I6_M2
MPC	Nrp2	P1_I6_M2
MPC	Ikzf2	P1_I6_M14
MPC	Bard1	P1_I6_M7
MPC	Atic	P1_I6_M8
MPC	Rpl37a	P3_I2_M1
MPC	Igfbp5	P1_I6_M12
MPC	Slc11a1	P1_I6_M7
MPC	Cyp27a1	P1_I6_M7
MPC	Slc23a3	P1_I6_M6
MPC	Cnppd1	P1_I6_M2
MPC	Glb1l	P1_I6_M7
MPC	Gmppa	P1_I6_M4
MPC	Inha	P1_I6_M14
MPC	Stk11ip	P1_I6_M7
MPC	Farsb	P1_I6_M1
MPC	Wdfy1	P5_I3_M1
MPC	Serpine2	P1_I6_M2
MPC	Cul3	P2_I3_M4
MPC	Dock10	P1_I6_M3
MPC	Trip12	P2_I3_M2
MPC	Sp140	P1_I6_M11
MPC	Sp100	P1_I6_M7
MPC	Ptma	P1_I6_M8
MPC	Ackr3	P1_I6_M2
MPC	Ramp1	P1_I6_M2
MPC	Per2	P1_I6_M6
MPC	Gpc1	P1_I6_M4
MPC	Pask	P2_I3_M1
MPC	Hdlbp	P1_I6_M2
MPC	Bok	P5_I3_M1
MPC	Dtymk	P1_I6_M8
MPC	2310035C23Rik	P1_I6_M7
MPC	Phlpp1	P1_I6_M7
MPC	Bcl2	P1_I6_M7
MPC	Tsn	P2_I3_M4
MPC	Ptpn4	P1_I6_M2
MPC	Marco	P1_I6_M7
MPC	Insig2	P1_I6_M9
MPC	Actr3	P1_I6_M8
MPC	2900009J06Rik	P1_I6_M6
MPC	Rab3gap1	P2_I3_M2
MPC	Zranb3	P1_I6_M3
MPC	R3hdm1	P2_I3_M2
MPC	Mcm6	P1_I6_M5
MPC	Dars	P1_I6_M8
MPC	Cxcr4	P4_I1_M1
MPC	Pfkfb2	P1_I6_M6
MPC	Dyrk3	P2_I3_M1
MPC	Ikbke	P1_I6_M3
MPC	Nucks1	P1_I6_M8
MPC	Tmcc2	P1_I6_M7
MPC	Snrpe	P1_I6_M8
MPC	Zc3h11a	P1_I6_M13
MPC	Gm38394	P2_I3_M1
MPC	Lax1	P1_I6_M6
MPC	Atp2b4	P2_I3_M1
MPC	Fmod	P1_I6_M9
MPC	Btg2	P1_I6_M10
MPC	Chil1	P1_I6_M11
MPC	Adipor1	P1_I6_M4
MPC	Ptpn7	P1_I6_M11
MPC	Timm17a	P1_I6_M1
MPC	Csrp1	P5_I3_M1
MPC	Phlda3	P1_I6_M1
MPC	Tnni1	P2_I3_M1
MPC	Kif14	P2_I3_M3
MPC	Gm19705	P6_I1_M1
MPC	Ptprc	P1_I6_M11
MPC	Cfh	P1_I6_M2
MPC	Kcnt2	P2_I3_M3
MPC	Cdc73	P2_I3_M2
MPC	Glrx2	P1_I6_M1
MPC	Trove2	P2_I3_M2
MPC	Rgs18	P1_I6_M3
MPC	Rgs8	P1_I6_M13
MPC	Glul	P1_I6_M12
MPC	Gm2000	P3_I2_M1
MPC	Cop1	P2_I3_M2
MPC	Mrps14	P1_I6_M1
MPC	Cacybp	P1_I6_M8
MPC	Rc3h1	P1_I6_M10
MPC	Prdx6	P1_I6_M1
MPC	Prrc2c	P2_I3_M4
MPC	Fmo1	P1_I6_M12
MPC	Fmo2	P1_I6_M12
MPC	Atp1b1	P1_I6_M6
MPC	Rcsd1	P1_I6_M11
MPC	Mgst3	P1_I6_M4
MPC	Nuf2	P1_I6_M5
MPC	Nos1ap	P1_I6_M3
MPC	Dusp12	P1_I6_M16
MPC	Fcgr3	P4_I1_M1
MPC	Fcer1g	P4_I1_M1
MPC	Ndufs2	P1_I6_M1
MPC	Ufc1	P1_I6_M17
MPC	Gm20045	P1_I6_M7
MPC	Cd244	P1_I6_M13
MPC	Ly9	P1_I6_M7
MPC	Cd48	P1_I6_M7
MPC	Copa	P1_I6_M2
MPC	Tagln2	P1_I6_M8
MPC	Aim2	P1_I6_M3
MPC	Catspere2	P1_I6_M13
MPC	B230369F24Rik	P1_I6_M3
MPC	Hnrnpu	P1_I6_M15
MPC	Cdc42bpa	P2_I3_M2
MPC	Coq8a	P2_I3_M1
MPC	Gm17275	P1_I6_M14
MPC	Cnih4	P1_I6_M8
MPC	Wdr26	P1_I6_M10
MPC	Enah	P1_I6_M9
MPC	Srp9	P1_I6_M4
MPC	Mia3	P1_I6_M2
MPC	C130074G19Rik	P2_I3_M3
MPC	Mark1	P1_I6_M12
MPC	4930532G15Rik	P1_I6_M13
MPC	Eprs	P2_I3_M2
MPC	Cenpf	P1_I6_M5
MPC	Fam71a	P2_I3_M1
MPC	Nenf	P1_I6_M1
MPC	Tmem206	P1_I6_M14
MPC	Dtl	P1_I6_M5
MPC	Lpgat1	P1_I6_M15
MPC	Nek2	P1_I6_M3
MPC	Gm26670	P2_I3_M3
MPC	Diexf	P1_I6_M7
MPC	Plxna2	P1_I6_M12
MPC	Cdc123	P1_I6_M1
MPC	Atp5c1	P1_I6_M8
MPC	Pfkfb3	P6_I1_M1
MPC	Il15ra	P1_I6_M6
MPC	Rsu1	P1_I6_M16
MPC	Hacd1	P1_I6_M17
MPC	Mrc1	P4_I1_M1
MPC	Nsun6	P1_I6_M6
MPC	Plxdc2	P1_I6_M12
MPC	Pdss1	P1_I6_M13
MPC	Il1rn	P1_I6_M12
MPC	Dph7	P1_I6_M7
MPC	Mrpl41	P1_I6_M1
MPC	Tubb4b	P1_I6_M16
MPC	Tprn	P1_I6_M7
MPC	Ssna1	P1_I6_M16
MPC	Edf1	P1_I6_M16
MPC	Sec16a	P1_I6_M2
MPC	Notch1	P1_I6_M10
MPC	Rpl7a	P1_I6_M1
MPC	Surf4	P1_I6_M4
MPC	Cacfd1	P1_I6_M4
MPC	Col5a1	P1_I6_M9
MPC	1700007K13Rik	P1_I6_M14
MPC	2600006K01Rik	P1_I6_M14
MPC	Cercam	P1_I6_M9
MPC	Set	P1_I6_M8
MPC	Kyat1	P1_I6_M18
MPC	Ier5l	P1_I6_M18
MPC	Prrx2	P1_I6_M8
MPC	1110008P14Rik	P1_I6_M1
MPC	Lcn2	P1_I6_M11
MPC	Naif1	P1_I6_M7
MPC	Sh2d3c	P1_I6_M3
MPC	Rpl12	P2_I3_M4
MPC	Rab14	P1_I6_M15
MPC	Gsn	P1_I6_M4
MPC	Ndufa8	P1_I6_M1
MPC	Zbtb26	P2_I3_M3
MPC	Psmb7	P1_I6_M16
MPC	Rpl35	P3_I2_M1
MPC	Arhgap15	P1_I6_M3
MPC	Gtdc1	P1_I6_M18
MPC	Zeb2	P1_I6_M15
MPC	Acvr2a	P1_I6_M12
MPC	Rnd3	P2_I3_M2
MPC	Nr4a2	P1_I6_M2
MPC	Cytip	P2_I3_M3
MPC	Baz2b	P1_I6_M10
MPC	2023-03-07	P1_I6_M10
MPC	Cd302	P1_I6_M1
MPC	Rbms1	P1_I6_M12
MPC	Psmd14	P1_I6_M8
MPC	Grb14	P5_I3_M1
MPC	Galnt3	P1_I6_M2
MPC	Scn1a	P1_I6_M18
MPC	Spc25	P1_I6_M5
MPC	Fastkd1	P2_I3_M3
MPC	Ppig	P2_I3_M4
MPC	Gorasp2	P1_I6_M4
MPC	Dcaf17	P1_I6_M6
MPC	Hat1	P1_I6_M5
MPC	Itga6	P1_I6_M6
MPC	Pdk1	P6_I1_M1
MPC	Cdca7	P1_I6_M5
MPC	Ola1	P1_I6_M8
MPC	Atp5g3	P1_I6_M1
MPC	Hoxd3os1	P1_I6_M13
MPC	Hoxd8	P1_I6_M13
MPC	Mtx2	P1_I6_M8
MPC	Ttc30b	P1_I6_M3
MPC	Fkbp7	P1_I6_M4
MPC	Ccdc141	P1_I6_M6
MPC	Zfp385b	P1_I6_M2
MPC	Frzb	P1_I6_M2
MPC	Ypel4	P2_I3_M1
MPC	Timm10	P1_I6_M8
MPC	Fnbp4	P2_I3_M4
MPC	Agbl2	P2_I3_M3
MPC	Ndufs3	P1_I6_M1
MPC	Slc39a13	P1_I6_M9
MPC	Spi1	P1_I6_M11
MPC	Ddb2	P1_I6_M14
MPC	Creb3l1	P1_I6_M4
MPC	Slc35c1	P1_I6_M3
MPC	Fjx1	P1_I6_M3
MPC	Pamr1	P1_I6_M18
MPC	Depdc7	P1_I6_M14
MPC	Ccdc73	P1_I6_M6
MPC	Rcn1	P1_I6_M4
MPC	Bdnf	P1_I6_M6
MPC	Fibin	P1_I6_M2
MPC	Nop10	P1_I6_M16
MPC	BC052040	P1_I6_M13
MPC	Thbs1	P1_I6_M2
MPC	Bub1b	P1_I6_M5
MPC	Inafm2	P1_I6_M4
MPC	Knl1	P1_I6_M5
MPC	Rad51	P1_I6_M5
MPC	Exd1	P2_I3_M3
MPC	Nusap1	P1_I6_M5
MPC	Mga	P2_I3_M2
MPC	Mapkbp1	P1_I6_M13
MPC	Zfp106	P1_I6_M15
MPC	Cdan1	P1_I6_M13
MPC	Adal	P1_I6_M14
MPC	Zscan29	P1_I6_M3
MPC	Ppip5k1	P2_I3_M1
MPC	Serf2	P1_I6_M2
MPC	Hypk	P1_I6_M1
MPC	Wdr76	P1_I6_M5
MPC	Trim69	P2_I3_M1
MPC	AA467197	P1_I6_M11
MPC	Sema6d	P1_I6_M10
MPC	Dut	P1_I6_M5
MPC	Fbn1	P5_I3_M1
MPC	Cep152	P1_I6_M3
MPC	Secisbp2l	P1_I6_M15
MPC	Cops2	P1_I6_M8
MPC	Hdc	P1_I6_M11
MPC	Usp50	P3_I2_M1
MPC	Trpm7	P1_I6_M10
MPC	Ncaph	P1_I6_M5
MPC	Dusp2	P1_I6_M3
MPC	Mrps5	P1_I6_M1
MPC	Bub1	P1_I6_M5
MPC	Bcl2l11	P1_I6_M10
MPC	Gm10762	P1_I6_M13
MPC	Zc3h6	P1_I6_M3
MPC	Ckap2l	P1_I6_M5
MPC	Il1a	P1_I6_M18
MPC	Il1b	P1_I6_M14
MPC	Snrpb	P1_I6_M1
MPC	Nop56	P1_I6_M8
MPC	Mrps26	P1_I6_M1
MPC	Itpa	P1_I6_M1
MPC	Pcna	P1_I6_M5
MPC	Mcm8	P1_I6_M3
MPC	Btbd3	P1_I6_M6
MPC	Ism1	P1_I6_M12
MPC	Rrbp1	P1_I6_M2
MPC	Slc24a3	P1_I6_M3
MPC	Rin2	P1_I6_M15
MPC	Naa20	P1_I6_M1
MPC	Napb	P1_I6_M14
MPC	Gm14167	P2_I3_M3
MPC	Fkbp1a	P1_I6_M1
MPC	Trib3	P6_I1_M1
MPC	Defb25	P1_I6_M7
MPC	H13	P1_I6_M4
MPC	Cox4i2	P6_I1_M1
MPC	Tpx2	P1_I6_M5
MPC	Nol4l	P1_I6_M6
MPC	Snta1	P1_I6_M17
MPC	1700003F12Rik	P1_I6_M9
MPC	Raly	P1_I6_M1
MPC	Ahcy	P1_I6_M3
MPC	Dynlrb1	P1_I6_M1
MPC	Trp53inp2	P1_I6_M10
MPC	Trpc4ap	P2_I3_M2
MPC	Eif6	P1_I6_M1
MPC	Ergic3	P1_I6_M4
MPC	Romo1	P1_I6_M1
MPC	Rbm39	P1_I6_M10
MPC	Phf20	P2_I3_M2
MPC	2900097C17Rik	P2_I3_M2
MPC	Myl9	P5_I3_M1
MPC	Rpn2	P1_I6_M9
MPC	Lbp	P2_I3_M1
MPC	Actr5	P1_I6_M3
MPC	Fam83d	P1_I6_M3
MPC	Mybl2	P1_I6_M5
MPC	2900093K20Rik	P1_I6_M3
MPC	Ttpal	P1_I6_M6
MPC	Wisp2	P5_I3_M1
MPC	Ywhab	P1_I6_M1
MPC	Dbndd2	P1_I6_M7
MPC	Pigt	P1_I6_M4
MPC	Ube2c	P1_I6_M5
MPC	Neurl2	P6_I1_M1
MPC	Ctsa	P1_I6_M9
MPC	Cd40	P2_I3_M1
MPC	Prex1	P1_I6_M2
MPC	Trp53rkb	P1_I6_M3
MPC	Znfx1	P1_I6_M7
MPC	Kcnb1	P1_I6_M2
MPC	Ptgis	P1_I6_M2
MPC	Snai1	P1_I6_M9
MPC	Cebpb	P1_I6_M10
MPC	1200007C13Rik	P1_I6_M6
MPC	Adnp	P1_I6_M3
MPC	Zfp217	P1_I6_M3
MPC	Pfdn4	P1_I6_M1
MPC	Aurka	P1_I6_M5
MPC	Rbm38	P1_I6_M3
MPC	Pmepa1	P2_I3_M2
MPC	Pmepa1os	P2_I3_M1
MPC	Gnas	P1_I6_M2
MPC	Atp5e	P1_I6_M16
MPC	Gm4631	P1_I6_M6
MPC	Gm14418	P1_I6_M14
MPC	Psma7	P1_I6_M1
MPC	Col20a1	P1_I6_M18
MPC	Ppdpf	P5_I3_M1
MPC	Usp27x	P1_I6_M3
MPC	Ppp1r3f	P1_I6_M14
MPC	Plp2	P1_I6_M1
MPC	Pim2	P1_I6_M18
MPC	Slc35a2	P1_I6_M2
MPC	Pqbp1	P1_I6_M16
MPC	Hdac6	P1_I6_M6
MPC	Was	P2_I3_M1
MPC	Rbm3	P1_I6_M8
MPC	Cybb	P1_I6_M11
MPC	Srpx	P1_I6_M4
MPC	Rpgr	P2_I3_M1
MPC	Usp9x	P1_I6_M10
MPC	Ddx3x	P1_I6_M15
MPC	Jade3	P1_I6_M6
MPC	Il13ra1	P1_I6_M7
MPC	Lonrf3	P1_I6_M3
MPC	Slc25a5	P1_I6_M8
MPC	Rnf113a1	P1_I6_M6
MPC	Lamp2	P1_I6_M15
MPC	Apln	P6_I1_M1
MPC	Hprt	P1_I6_M1
MPC	Zfp449	P1_I6_M7
MPC	Ints6l	P1_I6_M18
MPC	Fmr1	P1_I6_M10
MPC	Bcap31	P1_I6_M17
MPC	Ssr4	P1_I6_M4
MPC	Naa10	P1_I6_M1
MPC	Flna	P5_I3_M1
MPC	Atp6ap1	P1_I6_M4
MPC	Lage3	P1_I6_M8
MPC	Ubl4a	P1_I6_M16
MPC	Dkc1	P1_I6_M8
MPC	Vbp1	P1_I6_M8
MPC	Rab39b	P1_I6_M6
MPC	Pls3	P1_I6_M4
MPC	Pola1	P1_I6_M5
MPC	Pdk3	P6_I1_M1
MPC	Klhl15	P1_I6_M3
MPC	Maged1	P1_I6_M4
MPC	Gspt2	P1_I6_M7
MPC	Arhgef9	P2_I3_M3
MPC	F630028O10Rik	P1_I6_M11
MPC	Pdzd11	P1_I6_M1
MPC	Slc7a3	P1_I6_M13
MPC	Foxo4	P1_I6_M3
MPC	Ogt	P1_I6_M10
MPC	Rtl5	P2_I3_M3
MPC	Ercc6l	P1_I6_M6
MPC	Rps4x	P1_I6_M9
MPC	Chic1	P2_I3_M1
MPC	Jpx	P2_I3_M3
MPC	Pbdc1	P1_I6_M8
MPC	Atrx	P1_I6_M15
MPC	Magt1	P1_I6_M9
MPC	Cox7b	P1_I6_M16
MPC	Pgk1	P1_I6_M9
MPC	Sh3bgrl	P1_I6_M15
MPC	Hdx	P1_I6_M14
MPC	Cenpi	P1_I6_M5
MPC	Timm8a1	P1_I6_M1
MPC	Rpl36a	P1_I6_M1
MPC	Tceal8	P1_I6_M16
MPC	Tceal9	P1_I6_M4
MPC	Bex3	P5_I3_M1
MPC	Plp1	P1_I6_M6
MPC	Rnf128	P4_I1_M1
MPC	Atg4a	P1_I6_M7
MPC	Chrdl1	P1_I6_M12
MPC	Wnk3	P1_I6_M13
MPC	Shroom2	P1_I6_M6
MPC	Phex	P1_I6_M2
MPC	Eif1ax	P1_I6_M1
MPC	Bclaf3	P1_I6_M7
MPC	Sh3kbp1	P5_I3_M1
MPC	Pdha1	P1_I6_M16
MPC	Phka2	P1_I6_M3
MPC	Nhs	P1_I6_M6
MPC	Rbbp7	P1_I6_M1
MPC	Vegfd	P1_I6_M3
MPC	Gpm6b	P1_I6_M12
MPC	Tceanc	P1_I6_M6
MPC	Tmsb4x	P1_I6_M12
MPC	Prps2	P1_I6_M7
MPC	Gm21887	P1_I6_M3
MPC	2700069I18Rik	P1_I6_M14
MPC	Zfhx4	P1_I6_M12
MPC	Zc2hc1a	P1_I6_M12
MPC	Il7	P2_I3_M3
MPC	Gm16685	P1_I6_M18
MPC	Mrps28	P1_I6_M1
MPC	Pag1	P1_I6_M3
MPC	Chmp4c	P1_I6_M2
MPC	1810022K09Rik	P1_I6_M1
MPC	Ythdf3	P1_I6_M15
MPC	Gm43672	P1_I6_M3
MPC	Ect2	P1_I6_M5
MPC	Fndc3b	P2_I3_M2
MPC	Pld1	P1_I6_M13
MPC	Rpl22l1	P3_I2_M1
MPC	Skil	P1_I6_M10
MPC	Ndufb5	P1_I6_M1
MPC	Dnajc19	P1_I6_M1
MPC	Ccna2	P1_I6_M5
MPC	Cetn4	P2_I3_M3
MPC	Nudt6	P1_I6_M7
MPC	Spry1	P1_I6_M12
MPC	Pcdh10	P2_I3_M1
MPC	Slc7a11	P1_I6_M11
MPC	Mgarp	P6_I1_M1
MPC	Ndufc1	P1_I6_M1
MPC	Mgst2	P1_I6_M11
MPC	Foxo1	P1_I6_M2
MPC	Ufm1	P1_I6_M17
MPC	Alg5	P1_I6_M1
MPC	Tm4sf1	P1_I6_M1
MPC	Commd2	P1_I6_M1
MPC	Tsc22d2	P1_I6_M10
MPC	Serp1	P1_I6_M17
MPC	Mbnl1	P2_I3_M2
MPC	Ssr3	P1_I6_M2
MPC	Ccnl1	P1_I6_M10
MPC	Gm37305	P1_I6_M13
MPC	Ptx3	P5_I3_M1
MPC	Shox2	P1_I6_M2
MPC	Lxn	P5_I3_M1
MPC	Kpna4	P2_I3_M2
MPC	Ppm1l	P1_I6_M6
MPC	Golim4	P1_I6_M4
MPC	Ctso	P1_I6_M12
MPC	Gucy1a1	P1_I6_M2
MPC	Tmem131l	P1_I6_M3
MPC	Arfip1	P1_I6_M17
MPC	Gatb	P1_I6_M12
MPC	Mab21l2	P1_I6_M12
MPC	Dclk2	P1_I6_M6
MPC	Cd1d1	P1_I6_M2
MPC	Hdgf	P1_I6_M8
MPC	Gpatch4	P1_I6_M16
MPC	Mef2d	P2_I3_M2
MPC	Cct3	P1_I6_M16
MPC	Bglap3	P1_I6_M2
MPC	Bglap	P1_I6_M2
MPC	Lamtor2	P1_I6_M16
MPC	Ssr2	P1_I6_M4
MPC	Ash1l	P2_I3_M4
MPC	Gba	P1_I6_M4
MPC	Trim46	P1_I6_M3
MPC	Krtcap2	P1_I6_M17
MPC	Efna1	P1_I6_M2
MPC	Efna3	P1_I6_M13
MPC	Cks1b	P1_I6_M8
MPC	Atp8b2	P1_I6_M4
MPC	Hax1	P1_I6_M17
MPC	Rps27	P3_I2_M1
MPC	Slc27a3	P1_I6_M9
MPC	S100a13	P1_I6_M16
MPC	S100a16	P1_I6_M16
MPC	S100a3	P1_I6_M3
MPC	S100a6	P1_I6_M16
MPC	S100a8	P1_I6_M11
MPC	S100a9	P1_I6_M11
MPC	Tchh	P1_I6_M3
MPC	S100a11	P1_I6_M16
MPC	Psmb4	P1_I6_M16
MPC	Selenbp1	P6_I1_M1
MPC	Pi4kb	P1_I6_M7
MPC	Tnfaip8l2	P2_I3_M1
MPC	Arnt	P2_I3_M2
MPC	Ctss	P4_I1_M1
MPC	Mrps21	P1_I6_M16
MPC	C920021L13Rik	P1_I6_M6
MPC	Sf3b4	P1_I6_M1
MPC	Bola1	P1_I6_M1
MPC	Hist2h2ac	P1_I6_M3
MPC	Gm20632	P1_I6_M18
MPC	Hist2h4	P1_I6_M3
MPC	Gm42743	P1_I6_M13
MPC	Hist2h2bb	P1_I6_M3
MPC	Rbm8a	P1_I6_M1
MPC	Itga10	P1_I6_M4
MPC	Fmo5	P1_I6_M6
MPC	Pde4dip	P1_I6_M2
MPC	Sec22b	P1_I6_M4
MPC	Zfp697	P1_I6_M18
MPC	Fam46c	P1_I6_M4
MPC	Ptgfrn	P1_I6_M4
MPC	Atp1a1	P1_I6_M4
MPC	Csde1	P2_I3_M2
MPC	Olfml3	P1_I6_M4
MPC	Hipk1	P2_I3_M2
MPC	Rhoc	P1_I6_M1
MPC	Rap1a	P1_I6_M8
MPC	Chil3	P1_I6_M11
MPC	Amigo1	P1_I6_M13
MPC	Psma5	P1_I6_M1
MPC	Tmem167b	P6_I1_M1
MPC	Vav3	P1_I6_M3
MPC	Col11a1	P1_I6_M2
MPC	Vcam1	P1_I6_M12
MPC	Rwdd3	P1_I6_M14
MPC	Tmem56	P2_I3_M1
MPC	Cnn3	P5_I3_M1
MPC	Synpo2	P2_I3_M1
MPC	Sec24d	P1_I6_M4
MPC	Arsj	P1_I6_M7
MPC	Camk2d	P1_I6_M10
MPC	Alpk1	P1_I6_M13
MPC	Tifa	P1_I6_M14
MPC	Gar1	P1_I6_M1
MPC	Ostc	P1_I6_M17
MPC	Sgms2	P1_I6_M4
MPC	Aimp1	P1_I6_M1
MPC	Tet2	P1_I6_M10
MPC	Cenpe	P1_I6_M5
MPC	Bdh2	P1_I6_M14
MPC	Slc39a8	P1_I6_M13
MPC	Ppp3ca	P2_I3_M2
MPC	Gm567	P2_I3_M1
MPC	H2afz	P1_I6_M5
MPC	Mttp	P1_I6_M6
MPC	Adh5	P1_I6_M1
MPC	Eif4e	P1_I6_M8
MPC	Gbp5	P2_I3_M1
MPC	Gbp7	P1_I6_M7
MPC	Gbp3	P2_I3_M1
MPC	Gbp2b	P1_I6_M7
MPC	Gbp2	P1_I6_M7
MPC	Lmo4	P1_I6_M12
MPC	Selenof	P1_I6_M17
MPC	Col24a1	P1_I6_M2
MPC	Znhit6	P1_I6_M1
MPC	Ddah1	P1_I6_M8
MPC	Lpar3	P1_I6_M2
MPC	Ptgfr	P1_I6_M12
MPC	Fubp1	P2_I3_M4
MPC	Miga1	P1_I6_M13
MPC	Ak5	P1_I6_M14
MPC	Pigk	P1_I6_M17
MPC	Srsf11	P1_I6_M10
MPC	Plag1	P2_I3_M3
MPC	Sdcbp	P4_I1_M1
MPC	Rab2a	P1_I6_M17
MPC	Trp53inp1	P1_I6_M15
MPC	Rbm12b2	P1_I6_M14
MPC	Faxc	P2_I3_M1
MPC	Mms22l	P1_I6_M3
MPC	Ndufaf4	P1_I6_M8
MPC	Ankrd6	P1_I6_M2
MPC	Zfp292	P1_I6_M10
MPC	Ddx58	P1_I6_M7
MPC	Topors	P1_I6_M15
MPC	Smim27	P3_I2_M1
MPC	Ndufb6	P1_I6_M1
MPC	Bag1	P1_I6_M1
MPC	Chmp5	P1_I6_M17
MPC	Dctn3	P1_I6_M1
MPC	Ccl27a	P1_I6_M18
MPC	Dnajb5	P1_I6_M14
MPC	Vcp	P2_I3_M4
MPC	Fancg	P2_I3_M3
MPC	Stoml2	P1_I6_M1
MPC	AL732506.1	P1_I6_M3
MPC	Car9	P6_I1_M1
MPC	Tpm2	P5_I3_M1
MPC	Creb3	P1_I6_M17
MPC	Gba2	P1_I6_M3
MPC	Tmem8b	P1_I6_M6
MPC	Melk	P1_I6_M5
MPC	Zcchc7	P1_I6_M10
MPC	Grhpr	P1_I6_M4
MPC	Zbtb5	P1_I6_M3
MPC	Polr1e	P1_I6_M8
MPC	Tomm5	P1_I6_M16
MPC	Shb	P1_I6_M6
MPC	Trmo	P2_I3_M1
MPC	Anp32b	P1_I6_M8
MPC	Nans	P1_I6_M17
MPC	Anks6	P2_I3_M3
MPC	Col15a1	P6_I1_M1
MPC	Sec61b	P1_I6_M17
MPC	Erp44	P1_I6_M17
MPC	Mrpl50	P1_I6_M1
MPC	Tmem246	P2_I3_M3
MPC	Smc2	P1_I6_M5
MPC	Nipsnap3b	P1_I6_M1
MPC	Slc44a1	P1_I6_M4
MPC	Rad23b	P1_I6_M1
MPC	Klf4	P1_I6_M9
MPC	Tmem245	P1_I6_M6
MPC	Ptpn3	P2_I3_M1
MPC	Txn1	P1_I6_M16
MPC	Svep1	P1_I6_M12
MPC	AI314180	P2_I3_M4
MPC	Dnajc25	P1_I6_M17
MPC	Ptbp3	P2_I3_M4
MPC	Cdc26	P1_I6_M17
MPC	Pole3	P1_I6_M1
MPC	Col27a1	P2_I3_M1
MPC	Orm1	P1_I6_M11
MPC	Akna	P1_I6_M6
MPC	Whrn	P1_I6_M2
MPC	Ptprd	P2_I3_M2
MPC	Ttc39b	P2_I3_M2
MPC	Bnc2	P2_I3_M1
MPC	Haus6	P1_I6_M5
MPC	Mtap	P1_I6_M8
MPC	Jun	P1_I6_M10
MPC	Nfia	P1_I6_M12
MPC	Pgm2	P1_I6_M9
MPC	Ror1	P1_I6_M18
MPC	E130102H24Rik	P1_I6_M3
MPC	Ak4	P6_I1_M1
MPC	Lepr	P1_I6_M12
MPC	Mier1	P2_I3_M4
MPC	Plpp3	P1_I6_M12
MPC	Tmem59	P1_I6_M4
MPC	Lrp8	P2_I3_M1
MPC	Scp2	P1_I6_M12
MPC	Gpx7	P1_I6_M4
MPC	Zcchc11	P1_I6_M10
MPC	Rnf11	P1_I6_M9
MPC	Cdkn2c	P1_I6_M5
MPC	Stil	P2_I3_M1
MPC	Mob3c	P1_I6_M13
MPC	Rad54l	P2_I3_M1
MPC	Ipp	P1_I6_M18
MPC	Nasp	P1_I6_M5
MPC	Akr1a1	P1_I6_M17
MPC	Tesk2	P1_I6_M7
MPC	Eif2b3	P1_I6_M8
MPC	Ptprf	P1_I6_M9
MPC	Cdc20	P1_I6_M5
MPC	Ebna1bp2	P1_I6_M8
MPC	Slc2a1	P6_I1_M1
MPC	P3h1	P1_I6_M4
MPC	Ybx1	P1_I6_M1
MPC	Frg2f1	P2_I3_M3
MPC	Bmp8b	P1_I6_M2
MPC	Pabpc4	P1_I6_M4
MPC	Bmp8a	P1_I6_M2
MPC	Macf1	P1_I6_M2
MPC	Ndufs5	P1_I6_M16
MPC	Akirin1	P1_I6_M2
MPC	Rhbdl2	P1_I6_M2
MPC	Cdca8	P1_I6_M5
MPC	9930104L06Rik	P1_I6_M6
MPC	Csf3r	P2_I3_M1
MPC	Oscp1	P1_I6_M3
MPC	Stk40	P1_I6_M2
MPC	Eva1b	P1_I6_M1
MPC	Tekt2	P2_I3_M1
MPC	Clspn	P1_I6_M5
MPC	Psmb2	P1_I6_M1
MPC	Zmym6	P1_I6_M3
MPC	Gjb4	P2_I3_M1
MPC	Zscan20	P2_I3_M3
MPC	Ak2	P1_I6_M8
MPC	Gm26722	P1_I6_M6
MPC	Zbtb8a	P2_I3_M1
MPC	Eif3i	P1_I6_M1
MPC	Tmem234	P1_I6_M1
MPC	Tinagl1	P1_I6_M14
MPC	Fabp3	P1_I6_M2
MPC	Sdc3	P1_I6_M2
MPC	Laptm5	P4_I1_M1
MPC	Atpif1	P1_I6_M16
MPC	Rpa2	P1_I6_M5
MPC	Gm26615	P1_I6_M6
MPC	Fam46b	P1_I6_M3
MPC	Nudc	P1_I6_M1
MPC	Gpatch3	P1_I6_M6
MPC	Rps6ka1	P1_I6_M14
MPC	Cd52	P1_I6_M11
MPC	Sh3bgrl3	P1_I6_M16
MPC	Stmn1	P1_I6_M5
MPC	Tmem57	P1_I6_M2
MPC	Rsrp1	P1_I6_M3
MPC	Gm16225	P1_I6_M14
MPC	E2f2	P2_I3_M1
MPC	Htr1d	P1_I6_M6
MPC	C1qb	P4_I1_M1
MPC	C1qc	P4_I1_M1
MPC	C1qa	P4_I1_M1
MPC	Cdc42	P1_I6_M1
MPC	Hspg2	P1_I6_M9
MPC	Alpl	P1_I6_M2
MPC	Ddost	P1_I6_M17
MPC	Tmco4	P1_I6_M18
MPC	Minos1	P1_I6_M16
MPC	Capzb	P1_I6_M17
MPC	2700016F22Rik	P1_I6_M14
MPC	Sdhb	P1_I6_M1
MPC	Szrd1	P1_I6_M1
MPC	Hspb7	P1_I6_M9
MPC	Ddi2	P2_I3_M2
MPC	Kazn	P1_I6_M6
MPC	Prdm2	P1_I6_M10
MPC	Zfp979	P1_I6_M3
MPC	Miip	P1_I6_M14
MPC	Plod1	P1_I6_M9
MPC	Mad2l2	P1_I6_M16
MPC	Fbxo44	P1_I6_M18
MPC	Ubiad1	P1_I6_M7
MPC	Srm	P1_I6_M1
MPC	Gm13205	P1_I6_M13
MPC	Ube4b	P1_I6_M17
MPC	Eno1	P1_I6_M17
MPC	Errfi1	P1_I6_M10
MPC	Park7	P1_I6_M16
MPC	Kcnab2	P1_I6_M7
MPC	Megf6	P1_I6_M9
MPC	Pex10	P1_I6_M6
MPC	Morn1	P2_I3_M1
MPC	Ski	P2_I3_M4
MPC	Mmp23	P1_I6_M4
MPC	Vwa1	P6_I1_M1
MPC	Mrpl20	P1_I6_M1
MPC	Ccnl2	P1_I6_M10
MPC	Mxra8	P1_I6_M4
MPC	Sdf4	P1_I6_M4
MPC	Agrn	P1_I6_M2
MPC	1700109H08Rik	P1_I6_M18
MPC	2510017J16Rik	P1_I6_M14
MPC	Pex1	P1_I6_M6
MPC	Gatad1	P1_I6_M1
MPC	Mterf1a	P1_I6_M3
MPC	Akap9	P2_I3_M2
MPC	Cfap69	P2_I3_M1
MPC	Sri	P1_I6_M1
MPC	Dbf4	P1_I6_M5
MPC	Slc25a40	P1_I6_M13
MPC	Cd36	P4_I1_M1
MPC	A630072M18Rik	P1_I6_M3
MPC	Kmt2e	P2_I3_M2
MPC	Tomm7	P1_I6_M16
MPC	2700038G22Rik	P1_I6_M13
MPC	Nupl2	P1_I6_M3
MPC	Wdr86	P2_I3_M3
MPC	Rheb	P1_I6_M8
MPC	1700096K18Rik	P1_I6_M14
MPC	Tyms	P1_I6_M5
MPC	Ost4	P1_I6_M17
MPC	Cgref1	P1_I6_M4
MPC	Slc5a6	P1_I6_M7
MPC	AI839979	P1_I6_M7
MPC	Mrpl33	P1_I6_M16
MPC	Plb1	P1_I6_M18
MPC	Ppp1cb	P2_I3_M4
MPC	Gm15614	P1_I6_M6
MPC	Ywhah	P1_I6_M8
MPC	Maea	P2_I3_M4
MPC	Tacc3	P1_I6_M5
MPC	Fgfr3	P1_I6_M2
MPC	Sh3bp2	P1_I6_M6
MPC	Grk4	P1_I6_M7
MPC	Rgs12	P1_I6_M2
MPC	Trmt44	P1_I6_M3
MPC	Htra3	P1_I6_M4
MPC	Sorcs2	P1_I6_M2
MPC	Mrfap1	P1_I6_M1
MPC	Nsg1	P1_I6_M16
MPC	Lyar	P1_I6_M8
MPC	Slc2a9	P1_I6_M7
MPC	Wdr1	P1_I6_M8
MPC	Bod1l	P2_I3_M4
MPC	Gm16223	P1_I6_M6
MPC	Ncapg	P1_I6_M5
MPC	Pcdh7	P1_I6_M2
MPC	Rell1	P1_I6_M9
MPC	Tlr6	P1_I6_M18
MPC	Fam114a1	P1_I6_M4
MPC	Smim14	P1_I6_M2
MPC	Limch1	P1_I6_M12
MPC	Atp8a1	P1_I6_M3
MPC	Rasl11b	P1_I6_M3
MPC	Fip1l1	P1_I6_M10
MPC	Kit	P1_I6_M10
MPC	Tmem165	P1_I6_M8
MPC	Paics	P1_I6_M8
MPC	Rest	P2_I3_M4
MPC	Stap1	P1_I6_M13
MPC	Utp3	P2_I3_M4
MPC	Ankrd17	P2_I3_M4
MPC	Pf4	P4_I1_M1
MPC	Uso1	P1_I6_M2
MPC	Ccni	P1_I6_M9
MPC	2010109A12Rik	P1_I6_M6
MPC	Anxa3	P1_I6_M8
MPC	Bmp2k	P2_I3_M2
MPC	Antxr2	P1_I6_M4
MPC	Bmp3	P1_I6_M4
MPC	Hnrnpdl	P2_I3_M4
MPC	Enoph1	P1_I6_M3
MPC	Sec31a	P1_I6_M2
MPC	Cops4	P1_I6_M17
MPC	Helq	P2_I3_M1
MPC	Gpat3	P2_I3_M1
MPC	Nudt9	P1_I6_M1
MPC	Dmp1	P1_I6_M2
MPC	Ibsp	P1_I6_M2
MPC	Mepe	P1_I6_M2
MPC	Cdc7	P2_I3_M3
MPC	Tgfbr3	P1_I6_M12
MPC	Atp5k	P3_I2_M1
MPC	Idua	P1_I6_M7
MPC	5430403G16Rik	P1_I6_M14
MPC	Gm15446	P2_I3_M3
MPC	Zfp605	P1_I6_M14
MPC	Pole	P1_I6_M5
MPC	P2rx2	P1_I6_M14
MPC	Mn1	P1_I6_M6
MPC	Tpst2	P1_I6_M1
MPC	Iscu	P1_I6_M16
MPC	Tmem119	P1_I6_M4
MPC	Myo1h	P1_I6_M7
MPC	Oasl2	P1_I6_M7
MPC	Srsf9	P1_I6_M1
MPC	Msi1	P1_I6_M2
MPC	1110006O24Rik	P1_I6_M3
MPC	Pebp1	P1_I6_M17
MPC	Vsig10	P1_I6_M7
MPC	Rfc5	P1_I6_M5
MPC	Med13l	P2_I3_M2
MPC	Erp29	P1_I6_M2
MPC	Acad10	P1_I6_M18
MPC	Rad9b	P1_I6_M18
MPC	Vps29	P1_I6_M1
MPC	P2rx7	P1_I6_M7
MPC	AI480526	P2_I3_M1
MPC	4932422M17Rik	P1_I6_M6
MPC	Kntc1	P1_I6_M5
MPC	Hcar2	P1_I6_M11
MPC	Denr	P1_I6_M8
MPC	Abcb9	P1_I6_M14
MPC	Pitpnm2	P1_I6_M13
MPC	Mphosph9	P1_I6_M3
MPC	Sbno1	P2_I3_M2
MPC	Tmed2	P1_I6_M17
MPC	Ran	P1_I6_M8
MPC	Adgrd1	P1_I6_M2
MPC	Mrps17	P1_I6_M16
MPC	Phkg1	P2_I3_M1
MPC	Zbed5	P1_I6_M10
MPC	Asl	P1_I6_M7
MPC	Ncf1	P1_I6_M2
MPC	Gtf2i	P1_I6_M2
MPC	Limk1	P1_I6_M7
MPC	Stx1a	P2_I3_M3
MPC	Bud23	P1_I6_M1
MPC	Hip1	P1_I6_M4
MPC	Por	P4_I1_M1
MPC	Mdh2	P1_I6_M1
MPC	Hspb1	P1_I6_M6
MPC	Polr2j	P1_I6_M16
MPC	Plod3	P1_I6_M17
MPC	Ap1s1	P1_I6_M1
MPC	Pop7	P1_I6_M16
MPC	Gnb2	P1_I6_M1
MPC	Tfr2	P2_I3_M1
MPC	Cops6	P1_I6_M1
MPC	Mcm7	P1_I6_M5
MPC	Taf6	P1_I6_M7
MPC	A430033K04Rik	P1_I6_M7
MPC	Pdgfa	P1_I6_M4
MPC	C130050O18Rik	P1_I6_M14
MPC	Zfand2a	P1_I6_M6
MPC	Elfn1	P1_I6_M6
MPC	Brat1	P1_I6_M18
MPC	Tnrc18	P1_I6_M15
MPC	Actb	P5_I3_M1
MPC	Rbak	P2_I3_M1
MPC	0610040B10Rik	P2_I3_M1
MPC	Kdelr2	P1_I6_M4
MPC	Eif2ak1	P1_I6_M7
MPC	Aimp2	P1_I6_M1
MPC	Lmtk2	P1_I6_M6
MPC	Arpc1b	P1_I6_M16
MPC	Pdap1	P1_I6_M1
MPC	Atp5j2	P1_I6_M1
MPC	Zkscan5	P1_I6_M6
MPC	D5Ertd605e	P1_I6_M3
MPC	Pomp	P1_I6_M1
MPC	Hmgb1	P1_I6_M8
MPC	Alox5ap	P1_I6_M11
MPC	Hsph1	P1_I6_M8
MPC	Col1a2	P1_I6_M2
MPC	Pdk4	P2_I3_M2
MPC	Sem1	P1_I6_M16
MPC	Asns	P1_I6_M17
MPC	Rpa3	P1_I6_M16
MPC	Glcci1	P1_I6_M6
MPC	Ndufa4	P1_I6_M16
MPC	Thsd7a	P1_I6_M7
MPC	Mdfic	P1_I6_M15
MPC	Tfec	P1_I6_M3
MPC	Cav1	P1_I6_M8
MPC	Met	P1_I6_M6
MPC	Capza2	P1_I6_M1
MPC	Lsm8	P1_I6_M8
MPC	Fam3c	P1_I6_M1
MPC	Ptprz1	P1_I6_M2
MPC	Ndufa5	P1_I6_M16
MPC	Wasl	P1_I6_M2
MPC	Zfp800	P1_I6_M7
MPC	Snd1	P1_I6_M17
MPC	Calu	P1_I6_M4
MPC	Irf5	P1_I6_M7
MPC	Cald1	P1_I6_M15
MPC	Fmc1	P1_I6_M1
MPC	Luc7l2	P1_I6_M10
MPC	Gm26699	P1_I6_M6
MPC	Tbxas1	P1_I6_M7
MPC	Mkrn1	P1_I6_M3
MPC	Ndufb2	P1_I6_M16
MPC	Ssbp1	P1_I6_M1
MPC	Zyx	P1_I6_M8
MPC	Tcaf2	P1_I6_M14
MPC	Ezh2	P1_I6_M5
MPC	Pdia4	P1_I6_M4
MPC	Atp6v0e2	P1_I6_M7
MPC	Tmem176b	P1_I6_M12
MPC	Tmem176a	P1_I6_M12
MPC	Gpnmb	P4_I1_M1
MPC	Tra2a	P1_I6_M10
MPC	Mpp6	P1_I6_M8
MPC	Gsdme	P1_I6_M6
MPC	Osbpl3	P1_I6_M3
MPC	Cycs	P1_I6_M8
MPC	Hoxa1	P1_I6_M14
MPC	Hoxaas3	P2_I3_M1
MPC	Fkbp14	P1_I6_M4
MPC	Nod1	P1_I6_M7
MPC	Gars	P1_I6_M17
MPC	Lsm5	P1_I6_M16
MPC	Fkbp9	P1_I6_M4
MPC	Ppm1k	P1_I6_M14
MPC	Abcg2	P1_I6_M8
MPC	Mad2l1	P1_I6_M5
MPC	Gng12	P1_I6_M8
MPC	Serbp1	P1_I6_M8
MPC	Rmnd5a	P1_I6_M10
MPC	Mrpl35	P1_I6_M1
MPC	Immt	P1_I6_M1
MPC	St3gal5	P1_I6_M2
MPC	Capg	P1_I6_M1
MPC	Tmsb10	P3_I2_M1
MPC	Suclg1	P1_I6_M1
MPC	Hk2	P1_I6_M10
MPC	Loxl3	P1_I6_M1
MPC	Mthfd2	P1_I6_M4
MPC	Bola3	P1_I6_M1
MPC	Actg2	P5_I3_M1
MPC	Tex261	P1_I6_M8
MPC	Nagk	P1_I6_M1
MPC	Snrpg	P1_I6_M16
MPC	1600020E01Rik	P1_I6_M6
MPC	Snrnp27	P1_I6_M1
MPC	Gmcl1	P1_I6_M7
MPC	Nfu1	P1_I6_M1
MPC	Gfpt1	P1_I6_M17
MPC	Antxr1	P1_I6_M15
MPC	Arhgap25	P1_I6_M3
MPC	Aplf	P1_I6_M6
MPC	Cnbp	P1_I6_M8
MPC	Copg1	P1_I6_M17
MPC	Rpn1	P1_I6_M4
MPC	Ruvbl1	P1_I6_M8
MPC	Sec61a1	P1_I6_M4
MPC	Mcm2	P1_I6_M5
MPC	Aldh1l1	P1_I6_M3
MPC	Hdac11	P2_I3_M1
MPC	Mrps25	P1_I6_M1
MPC	Prickle2	P1_I6_M18
MPC	A730049H05Rik	P1_I6_M18
MPC	Uba3	P1_I6_M1
MPC	Arl6ip5	P1_I6_M8
MPC	Gm20696	P1_I6_M6
MPC	Gxylt2	P1_I6_M2
MPC	Ppp4r2	P2_I3_M2
MPC	Bhlhe40	P1_I6_M9
MPC	Edem1	P1_I6_M9
MPC	Ogg1	P1_I6_M7
MPC	Camk1	P1_I6_M17
MPC	Creld1	P1_I6_M4
MPC	Brk1	P1_I6_M1
MPC	Sec13	P1_I6_M17
MPC	Plxnd1	P1_I6_M12
MPC	Zfand4	P2_I3_M1
MPC	Cxcl12	P1_I6_M12
MPC	Hnrnpf	P1_I6_M8
MPC	Rasgef1a	P1_I6_M3
MPC	Ret	P1_I6_M14
MPC	Cacna1c	P2_I3_M1
MPC	Kdm5a	P1_I6_M10
MPC	Hdhd5	P2_I3_M3
MPC	Mical3	P1_I6_M10
MPC	Pex26	P1_I6_M3
MPC	C3ar1	P4_I1_M1
MPC	Clec4n	P2_I3_M3
MPC	Clec4d	P4_I1_M1
MPC	Clec4e	P1_I6_M11
MPC	C1rl	P1_I6_M14
MPC	C1ra	P1_I6_M3
MPC	Phb2	P1_I6_M1
MPC	Grcc10	P3_I2_M1
MPC	Eno2	P6_I1_M1
MPC	Tpi1	P1_I6_M9
MPC	Cdca3	P1_I6_M5
MPC	Mlf2	P1_I6_M1
MPC	Pianp	P1_I6_M7
MPC	Acrbp	P1_I6_M18
MPC	Chd4	P2_I3_M4
MPC	Nop2	P1_I6_M16
MPC	Gapdh	P1_I6_M9
MPC	Ncapd2	P1_I6_M5
MPC	Mrpl51	P1_I6_M1
MPC	Vamp1	P1_I6_M3
MPC	Gm28809	P1_I6_M6
MPC	Rad51ap1	P1_I6_M5
MPC	Tspan11	P1_I6_M2
MPC	Nrip2	P1_I6_M14
MPC	Fkbp4	P1_I6_M8
MPC	Magohb	P1_I6_M8
MPC	Ybx3	P1_I6_M8
MPC	Lrp6	P2_I3_M2
MPC	Gpr19	P1_I6_M3
MPC	Plbd1	P1_I6_M11
MPC	Hist4h4	P1_I6_M3
MPC	H2afj	P1_I6_M12
MPC	BC049715	P1_I6_M13
MPC	Arhgdib	P1_I6_M11
MPC	Rerg	P1_I6_M2
MPC	Recql	P1_I6_M3
MPC	Golt1b	P1_I6_M17
MPC	Cmas	P1_I6_M4
MPC	Ppfibp1	P2_I3_M2
MPC	Ergic2	P1_I6_M17
MPC	Dennd5b	P1_I6_M10
MPC	Etfbkmt	P1_I6_M13
MPC	Myadm	P5_I3_M1
MPC	Ndufa3	P3_I2_M1
MPC	Tsen34	P1_I6_M1
MPC	Leng9	P1_I6_M3
MPC	Ube2s	P1_I6_M1
MPC	Ssc5d	P1_I6_M14
MPC	Peg3	P2_I3_M1
MPC	Zfp606	P1_I6_M14
MPC	Rnf225	P1_I6_M6
MPC	Dhx34	P1_I6_M7
MPC	Sae1	P1_I6_M8
MPC	Pglyrp1	P1_I6_M11
MPC	Six5	P1_I6_M18
MPC	Snrpd2	P1_I6_M1
MPC	Vasp	P1_I6_M1
MPC	Fosb	P1_I6_M2
MPC	Ercc1	P1_I6_M16
MPC	Ppp1r13l	P6_I1_M1
MPC	Gemin7	P1_I6_M1
MPC	Gm26890	P2_I3_M1
MPC	Apoe	P4_I1_M1
MPC	Tomm40	P1_I6_M8
MPC	Gm16174	P1_I6_M14
MPC	Zfp112	P2_I3_M1
MPC	Zfp94	P2_I3_M3
MPC	Rabac1	P6_I1_M1
MPC	Zfp574	P1_I6_M3
MPC	Pafah1b3	P6_I1_M1
MPC	B3gnt8	P1_I6_M3
MPC	Tmem91	P1_I6_M6
MPC	Tgfb1	P1_I6_M4
MPC	Axl	P5_I3_M1
MPC	Rab4b	P1_I6_M3
MPC	BC024978	P1_I6_M3
MPC	Akt2	P1_I6_M4
MPC	Ttc9b	P1_I6_M6
MPC	Map3k10	P6_I1_M1
MPC	Zfp607b	P1_I6_M14
MPC	Zfp60	P2_I3_M1
MPC	Zfp626	P1_I6_M18
MPC	Zfp607a	P1_I6_M18
MPC	Zfp780b	P1_I6_M7
MPC	Psmc4	P1_I6_M1
MPC	Fbl	P1_I6_M8
MPC	Zfp36	P1_I6_M10
MPC	Gmfg	P1_I6_M11
MPC	Rinl	P1_I6_M14
MPC	Ech1	P1_I6_M1
MPC	Eif3k	P1_I6_M1
MPC	Psmd8	P1_I6_M1
MPC	Yif1b	P1_I6_M4
MPC	Zfp383	P1_I6_M14
MPC	Zfp74	P1_I6_M18
MPC	Zfp382	P1_I6_M14
MPC	Gm5113	P1_I6_M18
MPC	Cox7a1	P6_I1_M1
MPC	Capns1	P1_I6_M16
MPC	Tbcb	P1_I6_M16
MPC	Polr2i	P1_I6_M8
MPC	Sdhaf1	P1_I6_M16
MPC	Tyrobp	P4_I1_M1
MPC	Hcst	P1_I6_M14
MPC	Nfkbid	P1_I6_M7
MPC	Aplp1	P6_I1_M1
MPC	Proser3	P1_I6_M7
MPC	Cox6b1	P1_I6_M16
MPC	Tmem147	P1_I6_M1
MPC	Usf2	P1_I6_M9
MPC	Gm4673	P2_I3_M3
MPC	Fxyd5	P1_I6_M1
MPC	Fxyd1	P1_I6_M2
MPC	Lgi4	P1_I6_M6
MPC	Hpn	P1_I6_M13
MPC	Wtip	P6_I1_M1
MPC	Gpi1	P1_I6_M9
MPC	Gm12758	P1_I6_M6
MPC	Cebpa	P1_I6_M12
MPC	Ccne1	P1_I6_M5
MPC	Gm26526	P1_I6_M6
MPC	Zfp788	P1_I6_M13
MPC	Zfp976	P1_I6_M7
MPC	Zfp975	P1_I6_M3
MPC	Siglecg	P2_I3_M1
MPC	Etfb	P1_I6_M1
MPC	Cd33	P1_I6_M11
MPC	Emc10	P1_I6_M4
MPC	Pold1	P1_I6_M5
MPC	Napsa	P1_I6_M11
MPC	Kcnc3	P1_I6_M14
MPC	Prmt1	P1_I6_M1
MPC	Rcn3	P1_I6_M4
MPC	Flt3l	P1_I6_M3
MPC	Gys1	P6_I1_M1
MPC	Nucb1	P1_I6_M4
MPC	A030001D20Rik	P2_I3_M1
MPC	Grwd1	P1_I6_M8
MPC	Kdelr1	P1_I6_M4
MPC	Tmem143	P1_I6_M14
MPC	Emp3	P1_I6_M1
MPC	Nomo1	P1_I6_M4
MPC	Ldha	P1_I6_M9
MPC	Zdhhc13	P1_I6_M3
MPC	E2f8	P1_I6_M5
MPC	Gas2	P1_I6_M3
MPC	Atp10a	P1_I6_M6
MPC	Ube3a	P2_I3_M4
MPC	Tjp1	P6_I1_M1
MPC	Pcsk6	P1_I6_M2
MPC	Selenos	P1_I6_M4
MPC	Chsy1	P1_I6_M4
MPC	1700112J16Rik	P1_I6_M6
MPC	Lysmd4	P1_I6_M6
MPC	Mef2a	P1_I6_M10
MPC	Igf1r	P2_I3_M2
MPC	Arrdc4	P1_I6_M12
MPC	Chd2	P1_I6_M10
MPC	Akap13	P2_I3_M2
MPC	Mrps11	P1_I6_M8
MPC	Isg20	P6_I1_M1
MPC	Hapln3	P1_I6_M6
MPC	Idh2	P1_I6_M17
MPC	Prc1	P1_I6_M5
MPC	Wdr73	P1_I6_M13
MPC	Sec11a	P1_I6_M17
MPC	Sh3gl3	P1_I6_M6
MPC	Saxo2	P1_I6_M6
MPC	Gm16638	P1_I6_M3
MPC	Mesd	P1_I6_M17
MPC	Cemip	P1_I6_M2
MPC	Prss23	P5_I3_M1
MPC	Me3	P1_I6_M7
MPC	Picalm	P2_I3_M2
MPC	Crebzf	P1_I6_M7
MPC	Tmem126a	P1_I6_M16
MPC	Ddias	P1_I6_M7
MPC	Kctd21	P1_I6_M13
MPC	Ndufc2	P1_I6_M16
MPC	Rsf1	P2_I3_M4
MPC	Clns1a	P1_I6_M8
MPC	Myo7a	P2_I3_M1
MPC	Wnt11	P2_I3_M3
MPC	Map6	P1_I6_M7
MPC	Serpinh1	P1_I6_M4
MPC	Arrb1	P6_I1_M1
MPC	Gm10605	P2_I3_M1
MPC	Spcs2	P1_I6_M17
MPC	Ppme1	P1_I6_M9
MPC	Rab6a	P1_I6_M17
MPC	Relt	P2_I3_M1
MPC	Lrrc51	P1_I6_M3
MPC	Il18bp	P1_I6_M14
MPC	Trim12c	P1_I6_M13
MPC	Smpd1	P1_I6_M4
MPC	Timm10b	P1_I6_M1
MPC	Ilk	P1_I6_M16
MPC	Taf10	P1_I6_M1
MPC	Mrpl17	P1_I6_M17
MPC	Tmem9b	P1_I6_M16
MPC	Swap70	P1_I6_M2
MPC	Sbf2	P1_I6_M10
MPC	Adm	P6_I1_M1
MPC	Eif4g2	P1_I6_M15
MPC	Usp47	P2_I3_M4
MPC	Parva	P5_I3_M1
MPC	Insc	P1_I6_M4
MPC	1110004F10Rik	P1_I6_M1
MPC	Nucb2	P1_I6_M4
MPC	Smg1	P1_I6_M10
MPC	Gde1	P1_I6_M17
MPC	Rexo5	P1_I6_M13
MPC	Mettl9	P1_I6_M17
MPC	Igsf6	P1_I6_M11
MPC	Ndufab1	P1_I6_M1
MPC	Tnrc6a	P2_I3_M2
MPC	Nupr1	P1_I6_M2
MPC	2510046G10Rik	P1_I6_M3
MPC	Bola2	P1_I6_M8
MPC	Coro1a	P1_I6_M11
MPC	Aldoa	P1_I6_M9
MPC	2023-09-01	P1_I6_M7
MPC	Dctpp1	P1_I6_M8
MPC	Zfp747	P1_I6_M14
MPC	Zfp764	P1_I6_M3
MPC	Gm45184	P2_I3_M1
MPC	Zfp689	P1_I6_M13
MPC	Ccdc189	P1_I6_M14
MPC	Ctf1	P1_I6_M3
MPC	Vkorc1	P1_I6_M4
MPC	Fus	P1_I6_M10
MPC	Itgam	P1_I6_M11
MPC	9130023H24Rik	P1_I6_M3
MPC	Tgfb1i1	P5_I3_M1
MPC	Fgfr2	P1_I6_M15
MPC	Bub3	P1_I6_M16
MPC	Cpxm2	P1_I6_M18
MPC	Adam12	P1_I6_M4
MPC	Mki67	P1_I6_M5
MPC	Ebf3	P1_I6_M12
MPC	Glrx3	P1_I6_M1
MPC	Bnip3	P1_I6_M9
MPC	Adam8	P4_I1_M1
MPC	Psmd13	P1_I6_M1
MPC	Ifitm5	P1_I6_M2
MPC	Ifitm2	P1_I6_M16
MPC	Ifitm3	P5_I3_M1
MPC	Ifitm6	P1_I6_M11
MPC	Rnh1	P1_I6_M1
MPC	Hras	P1_I6_M17
MPC	Rassf7	P1_I6_M14
MPC	Taldo1	P1_I6_M1
MPC	Polr2l	P3_I2_M1
MPC	Tspan4	P5_I3_M1
MPC	Ctsd	P4_I1_M1
MPC	Mrpl23	P1_I6_M1
MPC	Igf2	P1_I6_M3
MPC	Kcnq1ot1	P2_I3_M2
MPC	Tnfrsf23	P1_I6_M6
MPC	Mrgpre	P2_I3_M3
MPC	Ano1	P1_I6_M2
MPC	Rmnd1	P1_I6_M7
MPC	Syne1	P1_I6_M3
MPC	Ulbp1	P1_I6_M5
MPC	Nup43	P1_I6_M5
MPC	Tab2	P2_I3_M2
MPC	Sash1	P1_I6_M10
MPC	Samd5	P1_I6_M3
MPC	Utrn	P1_I6_M10
MPC	Plagl1	P1_I6_M12
MPC	Phactr2	P1_I6_M12
MPC	Pex3	P1_I6_M7
MPC	Adgrg6	P1_I6_M18
MPC	Abracl	P1_I6_M16
MPC	Gm10827	P1_I6_M6
MPC	Pde7b	P1_I6_M14
MPC	E030030I06Rik	P1_I6_M7
MPC	Slc2a12	P1_I6_M3
MPC	Epb41l2	P1_I6_M2
MPC	Arhgap18	P1_I6_M14
MPC	Zufsp	P1_I6_M6
MPC	Marcks	P1_I6_M12
MPC	Fam229b	P1_I6_M14
MPC	Fyn	P1_I6_M2
MPC	Traf3ip2	P1_I6_M7
MPC	Slc16a10	P1_I6_M3
MPC	Cd164	P1_I6_M17
MPC	Snx3	P1_I6_M1
MPC	Sec63	P2_I3_M2
MPC	Qrsl1	P1_I6_M7
MPC	Rtn4ip1	P1_I6_M14
MPC	Prdm1	P1_I6_M7
MPC	Ascc3	P1_I6_M10
MPC	Lilrb4a	P2_I3_M3
MPC	Serinc1	P2_I3_M2
MPC	Ranbp2	P1_I6_M10
MPC	Sowahc	P1_I6_M3
MPC	P4ha1	P1_I6_M9
MPC	Psap	P4_I1_M1
MPC	Unc5b	P1_I6_M2
MPC	Sgpl1	P4_I1_M1
MPC	Ppa1	P1_I6_M17
MPC	Sar1a	P1_I6_M4
MPC	Col13a1	P1_I6_M2
MPC	Hk1	P1_I6_M9
MPC	Srgn	P1_I6_M11
MPC	Ddx21	P1_I6_M8
MPC	Ddx50	P1_I6_M10
MPC	Sirt1	P1_I6_M7
MPC	Jmjd1c	P1_I6_M10
MPC	Nrbf2	P1_I6_M9
MPC	Rhobtb1	P6_I1_M1
MPC	A930033H14Rik	P2_I3_M1
MPC	Cdk1	P1_I6_M5
MPC	Bicc1	P1_I6_M2
MPC	Cisd1	P1_I6_M16
MPC	Snrpd3	P1_I6_M16
MPC	Mif	P1_I6_M9
MPC	Smarcb1	P1_I6_M1
MPC	Adarb1	P1_I6_M10
MPC	Itgb2	P1_I6_M11
MPC	Pfkl	P1_I6_M9
MPC	Slc1a6	P2_I3_M3
MPC	Cdc34	P1_I6_M16
MPC	Gzmm	P1_I6_M7
MPC	Bsg	P1_I6_M9
MPC	Plppr3	P2_I3_M1
MPC	Prtn3	P1_I6_M3
MPC	Arid3a	P1_I6_M13
MPC	Cnn2	P5_I3_M1
MPC	Arhgap45	P1_I6_M3
MPC	Polr2e	P1_I6_M1
MPC	Gpx4	P1_I6_M1
MPC	Sbno2	P1_I6_M10
MPC	Atp5d	P1_I6_M1
MPC	Ndufs7	P1_I6_M1
MPC	Mbd3	P1_I6_M1
MPC	Uqcr11	P1_I6_M16
MPC	Abhd17a	P1_I6_M1
MPC	Lsm7	P1_I6_M16
MPC	Timm13	P1_I6_M16
MPC	Gadd45b	P1_I6_M6
MPC	Map2k2	P1_I6_M4
MPC	Eef2	P1_I6_M9
MPC	Mrpl54	P1_I6_M1
MPC	Smim24	P1_I6_M14
MPC	Aes	P1_I6_M1
MPC	Zfp873	P2_I3_M3
MPC	AU041133	P1_I6_M6
MPC	Glt8d2	P1_I6_M3
MPC	Chst11	P1_I6_M4
MPC	Aldh1l2	P1_I6_M2
MPC	Appl2	P1_I6_M9
MPC	Ckap4	P1_I6_M4
MPC	Tmem263	P1_I6_M4
MPC	Fbxo7	P1_I6_M7
MPC	Timp3	P5_I3_M1
MPC	Hsp90b1	P1_I6_M9
MPC	Igf1	P4_I1_M1
MPC	Parpbp	P1_I6_M5
MPC	Nup37	P1_I6_M5
MPC	Arl1	P1_I6_M17
MPC	Gas2l3	P4_I1_M1
MPC	Ikbip	P1_I6_M4
MPC	Tmpo	P1_I6_M5
MPC	Snrpf	P1_I6_M16
MPC	Ndufa12	P1_I6_M16
MPC	Mrpl42	P1_I6_M1
MPC	Ube2n	P1_I6_M8
MPC	Nudt4	P1_I6_M12
MPC	Atp2b1	P2_I3_M2
MPC	Kitl	P1_I6_M12
MPC	Ppfia2	P1_I6_M2
MPC	Ppp1r12a	P2_I3_M4
MPC	Csrp2	P1_I6_M1
MPC	Nap1l1	P1_I6_M8
MPC	Lyz2	P4_I1_M1
MPC	Mdm2	P1_I6_M15
MPC	Mdm1	P1_I6_M6
MPC	Dyrk2	P2_I3_M2
MPC	Tmbim4	P1_I6_M17
MPC	Hmga2	P1_I6_M8
MPC	Wif1	P1_I6_M2
MPC	Xpot	P1_I6_M4
MPC	Ppm1h	P1_I6_M7
MPC	Mon2	P1_I6_M2
MPC	Cdk4	P1_I6_M1
MPC	Tspan31	P1_I6_M17
MPC	Dctn2	P1_I6_M8
MPC	Ndufa4l2	P1_I6_M9
MPC	Lrp1	P1_I6_M9
MPC	Prim1	P1_I6_M5
MPC	Naca	P1_I6_M8
MPC	Ptges3	P1_I6_M8
MPC	Atp5b	P1_I6_M1
MPC	Timeless	P1_I6_M5
MPC	Cnpy2	P1_I6_M4
MPC	Ankrd52	P1_I6_M3
MPC	Myl6b	P1_I6_M13
MPC	A430046D13Rik	P2_I3_M1
MPC	Rpl41	P3_I2_M1
MPC	Pa2g4	P1_I6_M8
MPC	Sarnp	P1_I6_M1
MPC	Rdh5	P2_I3_M1
MPC	Pnpla6	P1_I6_M7
MPC	Pet100	P1_I6_M16
MPC	Mcemp1	P1_I6_M11
MPC	Shcbp1	P1_I6_M5
MPC	Lig4	P2_I3_M3
MPC	Mcf2l	P1_I6_M7
MPC	Dcun1d2	P2_I3_M1
MPC	Gas6	P1_I6_M12
MPC	Gm5608	P1_I6_M13
MPC	Cdc16	P1_I6_M17
MPC	Tdrp	P2_I3_M1
MPC	Agpat5	P1_I6_M17
MPC	Vdac3	P1_I6_M1
MPC	Sfrp1	P1_I6_M7
MPC	Letm2	P1_I6_M6
MPC	D830025C05Rik	P1_I6_M10
MPC	Nsd3	P1_I6_M10
MPC	Plpp5	P1_I6_M4
MPC	Gm17484	P1_I6_M3
MPC	Fnta	P1_I6_M1
MPC	Rab11fip1	P1_I6_M3
MPC	Eif4ebp1	P1_I6_M9
MPC	Rnf122	P1_I6_M10
MPC	Mak16	P1_I6_M8
MPC	Prag1	P1_I6_M7
MPC	Dlc1	P1_I6_M15
MPC	Tusc3	P1_I6_M17
MPC	Msr1	P4_I1_M1
MPC	Cnot7	P1_I6_M2
MPC	Pdgfrl	P1_I6_M4
MPC	Pcm1	P2_I3_M4
MPC	1700029J07Rik	P1_I6_M6
MPC	Ankrd37	P6_I1_M1
MPC	Lrp2bp	P2_I3_M3
MPC	Slc25a4	P1_I6_M1
MPC	Stox2	P1_I6_M2
MPC	Neil3	P1_I6_M3
MPC	Vegfc	P1_I6_M12
MPC	Hpgd	P1_I6_M2
MPC	Hmgb2	P1_I6_M5
MPC	Hpf1	P1_I6_M8
MPC	Cpe	P1_I6_M4
MPC	Lpl	P1_I6_M12
MPC	Zfp930	P1_I6_M18
MPC	Zfp964	P1_I6_M18
MPC	Zfp866	P1_I6_M13
MPC	Gmip	P1_I6_M3
MPC	Ndufa13	P1_I6_M1
MPC	Cope	P1_I6_M4
MPC	Crlf1	P5_I3_M1
MPC	Uba52	P3_I2_M1
MPC	Ssbp4	P1_I6_M1
MPC	Lsm4	P1_I6_M16
MPC	Jund	P1_I6_M10
MPC	Mpv17l2	P1_I6_M1
MPC	Ccdc124	P1_I6_M16
MPC	Use1	P1_I6_M4
MPC	C430049E01Rik	P1_I6_M2
MPC	Bst2	P1_I6_M16
MPC	Pgls	P1_I6_M1
MPC	Colgalt1	P1_I6_M17
MPC	Zfp709	P1_I6_M3
MPC	Tpm4	P1_I6_M8
MPC	Fam32a	P1_I6_M1
MPC	Gm17435	P1_I6_M7
MPC	Smim7	P1_I6_M1
MPC	Mcm5	P1_I6_M5
MPC	Lsm6	P1_I6_M1
MPC	Mmaa	P1_I6_M6
MPC	Abce1	P2_I3_M2
MPC	Smarca5	P2_I3_M4
MPC	Il15	P1_I6_M13
MPC	Tbc1d9	P1_I6_M6
MPC	Scoc	P1_I6_M1
MPC	Ndufb7	P1_I6_M16
MPC	Tecr	P1_I6_M4
MPC	Ddx39	P1_I6_M1
MPC	Asf1b	P1_I6_M5
MPC	Zswim4	P1_I6_M3
MPC	Gadd45gip1	P1_I6_M1
MPC	Rad23a	P1_I6_M8
MPC	Calr	P1_I6_M9
MPC	Prdx2	P1_I6_M1
MPC	Junb	P1_I6_M10
MPC	Trir	P1_I6_M1
MPC	Wdr83os	P1_I6_M1
MPC	4921524J17Rik	P1_I6_M1
MPC	Neto2	P1_I6_M3
MPC	Adcy7	P1_I6_M14
MPC	Nkd1	P2_I3_M3
MPC	Chd9	P1_I6_M10
MPC	Rbl2	P1_I6_M10
MPC	Irx3	P2_I3_M4
MPC	Nudt21	P1_I6_M1
MPC	Mt1	P6_I1_M1
MPC	Herpud1	P1_I6_M4
MPC	Polr2c	P1_I6_M1
MPC	Dok4	P1_I6_M3
MPC	Cdh11	P1_I6_M12
MPC	Dync1li2	P2_I3_M4
MPC	K230015D01Rik	P2_I3_M1
MPC	Gm3830	P1_I6_M6
MPC	D230025D16Rik	P1_I6_M6
MPC	Fbxl8	P1_I6_M18
MPC	4931428F04Rik	P6_I1_M1
MPC	Slc12a4	P1_I6_M2
MPC	Smpd3	P1_I6_M4
MPC	Zfp90	P1_I6_M3
MPC	Nfat5	P1_I6_M10
MPC	Psmd7	P1_I6_M8
MPC	Zfhx3	P2_I3_M2
MPC	Txnl4b	P1_I6_M14
MPC	Cmtr2	P1_I6_M13
MPC	Glg1	P1_I6_M2
MPC	Adat1	P1_I6_M13
MPC	Nudt7	P1_I6_M3
MPC	Maf	P1_I6_M15
MPC	Cdyl2	P1_I6_M3
MPC	Gcsh	P1_I6_M1
MPC	Plcg2	P2_I3_M3
MPC	Hsbp1	P1_I6_M1
MPC	Tldc1	P2_I3_M1
MPC	Gins2	P1_I6_M5
MPC	Emc8	P1_I6_M8
MPC	Aprt	P1_I6_M8
MPC	Trappc2l	P1_I6_M1
MPC	Acsf3	P1_I6_M7
MPC	Ankrd11	P2_I3_M4
MPC	Sult5a1	P2_I3_M1
MPC	Spata2l	P1_I6_M13
MPC	Tcf25	P1_I6_M9
MPC	Ccsap	P1_I6_M3
MPC	2310022B05Rik	P6_I1_M1
MPC	Egln1	P1_I6_M9
MPC	Kcnk1	P1_I6_M2
MPC	Gm26759	P1_I6_M3
MPC	Irf2bp2	P1_I6_M15
MPC	Tomm20	P1_I6_M1
MPC	Nrp1	P1_I6_M12
MPC	Itgb1	P1_I6_M9
MPC	Thoc7	P1_I6_M16
MPC	Psmd6	P1_I6_M1
MPC	Rpl15	P1_I6_M1
MPC	Rtraf	P1_I6_M17
MPC	Gng2	P4_I1_M1
MPC	Mrps16	P1_I6_M16
MPC	Usp54	P1_I6_M13
MPC	2810402E24Rik	P1_I6_M3
MPC	6230400D17Rik	P1_I6_M6
MPC	Chchd1	P1_I6_M1
MPC	Vcl	P5_I3_M1
MPC	Ap3m1	P1_I6_M17
MPC	Zmiz1	P1_I6_M10
MPC	Ppif	P1_I6_M7
MPC	Il17rd	P1_I6_M6
MPC	Arhgef3	P1_I6_M18
MPC	Dcp1a	P1_I6_M7
MPC	Spcs1	P1_I6_M17
MPC	Glt8d1	P1_I6_M4
MPC	Pbrm1	P2_I3_M4
MPC	Timm23	P1_I6_M3
MPC	Ercc6	P2_I3_M1
MPC	Arhgap22	P1_I6_M14
MPC	Fam35a	P1_I6_M3
MPC	Wapl	P2_I3_M4
MPC	Ccser2	P2_I3_M4
MPC	Ghitm	P1_I6_M9
MPC	Gm7324	P1_I6_M6
MPC	Ear2	P1_I6_M7
MPC	AC160336.1	P1_I6_M6
MPC	Ero1l	P6_I1_M1
MPC	Gnpnat1	P1_I6_M17
MPC	Gm15222	P2_I3_M1
MPC	Cnih1	P1_I6_M17
MPC	Gm48933	P1_I6_M14
MPC	Samd4	P1_I6_M2
MPC	2810457G06Rik	P2_I3_M1
MPC	Gch1	P1_I6_M3
MPC	Apex1	P1_I6_M1
MPC	Ang	P2_I3_M3
MPC	Ndrg2	P6_I1_M1
MPC	Hnrnpc	P2_I3_M4
MPC	Chd8	P2_I3_M4
MPC	Tox4	P1_I6_M15
MPC	Dad1	P1_I6_M17
MPC	Mrpl52	P1_I6_M1
MPC	Mmp14	P1_I6_M15
MPC	4931414P19Rik	P1_I6_M3
MPC	Psmb5	P1_I6_M16
MPC	Acin1	P2_I3_M4
MPC	Zfhx2	P1_I6_M13
MPC	Pck2	P1_I6_M2
MPC	Psme2	P1_I6_M1
MPC	Tm9sf1	P1_I6_M13
MPC	Rabggta	P1_I6_M6
MPC	Dhrs1	P1_I6_M4
MPC	Ltb4r1	P1_I6_M11
MPC	Gzmd	P1_I6_M5
MPC	Cenpj	P2_I3_M1
MPC	Gm16973	P1_I6_M6
MPC	Sap18	P1_I6_M16
MPC	Ska3	P1_I6_M6
MPC	Mrpl57	P1_I6_M1
MPC	Arl11	P1_I6_M3
MPC	Trim13	P1_I6_M7
MPC	Gm27010	P2_I3_M3
MPC	Ctsb	P4_I1_M1
MPC	Fam167a	P2_I3_M3
MPC	Msra	P1_I6_M7
MPC	Ints9	P1_I6_M14
MPC	Zfp395	P6_I1_M1
MPC	Pbk	P1_I6_M5
MPC	Esco2	P1_I6_M5
MPC	Adra1a	P2_I3_M1
MPC	Dpysl2	P1_I6_M4
MPC	Bnip3l	P1_I6_M9
MPC	Loxl2	P1_I6_M9
MPC	Rhobtb2	P1_I6_M3
MPC	Sorbs3	P1_I6_M14
MPC	Slc39a14	P1_I6_M2
MPC	Bmp1	P1_I6_M2
MPC	Lpar6	P1_I6_M3
MPC	Itm2b	P1_I6_M2
MPC	Sucla2	P1_I6_M1
MPC	Esd	P1_I6_M8
MPC	Gm4285	P1_I6_M6
MPC	Rgcc	P6_I1_M1
MPC	Pcdh20	P1_I6_M7
MPC	Dach1	P1_I6_M3
MPC	Klf12	P1_I6_M2
MPC	Kctd12	P1_I6_M12
MPC	Acod1	P1_I6_M11
MPC	Ednrb	P1_I6_M7
MPC	Gm10076	P3_I2_M1
MPC	Gpr180	P1_I6_M17
MPC	Dnajc3	P1_I6_M17
MPC	Mbnl2	P1_I6_M10
MPC	Ipo5	P5_I3_M1
MPC	Gm26870	P1_I6_M3
MPC	Aasdhppt	P1_I6_M1
MPC	Kbtbd3	P1_I6_M3
MPC	Casp1	P1_I6_M14
MPC	Pdgfd	P1_I6_M2
MPC	Dcun1d5	P1_I6_M1
MPC	Mmp8	P1_I6_M11
MPC	Pgr	P1_I6_M18
MPC	Fut4	P1_I6_M6
MPC	Taf1d	P1_I6_M6
MPC	Smco4	P1_I6_M1
MPC	Naalad2	P2_I3_M3
MPC	Pin1	P1_I6_M1
MPC	Olfm2	P1_I6_M18
MPC	A230050P20Rik	P1_I6_M3
MPC	Eif3g	P1_I6_M1
MPC	Dnmt1	P1_I6_M5
MPC	Mrpl4	P1_I6_M1
MPC	Icam1	P2_I3_M1
MPC	Gm16754	P1_I6_M13
MPC	Slc44a2	P6_I1_M1
MPC	Tmed1	P1_I6_M17
MPC	Carm1	P1_I6_M16
MPC	Spc24	P1_I6_M5
MPC	Prkcsh	P1_I6_M4
MPC	Gm16845	P2_I3_M3
MPC	Zfp810	P1_I6_M3
MPC	Anln	P1_I6_M5
MPC	Eepd1	P1_I6_M12
MPC	Thyn1	P1_I6_M16
MPC	Prdm10	P1_I6_M18
MPC	Srpr	P1_I6_M4
MPC	Rpusd4	P1_I6_M7
MPC	Hyls1	P1_I6_M3
MPC	Stt3a	P1_I6_M4
MPC	Tbrg1	P1_I6_M17
MPC	Panx3	P1_I6_M4
MPC	Ubash3b	P1_I6_M13
MPC	Arhgef12	P2_I3_M2
MPC	Nectin1	P1_I6_M7
MPC	H2afx	P1_I6_M5
MPC	Hmbs	P1_I6_M1
MPC	Trappc4	P1_I6_M1
MPC	C030014I23Rik	P1_I6_M3
MPC	Ddx6	P1_I6_M15
MPC	Arcn1	P1_I6_M10
MPC	Atp5l	P1_I6_M16
MPC	Mpzl3	P1_I6_M13
MPC	Jaml	P2_I3_M1
MPC	Il10ra	P1_I6_M13
MPC	Fxyd2	P1_I6_M14
MPC	Tagln	P5_I3_M1
MPC	Gm48529	P1_I6_M6
MPC	Cadm1	P1_I6_M2
MPC	Rexo2	P1_I6_M16
MPC	Hspb2	P1_I6_M2
MPC	4930550C14Rik	P2_I3_M1
MPC	Dmxl2	P2_I3_M3
MPC	Idh3a	P1_I6_M16
MPC	Hykk	P1_I6_M3
MPC	Psma4	P1_I6_M1
MPC	Tspan3	P1_I6_M17
MPC	Lingo1	P2_I3_M3
MPC	Cspg4	P1_I6_M2
MPC	Neil1	P1_I6_M7
MPC	Commd4	P1_I6_M1
MPC	Ulk3	P1_I6_M18
MPC	Csk	P1_I6_M8
MPC	Nptn	P2_I3_M2
MPC	Neo1	P1_I6_M4
MPC	Arih1	P2_I3_M2
MPC	Pkm	P1_I6_M9
MPC	Uaca	P1_I6_M2
MPC	Kif23	P1_I6_M5
MPC	Coro2b	P2_I3_M3
MPC	Gm26609	P2_I3_M1
MPC	Gm36033	P1_I6_M14
MPC	Tipin	P1_I6_M8
MPC	Rab11a	P1_I6_M1
MPC	Parp16	P2_I3_M1
MPC	Rasl12	P1_I6_M18
MPC	Pclaf	P1_I6_M5
MPC	Fam96a	P1_I6_M16
MPC	Car12	P1_I6_M2
MPC	Rps27l	P1_I6_M1
MPC	Tpm1	P1_I6_M12
MPC	Rora	P1_I6_M9
MPC	Anxa2	P1_I6_M1
MPC	Rnf111	P1_I6_M6
MPC	Lipc	P1_I6_M2
MPC	Aldh1a2	P1_I6_M3
MPC	Polr2m	P1_I6_M8
MPC	Cgnl1	P1_I6_M3
MPC	Tcf12	P2_I3_M4
MPC	Mns1	P2_I3_M1
MPC	Nedd4	P1_I6_M15
MPC	Pigb	P1_I6_M6
MPC	Fam214a	P1_I6_M2
MPC	Arpp19	P1_I6_M1
MPC	Mapk6	P1_I6_M4
MPC	Tmod3	P2_I3_M2
MPC	Tmod2	P2_I3_M3
MPC	Gm26903	P1_I6_M14
MPC	Mb21d1	P1_I6_M13
MPC	Eef1a1	P1_I6_M4
MPC	Cd109	P1_I6_M2
MPC	Col12a1	P6_I1_M1
MPC	Cox7a2	P1_I6_M16
MPC	Senp6	P2_I3_M2
MPC	Phip	P1_I6_M15
MPC	Lca5	P1_I6_M18
MPC	Elovl4	P1_I6_M14
MPC	Fam46a	P1_I6_M2
MPC	Tpbg	P1_I6_M1
MPC	Me1	P1_I6_M4
MPC	Prss35	P1_I6_M4
MPC	Cep162	P1_I6_M3
MPC	Tmed3	P1_I6_M4
MPC	Ctsh	P1_I6_M2
MPC	Gm26882	P1_I6_M13
MPC	Plod2	P1_I6_M2
MPC	U2surp	P1_I6_M15
MPC	Paqr9	P1_I6_M18
MPC	Trpc1	P1_I6_M13
MPC	Gk5	P2_I3_M1
MPC	Slc25a36	P1_I6_M10
MPC	Rbp1	P1_I6_M12
MPC	Copb2	P1_I6_M4
MPC	Amotl2	P1_I6_M15
MPC	Srprb	P1_I6_M4
MPC	Topbp1	P1_I6_M5
MPC	Cdv3	P2_I3_M4
MPC	Uba5	P1_I6_M17
MPC	Mrpl3	P1_I6_M1
MPC	Aste1	P2_I3_M1
MPC	Alas1	P1_I6_M3
MPC	Pcbp4	P1_I6_M8
MPC	Rrp9	P1_I6_M8
MPC	Tex264	P1_I6_M17
MPC	Manf	P1_I6_M17
MPC	Hyal1	P1_I6_M7
MPC	Sema3b	P1_I6_M2
MPC	Traip	P1_I6_M5
MPC	Uba7	P1_I6_M7
MPC	Rnf123	P1_I6_M18
MPC	Dag1	P1_I6_M9
MPC	Lamb2	P1_I6_M4
MPC	Impdh2	P1_I6_M8
MPC	Dalrd3	P1_I6_M18
MPC	P4htm	P1_I6_M6
MPC	Slc26a6	P2_I3_M3
MPC	Uqcrc1	P1_I6_M1
MPC	Col7a1	P1_I6_M6
MPC	Shisa5	P5_I3_M1
MPC	Ccdc51	P1_I6_M7
MPC	Camp	P1_I6_M11
MPC	Cspg5	P1_I6_M7
MPC	Ngp	P1_I6_M11
MPC	Setd2	P1_I6_M10
MPC	Nradd	P1_I6_M1
MPC	Ccdc12	P1_I6_M1
MPC	Pth1r	P1_I6_M2
MPC	Als2cl	P1_I6_M10
MPC	Ltf	P1_I6_M11
MPC	Lrrfip2	P1_I6_M2
MPC	Crtap	P1_I6_M4
MPC	Cmtm7	P1_I6_M16
MPC	Rbms3	P1_I6_M12
MPC	Plcd1	P1_I6_M2
MPC	Ttc21a	P1_I6_M6
MPC	1700019L13Rik	P1_I6_M13
MPC	Entpd3	P1_I6_M2
MPC	Vipr1	P1_I6_M6
MPC	Nktr	P1_I6_M10
MPC	E530011L22Rik	P1_I6_M6
MPC	Higd1a	P1_I6_M9
MPC	1700048O20Rik	P2_I3_M3
MPC	Fam198a	P1_I6_M7
MPC	Tcaim	P1_I6_M3
MPC	Kif15	P1_I6_M5
MPC	Gm9856	P1_I6_M13
MPC	Tmem158	P1_I6_M6
MPC	Lars2	P1_I6_M10
MPC	2010315B03Rik	P2_I3_M3
MPC	Selenom	P1_I6_M17
MPC	Pes1	P1_I6_M8
MPC	Uqcr10	P1_I6_M1
MPC	Emid1	P2_I3_M1
MPC	Znrf3	P1_I6_M7
MPC	Xbp1	P1_I6_M9
MPC	Mrps24	P1_I6_M1
MPC	Ppia	P1_I6_M16
MPC	Myo1g	P1_I6_M3
MPC	Igfbp3	P1_I6_M12
MPC	Tns3	P1_I6_M12
MPC	Upp1	P1_I6_M11
MPC	Fignl1	P1_I6_M5
MPC	Grb10	P1_I6_M9
MPC	Sec61g	P1_I6_M17
MPC	Egfr	P1_I6_M7
MPC	Pno1	P1_I6_M8
MPC	C1d	P1_I6_M1
MPC	Meis1	P1_I6_M7
MPC	Mdh1	P1_I6_M4
MPC	Tmem17	P1_I6_M18
MPC	B3gnt2	P1_I6_M3
MPC	Commd1	P1_I6_M1
MPC	Cct4	P1_I6_M16
MPC	Fam161a	P2_I3_M3
MPC	Xpo1	P1_I6_M8
MPC	Usp34	P1_I6_M15
MPC	Sptbn1	P2_I3_M4
MPC	Psme4	P1_I6_M2
MPC	Erlec1	P1_I6_M4
MPC	Stc2	P6_I1_M1
MPC	Nprl3	P1_I6_M3
MPC	Npm1	P1_I6_M8
MPC	Lcp2	P1_I6_M3
MPC	Spdl1	P1_I6_M5
MPC	Wwc1	P1_I6_M6
MPC	Ccng1	P2_I3_M2
MPC	Ebf1	P1_I6_M12
MPC	Trim7	P1_I6_M7
MPC	Gm12185	P1_I6_M7
MPC	Psme2b	P2_I3_M3
MPC	Ifi47	P1_I6_M7
MPC	Gfpt2	P1_I6_M6
MPC	Sqstm1	P2_I3_M2
MPC	Canx	P1_I6_M4
MPC	Hnrnph1	P1_I6_M10
MPC	Clk4	P1_I6_M10
MPC	Hnrnpab	P1_I6_M8
MPC	Nhp2	P1_I6_M8
MPC	Cdkl3	P1_I6_M14
MPC	Vdac1	P1_I6_M17
MPC	Aff4	P2_I3_M2
MPC	Uqcrq	P1_I6_M16
MPC	Gdf9	P1_I6_M6
MPC	Shroom1	P1_I6_M13
MPC	Irf1	P1_I6_M7
MPC	Slc22a4	P1_I6_M3
MPC	P4ha2	P1_I6_M9
MPC	Fnip1	P2_I3_M2
MPC	Hint1	P1_I6_M1
MPC	Slc36a2	P1_I6_M2
MPC	Sparc	P1_I6_M2
MPC	G3bp1	P1_I6_M1
MPC	Fam114a2	P1_I6_M9
MPC	Igtp	P1_I6_M7
MPC	Irgm2	P1_I6_M7
MPC	Zfp39	P2_I3_M3
MPC	Iba57	P1_I6_M3
MPC	Guk1	P1_I6_M16
MPC	Mrpl55	P1_I6_M1
MPC	Wnt9a	P1_I6_M13
MPC	Zfp867	P2_I3_M1
MPC	Drg2	P1_I6_M7
MPC	Alkbh5	P1_I6_M9
MPC	Top3a	P1_I6_M13
MPC	Smcr8	P1_I6_M3
MPC	Zfp286	P2_I3_M1
MPC	Elac2	P1_I6_M7
MPC	Map2k4	P2_I3_M2
MPC	Zkscan6	P1_I6_M14
MPC	Adprm	P1_I6_M7
MPC	Ndel1	P2_I3_M2
MPC	Aurkb	P1_I6_M5
MPC	9330160F10Rik	P1_I6_M14
MPC	Cyb5d1	P2_I3_M1
MPC	Naa38	P1_I6_M16
MPC	Kdm6b	P1_I6_M9
MPC	Kdm6bos	P2_I3_M1
MPC	Trp53	P1_I6_M8
MPC	Cd68	P4_I1_M1
MPC	Nlgn2	P1_I6_M7
MPC	Eif5a	P1_I6_M8
MPC	Dlg4	P2_I3_M2
MPC	Psmb6	P1_I6_M1
MPC	Pfn1	P1_I6_M1
MPC	C1qbp	P1_I6_M8
MPC	Pimreg	P1_I6_M5
MPC	Slc13a5	P1_I6_M2
MPC	Mybbp1a	P1_I6_M8
MPC	Spns2	P1_I6_M4
[truncated: 49,134 more rows]
