# Supplementary material for: Cell type-specific network analysis in Diversity Outbred mice identifies genes potentially responsible for human bone mineral density GWAS associations
Source: bioRxiv preprint, doi:10.1101/2024.05.20.594981, version 4 (2026-02-08)
Supplement: Supplementary_File_2 [file 594981_file03.xlsx]

## Sheet: Supplementary File 2a
Trajectory	Cell Type (pseudotime) Boundary	Pseudotime point (Start)	Pseudotime point (End)	Percentage of cell type covered between pseudotime boundary	Number of tradeSeq genes (global, Padj < 0.05)	Number of tradeSeq genes (trajectory-specific, Padj < 0.05)	Cell type (examined for eQTL analysis)	Number of eGenes that are tradeSeq genes (global and/or trajectory-specific)	Name of eGene
1,2,3	MPC_to_LMP	0	20	0.562525	2646	1353	MPC	2	Rpl29, Rps3a1
1	LMP_to_OBP	20	42	0.84283	1337	473	LMP	12	Grb14, Cyb5a, F2r, Gstm2, Guca1a, Maob, Pkm, Rgs17, Rgs7bp, St6galnac2, Tns1, Trim12c
3	LMP_to_MALP	20	36	0.803482	1117	651	LMP	11	Clic4, Col2a1, Cyb5a, F2r, Grb14, Maob, Tns1, Gstm2, Man2a2, Rgs17, Trim12c
1	OBP_to_OB1	42	53	0.67043	1856	1235	OBP	25	2310043M15Rik, Ces1g, Dcaf4, Dpep1, H2-D1, Hapln4, Lgals9, Nrbp2, Prss50, Psrc1, Rhbdl2, Sec61b, Tmem56, Tspan13, Ckap4, Cmas, Gapdh, H2-T22, Htr1b, Pigt, Pkm, Rps2, S100a1, Srp9, Ugdh
1	OB1_to_Ocy	53	62	0.672926	1119	494	OB1	6	Prnp, Cyb5a, Gapdh, H2-Q6, H2-Q7, Tsc22d1
2	OBP_to_OB2	42	56	0.818874	2470	1515	OBP	34	2310043M15Rik, Dcaf4, Dpep1, H2-D1, H2-Q6, H2-T22, Hapln4, Htr1b, Irak1bp1, Lgals9, Nrbp2, Pigt, Pkm, Prss50, Psrc1, S100a1, Sec61b, Tmem56, 2610318N02Rik, A930033H14Rik, Btbd3, Ces1g, Cyb5a, Gapdh, Hpcal1, Pianp, Rhbdl2, Rpl26, Rps2, Rps3a1, Tbrg1, Tgfb1, Tspan13, Ugdh
2	OB2_to_end	56	85	0.874695	1034	166	OB2	2	Cln5, Gstm2
1	Ocy_to_end	62	85	0.851235	489	87	Ocy	2	Gstm2, Mgll
3	MALP_to_end	36	134	0.963075	1217	1697	MALP	21	Alad, Ephx2, Fbln5, Gas1, Gdpd3, Hebp2, Isoc2a, Kcns3, Mxra7, Olfml3, Ppic, Rarres1, Retsat, Rpl21, Rpl26, Rpl29, Rps14, Rps3a1, Rps9, St6galnac2, Ucp2
Total	-	-	-		13285	7671	-	115	73 (distinct)

## Sheet: Supplementary File 2b
cell_type	cell_type_boundary	Gene	DO_eQTL_eGene	Pvalue_trajectory1	Pvalue_adj_trajectory1	waldStat_trajectory1	logFC_trajectory1	chr	pos	lod	ci_lo	ci_hi	Strand	Start	End	dist_start
LMP	LMP_to_OBP	Grb14	TRUE	3.58e-06	0.000465512	21.4763	0.839879	2	65.092	13.1231	64.8161	65.4802	-	64912476	65024987	179488
LMP	LMP_to_OBP	Thbs1	FALSE	0	0	184.94	1.56856	NA	NA	NA	NA	NA	NA	NA	NA	NA
LMP	LMP_to_OBP	Col5a1	FALSE	0	0	177.838	1.15656	NA	NA	NA	NA	NA	NA	NA	NA	NA
LMP	LMP_to_OBP	Lox	FALSE	0	0	154.144	1.04885	NA	NA	NA	NA	NA	NA	NA	NA	NA
LMP	LMP_to_OBP	Ccdc80	FALSE	0	0	122.122	1.133	NA	NA	NA	NA	NA	NA	NA	NA	NA
LMP	LMP_to_OBP	Col12a1	FALSE	0	0	121.649	1.44647	NA	NA	NA	NA	NA	NA	NA	NA	NA
LMP	LMP_to_OBP	Col6a1	FALSE	0	0	111.114	1.13412	NA	NA	NA	NA	NA	NA	NA	NA	NA
LMP	LMP_to_OBP	Col5a2	FALSE	0	0	109.125	0.902295	NA	NA	NA	NA	NA	NA	NA	NA	NA
LMP	LMP_to_OBP	Col1a2	FALSE	0	0	106.293	0.928701	NA	NA	NA	NA	NA	NA	NA	NA	NA
LMP	LMP_to_OBP	Col3a1	FALSE	0	0	101.847	1.48791	NA	NA	NA	NA	NA	NA	NA	NA	NA
LMP	LMP_to_OBP	Sparc	FALSE	0	0	96.9417	0.866116	NA	NA	NA	NA	NA	NA	NA	NA	NA
LMP	LMP_to_OBP	Col1a1	FALSE	0	0	96.2313	0.960252	NA	NA	NA	NA	NA	NA	NA	NA	NA
LMP	LMP_to_OBP	Col8a1	FALSE	0	0	90.8315	1.38309	NA	NA	NA	NA	NA	NA	NA	NA	NA
LMP	LMP_to_OBP	Col6a2	FALSE	0	0	87.7044	1.1016	NA	NA	NA	NA	NA	NA	NA	NA	NA
LMP	LMP_to_OBP	Tnn	FALSE	0	0	82.7371	1.49509	NA	NA	NA	NA	NA	NA	NA	NA	NA
LMP	LMP_to_OBP	Col6a3	FALSE	0	0	80.1543	1.05546	NA	NA	NA	NA	NA	NA	NA	NA	NA
LMP	LMP_to_OBP	Fn1	FALSE	0	0	79.3666	0.954891	NA	NA	NA	NA	NA	NA	NA	NA	NA
LMP	LMP_to_OBP	Bicc1	FALSE	0	0	76.5872	0.915003	NA	NA	NA	NA	NA	NA	NA	NA	NA
LMP	LMP_to_OBP	Pdlim5	FALSE	0	0	76.1429	1.05054	NA	NA	NA	NA	NA	NA	NA	NA	NA
LMP	LMP_to_OBP	Col11a1	FALSE	0	0	75.3493	1.02765	NA	NA	NA	NA	NA	NA	NA	NA	NA
LMP	LMP_to_OBP	Alpl	FALSE	0	0	73.1971	0.858017	NA	NA	NA	NA	NA	NA	NA	NA	NA
LMP	LMP_to_OBP	Ndnf	FALSE	0	0	71.342	1.40555	NA	NA	NA	NA	NA	NA	NA	NA	NA
LMP	LMP_to_OBP	Itgb1	FALSE	0	0	71.2354	0.784845	NA	NA	NA	NA	NA	NA	NA	NA	NA
LMP	LMP_to_OBP	Megf6	FALSE	0	0	70.3329	1.76005	NA	NA	NA	NA	NA	NA	NA	NA	NA
LMP	LMP_to_OBP	Fndc3b	FALSE	1.11e-16	1.01e-13	68.9	0.81669	NA	NA	NA	NA	NA	NA	NA	NA	NA
LMP	LMP_to_OBP	Smc4	FALSE	6.99e-15	6.11e-12	60.603	1.29403	NA	NA	NA	NA	NA	NA	NA	NA	NA
LMP	LMP_to_OBP	Fmod	FALSE	8.55e-15	7.18e-12	60.2117	1.24727	NA	NA	NA	NA	NA	NA	NA	NA	NA
LMP	LMP_to_OBP	Thbs2	FALSE	4.6e-14	3.72e-11	56.896	1.02742	NA	NA	NA	NA	NA	NA	NA	NA	NA
LMP	LMP_to_OBP	Mylk	FALSE	1.02e-13	7.98e-11	55.3216	1.09497	NA	NA	NA	NA	NA	NA	NA	NA	NA
LMP	LMP_to_OBP	P4ha1	FALSE	2.2e-13	1.65e-10	53.8194	0.916201	NA	NA	NA	NA	NA	NA	NA	NA	NA
LMP	LMP_to_OBP	Prelp	FALSE	3.08e-13	2.24e-10	53.1586	1.86265	NA	NA	NA	NA	NA	NA	NA	NA	NA
LMP	LMP_to_OBP	Rnf19a	FALSE	3.76e-13	2.65e-10	52.7649	1.11637	NA	NA	NA	NA	NA	NA	NA	NA	NA
LMP	LMP_to_OBP	Ckap4	FALSE	5.3e-13	3.62e-10	52.0899	0.738502	NA	NA	NA	NA	NA	NA	NA	NA	NA
LMP	LMP_to_OBP	Loxl2	FALSE	5.57e-13	3.69e-10	51.9927	0.975669	NA	NA	NA	NA	NA	NA	NA	NA	NA
LMP	LMP_to_OBP	Postn	FALSE	1.16e-12	7.26e-10	50.5606	1.41613	NA	NA	NA	NA	NA	NA	NA	NA	NA
LMP	LMP_to_OBP	Fzd5	FALSE	1.16e-12	7.26e-10	50.547	1.00357	NA	NA	NA	NA	NA	NA	NA	NA	NA
LMP	LMP_to_OBP	Vcl	FALSE	1.33e-12	8.07e-10	50.2835	0.912256	NA	NA	NA	NA	NA	NA	NA	NA	NA
LMP	LMP_to_OBP	Nid2	FALSE	2.76e-12	1.6e-09	48.8525	1.73135	NA	NA	NA	NA	NA	NA	NA	NA	NA
LMP	LMP_to_OBP	Hsp90b1	FALSE	2.78e-12	1.6e-09	48.8378	0.792034	NA	NA	NA	NA	NA	NA	NA	NA	NA
LMP	LMP_to_OBP	Calu	FALSE	3.51e-12	1.97e-09	48.3784	0.688414	NA	NA	NA	NA	NA	NA	NA	NA	NA
LMP	LMP_to_OBP	Ehd3	FALSE	5e-12	2.73e-09	47.6857	0.977003	NA	NA	NA	NA	NA	NA	NA	NA	NA
LMP	LMP_to_OBP	Tnc	FALSE	5.82e-12	3.1e-09	47.3877	1.0192	NA	NA	NA	NA	NA	NA	NA	NA	NA
LMP	LMP_to_OBP	Rora	FALSE	6.12e-12	3.18e-09	47.2901	0.94411	NA	NA	NA	NA	NA	NA	NA	NA	NA
LMP	LMP_to_OBP	Zfp395	FALSE	6.82e-12	3.46e-09	47.0783	1.26751	NA	NA	NA	NA	NA	NA	NA	NA	NA
LMP	LMP_to_OBP	Tmem45a	FALSE	1.06e-11	5.26e-09	46.2142	0.942014	NA	NA	NA	NA	NA	NA	NA	NA	NA
LMP	LMP_to_OBP	Epb41l2	FALSE	1.26e-11	6.13e-09	45.8692	0.775407	NA	NA	NA	NA	NA	NA	NA	NA	NA
LMP	LMP_to_OBP	Olfml3	FALSE	1.91e-11	9.07e-09	45.0594	0.818013	NA	NA	NA	NA	NA	NA	NA	NA	NA
LMP	LMP_to_OBP	Hmgb2	FALSE	2.7e-11	1.25e-08	44.3822	1.29451	NA	NA	NA	NA	NA	NA	NA	NA	NA
LMP	LMP_to_OBP	Fndc1	FALSE	2.78e-11	1.27e-08	44.3238	2.22905	NA	NA	NA	NA	NA	NA	NA	NA	NA
LMP	LMP_to_OBP	Mef2c	FALSE	3.04e-11	1.35e-08	44.1524	0.757129	NA	NA	NA	NA	NA	NA	NA	NA	NA
LMP	LMP_to_OBP	Dcn	FALSE	4.77e-11	2.08e-08	43.2705	1.77441	NA	NA	NA	NA	NA	NA	NA	NA	NA
LMP	LMP_to_OBP	Cald1	FALSE	6.98e-11	2.99e-08	42.5238	0.674683	NA	NA	NA	NA	NA	NA	NA	NA	NA
LMP	LMP_to_OBP	Pgam1	FALSE	7.55e-11	3.17e-08	42.3713	0.722861	NA	NA	NA	NA	NA	NA	NA	NA	NA
LMP	LMP_to_OBP	Cryab	FALSE	1.06e-10	4.38e-08	41.7014	0.98448	NA	NA	NA	NA	NA	NA	NA	NA	NA
LMP	LMP_to_OBP	Plod2	FALSE	1.13e-10	4.55e-08	41.5758	0.766034	NA	NA	NA	NA	NA	NA	NA	NA	NA
LMP	LMP_to_OBP	Chchd10	FALSE	1.15e-10	4.55e-08	41.5416	-2.42053	NA	NA	NA	NA	NA	NA	NA	NA	NA
LMP	LMP_to_OBP	Pth1r	FALSE	1.17e-10	4.55e-08	41.5207	0.757284	NA	NA	NA	NA	NA	NA	NA	NA	NA
LMP	LMP_to_OBP	Fat1	FALSE	1.19e-10	4.56e-08	41.4824	0.705543	NA	NA	NA	NA	NA	NA	NA	NA	NA
LMP	LMP_to_OBP	Rrm1	FALSE	2.56e-10	9.65e-08	39.9818	1.01112	NA	NA	NA	NA	NA	NA	NA	NA	NA
LMP	LMP_to_OBP	Sh3bgrl	FALSE	3.08e-10	1.14e-07	39.6242	0.703876	NA	NA	NA	NA	NA	NA	NA	NA	NA
LMP	LMP_to_OBP	Serpine1	FALSE	3.87e-10	1.41e-07	39.1796	1.00539	NA	NA	NA	NA	NA	NA	NA	NA	NA
LMP	LMP_to_OBP	Hdlbp	FALSE	3.94e-10	1.41e-07	39.1403	0.681096	NA	NA	NA	NA	NA	NA	NA	NA	NA
LMP	LMP_to_OBP	Lifr	FALSE	5.23e-10	1.84e-07	38.5901	0.827448	NA	NA	NA	NA	NA	NA	NA	NA	NA
LMP	LMP_to_OBP	Asph	FALSE	6e-10	2.08e-07	38.3221	0.878982	NA	NA	NA	NA	NA	NA	NA	NA	NA
LMP	LMP_to_OBP	Pygl	FALSE	6.76e-10	2.31e-07	38.0893	1.3814	NA	NA	NA	NA	NA	NA	NA	NA	NA
LMP	LMP_to_OBP	Lpp	FALSE	7.45e-10	2.5e-07	37.8989	0.752809	NA	NA	NA	NA	NA	NA	NA	NA	NA
LMP	LMP_to_OBP	Sdc3	FALSE	7.96e-10	2.62e-07	37.7699	0.725799	NA	NA	NA	NA	NA	NA	NA	NA	NA
LMP	LMP_to_OBP	Cdkn2d	FALSE	8.15e-10	2.62e-07	37.7237	1.21606	NA	NA	NA	NA	NA	NA	NA	NA	NA
LMP	LMP_to_OBP	Vegfa	FALSE	8.16e-10	2.62e-07	37.7215	0.803151	NA	NA	NA	NA	NA	NA	NA	NA	NA
LMP	LMP_to_OBP	Ptprd	FALSE	9.08e-10	2.87e-07	37.5123	0.80748	NA	NA	NA	NA	NA	NA	NA	NA	NA
LMP	LMP_to_OBP	P4ha2	FALSE	9.26e-10	2.89e-07	37.4747	0.833769	NA	NA	NA	NA	NA	NA	NA	NA	NA
LMP	LMP_to_OBP	Itm2a	FALSE	1.06e-09	3.27e-07	37.2074	1.03971	NA	NA	NA	NA	NA	NA	NA	NA	NA
LMP	LMP_to_OBP	Hmga2	FALSE	1.28e-09	3.87e-07	36.8509	-1.67684	NA	NA	NA	NA	NA	NA	NA	NA	NA
LMP	LMP_to_OBP	Picalm	FALSE	1.58e-09	4.72e-07	36.4358	0.748585	NA	NA	NA	NA	NA	NA	NA	NA	NA
LMP	LMP_to_OBP	Palld	FALSE	1.63e-09	4.8e-07	36.3747	0.80116	NA	NA	NA	NA	NA	NA	NA	NA	NA
LMP	LMP_to_OBP	2900026A02Rik	FALSE	1.8e-09	5.23e-07	36.1838	1.1162	NA	NA	NA	NA	NA	NA	NA	NA	NA
LMP	LMP_to_OBP	Fgfr3	FALSE	2.28e-09	6.55e-07	35.7194	1.21856	NA	NA	NA	NA	NA	NA	NA	NA	NA
LMP	LMP_to_OBP	Omd	FALSE	2.36e-09	6.69e-07	35.6503	1.08076	NA	NA	NA	NA	NA	NA	NA	NA	NA
LMP	LMP_to_OBP	Ube2c	FALSE	2.5e-09	6.99e-07	35.5402	2.08309	NA	NA	NA	NA	NA	NA	NA	NA	NA
LMP	LMP_to_OBP	Igsf10	FALSE	2.57e-09	7.08e-07	35.4874	1.97187	NA	NA	NA	NA	NA	NA	NA	NA	NA
LMP	LMP_to_OBP	Cdk1	FALSE	2.6e-09	7.08e-07	35.4661	1.58145	NA	NA	NA	NA	NA	NA	NA	NA	NA
LMP	LMP_to_OBP	Egln1	FALSE	3.8e-09	1.02e-06	34.7259	0.850989	NA	NA	NA	NA	NA	NA	NA	NA	NA
LMP	LMP_to_OBP	Srpx2	FALSE	3.92e-09	1.04e-06	34.663	0.747822	NA	NA	NA	NA	NA	NA	NA	NA	NA
LMP	LMP_to_OBP	Aoc3	FALSE	4.83e-09	1.27e-06	34.258	1.83807	NA	NA	NA	NA	NA	NA	NA	NA	NA
LMP	LMP_to_OBP	Ibsp	FALSE	4.95e-09	1.29e-06	34.2094	0.781104	NA	NA	NA	NA	NA	NA	NA	NA	NA
LMP	LMP_to_OBP	Efemp2	FALSE	6.77e-09	1.74e-06	33.5999	0.704886	NA	NA	NA	NA	NA	NA	NA	NA	NA
LMP	LMP_to_OBP	Pten	FALSE	8.21e-09	2.08e-06	33.2252	0.752111	NA	NA	NA	NA	NA	NA	NA	NA	NA
LMP	LMP_to_OBP	Itga1	FALSE	1.51e-08	3.79e-06	32.0374	1.20486	NA	NA	NA	NA	NA	NA	NA	NA	NA
LMP	LMP_to_OBP	Prc1	FALSE	1.53e-08	3.8e-06	32.0141	2.12286	NA	NA	NA	NA	NA	NA	NA	NA	NA
LMP	LMP_to_OBP	Fam180a	FALSE	1.59e-08	3.9e-06	31.9414	2.54521	NA	NA	NA	NA	NA	NA	NA	NA	NA
LMP	LMP_to_OBP	Mmp14	FALSE	1.71e-08	4.14e-06	31.8032	0.775547	NA	NA	NA	NA	NA	NA	NA	NA	NA
LMP	LMP_to_OBP	Kif11	FALSE	2.1e-08	5.04e-06	31.3979	2.58693	NA	NA	NA	NA	NA	NA	NA	NA	NA
LMP	LMP_to_OBP	Serping1	FALSE	2.15e-08	5.1e-06	31.3564	0.934866	NA	NA	NA	NA	NA	NA	NA	NA	NA
LMP	LMP_to_OBP	Ndrg1	FALSE	2.2e-08	5.16e-06	31.3112	0.889009	NA	NA	NA	NA	NA	NA	NA	NA	NA
LMP	LMP_to_OBP	Ptpn14	FALSE	2.34e-08	5.43e-06	31.1925	0.85984	NA	NA	NA	NA	NA	NA	NA	NA	NA
LMP	LMP_to_OBP	Clasp2	FALSE	2.68e-08	6.16e-06	30.9266	0.991931	NA	NA	NA	NA	NA	NA	NA	NA	NA
LMP	LMP_to_OBP	Raph1	FALSE	2.78e-08	6.33e-06	30.8543	0.840552	NA	NA	NA	NA	NA	NA	NA	NA	NA
LMP	LMP_to_OBP	Vldlr	FALSE	3.11e-08	6.96e-06	30.6381	0.808317	NA	NA	NA	NA	NA	NA	NA	NA	NA
LMP	LMP_to_OBP	Aspn	FALSE	3.12e-08	6.96e-06	30.63	1.30665	NA	NA	NA	NA	NA	NA	NA	NA	NA
LMP	LMP_to_OBP	Fam114a1	FALSE	3.26e-08	7.18e-06	30.5486	0.771541	NA	NA	NA	NA	NA	NA	NA	NA	NA
LMP	LMP_to_OBP	Fermt2	FALSE	3.49e-08	7.62e-06	30.4145	0.740916	NA	NA	NA	NA	NA	NA	NA	NA	NA
LMP	LMP_to_OBP	Fgfr2	FALSE	3.66e-08	7.91e-06	30.322	0.739057	NA	NA	NA	NA	NA	NA	NA	NA	NA
LMP	LMP_to_OBP	Top2a	FALSE	3.76e-08	8.05e-06	30.2694	1.89163	NA	NA	NA	NA	NA	NA	NA	NA	NA
LMP	LMP_to_OBP	4930523C07Rik	FALSE	4.08e-08	8.65e-06	30.1113	0.911088	NA	NA	NA	NA	NA	NA	NA	NA	NA
LMP	LMP_to_OBP	Mmp23	FALSE	5.12e-08	1.07e-05	29.6712	0.706861	NA	NA	NA	NA	NA	NA	NA	NA	NA
LMP	LMP_to_OBP	Ero1l	FALSE	5.85e-08	1.22e-05	29.4136	0.91921	NA	NA	NA	NA	NA	NA	NA	NA	NA
LMP	LMP_to_OBP	Panx3	FALSE	5.94e-08	1.22e-05	29.3815	0.925551	NA	NA	NA	NA	NA	NA	NA	NA	NA
LMP	LMP_to_OBP	Olfml2b	FALSE	6.47e-08	1.32e-05	29.2178	0.923663	NA	NA	NA	NA	NA	NA	NA	NA	NA
LMP	LMP_to_OBP	Srpx	FALSE	7.99e-08	1.61e-05	28.8097	0.912348	NA	NA	NA	NA	NA	NA	NA	NA	NA
LMP	LMP_to_OBP	Bnip3	FALSE	8.94e-08	1.79e-05	28.5918	0.806478	NA	NA	NA	NA	NA	NA	NA	NA	NA
LMP	LMP_to_OBP	Pgk1	FALSE	9.68e-08	1.92e-05	28.436	0.726228	NA	NA	NA	NA	NA	NA	NA	NA	NA
LMP	LMP_to_OBP	Oxct1	FALSE	1.01e-07	1.99e-05	28.3558	0.713361	NA	NA	NA	NA	NA	NA	NA	NA	NA
LMP	LMP_to_OBP	Plxnb2	FALSE	1.08e-07	2.1e-05	28.2282	0.739204	NA	NA	NA	NA	NA	NA	NA	NA	NA
LMP	LMP_to_OBP	Nrp1	FALSE	1.13e-07	2.17e-05	28.1459	0.925136	NA	NA	NA	NA	NA	NA	NA	NA	NA
LMP	LMP_to_OBP	Ctnnd1	FALSE	1.33e-07	2.54e-05	27.8273	0.751888	NA	NA	NA	NA	NA	NA	NA	NA	NA
LMP	LMP_to_OBP	Apln	FALSE	1.34e-07	2.55e-05	27.8043	1.18702	NA	NA	NA	NA	NA	NA	NA	NA	NA
LMP	LMP_to_OBP	Igdcc4	FALSE	1.4e-07	2.64e-05	27.7215	1.08379	NA	NA	NA	NA	NA	NA	NA	NA	NA
LMP	LMP_to_OBP	Vwa1	FALSE	1.57e-07	2.94e-05	27.4952	1.8752	NA	NA	NA	NA	NA	NA	NA	NA	NA
LMP	LMP_to_OBP	Mmp2	FALSE	1.88e-07	3.49e-05	27.1478	0.690435	NA	NA	NA	NA	NA	NA	NA	NA	NA
LMP	LMP_to_OBP	Rnf144a	FALSE	1.92e-07	3.53e-05	27.1075	1.09157	NA	NA	NA	NA	NA	NA	NA	NA	NA
LMP	LMP_to_OBP	Grip2	FALSE	2.2e-07	4.01e-05	26.8473	5.70784	NA	NA	NA	NA	NA	NA	NA	NA	NA
LMP	LMP_to_OBP	Arhgap29	FALSE	2.47e-07	4.45e-05	26.6261	1.14959	NA	NA	NA	NA	NA	NA	NA	NA	NA
LMP	LMP_to_OBP	Myh9	FALSE	2.59e-07	4.63e-05	26.537	0.733574	NA	NA	NA	NA	NA	NA	NA	NA	NA
LMP	LMP_to_OBP	Me1	FALSE	2.76e-07	4.89e-05	26.413	0.762215	NA	NA	NA	NA	NA	NA	NA	NA	NA
LMP	LMP_to_OBP	Emilin1	FALSE	3.09e-07	5.45e-05	26.1902	0.87092	NA	NA	NA	NA	NA	NA	NA	NA	NA
LMP	LMP_to_OBP	Cenpf	FALSE	3.52e-07	6.15e-05	25.9403	2.45545	NA	NA	NA	NA	NA	NA	NA	NA	NA
LMP	LMP_to_OBP	Colec12	FALSE	4.9e-07	8.5e-05	25.3011	0.731952	NA	NA	NA	NA	NA	NA	NA	NA	NA
LMP	LMP_to_OBP	Clec11a	FALSE	5.84e-07	0.000100449	24.9632	0.850059	NA	NA	NA	NA	NA	NA	NA	NA	NA
LMP	LMP_to_OBP	Pfkfb3	FALSE	5.93e-07	0.000101136	24.9349	1.05883	NA	NA	NA	NA	NA	NA	NA	NA	NA
LMP	LMP_to_OBP	Atad2	FALSE	6.1e-07	0.000103258	24.8799	1.19478	NA	NA	NA	NA	NA	NA	NA	NA	NA
LMP	LMP_to_OBP	Ramp1	FALSE	6.6e-07	0.000110808	24.729	0.723726	NA	NA	NA	NA	NA	NA	NA	NA	NA
LMP	LMP_to_OBP	Itga11	FALSE	6.88e-07	0.000114655	24.6484	0.91176	NA	NA	NA	NA	NA	NA	NA	NA	NA
LMP	LMP_to_OBP	Ccdc34	FALSE	7.85e-07	0.000129861	24.3938	0.905996	NA	NA	NA	NA	NA	NA	NA	NA	NA
LMP	LMP_to_OBP	Itgbl1	FALSE	8.24e-07	0.000135254	24.3009	1.17086	NA	NA	NA	NA	NA	NA	NA	NA	NA
LMP	LMP_to_OBP	Dmp1	FALSE	8.44e-07	0.000137465	24.2553	-1.07947	NA	NA	NA	NA	NA	NA	NA	NA	NA
LMP	LMP_to_OBP	Nfatc4	FALSE	9.02e-07	0.000145819	24.1273	1.15633	NA	NA	NA	NA	NA	NA	NA	NA	NA
LMP	LMP_to_OBP	Lman1	FALSE	9.12e-07	0.000146417	24.1052	0.618904	NA	NA	NA	NA	NA	NA	NA	NA	NA
LMP	LMP_to_OBP	Actn4	FALSE	9.25e-07	0.000147376	24.0785	0.641057	NA	NA	NA	NA	NA	NA	NA	NA	NA
LMP	LMP_to_OBP	Slc44a1	FALSE	9.87e-07	0.000156142	23.9533	0.74244	NA	NA	NA	NA	NA	NA	NA	NA	NA
LMP	LMP_to_OBP	Hapln1	FALSE	1.01e-06	0.000158739	23.9076	2.59322	NA	NA	NA	NA	NA	NA	NA	NA	NA
LMP	LMP_to_OBP	Utrn	FALSE	1.05e-06	0.000164462	23.8256	0.73637	NA	NA	NA	NA	NA	NA	NA	NA	NA
LMP	LMP_to_OBP	Nrbf2	FALSE	1.06e-06	0.000164774	23.8083	0.729399	NA	NA	NA	NA	NA	NA	NA	NA	NA
LMP	LMP_to_OBP	Fhl1	FALSE	1.09e-06	0.000167207	23.7665	0.998611	NA	NA	NA	NA	NA	NA	NA	NA	NA
LMP	LMP_to_OBP	Nusap1	FALSE	1.11e-06	0.000168737	23.7354	2.33182	NA	NA	NA	NA	NA	NA	NA	NA	NA
LMP	LMP_to_OBP	Nexn	FALSE	1.14e-06	0.00017245	23.6801	0.873799	NA	NA	NA	NA	NA	NA	NA	NA	NA
LMP	LMP_to_OBP	Pbrm1	FALSE	1.17e-06	0.000175903	23.6287	0.679734	NA	NA	NA	NA	NA	NA	NA	NA	NA
LMP	LMP_to_OBP	Enah	FALSE	1.2e-06	0.000178446	23.5826	0.698927	NA	NA	NA	NA	NA	NA	NA	NA	NA
LMP	LMP_to_OBP	Slc1a1	FALSE	1.2e-06	0.000178446	23.5703	1.74533	NA	NA	NA	NA	NA	NA	NA	NA	NA
LMP	LMP_to_OBP	Gsn	FALSE	1.21e-06	0.000178446	23.5617	0.618301	NA	NA	NA	NA	NA	NA	NA	NA	NA
LMP	LMP_to_OBP	Esyt2	FALSE	1.36e-06	0.000199424	23.3349	0.776146	NA	NA	NA	NA	NA	NA	NA	NA	NA
LMP	LMP_to_OBP	Fst	FALSE	1.47e-06	0.00021324	23.1932	0.781665	NA	NA	NA	NA	NA	NA	NA	NA	NA
LMP	LMP_to_OBP	mt-Co1	FALSE	1.64e-06	0.000237612	22.9723	0.586186	NA	NA	NA	NA	NA	NA	NA	NA	NA
LMP	LMP_to_OBP	Dpysl2	FALSE	1.8e-06	0.000258153	22.8003	0.742054	NA	NA	NA	NA	NA	NA	NA	NA	NA
LMP	LMP_to_OBP	Tacc3	FALSE	1.81e-06	0.000258647	22.784	1.5798	NA	NA	NA	NA	NA	NA	NA	NA	NA
LMP	LMP_to_OBP	Hspb7	FALSE	1.84e-06	0.00026042	22.7583	0.80776	NA	NA	NA	NA	NA	NA	NA	NA	NA
LMP	LMP_to_OBP	Hmga1	FALSE	1.98e-06	0.000278579	22.6164	-2.36871	NA	NA	NA	NA	NA	NA	NA	NA	NA
LMP	LMP_to_OBP	Btg2	FALSE	2.06e-06	0.000286259	22.5417	0.703484	NA	NA	NA	NA	NA	NA	NA	NA	NA
LMP	LMP_to_OBP	Eno2	FALSE	2.06e-06	0.000286259	22.5395	1.18791	NA	NA	NA	NA	NA	NA	NA	NA	NA
LMP	LMP_to_OBP	Fkbp14	FALSE	2.2e-06	0.00030407	22.4114	0.799788	NA	NA	NA	NA	NA	NA	NA	NA	NA
LMP	LMP_to_OBP	Plk4	FALSE	2.47e-06	0.000339643	22.1868	1.45551	NA	NA	NA	NA	NA	NA	NA	NA	NA
LMP	LMP_to_OBP	Car9	FALSE	2.6e-06	0.000354277	22.0938	2.01484	NA	NA	NA	NA	NA	NA	NA	NA	NA
LMP	LMP_to_OBP	Acta2	FALSE	2.64e-06	0.000358517	22.059	0.989539	NA	NA	NA	NA	NA	NA	NA	NA	NA
LMP	LMP_to_OBP	Rell1	FALSE	2.76e-06	0.000371596	21.9783	0.931973	NA	NA	NA	NA	NA	NA	NA	NA	NA
LMP	LMP_to_OBP	Kctd9	FALSE	2.96e-06	0.000396709	21.841	1.22102	NA	NA	NA	NA	NA	NA	NA	NA	NA
LMP	LMP_to_OBP	Dnajc10	FALSE	3.15e-06	0.000419051	21.7242	0.723103	NA	NA	NA	NA	NA	NA	NA	NA	NA
LMP	LMP_to_OBP	Sorbs1	FALSE	3.28e-06	0.00043346	21.6476	1.29305	NA	NA	NA	NA	NA	NA	NA	NA	NA
LMP	LMP_to_OBP	mt-Nd4	FALSE	3.33e-06	0.000438302	21.6147	0.564576	NA	NA	NA	NA	NA	NA	NA	NA	NA
LMP	LMP_to_OBP	Lama4	FALSE	3.42e-06	0.000447628	21.5628	0.953575	NA	NA	NA	NA	NA	NA	NA	NA	NA
LMP	LMP_to_OBP	Tnfrsf12a	FALSE	3.61e-06	0.000466671	21.4601	-0.806867	NA	NA	NA	NA	NA	NA	NA	NA	NA
LMP	LMP_to_OBP	Sptbn1	FALSE	3.86e-06	0.000495388	21.3343	0.728024	NA	NA	NA	NA	NA	NA	NA	NA	NA
LMP	LMP_to_OBP	Smtn	FALSE	3.97e-06	0.000507413	21.2771	0.906192	NA	NA	NA	NA	NA	NA	NA	NA	NA
LMP	LMP_to_OBP	Inhba	FALSE	4.06e-06	0.0005156	21.2352	0.92566	NA	NA	NA	NA	NA	NA	NA	NA	NA
LMP	LMP_to_OBP	Zbtb20	FALSE	4.2e-06	0.000529461	21.1733	0.655955	NA	NA	NA	NA	NA	NA	NA	NA	NA
LMP	LMP_to_OBP	Rock2	FALSE	4.46e-06	0.000559193	21.0575	0.672382	NA	NA	NA	NA	NA	NA	NA	NA	NA
LMP	LMP_to_OBP	Fam46a	FALSE	4.65e-06	0.000580011	20.9765	0.684109	NA	NA	NA	NA	NA	NA	NA	NA	NA
LMP	LMP_to_OBP	Hmga1b	FALSE	4.88e-06	0.00060587	20.8821	-2.26304	NA	NA	NA	NA	NA	NA	NA	NA	NA
LMP	LMP_to_OBP	Pappa2	FALSE	5.36e-06	0.000660527	20.7058	1.48674	NA	NA	NA	NA	NA	NA	NA	NA	NA
LMP	LMP_to_OBP	Ncapg	FALSE	5.57e-06	0.000683168	20.6305	2.5211	NA	NA	NA	NA	NA	NA	NA	NA	NA
LMP	LMP_to_OBP	Hspg2	FALSE	5.62e-06	0.000685388	20.6135	0.697579	NA	NA	NA	NA	NA	NA	NA	NA	NA
LMP	LMP_to_OBP	Als2cl	FALSE	5.69e-06	0.000689716	20.5908	0.950522	NA	NA	NA	NA	NA	NA	NA	NA	NA
LMP	LMP_to_OBP	Mid2	FALSE	5.95e-06	0.000718145	20.5029	1.08783	NA	NA	NA	NA	NA	NA	NA	NA	NA
LMP	LMP_to_OBP	Ctsh	FALSE	6.05e-06	0.000725833	20.472	0.701324	NA	NA	NA	NA	NA	NA	NA	NA	NA
LMP	LMP_to_OBP	Arl5a	FALSE	6.19e-06	0.000738266	20.429	0.849457	NA	NA	NA	NA	NA	NA	NA	NA	NA
LMP	LMP_to_OBP	Ddr2	FALSE	6.66e-06	0.000785499	20.2896	0.670636	NA	NA	NA	NA	NA	NA	NA	NA	NA
LMP	LMP_to_OBP	Mia3	FALSE	6.67e-06	0.000785499	20.2845	0.703768	NA	NA	NA	NA	NA	NA	NA	NA	NA
LMP	LMP_to_OBP	Tmem263	FALSE	6.69e-06	0.000785499	20.2792	0.67442	NA	NA	NA	NA	NA	NA	NA	NA	NA
LMP	LMP_to_OBP	Nedd4	FALSE	6.92e-06	0.000808219	20.2144	0.538887	NA	NA	NA	NA	NA	NA	NA	NA	NA
LMP	LMP_to_OBP	Bmp5	FALSE	7.16e-06	0.000831677	20.1495	0.907563	NA	NA	NA	NA	NA	NA	NA	NA	NA
LMP	LMP_to_OBP	Arhgap11a	FALSE	7.32e-06	0.000846059	20.1065	1.7851	NA	NA	NA	NA	NA	NA	NA	NA	NA
LMP	LMP_to_OBP	Prr11	FALSE	7.73e-06	0.00088771	20.0045	2.76764	NA	NA	NA	NA	NA	NA	NA	NA	NA
LMP	LMP_to_OBP	Aspm	FALSE	8.16e-06	0.000927647	19.9004	2.36752	NA	NA	NA	NA	NA	NA	NA	NA	NA
LMP	LMP_to_OBP	Smc2	FALSE	8.16e-06	0.000927647	19.9004	1.24851	NA	NA	NA	NA	NA	NA	NA	NA	NA
LMP	LMP_to_OBP	Ncapg2	FALSE	8.99e-06	0.00101718	19.7143	1.45132	NA	NA	NA	NA	NA	NA	NA	NA	NA
LMP	LMP_to_OBP	Ckap2	FALSE	9.16e-06	0.00103044	19.6797	1.62617	NA	NA	NA	NA	NA	NA	NA	NA	NA
LMP	LMP_to_OBP	Bub1	FALSE	9.58e-06	0.00107204	19.5942	2.09019	NA	NA	NA	NA	NA	NA	NA	NA	NA
LMP	LMP_to_OBP	Ccdc162	FALSE	9.71e-06	0.00108194	19.5669	4.08935	NA	NA	NA	NA	NA	NA	NA	NA	NA
LMP	LMP_to_OBP	Gys1	FALSE	1.04e-05	0.00115323	19.4353	0.867996	NA	NA	NA	NA	NA	NA	NA	NA	NA
LMP	LMP_to_OBP	Rrbp1	FALSE	1.08e-05	0.00118455	19.3652	0.584416	NA	NA	NA	NA	NA	NA	NA	NA	NA
LMP	LMP_to_OBP	Msrb3	FALSE	1.08e-05	0.00118455	19.3648	0.701644	NA	NA	NA	NA	NA	NA	NA	NA	NA
LMP	LMP_to_OBP	Hjurp	FALSE	1.11e-05	0.00120683	19.3197	1.00924	NA	NA	NA	NA	NA	NA	NA	NA	NA
LMP	LMP_to_OBP	Rasgef1a	FALSE	1.16e-05	0.00126224	19.2244	1.05948	NA	NA	NA	NA	NA	NA	NA	NA	NA
LMP	LMP_to_OBP	Kif26b	FALSE	1.17e-05	0.00126715	19.2076	1.68704	NA	NA	NA	NA	NA	NA	NA	NA	NA
LMP	LMP_to_OBP	Fbxo5	FALSE	1.24e-05	0.00133849	19.0936	2.32393	NA	NA	NA	NA	NA	NA	NA	NA	NA
LMP	LMP_to_OBP	Rcn1	FALSE	1.25e-05	0.00133868	19.0839	0.608057	NA	NA	NA	NA	NA	NA	NA	NA	NA
LMP	LMP_to_OBP	Ltbp1	FALSE	1.26e-05	0.00133915	19.0739	0.673952	NA	NA	NA	NA	NA	NA	NA	NA	NA
LMP	LMP_to_OBP	Hspa1b	FALSE	1.31e-05	0.00139358	18.9886	1.20443	NA	NA	NA	NA	NA	NA	NA	NA	NA
LMP	LMP_to_OBP	Adamts4	FALSE	1.36e-05	0.00143526	18.9185	1.13182	NA	NA	NA	NA	NA	NA	NA	NA	NA
LMP	LMP_to_OBP	Ttc28	FALSE	1.37e-05	0.00143526	18.914	0.773401	NA	NA	NA	NA	NA	NA	NA	NA	NA
LMP	LMP_to_OBP	Slc38a10	FALSE	1.43e-05	0.00149834	18.8228	0.685088	NA	NA	NA	NA	NA	NA	NA	NA	NA
LMP	LMP_to_OBP	Aurkb	FALSE	1.45e-05	0.00150444	18.8059	1.86618	NA	NA	NA	NA	NA	NA	NA	NA	NA
LMP	LMP_to_OBP	Lmnb1	FALSE	1.5e-05	0.00154533	18.7403	1.48783	NA	NA	NA	NA	NA	NA	NA	NA	NA
LMP	LMP_to_OBP	Slc26a2	FALSE	1.5e-05	0.00154533	18.7367	0.951445	NA	NA	NA	NA	NA	NA	NA	NA	NA
LMP	LMP_to_OBP	Ckap5	FALSE	1.55e-05	0.00159204	18.6709	0.853732	NA	NA	NA	NA	NA	NA	NA	NA	NA
LMP	LMP_to_OBP	Glg1	FALSE	1.57e-05	0.00160593	18.6454	0.704629	NA	NA	NA	NA	NA	NA	NA	NA	NA
LMP	LMP_to_OBP	Plod1	FALSE	1.76e-05	0.0017916	18.428	0.742389	NA	NA	NA	NA	NA	NA	NA	NA	NA
LMP	LMP_to_OBP	Dlg4	FALSE	1.78e-05	0.00179413	18.4128	0.938924	NA	NA	NA	NA	NA	NA	NA	NA	NA
LMP	LMP_to_OBP	Fbln5	FALSE	1.78e-05	0.00179413	18.4077	0.752527	NA	NA	NA	NA	NA	NA	NA	NA	NA
LMP	LMP_to_OBP	Tacc1	FALSE	1.87e-05	0.00187707	18.3128	0.651573	NA	NA	NA	NA	NA	NA	NA	NA	NA
LMP	LMP_to_OBP	Myo9a	FALSE	1.91e-05	0.00190246	18.2785	0.827846	NA	NA	NA	NA	NA	NA	NA	NA	NA
LMP	LMP_to_OBP	Maged1	FALSE	1.93e-05	0.00191022	18.2621	0.593811	NA	NA	NA	NA	NA	NA	NA	NA	NA
LMP	LMP_to_OBP	Cbx5	FALSE	1.93e-05	0.00191036	18.2533	0.773118	NA	NA	NA	NA	NA	NA	NA	NA	NA
LMP	LMP_to_OBP	Anln	FALSE	2.02e-05	0.00198523	18.1688	1.65639	NA	NA	NA	NA	NA	NA	NA	NA	NA
LMP	LMP_to_OBP	Susd5	FALSE	2.03e-05	0.00198523	18.1629	1.27185	NA	NA	NA	NA	NA	NA	NA	NA	NA
LMP	LMP_to_OBP	Col15a1	FALSE	2.04e-05	0.00199242	18.1475	1.16925	NA	NA	NA	NA	NA	NA	NA	NA	NA
LMP	LMP_to_OBP	Arhgef19	FALSE	2.08e-05	0.00202162	18.1113	1.00838	NA	NA	NA	NA	NA	NA	NA	NA	NA
LMP	LMP_to_OBP	Actg1	FALSE	2.14e-05	0.00206743	18.0602	0.585778	NA	NA	NA	NA	NA	NA	NA	NA	NA
LMP	LMP_to_OBP	Mboat2	FALSE	2.2e-05	0.00211265	18.0106	1.25783	NA	NA	NA	NA	NA	NA	NA	NA	NA
LMP	LMP_to_OBP	Fam162a	FALSE	2.31e-05	0.00221245	17.9144	0.639929	NA	NA	NA	NA	NA	NA	NA	NA	NA
LMP	LMP_to_OBP	A930033H14Rik	FALSE	2.32e-05	0.00221318	17.9038	0.94274	NA	NA	NA	NA	NA	NA	NA	NA	NA
LMP	LMP_to_OBP	Kif20b	FALSE	2.33e-05	0.00221318	17.8972	1.92762	NA	NA	NA	NA	NA	NA	NA	NA	NA
LMP	LMP_to_OBP	Pgm2	FALSE	2.35e-05	0.00222544	17.8784	0.741541	NA	NA	NA	NA	NA	NA	NA	NA	NA
LMP	LMP_to_OBP	Gas2l3	FALSE	2.42e-05	0.00227303	17.8299	1.31438	NA	NA	NA	NA	NA	NA	NA	NA	NA
LMP	LMP_to_OBP	Lrrc17	FALSE	2.49e-05	0.00232899	17.7754	1.50963	NA	NA	NA	NA	NA	NA	NA	NA	NA
LMP	LMP_to_OBP	Fkbp9	FALSE	2.59e-05	0.00241924	17.695	0.595873	NA	NA	NA	NA	NA	NA	NA	NA	NA
LMP	LMP_to_OBP	Tpx2	FALSE	2.64e-05	0.00244093	17.6599	1.55383	NA	NA	NA	NA	NA	NA	NA	NA	NA
LMP	LMP_to_OBP	Ccnb1	FALSE	2.64e-05	0.00244093	17.6575	1.68227	NA	NA	NA	NA	NA	NA	NA	NA	NA
LMP	LMP_to_OBP	Slc2a1	FALSE	2.65e-05	0.00244093	17.6538	0.808383	NA	NA	NA	NA	NA	NA	NA	NA	NA
LMP	LMP_to_OBP	Kank2	FALSE	2.68e-05	0.00246191	17.6295	0.736264	NA	NA	NA	NA	NA	NA	NA	NA	NA
LMP	LMP_to_OBP	Gm28723	FALSE	2.85e-05	0.00260285	17.5156	1.48103	NA	NA	NA	NA	NA	NA	NA	NA	NA
LMP	LMP_to_OBP	Chsy1	FALSE	3.05e-05	0.00277344	17.387	0.703523	NA	NA	NA	NA	NA	NA	NA	NA	NA
LMP	LMP_to_OBP	Egln3	FALSE	3.09e-05	0.00279619	17.3594	0.950532	NA	NA	NA	NA	NA	NA	NA	NA	NA
LMP	LMP_to_OBP	Lmod1	FALSE	3.1e-05	0.00279619	17.3557	1.5639	NA	NA	NA	NA	NA	NA	NA	NA	NA
LMP	LMP_to_OBP	Cpd	FALSE	3.21e-05	0.00288465	17.2887	0.758364	NA	NA	NA	NA	NA	NA	NA	NA	NA
LMP	LMP_to_OBP	Flna	FALSE	3.27e-05	0.00292572	17.254	0.635904	NA	NA	NA	NA	NA	NA	NA	NA	NA
LMP	LMP_to_OBP	Spc24	FALSE	3.3e-05	0.00293983	17.2371	1.23084	NA	NA	NA	NA	NA	NA	NA	NA	NA
LMP	LMP_to_OBP	mt-Nd2	FALSE	3.38e-05	0.003001	17.1903	0.584634	NA	NA	NA	NA	NA	NA	NA	NA	NA
LMP	LMP_to_OBP	Dact3	FALSE	3.41e-05	0.00301102	17.1762	1.18056	NA	NA	NA	NA	NA	NA	NA	NA	NA
LMP	LMP_to_OBP	Spc25	FALSE	3.67e-05	0.0032278	17.0365	1.65011	NA	NA	NA	NA	NA	NA	NA	NA	NA
LMP	LMP_to_OBP	Ccna2	FALSE	3.82e-05	0.00335355	16.9563	1.76453	NA	NA	NA	NA	NA	NA	NA	NA	NA
LMP	LMP_to_OBP	C1qtnf3	FALSE	3.96e-05	0.00344525	16.8927	2.07568	NA	NA	NA	NA	NA	NA	NA	NA	NA
LMP	LMP_to_OBP	Tgfb2	FALSE	3.98e-05	0.00344525	16.8808	0.893014	NA	NA	NA	NA	NA	NA	NA	NA	NA
LMP	LMP_to_OBP	mt-Co3	FALSE	3.98e-05	0.00344525	16.8796	0.531271	NA	NA	NA	NA	NA	NA	NA	NA	NA
LMP	LMP_to_OBP	Plcb4	FALSE	3.99e-05	0.00344525	16.8749	1.4257	NA	NA	NA	NA	NA	NA	NA	NA	NA
LMP	LMP_to_OBP	Synpo2	FALSE	4.07e-05	0.00350029	16.8373	2.86124	NA	NA	NA	NA	NA	NA	NA	NA	NA
LMP	LMP_to_OBP	3632451O06Rik	FALSE	4.12e-05	0.00352521	16.8164	1.90295	NA	NA	NA	NA	NA	NA	NA	NA	NA
LMP	LMP_to_OBP	Nampt	FALSE	4.19e-05	0.00357209	16.7839	0.728744	NA	NA	NA	NA	NA	NA	NA	NA	NA
LMP	LMP_to_OBP	Fat3	FALSE	4.22e-05	0.00358227	16.7711	0.907542	NA	NA	NA	NA	NA	NA	NA	NA	NA
LMP	LMP_to_OBP	Npnt	FALSE	4.26e-05	0.00360599	16.7512	0.903285	NA	NA	NA	NA	NA	NA	NA	NA	NA
LMP	LMP_to_OBP	Trim59	FALSE	4.33e-05	0.00364942	16.7211	1.23929	NA	NA	NA	NA	NA	NA	NA	NA	NA
LMP	LMP_to_OBP	Irgc1	FALSE	4.39e-05	0.00368873	16.6935	1.92278	NA	NA	NA	NA	NA	NA	NA	NA	NA
LMP	LMP_to_OBP	Esco2	FALSE	4.43e-05	0.00370644	16.6771	2.37207	NA	NA	NA	NA	NA	NA	NA	NA	NA
LMP	LMP_to_OBP	P3h2	FALSE	4.53e-05	0.00377869	16.6332	1.29937	NA	NA	NA	NA	NA	NA	NA	NA	NA
LMP	LMP_to_OBP	Ctnnb1	FALSE	4.57e-05	0.00379727	16.6167	0.548544	NA	NA	NA	NA	NA	NA	NA	NA	NA
LMP	LMP_to_OBP	Hip1	FALSE	4.73e-05	0.00391512	16.5516	0.780558	NA	NA	NA	NA	NA	NA	NA	NA	NA
LMP	LMP_to_OBP	Mme	FALSE	4.86e-05	0.00400373	16.5019	0.850549	NA	NA	NA	NA	NA	NA	NA	NA	NA
LMP	LMP_to_OBP	Knl1	FALSE	5.06e-05	0.00415078	16.4264	2.05045	NA	NA	NA	NA	NA	NA	NA	NA	NA
LMP	LMP_to_OBP	Tmem65	FALSE	5.1e-05	0.00416793	16.4115	0.667617	NA	NA	NA	NA	NA	NA	NA	NA	NA
LMP	LMP_to_OBP	Nuf2	FALSE	5.24e-05	0.00427074	16.3582	1.95448	NA	NA	NA	NA	NA	NA	NA	NA	NA
LMP	LMP_to_OBP	Mki67	FALSE	5.31e-05	0.00431007	16.3338	1.70092	NA	NA	NA	NA	NA	NA	NA	NA	NA
LMP	LMP_to_OBP	Slpi	FALSE	5.39e-05	0.00436145	16.3043	-1.3275	NA	NA	NA	NA	NA	NA	NA	NA	NA
LMP	LMP_to_OBP	Ncapd2	FALSE	5.64e-05	0.00454077	16.221	1.44315	NA	NA	NA	NA	NA	NA	NA	NA	NA
LMP	LMP_to_OBP	Comtd1	FALSE	5.74e-05	0.00459269	16.1879	-0.951293	NA	NA	NA	NA	NA	NA	NA	NA	NA
LMP	LMP_to_OBP	Racgap1	FALSE	5.74e-05	0.00459269	16.1855	1.40906	NA	NA	NA	NA	NA	NA	NA	NA	NA
LMP	LMP_to_OBP	Egr1	FALSE	5.99e-05	0.00477207	16.106	0.677063	NA	NA	NA	NA	NA	NA	NA	NA	NA
LMP	LMP_to_OBP	Cers6	FALSE	6.04e-05	0.00479109	16.0916	1.0783	NA	NA	NA	NA	NA	NA	NA	NA	NA
LMP	LMP_to_OBP	Ckap2l	FALSE	6.11e-05	0.00483108	16.069	1.81422	NA	NA	NA	NA	NA	NA	NA	NA	NA
LMP	LMP_to_OBP	Trip11	FALSE	6.36e-05	0.00500978	15.9933	0.733787	NA	NA	NA	NA	NA	NA	NA	NA	NA
LMP	LMP_to_OBP	Abtb2	FALSE	6.66e-05	0.00521151	15.906	0.8033	NA	NA	NA	NA	NA	NA	NA	NA	NA
LMP	LMP_to_OBP	Chst11	FALSE	6.66e-05	0.00521151	15.905	0.809196	NA	NA	NA	NA	NA	NA	NA	NA	NA
LMP	LMP_to_OBP	Crlf1	FALSE	7.15e-05	0.00557139	15.7719	0.893396	NA	NA	NA	NA	NA	NA	NA	NA	NA
LMP	LMP_to_OBP	Cd248	FALSE	7.27e-05	0.00565118	15.7382	1.31482	NA	NA	NA	NA	NA	NA	NA	NA	NA
LMP	LMP_to_OBP	Pde4dip	FALSE	7.74e-05	0.00599204	15.6207	0.868752	NA	NA	NA	NA	NA	NA	NA	NA	NA
LMP	LMP_to_OBP	Copb2	FALSE	7.79e-05	0.00600667	15.6094	0.587301	NA	NA	NA	NA	NA	NA	NA	NA	NA
LMP	LMP_to_OBP	Sncaip	FALSE	7.89e-05	0.00605777	15.5856	0.991535	NA	NA	NA	NA	NA	NA	NA	NA	NA
LMP	LMP_to_OBP	Mtss1l	FALSE	7.91e-05	0.00605777	15.5801	0.769841	NA	NA	NA	NA	NA	NA	NA	NA	NA
LMP	LMP_to_OBP	Plk1	FALSE	8.04e-05	0.00613556	15.5493	1.84149	NA	NA	NA	NA	NA	NA	NA	NA	NA
LMP	LMP_to_OBP	Slc16a3	FALSE	8.11e-05	0.00616965	15.5323	0.696389	NA	NA	NA	NA	NA	NA	NA	NA	NA
LMP	LMP_to_OBP	Creb3l1	FALSE	8.35e-05	0.00633173	15.4767	0.595753	NA	NA	NA	NA	NA	NA	NA	NA	NA
LMP	LMP_to_OBP	Scd2	FALSE	8.41e-05	0.00635614	15.4628	0.682854	NA	NA	NA	NA	NA	NA	NA	NA	NA
LMP	LMP_to_OBP	Acan	FALSE	8.54e-05	0.00639829	15.4355	3.16854	NA	NA	NA	NA	NA	NA	NA	NA	NA
LMP	LMP_to_OBP	Pdk1	FALSE	8.58e-05	0.00639829	15.4258	0.792935	NA	NA	NA	NA	NA	NA	NA	NA	NA
LMP	LMP_to_OBP	Exoc4	FALSE	8.58e-05	0.00639829	15.4252	0.72711	NA	NA	NA	NA	NA	NA	NA	NA	NA
LMP	LMP_to_OBP	Cox4i2	FALSE	8.59e-05	0.00639829	15.4244	0.770735	NA	NA	NA	NA	NA	NA	NA	NA	NA
LMP	LMP_to_OBP	Cenpe	FALSE	8.65e-05	0.00642059	15.4114	1.75689	NA	NA	NA	NA	NA	NA	NA	NA	NA
LMP	LMP_to_OBP	Fam189a2	FALSE	8.79e-05	0.0064928	15.3792	1.2205	NA	NA	NA	NA	NA	NA	NA	NA	NA
LMP	LMP_to_OBP	Clspn	FALSE	8.8e-05	0.0064928	15.3774	1.88925	NA	NA	NA	NA	NA	NA	NA	NA	NA
LMP	LMP_to_OBP	Fabp5	FALSE	9.07e-05	0.00666606	15.3213	0.797968	NA	NA	NA	NA	NA	NA	NA	NA	NA
LMP	LMP_to_OBP	Dclk1	FALSE	9.44e-05	0.00691364	15.2461	0.823248	NA	NA	NA	NA	NA	NA	NA	NA	NA
LMP	LMP_to_OBP	Pmp22	FALSE	9.64e-05	0.00704121	15.2052	0.775589	NA	NA	NA	NA	NA	NA	NA	NA	NA
LMP	LMP_to_OBP	Pros1	FALSE	9.71e-05	0.00706789	15.1918	0.772804	NA	NA	NA	NA	NA	NA	NA	NA	NA
LMP	LMP_to_OBP	Dhx40	FALSE	0.000100366	0.0072794	15.1298	0.770045	NA	NA	NA	NA	NA	NA	NA	NA	NA
LMP	LMP_to_OBP	Dnajb4	FALSE	0.000102901	0.00743851	15.0827	0.67944	NA	NA	NA	NA	NA	NA	NA	NA	NA
LMP	LMP_to_OBP	Iqgap3	FALSE	0.000104004	0.00749342	15.0626	2.10796	NA	NA	NA	NA	NA	NA	NA	NA	NA
LMP	LMP_to_OBP	Myadm	FALSE	0.000105495	0.00757587	15.0357	0.669567	NA	NA	NA	NA	NA	NA	NA	NA	NA
LMP	LMP_to_OBP	Man2a1	FALSE	0.000106373	0.00761387	15.0201	0.81805	NA	NA	NA	NA	NA	NA	NA	NA	NA
LMP	LMP_to_OBP	Tnks	FALSE	0.000109236	0.00779321	14.97	0.774698	NA	NA	NA	NA	NA	NA	NA	NA	NA
LMP	LMP_to_OBP	Edil3	FALSE	0.000109888	0.00781424	14.9587	1.03925	NA	NA	NA	NA	NA	NA	NA	NA	NA
LMP	LMP_to_OBP	Hmmr	FALSE	0.000114274	0.00809353	14.8849	1.82033	NA	NA	NA	NA	NA	NA	NA	NA	NA
LMP	LMP_to_OBP	Gucy1b1	FALSE	0.000114557	0.00809353	14.8802	1.23729	NA	NA	NA	NA	NA	NA	NA	NA	NA
LMP	LMP_to_OBP	Smurf2	FALSE	0.000118721	0.00834751	14.8129	0.651637	NA	NA	NA	NA	NA	NA	NA	NA	NA
LMP	LMP_to_OBP	Fam198b	FALSE	0.000118917	0.00834751	14.8098	0.934162	NA	NA	NA	NA	NA	NA	NA	NA	NA
LMP	LMP_to_OBP	Rcn3	FALSE	0.000119406	0.00835499	14.802	0.567643	NA	NA	NA	NA	NA	NA	NA	NA	NA
LMP	LMP_to_OBP	Tmem119	FALSE	0.000119852	0.00835937	14.795	0.69283	NA	NA	NA	NA	NA	NA	NA	NA	NA
LMP	LMP_to_OBP	Cenpw	FALSE	0.000120812	0.00839279	14.78	1.0107	NA	NA	NA	NA	NA	NA	NA	NA	NA
LMP	LMP_to_OBP	Lnpep	FALSE	0.0001211	0.00839279	14.7755	0.681674	NA	NA	NA	NA	NA	NA	NA	NA	NA
LMP	LMP_to_OBP	Sec31a	FALSE	0.000124396	0.00859395	14.7248	0.563443	NA	NA	NA	NA	NA	NA	NA	NA	NA
LMP	LMP_to_OBP	Atp2b4	FALSE	0.000133489	0.00919305	14.5919	0.898219	NA	NA	NA	NA	NA	NA	NA	NA	NA
LMP	LMP_to_OBP	Neo1	FALSE	0.00013442	0.00922808	14.5788	0.725726	NA	NA	NA	NA	NA	NA	NA	NA	NA
LMP	LMP_to_OBP	Copa	FALSE	0.000137326	0.00939563	14.5385	0.582602	NA	NA	NA	NA	NA	NA	NA	NA	NA
LMP	LMP_to_OBP	Cpxm1	FALSE	0.000137722	0.00939563	14.5331	1.03517	NA	NA	NA	NA	NA	NA	NA	NA	NA
LMP	LMP_to_OBP	Adm	FALSE	0.000138761	0.00943707	14.5189	0.929455	NA	NA	NA	NA	NA	NA	NA	NA	NA
LMP	LMP_to_OBP	Ptch1	FALSE	0.00014063	0.00953443	14.4937	0.876403	NA	NA	NA	NA	NA	NA	NA	NA	NA
LMP	LMP_to_OBP	4932438A13Rik	FALSE	0.000144955	0.00976725	14.4366	0.700847	NA	NA	NA	NA	NA	NA	NA	NA	NA
LMP	LMP_to_OBP	Mis18bp1	FALSE	0.000144958	0.00976725	14.4366	1.94922	NA	NA	NA	NA	NA	NA	NA	NA	NA
LMP	LMP_to_OBP	Cdc42bpa	FALSE	0.000148583	0.00996063	14.3901	0.696036	NA	NA	NA	NA	NA	NA	NA	NA	NA
LMP	LMP_to_OBP	Bsg	FALSE	0.000148741	0.00996063	14.3881	0.56185	NA	NA	NA	NA	NA	NA	NA	NA	NA
LMP	LMP_to_OBP	Gucy1a1	FALSE	0.000150176	0.010026	14.37	0.826381	NA	NA	NA	NA	NA	NA	NA	NA	NA
LMP	LMP_to_OBP	Fam117b	FALSE	0.000151133	0.0100591	14.358	0.848426	NA	NA	NA	NA	NA	NA	NA	NA	NA
LMP	LMP_to_OBP	Cd2ap	FALSE	0.000156178	0.0103633	14.2962	0.615481	NA	NA	NA	NA	NA	NA	NA	NA	NA
LMP	LMP_to_OBP	Dysf	FALSE	0.00016197	0.0107151	14.2277	0.80651	NA	NA	NA	NA	NA	NA	NA	NA	NA
LMP	LMP_to_OBP	Sgo1	FALSE	0.000176343	0.0116225	14.0677	1.80274	NA	NA	NA	NA	NA	NA	NA	NA	NA
LMP	LMP_to_OBP	Col8a2	FALSE	0.000176752	0.0116225	14.0634	1.43262	NA	NA	NA	NA	NA	NA	NA	NA	NA
LMP	LMP_to_OBP	Mindy2	FALSE	0.000193955	0.0127154	13.8888	0.712286	NA	NA	NA	NA	NA	NA	NA	NA	NA
LMP	LMP_to_OBP	Dixdc1	FALSE	0.000196077	0.0128161	13.8683	0.96773	NA	NA	NA	NA	NA	NA	NA	NA	NA
LMP	LMP_to_OBP	Col16a1	FALSE	0.000197247	0.012854	13.8571	0.881764	NA	NA	NA	NA	NA	NA	NA	NA	NA
LMP	LMP_to_OBP	Nt5e	FALSE	0.000199201	0.0129427	13.8386	0.870919	NA	NA	NA	NA	NA	NA	NA	NA	NA
LMP	LMP_to_OBP	Golim4	FALSE	0.000202076	0.0130906	13.8117	0.670223	NA	NA	NA	NA	NA	NA	NA	NA	NA
LMP	LMP_to_OBP	Depdc1a	FALSE	0.000204147	0.0131856	13.7925	1.95746	NA	NA	NA	NA	NA	NA	NA	NA	NA
LMP	LMP_to_OBP	Shcbp1	FALSE	0.00020837	0.0134187	13.7541	1.63601	NA	NA	NA	NA	NA	NA	NA	NA	NA
LMP	LMP_to_OBP	mt-Nd1	FALSE	0.000210229	0.0134986	13.7374	0.546776	NA	NA	NA	NA	NA	NA	NA	NA	NA
LMP	LMP_to_OBP	Prss23	FALSE	0.000218734	0.0140035	13.6629	0.787947	NA	NA	NA	NA	NA	NA	NA	NA	NA
LMP	LMP_to_OBP	Camk2g	FALSE	0.000221963	0.0141686	13.6354	0.768994	NA	NA	NA	NA	NA	NA	NA	NA	NA
LMP	LMP_to_OBP	Fam241a	FALSE	0.00022984	0.0146287	13.5699	0.876879	NA	NA	NA	NA	NA	NA	NA	NA	NA
LMP	LMP_to_OBP	Cenpa	FALSE	0.000232673	0.014766	13.5469	1.53412	NA	NA	NA	NA	NA	NA	NA	NA	NA
LMP	LMP_to_OBP	Hpgd	FALSE	0.000237308	0.0149847	13.5099	0.86872	NA	NA	NA	NA	NA	NA	NA	NA	NA
LMP	LMP_to_OBP	Sspn	FALSE	0.000237493	0.0149847	13.5084	0.841729	NA	NA	NA	NA	NA	NA	NA	NA	NA
LMP	LMP_to_OBP	Pdia3	FALSE	0.000244725	0.0153965	13.4522	0.551088	NA	NA	NA	NA	NA	NA	NA	NA	NA
LMP	LMP_to_OBP	Slc44a2	FALSE	0.000249351	0.0156425	13.417	0.802725	NA	NA	NA	NA	NA	NA	NA	NA	NA
LMP	LMP_to_OBP	Suz12	FALSE	0.000250805	0.0156886	13.4061	0.753471	NA	NA	NA	NA	NA	NA	NA	NA	NA
LMP	LMP_to_OBP	Lbhd2	FALSE	0.000253526	0.0158135	13.3859	1.48529	NA	NA	NA	NA	NA	NA	NA	NA	NA
LMP	LMP_to_OBP	P4hb	FALSE	0.000258097	0.0160528	13.3524	0.546075	NA	NA	NA	NA	NA	NA	NA	NA	NA
LMP	LMP_to_OBP	Tmem30a	FALSE	0.000260026	0.0160842	13.3384	0.598964	NA	NA	NA	NA	NA	NA	NA	NA	NA
LMP	LMP_to_OBP	Ect2	FALSE	0.000260076	0.0160842	13.338	1.46264	NA	NA	NA	NA	NA	NA	NA	NA	NA
LMP	LMP_to_OBP	Aebp1	FALSE	0.000265805	0.0163921	13.2972	0.643473	NA	NA	NA	NA	NA	NA	NA	NA	NA
LMP	LMP_to_OBP	Gpx3	FALSE	0.000268113	0.0164878	13.281	0.644969	NA	NA	NA	NA	NA	NA	NA	NA	NA
LMP	LMP_to_OBP	Amotl2	FALSE	0.0002711	0.0165389	13.2602	0.6761	NA	NA	NA	NA	NA	NA	NA	NA	NA
LMP	LMP_to_OBP	Wwp2	FALSE	0.000271127	0.0165389	13.26	0.73309	NA	NA	NA	NA	NA	NA	NA	NA	NA
LMP	LMP_to_OBP	Ckb	FALSE	0.000271217	0.0165389	13.2594	0.645106	NA	NA	NA	NA	NA	NA	NA	NA	NA
LMP	LMP_to_OBP	Asb11	FALSE	0.000274395	0.0166861	13.2376	2.44012	NA	NA	NA	NA	NA	NA	NA	NA	NA
LMP	LMP_to_OBP	Fkbp7	FALSE	0.0002807	0.0170078	13.195	0.593436	NA	NA	NA	NA	NA	NA	NA	NA	NA
LMP	LMP_to_OBP	Arl6ip1	FALSE	0.000281243	0.0170078	13.1914	0.698523	NA	NA	NA	NA	NA	NA	NA	NA	NA
LMP	LMP_to_OBP	E2f7	FALSE	0.000283086	0.017072	13.1791	2.67442	NA	NA	NA	NA	NA	NA	NA	NA	NA
LMP	LMP_to_OBP	Cpeb3	FALSE	0.000299841	0.0180216	13.0714	1.13706	NA	NA	NA	NA	NA	NA	NA	NA	NA
LMP	LMP_to_OBP	Hspb6	FALSE	0.000300484	0.0180216	13.0674	0.960829	NA	NA	NA	NA	NA	NA	NA	NA	NA
LMP	LMP_to_OBP	Usp16	FALSE	0.000307623	0.0183993	13.0234	0.644788	NA	NA	NA	NA	NA	NA	NA	NA	NA
LMP	LMP_to_OBP	AW011738	FALSE	0.000311651	0.0185511	12.999	0.698447	NA	NA	NA	NA	NA	NA	NA	NA	NA
LMP	LMP_to_OBP	Rad51ap1	FALSE	0.000311861	0.0185511	12.9978	1.68569	NA	NA	NA	NA	NA	NA	NA	NA	NA
LMP	LMP_to_OBP	Mgll	FALSE	0.000315156	0.0186961	12.9781	0.9066	NA	NA	NA	NA	NA	NA	NA	NA	NA
LMP	LMP_to_OBP	Cks2	FALSE	0.00031867	0.0188534	12.9573	0.765951	NA	NA	NA	NA	NA	NA	NA	NA	NA
LMP	LMP_to_OBP	Chd3	FALSE	0.000336763	0.0198699	12.854	0.702238	NA	NA	NA	NA	NA	NA	NA	NA	NA
LMP	LMP_to_OBP	Wdr74	FALSE	0.000342053	0.0201276	12.8248	-0.872876	NA	NA	NA	NA	NA	NA	NA	NA	NA
LMP	LMP_to_OBP	Jmjd1c	FALSE	0.00034721	0.0203661	12.7968	0.644401	NA	NA	NA	NA	NA	NA	NA	NA	NA
LMP	LMP_to_OBP	2310022B05Rik	FALSE	0.000347971	0.0203661	12.7927	0.556799	NA	NA	NA	NA	NA	NA	NA	NA	NA
LMP	LMP_to_OBP	Eps8	FALSE	0.000350397	0.0204532	12.7797	-1.32686	NA	NA	NA	NA	NA	NA	NA	NA	NA
LMP	LMP_to_OBP	Myom1	FALSE	0.000362393	0.0210971	12.7168	0.980358	NA	NA	NA	NA	NA	NA	NA	NA	NA
LMP	LMP_to_OBP	Itga10	FALSE	0.000366079	0.0212549	12.6978	0.792776	NA	NA	NA	NA	NA	NA	NA	NA	NA
LMP	LMP_to_OBP	Mfap5	FALSE	0.000376061	0.0217766	12.6475	1.47064	NA	NA	NA	NA	NA	NA	NA	NA	NA
LMP	LMP_to_OBP	Ppfibp1	FALSE	0.000384351	0.0221978	12.6068	0.584629	NA	NA	NA	NA	NA	NA	NA	NA	NA
LMP	LMP_to_OBP	C330027C09Rik	FALSE	0.000389777	0.0224518	12.5806	1.35092	NA	NA	NA	NA	NA	NA	NA	NA	NA
LMP	LMP_to_OBP	Atp8b1	FALSE	0.000397163	0.0227184	12.5455	1.55323	NA	NA	NA	NA	NA	NA	NA	NA	NA
LMP	LMP_to_OBP	Magt1	FALSE	0.000397191	0.0227184	12.5454	0.630494	NA	NA	NA	NA	NA	NA	NA	NA	NA
LMP	LMP_to_OBP	Cnn1	FALSE	0.000398228	0.0227184	12.5405	1.35951	NA	NA	NA	NA	NA	NA	NA	NA	NA
LMP	LMP_to_OBP	Tmtc2	FALSE	0.000398569	0.0227184	12.5389	0.917949	NA	NA	NA	NA	NA	NA	NA	NA	NA
LMP	LMP_to_OBP	Cthrc1	FALSE	0.000400714	0.0227812	12.5289	0.699029	NA	NA	NA	NA	NA	NA	NA	NA	NA
LMP	LMP_to_OBP	Trpm4	FALSE	0.000403043	0.0228526	12.518	1.02787	NA	NA	NA	NA	NA	NA	NA	NA	NA
LMP	LMP_to_OBP	Macf1	FALSE	0.000404063	0.0228526	12.5133	0.582904	NA	NA	NA	NA	NA	NA	NA	NA	NA
LMP	LMP_to_OBP	Fto	FALSE	0.000408971	0.0230704	12.4908	0.642764	NA	NA	NA	NA	NA	NA	NA	NA	NA
LMP	LMP_to_OBP	Ikbip	FALSE	0.000418542	0.0234819	12.4475	0.626993	NA	NA	NA	NA	NA	NA	NA	NA	NA
LMP	LMP_to_OBP	Grb10	FALSE	0.000419655	0.0234819	12.4426	0.58045	NA	NA	NA	NA	NA	NA	NA	NA	NA
LMP	LMP_to_OBP	Csrp2	FALSE	0.000420464	0.0234819	12.439	0.663528	NA	NA	NA	NA	NA	NA	NA	NA	NA
LMP	LMP_to_OBP	Ubr2	FALSE	0.000420569	0.0234819	12.4385	0.630354	NA	NA	NA	NA	NA	NA	NA	NA	NA
LMP	LMP_to_OBP	Smarca1	FALSE	0.000428929	0.0238876	12.4018	0.964925	NA	NA	NA	NA	NA	NA	NA	NA	NA
LMP	LMP_to_OBP	Rb1	FALSE	0.000431569	0.0239735	12.3903	0.789543	NA	NA	NA	NA	NA	NA	NA	NA	NA
LMP	LMP_to_OBP	Kif2c	FALSE	0.000438219	0.024223	12.3618	1.95876	NA	NA	NA	NA	NA	NA	NA	NA	NA
LMP	LMP_to_OBP	Ttyh3	FALSE	0.00043828	0.024223	12.3615	0.928674	NA	NA	NA	NA	NA	NA	NA	NA	NA
LMP	LMP_to_OBP	Gaa	FALSE	0.000446124	0.0245943	12.3284	0.629782	NA	NA	NA	NA	NA	NA	NA	NA	NA
LMP	LMP_to_OBP	Rrm2	FALSE	0.000447457	0.0246056	12.3228	1.14063	NA	NA	NA	NA	NA	NA	NA	NA	NA
LMP	LMP_to_OBP	Slc9b2	FALSE	0.000450921	0.0247338	12.3084	1.88435	NA	NA	NA	NA	NA	NA	NA	NA	NA
LMP	LMP_to_OBP	Isg15	FALSE	0.000457186	0.0250146	12.2827	1.06158	NA	NA	NA	NA	NA	NA	NA	NA	NA
LMP	LMP_to_OBP	Ccng2	FALSE	0.000462858	0.0251744	12.2596	0.881614	NA	NA	NA	NA	NA	NA	NA	NA	NA
LMP	LMP_to_OBP	Mical2	FALSE	0.000462865	0.0251744	12.2596	0.678952	NA	NA	NA	NA	NA	NA	NA	NA	NA
LMP	LMP_to_OBP	Rnd3	FALSE	0.000464537	0.0251744	12.2529	0.651897	NA	NA	NA	NA	NA	NA	NA	NA	NA
LMP	LMP_to_OBP	Nuak1	FALSE	0.000464719	0.0251744	12.2522	0.690418	NA	NA	NA	NA	NA	NA	NA	NA	NA
LMP	LMP_to_OBP	Sod3	FALSE	0.000468008	0.0251845	12.239	0.856099	NA	NA	NA	NA	NA	NA	NA	NA	NA
LMP	LMP_to_OBP	Porcn	FALSE	0.000468358	0.0251845	12.2376	0.808705	NA	NA	NA	NA	NA	NA	NA	NA	NA
LMP	LMP_to_OBP	Cplx3	FALSE	0.000468366	0.0251845	12.2376	1.46558	NA	NA	NA	NA	NA	NA	NA	NA	NA
LMP	LMP_to_OBP	Cit	FALSE	0.000472093	0.0253225	12.2228	1.92579	NA	NA	NA	NA	NA	NA	NA	NA	NA
LMP	LMP_to_OBP	Sulf1	FALSE	0.000475247	0.0253736	12.2104	1.57967	NA	NA	NA	NA	NA	NA	NA	NA	NA
LMP	LMP_to_OBP	Eya4	FALSE	0.000475369	0.0253736	12.2099	0.87435	NA	NA	NA	NA	NA	NA	NA	NA	NA
LMP	LMP_to_OBP	Sgo2a	FALSE	0.000478975	0.0255036	12.1958	2.02298	NA	NA	NA	NA	NA	NA	NA	NA	NA
LMP	LMP_to_OBP	Fbn1	FALSE	0.000484761	0.0257404	12.1734	0.812298	NA	NA	NA	NA	NA	NA	NA	NA	NA
LMP	LMP_to_OBP	Lamb2	FALSE	0.000485779	0.0257404	12.1695	0.648618	NA	NA	NA	NA	NA	NA	NA	NA	NA
LMP	LMP_to_OBP	Kremen1	FALSE	0.000490279	0.0259159	12.1523	0.722549	NA	NA	NA	NA	NA	NA	NA	NA	NA
LMP	LMP_to_OBP	Kdm7a	FALSE	0.000496901	0.0262025	12.1273	0.711119	NA	NA	NA	NA	NA	NA	NA	NA	NA
LMP	LMP_to_OBP	Canx	FALSE	0.000503441	0.0264834	12.1029	0.535905	NA	NA	NA	NA	NA	NA	NA	NA	NA
LMP	LMP_to_OBP	Vamp2	FALSE	0.000512471	0.0268937	12.0697	0.662126	NA	NA	NA	NA	NA	NA	NA	NA	NA
LMP	LMP_to_OBP	Smc1a	FALSE	0.000514797	0.0269509	12.0613	0.67156	NA	NA	NA	NA	NA	NA	NA	NA	NA
LMP	LMP_to_OBP	Diaph3	FALSE	0.000524297	0.0273826	12.0272	1.32737	NA	NA	NA	NA	NA	NA	NA	NA	NA
LMP	LMP_to_OBP	Gas6	FALSE	0.000538753	0.0280485	11.9765	0.641444	NA	NA	NA	NA	NA	NA	NA	NA	NA
LMP	LMP_to_OBP	Rgs4	FALSE	0.000539616	0.0280485	11.9735	1.07681	NA	NA	NA	NA	NA	NA	NA	NA	NA
LMP	LMP_to_OBP	Mxra8	FALSE	0.000543368	0.0281764	11.9606	0.60644	NA	NA	NA	NA	NA	NA	NA	NA	NA
LMP	LMP_to_OBP	Nedd9	FALSE	0.000549892	0.0284471	11.9384	0.643493	NA	NA	NA	NA	NA	NA	NA	NA	NA
LMP	LMP_to_OBP	Pfkp	FALSE	0.000563987	0.0290834	11.8912	0.755863	NA	NA	NA	NA	NA	NA	NA	NA	NA
LMP	LMP_to_OBP	Kif4	FALSE	0.000565159	0.0290834	11.8874	1.76975	NA	NA	NA	NA	NA	NA	NA	NA	NA
LMP	LMP_to_OBP	Gm45847	FALSE	0.000566188	0.0290834	11.884	1.39924	NA	NA	NA	NA	NA	NA	NA	NA	NA
LMP	LMP_to_OBP	Zfp365	FALSE	0.00060266	0.0308842	11.7677	0.825609	NA	NA	NA	NA	NA	NA	NA	NA	NA
LMP	LMP_to_OBP	Stmn1	FALSE	0.000617501	0.0315706	11.7225	1.0621	NA	NA	NA	NA	NA	NA	NA	NA	NA
LMP	LMP_to_OBP	Iqgap1	FALSE	0.000621596	0.0316101	11.7102	0.584724	NA	NA	NA	NA	NA	NA	NA	NA	NA
LMP	LMP_to_OBP	Islr	FALSE	0.000622552	0.0316101	11.7073	0.738108	NA	NA	NA	NA	NA	NA	NA	NA	NA
LMP	LMP_to_OBP	Aox4	FALSE	0.000622616	0.0316101	11.7071	4.69751	NA	NA	NA	NA	NA	NA	NA	NA	NA
LMP	LMP_to_OBP	Igf1r	FALSE	0.00063124	0.0319322	11.6815	0.619381	NA	NA	NA	NA	NA	NA	NA	NA	NA
LMP	LMP_to_OBP	Lmo7	FALSE	0.000631886	0.0319322	11.6796	0.743391	NA	NA	NA	NA	NA	NA	NA	NA	NA
LMP	LMP_to_OBP	Mad2l1	FALSE	0.000641927	0.0323647	11.6503	1.08516	NA	NA	NA	NA	NA	NA	NA	NA	NA
LMP	LMP_to_OBP	Impad1	FALSE	0.000662672	0.0333336	11.5911	0.595528	NA	NA	NA	NA	NA	NA	NA	NA	NA
LMP	LMP_to_OBP	Tab2	FALSE	0.000670763	0.0336631	11.5686	0.615344	NA	NA	NA	NA	NA	NA	NA	NA	NA
LMP	LMP_to_OBP	1700003F12Rik	FALSE	0.000678691	0.0339828	11.5467	0.818836	NA	NA	NA	NA	NA	NA	NA	NA	NA
LMP	LMP_to_OBP	Rasgrp2	FALSE	0.000684489	0.0341947	11.5309	0.828755	NA	NA	NA	NA	NA	NA	NA	NA	NA
LMP	LMP_to_OBP	Knstrn	FALSE	0.000687805	0.0342819	11.5219	1.35671	NA	NA	NA	NA	NA	NA	NA	NA	NA
LMP	LMP_to_OBP	Ndc80	FALSE	0.000707453	0.0351809	11.4696	1.61939	NA	NA	NA	NA	NA	NA	NA	NA	NA
LMP	LMP_to_OBP	Inpp5a	FALSE	0.000717068	0.035578	11.4445	0.669309	NA	NA	NA	NA	NA	NA	NA	NA	NA
LMP	LMP_to_OBP	Incenp	FALSE	0.000720654	0.0356045	11.4352	1.12423	NA	NA	NA	NA	NA	NA	NA	NA	NA
LMP	LMP_to_OBP	Arfgap3	FALSE	0.000720864	0.0356045	11.4347	0.635678	NA	NA	NA	NA	NA	NA	NA	NA	NA
LMP	LMP_to_OBP	AI413582	FALSE	0.000734553	0.0361987	11.3997	-0.805291	NA	NA	NA	NA	NA	NA	NA	NA	NA
LMP	LMP_to_OBP	Frmd6	FALSE	0.000738432	0.0362663	11.3899	0.674419	NA	NA	NA	NA	NA	NA	NA	NA	NA
LMP	LMP_to_OBP	Cmip	FALSE	0.000739247	0.0362663	11.3879	0.806198	NA	NA	NA	NA	NA	NA	NA	NA	NA
LMP	LMP_to_OBP	Adamtsl1	FALSE	0.000756225	0.037016	11.3457	1.5208	NA	NA	NA	NA	NA	NA	NA	NA	NA
LMP	LMP_to_OBP	Ssr3	FALSE	0.000761558	0.0371937	11.3327	0.489067	NA	NA	NA	NA	NA	NA	NA	NA	NA
LMP	LMP_to_OBP	Plekha2	FALSE	0.000788696	0.0384331	11.2676	0.815331	NA	NA	NA	NA	NA	NA	NA	NA	NA
LMP	LMP_to_OBP	Hspa2	FALSE	0.000793392	0.0384978	11.2566	0.846691	NA	NA	NA	NA	NA	NA	NA	NA	NA
LMP	LMP_to_OBP	Cyp20a1	FALSE	0.000793552	0.0384978	11.2563	0.619426	NA	NA	NA	NA	NA	NA	NA	NA	NA
LMP	LMP_to_OBP	Ifi27l2a	FALSE	0.000815207	0.0394607	11.2063	-1.04074	NA	NA	NA	NA	NA	NA	NA	NA	NA
LMP	LMP_to_OBP	Fam83d	FALSE	0.000821018	0.0395787	11.1931	1.59975	NA	NA	NA	NA	NA	NA	NA	NA	NA
LMP	LMP_to_OBP	Adamts1	FALSE	0.00082127	0.0395787	11.1925	0.725318	NA	NA	NA	NA	NA	NA	NA	NA	NA
LMP	LMP_to_OBP	Gpr68	FALSE	0.000840599	0.040421	11.1494	1.40578	NA	NA	NA	NA	NA	NA	NA	NA	NA
LMP	LMP_to_OBP	Fnip1	FALSE	0.000872491	0.0418623	11.0803	0.65995	NA	NA	NA	NA	NA	NA	NA	NA	NA
LMP	LMP_to_OBP	Wtip	FALSE	0.000915873	0.0436704	10.9904	0.671883	NA	NA	NA	NA	NA	NA	NA	NA	NA
LMP	LMP_to_OBP	Hspa1a	FALSE	0.000916606	0.0436704	10.9889	0.925638	NA	NA	NA	NA	NA	NA	NA	NA	NA
LMP	LMP_to_OBP	Slc13a5	FALSE	0.000917987	0.0436704	10.9861	0.717755	NA	NA	NA	NA	NA	NA	NA	NA	NA
LMP	LMP_to_OBP	Msi2	FALSE	0.000918177	0.0436704	10.9857	0.698461	NA	NA	NA	NA	NA	NA	NA	NA	NA
LMP	LMP_to_OBP	Cdc25b	FALSE	0.000925078	0.0438904	10.9718	1.38922	NA	NA	NA	NA	NA	NA	NA	NA	NA
LMP	LMP_to_OBP	Psd3	FALSE	0.000926823	0.0438904	10.9683	0.766218	NA	NA	NA	NA	NA	NA	NA	NA	NA
LMP	LMP_to_OBP	Prrx1	FALSE	0.000937973	0.0443223	10.9462	0.55775	NA	NA	NA	NA	NA	NA	NA	NA	NA
LMP	LMP_to_OBP	Gm16894	FALSE	0.000947896	0.0446944	10.9267	1.77106	NA	NA	NA	NA	NA	NA	NA	NA	NA
LMP	LMP_to_OBP	Fmo2	FALSE	0.000968835	0.0455833	10.8862	-1.34431	NA	NA	NA	NA	NA	NA	NA	NA	NA
LMP	LMP_to_OBP	Tmpo	FALSE	0.000987899	0.0463803	10.8501	0.834831	NA	NA	NA	NA	NA	NA	NA	NA	NA
LMP	LMP_to_OBP	Prss35	FALSE	0.000993465	0.0465415	10.8397	0.779236	NA	NA	NA	NA	NA	NA	NA	NA	NA
LMP	LMP_to_OBP	Galnt1	FALSE	0.00100118	0.0468024	10.8254	0.655492	NA	NA	NA	NA	NA	NA	NA	NA	NA
LMP	LMP_to_OBP	Ugp2	FALSE	0.00102157	0.0476537	10.7881	0.597996	NA	NA	NA	NA	NA	NA	NA	NA	NA
LMP	LMP_to_OBP	Ptpn13	FALSE	0.00102476	0.0477004	10.7823	0.812069	NA	NA	NA	NA	NA	NA	NA	NA	NA
LMP	LMP_to_OBP	Parpbp	FALSE	0.0010721	0.0497819	10.6987	3.30618	NA	NA	NA	NA	NA	NA	NA	NA	NA
LMP	LMP_to_OBP	Ttk	FALSE	0.00107404	0.0497819	10.6954	1.72808	NA	NA	NA	NA	NA	NA	NA	NA	NA
LMP	LMP_to_OBP	Pbxip1	FALSE	0.00107703	0.049815	10.6902	0.684578	NA	NA	NA	NA	NA	NA	NA	NA	NA
LMP	LMP_to_OBP	H19	FALSE	0.00107936	0.0498171	10.6862	1.21969	NA	NA	NA	NA	NA	NA	NA	NA	NA
MPC	MPC_to_LMP	Col11a1	FALSE	0	0	251.545	-4.87977	NA	NA	NA	NA	NA	NA	NA	NA	NA
MPC	MPC_to_LMP	Col1a1	FALSE	0	0	156.526	-3.2658	NA	NA	NA	NA	NA	NA	NA	NA	NA
MPC	MPC_to_LMP	Col1a2	FALSE	0	0	127.323	-2.72733	NA	NA	NA	NA	NA	NA	NA	NA	NA
MPC	MPC_to_LMP	Col11a2	FALSE	0	0	115.283	-4.35299	NA	NA	NA	NA	NA	NA	NA	NA	NA
MPC	MPC_to_LMP	Bglap	FALSE	0	0	109.233	-4.75544	NA	NA	NA	NA	NA	NA	NA	NA	NA
MPC	MPC_to_LMP	Phlda3	FALSE	0	0	107.32	5.00647	NA	NA	NA	NA	NA	NA	NA	NA	NA
MPC	MPC_to_LMP	Timp3	FALSE	0	0	95.6999	6.85929	NA	NA	NA	NA	NA	NA	NA	NA	NA
MPC	MPC_to_LMP	Ncl	FALSE	0	0	89.9891	3.41175	NA	NA	NA	NA	NA	NA	NA	NA	NA
MPC	MPC_to_LMP	Hspe1	FALSE	0	0	81.1299	2.84262	NA	NA	NA	NA	NA	NA	NA	NA	NA
MPC	MPC_to_LMP	Slc29a1	FALSE	0	0	76.8118	5.21986	NA	NA	NA	NA	NA	NA	NA	NA	NA
MPC	MPC_to_LMP	Entpd3	FALSE	0	0	75.5599	-5.34802	NA	NA	NA	NA	NA	NA	NA	NA	NA
MPC	MPC_to_LMP	Set	FALSE	0	0	74.0545	3.32318	NA	NA	NA	NA	NA	NA	NA	NA	NA
MPC	MPC_to_LMP	Col5a2	FALSE	0	0	72.4225	-2.12137	NA	NA	NA	NA	NA	NA	NA	NA	NA
MPC	MPC_to_LMP	Pa2g4	FALSE	2.22e-16	3.46e-13	67.294	3.93142	NA	NA	NA	NA	NA	NA	NA	NA	NA
MPC	MPC_to_LMP	Cnbp	FALSE	4.44e-16	6.06e-13	66.0116	2.88722	NA	NA	NA	NA	NA	NA	NA	NA	NA
MPC	MPC_to_LMP	Bglap2	FALSE	4.44e-16	6.06e-13	65.8731	-4.42841	NA	NA	NA	NA	NA	NA	NA	NA	NA
MPC	MPC_to_LMP	Sparc	FALSE	1.11e-15	1.35e-12	64.2557	-1.93539	NA	NA	NA	NA	NA	NA	NA	NA	NA
MPC	MPC_to_LMP	Hsp90ab1	FALSE	1.11e-15	1.35e-12	64.2287	2.17416	NA	NA	NA	NA	NA	NA	NA	NA	NA
MPC	MPC_to_LMP	Bax	FALSE	1.55e-15	1.79e-12	63.5327	2.88547	NA	NA	NA	NA	NA	NA	NA	NA	NA
MPC	MPC_to_LMP	Hnrnpf	FALSE	2.11e-15	2.3e-12	62.9731	2.65159	NA	NA	NA	NA	NA	NA	NA	NA	NA
MPC	MPC_to_LMP	S100a6	FALSE	3.66e-15	3.81e-12	61.888	2.97374	NA	NA	NA	NA	NA	NA	NA	NA	NA
MPC	MPC_to_LMP	Rsl1d1	FALSE	7.55e-15	7.49e-12	60.4591	3.61564	NA	NA	NA	NA	NA	NA	NA	NA	NA
MPC	MPC_to_LMP	Aprt	FALSE	2.05e-14	1.95e-11	58.483	2.72439	NA	NA	NA	NA	NA	NA	NA	NA	NA
MPC	MPC_to_LMP	Serbp1	FALSE	2.5e-14	2.27e-11	58.0968	2.26315	NA	NA	NA	NA	NA	NA	NA	NA	NA
MPC	MPC_to_LMP	Aebp1	FALSE	3.35e-14	2.93e-11	57.5125	4.45167	NA	NA	NA	NA	NA	NA	NA	NA	NA
MPC	MPC_to_LMP	Cct5	FALSE	4.24e-14	3.56e-11	57.0534	2.53579	NA	NA	NA	NA	NA	NA	NA	NA	NA
MPC	MPC_to_LMP	Loxl2	FALSE	4.44e-14	3.59e-11	56.9641	-3.04363	NA	NA	NA	NA	NA	NA	NA	NA	NA
MPC	MPC_to_LMP	Npm3	FALSE	5.21e-14	4.06e-11	56.6506	4.38629	NA	NA	NA	NA	NA	NA	NA	NA	NA
MPC	MPC_to_LMP	Ran	FALSE	8.38e-14	6.31e-11	55.7134	2.51607	NA	NA	NA	NA	NA	NA	NA	NA	NA
MPC	MPC_to_LMP	Prmt1	FALSE	9.05e-14	6.58e-11	55.5628	3.45833	NA	NA	NA	NA	NA	NA	NA	NA	NA
MPC	MPC_to_LMP	Nradd	FALSE	1.27e-13	8.95e-11	54.895	5.43246	NA	NA	NA	NA	NA	NA	NA	NA	NA
MPC	MPC_to_LMP	Cct4	FALSE	2.4e-13	1.59e-10	53.6467	2.652	NA	NA	NA	NA	NA	NA	NA	NA	NA
MPC	MPC_to_LMP	Hdgf	FALSE	2.41e-13	1.59e-10	53.641	3.02215	NA	NA	NA	NA	NA	NA	NA	NA	NA
MPC	MPC_to_LMP	Vim	FALSE	2.75e-13	1.73e-10	53.3826	2.42759	NA	NA	NA	NA	NA	NA	NA	NA	NA
MPC	MPC_to_LMP	Nop56	FALSE	2.77e-13	1.73e-10	53.3657	4.49046	NA	NA	NA	NA	NA	NA	NA	NA	NA
MPC	MPC_to_LMP	Rps27l	FALSE	3.13e-13	1.9e-10	53.1262	1.83475	NA	NA	NA	NA	NA	NA	NA	NA	NA
MPC	MPC_to_LMP	Lgals1	FALSE	3.38e-13	1.99e-10	52.9746	2.05221	NA	NA	NA	NA	NA	NA	NA	NA	NA
MPC	MPC_to_LMP	Spp1	FALSE	3.78e-13	2.17e-10	52.7517	2.77891	NA	NA	NA	NA	NA	NA	NA	NA	NA
MPC	MPC_to_LMP	Hspd1	FALSE	4.13e-13	2.31e-10	52.5822	3.16943	NA	NA	NA	NA	NA	NA	NA	NA	NA
MPC	MPC_to_LMP	Tnfrsf12a	FALSE	6.66e-13	3.63e-10	51.6428	4.50917	NA	NA	NA	NA	NA	NA	NA	NA	NA
MPC	MPC_to_LMP	Cct3	FALSE	1.37e-12	7.31e-10	50.2227	2.90248	NA	NA	NA	NA	NA	NA	NA	NA	NA
MPC	MPC_to_LMP	Esd	FALSE	1.43e-12	7.42e-10	50.145	2.50294	NA	NA	NA	NA	NA	NA	NA	NA	NA
MPC	MPC_to_LMP	Ptges3	FALSE	2.33e-12	1.18e-09	49.1826	2.77036	NA	NA	NA	NA	NA	NA	NA	NA	NA
MPC	MPC_to_LMP	Eif6	FALSE	2.56e-12	1.27e-09	48.9982	2.91922	NA	NA	NA	NA	NA	NA	NA	NA	NA
MPC	MPC_to_LMP	Cmtm3	FALSE	2.83e-12	1.37e-09	48.8061	7.17593	NA	NA	NA	NA	NA	NA	NA	NA	NA
MPC	MPC_to_LMP	C1qbp	FALSE	3.17e-12	1.51e-09	48.5779	2.83957	NA	NA	NA	NA	NA	NA	NA	NA	NA
MPC	MPC_to_LMP	Nudt4	FALSE	3.52e-12	1.6e-09	48.3773	3.76876	NA	NA	NA	NA	NA	NA	NA	NA	NA
MPC	MPC_to_LMP	Cct8	FALSE	3.52e-12	1.6e-09	48.3726	2.44527	NA	NA	NA	NA	NA	NA	NA	NA	NA
MPC	MPC_to_LMP	Apoe	FALSE	3.92e-12	1.75e-09	48.1646	-3.5572	NA	NA	NA	NA	NA	NA	NA	NA	NA
MPC	MPC_to_LMP	Cgref1	FALSE	5.42e-12	2.37e-09	47.5287	-2.63335	NA	NA	NA	NA	NA	NA	NA	NA	NA
MPC	MPC_to_LMP	Trp53	FALSE	6.02e-12	2.58e-09	47.3231	4.14259	NA	NA	NA	NA	NA	NA	NA	NA	NA
MPC	MPC_to_LMP	Mgp	FALSE	1.5e-11	6.3e-09	45.5342	5.20739	NA	NA	NA	NA	NA	NA	NA	NA	NA
MPC	MPC_to_LMP	U2af1	FALSE	1.9e-11	7.83e-09	45.0711	2.72869	NA	NA	NA	NA	NA	NA	NA	NA	NA
MPC	MPC_to_LMP	Rgs5	FALSE	2.03e-11	8.22e-09	44.9392	-7.79353	NA	NA	NA	NA	NA	NA	NA	NA	NA
MPC	MPC_to_LMP	Txn1	FALSE	2.08e-11	8.24e-09	44.8977	2.16804	NA	NA	NA	NA	NA	NA	NA	NA	NA
MPC	MPC_to_LMP	Eif3d	FALSE	2.38e-11	9.29e-09	44.6285	2.6269	NA	NA	NA	NA	NA	NA	NA	NA	NA
MPC	MPC_to_LMP	Bglap3	FALSE	2.65e-11	1.01e-08	44.4208	-3.64485	NA	NA	NA	NA	NA	NA	NA	NA	NA
MPC	MPC_to_LMP	Fbl	FALSE	6.49e-11	2.44e-08	42.6661	3.28635	NA	NA	NA	NA	NA	NA	NA	NA	NA
MPC	MPC_to_LMP	Snrpd1	FALSE	6.89e-11	2.55e-08	42.5506	2.76824	NA	NA	NA	NA	NA	NA	NA	NA	NA
MPC	MPC_to_LMP	Prrx2	FALSE	7.13e-11	2.6e-08	42.482	5.32995	NA	NA	NA	NA	NA	NA	NA	NA	NA
MPC	MPC_to_LMP	Timm10	FALSE	9.22e-11	3.3e-08	41.981	4.57614	NA	NA	NA	NA	NA	NA	NA	NA	NA
MPC	MPC_to_LMP	Rcn3	FALSE	9.64e-11	3.39e-08	41.8931	-1.85411	NA	NA	NA	NA	NA	NA	NA	NA	NA
MPC	MPC_to_LMP	Eif5a	FALSE	1.12e-10	3.9e-08	41.5925	1.85137	NA	NA	NA	NA	NA	NA	NA	NA	NA
MPC	MPC_to_LMP	Timp2	FALSE	1.31e-10	4.48e-08	41.2887	2.27394	NA	NA	NA	NA	NA	NA	NA	NA	NA
MPC	MPC_to_LMP	Naca	FALSE	1.74e-10	5.83e-08	40.7443	1.53718	NA	NA	NA	NA	NA	NA	NA	NA	NA
MPC	MPC_to_LMP	Irx3	FALSE	1.8e-10	5.95e-08	40.6731	4.01308	NA	NA	NA	NA	NA	NA	NA	NA	NA
MPC	MPC_to_LMP	Cacybp	FALSE	1.92e-10	6.25e-08	40.5482	3.17938	NA	NA	NA	NA	NA	NA	NA	NA	NA
MPC	MPC_to_LMP	Serpinb6a	FALSE	2.22e-10	7.07e-08	40.2651	2.70474	NA	NA	NA	NA	NA	NA	NA	NA	NA
MPC	MPC_to_LMP	Apex1	FALSE	2.24e-10	7.07e-08	40.2493	3.58281	NA	NA	NA	NA	NA	NA	NA	NA	NA
MPC	MPC_to_LMP	Mrpl21	FALSE	2.64e-10	8.24e-08	39.9225	2.93714	NA	NA	NA	NA	NA	NA	NA	NA	NA
MPC	MPC_to_LMP	Ptma	FALSE	2.72e-10	8.36e-08	39.867	1.71727	NA	NA	NA	NA	NA	NA	NA	NA	NA
MPC	MPC_to_LMP	Lyz2	FALSE	2.9e-10	8.74e-08	39.7388	-3.80633	NA	NA	NA	NA	NA	NA	NA	NA	NA
MPC	MPC_to_LMP	Anp32b	FALSE	2.92e-10	8.74e-08	39.7249	2.25505	NA	NA	NA	NA	NA	NA	NA	NA	NA
MPC	MPC_to_LMP	Lmna	FALSE	3.43e-10	9.99e-08	39.4158	2.08463	NA	NA	NA	NA	NA	NA	NA	NA	NA
MPC	MPC_to_LMP	Glrx3	FALSE	3.43e-10	9.99e-08	39.4123	2.43202	NA	NA	NA	NA	NA	NA	NA	NA	NA
MPC	MPC_to_LMP	Pdgfrl	FALSE	3.63e-10	1.04e-07	39.2997	-3.34199	NA	NA	NA	NA	NA	NA	NA	NA	NA
MPC	MPC_to_LMP	Llph	FALSE	4.01e-10	1.14e-07	39.1088	2.85944	NA	NA	NA	NA	NA	NA	NA	NA	NA
MPC	MPC_to_LMP	Fkbp7	FALSE	4.61e-10	1.29e-07	38.835	-2.05249	NA	NA	NA	NA	NA	NA	NA	NA	NA
MPC	MPC_to_LMP	Mfsd10	FALSE	4.72e-10	1.3e-07	38.7893	4.32039	NA	NA	NA	NA	NA	NA	NA	NA	NA
MPC	MPC_to_LMP	Tomm5	FALSE	5.01e-10	1.37e-07	38.6737	2.38426	NA	NA	NA	NA	NA	NA	NA	NA	NA
MPC	MPC_to_LMP	Nt5c	FALSE	5.22e-10	1.41e-07	38.5925	3.19392	NA	NA	NA	NA	NA	NA	NA	NA	NA
MPC	MPC_to_LMP	Eif3g	FALSE	6.06e-10	1.61e-07	38.3009	2.58302	NA	NA	NA	NA	NA	NA	NA	NA	NA
MPC	MPC_to_LMP	Rps15	FALSE	6.86e-10	1.8e-07	38.0609	1.36497	NA	NA	NA	NA	NA	NA	NA	NA	NA
MPC	MPC_to_LMP	P4ha1	FALSE	7.19e-10	1.87e-07	37.9689	-2.24223	NA	NA	NA	NA	NA	NA	NA	NA	NA
MPC	MPC_to_LMP	Phb2	FALSE	8.49e-10	2.18e-07	37.6433	2.42502	NA	NA	NA	NA	NA	NA	NA	NA	NA
MPC	MPC_to_LMP	Sssca1	FALSE	9.44e-10	2.4e-07	37.4377	3.59016	NA	NA	NA	NA	NA	NA	NA	NA	NA
MPC	MPC_to_LMP	Ak2	FALSE	1.09e-09	2.73e-07	37.1614	3.34221	NA	NA	NA	NA	NA	NA	NA	NA	NA
MPC	MPC_to_LMP	Snrpe	FALSE	1.14e-09	2.83e-07	37.0667	2.00174	NA	NA	NA	NA	NA	NA	NA	NA	NA
MPC	MPC_to_LMP	Mrps18b	FALSE	1.34e-09	3.29e-07	36.754	3.52751	NA	NA	NA	NA	NA	NA	NA	NA	NA
MPC	MPC_to_LMP	Impdh2	FALSE	1.43e-09	3.48e-07	36.6237	2.8951	NA	NA	NA	NA	NA	NA	NA	NA	NA
MPC	MPC_to_LMP	Sae1	FALSE	1.49e-09	3.58e-07	36.5448	3.78402	NA	NA	NA	NA	NA	NA	NA	NA	NA
MPC	MPC_to_LMP	Gtpbp4	FALSE	1.54e-09	3.66e-07	36.4787	3.46098	NA	NA	NA	NA	NA	NA	NA	NA	NA
MPC	MPC_to_LMP	Hspa9	FALSE	1.84e-09	4.32e-07	36.1361	2.42382	NA	NA	NA	NA	NA	NA	NA	NA	NA
MPC	MPC_to_LMP	Rtn4	FALSE	1.86e-09	4.32e-07	36.1142	2.64004	NA	NA	NA	NA	NA	NA	NA	NA	NA
MPC	MPC_to_LMP	Ybx3	FALSE	1.97e-09	4.54e-07	35.9984	2.46329	NA	NA	NA	NA	NA	NA	NA	NA	NA
MPC	MPC_to_LMP	Rbms1	FALSE	2.06e-09	4.69e-07	35.9123	3.15978	NA	NA	NA	NA	NA	NA	NA	NA	NA
MPC	MPC_to_LMP	Csf1	FALSE	2.26e-09	5.09e-07	35.7326	3.50646	NA	NA	NA	NA	NA	NA	NA	NA	NA
MPC	MPC_to_LMP	Hsd17b10	FALSE	2.38e-09	5.29e-07	35.6384	3.08611	NA	NA	NA	NA	NA	NA	NA	NA	NA
MPC	MPC_to_LMP	Mrpl15	FALSE	2.46e-09	5.42e-07	35.5714	3.17925	NA	NA	NA	NA	NA	NA	NA	NA	NA
MPC	MPC_to_LMP	Snu13	FALSE	2.56e-09	5.58e-07	35.4957	2.24543	NA	NA	NA	NA	NA	NA	NA	NA	NA
MPC	MPC_to_LMP	Lipc	FALSE	2.71e-09	5.85e-07	35.3843	-4.22341	NA	NA	NA	NA	NA	NA	NA	NA	NA
MPC	MPC_to_LMP	Higd1a	FALSE	3.32e-09	7.12e-07	34.984	-1.96118	NA	NA	NA	NA	NA	NA	NA	NA	NA
MPC	MPC_to_LMP	Ercc1	FALSE	3.48e-09	7.37e-07	34.8965	3.56558	NA	NA	NA	NA	NA	NA	NA	NA	NA
MPC	MPC_to_LMP	H2afj	FALSE	3.73e-09	7.76e-07	34.7624	2.02088	NA	NA	NA	NA	NA	NA	NA	NA	NA
MPC	MPC_to_LMP	Plekhj1	FALSE	3.74e-09	7.76e-07	34.7553	3.78106	NA	NA	NA	NA	NA	NA	NA	NA	NA
MPC	MPC_to_LMP	Rrp15	FALSE	3.77e-09	7.76e-07	34.7393	4.08381	NA	NA	NA	NA	NA	NA	NA	NA	NA
MPC	MPC_to_LMP	Npm1	FALSE	3.85e-09	7.85e-07	34.7005	1.69228	NA	NA	NA	NA	NA	NA	NA	NA	NA
MPC	MPC_to_LMP	Ddx27	FALSE	3.91e-09	7.9e-07	34.6696	4.33835	NA	NA	NA	NA	NA	NA	NA	NA	NA
MPC	MPC_to_LMP	Lsm7	FALSE	4.38e-09	8.65e-07	34.4449	2.72449	NA	NA	NA	NA	NA	NA	NA	NA	NA
MPC	MPC_to_LMP	Ahnak	FALSE	4.4e-09	8.65e-07	34.4391	2.39113	NA	NA	NA	NA	NA	NA	NA	NA	NA
MPC	MPC_to_LMP	Nop58	FALSE	4.4e-09	8.65e-07	34.4385	2.86418	NA	NA	NA	NA	NA	NA	NA	NA	NA
MPC	MPC_to_LMP	Marcks	FALSE	4.63e-09	9.02e-07	34.34	2.39059	NA	NA	NA	NA	NA	NA	NA	NA	NA
MPC	MPC_to_LMP	1700003F12Rik	FALSE	5.38e-09	1.04e-06	34.0476	-3.37191	NA	NA	NA	NA	NA	NA	NA	NA	NA
MPC	MPC_to_LMP	Bola2	FALSE	5.56e-09	1.07e-06	33.9814	2.23706	NA	NA	NA	NA	NA	NA	NA	NA	NA
MPC	MPC_to_LMP	Chchd10	FALSE	5.92e-09	1.12e-06	33.8616	11.5308	NA	NA	NA	NA	NA	NA	NA	NA	NA
MPC	MPC_to_LMP	Cnih4	FALSE	5.98e-09	1.13e-06	33.8398	2.7678	NA	NA	NA	NA	NA	NA	NA	NA	NA
MPC	MPC_to_LMP	Csrp2	FALSE	6.09e-09	1.13e-06	33.8047	3.40818	NA	NA	NA	NA	NA	NA	NA	NA	NA
MPC	MPC_to_LMP	Cdc37	FALSE	6.11e-09	1.13e-06	33.7988	2.19169	NA	NA	NA	NA	NA	NA	NA	NA	NA
MPC	MPC_to_LMP	Serpinh1	FALSE	6.25e-09	1.15e-06	33.7551	-1.44512	NA	NA	NA	NA	NA	NA	NA	NA	NA
MPC	MPC_to_LMP	Rac3	FALSE	6.58e-09	1.2e-06	33.6566	5.66155	NA	NA	NA	NA	NA	NA	NA	NA	NA
MPC	MPC_to_LMP	Cthrc1	FALSE	7.19e-09	1.3e-06	33.4819	-2.55427	NA	NA	NA	NA	NA	NA	NA	NA	NA
MPC	MPC_to_LMP	Csnk2a2	FALSE	7.77e-09	1.39e-06	33.3312	3.51496	NA	NA	NA	NA	NA	NA	NA	NA	NA
MPC	MPC_to_LMP	Anxa1	FALSE	8.17e-09	1.45e-06	33.2354	2.58878	NA	NA	NA	NA	NA	NA	NA	NA	NA
MPC	MPC_to_LMP	Cox5a	FALSE	8.34e-09	1.47e-06	33.1939	1.66707	NA	NA	NA	NA	NA	NA	NA	NA	NA
MPC	MPC_to_LMP	Sco2	FALSE	8.45e-09	1.47e-06	33.1679	4.89787	NA	NA	NA	NA	NA	NA	NA	NA	NA
MPC	MPC_to_LMP	Nap1l1	FALSE	8.48e-09	1.47e-06	33.1625	2.35949	NA	NA	NA	NA	NA	NA	NA	NA	NA
MPC	MPC_to_LMP	Mtdh	FALSE	8.73e-09	1.5e-06	33.1053	2.22715	NA	NA	NA	NA	NA	NA	NA	NA	NA
MPC	MPC_to_LMP	Fkbp10	FALSE	9.54e-09	1.63e-06	32.9337	-1.67452	NA	NA	NA	NA	NA	NA	NA	NA	NA
MPC	MPC_to_LMP	Clic1	FALSE	1e-08	1.7e-06	32.8339	2.34127	NA	NA	NA	NA	NA	NA	NA	NA	NA
MPC	MPC_to_LMP	Tcf4	FALSE	1.01e-08	1.7e-06	32.82	2.9358	NA	NA	NA	NA	NA	NA	NA	NA	NA
MPC	MPC_to_LMP	Lyar	FALSE	1.12e-08	1.86e-06	32.6233	3.88348	NA	NA	NA	NA	NA	NA	NA	NA	NA
MPC	MPC_to_LMP	Eif3a	FALSE	1.22e-08	2.01e-06	32.4584	2.16957	NA	NA	NA	NA	NA	NA	NA	NA	NA
MPC	MPC_to_LMP	Sugt1	FALSE	1.24e-08	2.03e-06	32.4246	2.6728	NA	NA	NA	NA	NA	NA	NA	NA	NA
MPC	MPC_to_LMP	Ogn	FALSE	1.38e-08	2.24e-06	32.22	3.44501	NA	NA	NA	NA	NA	NA	NA	NA	NA
MPC	MPC_to_LMP	Hnrnpk	FALSE	1.39e-08	2.24e-06	32.2078	1.54058	NA	NA	NA	NA	NA	NA	NA	NA	NA
MPC	MPC_to_LMP	Nhp2	FALSE	1.42e-08	2.27e-06	32.1552	2.48565	NA	NA	NA	NA	NA	NA	NA	NA	NA
MPC	MPC_to_LMP	Eif2s1	FALSE	1.43e-08	2.27e-06	32.1524	2.72113	NA	NA	NA	NA	NA	NA	NA	NA	NA
MPC	MPC_to_LMP	Bin1	FALSE	1.53e-08	2.43e-06	32.0092	2.92818	NA	NA	NA	NA	NA	NA	NA	NA	NA
MPC	MPC_to_LMP	Txn2	FALSE	1.55e-08	2.44e-06	31.9837	2.4147	NA	NA	NA	NA	NA	NA	NA	NA	NA
MPC	MPC_to_LMP	Tnc	FALSE	1.7e-08	2.65e-06	31.8093	2.92786	NA	NA	NA	NA	NA	NA	NA	NA	NA
MPC	MPC_to_LMP	Tspan4	FALSE	1.8e-08	2.79e-06	31.6972	2.27202	NA	NA	NA	NA	NA	NA	NA	NA	NA
MPC	MPC_to_LMP	Pmepa1	FALSE	1.9e-08	2.9e-06	31.5967	2.56209	NA	NA	NA	NA	NA	NA	NA	NA	NA
MPC	MPC_to_LMP	Ank	FALSE	1.9e-08	2.9e-06	31.5939	5.75728	NA	NA	NA	NA	NA	NA	NA	NA	NA
MPC	MPC_to_LMP	Fyn	FALSE	2.01e-08	3.04e-06	31.4873	-2.6515	NA	NA	NA	NA	NA	NA	NA	NA	NA
MPC	MPC_to_LMP	Snhg18	FALSE	2.14e-08	3.22e-06	31.3656	-1.83108	NA	NA	NA	NA	NA	NA	NA	NA	NA
MPC	MPC_to_LMP	Ndufab1	FALSE	2.17e-08	3.24e-06	31.3371	1.93987	NA	NA	NA	NA	NA	NA	NA	NA	NA
MPC	MPC_to_LMP	Uqcrc1	FALSE	2.2e-08	3.26e-06	31.3131	2.42312	NA	NA	NA	NA	NA	NA	NA	NA	NA
MPC	MPC_to_LMP	Ybx1	FALSE	2.23e-08	3.29e-06	31.281	1.50193	NA	NA	NA	NA	NA	NA	NA	NA	NA
MPC	MPC_to_LMP	Ccnd2	FALSE	2.35e-08	3.44e-06	31.1825	2.75462	NA	NA	NA	NA	NA	NA	NA	NA	NA
MPC	MPC_to_LMP	Eif4e	FALSE	2.37e-08	3.44e-06	31.1688	2.47441	NA	NA	NA	NA	NA	NA	NA	NA	NA
MPC	MPC_to_LMP	Rpl17	FALSE	2.6e-08	3.76e-06	30.9843	1.37444	NA	NA	NA	NA	NA	NA	NA	NA	NA
MPC	MPC_to_LMP	Ifitm3	FALSE	2.77e-08	3.98e-06	30.8607	2.06519	NA	NA	NA	NA	NA	NA	NA	NA	NA
MPC	MPC_to_LMP	Hsp90aa1	FALSE	2.86e-08	4.08e-06	30.7985	1.75494	NA	NA	NA	NA	NA	NA	NA	NA	NA
MPC	MPC_to_LMP	Eif4a1	FALSE	3.17e-08	4.49e-06	30.6032	1.49983	NA	NA	NA	NA	NA	NA	NA	NA	NA
MPC	MPC_to_LMP	Fcf1	FALSE	3.2e-08	4.51e-06	30.5808	2.92618	NA	NA	NA	NA	NA	NA	NA	NA	NA
MPC	MPC_to_LMP	Rpl18	FALSE	3.29e-08	4.61e-06	30.5265	1.27931	NA	NA	NA	NA	NA	NA	NA	NA	NA
MPC	MPC_to_LMP	Ywhae	FALSE	3.41e-08	4.74e-06	30.461	1.7023	NA	NA	NA	NA	NA	NA	NA	NA	NA
MPC	MPC_to_LMP	Eif3e	FALSE	3.57e-08	4.88e-06	30.3721	1.68724	NA	NA	NA	NA	NA	NA	NA	NA	NA
MPC	MPC_to_LMP	Tns3	FALSE	3.57e-08	4.88e-06	30.369	3.20093	NA	NA	NA	NA	NA	NA	NA	NA	NA
MPC	MPC_to_LMP	Ppia	FALSE	3.58e-08	4.88e-06	30.3655	1.33902	NA	NA	NA	NA	NA	NA	NA	NA	NA
MPC	MPC_to_LMP	P4hb	FALSE	3.79e-08	5.14e-06	30.2535	-1.57611	NA	NA	NA	NA	NA	NA	NA	NA	NA
MPC	MPC_to_LMP	Atp6v1g1	FALSE	4.16e-08	5.56e-06	30.0746	1.63355	NA	NA	NA	NA	NA	NA	NA	NA	NA
MPC	MPC_to_LMP	Mepe	FALSE	4.16e-08	5.56e-06	30.0746	-4.72051	NA	NA	NA	NA	NA	NA	NA	NA	NA
MPC	MPC_to_LMP	Cd1d1	FALSE	4.18e-08	5.56e-06	30.0663	-3.0588	NA	NA	NA	NA	NA	NA	NA	NA	NA
MPC	MPC_to_LMP	Eif3m	FALSE	4.32e-08	5.72e-06	30.0002	1.86709	NA	NA	NA	NA	NA	NA	NA	NA	NA
MPC	MPC_to_LMP	Atic	FALSE	4.51e-08	5.94e-06	29.9148	3.7005	NA	NA	NA	NA	NA	NA	NA	NA	NA
MPC	MPC_to_LMP	Dnajc2	FALSE	4.65e-08	6.08e-06	29.8563	4.01557	NA	NA	NA	NA	NA	NA	NA	NA	NA
MPC	MPC_to_LMP	Pfdn2	FALSE	4.71e-08	6.12e-06	29.8338	2.24491	NA	NA	NA	NA	NA	NA	NA	NA	NA
MPC	MPC_to_LMP	Atpif1	FALSE	4.76e-08	6.13e-06	29.8131	1.63664	NA	NA	NA	NA	NA	NA	NA	NA	NA
MPC	MPC_to_LMP	Lmcd1	FALSE	4.77e-08	6.13e-06	29.808	6.74594	NA	NA	NA	NA	NA	NA	NA	NA	NA
MPC	MPC_to_LMP	Cald1	FALSE	5.02e-08	6.41e-06	29.7098	1.87478	NA	NA	NA	NA	NA	NA	NA	NA	NA
MPC	MPC_to_LMP	Rps8	FALSE	5.14e-08	6.52e-06	29.6631	1.22587	NA	NA	NA	NA	NA	NA	NA	NA	NA
MPC	MPC_to_LMP	Maf	FALSE	5.5e-08	6.95e-06	29.5304	3.67706	NA	NA	NA	NA	NA	NA	NA	NA	NA
MPC	MPC_to_LMP	Sema3b	FALSE	5.66e-08	7.1e-06	29.4771	-3.84588	NA	NA	NA	NA	NA	NA	NA	NA	NA
MPC	MPC_to_LMP	Ubxn1	FALSE	5.75e-08	7.17e-06	29.4467	2.20373	NA	NA	NA	NA	NA	NA	NA	NA	NA
MPC	MPC_to_LMP	Selenow	FALSE	5.91e-08	7.33e-06	29.3918	2.17825	NA	NA	NA	NA	NA	NA	NA	NA	NA
MPC	MPC_to_LMP	Polr2f	FALSE	6.18e-08	7.62e-06	29.3059	2.05268	NA	NA	NA	NA	NA	NA	NA	NA	NA
MPC	MPC_to_LMP	Ndufa4	FALSE	6.43e-08	7.88e-06	29.2307	1.92339	NA	NA	NA	NA	NA	NA	NA	NA	NA
MPC	MPC_to_LMP	Timp1	FALSE	6.52e-08	7.95e-06	29.2018	1.92545	NA	NA	NA	NA	NA	NA	NA	NA	NA
MPC	MPC_to_LMP	Sfxn1	FALSE	6.59e-08	8e-06	29.1807	2.82519	NA	NA	NA	NA	NA	NA	NA	NA	NA
MPC	MPC_to_LMP	Mrto4	FALSE	7.03e-08	8.48e-06	29.0555	3.13936	NA	NA	NA	NA	NA	NA	NA	NA	NA
MPC	MPC_to_LMP	Ramp1	FALSE	7.1e-08	8.52e-06	29.0371	-1.93878	NA	NA	NA	NA	NA	NA	NA	NA	NA
MPC	MPC_to_LMP	Snrpd3	FALSE	7.68e-08	9.16e-06	28.8859	2.17429	NA	NA	NA	NA	NA	NA	NA	NA	NA
MPC	MPC_to_LMP	Gnb4	FALSE	7.79e-08	9.25e-06	28.8569	7.95151	NA	NA	NA	NA	NA	NA	NA	NA	NA
MPC	MPC_to_LMP	Srpx	FALSE	7.94e-08	9.34e-06	28.8217	-2.77282	NA	NA	NA	NA	NA	NA	NA	NA	NA
MPC	MPC_to_LMP	Tomm20	FALSE	7.96e-08	9.34e-06	28.8159	1.60513	NA	NA	NA	NA	NA	NA	NA	NA	NA
MPC	MPC_to_LMP	Sntb2	FALSE	8.32e-08	9.71e-06	28.7299	5.9389	NA	NA	NA	NA	NA	NA	NA	NA	NA
MPC	MPC_to_LMP	H2afy	FALSE	8.45e-08	9.81e-06	28.7011	2.9407	NA	NA	NA	NA	NA	NA	NA	NA	NA
MPC	MPC_to_LMP	Denr	FALSE	9.21e-08	1.06e-05	28.5327	2.4134	NA	NA	NA	NA	NA	NA	NA	NA	NA
MPC	MPC_to_LMP	Rpsa	FALSE	9.38e-08	1.08e-05	28.4974	1.21992	NA	NA	NA	NA	NA	NA	NA	NA	NA
MPC	MPC_to_LMP	Mrpl22	FALSE	9.72e-08	1.11e-05	28.4294	4.17859	NA	NA	NA	NA	NA	NA	NA	NA	NA
MPC	MPC_to_LMP	Hmga2	FALSE	9.76e-08	1.11e-05	28.4208	9.28844	NA	NA	NA	NA	NA	NA	NA	NA	NA
MPC	MPC_to_LMP	Prkar1a	FALSE	9.95e-08	1.13e-05	28.3828	1.88545	NA	NA	NA	NA	NA	NA	NA	NA	NA
MPC	MPC_to_LMP	Ppp1r14b	FALSE	1.14e-07	1.29e-05	28.1164	1.96816	NA	NA	NA	NA	NA	NA	NA	NA	NA
MPC	MPC_to_LMP	Ppid	FALSE	1.15e-07	1.29e-05	28.1	3.26896	NA	NA	NA	NA	NA	NA	NA	NA	NA
MPC	MPC_to_LMP	Siva1	FALSE	1.28e-07	1.43e-05	27.8921	2.51326	NA	NA	NA	NA	NA	NA	NA	NA	NA
MPC	MPC_to_LMP	Ap3s1	FALSE	1.32e-07	1.46e-05	27.8374	2.14075	NA	NA	NA	NA	NA	NA	NA	NA	NA
MPC	MPC_to_LMP	Mtap	FALSE	1.33e-07	1.46e-05	27.8274	4.01566	NA	NA	NA	NA	NA	NA	NA	NA	NA
MPC	MPC_to_LMP	Ccng1	FALSE	1.34e-07	1.47e-05	27.8071	2.78784	NA	NA	NA	NA	NA	NA	NA	NA	NA
MPC	MPC_to_LMP	Wdr43	FALSE	1.34e-07	1.47e-05	27.8005	3.29028	NA	NA	NA	NA	NA	NA	NA	NA	NA
MPC	MPC_to_LMP	Epb41l4aos	FALSE	1.39e-07	1.51e-05	27.7419	3.66256	NA	NA	NA	NA	NA	NA	NA	NA	NA
MPC	MPC_to_LMP	Mrpl12	FALSE	1.41e-07	1.53e-05	27.7034	2.40775	NA	NA	NA	NA	NA	NA	NA	NA	NA
MPC	MPC_to_LMP	Irs1	FALSE	1.42e-07	1.53e-05	27.6944	3.25781	NA	NA	NA	NA	NA	NA	NA	NA	NA
MPC	MPC_to_LMP	Rpl23a	FALSE	1.49e-07	1.59e-05	27.6043	1.25663	NA	NA	NA	NA	NA	NA	NA	NA	NA
MPC	MPC_to_LMP	G3bp1	FALSE	1.51e-07	1.61e-05	27.5769	2.33274	NA	NA	NA	NA	NA	NA	NA	NA	NA
MPC	MPC_to_LMP	Rnf187	FALSE	1.69e-07	1.79e-05	27.3575	2.36798	NA	NA	NA	NA	NA	NA	NA	NA	NA
MPC	MPC_to_LMP	Zfp622	FALSE	1.77e-07	1.86e-05	27.2737	3.20768	NA	NA	NA	NA	NA	NA	NA	NA	NA
MPC	MPC_to_LMP	Fstl1	FALSE	1.78e-07	1.87e-05	27.2578	2.99784	NA	NA	NA	NA	NA	NA	NA	NA	NA
MPC	MPC_to_LMP	Dynap	FALSE	1.82e-07	1.9e-05	27.2136	16.0559	NA	NA	NA	NA	NA	NA	NA	NA	NA
MPC	MPC_to_LMP	Polr2m	FALSE	1.82e-07	1.9e-05	27.2105	2.21359	NA	NA	NA	NA	NA	NA	NA	NA	NA
MPC	MPC_to_LMP	Mybbp1a	FALSE	1.85e-07	1.91e-05	27.1852	3.26967	NA	NA	NA	NA	NA	NA	NA	NA	NA
MPC	MPC_to_LMP	Spry1	FALSE	1.88e-07	1.93e-05	27.1516	4.41802	NA	NA	NA	NA	NA	NA	NA	NA	NA
MPC	MPC_to_LMP	Cdk4	FALSE	1.89e-07	1.93e-05	27.1405	2.09211	NA	NA	NA	NA	NA	NA	NA	NA	NA
MPC	MPC_to_LMP	Plec	FALSE	1.9e-07	1.93e-05	27.1347	2.90932	NA	NA	NA	NA	NA	NA	NA	NA	NA
MPC	MPC_to_LMP	Pfdn6	FALSE	1.9e-07	1.93e-05	27.1325	2.56841	NA	NA	NA	NA	NA	NA	NA	NA	NA
MPC	MPC_to_LMP	Rps10	FALSE	1.96e-07	1.98e-05	27.0756	1.2769	NA	NA	NA	NA	NA	NA	NA	NA	NA
MPC	MPC_to_LMP	Emg1	FALSE	2.05e-07	2.06e-05	26.9866	2.34845	NA	NA	NA	NA	NA	NA	NA	NA	NA
MPC	MPC_to_LMP	Rpl22	FALSE	2.09e-07	2.09e-05	26.9492	1.30435	NA	NA	NA	NA	NA	NA	NA	NA	NA
MPC	MPC_to_LMP	Clns1a	FALSE	2.2e-07	2.19e-05	26.8473	2.62547	NA	NA	NA	NA	NA	NA	NA	NA	NA
MPC	MPC_to_LMP	Tagln2	FALSE	2.2e-07	2.19e-05	26.8457	3.07761	NA	NA	NA	NA	NA	NA	NA	NA	NA
MPC	MPC_to_LMP	Rars	FALSE	2.31e-07	2.27e-05	26.7579	2.711	NA	NA	NA	NA	NA	NA	NA	NA	NA
MPC	MPC_to_LMP	Tnpo1	FALSE	2.31e-07	2.27e-05	26.7545	3.07392	NA	NA	NA	NA	NA	NA	NA	NA	NA
MPC	MPC_to_LMP	Pdgfa	FALSE	2.32e-07	2.27e-05	26.7494	2.54603	NA	NA	NA	NA	NA	NA	NA	NA	NA
MPC	MPC_to_LMP	Nmd3	FALSE	2.37e-07	2.31e-05	26.7075	4.13535	NA	NA	NA	NA	NA	NA	NA	NA	NA
MPC	MPC_to_LMP	Ddx18	FALSE	2.41e-07	2.34e-05	26.6721	3.27188	NA	NA	NA	NA	NA	NA	NA	NA	NA
MPC	MPC_to_LMP	St13	FALSE	2.43e-07	2.35e-05	26.6549	2.14952	NA	NA	NA	NA	NA	NA	NA	NA	NA
MPC	MPC_to_LMP	Rbpj	FALSE	2.51e-07	2.41e-05	26.5941	3.21418	NA	NA	NA	NA	NA	NA	NA	NA	NA
MPC	MPC_to_LMP	Rps19bp1	FALSE	2.53e-07	2.42e-05	26.5788	3.27187	NA	NA	NA	NA	NA	NA	NA	NA	NA
MPC	MPC_to_LMP	Rps9	FALSE	2.6e-07	2.48e-05	26.528	1.23425	NA	NA	NA	NA	NA	NA	NA	NA	NA
MPC	MPC_to_LMP	Hprt	FALSE	2.63e-07	2.49e-05	26.5066	2.49743	NA	NA	NA	NA	NA	NA	NA	NA	NA
MPC	MPC_to_LMP	Grip2	FALSE	2.68e-07	2.53e-05	26.4684	5.18894	NA	NA	NA	NA	NA	NA	NA	NA	NA
MPC	MPC_to_LMP	Rangrf	FALSE	2.76e-07	2.6e-05	26.4116	4.25051	NA	NA	NA	NA	NA	NA	NA	NA	NA
MPC	MPC_to_LMP	Commd3	FALSE	2.83e-07	2.65e-05	26.363	1.89695	NA	NA	NA	NA	NA	NA	NA	NA	NA
MPC	MPC_to_LMP	P3h4	FALSE	3.03e-07	2.82e-05	26.2336	-1.87388	NA	NA	NA	NA	NA	NA	NA	NA	NA
MPC	MPC_to_LMP	Cct7	FALSE	3.04e-07	2.83e-05	26.2222	1.82083	NA	NA	NA	NA	NA	NA	NA	NA	NA
MPC	MPC_to_LMP	Rgcc	FALSE	3.11e-07	2.88e-05	26.1781	-2.16908	NA	NA	NA	NA	NA	NA	NA	NA	NA
MPC	MPC_to_LMP	Ptrh1	FALSE	3.16e-07	2.91e-05	26.15	6.10871	NA	NA	NA	NA	NA	NA	NA	NA	NA
MPC	MPC_to_LMP	Ruvbl2	FALSE	3.36e-07	3.08e-05	26.0299	4.24716	NA	NA	NA	NA	NA	NA	NA	NA	NA
MPC	MPC_to_LMP	Epdr1	FALSE	3.37e-07	3.08e-05	26.0266	3.31625	NA	NA	NA	NA	NA	NA	NA	NA	NA
MPC	MPC_to_LMP	Txndc9	FALSE	3.5e-07	3.18e-05	25.9535	2.28905	NA	NA	NA	NA	NA	NA	NA	NA	NA
MPC	MPC_to_LMP	Hnrnpu	FALSE	3.57e-07	3.23e-05	25.9135	1.92499	NA	NA	NA	NA	NA	NA	NA	NA	NA
MPC	MPC_to_LMP	Cyp26b1	FALSE	3.66e-07	3.3e-05	25.867	4.99755	NA	NA	NA	NA	NA	NA	NA	NA	NA
MPC	MPC_to_LMP	Rps18	FALSE	3.72e-07	3.34e-05	25.835	1.3913	NA	NA	NA	NA	NA	NA	NA	NA	NA
MPC	MPC_to_LMP	Snrpb	FALSE	3.76e-07	3.36e-05	25.8144	1.76623	NA	NA	NA	NA	NA	NA	NA	NA	NA
MPC	MPC_to_LMP	Dnttip2	FALSE	3.9e-07	3.46e-05	25.7435	2.73582	NA	NA	NA	NA	NA	NA	NA	NA	NA
MPC	MPC_to_LMP	Psmd8	FALSE	3.9e-07	3.46e-05	25.7428	1.91539	NA	NA	NA	NA	NA	NA	NA	NA	NA
MPC	MPC_to_LMP	Gss	FALSE	3.99e-07	3.52e-05	25.7011	4.37642	NA	NA	NA	NA	NA	NA	NA	NA	NA
MPC	MPC_to_LMP	Dnaja2	FALSE	4.2e-07	3.7e-05	25.6009	2.25061	NA	NA	NA	NA	NA	NA	NA	NA	NA
MPC	MPC_to_LMP	P4ha2	FALSE	4.32e-07	3.78e-05	25.5444	-2.01021	NA	NA	NA	NA	NA	NA	NA	NA	NA
MPC	MPC_to_LMP	Utp4	FALSE	4.33e-07	3.78e-05	25.5413	3.71384	NA	NA	NA	NA	NA	NA	NA	NA	NA
MPC	MPC_to_LMP	Psma6	FALSE	4.38e-07	3.81e-05	25.5186	1.95371	NA	NA	NA	NA	NA	NA	NA	NA	NA
MPC	MPC_to_LMP	Psmb3	FALSE	4.41e-07	3.82e-05	25.504	1.76398	NA	NA	NA	NA	NA	NA	NA	NA	NA
MPC	MPC_to_LMP	Ndnf	FALSE	4.58e-07	3.95e-05	25.4349	4.1761	NA	NA	NA	NA	NA	NA	NA	NA	NA
MPC	MPC_to_LMP	Angptl2	FALSE	4.88e-07	4.19e-05	25.309	6.23418	NA	NA	NA	NA	NA	NA	NA	NA	NA
MPC	MPC_to_LMP	Cebpz	FALSE	4.9e-07	4.19e-05	25.3041	3.15134	NA	NA	NA	NA	NA	NA	NA	NA	NA
MPC	MPC_to_LMP	Pak1ip1	FALSE	5.07e-07	4.33e-05	25.2356	2.6093	NA	NA	NA	NA	NA	NA	NA	NA	NA
MPC	MPC_to_LMP	Naa20	FALSE	5.26e-07	4.46e-05	25.1675	2.6371	NA	NA	NA	NA	NA	NA	NA	NA	NA
MPC	MPC_to_LMP	Rplp2	FALSE	5.42e-07	4.58e-05	25.1095	1.12789	NA	NA	NA	NA	NA	NA	NA	NA	NA
MPC	MPC_to_LMP	Snhg12	FALSE	5.73e-07	4.83e-05	25.0007	3.066	NA	NA	NA	NA	NA	NA	NA	NA	NA
MPC	MPC_to_LMP	Kcnk1	FALSE	5.78e-07	4.85e-05	24.9848	-3.0093	NA	NA	NA	NA	NA	NA	NA	NA	NA
MPC	MPC_to_LMP	Noc4l	FALSE	5.91e-07	4.94e-05	24.9417	4.5638	NA	NA	NA	NA	NA	NA	NA	NA	NA
MPC	MPC_to_LMP	Vat1	FALSE	6.3e-07	5.25e-05	24.8193	3.26018	NA	NA	NA	NA	NA	NA	NA	NA	NA
MPC	MPC_to_LMP	Aen	FALSE	6.33e-07	5.26e-05	24.8087	3.19427	NA	NA	NA	NA	NA	NA	NA	NA	NA
MPC	MPC_to_LMP	Ddx24	FALSE	6.52e-07	5.39e-05	24.7513	2.27462	NA	NA	NA	NA	NA	NA	NA	NA	NA
MPC	MPC_to_LMP	Rrp1	FALSE	6.63e-07	5.46e-05	24.7197	2.15534	NA	NA	NA	NA	NA	NA	NA	NA	NA
MPC	MPC_to_LMP	Grem1	FALSE	6.72e-07	5.52e-05	24.6932	7.8899	NA	NA	NA	NA	NA	NA	NA	NA	NA
MPC	MPC_to_LMP	Eif5b	FALSE	6.76e-07	5.52e-05	24.6836	2.15372	NA	NA	NA	NA	NA	NA	NA	NA	NA
MPC	MPC_to_LMP	Rps16	FALSE	6.78e-07	5.53e-05	24.6758	1.13008	NA	NA	NA	NA	NA	NA	NA	NA	NA
MPC	MPC_to_LMP	Ctsh	FALSE	6.87e-07	5.57e-05	24.6522	-1.9799	NA	NA	NA	NA	NA	NA	NA	NA	NA
MPC	MPC_to_LMP	Mrpl55	FALSE	7.07e-07	5.7e-05	24.5969	3.52702	NA	NA	NA	NA	NA	NA	NA	NA	NA
MPC	MPC_to_LMP	Qsox1	FALSE	7.08e-07	5.7e-05	24.593	2.84023	NA	NA	NA	NA	NA	NA	NA	NA	NA
MPC	MPC_to_LMP	Pgs1	FALSE	7.27e-07	5.83e-05	24.5421	3.67769	NA	NA	NA	NA	NA	NA	NA	NA	NA
MPC	MPC_to_LMP	Psrc1	FALSE	7.29e-07	5.83e-05	24.5377	6.59312	NA	NA	NA	NA	NA	NA	NA	NA	NA
MPC	MPC_to_LMP	Nop16	FALSE	7.34e-07	5.85e-05	24.5239	3.3943	NA	NA	NA	NA	NA	NA	NA	NA	NA
MPC	MPC_to_LMP	Anxa2	FALSE	7.49e-07	5.94e-05	24.4855	1.73768	NA	NA	NA	NA	NA	NA	NA	NA	NA
MPC	MPC_to_LMP	Rpl19	FALSE	7.53e-07	5.96e-05	24.4743	1.11549	NA	NA	NA	NA	NA	NA	NA	NA	NA
MPC	MPC_to_LMP	Ssrp1	FALSE	7.88e-07	6.19e-05	24.3878	2.46216	NA	NA	NA	NA	NA	NA	NA	NA	NA
MPC	MPC_to_LMP	Timm13	FALSE	7.88e-07	6.19e-05	24.3861	1.58688	NA	NA	NA	NA	NA	NA	NA	NA	NA
MPC	MPC_to_LMP	Twist1	FALSE	7.95e-07	6.22e-05	24.3706	2.85478	NA	NA	NA	NA	NA	NA	NA	NA	NA
MPC	MPC_to_LMP	Mrpl32	FALSE	7.99e-07	6.23e-05	24.3601	2.43029	NA	NA	NA	NA	NA	NA	NA	NA	NA
MPC	MPC_to_LMP	Amhr2	FALSE	8.08e-07	6.27e-05	24.3394	-4.55199	NA	NA	NA	NA	NA	NA	NA	NA	NA
MPC	MPC_to_LMP	Megf10	FALSE	8.11e-07	6.28e-05	24.3321	5.23989	NA	NA	NA	NA	NA	NA	NA	NA	NA
MPC	MPC_to_LMP	Mphosph10	FALSE	8.14e-07	6.28e-05	24.3233	3.28203	NA	NA	NA	NA	NA	NA	NA	NA	NA
MPC	MPC_to_LMP	Vwa1	FALSE	8.66e-07	6.66e-05	24.2043	-5.58668	NA	NA	NA	NA	NA	NA	NA	NA	NA
MPC	MPC_to_LMP	Polr2e	FALSE	8.79e-07	6.7e-05	24.1762	2.19475	NA	NA	NA	NA	NA	NA	NA	NA	NA
MPC	MPC_to_LMP	Arpc1b	FALSE	8.8e-07	6.7e-05	24.1748	1.81556	NA	NA	NA	NA	NA	NA	NA	NA	NA
MPC	MPC_to_LMP	Emp3	FALSE	8.82e-07	6.7e-05	24.1698	1.71621	NA	NA	NA	NA	NA	NA	NA	NA	NA
MPC	MPC_to_LMP	Wdr12	FALSE	8.84e-07	6.7e-05	24.1648	3.78682	NA	NA	NA	NA	NA	NA	NA	NA	NA
MPC	MPC_to_LMP	Rsl24d1	FALSE	9.27e-07	7e-05	24.0738	2.78508	NA	NA	NA	NA	NA	NA	NA	NA	NA
MPC	MPC_to_LMP	Eif2b3	FALSE	9.42e-07	7.07e-05	24.0431	4.26837	NA	NA	NA	NA	NA	NA	NA	NA	NA
MPC	MPC_to_LMP	Drg1	FALSE	9.42e-07	7.07e-05	24.0424	2.77499	NA	NA	NA	NA	NA	NA	NA	NA	NA
MPC	MPC_to_LMP	Btf3	FALSE	9.7e-07	7.25e-05	23.9874	1.21658	NA	NA	NA	NA	NA	NA	NA	NA	NA
MPC	MPC_to_LMP	Arpc2	FALSE	9.79e-07	7.29e-05	23.969	1.52692	NA	NA	NA	NA	NA	NA	NA	NA	NA
MPC	MPC_to_LMP	Rai14	FALSE	9.83e-07	7.3e-05	23.9603	3.60887	NA	NA	NA	NA	NA	NA	NA	NA	NA
MPC	MPC_to_LMP	Dnaja3	FALSE	1.01e-06	7.5e-05	23.9026	4.50542	NA	NA	NA	NA	NA	NA	NA	NA	NA
MPC	MPC_to_LMP	Letm1	FALSE	1.02e-06	7.52e-05	23.8917	4.09543	NA	NA	NA	NA	NA	NA	NA	NA	NA
MPC	MPC_to_LMP	Nucks1	FALSE	1.02e-06	7.52e-05	23.8834	2.14891	NA	NA	NA	NA	NA	NA	NA	NA	NA
MPC	MPC_to_LMP	Nudc	FALSE	1.08e-06	7.92e-05	23.7771	2.21616	NA	NA	NA	NA	NA	NA	NA	NA	NA
MPC	MPC_to_LMP	Vldlr	FALSE	1.1e-06	8.06e-05	23.7373	-2.03925	NA	NA	NA	NA	NA	NA	NA	NA	NA
MPC	MPC_to_LMP	Ccnd1	FALSE	1.11e-06	8.09e-05	23.7242	2.47249	NA	NA	NA	NA	NA	NA	NA	NA	NA
MPC	MPC_to_LMP	Gadd45gip1	FALSE	1.12e-06	8.1e-05	23.7152	2.48115	NA	NA	NA	NA	NA	NA	NA	NA	NA
MPC	MPC_to_LMP	Dnaja1	FALSE	1.12e-06	8.1e-05	23.7099	1.92085	NA	NA	NA	NA	NA	NA	NA	NA	NA
MPC	MPC_to_LMP	Atp5a1	FALSE	1.18e-06	8.48e-05	23.6146	1.39916	NA	NA	NA	NA	NA	NA	NA	NA	NA
MPC	MPC_to_LMP	Eif3l	FALSE	1.2e-06	8.6e-05	23.5819	1.96522	NA	NA	NA	NA	NA	NA	NA	NA	NA
MPC	MPC_to_LMP	Rab14	FALSE	1.29e-06	9.2e-05	23.4445	1.93692	NA	NA	NA	NA	NA	NA	NA	NA	NA
MPC	MPC_to_LMP	Gm19705	FALSE	1.3e-06	9.24e-05	23.4299	-3.7164	NA	NA	NA	NA	NA	NA	NA	NA	NA
MPC	MPC_to_LMP	Uchl3	FALSE	1.31e-06	9.31e-05	23.4093	3.01407	NA	NA	NA	NA	NA	NA	NA	NA	NA
MPC	MPC_to_LMP	Dpysl3	FALSE	1.32e-06	9.34e-05	23.3978	2.8656	NA	NA	NA	NA	NA	NA	NA	NA	NA
MPC	MPC_to_LMP	Tmem86a	FALSE	1.34e-06	9.44e-05	23.3711	5.42381	NA	NA	NA	NA	NA	NA	NA	NA	NA
MPC	MPC_to_LMP	Psmd4	FALSE	1.4e-06	9.85e-05	23.2817	1.97255	NA	NA	NA	NA	NA	NA	NA	NA	NA
MPC	MPC_to_LMP	Ndufs7	FALSE	1.49e-06	0.000104286	23.1665	1.833	NA	NA	NA	NA	NA	NA	NA	NA	NA
MPC	MPC_to_LMP	Srsf3	FALSE	1.56e-06	0.000108901	23.0771	1.93778	NA	NA	NA	NA	NA	NA	NA	NA	NA
MPC	MPC_to_LMP	Capg	FALSE	1.57e-06	0.000109494	23.0605	3.11113	NA	NA	NA	NA	NA	NA	NA	NA	NA
MPC	MPC_to_LMP	Rpl13	FALSE	1.58e-06	0.000109966	23.046	1.07688	NA	NA	NA	NA	NA	NA	NA	NA	NA
MPC	MPC_to_LMP	Fkbp9	FALSE	1.59e-06	0.000110314	23.0339	-1.62503	NA	NA	NA	NA	NA	NA	NA	NA	NA
MPC	MPC_to_LMP	Rps3	FALSE	1.63e-06	0.00011245	22.9909	1.20415	NA	NA	NA	NA	NA	NA	NA	NA	NA
MPC	MPC_to_LMP	Ndufa7	FALSE	1.66e-06	0.000114073	22.9573	1.4346	NA	NA	NA	NA	NA	NA	NA	NA	NA
MPC	MPC_to_LMP	Etf1	FALSE	1.7e-06	0.000116963	22.9031	2.11794	NA	NA	NA	NA	NA	NA	NA	NA	NA
MPC	MPC_to_LMP	Ranbp1	FALSE	1.74e-06	0.000118821	22.8668	1.93921	NA	NA	NA	NA	NA	NA	NA	NA	NA
MPC	MPC_to_LMP	Rab34	FALSE	1.85e-06	0.000126493	22.7405	2.10545	NA	NA	NA	NA	NA	NA	NA	NA	NA
MPC	MPC_to_LMP	Rps19	FALSE	1.89e-06	0.000128848	22.6991	1.10309	NA	NA	NA	NA	NA	NA	NA	NA	NA
MPC	MPC_to_LMP	Arl8a	FALSE	1.9e-06	0.000129045	22.6902	3.1476	NA	NA	NA	NA	NA	NA	NA	NA	NA
MPC	MPC_to_LMP	Emc8	FALSE	1.95e-06	0.000131694	22.6452	2.81644	NA	NA	NA	NA	NA	NA	NA	NA	NA
MPC	MPC_to_LMP	Mrpl38	FALSE	2.02e-06	0.00013607	22.5743	2.95656	NA	NA	NA	NA	NA	NA	NA	NA	NA
MPC	MPC_to_LMP	Gnl3	FALSE	2.03e-06	0.00013607	22.5705	2.30493	NA	NA	NA	NA	NA	NA	NA	NA	NA
MPC	MPC_to_LMP	Rps23	FALSE	2.05e-06	0.000137395	22.546	1.13779	NA	NA	NA	NA	NA	NA	NA	NA	NA
MPC	MPC_to_LMP	Mtch2	FALSE	2.12e-06	0.000140956	22.4869	2.2705	NA	NA	NA	NA	NA	NA	NA	NA	NA
MPC	MPC_to_LMP	Polr2i	FALSE	2.12e-06	0.000140956	22.4851	2.12634	NA	NA	NA	NA	NA	NA	NA	NA	NA
MPC	MPC_to_LMP	Ube2v2	FALSE	2.16e-06	0.000143587	22.4437	2.45296	NA	NA	NA	NA	NA	NA	NA	NA	NA
MPC	MPC_to_LMP	Trmt6	FALSE	2.2e-06	0.000145864	22.4077	4.73972	NA	NA	NA	NA	NA	NA	NA	NA	NA
MPC	MPC_to_LMP	Sf3b2	FALSE	2.24e-06	0.000147762	22.377	2.13164	NA	NA	NA	NA	NA	NA	NA	NA	NA
MPC	MPC_to_LMP	Dnajc8	FALSE	2.27e-06	0.000149074	22.3543	1.96203	NA	NA	NA	NA	NA	NA	NA	NA	NA
MPC	MPC_to_LMP	Comtd1	FALSE	2.31e-06	0.000151337	22.3196	4.89781	NA	NA	NA	NA	NA	NA	NA	NA	NA
MPC	MPC_to_LMP	Alyref	FALSE	2.33e-06	0.00015247	22.2995	2.59164	NA	NA	NA	NA	NA	NA	NA	NA	NA
MPC	MPC_to_LMP	Psmc2	FALSE	2.37e-06	0.000154731	22.2655	2.42211	NA	NA	NA	NA	NA	NA	NA	NA	NA
MPC	MPC_to_LMP	Parl	FALSE	2.41e-06	0.0001566	22.2367	2.62389	NA	NA	NA	NA	NA	NA	NA	NA	NA
MPC	MPC_to_LMP	Dkc1	FALSE	2.47e-06	0.000159782	22.1924	3.2769	NA	NA	NA	NA	NA	NA	NA	NA	NA
MPC	MPC_to_LMP	Kif2a	FALSE	2.53e-06	0.000163438	22.1432	3.46046	NA	NA	NA	NA	NA	NA	NA	NA	NA
MPC	MPC_to_LMP	Tomm22	FALSE	2.6e-06	0.000167397	22.0916	2.22537	NA	NA	NA	NA	NA	NA	NA	NA	NA
MPC	MPC_to_LMP	Psmb5	FALSE	2.62e-06	0.00016782	22.0793	1.63517	NA	NA	NA	NA	NA	NA	NA	NA	NA
MPC	MPC_to_LMP	Ppig	FALSE	2.62e-06	0.00016782	22.0755	1.96528	NA	NA	NA	NA	NA	NA	NA	NA	NA
MPC	MPC_to_LMP	Nolc1	FALSE	2.75e-06	0.00017558	21.9831	2.89859	NA	NA	NA	NA	NA	NA	NA	NA	NA
MPC	MPC_to_LMP	Hspa8	FALSE	2.79e-06	0.000177707	21.9525	1.37507	NA	NA	NA	NA	NA	NA	NA	NA	NA
MPC	MPC_to_LMP	Rps13	FALSE	2.8e-06	0.000177707	21.9488	1.14063	NA	NA	NA	NA	NA	NA	NA	NA	NA
MPC	MPC_to_LMP	Tufm	FALSE	2.92e-06	0.000184848	21.8676	3.49273	NA	NA	NA	NA	NA	NA	NA	NA	NA
MPC	MPC_to_LMP	Ddx39	FALSE	2.94e-06	0.00018557	21.8546	2.9067	NA	NA	NA	NA	NA	NA	NA	NA	NA
MPC	MPC_to_LMP	Thbs1	FALSE	3.03e-06	0.000190425	21.7995	-1.96895	NA	NA	NA	NA	NA	NA	NA	NA	NA
MPC	MPC_to_LMP	Ccdc124	FALSE	3.08e-06	0.000193147	21.7668	2.29673	NA	NA	NA	NA	NA	NA	NA	NA	NA
MPC	MPC_to_LMP	Ahnak2	FALSE	3.16e-06	0.00019782	21.7154	8.47614	NA	NA	NA	NA	NA	NA	NA	NA	NA
MPC	MPC_to_LMP	Polr1d	FALSE	3.18e-06	0.000198134	21.7069	1.51543	NA	NA	NA	NA	NA	NA	NA	NA	NA
MPC	MPC_to_LMP	Pin1	FALSE	3.23e-06	0.00020082	21.6755	2.17993	NA	NA	NA	NA	NA	NA	NA	NA	NA
MPC	MPC_to_LMP	Nop2	FALSE	3.24e-06	0.00020082	21.6701	4.69634	NA	NA	NA	NA	NA	NA	NA	NA	NA
MPC	MPC_to_LMP	Vps29	FALSE	3.26e-06	0.000201455	21.6586	1.99124	NA	NA	NA	NA	NA	NA	NA	NA	NA
MPC	MPC_to_LMP	Naa25	FALSE	3.45e-06	0.000212624	21.547	4.07671	NA	NA	NA	NA	NA	NA	NA	NA	NA
MPC	MPC_to_LMP	Zc3hav1	FALSE	3.46e-06	0.000212624	21.5443	3.26195	NA	NA	NA	NA	NA	NA	NA	NA	NA
MPC	MPC_to_LMP	Mrpl35	FALSE	3.62e-06	0.0002214	21.458	2.24774	NA	NA	NA	NA	NA	NA	NA	NA	NA
MPC	MPC_to_LMP	Rpl3	FALSE	3.62e-06	0.0002214	21.4559	1.25391	NA	NA	NA	NA	NA	NA	NA	NA	NA
MPC	MPC_to_LMP	S100a11	FALSE	3.68e-06	0.00022367	21.4261	1.47235	NA	NA	NA	NA	NA	NA	NA	NA	NA
MPC	MPC_to_LMP	Ftl1-ps1	FALSE	3.68e-06	0.00022367	21.4257	2.64272	NA	NA	NA	NA	NA	NA	NA	NA	NA
MPC	MPC_to_LMP	Mrpl52	FALSE	3.71e-06	0.000224207	21.4107	1.5631	NA	NA	NA	NA	NA	NA	NA	NA	NA
MPC	MPC_to_LMP	Nop10	FALSE	3.71e-06	0.000224207	21.4104	1.77355	NA	NA	NA	NA	NA	NA	NA	NA	NA
MPC	MPC_to_LMP	Sf3b3	FALSE	3.76e-06	0.000226798	21.3831	2.582	NA	NA	NA	NA	NA	NA	NA	NA	NA
MPC	MPC_to_LMP	Lysmd2	FALSE	3.92e-06	0.000235873	21.3026	4.60037	NA	NA	NA	NA	NA	NA	NA	NA	NA
MPC	MPC_to_LMP	Mdm2	FALSE	4.06e-06	0.000243673	21.2349	2.41919	NA	NA	NA	NA	NA	NA	NA	NA	NA
MPC	MPC_to_LMP	Mplkip	FALSE	4.08e-06	0.000243902	21.2279	3.30381	NA	NA	NA	NA	NA	NA	NA	NA	NA
MPC	MPC_to_LMP	Psma4	FALSE	4.23e-06	0.000252545	21.1559	1.73517	NA	NA	NA	NA	NA	NA	NA	NA	NA
MPC	MPC_to_LMP	Psmb7	FALSE	4.25e-06	0.000252669	21.1497	2.04633	NA	NA	NA	NA	NA	NA	NA	NA	NA
MPC	MPC_to_LMP	Fgf7	FALSE	4.44e-06	0.000263348	21.0652	2.97728	NA	NA	NA	NA	NA	NA	NA	NA	NA
MPC	MPC_to_LMP	Fxyd1	FALSE	4.47e-06	0.000264592	21.051	-1.79091	NA	NA	NA	NA	NA	NA	NA	NA	NA
MPC	MPC_to_LMP	Pomp	FALSE	4.69e-06	0.000276555	20.9611	1.5835	NA	NA	NA	NA	NA	NA	NA	NA	NA
MPC	MPC_to_LMP	Tuba1c	FALSE	4.72e-06	0.00027753	20.9491	2.52208	NA	NA	NA	NA	NA	NA	NA	NA	NA
MPC	MPC_to_LMP	Pappa	FALSE	4.78e-06	0.000280227	20.9255	5.8383	NA	NA	NA	NA	NA	NA	NA	NA	NA
MPC	MPC_to_LMP	Rpl27	FALSE	4.79e-06	0.000280476	20.9186	1.30993	NA	NA	NA	NA	NA	NA	NA	NA	NA
MPC	MPC_to_LMP	Eef1g	FALSE	4.81e-06	0.000280586	20.9124	1.20308	NA	NA	NA	NA	NA	NA	NA	NA	NA
MPC	MPC_to_LMP	Prmt7	FALSE	4.83e-06	0.000280586	20.9025	3.94968	NA	NA	NA	NA	NA	NA	NA	NA	NA
MPC	MPC_to_LMP	Ilkap	FALSE	4.83e-06	0.000280586	20.9025	2.51096	NA	NA	NA	NA	NA	NA	NA	NA	NA
MPC	MPC_to_LMP	Clpp	FALSE	4.99e-06	0.000289124	20.84	2.33986	NA	NA	NA	NA	NA	NA	NA	NA	NA
MPC	MPC_to_LMP	Hnrnpa1	FALSE	5.01e-06	0.000289403	20.8331	1.72158	NA	NA	NA	NA	NA	NA	NA	NA	NA
MPC	MPC_to_LMP	Abce1	FALSE	5.11e-06	0.000294263	20.7961	2.35226	NA	NA	NA	NA	NA	NA	NA	NA	NA
MPC	MPC_to_LMP	Pdcd5	FALSE	5.25e-06	0.000301408	20.7451	1.82772	NA	NA	NA	NA	NA	NA	NA	NA	NA
MPC	MPC_to_LMP	Igf2bp2	FALSE	5.28e-06	0.000302751	20.7316	3.70703	NA	NA	NA	NA	NA	NA	NA	NA	NA
MPC	MPC_to_LMP	Eif2s2	FALSE	5.32e-06	0.000303849	20.7196	1.27628	NA	NA	NA	NA	NA	NA	NA	NA	NA
MPC	MPC_to_LMP	Ifi202b	FALSE	5.5e-06	0.000313314	20.6559	3.94959	NA	NA	NA	NA	NA	NA	NA	NA	NA
MPC	MPC_to_LMP	S100a10	FALSE	5.52e-06	0.000313754	20.6482	1.78257	NA	NA	NA	NA	NA	NA	NA	NA	NA
MPC	MPC_to_LMP	Rap1a	FALSE	5.54e-06	0.000314344	20.6396	2.18072	NA	NA	NA	NA	NA	NA	NA	NA	NA
MPC	MPC_to_LMP	Eif3i	FALSE	5.61e-06	0.000316961	20.6175	1.48333	NA	NA	NA	NA	NA	NA	NA	NA	NA
MPC	MPC_to_LMP	Aaas	FALSE	5.62e-06	0.000316961	20.6139	3.36225	NA	NA	NA	NA	NA	NA	NA	NA	NA
MPC	MPC_to_LMP	Tardbp	FALSE	5.64e-06	0.000317141	20.6078	2.41425	NA	NA	NA	NA	NA	NA	NA	NA	NA
MPC	MPC_to_LMP	Tspan11	FALSE	5.74e-06	0.00032202	20.5737	-2.59497	NA	NA	NA	NA	NA	NA	NA	NA	NA
MPC	MPC_to_LMP	Strap	FALSE	5.83e-06	0.000326446	20.5426	1.96709	NA	NA	NA	NA	NA	NA	NA	NA	NA
MPC	MPC_to_LMP	Smarcb1	FALSE	5.91e-06	0.000329812	20.5181	2.4894	NA	NA	NA	NA	NA	NA	NA	NA	NA
MPC	MPC_to_LMP	Snai2	FALSE	5.93e-06	0.000330385	20.5099	4.50941	NA	NA	NA	NA	NA	NA	NA	NA	NA
MPC	MPC_to_LMP	Col5a1	FALSE	6.06e-06	0.000336812	20.4681	-1.5228	NA	NA	NA	NA	NA	NA	NA	NA	NA
MPC	MPC_to_LMP	Mrps18a	FALSE	6.12e-06	0.000339047	20.4506	2.29961	NA	NA	NA	NA	NA	NA	NA	NA	NA
MPC	MPC_to_LMP	Rbbp7	FALSE	6.16e-06	0.000340456	20.4378	2.46262	NA	NA	NA	NA	NA	NA	NA	NA	NA
MPC	MPC_to_LMP	Gal	FALSE	6.28e-06	0.000346259	20.4006	-3.76311	NA	NA	NA	NA	NA	NA	NA	NA	NA
MPC	MPC_to_LMP	Bcap29	FALSE	6.7e-06	0.000368377	20.2773	4.98779	NA	NA	NA	NA	NA	NA	NA	NA	NA
MPC	MPC_to_LMP	Prpf40a	FALSE	6.76e-06	0.00037058	20.2611	2.16928	NA	NA	NA	NA	NA	NA	NA	NA	NA
MPC	MPC_to_LMP	Sqstm1	FALSE	6.85e-06	0.000373713	20.2352	1.93818	NA	NA	NA	NA	NA	NA	NA	NA	NA
MPC	MPC_to_LMP	Rps27a	FALSE	6.85e-06	0.000373713	20.2333	1.06337	NA	NA	NA	NA	NA	NA	NA	NA	NA
MPC	MPC_to_LMP	Plpp2	FALSE	6.86e-06	0.000373713	20.2306	4.25285	NA	NA	NA	NA	NA	NA	NA	NA	NA
MPC	MPC_to_LMP	Pes1	FALSE	6.9e-06	0.00037468	20.2209	2.9454	NA	NA	NA	NA	NA	NA	NA	NA	NA
MPC	MPC_to_LMP	Vps36	FALSE	7.03e-06	0.000380574	20.1863	2.59357	NA	NA	NA	NA	NA	NA	NA	NA	NA
MPC	MPC_to_LMP	Txnl1	FALSE	7.04e-06	0.000380611	20.1814	1.84498	NA	NA	NA	NA	NA	NA	NA	NA	NA
MPC	MPC_to_LMP	Loxl4	FALSE	7.22e-06	0.000389267	20.1336	-3.0498	NA	NA	NA	NA	NA	NA	NA	NA	NA
MPC	MPC_to_LMP	Arf3	FALSE	7.36e-06	0.000395053	20.0983	2.67751	NA	NA	NA	NA	NA	NA	NA	NA	NA
MPC	MPC_to_LMP	Fosl1	FALSE	7.37e-06	0.000395053	20.096	4.7498	NA	NA	NA	NA	NA	NA	NA	NA	NA
MPC	MPC_to_LMP	Loxl1	FALSE	7.54e-06	0.000403363	20.0515	3.7155	NA	NA	NA	NA	NA	NA	NA	NA	NA
MPC	MPC_to_LMP	Mphosph8	FALSE	7.67e-06	0.000409423	20.0177	2.88366	NA	NA	NA	NA	NA	NA	NA	NA	NA
MPC	MPC_to_LMP	Rps2	FALSE	7.69e-06	0.000409423	20.0131	1.22394	NA	NA	NA	NA	NA	NA	NA	NA	NA
MPC	MPC_to_LMP	Rpl7l1	FALSE	7.71e-06	0.000409423	20.009	2.15462	NA	NA	NA	NA	NA	NA	NA	NA	NA
MPC	MPC_to_LMP	Psmg3	FALSE	7.77e-06	0.000411776	19.9934	3.70817	NA	NA	NA	NA	NA	NA	NA	NA	NA
MPC	MPC_to_LMP	Aldh2	FALSE	7.9e-06	0.000417646	19.9617	2.05627	NA	NA	NA	NA	NA	NA	NA	NA	NA
MPC	MPC_to_LMP	Nufip1	FALSE	8e-06	0.000421065	19.9384	3.75011	NA	NA	NA	NA	NA	NA	NA	NA	NA
MPC	MPC_to_LMP	Gar1	FALSE	8e-06	0.000421065	19.9368	2.83914	NA	NA	NA	NA	NA	NA	NA	NA	NA
MPC	MPC_to_LMP	Fam20a	FALSE	8.1e-06	0.000425179	19.9136	6.04239	NA	NA	NA	NA	NA	NA	NA	NA	NA
MPC	MPC_to_LMP	Nudt21	FALSE	8.16e-06	0.000427078	19.9005	2.19363	NA	NA	NA	NA	NA	NA	NA	NA	NA
MPC	MPC_to_LMP	Rpl9	FALSE	8.24e-06	0.000430522	19.8806	1.1022	NA	NA	NA	NA	NA	NA	NA	NA	NA
MPC	MPC_to_LMP	Rps26	FALSE	8.28e-06	0.0004313	19.8726	1.06511	NA	NA	NA	NA	NA	NA	NA	NA	NA
MPC	MPC_to_LMP	Insc	FALSE	8.38e-06	0.000435171	19.8483	2.47464	NA	NA	NA	NA	NA	NA	NA	NA	NA
MPC	MPC_to_LMP	Glrx5	FALSE	8.39e-06	0.000435171	19.8464	1.88127	NA	NA	NA	NA	NA	NA	NA	NA	NA
MPC	MPC_to_LMP	Zeb2	FALSE	8.8e-06	0.000455101	19.7563	2.11509	NA	NA	NA	NA	NA	NA	NA	NA	NA
MPC	MPC_to_LMP	Prmt3	FALSE	8.82e-06	0.000455186	19.7514	3.70037	NA	NA	NA	NA	NA	NA	NA	NA	NA
MPC	MPC_to_LMP	Grpel1	FALSE	9.31e-06	0.000479243	19.6485	1.91524	NA	NA	NA	NA	NA	NA	NA	NA	NA
MPC	MPC_to_LMP	Mapk3	FALSE	9.35e-06	0.000480334	19.6396	2.38825	NA	NA	NA	NA	NA	NA	NA	NA	NA
MPC	MPC_to_LMP	Pdcd6ip	FALSE	9.44e-06	0.000483924	19.6209	2.05719	NA	NA	NA	NA	NA	NA	NA	NA	NA
MPC	MPC_to_LMP	Rps15a	FALSE	9.56e-06	0.000488521	19.5984	1.10779	NA	NA	NA	NA	NA	NA	NA	NA	NA
MPC	MPC_to_LMP	Ifi204	FALSE	9.71e-06	0.000495132	19.5682	4.86365	NA	NA	NA	NA	NA	NA	NA	NA	NA
MPC	MPC_to_LMP	Rcc2	FALSE	9.81e-06	0.000499462	19.5471	2.47462	NA	NA	NA	NA	NA	NA	NA	NA	NA
MPC	MPC_to_LMP	Rae1	FALSE	9.87e-06	0.000501191	19.5361	2.87146	NA	NA	NA	NA	NA	NA	NA	NA	NA
MPC	MPC_to_LMP	Snrpg	FALSE	9.97e-06	0.000504935	19.5174	1.739	NA	NA	NA	NA	NA	NA	NA	NA	NA
MPC	MPC_to_LMP	Rps11	FALSE	1.08e-05	0.000546891	19.3583	1.03417	NA	NA	NA	NA	NA	NA	NA	NA	NA
MPC	MPC_to_LMP	Twistnb	FALSE	1.09e-05	0.000546891	19.3548	2.45717	NA	NA	NA	NA	NA	NA	NA	NA	NA
MPC	MPC_to_LMP	Actr3	FALSE	1.09e-05	0.000546891	19.3517	1.80518	NA	NA	NA	NA	NA	NA	NA	NA	NA
MPC	MPC_to_LMP	Tomm7	FALSE	1.11e-05	0.000557564	19.3104	1.47661	NA	NA	NA	NA	NA	NA	NA	NA	NA
MPC	MPC_to_LMP	Dctpp1	FALSE	1.13e-05	0.000565265	19.2798	2.7759	NA	NA	NA	NA	NA	NA	NA	NA	NA
MPC	MPC_to_LMP	Ccdc162	FALSE	1.18e-05	0.000587879	19.2006	3.71759	NA	NA	NA	NA	NA	NA	NA	NA	NA
MPC	MPC_to_LMP	Eif1ax	FALSE	1.19e-05	0.000592767	19.1804	1.64479	NA	NA	NA	NA	NA	NA	NA	NA	NA
MPC	MPC_to_LMP	Ecm1	FALSE	1.22e-05	0.000605956	19.134	2.73959	NA	NA	NA	NA	NA	NA	NA	NA	NA
MPC	MPC_to_LMP	Mrpl3	FALSE	1.34e-05	0.000663503	18.9566	2.72814	NA	NA	NA	NA	NA	NA	NA	NA	NA
MPC	MPC_to_LMP	Nav2	FALSE	1.35e-05	0.000667104	18.9419	5.36048	NA	NA	NA	NA	NA	NA	NA	NA	NA
MPC	MPC_to_LMP	Ak1	FALSE	1.39e-05	0.000684556	18.8883	2.0231	NA	NA	NA	NA	NA	NA	NA	NA	NA
MPC	MPC_to_LMP	Cdkn2a	FALSE	1.4e-05	0.000689405	18.8706	3.40988	NA	NA	NA	NA	NA	NA	NA	NA	NA
MPC	MPC_to_LMP	Prkg2	FALSE	1.42e-05	0.000695539	18.8475	11.7993	NA	NA	NA	NA	NA	NA	NA	NA	NA
MPC	MPC_to_LMP	Bzw2	FALSE	1.42e-05	0.000695539	18.8451	2.74288	NA	NA	NA	NA	NA	NA	NA	NA	NA
MPC	MPC_to_LMP	Gfer	FALSE	1.47e-05	0.000719506	18.7737	2.68807	NA	NA	NA	NA	NA	NA	NA	NA	NA
MPC	MPC_to_LMP	Fgfr1	FALSE	1.47e-05	0.000719506	18.7719	1.73336	NA	NA	NA	NA	NA	NA	NA	NA	NA
MPC	MPC_to_LMP	Umps	FALSE	1.48e-05	0.000720395	18.7653	3.57173	NA	NA	NA	NA	NA	NA	NA	NA	NA
MPC	MPC_to_LMP	Hsd17b11	FALSE	1.49e-05	0.000722215	18.7562	5.14166	NA	NA	NA	NA	NA	NA	NA	NA	NA
MPC	MPC_to_LMP	Aldoc	FALSE	1.5e-05	0.000726577	18.7405	-3.11868	NA	NA	NA	NA	NA	NA	NA	NA	NA
MPC	MPC_to_LMP	Imp4	FALSE	1.53e-05	0.00073966	18.7019	2.76226	NA	NA	NA	NA	NA	NA	NA	NA	NA
MPC	MPC_to_LMP	Ddx21	FALSE	1.53e-05	0.00073966	18.698	2.48292	NA	NA	NA	NA	NA	NA	NA	NA	NA
MPC	MPC_to_LMP	Gcsh	FALSE	1.54e-05	0.000741237	18.6897	2.73487	NA	NA	NA	NA	NA	NA	NA	NA	NA
MPC	MPC_to_LMP	Rpl36	FALSE	1.55e-05	0.000747501	18.6695	1.06982	NA	NA	NA	NA	NA	NA	NA	NA	NA
MPC	MPC_to_LMP	Kcnn4	FALSE	1.58e-05	0.000756726	18.6419	5.201	NA	NA	NA	NA	NA	NA	NA	NA	NA
MPC	MPC_to_LMP	Zmat3	FALSE	1.59e-05	0.000759668	18.6303	3.0717	NA	NA	NA	NA	NA	NA	NA	NA	NA
MPC	MPC_to_LMP	Mmp14	FALSE	1.63e-05	0.000779437	18.5772	2.42262	NA	NA	NA	NA	NA	NA	NA	NA	NA
MPC	MPC_to_LMP	Eef1d	FALSE	1.64e-05	0.000779491	18.571	1.29412	NA	NA	NA	NA	NA	NA	NA	NA	NA
MPC	MPC_to_LMP	Cited2	FALSE	1.64e-05	0.000779491	18.5687	2.52042	NA	NA	NA	NA	NA	NA	NA	NA	NA
MPC	MPC_to_LMP	Trim47	FALSE	1.72e-05	0.000816286	18.4766	4.36354	NA	NA	NA	NA	NA	NA	NA	NA	NA
MPC	MPC_to_LMP	Zfp503	FALSE	1.73e-05	0.000819605	18.4648	5.70672	NA	NA	NA	NA	NA	NA	NA	NA	NA
MPC	MPC_to_LMP	Cercam	FALSE	1.76e-05	0.000830946	18.4345	-2.05364	NA	NA	NA	NA	NA	NA	NA	NA	NA
MPC	MPC_to_LMP	Bub3	FALSE	1.79e-05	0.000844472	18.3996	2.36577	NA	NA	NA	NA	NA	NA	NA	NA	NA
MPC	MPC_to_LMP	Wdr74	FALSE	1.8e-05	0.000846796	18.3902	4.0028	NA	NA	NA	NA	NA	NA	NA	NA	NA
MPC	MPC_to_LMP	Med19	FALSE	1.87e-05	0.00087918	18.3146	3.15464	NA	NA	NA	NA	NA	NA	NA	NA	NA
MPC	MPC_to_LMP	Ehd2	FALSE	1.92e-05	0.0008974	18.2714	4.59415	NA	NA	NA	NA	NA	NA	NA	NA	NA
MPC	MPC_to_LMP	Pfn1	FALSE	1.94e-05	0.000905858	18.2495	1.27462	NA	NA	NA	NA	NA	NA	NA	NA	NA
MPC	MPC_to_LMP	2023-09-07	FALSE	1.95e-05	0.000908703	18.2389	1.69576	NA	NA	NA	NA	NA	NA	NA	NA	NA
MPC	MPC_to_LMP	Slc37a2	FALSE	1.95e-05	0.000908703	18.2338	-4.51186	NA	NA	NA	NA	NA	NA	NA	NA	NA
MPC	MPC_to_LMP	Plrg1	FALSE	1.96e-05	0.000908703	18.2313	3.44301	NA	NA	NA	NA	NA	NA	NA	NA	NA
MPC	MPC_to_LMP	Thbs4	FALSE	1.97e-05	0.000912002	18.2204	-2.90434	NA	NA	NA	NA	NA	NA	NA	NA	NA
MPC	MPC_to_LMP	Matr3	FALSE	1.98e-05	0.000915006	18.2099	1.82945	NA	NA	NA	NA	NA	NA	NA	NA	NA
MPC	MPC_to_LMP	Sf3b4	FALSE	1.98e-05	0.000915006	18.206	2.43092	NA	NA	NA	NA	NA	NA	NA	NA	NA
MPC	MPC_to_LMP	Slc19a1	FALSE	2.03e-05	0.000934512	18.1618	3.62783	NA	NA	NA	NA	NA	NA	NA	NA	NA
MPC	MPC_to_LMP	Hint1	FALSE	2.08e-05	0.000957208	18.1121	1.146	NA	NA	NA	NA	NA	NA	NA	NA	NA
MPC	MPC_to_LMP	Rplp0	FALSE	2.09e-05	0.000959483	18.1022	1.09792	NA	NA	NA	NA	NA	NA	NA	NA	NA
MPC	MPC_to_LMP	Pdgfd	FALSE	2.1e-05	0.000959483	18.0996	-2.96369	NA	NA	NA	NA	NA	NA	NA	NA	NA
MPC	MPC_to_LMP	Lamtor1	FALSE	2.11e-05	0.000962038	18.0906	1.73691	NA	NA	NA	NA	NA	NA	NA	NA	NA
MPC	MPC_to_LMP	Ubc	FALSE	2.14e-05	0.000976665	18.0575	1.27009	NA	NA	NA	NA	NA	NA	NA	NA	NA
MPC	MPC_to_LMP	Timm50	FALSE	2.15e-05	0.000976665	18.0539	2.50731	NA	NA	NA	NA	NA	NA	NA	NA	NA
MPC	MPC_to_LMP	Cfdp1	FALSE	2.17e-05	0.000983612	18.0364	1.59025	NA	NA	NA	NA	NA	NA	NA	NA	NA
MPC	MPC_to_LMP	Agfg1	FALSE	2.19e-05	0.000989928	18.0203	3.48461	NA	NA	NA	NA	NA	NA	NA	NA	NA
MPC	MPC_to_LMP	Tcerg1	FALSE	2.21e-05	0.000998081	18.0007	2.96827	NA	NA	NA	NA	NA	NA	NA	NA	NA
MPC	MPC_to_LMP	Rps6	FALSE	2.24e-05	0.00101213	17.9702	1.06904	NA	NA	NA	NA	NA	NA	NA	NA	NA
MPC	MPC_to_LMP	Coq5	FALSE	2.26e-05	0.00101872	17.9539	3.38264	NA	NA	NA	NA	NA	NA	NA	NA	NA
MPC	MPC_to_LMP	Mrpl45	FALSE	2.27e-05	0.00102059	17.9465	2.66079	NA	NA	NA	NA	NA	NA	NA	NA	NA
MPC	MPC_to_LMP	Mrpl1	FALSE	2.28e-05	0.00102396	17.9363	3.31883	NA	NA	NA	NA	NA	NA	NA	NA	NA
MPC	MPC_to_LMP	Stard3nl	FALSE	2.29e-05	0.00102442	17.9315	2.6942	NA	NA	NA	NA	NA	NA	NA	NA	NA
MPC	MPC_to_LMP	Cavin1	FALSE	2.3e-05	0.00102756	17.9218	2.46218	NA	NA	NA	NA	NA	NA	NA	NA	NA
MPC	MPC_to_LMP	Sorbs2	FALSE	2.4e-05	0.00106627	17.8455	-2.7	NA	NA	NA	NA	NA	NA	NA	NA	NA
MPC	MPC_to_LMP	Nifk	FALSE	2.4e-05	0.00106627	17.8437	2.49302	NA	NA	NA	NA	NA	NA	NA	NA	NA
MPC	MPC_to_LMP	Tomm70a	FALSE	2.41e-05	0.0010708	17.8318	2.56127	NA	NA	NA	NA	NA	NA	NA	NA	NA
MPC	MPC_to_LMP	Ndufb9	FALSE	2.42e-05	0.00107259	17.8247	1.28318	NA	NA	NA	NA	NA	NA	NA	NA	NA
MPC	MPC_to_LMP	Upf3b	FALSE	2.45e-05	0.00108423	17.8003	3.4488	NA	NA	NA	NA	NA	NA	NA	NA	NA
MPC	MPC_to_LMP	Eif3c	FALSE	2.52e-05	0.00111333	17.7461	1.44273	NA	NA	NA	NA	NA	NA	NA	NA	NA
MPC	MPC_to_LMP	Sypl	FALSE	2.54e-05	0.00111835	17.7337	1.93857	NA	NA	NA	NA	NA	NA	NA	NA	NA
MPC	MPC_to_LMP	Pinx1	FALSE	2.55e-05	0.00112211	17.7234	4.39208	NA	NA	NA	NA	NA	NA	NA	NA	NA
MPC	MPC_to_LMP	Ptms	FALSE	2.57e-05	0.0011276	17.7104	1.48038	NA	NA	NA	NA	NA	NA	NA	NA	NA
MPC	MPC_to_LMP	Tbca	FALSE	2.59e-05	0.0011332	17.6971	1.34805	NA	NA	NA	NA	NA	NA	NA	NA	NA
MPC	MPC_to_LMP	Zpr1	FALSE	2.69e-05	0.00117619	17.6225	2.67659	NA	NA	NA	NA	NA	NA	NA	NA	NA
MPC	MPC_to_LMP	Psmc6	FALSE	2.72e-05	0.00118448	17.6053	1.72775	NA	NA	NA	NA	NA	NA	NA	NA	NA
MPC	MPC_to_LMP	Raly	FALSE	2.73e-05	0.00118631	17.5967	1.63106	NA	NA	NA	NA	NA	NA	NA	NA	NA
MPC	MPC_to_LMP	Pcbp4	FALSE	2.73e-05	0.00118631	17.5948	3.26769	NA	NA	NA	NA	NA	NA	NA	NA	NA
MPC	MPC_to_LMP	Mrps22	FALSE	2.79e-05	0.00120897	17.555	3.42515	NA	NA	NA	NA	NA	NA	NA	NA	NA
MPC	MPC_to_LMP	Atf5	FALSE	2.84e-05	0.00122563	17.5253	2.19288	NA	NA	NA	NA	NA	NA	NA	NA	NA
MPC	MPC_to_LMP	Snw1	FALSE	2.99e-05	0.0012912	17.4224	2.24067	NA	NA	NA	NA	NA	NA	NA	NA	NA
MPC	MPC_to_LMP	Frmd8	FALSE	3.01e-05	0.00129676	17.4105	3.92822	NA	NA	NA	NA	NA	NA	NA	NA	NA
MPC	MPC_to_LMP	Axl	FALSE	3.03e-05	0.00130339	17.3971	5.48647	NA	NA	NA	NA	NA	NA	NA	NA	NA
MPC	MPC_to_LMP	Abhd4	FALSE	3.1e-05	0.00133144	17.3529	3.73597	NA	NA	NA	NA	NA	NA	NA	NA	NA
MPC	MPC_to_LMP	Nfe2l2	FALSE	3.11e-05	0.00133274	17.3473	2.15715	NA	NA	NA	NA	NA	NA	NA	NA	NA
MPC	MPC_to_LMP	Guk1	FALSE	3.23e-05	0.00137805	17.2778	2.49485	NA	NA	NA	NA	NA	NA	NA	NA	NA
MPC	MPC_to_LMP	Sumo2	FALSE	3.23e-05	0.00137805	17.2763	1.317	NA	NA	NA	NA	NA	NA	NA	NA	NA
MPC	MPC_to_LMP	Phb	FALSE	3.24e-05	0.0013781	17.2725	2.4624	NA	NA	NA	NA	NA	NA	NA	NA	NA
MPC	MPC_to_LMP	Sfrp4	FALSE	3.27e-05	0.00138873	17.2542	5.25354	NA	NA	NA	NA	NA	NA	NA	NA	NA
MPC	MPC_to_LMP	Wls	FALSE	3.32e-05	0.00140939	17.2225	1.80997	NA	NA	NA	NA	NA	NA	NA	NA	NA
MPC	MPC_to_LMP	Tnfrsf19	FALSE	3.35e-05	0.00141666	17.209	4.91403	NA	NA	NA	NA	NA	NA	NA	NA	NA
MPC	MPC_to_LMP	Pfdn1	FALSE	3.4e-05	0.0014375	17.1776	1.6372	NA	NA	NA	NA	NA	NA	NA	NA	NA
MPC	MPC_to_LMP	Pum3	FALSE	3.51e-05	0.00147436	17.1211	2.97848	NA	NA	NA	NA	NA	NA	NA	NA	NA
MPC	MPC_to_LMP	Cyp1b1	FALSE	3.51e-05	0.00147436	17.1202	3.42794	NA	NA	NA	NA	NA	NA	NA	NA	NA
MPC	MPC_to_LMP	Mgat4b	FALSE	3.51e-05	0.00147436	17.1185	3.17457	NA	NA	NA	NA	NA	NA	NA	NA	NA
MPC	MPC_to_LMP	Phldb2	FALSE	3.57e-05	0.00149415	17.0895	4.59973	NA	NA	NA	NA	NA	NA	NA	NA	NA
MPC	MPC_to_LMP	Surf2	FALSE	3.63e-05	0.00151435	17.0572	3.57314	NA	NA	NA	NA	NA	NA	NA	NA	NA
MPC	MPC_to_LMP	Timm44	FALSE	3.63e-05	0.00151435	17.0568	2.62239	NA	NA	NA	NA	NA	NA	NA	NA	NA
MPC	MPC_to_LMP	Rbpms2	FALSE	3.66e-05	0.00152226	17.0393	6.05831	NA	NA	NA	NA	NA	NA	NA	NA	NA
MPC	MPC_to_LMP	Bloc1s2	FALSE	3.66e-05	0.00152226	17.0383	2.551	NA	NA	NA	NA	NA	NA	NA	NA	NA
MPC	MPC_to_LMP	Rpl12	FALSE	3.67e-05	0.00152226	17.0332	1.1606	NA	NA	NA	NA	NA	NA	NA	NA	NA
MPC	MPC_to_LMP	Gtf2h1	FALSE	3.67e-05	0.00152226	17.0324	3.04504	NA	NA	NA	NA	NA	NA	NA	NA	NA
MPC	MPC_to_LMP	Rps14	FALSE	3.69e-05	0.00152618	17.0239	0.976116	NA	NA	NA	NA	NA	NA	NA	NA	NA
MPC	MPC_to_LMP	Nsg1	FALSE	3.77e-05	0.00155475	16.9851	3.2081	NA	NA	NA	NA	NA	NA	NA	NA	NA
MPC	MPC_to_LMP	Rcl1	FALSE	3.79e-05	0.00156014	16.9726	3.45734	NA	NA	NA	NA	NA	NA	NA	NA	NA
MPC	MPC_to_LMP	Plxdc2	FALSE	3.79e-05	0.00156014	16.9714	4.6637	NA	NA	NA	NA	NA	NA	NA	NA	NA
MPC	MPC_to_LMP	Knop1	FALSE	3.88e-05	0.0015906	16.9305	2.57346	NA	NA	NA	NA	NA	NA	NA	NA	NA
MPC	MPC_to_LMP	Ssu72	FALSE	3.88e-05	0.0015906	16.9275	1.83501	NA	NA	NA	NA	NA	NA	NA	NA	NA
MPC	MPC_to_LMP	Grwd1	FALSE	3.97e-05	0.00162127	16.887	3.85373	NA	NA	NA	NA	NA	NA	NA	NA	NA
MPC	MPC_to_LMP	Snrpa	FALSE	3.97e-05	0.00162127	16.8842	2.00652	NA	NA	NA	NA	NA	NA	NA	NA	NA
MPC	MPC_to_LMP	Atad3a	FALSE	4e-05	0.00162835	16.8713	3.41092	NA	NA	NA	NA	NA	NA	NA	NA	NA
MPC	MPC_to_LMP	Slc35a2	FALSE	4.01e-05	0.00162835	16.8688	-1.91522	NA	NA	NA	NA	NA	NA	NA	NA	NA
MPC	MPC_to_LMP	Prkar2b	FALSE	4.05e-05	0.00164518	16.8458	4.93641	NA	NA	NA	NA	NA	NA	NA	NA	NA
MPC	MPC_to_LMP	Psma3	FALSE	4.06e-05	0.00164593	16.8414	1.41449	NA	NA	NA	NA	NA	NA	NA	NA	NA
MPC	MPC_to_LMP	Hmga1b	FALSE	4.14e-05	0.00167552	16.804	13.084	NA	NA	NA	NA	NA	NA	NA	NA	NA
MPC	MPC_to_LMP	Pgls	FALSE	4.19e-05	0.0016916	16.7824	1.42718	NA	NA	NA	NA	NA	NA	NA	NA	NA
MPC	MPC_to_LMP	Cpt1c	FALSE	4.23e-05	0.0017018	16.7667	3.71342	NA	NA	NA	NA	NA	NA	NA	NA	NA
MPC	MPC_to_LMP	Anxa3	FALSE	4.23e-05	0.0017018	16.764	2.75904	NA	NA	NA	NA	NA	NA	NA	NA	NA
MPC	MPC_to_LMP	Stc2	FALSE	4.25e-05	0.00170224	16.7553	-2.80225	NA	NA	NA	NA	NA	NA	NA	NA	NA
MPC	MPC_to_LMP	Psmg2	FALSE	4.26e-05	0.00170224	16.7524	2.77329	NA	NA	NA	NA	NA	NA	NA	NA	NA
MPC	MPC_to_LMP	Dynlt3	FALSE	4.26e-05	0.00170224	16.7513	1.89798	NA	NA	NA	NA	NA	NA	NA	NA	NA
MPC	MPC_to_LMP	Pcbp1	FALSE	4.27e-05	0.00170224	16.7496	1.29756	NA	NA	NA	NA	NA	NA	NA	NA	NA
MPC	MPC_to_LMP	Acadl	FALSE	4.32e-05	0.00171757	16.7261	2.76036	NA	NA	NA	NA	NA	NA	NA	NA	NA
MPC	MPC_to_LMP	Pik3r1	FALSE	4.32e-05	0.00171757	16.7235	3.01654	NA	NA	NA	NA	NA	NA	NA	NA	NA
MPC	MPC_to_LMP	Psma2	FALSE	4.33e-05	0.00171757	16.7222	1.41098	NA	NA	NA	NA	NA	NA	NA	NA	NA
MPC	MPC_to_LMP	Dap3	FALSE	4.38e-05	0.00173422	16.7004	2.1306	NA	NA	NA	NA	NA	NA	NA	NA	NA
MPC	MPC_to_LMP	Rpl15	FALSE	4.5e-05	0.00178138	16.6461	1.06326	NA	NA	NA	NA	NA	NA	NA	NA	NA
MPC	MPC_to_LMP	Frg1	FALSE	4.52e-05	0.00178285	16.6411	2.28806	NA	NA	NA	NA	NA	NA	NA	NA	NA
MPC	MPC_to_LMP	Ints11	FALSE	4.54e-05	0.00178932	16.6308	2.77792	NA	NA	NA	NA	NA	NA	NA	NA	NA
MPC	MPC_to_LMP	Ndufs2	FALSE	4.6e-05	0.00180891	16.6068	1.50081	NA	NA	NA	NA	NA	NA	NA	NA	NA
MPC	MPC_to_LMP	Phc2	FALSE	4.67e-05	0.00183367	16.5776	2.68826	NA	NA	NA	NA	NA	NA	NA	NA	NA
MPC	MPC_to_LMP	Nme4	FALSE	4.74e-05	0.00185905	16.5481	3.46565	NA	NA	NA	NA	NA	NA	NA	NA	NA
MPC	MPC_to_LMP	Rwdd1	FALSE	4.77e-05	0.00186489	16.5363	1.55637	NA	NA	NA	NA	NA	NA	NA	NA	NA
MPC	MPC_to_LMP	Ppfibp1	FALSE	4.78e-05	0.00186489	16.5353	2.06983	NA	NA	NA	NA	NA	NA	NA	NA	NA
MPC	MPC_to_LMP	Rpl28	FALSE	4.82e-05	0.00187945	16.5172	1.07755	NA	NA	NA	NA	NA	NA	NA	NA	NA
MPC	MPC_to_LMP	Snrnp40	FALSE	4.87e-05	0.00189107	16.4984	2.95028	NA	NA	NA	NA	NA	NA	NA	NA	NA
MPC	MPC_to_LMP	Rps17	FALSE	4.87e-05	0.00189107	16.4977	1.01089	NA	NA	NA	NA	NA	NA	NA	NA	NA
MPC	MPC_to_LMP	Arhgdia	FALSE	4.88e-05	0.00189107	16.4954	1.42619	NA	NA	NA	NA	NA	NA	NA	NA	NA
MPC	MPC_to_LMP	Cyc1	FALSE	4.97e-05	0.00192194	16.4613	1.75431	NA	NA	NA	NA	NA	NA	NA	NA	NA
MPC	MPC_to_LMP	Ephx1	FALSE	5e-05	0.00193045	16.4496	2.82724	NA	NA	NA	NA	NA	NA	NA	NA	NA
MPC	MPC_to_LMP	Vmp1	FALSE	5.01e-05	0.00193284	16.4439	1.80496	NA	NA	NA	NA	NA	NA	NA	NA	NA
MPC	MPC_to_LMP	Slc25a3	FALSE	5.03e-05	0.00193558	16.4379	1.1882	NA	NA	NA	NA	NA	NA	NA	NA	NA
MPC	MPC_to_LMP	Glipr1	FALSE	5.14e-05	0.00197584	16.3955	3.40043	NA	NA	NA	NA	NA	NA	NA	NA	NA
MPC	MPC_to_LMP	Arl6ip5	FALSE	5.17e-05	0.00198549	16.3829	1.65542	NA	NA	NA	NA	NA	NA	NA	NA	NA
MPC	MPC_to_LMP	Ube2j2	FALSE	5.19e-05	0.00198607	16.379	2.1438	NA	NA	NA	NA	NA	NA	NA	NA	NA
MPC	MPC_to_LMP	Vkorc1	FALSE	5.28e-05	0.00201698	16.3464	-1.43802	NA	NA	NA	NA	NA	NA	NA	NA	NA
MPC	MPC_to_LMP	Uap1l1	FALSE	5.31e-05	0.00202802	16.3328	4.03634	NA	NA	NA	NA	NA	NA	NA	NA	NA
MPC	MPC_to_LMP	Carnmt1	FALSE	5.34e-05	0.00203494	16.323	2.40728	NA	NA	NA	NA	NA	NA	NA	NA	NA
MPC	MPC_to_LMP	Zfhx4	FALSE	5.36e-05	0.00203899	16.3159	2.84081	NA	NA	NA	NA	NA	NA	NA	NA	NA
MPC	MPC_to_LMP	Pdap1	FALSE	5.39e-05	0.00204635	16.3058	1.52251	NA	NA	NA	NA	NA	NA	NA	NA	NA
MPC	MPC_to_LMP	Tpm3	FALSE	5.41e-05	0.00205117	16.2981	2.09421	NA	NA	NA	NA	NA	NA	NA	NA	NA
MPC	MPC_to_LMP	Hnrnpa0	FALSE	5.42e-05	0.00205197	16.294	1.32612	NA	NA	NA	NA	NA	NA	NA	NA	NA
MPC	MPC_to_LMP	Rpf2	FALSE	5.47e-05	0.00206615	16.2777	3.24369	NA	NA	NA	NA	NA	NA	NA	NA	NA
MPC	MPC_to_LMP	Dpy30	FALSE	5.5e-05	0.00207286	16.2683	2.69517	NA	NA	NA	NA	NA	NA	NA	NA	NA
MPC	MPC_to_LMP	Ccdc86	FALSE	5.54e-05	0.00208473	16.2542	3.18236	NA	NA	NA	NA	NA	NA	NA	NA	NA
MPC	MPC_to_LMP	Hspb1	FALSE	5.58e-05	0.00209758	16.2393	3.48892	NA	NA	NA	NA	NA	NA	NA	NA	NA
MPC	MPC_to_LMP	Cops6	FALSE	5.6e-05	0.00210142	16.2326	1.69155	NA	NA	NA	NA	NA	NA	NA	NA	NA
MPC	MPC_to_LMP	Adss	FALSE	5.81e-05	0.00217394	16.1651	2.34472	NA	NA	NA	NA	NA	NA	NA	NA	NA
MPC	MPC_to_LMP	Cd3eap	FALSE	5.86e-05	0.00219033	16.1476	2.59235	NA	NA	NA	NA	NA	NA	NA	NA	NA
MPC	MPC_to_LMP	Wscd2	FALSE	5.87e-05	0.00219114	16.1436	-4.97886	NA	NA	NA	NA	NA	NA	NA	NA	NA
MPC	MPC_to_LMP	Rpl36a	FALSE	5.92e-05	0.00220588	16.1277	1.06993	NA	NA	NA	NA	NA	NA	NA	NA	NA
MPC	MPC_to_LMP	Rab11a	FALSE	5.97e-05	0.00221719	16.1118	1.90855	NA	NA	NA	NA	NA	NA	NA	NA	NA
MPC	MPC_to_LMP	Ywhab	FALSE	5.98e-05	0.00221719	16.1098	1.52179	NA	NA	NA	NA	NA	NA	NA	NA	NA
MPC	MPC_to_LMP	Glrx	FALSE	5.98e-05	0.00221719	16.1079	3.235	NA	NA	NA	NA	NA	NA	NA	NA	NA
MPC	MPC_to_LMP	Actl6a	FALSE	5.99e-05	0.00221719	16.1051	2.91239	NA	NA	NA	NA	NA	NA	NA	NA	NA
MPC	MPC_to_LMP	Bri3	FALSE	6.08e-05	0.00224691	16.0767	1.52952	NA	NA	NA	NA	NA	NA	NA	NA	NA
MPC	MPC_to_LMP	Exosc1	FALSE	6.12e-05	0.00225802	16.0642	3.00246	NA	NA	NA	NA	NA	NA	NA	NA	NA
MPC	MPC_to_LMP	Smyd2	FALSE	6.23e-05	0.00229344	16.0307	2.1485	NA	NA	NA	NA	NA	NA	NA	NA	NA
MPC	MPC_to_LMP	Ppp2r2a	FALSE	6.25e-05	0.00229344	16.0263	2.1819	NA	NA	NA	NA	NA	NA	NA	NA	NA
MPC	MPC_to_LMP	Smu1	FALSE	6.25e-05	0.00229344	16.0251	2.40763	NA	NA	NA	NA	NA	NA	NA	NA	NA
MPC	MPC_to_LMP	Caprin1	FALSE	6.35e-05	0.0023235	15.9964	1.88664	NA	NA	NA	NA	NA	NA	NA	NA	NA
MPC	MPC_to_LMP	Car12	FALSE	6.35e-05	0.0023235	15.9941	-2.45061	NA	NA	NA	NA	NA	NA	NA	NA	NA
MPC	MPC_to_LMP	Utp14a	FALSE	6.37e-05	0.00232554	15.9893	2.92953	NA	NA	NA	NA	NA	NA	NA	NA	NA
MPC	MPC_to_LMP	Fkbp1a	FALSE	6.46e-05	0.00235269	15.9642	1.30678	NA	NA	NA	NA	NA	NA	NA	NA	NA
MPC	MPC_to_LMP	Enpp1	FALSE	6.57e-05	0.00238997	15.9312	5.68262	NA	NA	NA	NA	NA	NA	NA	NA	NA
MPC	MPC_to_LMP	1110008P14Rik	FALSE	6.7e-05	0.00243446	15.8932	2.38957	NA	NA	NA	NA	NA	NA	NA	NA	NA
MPC	MPC_to_LMP	Irgc1	FALSE	6.72e-05	0.00243848	15.8869	1.74779	NA	NA	NA	NA	NA	NA	NA	NA	NA
MPC	MPC_to_LMP	Mrpl13	FALSE	6.77e-05	0.00245048	15.8745	1.71759	NA	NA	NA	NA	NA	NA	NA	NA	NA
MPC	MPC_to_LMP	Rap2b	FALSE	6.78e-05	0.00245144	15.8706	4.12192	NA	NA	NA	NA	NA	NA	NA	NA	NA
MPC	MPC_to_LMP	Hmga1	FALSE	6.8e-05	0.00245233	15.8668	12.1616	NA	NA	NA	NA	NA	NA	NA	NA	NA
MPC	MPC_to_LMP	Arrdc4	FALSE	7.01e-05	0.00252671	15.8071	3.1267	NA	NA	NA	NA	NA	NA	NA	NA	NA
MPC	MPC_to_LMP	Gm28723	FALSE	7.05e-05	0.0025361	15.7964	1.34593	NA	NA	NA	NA	NA	NA	NA	NA	NA
MPC	MPC_to_LMP	Sgta	FALSE	7.06e-05	0.0025361	15.7939	1.81657	NA	NA	NA	NA	NA	NA	NA	NA	NA
MPC	MPC_to_LMP	Adgre5	FALSE	7.08e-05	0.00253659	15.7904	5.35363	NA	NA	NA	NA	NA	NA	NA	NA	NA
MPC	MPC_to_LMP	Zranb2	FALSE	7.11e-05	0.00254359	15.7821	2.15254	NA	NA	NA	NA	NA	NA	NA	NA	NA
MPC	MPC_to_LMP	A930033H14Rik	FALSE	7.18e-05	0.00256604	15.7624	0.857024	NA	NA	NA	NA	NA	NA	NA	NA	NA
MPC	MPC_to_LMP	Atxn10	FALSE	7.24e-05	0.00258391	15.7461	1.78889	NA	NA	NA	NA	NA	NA	NA	NA	NA
MPC	MPC_to_LMP	Znhit6	FALSE	7.32e-05	0.00260774	15.7257	3.1719	NA	NA	NA	NA	NA	NA	NA	NA	NA
MPC	MPC_to_LMP	Rrs1	FALSE	7.43e-05	0.00264153	15.6982	3.12127	NA	NA	NA	NA	NA	NA	NA	NA	NA
MPC	MPC_to_LMP	Rpf1	FALSE	7.62e-05	0.00270465	15.6505	2.80013	NA	NA	NA	NA	NA	NA	NA	NA	NA
MPC	MPC_to_LMP	Chordc1	FALSE	7.78e-05	0.00275413	15.6102	2.77464	NA	NA	NA	NA	NA	NA	NA	NA	NA
MPC	MPC_to_LMP	Mpp6	FALSE	7.8e-05	0.00275413	15.6052	2.86389	NA	NA	NA	NA	NA	NA	NA	NA	NA
MPC	MPC_to_LMP	Grem2	FALSE	7.81e-05	0.00275413	15.6045	12.6297	NA	NA	NA	NA	NA	NA	NA	NA	NA
MPC	MPC_to_LMP	Mat2a	FALSE	7.81e-05	0.00275413	15.604	2.07077	NA	NA	NA	NA	NA	NA	NA	NA	NA
MPC	MPC_to_LMP	Coa3	FALSE	7.88e-05	0.00277541	15.5863	1.72401	NA	NA	NA	NA	NA	NA	NA	NA	NA
MPC	MPC_to_LMP	Mrpl50	FALSE	7.92e-05	0.00278254	15.5784	2.25111	NA	NA	NA	NA	NA	NA	NA	NA	NA
MPC	MPC_to_LMP	Ssb	FALSE	7.98e-05	0.00280119	15.5628	1.50808	NA	NA	NA	NA	NA	NA	NA	NA	NA
MPC	MPC_to_LMP	Psmb4	FALSE	8.01e-05	0.00280366	15.5565	1.34504	NA	NA	NA	NA	NA	NA	NA	NA	NA
MPC	MPC_to_LMP	Rab21	FALSE	8.02e-05	0.00280366	15.5536	1.91918	NA	NA	NA	NA	NA	NA	NA	NA	NA
MPC	MPC_to_LMP	Rpl30	FALSE	8.03e-05	0.00280366	15.552	1.04088	NA	NA	NA	NA	NA	NA	NA	NA	NA
MPC	MPC_to_LMP	Vcan	FALSE	8.06e-05	0.00281111	15.544	6.48496	NA	NA	NA	NA	NA	NA	NA	NA	NA
MPC	MPC_to_LMP	Tubb4b	FALSE	8.12e-05	0.00282744	15.53	2.19686	NA	NA	NA	NA	NA	NA	NA	NA	NA
MPC	MPC_to_LMP	Cdc5l	FALSE	8.15e-05	0.00282935	15.5237	2.18195	NA	NA	NA	NA	NA	NA	NA	NA	NA
MPC	MPC_to_LMP	Ywhaq	FALSE	8.16e-05	0.00282935	15.5218	1.49125	NA	NA	NA	NA	NA	NA	NA	NA	NA
MPC	MPC_to_LMP	AI413582	FALSE	8.16e-05	0.00282935	15.5197	3.66194	NA	NA	NA	NA	NA	NA	NA	NA	NA
MPC	MPC_to_LMP	Podnl1	FALSE	8.2e-05	0.00283776	15.5111	3.31274	NA	NA	NA	NA	NA	NA	NA	NA	NA
MPC	MPC_to_LMP	Ppp2r5d	FALSE	8.31e-05	0.00286874	15.4873	2.97184	NA	NA	NA	NA	NA	NA	NA	NA	NA
MPC	MPC_to_LMP	Ywhaz	FALSE	8.32e-05	0.00286874	15.4846	1.36829	NA	NA	NA	NA	NA	NA	NA	NA	NA
MPC	MPC_to_LMP	Foxs1	FALSE	8.42e-05	0.00290083	15.4606	4.96273	NA	NA	NA	NA	NA	NA	NA	NA	NA
MPC	MPC_to_LMP	Etv4	FALSE	8.54e-05	0.00293721	15.4341	8.72719	NA	NA	NA	NA	NA	NA	NA	NA	NA
MPC	MPC_to_LMP	Homer3	FALSE	8.57e-05	0.00294171	15.4282	4.49743	NA	NA	NA	NA	NA	NA	NA	NA	NA
MPC	MPC_to_LMP	Gsto1	FALSE	8.67e-05	0.00297187	15.4059	2.39469	NA	NA	NA	NA	NA	NA	NA	NA	NA
MPC	MPC_to_LMP	Bid	FALSE	8.69e-05	0.00297443	15.4013	4.3063	NA	NA	NA	NA	NA	NA	NA	NA	NA
MPC	MPC_to_LMP	Kazald1	FALSE	9.03e-05	0.00308356	15.3303	-2.20357	NA	NA	NA	NA	NA	NA	NA	NA	NA
MPC	MPC_to_LMP	Dut	FALSE	9.15e-05	0.00312162	15.3042	3.15023	NA	NA	NA	NA	NA	NA	NA	NA	NA
MPC	MPC_to_LMP	P3h1	FALSE	9.26e-05	0.00315488	15.2812	-1.67542	NA	NA	NA	NA	NA	NA	NA	NA	NA
MPC	MPC_to_LMP	G3bp2	FALSE	9.4e-05	0.00319538	15.2542	1.97742	NA	NA	NA	NA	NA	NA	NA	NA	NA
MPC	MPC_to_LMP	Fkbp11	FALSE	9.45e-05	0.00320923	15.2431	-1.39764	NA	NA	NA	NA	NA	NA	NA	NA	NA
MPC	MPC_to_LMP	Ash2l	FALSE	9.69e-05	0.00328562	15.1957	2.81363	NA	NA	NA	NA	NA	NA	NA	NA	NA
MPC	MPC_to_LMP	Brix1	FALSE	9.72e-05	0.00329025	15.1901	2.28071	NA	NA	NA	NA	NA	NA	NA	NA	NA
MPC	MPC_to_LMP	Rps7	FALSE	9.74e-05	0.003291	15.1868	1.0427	NA	NA	NA	NA	NA	NA	NA	NA	NA
MPC	MPC_to_LMP	Bak1	FALSE	9.77e-05	0.00329602	15.181	2.96179	NA	NA	NA	NA	NA	NA	NA	NA	NA
MPC	MPC_to_LMP	Rasgef1a	FALSE	9.89e-05	0.00332959	15.1571	0.961714	NA	NA	NA	NA	NA	NA	NA	NA	NA
MPC	MPC_to_LMP	Gtf2f1	FALSE	9.9e-05	0.00332959	15.156	2.88819	NA	NA	NA	NA	NA	NA	NA	NA	NA
MPC	MPC_to_LMP	Ripk3	FALSE	0.000100745	0.00338364	15.1227	3.05219	NA	NA	NA	NA	NA	NA	NA	NA	NA
MPC	MPC_to_LMP	Plp2	FALSE	0.000101067	0.00338922	15.1167	2.23502	NA	NA	NA	NA	NA	NA	NA	NA	NA
MPC	MPC_to_LMP	Gprc5c	FALSE	0.000102446	0.00342274	15.0911	-2.0067	NA	NA	NA	NA	NA	NA	NA	NA	NA
MPC	MPC_to_LMP	Thoc5	FALSE	0.000102514	0.00342274	15.0898	3.57636	NA	NA	NA	NA	NA	NA	NA	NA	NA
MPC	MPC_to_LMP	Rps5	FALSE	0.000102536	0.00342274	15.0894	1.03444	NA	NA	NA	NA	NA	NA	NA	NA	NA
MPC	MPC_to_LMP	Gsk3b	FALSE	0.00010285	0.00342795	15.0837	1.70959	NA	NA	NA	NA	NA	NA	NA	NA	NA
MPC	MPC_to_LMP	Lims1	FALSE	0.000104441	0.00347568	15.0547	2.14657	NA	NA	NA	NA	NA	NA	NA	NA	NA
MPC	MPC_to_LMP	Tes	FALSE	0.000104664	0.00347782	15.0506	4.25325	NA	NA	NA	NA	NA	NA	NA	NA	NA
MPC	MPC_to_LMP	Otub1	FALSE	0.000106832	0.00354447	15.012	2.09234	NA	NA	NA	NA	NA	NA	NA	NA	NA
MPC	MPC_to_LMP	Rpl8	FALSE	0.00010722	0.00355194	15.0051	0.965008	NA	NA	NA	NA	NA	NA	NA	NA	NA
MPC	MPC_to_LMP	Vps72	FALSE	0.000107724	0.00355978	14.9963	2.74705	NA	NA	NA	NA	NA	NA	NA	NA	NA
MPC	MPC_to_LMP	Ube2l3	FALSE	0.000107783	0.00355978	14.9952	1.42074	NA	NA	NA	NA	NA	NA	NA	NA	NA
MPC	MPC_to_LMP	Hmgn1	FALSE	0.000108934	0.00359236	14.9752	1.2658	NA	NA	NA	NA	NA	NA	NA	NA	NA
MPC	MPC_to_LMP	Eif5	FALSE	0.000109824	0.00360951	14.9598	1.38702	NA	NA	NA	NA	NA	NA	NA	NA	NA
MPC	MPC_to_LMP	Cdk6	FALSE	0.000109855	0.00360951	14.9593	3.17445	NA	NA	NA	NA	NA	NA	NA	NA	NA
MPC	MPC_to_LMP	Nsun2	FALSE	0.00010995	0.00360951	14.9577	2.39843	NA	NA	NA	NA	NA	NA	NA	NA	NA
MPC	MPC_to_LMP	Maz	FALSE	0.000112716	0.00369475	14.9108	2.60709	NA	NA	NA	NA	NA	NA	NA	NA	NA
MPC	MPC_to_LMP	St6galnac4	FALSE	0.000113739	0.0037227	14.8938	1.95216	NA	NA	NA	NA	NA	NA	NA	NA	NA
MPC	MPC_to_LMP	Hsd17b12	FALSE	0.00011622	0.00379821	14.853	2.11549	NA	NA	NA	NA	NA	NA	NA	NA	NA
MPC	MPC_to_LMP	Dtna	FALSE	0.000117288	0.00382739	14.8358	-3.20886	NA	NA	NA	NA	NA	NA	NA	NA	NA
MPC	MPC_to_LMP	Mrpl30	FALSE	0.000117593	0.0038316	14.8309	1.42741	NA	NA	NA	NA	NA	NA	NA	NA	NA
MPC	MPC_to_LMP	S100b	FALSE	0.000120803	0.00393034	14.7801	5.48539	NA	NA	NA	NA	NA	NA	NA	NA	NA
MPC	MPC_to_LMP	Rbm25	FALSE	0.000121125	0.00393495	14.7751	1.6992	NA	NA	NA	NA	NA	NA	NA	NA	NA
MPC	MPC_to_LMP	Cops5	FALSE	0.000121421	0.0039387	14.7705	1.97579	NA	NA	NA	NA	NA	NA	NA	NA	NA
MPC	MPC_to_LMP	Tmem183a	FALSE	0.000122654	0.00397278	14.7514	2.68194	NA	NA	NA	NA	NA	NA	NA	NA	NA
MPC	MPC_to_LMP	S100a4	FALSE	0.000123227	0.00398542	14.7427	2.58862	NA	NA	NA	NA	NA	NA	NA	NA	NA
MPC	MPC_to_LMP	Bmp2	FALSE	0.000124239	0.00400942	14.7272	3.12545	NA	NA	NA	NA	NA	NA	NA	NA	NA
MPC	MPC_to_LMP	Slc38a10	FALSE	0.000124336	0.00400942	14.7258	-1.64451	NA	NA	NA	NA	NA	NA	NA	NA	NA
MPC	MPC_to_LMP	Pabpc1	FALSE	0.000124844	0.00401987	14.7181	1.25785	NA	NA	NA	NA	NA	NA	NA	NA	NA
MPC	MPC_to_LMP	Usp39	FALSE	0.000125238	0.0040239	14.7121	3.11069	NA	NA	NA	NA	NA	NA	NA	NA	NA
MPC	MPC_to_LMP	Mlip	FALSE	0.000125338	0.0040239	14.7106	-4.00427	NA	NA	NA	NA	NA	NA	NA	NA	NA
MPC	MPC_to_LMP	2310061I04Rik	FALSE	0.000128419	0.00411291	14.6648	5.56966	NA	NA	NA	NA	NA	NA	NA	NA	NA
MPC	MPC_to_LMP	Unc119	FALSE	0.000128487	0.00411291	14.6638	3.67365	NA	NA	NA	NA	NA	NA	NA	NA	NA
MPC	MPC_to_LMP	Pycr1	FALSE	0.000128879	0.0041194	14.6581	-2.31274	NA	NA	NA	NA	NA	NA	NA	NA	NA
MPC	MPC_to_LMP	Pdlim4	FALSE	0.00013056	0.00416704	14.6337	2.53737	NA	NA	NA	NA	NA	NA	NA	NA	NA
MPC	MPC_to_LMP	Rab23	FALSE	0.000131584	0.00419359	14.619	4.27729	NA	NA	NA	NA	NA	NA	NA	NA	NA
MPC	MPC_to_LMP	Ppp2ca	FALSE	0.000135369	0.0043043	14.5655	1.56268	NA	NA	NA	NA	NA	NA	NA	NA	NA
MPC	MPC_to_LMP	Snrpd2	FALSE	0.000135452	0.0043043	14.5644	1.22481	NA	NA	NA	NA	NA	NA	NA	NA	NA
MPC	MPC_to_LMP	Utp3	FALSE	0.000135848	0.00431061	14.5589	2.31407	NA	NA	NA	NA	NA	NA	NA	NA	NA
MPC	MPC_to_LMP	Csnk1g1	FALSE	0.000137205	0.00434735	14.5401	2.78198	NA	NA	NA	NA	NA	NA	NA	NA	NA
MPC	MPC_to_LMP	Slc13a5	FALSE	0.000137601	0.00435358	14.5347	-1.95789	NA	NA	NA	NA	NA	NA	NA	NA	NA
MPC	MPC_to_LMP	Aasdhppt	FALSE	0.000139233	0.00439603	14.5125	2.50182	NA	NA	NA	NA	NA	NA	NA	NA	NA
MPC	MPC_to_LMP	Snrpf	FALSE	0.000139346	0.00439603	14.511	1.44999	NA	NA	NA	NA	NA	NA	NA	NA	NA
MPC	MPC_to_LMP	Tcof1	FALSE	0.000140664	0.00443123	14.4932	3.22995	NA	NA	NA	NA	NA	NA	NA	NA	NA
MPC	MPC_to_LMP	Zfr	FALSE	0.000141676	0.00445666	14.4797	2.3819	NA	NA	NA	NA	NA	NA	NA	NA	NA
MPC	MPC_to_LMP	Thumpd3	FALSE	0.000142775	0.00448477	14.4652	3.23982	NA	NA	NA	NA	NA	NA	NA	NA	NA
MPC	MPC_to_LMP	Ddit3	FALSE	0.000143018	0.00448597	14.462	2.08588	NA	NA	NA	NA	NA	NA	NA	NA	NA
MPC	MPC_to_LMP	Aimp1	FALSE	0.000143557	0.00449641	14.4549	1.47267	NA	NA	NA	NA	NA	NA	NA	NA	NA
MPC	MPC_to_LMP	Hdlbp	FALSE	0.000144498	0.00451939	14.4426	-1.22075	NA	NA	NA	NA	NA	NA	NA	NA	NA
MPC	MPC_to_LMP	Rpl6	FALSE	0.00014493	0.00452643	14.437	0.943847	NA	NA	NA	NA	NA	NA	NA	NA	NA
MPC	MPC_to_LMP	Tcea1	FALSE	0.000145171	0.00452747	14.4338	1.63334	NA	NA	NA	NA	NA	NA	NA	NA	NA
MPC	MPC_to_LMP	Vcam1	FALSE	0.000146303	0.0045516	14.4192	3.4768	NA	NA	NA	NA	NA	NA	NA	NA	NA
MPC	MPC_to_LMP	U2surp	FALSE	0.000146362	0.0045516	14.4184	1.56793	NA	NA	NA	NA	NA	NA	NA	NA	NA
MPC	MPC_to_LMP	Psmd12	FALSE	0.000146697	0.00455555	14.4141	1.92137	NA	NA	NA	NA	NA	NA	NA	NA	NA
MPC	MPC_to_LMP	Adgrd1	FALSE	0.000147831	0.00458422	14.3996	-2.53488	NA	NA	NA	NA	NA	NA	NA	NA	NA
MPC	MPC_to_LMP	Abcf1	FALSE	0.000149598	0.00463244	14.3773	1.97138	NA	NA	NA	NA	NA	NA	NA	NA	NA
MPC	MPC_to_LMP	Syncrip	FALSE	0.000151862	0.00469588	14.349	1.69949	NA	NA	NA	NA	NA	NA	NA	NA	NA
MPC	MPC_to_LMP	Impa1	FALSE	0.00015233	0.00470369	14.3432	2.73423	NA	NA	NA	NA	NA	NA	NA	NA	NA
MPC	MPC_to_LMP	Smn1	FALSE	0.000153781	0.00474181	14.3253	2.83793	NA	NA	NA	NA	NA	NA	NA	NA	NA
MPC	MPC_to_LMP	Ppil3	FALSE	0.000155236	0.0047799	14.3076	2.78702	NA	NA	NA	NA	NA	NA	NA	NA	NA
MPC	MPC_to_LMP	Ptges	FALSE	0.000156363	0.00480783	14.294	5.20793	NA	NA	NA	NA	NA	NA	NA	NA	NA
MPC	MPC_to_LMP	Snrpc	FALSE	0.000156812	0.00481085	14.2886	1.53529	NA	NA	NA	NA	NA	NA	NA	NA	NA
MPC	MPC_to_LMP	Mcc	FALSE	0.000156902	0.00481085	14.2875	6.47953	NA	NA	NA	NA	NA	NA	NA	NA	NA
MPC	MPC_to_LMP	Exosc7	FALSE	0.000158536	0.00485414	14.268	2.88467	NA	NA	NA	NA	NA	NA	NA	NA	NA
MPC	MPC_to_LMP	Cyb5r3	FALSE	0.000158953	0.00486007	14.2631	1.75857	NA	NA	NA	NA	NA	NA	NA	NA	NA
MPC	MPC_to_LMP	Ddx10	FALSE	0.000161064	0.00491775	14.2382	3.32201	NA	NA	NA	NA	NA	NA	NA	NA	NA
MPC	MPC_to_LMP	Mrpl34	FALSE	0.000162977	0.00496921	14.216	1.73718	NA	NA	NA	NA	NA	NA	NA	NA	NA
MPC	MPC_to_LMP	0610012G03Rik	FALSE	0.000163706	0.00498447	14.2076	1.51837	NA	NA	NA	NA	NA	NA	NA	NA	NA
MPC	MPC_to_LMP	Cdkn1a	FALSE	0.000163994	0.00498628	14.2043	1.3544	NA	NA	NA	NA	NA	NA	NA	NA	NA
MPC	MPC_to_LMP	Ube2d1	FALSE	0.000165229	0.00501685	14.1902	3.13985	NA	NA	NA	NA	NA	NA	NA	NA	NA
MPC	MPC_to_LMP	Phax	FALSE	0.000167046	0.00506497	14.1696	2.20449	NA	NA	NA	NA	NA	NA	NA	NA	NA
MPC	MPC_to_LMP	Slc48a1	FALSE	0.000167958	0.00508556	14.1594	2.10013	NA	NA	NA	NA	NA	NA	NA	NA	NA
MPC	MPC_to_LMP	Rassf1	FALSE	0.000169909	0.00513094	14.1376	2.0408	NA	NA	NA	NA	NA	NA	NA	NA	NA
MPC	MPC_to_LMP	Rps24	FALSE	0.000169927	0.00513094	14.1375	1.03181	NA	NA	NA	NA	NA	NA	NA	NA	NA
MPC	MPC_to_LMP	Nfu1	FALSE	0.000173503	0.00523169	14.0983	2.06625	NA	NA	NA	NA	NA	NA	NA	NA	NA
MPC	MPC_to_LMP	Rab5c	FALSE	0.000175766	0.00529262	14.0739	1.68444	NA	NA	NA	NA	NA	NA	NA	NA	NA
MPC	MPC_to_LMP	Slc27a3	FALSE	0.000176382	0.00530385	14.0673	-2.65637	NA	NA	NA	NA	NA	NA	NA	NA	NA
MPC	MPC_to_LMP	Gpatch4	FALSE	0.000177353	0.00532328	14.057	3.31867	NA	NA	NA	NA	NA	NA	NA	NA	NA
MPC	MPC_to_LMP	Dok1	FALSE	0.000177683	0.00532328	14.0535	3.71767	NA	NA	NA	NA	NA	NA	NA	NA	NA
MPC	MPC_to_LMP	Rbm28	FALSE	0.00017776	0.00532328	14.0527	2.58766	NA	NA	NA	NA	NA	NA	NA	NA	NA
MPC	MPC_to_LMP	Smim15	FALSE	0.000179664	0.00536743	14.0326	2.56079	NA	NA	NA	NA	NA	NA	NA	NA	NA
MPC	MPC_to_LMP	Dcaf7	FALSE	0.000179726	0.00536743	14.032	2.53698	NA	NA	NA	NA	NA	NA	NA	NA	NA
MPC	MPC_to_LMP	Comt	FALSE	0.000180951	0.00539665	14.0192	1.95321	NA	NA	NA	NA	NA	NA	NA	NA	NA
MPC	MPC_to_LMP	Ttc28	FALSE	0.000182153	0.00542509	14.0068	2.96794	NA	NA	NA	NA	NA	NA	NA	NA	NA
MPC	MPC_to_LMP	Prpf38a	FALSE	0.000183397	0.00545467	13.994	2.3302	NA	NA	NA	NA	NA	NA	NA	NA	NA
MPC	MPC_to_LMP	Naa15	FALSE	0.000183795	0.00545908	13.9899	2.40256	NA	NA	NA	NA	NA	NA	NA	NA	NA
MPC	MPC_to_LMP	Ino80e	FALSE	0.000185143	0.00549165	13.9762	2.57268	NA	NA	NA	NA	NA	NA	NA	NA	NA
MPC	MPC_to_LMP	mt-Co3	FALSE	0.000186149	0.005514	13.966	1.0071	NA	NA	NA	NA	NA	NA	NA	NA	NA
MPC	MPC_to_LMP	Rpl4	FALSE	0.000188658	0.00558075	13.9408	1.04202	NA	NA	NA	NA	NA	NA	NA	NA	NA
MPC	MPC_to_LMP	Rangap1	FALSE	0.000191187	0.00564791	13.9158	3.21942	NA	NA	NA	NA	NA	NA	NA	NA	NA
MPC	MPC_to_LMP	Fam69b	FALSE	0.000191962	0.00566314	13.9082	5.28926	NA	NA	NA	NA	NA	NA	NA	NA	NA
MPC	MPC_to_LMP	Ext1	FALSE	0.000192749	0.00567868	13.9005	2.62497	NA	NA	NA	NA	NA	NA	NA	NA	NA
MPC	MPC_to_LMP	Rhoc	FALSE	0.000195073	0.0057394	13.878	1.47522	NA	NA	NA	NA	NA	NA	NA	NA	NA
MPC	MPC_to_LMP	Emp2	FALSE	0.000198163	0.00581658	13.8484	2.09136	NA	NA	NA	NA	NA	NA	NA	NA	NA
MPC	MPC_to_LMP	Rpl7a	FALSE	0.000198229	0.00581658	13.8478	0.994497	NA	NA	NA	NA	NA	NA	NA	NA	NA
MPC	MPC_to_LMP	Slc25a39	FALSE	0.000201914	0.00591676	13.8132	1.74823	NA	NA	NA	NA	NA	NA	NA	NA	NA
MPC	MPC_to_LMP	Esf1	FALSE	0.000202631	0.0059298	13.8065	1.66097	NA	NA	NA	NA	NA	NA	NA	NA	NA
MPC	MPC_to_LMP	Antxr1	FALSE	0.000203742	0.00595434	13.7963	2.41469	NA	NA	NA	NA	NA	NA	NA	NA	NA
MPC	MPC_to_LMP	Nol11	FALSE	0.000205504	0.00599092	13.7801	2.30049	NA	NA	NA	NA	NA	NA	NA	NA	NA
MPC	MPC_to_LMP	Zc3h15	FALSE	0.000205542	0.00599092	13.7797	1.50163	NA	NA	NA	NA	NA	NA	NA	NA	NA
MPC	MPC_to_LMP	Bcl7c	FALSE	0.000208702	0.00607227	13.7511	1.89417	NA	NA	NA	NA	NA	NA	NA	NA	NA
MPC	MPC_to_LMP	Basp1	FALSE	0.00020889	0.00607227	13.7494	2.06994	NA	NA	NA	NA	NA	NA	NA	NA	NA
MPC	MPC_to_LMP	Kti12	FALSE	0.000210649	0.00611527	13.7336	3.07815	NA	NA	NA	NA	NA	NA	NA	NA	NA
MPC	MPC_to_LMP	Ebna1bp2	FALSE	0.000211324	0.00612369	13.7276	1.93801	NA	NA	NA	NA	NA	NA	NA	NA	NA
MPC	MPC_to_LMP	Gmps	FALSE	0.0002115	0.00612369	13.7261	2.19153	NA	NA	NA	NA	NA	NA	NA	NA	NA
MPC	MPC_to_LMP	Prpf19	FALSE	0.000214479	0.00620171	13.6998	1.8917	NA	NA	NA	NA	NA	NA	NA	NA	NA
MPC	MPC_to_LMP	Surf4	FALSE	0.000214793	0.00620257	13.697	-1.20539	NA	NA	NA	NA	NA	NA	NA	NA	NA
MPC	MPC_to_LMP	Edem1	FALSE	0.000217264	0.00626565	13.6756	-1.75102	NA	NA	NA	NA	NA	NA	NA	NA	NA
MPC	MPC_to_LMP	Nop14	FALSE	0.000218433	0.00629105	13.6655	2.83813	NA	NA	NA	NA	NA	NA	NA	NA	NA
MPC	MPC_to_LMP	Zcchc24	FALSE	0.00022038	0.00633876	13.6488	3.09837	NA	NA	NA	NA	NA	NA	NA	NA	NA
MPC	MPC_to_LMP	Kpnb1	FALSE	0.000223302	0.00640734	13.6241	1.95738	NA	NA	NA	NA	NA	NA	NA	NA	NA
MPC	MPC_to_LMP	Cdc34	FALSE	0.000223351	0.00640734	13.6237	2.16365	NA	NA	NA	NA	NA	NA	NA	NA	NA
MPC	MPC_to_LMP	Ptgr1	FALSE	0.00022406	0.00641924	13.6177	3.17962	NA	NA	NA	NA	NA	NA	NA	NA	NA
MPC	MPC_to_LMP	Rpl35a	FALSE	0.000226569	0.00648261	13.5968	0.936346	NA	NA	NA	NA	NA	NA	NA	NA	NA
MPC	MPC_to_LMP	Etfb	FALSE	0.000230171	0.00657704	13.5672	1.49549	NA	NA	NA	NA	NA	NA	NA	NA	NA
MPC	MPC_to_LMP	Adprh	FALSE	0.000233592	0.00666606	13.5395	2.08841	NA	NA	NA	NA	NA	NA	NA	NA	NA
MPC	MPC_to_LMP	Emc6	FALSE	0.000235488	0.00671141	13.5243	1.6127	NA	NA	NA	NA	NA	NA	NA	NA	NA
MPC	MPC_to_LMP	Mrps35	FALSE	0.000235864	0.00671337	13.5214	2.35576	NA	NA	NA	NA	NA	NA	NA	NA	NA
MPC	MPC_to_LMP	Rpl24	FALSE	0.000244314	0.00694482	13.4553	0.919001	NA	NA	NA	NA	NA	NA	NA	NA	NA
MPC	MPC_to_LMP	Celf4	FALSE	0.000246214	0.00698972	13.4408	7.71213	NA	NA	NA	NA	NA	NA	NA	NA	NA
MPC	MPC_to_LMP	Aig1	FALSE	0.000250171	0.00709282	13.4109	3.67191	NA	NA	NA	NA	NA	NA	NA	NA	NA
MPC	MPC_to_LMP	Pstk	FALSE	0.00025057	0.00709494	13.4079	2.91463	NA	NA	NA	NA	NA	NA	NA	NA	NA
MPC	MPC_to_LMP	Zfp428	FALSE	0.000254819	0.0072059	13.3763	3.30558	NA	NA	NA	NA	NA	NA	NA	NA	NA
MPC	MPC_to_LMP	Pard3	FALSE	0.000256117	0.00722685	13.3668	2.34198	NA	NA	NA	NA	NA	NA	NA	NA	NA
MPC	MPC_to_LMP	Fbln5	FALSE	0.000256222	0.00722685	13.366	2.53636	NA	NA	NA	NA	NA	NA	NA	NA	NA
MPC	MPC_to_LMP	Rin2	FALSE	0.000256951	0.00723807	13.3607	3.03251	NA	NA	NA	NA	NA	NA	NA	NA	NA
MPC	MPC_to_LMP	Hspa4	FALSE	0.000262878	0.00739547	13.3179	1.92093	NA	NA	NA	NA	NA	NA	NA	NA	NA
MPC	MPC_to_LMP	Coprs	FALSE	0.000266885	0.00749854	13.2896	3.33987	NA	NA	NA	NA	NA	NA	NA	NA	NA
MPC	MPC_to_LMP	Inhba	FALSE	0.000270381	0.0075718	13.2652	3.38215	NA	NA	NA	NA	NA	NA	NA	NA	NA
MPC	MPC_to_LMP	Mrpl42	FALSE	0.000270409	0.0075718	13.265	1.70763	NA	NA	NA	NA	NA	NA	NA	NA	NA
MPC	MPC_to_LMP	Naa50	FALSE	0.000270533	0.0075718	13.2641	1.69584	NA	NA	NA	NA	NA	NA	NA	NA	NA
MPC	MPC_to_LMP	Plin2	FALSE	0.000271013	0.00757554	13.2608	2.31728	NA	NA	NA	NA	NA	NA	NA	NA	NA
MPC	MPC_to_LMP	Exosc8	FALSE	0.000271904	0.0075907	13.2547	2.63212	NA	NA	NA	NA	NA	NA	NA	NA	NA
MPC	MPC_to_LMP	Taf1d	FALSE	0.000272374	0.00759413	13.2514	1.86937	NA	NA	NA	NA	NA	NA	NA	NA	NA
MPC	MPC_to_LMP	Slc25a37	FALSE	0.000274165	0.0076343	13.2391	4.27039	NA	NA	NA	NA	NA	NA	NA	NA	NA
MPC	MPC_to_LMP	Rpl5	FALSE	0.000279104	0.00775683	13.2057	1.02538	NA	NA	NA	NA	NA	NA	NA	NA	NA
MPC	MPC_to_LMP	Rack1	FALSE	0.000279276	0.00775683	13.2045	0.988219	NA	NA	NA	NA	NA	NA	NA	NA	NA
MPC	MPC_to_LMP	Ei24	FALSE	0.000279858	0.00776312	13.2006	2.11823	NA	NA	NA	NA	NA	NA	NA	NA	NA
MPC	MPC_to_LMP	Atp5f1	FALSE	0.000281314	0.0077936	13.1909	1.14505	NA	NA	NA	NA	NA	NA	NA	NA	NA
MPC	MPC_to_LMP	Smad4	FALSE	0.00028347	0.0078434	13.1766	1.77254	NA	NA	NA	NA	NA	NA	NA	NA	NA
MPC	MPC_to_LMP	Fbxo22	FALSE	0.000284404	0.00785928	13.1704	2.72237	NA	NA	NA	NA	NA	NA	NA	NA	NA
MPC	MPC_to_LMP	Ldah	FALSE	0.000284982	0.00786528	13.1666	2.56339	NA	NA	NA	NA	NA	NA	NA	NA	NA
MPC	MPC_to_LMP	Lsm2	FALSE	0.000285802	0.00787796	13.1612	2.17216	NA	NA	NA	NA	NA	NA	NA	NA	NA
MPC	MPC_to_LMP	Ndn	FALSE	0.000286966	0.00789089	13.1536	4.67815	NA	NA	NA	NA	NA	NA	NA	NA	NA
MPC	MPC_to_LMP	Psma7	FALSE	0.000287159	0.00789089	13.1524	1.25148	NA	NA	NA	NA	NA	NA	NA	NA	NA
MPC	MPC_to_LMP	Rad50	FALSE	0.000287355	0.00789089	13.1511	3.63311	NA	NA	NA	NA	NA	NA	NA	NA	NA
MPC	MPC_to_LMP	Mrpl43	FALSE	0.000287874	0.00789519	13.1477	1.83832	NA	NA	NA	NA	NA	NA	NA	NA	NA
MPC	MPC_to_LMP	Wdr75	FALSE	0.000288936	0.00791438	13.1408	2.51705	NA	NA	NA	NA	NA	NA	NA	NA	NA
MPC	MPC_to_LMP	Atp5b	FALSE	0.000293413	0.00802694	13.112	1.09384	NA	NA	NA	NA	NA	NA	NA	NA	NA
MPC	MPC_to_LMP	Pafah1b1	FALSE	0.00029508	0.00806244	13.1014	1.43592	NA	NA	NA	NA	NA	NA	NA	NA	NA
MPC	MPC_to_LMP	Enc1	FALSE	0.000295801	0.00807205	13.0968	4.07461	NA	NA	NA	NA	NA	NA	NA	NA	NA
MPC	MPC_to_LMP	Pth1r	FALSE	0.000296643	0.0080849	13.0915	1.38829	NA	NA	NA	NA	NA	NA	NA	NA	NA
MPC	MPC_to_LMP	Frrs1	FALSE	0.000298583	0.00812765	13.0793	3.16615	NA	NA	NA	NA	NA	NA	NA	NA	NA
MPC	MPC_to_LMP	Eif4h	FALSE	0.000300796	0.00817767	13.0654	1.46269	NA	NA	NA	NA	NA	NA	NA	NA	NA
MPC	MPC_to_LMP	2610001J05Rik	FALSE	0.000303035	0.0082283	13.0515	2.49424	NA	NA	NA	NA	NA	NA	NA	NA	NA
MPC	MPC_to_LMP	Tpr	FALSE	0.000304149	0.00824829	13.0447	1.61414	NA	NA	NA	NA	NA	NA	NA	NA	NA
MPC	MPC_to_LMP	Ywhah	FALSE	0.000304949	0.00825973	13.0397	2.09445	NA	NA	NA	NA	NA	NA	NA	NA	NA
MPC	MPC_to_LMP	Baz1b	FALSE	0.00030545	0.00826305	13.0367	2.03093	NA	NA	NA	NA	NA	NA	NA	NA	NA
MPC	MPC_to_LMP	Snx5	FALSE	0.000309862	0.00837202	13.0098	1.80672	NA	NA	NA	NA	NA	NA	NA	NA	NA
MPC	MPC_to_LMP	Fst	FALSE	0.000312183	0.0084243	12.9958	2.04163	NA	NA	NA	NA	NA	NA	NA	NA	NA
MPC	MPC_to_LMP	Commd4	FALSE	0.000312598	0.00842509	12.9934	1.98392	NA	NA	NA	NA	NA	NA	NA	NA	NA
MPC	MPC_to_LMP	Tpbg	FALSE	0.000313915	0.00845017	12.9855	3.57713	NA	NA	NA	NA	NA	NA	NA	NA	NA
MPC	MPC_to_LMP	Vdac3	FALSE	0.000314331	0.00845095	12.983	1.32485	NA	NA	NA	NA	NA	NA	NA	NA	NA
MPC	MPC_to_LMP	Szrd1	FALSE	0.000317727	0.00853173	12.9629	2.21633	NA	NA	NA	NA	NA	NA	NA	NA	NA
MPC	MPC_to_LMP	Ndufa12	FALSE	0.000318132	0.0085321	12.9605	1.34399	NA	NA	NA	NA	NA	NA	NA	NA	NA
MPC	MPC_to_LMP	Igfbp7	FALSE	0.00031867	0.00853278	12.9573	1.67727	NA	NA	NA	NA	NA	NA	NA	NA	NA
MPC	MPC_to_LMP	Ccnh	FALSE	0.000318939	0.00853278	12.9558	2.13365	NA	NA	NA	NA	NA	NA	NA	NA	NA
MPC	MPC_to_LMP	Pcsk6	FALSE	0.000319381	0.00853417	12.9532	-1.90266	NA	NA	NA	NA	NA	NA	NA	NA	NA
MPC	MPC_to_LMP	Rpl37a	FALSE	0.000326772	0.00872098	12.9103	0.893216	NA	NA	NA	NA	NA	NA	NA	NA	NA
MPC	MPC_to_LMP	Aatf	FALSE	0.000329736	0.00878934	12.8934	2.91674	NA	NA	NA	NA	NA	NA	NA	NA	NA
MPC	MPC_to_LMP	Thyn1	FALSE	0.000330271	0.00879287	12.8904	2.08139	NA	NA	NA	NA	NA	NA	NA	NA	NA
MPC	MPC_to_LMP	Chmp2b	FALSE	0.00033184	0.00882388	12.8815	2.18066	NA	NA	NA	NA	NA	NA	NA	NA	NA
MPC	MPC_to_LMP	Mtx2	FALSE	0.000333353	0.00885332	12.873	2.11116	NA	NA	NA	NA	NA	NA	NA	NA	NA
MPC	MPC_to_LMP	Sap30l	FALSE	0.000338104	0.00896858	12.8465	1.94781	NA	NA	NA	NA	NA	NA	NA	NA	NA
MPC	MPC_to_LMP	Arl6ip1	FALSE	0.000339968	0.00900709	12.8363	2.46707	NA	NA	NA	NA	NA	NA	NA	NA	NA
MPC	MPC_to_LMP	Ech1	FALSE	0.00034103	0.00902427	12.8304	1.73303	NA	NA	NA	NA	NA	NA	NA	NA	NA
MPC	MPC_to_LMP	Fkbp4	FALSE	0.000341793	0.00903352	12.8262	1.86896	NA	NA	NA	NA	NA	NA	NA	NA	NA
MPC	MPC_to_LMP	Akirin2	FALSE	0.00034444	0.00909247	12.8118	2.30851	NA	NA	NA	NA	NA	NA	NA	NA	NA
MPC	MPC_to_LMP	Asb11	FALSE	0.000348272	0.00918253	12.7911	2.2183	NA	NA	NA	NA	NA	NA	NA	NA	NA
MPC	MPC_to_LMP	Jpt1	FALSE	0.000349669	0.00920822	12.7836	1.80979	NA	NA	NA	NA	NA	NA	NA	NA	NA
MPC	MPC_to_LMP	Srrm1	FALSE	0.000350139	0.00920949	12.7811	1.50452	NA	NA	NA	NA	NA	NA	NA	NA	NA
MPC	MPC_to_LMP	2210016F16Rik	FALSE	0.000359275	0.00943843	12.7329	2.04366	NA	NA	NA	NA	NA	NA	NA	NA	NA
MPC	MPC_to_LMP	Eea1	FALSE	0.00036142	0.00948336	12.7218	2.42243	NA	NA	NA	NA	NA	NA	NA	NA	NA
MPC	MPC_to_LMP	Eps8	FALSE	0.000370201	0.0097021	12.6769	7.37304	NA	NA	NA	NA	NA	NA	NA	NA	NA
MPC	MPC_to_LMP	Tomm34	FALSE	0.000373717	0.00978252	12.6592	2.62035	NA	NA	NA	NA	NA	NA	NA	NA	NA
MPC	MPC_to_LMP	Ctcf	FALSE	0.000376188	0.00982245	12.6469	2.20753	NA	NA	NA	NA	NA	NA	NA	NA	NA
MPC	MPC_to_LMP	Rpl37	FALSE	0.000376204	0.00982245	12.6468	0.921255	NA	NA	NA	NA	NA	NA	NA	NA	NA
MPC	MPC_to_LMP	Bmp1	FALSE	0.000376592	0.00982245	12.6449	-1.41292	NA	NA	NA	NA	NA	NA	NA	NA	NA
MPC	MPC_to_LMP	AU021092	FALSE	0.000380077	0.00990152	12.6277	-3.90474	NA	NA	NA	NA	NA	NA	NA	NA	NA
MPC	MPC_to_LMP	Kctd12	FALSE	0.000383422	0.00997043	12.6113	3.30325	NA	NA	NA	NA	NA	NA	NA	NA	NA
MPC	MPC_to_LMP	Slpi	FALSE	0.000383636	0.00997043	12.6103	4.05249	NA	NA	NA	NA	NA	NA	NA	NA	NA
MPC	MPC_to_LMP	Ruvbl1	FALSE	0.00038424	0.00997082	12.6073	2.2119	NA	NA	NA	NA	NA	NA	NA	NA	NA
MPC	MPC_to_LMP	Dtnbp1	FALSE	0.000384565	0.00997082	12.6057	2.03692	NA	NA	NA	NA	NA	NA	NA	NA	NA
MPC	MPC_to_LMP	Rbm42	FALSE	0.000389783	0.0100858	12.5805	1.87207	NA	NA	NA	NA	NA	NA	NA	NA	NA
MPC	MPC_to_LMP	Ssna1	FALSE	0.000389925	0.0100858	12.5799	1.6437	NA	NA	NA	NA	NA	NA	NA	NA	NA
MPC	MPC_to_LMP	Mdh2	FALSE	0.000392139	0.01013	12.5693	1.29419	NA	NA	NA	NA	NA	NA	NA	NA	NA
MPC	MPC_to_LMP	Hsph1	FALSE	0.000392821	0.01013	12.566	3.02311	NA	NA	NA	NA	NA	NA	NA	NA	NA
MPC	MPC_to_LMP	Lhfpl2	FALSE	0.000393022	0.01013	12.5651	2.9573	NA	NA	NA	NA	NA	NA	NA	NA	NA
MPC	MPC_to_LMP	Wbp4	FALSE	0.000393903	0.0101407	12.5609	1.8566	NA	NA	NA	NA	NA	NA	NA	NA	NA
MPC	MPC_to_LMP	Calu	FALSE	0.000394925	0.0101434	12.5561	-1.16228	NA	NA	NA	NA	NA	NA	NA	NA	NA
MPC	MPC_to_LMP	Cav2	FALSE	0.000394939	0.0101434	12.556	4.94618	NA	NA	NA	NA	NA	NA	NA	NA	NA
MPC	MPC_to_LMP	Med28	FALSE	0.000401707	0.0103051	12.5242	1.51033	NA	NA	NA	NA	NA	NA	NA	NA	NA
MPC	MPC_to_LMP	Cct2	FALSE	0.000404494	0.0103644	12.5113	1.3082	NA	NA	NA	NA	NA	NA	NA	NA	NA
MPC	MPC_to_LMP	Ube2i	FALSE	0.00041059	0.0105083	12.4834	1.28315	NA	NA	NA	NA	NA	NA	NA	NA	NA
MPC	MPC_to_LMP	Sms	FALSE	0.000411139	0.0105101	12.4809	2.58631	NA	NA	NA	NA	NA	NA	NA	NA	NA
MPC	MPC_to_LMP	Wnk1	FALSE	0.000412064	0.0105214	12.4767	1.99833	NA	NA	NA	NA	NA	NA	NA	NA	NA
MPC	MPC_to_LMP	Kpna4	FALSE	0.000415097	0.0105864	12.463	2.33489	NA	NA	NA	NA	NA	NA	NA	NA	NA
MPC	MPC_to_LMP	Kdelr2	FALSE	0.000416665	0.010614	12.4559	-1.10609	NA	NA	NA	NA	NA	NA	NA	NA	NA
MPC	MPC_to_LMP	Mgst3	FALSE	0.000420696	0.0107042	12.438	-1.62272	NA	NA	NA	NA	NA	NA	NA	NA	NA
MPC	MPC_to_LMP	Pum1	FALSE	0.000423367	0.0107596	12.4261	1.72985	NA	NA	NA	NA	NA	NA	NA	NA	NA
MPC	MPC_to_LMP	Trappc5	FALSE	0.000425171	0.0107929	12.4182	1.9353	NA	NA	NA	NA	NA	NA	NA	NA	NA
MPC	MPC_to_LMP	Psmc5	FALSE	0.000429068	0.0108792	12.4012	1.72352	NA	NA	NA	NA	NA	NA	NA	NA	NA
MPC	MPC_to_LMP	Zc3h14	FALSE	0.000434791	0.0110115	12.3764	2.10417	NA	NA	NA	NA	NA	NA	NA	NA	NA
MPC	MPC_to_LMP	Pmm1	FALSE	0.000436667	0.0110326	12.3684	2.26839	NA	NA	NA	NA	NA	NA	NA	NA	NA
MPC	MPC_to_LMP	Cdc42	FALSE	0.000436965	0.0110326	12.3671	1.10567	NA	NA	NA	NA	NA	NA	NA	NA	NA
MPC	MPC_to_LMP	Sf3b6	FALSE	0.00043714	0.0110326	12.3664	1.37791	NA	NA	NA	NA	NA	NA	NA	NA	NA
MPC	MPC_to_LMP	Col24a1	FALSE	0.00044004	0.011093	12.354	-3.49891	NA	NA	NA	NA	NA	NA	NA	NA	NA
MPC	MPC_to_LMP	Eid2	FALSE	0.000443961	0.0111789	12.3375	2.84648	NA	NA	NA	NA	NA	NA	NA	NA	NA
MPC	MPC_to_LMP	Cebpa	FALSE	0.000452811	0.0113886	12.3006	3.00317	NA	NA	NA	NA	NA	NA	NA	NA	NA
MPC	MPC_to_LMP	Srsf11	FALSE	0.000453728	0.0113986	12.2968	1.43681	NA	NA	NA	NA	NA	NA	NA	NA	NA
MPC	MPC_to_LMP	Elavl1	FALSE	0.000455476	0.0114293	12.2897	1.53928	NA	NA	NA	NA	NA	NA	NA	NA	NA
MPC	MPC_to_LMP	Slu7	FALSE	0.000457096	0.0114568	12.283	2.04902	NA	NA	NA	NA	NA	NA	NA	NA	NA
MPC	MPC_to_LMP	Rpp30	FALSE	0.000462084	0.0115638	12.2628	2.30827	NA	NA	NA	NA	NA	NA	NA	NA	NA
MPC	MPC_to_LMP	Rsf1	FALSE	0.000462426	0.0115638	12.2614	2.07824	NA	NA	NA	NA	NA	NA	NA	NA	NA
MPC	MPC_to_LMP	Tmem263	FALSE	0.000464603	0.011605	12.2526	-1.49702	NA	NA	NA	NA	NA	NA	NA	NA	NA
MPC	MPC_to_LMP	Dbn1	FALSE	0.000467147	0.0116445	12.2424	3.62187	NA	NA	NA	NA	NA	NA	NA	NA	NA
MPC	MPC_to_LMP	Col13a1	FALSE	0.000467253	0.0116445	12.242	-2.63897	NA	NA	NA	NA	NA	NA	NA	NA	NA
MPC	MPC_to_LMP	Trove2	FALSE	0.000472177	0.0117538	12.2225	2.84879	NA	NA	NA	NA	NA	NA	NA	NA	NA
MPC	MPC_to_LMP	Prss23	FALSE	0.000475967	0.0118347	12.2075	3.14335	NA	NA	NA	NA	NA	NA	NA	NA	NA
MPC	MPC_to_LMP	Mrpl47	FALSE	0.0004825	0.0119835	12.1821	3.28439	NA	NA	NA	NA	NA	NA	NA	NA	NA
MPC	MPC_to_LMP	Eif2b1	FALSE	0.00048378	0.0119952	12.1772	2.6791	NA	NA	NA	NA	NA	NA	NA	NA	NA
MPC	MPC_to_LMP	Tsen34	FALSE	0.000484074	0.0119952	12.176	1.60585	NA	NA	NA	NA	NA	NA	NA	NA	NA
MPC	MPC_to_LMP	Bri3bp	FALSE	0.000486603	0.012034	12.1663	2.10961	NA	NA	NA	NA	NA	NA	NA	NA	NA
MPC	MPC_to_LMP	Exosc4	FALSE	0.000487115	0.012034	12.1644	2.01286	NA	NA	NA	NA	NA	NA	NA	NA	NA
MPC	MPC_to_LMP	Tubb5	FALSE	0.000487291	0.012034	12.1637	1.46475	NA	NA	NA	NA	NA	NA	NA	NA	NA
MPC	MPC_to_LMP	Selenbp1	FALSE	0.000491423	0.0121223	12.1479	-2.42	NA	NA	NA	NA	NA	NA	NA	NA	NA
MPC	MPC_to_LMP	Vps26a	FALSE	0.000492063	0.0121244	12.1455	2.68014	NA	NA	NA	NA	NA	NA	NA	NA	NA
MPC	MPC_to_LMP	Ssbp1	FALSE	0.000492729	0.0121271	12.143	1.84189	NA	NA	NA	NA	NA	NA	NA	NA	NA
MPC	MPC_to_LMP	Tjap1	FALSE	0.000494525	0.0121576	12.1362	2.74439	NA	NA	NA	NA	NA	NA	NA	NA	NA
MPC	MPC_to_LMP	Mak16	FALSE	0.000495585	0.01217	12.1322	2.33546	NA	NA	NA	NA	NA	NA	NA	NA	NA
MPC	MPC_to_LMP	Scn1b	FALSE	0.000498381	0.0122249	12.1217	2.63324	NA	NA	NA	NA	NA	NA	NA	NA	NA
MPC	MPC_to_LMP	Noc2l	FALSE	0.000501328	0.0122834	12.1107	2.07388	NA	NA	NA	NA	NA	NA	NA	NA	NA
MPC	MPC_to_LMP	Utp20	FALSE	0.000503491	0.0123225	12.1027	3.51129	NA	NA	NA	NA	NA	NA	NA	NA	NA
MPC	MPC_to_LMP	Ppat	FALSE	0.00050683	0.0123904	12.0904	3.71564	NA	NA	NA	NA	NA	NA	NA	NA	NA
MPC	MPC_to_LMP	1110004F10Rik	FALSE	0.000507719	0.0123982	12.0871	1.35105	NA	NA	NA	NA	NA	NA	NA	NA	NA
MPC	MPC_to_LMP	Tgfb2	FALSE	0.000510162	0.012444	12.0782	3.13969	NA	NA	NA	NA	NA	NA	NA	NA	NA
MPC	MPC_to_LMP	Brd7	FALSE	0.000515097	0.0125503	12.0602	2.24248	NA	NA	NA	NA	NA	NA	NA	NA	NA
MPC	MPC_to_LMP	Hoxc10	FALSE	0.000517878	0.012604	12.0502	2.19726	NA	NA	NA	NA	NA	NA	NA	NA	NA
MPC	MPC_to_LMP	Prrc2c	FALSE	0.000519716	0.0126347	12.0436	1.48295	NA	NA	NA	NA	NA	NA	NA	NA	NA
MPC	MPC_to_LMP	Mdn1	FALSE	0.000521477	0.0126634	12.0373	2.92863	NA	NA	NA	NA	NA	NA	NA	NA	NA
MPC	MPC_to_LMP	Yif1b	FALSE	0.000523811	0.0127051	12.0289	-1.2916	NA	NA	NA	NA	NA	NA	NA	NA	NA
MPC	MPC_to_LMP	Lars2	FALSE	0.00052436	0.0127051	12.027	-1.52373	NA	NA	NA	NA	NA	NA	NA	NA	NA
MPC	MPC_to_LMP	Anxa7	FALSE	0.000527272	0.0127615	12.0167	1.96063	NA	NA	NA	NA	NA	NA	NA	NA	NA
MPC	MPC_to_LMP	Snx6	FALSE	0.000531109	0.0128401	12.0031	1.73253	NA	NA	NA	NA	NA	NA	NA	NA	NA
MPC	MPC_to_LMP	Mrpl11	FALSE	0.000532212	0.0128526	11.9993	1.75304	NA	NA	NA	NA	NA	NA	NA	NA	NA
MPC	MPC_to_LMP	Timm8a1	FALSE	0.0005378	0.0129732	11.9798	2.02585	NA	NA	NA	NA	NA	NA	NA	NA	NA
MPC	MPC_to_LMP	Nfib	FALSE	0.000539632	0.013003	11.9735	1.92504	NA	NA	NA	NA	NA	NA	NA	NA	NA
MPC	MPC_to_LMP	Farsb	FALSE	0.000542263	0.013052	11.9644	2.28324	NA	NA	NA	NA	NA	NA	NA	NA	NA
MPC	MPC_to_LMP	Ncbp1	FALSE	0.000545842	0.0131236	11.9522	2.7789	NA	NA	NA	NA	NA	NA	NA	NA	NA
MPC	MPC_to_LMP	Glce	FALSE	0.000547322	0.0131448	11.9471	3.71451	NA	NA	NA	NA	NA	NA	NA	NA	NA
MPC	MPC_to_LMP	Cox5b	FALSE	0.000548012	0.0131469	11.9448	1.12375	NA	NA	NA	NA	NA	NA	NA	NA	NA
MPC	MPC_to_LMP	Arpc5	FALSE	0.000552252	0.013234	11.9304	1.72349	NA	NA	NA	NA	NA	NA	NA	NA	NA
MPC	MPC_to_LMP	Btg1	FALSE	0.000562918	0.0134748	11.8948	1.52671	NA	NA	NA	NA	NA	NA	NA	NA	NA
MPC	MPC_to_LMP	mt-Nd2	FALSE	0.000564033	0.0134823	11.8911	1.20467	NA	NA	NA	NA	NA	NA	NA	NA	NA
MPC	MPC_to_LMP	Zcchc10	FALSE	0.000564464	0.0134823	11.8897	2.72919	NA	NA	NA	NA	NA	NA	NA	NA	NA
MPC	MPC_to_LMP	Mrc2	FALSE	0.000565601	0.0134947	11.8859	-1.75184	NA	NA	NA	NA	NA	NA	NA	NA	NA
MPC	MPC_to_LMP	Ino80b	FALSE	0.000575285	0.0137107	11.8543	2.66748	NA	NA	NA	NA	NA	NA	NA	NA	NA
MPC	MPC_to_LMP	Lsm5	FALSE	0.00057594	0.0137114	11.8522	1.83828	NA	NA	NA	NA	NA	NA	NA	NA	NA
MPC	MPC_to_LMP	Eda2r	FALSE	0.000578194	0.0137326	11.8449	4.00157	NA	NA	NA	NA	NA	NA	NA	NA	NA
MPC	MPC_to_LMP	Wapl	FALSE	0.000578411	0.0137326	11.8442	1.67911	NA	NA	NA	NA	NA	NA	NA	NA	NA
MPC	MPC_to_LMP	Ddit4l	FALSE	0.00057872	0.0137326	11.8432	3.01911	NA	NA	NA	NA	NA	NA	NA	NA	NA
MPC	MPC_to_LMP	Erg28	FALSE	0.000580215	0.0137532	11.8384	2.17953	NA	NA	NA	NA	NA	NA	NA	NA	NA
MPC	MPC_to_LMP	Ckb	FALSE	0.000581574	0.0137596	11.834	-1.47631	NA	NA	NA	NA	NA	NA	NA	NA	NA
MPC	MPC_to_LMP	Arl2	FALSE	0.000581746	0.0137596	11.8335	1.66419	NA	NA	NA	NA	NA	NA	NA	NA	NA
MPC	MPC_to_LMP	Phf5a	FALSE	0.000584146	0.0137904	11.8258	1.61115	NA	NA	NA	NA	NA	NA	NA	NA	NA
MPC	MPC_to_LMP	Ftsj3	FALSE	0.000584314	0.0137904	11.8253	2.70982	NA	NA	NA	NA	NA	NA	NA	NA	NA
MPC	MPC_to_LMP	Nsmce1	FALSE	0.00058594	0.0138139	11.8201	2.02388	NA	NA	NA	NA	NA	NA	NA	NA	NA
MPC	MPC_to_LMP	Gdf6	FALSE	0.000589583	0.0138848	11.8086	15.6762	NA	NA	NA	NA	NA	NA	NA	NA	NA
MPC	MPC_to_LMP	Socs5	FALSE	0.000601841	0.0141582	11.7703	5.31071	NA	NA	NA	NA	NA	NA	NA	NA	NA
MPC	MPC_to_LMP	Snrnp70	FALSE	0.000606454	0.0142513	11.7561	1.39563	NA	NA	NA	NA	NA	NA	NA	NA	NA
MPC	MPC_to_LMP	Ralbp1	FALSE	0.00060946	0.0142931	11.7469	1.93145	NA	NA	NA	NA	NA	NA	NA	NA	NA
MPC	MPC_to_LMP	Slc9b2	FALSE	0.000609539	0.0142931	11.7466	1.71305	NA	NA	NA	NA	NA	NA	NA	NA	NA
MPC	MPC_to_LMP	Pdcl3	FALSE	0.000610677	0.0143044	11.7431	1.73374	NA	NA	NA	NA	NA	NA	NA	NA	NA
MPC	MPC_to_LMP	Ngdn	FALSE	0.000617521	0.0144492	11.7224	2.0773	NA	NA	NA	NA	NA	NA	NA	NA	NA
MPC	MPC_to_LMP	Ethe1	FALSE	0.000618378	0.0144538	11.7198	2.59617	NA	NA	NA	NA	NA	NA	NA	NA	NA
MPC	MPC_to_LMP	Capza1	FALSE	0.000619771	0.0144708	11.7156	1.71737	NA	NA	NA	NA	NA	NA	NA	NA	NA
MPC	MPC_to_LMP	Pebp1	FALSE	0.000631241	0.0147229	11.6815	1.06342	NA	NA	NA	NA	NA	NA	NA	NA	NA
MPC	MPC_to_LMP	Eif1a	FALSE	0.000633831	0.0147675	11.6739	1.50141	NA	NA	NA	NA	NA	NA	NA	NA	NA
MPC	MPC_to_LMP	Mrpl49	FALSE	0.000637427	0.0148355	11.6634	2.31151	NA	NA	NA	NA	NA	NA	NA	NA	NA
MPC	MPC_to_LMP	Luc7l3	FALSE	0.00064257	0.0149234	11.6484	1.99938	NA	NA	NA	NA	NA	NA	NA	NA	NA
MPC	MPC_to_LMP	Rpl10a	FALSE	0.000642574	0.0149234	11.6484	0.995025	NA	NA	NA	NA	NA	NA	NA	NA	NA
MPC	MPC_to_LMP	Ptcd2	FALSE	0.000647202	0.0150149	11.6351	3.10638	NA	NA	NA	NA	NA	NA	NA	NA	NA
MPC	MPC_to_LMP	Ezr	FALSE	0.000651563	0.0151001	11.6226	3.22754	NA	NA	NA	NA	NA	NA	NA	NA	NA
MPC	MPC_to_LMP	Hnrnpa3	FALSE	0.000658194	0.0152376	11.6037	1.41824	NA	NA	NA	NA	NA	NA	NA	NA	NA
MPC	MPC_to_LMP	Capza2	FALSE	0.000659791	0.0152584	11.5992	1.29815	NA	NA	NA	NA	NA	NA	NA	NA	NA
MPC	MPC_to_LMP	Tpt1	FALSE	0.00066519	0.0153669	11.5841	0.938081	NA	NA	NA	NA	NA	NA	NA	NA	NA
MPC	MPC_to_LMP	H19	FALSE	0.000667831	0.0153717	11.5767	5.1766	NA	NA	NA	NA	NA	NA	NA	NA	NA
MPC	MPC_to_LMP	Nmt1	FALSE	0.000668071	0.0153717	11.576	1.77244	NA	NA	NA	NA	NA	NA	NA	NA	NA
MPC	MPC_to_LMP	Wasf2	FALSE	0.000668516	0.0153717	11.5748	1.76965	NA	NA	NA	NA	NA	NA	NA	NA	NA
MPC	MPC_to_LMP	Gnai3	FALSE	0.000668637	0.0153717	11.5745	1.79896	NA	NA	NA	NA	NA	NA	NA	NA	NA
MPC	MPC_to_LMP	Tmem209	FALSE	0.000668916	0.0153717	11.5737	3.72037	NA	NA	NA	NA	NA	NA	NA	NA	NA
MPC	MPC_to_LMP	Vdac1	FALSE	0.000673206	0.015454	11.5618	1.50637	NA	NA	NA	NA	NA	NA	NA	NA	NA
MPC	MPC_to_LMP	Psmd14	FALSE	0.000675129	0.0154819	11.5565	1.90728	NA	NA	NA	NA	NA	NA	NA	NA	NA
MPC	MPC_to_LMP	Sod2	FALSE	0.000677743	0.0155255	11.5493	1.53035	NA	NA	NA	NA	NA	NA	NA	NA	NA
MPC	MPC_to_LMP	Plod2	FALSE	0.000684422	0.0156621	11.5311	-1.27361	NA	NA	NA	NA	NA	NA	NA	NA	NA
MPC	MPC_to_LMP	Babam1	FALSE	0.000685613	0.0156729	11.5278	1.98779	NA	NA	NA	NA	NA	NA	NA	NA	NA
MPC	MPC_to_LMP	Aox4	FALSE	0.000690381	0.0157654	11.515	4.27047	NA	NA	NA	NA	NA	NA	NA	NA	NA
MPC	MPC_to_LMP	Wipf1	FALSE	0.000695666	0.0158695	11.5008	3.84942	NA	NA	NA	NA	NA	NA	NA	NA	NA
MPC	MPC_to_LMP	Map4	FALSE	0.000696509	0.0158721	11.4985	1.92276	NA	NA	NA	NA	NA	NA	NA	NA	NA
MPC	MPC_to_LMP	Exoc3	FALSE	0.000697707	0.0158727	11.4953	2.46661	NA	NA	NA	NA	NA	NA	NA	NA	NA
MPC	MPC_to_LMP	Nid2	FALSE	0.000698645	0.0158727	11.4928	-3.06376	NA	NA	NA	NA	NA	NA	NA	NA	NA
MPC	MPC_to_LMP	Chmp3	FALSE	0.000698714	0.0158727	11.4927	1.48956	NA	NA	NA	NA	NA	NA	NA	NA	NA
MPC	MPC_to_LMP	Enpp2	FALSE	0.000711057	0.0161363	11.4601	6.12094	NA	NA	NA	NA	NA	NA	NA	NA	NA
MPC	MPC_to_LMP	Tmpo	FALSE	0.000713537	0.0161757	11.4536	3.48018	NA	NA	NA	NA	NA	NA	NA	NA	NA
MPC	MPC_to_LMP	Rragc	FALSE	0.00071532	0.0161993	11.449	1.96418	NA	NA	NA	NA	NA	NA	NA	NA	NA
MPC	MPC_to_LMP	Nfatc4	FALSE	0.000719905	0.0162863	11.4371	4.52834	NA	NA	NA	NA	NA	NA	NA	NA	NA
MPC	MPC_to_LMP	Col22a1	FALSE	0.000722333	0.0163243	11.4309	-2.29182	NA	NA	NA	NA	NA	NA	NA	NA	NA
MPC	MPC_to_LMP	Lima1	FALSE	0.000725786	0.0163707	11.422	2.37204	NA	NA	NA	NA	NA	NA	NA	NA	NA
MPC	MPC_to_LMP	mt-Cytb	FALSE	0.000725886	0.0163707	11.4218	0.972809	NA	NA	NA	NA	NA	NA	NA	NA	NA
MPC	MPC_to_LMP	Nubp1	FALSE	0.000731415	0.0164783	11.4077	2.2118	NA	NA	NA	NA	NA	NA	NA	NA	NA
MPC	MPC_to_LMP	Sgpl1	FALSE	0.000734069	0.0165211	11.4009	2.82093	NA	NA	NA	NA	NA	NA	NA	NA	NA
MPC	MPC_to_LMP	Fhl2	FALSE	0.000738902	0.0166127	11.3888	2.35051	NA	NA	NA	NA	NA	NA	NA	NA	NA
MPC	MPC_to_LMP	Tomm40	FALSE	0.00074014	0.0166234	11.3856	1.84344	NA	NA	NA	NA	NA	NA	NA	NA	NA
MPC	MPC_to_LMP	9130401M01Rik	FALSE	0.000741083	0.0166275	11.3833	2.39043	NA	NA	NA	NA	NA	NA	NA	NA	NA
MPC	MPC_to_LMP	Lrrc17	FALSE	0.000743842	0.0166723	11.3764	-3.71954	NA	NA	NA	NA	NA	NA	NA	NA	NA
MPC	MPC_to_LMP	Tmed5	FALSE	0.000745534	0.0166822	11.3722	1.7194	NA	NA	NA	NA	NA	NA	NA	NA	NA
MPC	MPC_to_LMP	Smim8	FALSE	0.000746563	0.0166822	11.3696	3.12318	NA	NA	NA	NA	NA	NA	NA	NA	NA
MPC	MPC_to_LMP	Cplx3	FALSE	0.000746576	0.0166822	11.3696	1.33234	NA	NA	NA	NA	NA	NA	NA	NA	NA
MPC	MPC_to_LMP	Dhx36	FALSE	0.000748556	0.0167093	11.3646	1.65819	NA	NA	NA	NA	NA	NA	NA	NA	NA
MPC	MPC_to_LMP	Acads	FALSE	0.000751845	0.0167656	11.3565	2.16069	NA	NA	NA	NA	NA	NA	NA	NA	NA
MPC	MPC_to_LMP	Sppl3	FALSE	0.000761611	0.016966	11.3325	2.13201	NA	NA	NA	NA	NA	NA	NA	NA	NA
MPC	MPC_to_LMP	Prss35	FALSE	0.00076249	0.0169683	11.3304	-2.09517	NA	NA	NA	NA	NA	NA	NA	NA	NA
MPC	MPC_to_LMP	Pdcd6	FALSE	0.000766226	0.0170341	11.3213	1.34083	NA	NA	NA	NA	NA	NA	NA	NA	NA
MPC	MPC_to_LMP	Tnfrsf10b	FALSE	0.000768077	0.0170579	11.3168	3.9543	NA	NA	NA	NA	NA	NA	NA	NA	NA
MPC	MPC_to_LMP	Capzb	FALSE	0.000770148	0.0170865	11.3118	1.19793	NA	NA	NA	NA	NA	NA	NA	NA	NA
MPC	MPC_to_LMP	Rps20	FALSE	0.000774128	0.0171574	11.3023	0.982117	NA	NA	NA	NA	NA	NA	NA	NA	NA
MPC	MPC_to_LMP	Bahcc1	FALSE	0.000775215	0.017164	11.2997	4.492	NA	NA	NA	NA	NA	NA	NA	NA	NA
MPC	MPC_to_LMP	Bsg	FALSE	0.00078599	0.017385	11.274	-1.10604	NA	NA	NA	NA	NA	NA	NA	NA	NA
MPC	MPC_to_LMP	Mgmt	FALSE	0.000787792	0.0174072	11.2698	2.11648	NA	NA	NA	NA	NA	NA	NA	NA	NA
MPC	MPC_to_LMP	Fnta	FALSE	0.000795964	0.01757	11.2506	1.7254	NA	NA	NA	NA	NA	NA	NA	NA	NA
MPC	MPC_to_LMP	Sbds	FALSE	0.000798637	0.0176111	11.2444	1.8992	NA	NA	NA	NA	NA	NA	NA	NA	NA
MPC	MPC_to_LMP	Ubtf	FALSE	0.000802873	0.0176867	11.2346	1.82284	NA	NA	NA	NA	NA	NA	NA	NA	NA
MPC	MPC_to_LMP	Hnrnpc	FALSE	0.000804547	0.0177008	11.2307	1.3183	NA	NA	NA	NA	NA	NA	NA	NA	NA
MPC	MPC_to_LMP	Gas8	FALSE	0.000805133	0.0177008	11.2294	3.19502	NA	NA	NA	NA	NA	NA	NA	NA	NA
MPC	MPC_to_LMP	mt-Nd1	FALSE	0.000806969	0.0177233	11.2251	1.11997	NA	NA	NA	NA	NA	NA	NA	NA	NA
MPC	MPC_to_LMP	Irgm1	FALSE	0.000811617	0.0178074	11.2145	5.08412	NA	NA	NA	NA	NA	NA	NA	NA	NA
MPC	MPC_to_LMP	Commd1	FALSE	0.000815597	0.0178768	11.2054	1.51351	NA	NA	NA	NA	NA	NA	NA	NA	NA
MPC	MPC_to_LMP	Gpm6b	FALSE	0.000824213	0.0180475	11.1859	4.12982	NA	NA	NA	NA	NA	NA	NA	NA	NA
MPC	MPC_to_LMP	Kmt5a	FALSE	0.000828071	0.0181139	11.1772	1.9642	NA	NA	NA	NA	NA	NA	NA	NA	NA
MPC	MPC_to_LMP	Tfap4	FALSE	0.000830387	0.0181463	11.1721	5.03377	NA	NA	NA	NA	NA	NA	NA	NA	NA
MPC	MPC_to_LMP	Ywhag	FALSE	0.000843049	0.0184046	11.144	1.63597	NA	NA	NA	NA	NA	NA	NA	NA	NA
MPC	MPC_to_LMP	Atp5d	FALSE	0.000848604	0.0185074	11.1318	0.961807	NA	NA	NA	NA	NA	NA	NA	NA	NA
MPC	MPC_to_LMP	Igfbp5	FALSE	0.000851227	0.0185291	11.1261	4.78311	NA	NA	NA	NA	NA	NA	NA	NA	NA
MPC	MPC_to_LMP	Brd4	FALSE	0.000851297	0.0185291	11.1259	1.78078	NA	NA	NA	NA	NA	NA	NA	NA	NA
MPC	MPC_to_LMP	Usp10	FALSE	0.000855188	0.0185952	11.1175	3.50164	NA	NA	NA	NA	NA	NA	NA	NA	NA
MPC	MPC_to_LMP	Exoc4	FALSE	0.000858106	0.0186401	11.1111	2.30294	NA	NA	NA	NA	NA	NA	NA	NA	NA
MPC	MPC_to_LMP	Rtcb	FALSE	0.000860072	0.0186642	11.1069	1.76682	NA	NA	NA	NA	NA	NA	NA	NA	NA
MPC	MPC_to_LMP	Larp4b	FALSE	0.000863537	0.0187208	11.0994	1.70714	NA	NA	NA	NA	NA	NA	NA	NA	NA
MPC	MPC_to_LMP	Uba3	FALSE	0.000873021	0.0189077	11.0792	1.84244	NA	NA	NA	NA	NA	NA	NA	NA	NA
MPC	MPC_to_LMP	Nit2	FALSE	0.000883588	0.0191176	11.0569	2.73113	NA	NA	NA	NA	NA	NA	NA	NA	NA
MPC	MPC_to_LMP	Tmem45a	FALSE	0.000886285	0.0191569	11.0512	-1.66526	NA	NA	NA	NA	NA	NA	NA	NA	NA
MPC	MPC_to_LMP	Hapln3	FALSE	0.000892695	0.0192764	11.0379	-3.33184	NA	NA	NA	NA	NA	NA	NA	NA	NA
MPC	MPC_to_LMP	Rnf169	FALSE	0.000894691	0.0193004	11.0337	3.45553	NA	NA	NA	NA	NA	NA	NA	NA	NA
MPC	MPC_to_LMP	Pqlc3	FALSE	0.000899902	0.0193936	11.023	3.42607	NA	NA	NA	NA	NA	NA	NA	NA	NA
MPC	MPC_to_LMP	Tbcb	FALSE	0.000902116	0.0194222	11.0184	1.63287	NA	NA	NA	NA	NA	NA	NA	NA	NA
MPC	MPC_to_LMP	Parvb	FALSE	0.000915854	0.0196985	10.9904	5.36882	NA	NA	NA	NA	NA	NA	NA	NA	NA
MPC	MPC_to_LMP	Asna1	FALSE	0.000918602	0.0197382	10.9848	2.03348	NA	NA	NA	NA	NA	NA	NA	NA	NA
MPC	MPC_to_LMP	B4galt1	FALSE	0.000932617	0.0200196	10.9568	1.95328	NA	NA	NA	NA	NA	NA	NA	NA	NA
MPC	MPC_to_LMP	Blcap	FALSE	0.00093429	0.0200358	10.9535	2.90563	NA	NA	NA	NA	NA	NA	NA	NA	NA
MPC	MPC_to_LMP	Spryd4	FALSE	0.000948852	0.0203281	10.9248	3.87181	NA	NA	NA	NA	NA	NA	NA	NA	NA
MPC	MPC_to_LMP	Rbm39	FALSE	0.000953364	0.0204048	10.916	1.0067	NA	NA	NA	NA	NA	NA	NA	NA	NA
MPC	MPC_to_LMP	Mrps16	FALSE	0.00095822	0.020471	10.9066	1.34632	NA	NA	NA	NA	NA	NA	NA	NA	NA
MPC	MPC_to_LMP	Nob1	FALSE	0.000958333	0.020471	10.9064	2.16304	NA	NA	NA	NA	NA	NA	NA	NA	NA
MPC	MPC_to_LMP	Itpa	FALSE	0.00096287	0.0205478	10.8976	2.20773	NA	NA	NA	NA	NA	NA	NA	NA	NA
MPC	MPC_to_LMP	Polr1a	FALSE	0.000970064	0.0206811	10.8838	2.56224	NA	NA	NA	NA	NA	NA	NA	NA	NA
MPC	MPC_to_LMP	Kars	FALSE	0.000974669	0.020759	10.8751	1.74593	NA	NA	NA	NA	NA	NA	NA	NA	NA
MPC	MPC_to_LMP	Utp11	FALSE	0.00097569	0.0207605	10.8731	1.72038	NA	NA	NA	NA	NA	NA	NA	NA	NA
MPC	MPC_to_LMP	Map4k4	FALSE	0.000977548	0.0207798	10.8696	1.47922	NA	NA	NA	NA	NA	NA	NA	NA	NA
MPC	MPC_to_LMP	Rrp7a	FALSE	0.000981565	0.0208422	10.862	2.16184	NA	NA	NA	NA	NA	NA	NA	NA	NA
MPC	MPC_to_LMP	Fam129b	FALSE	0.000982395	0.0208422	10.8605	2.26393	NA	NA	NA	NA	NA	NA	NA	NA	NA
MPC	MPC_to_LMP	Polr2h	FALSE	0.000983983	0.0208557	10.8575	2.02276	NA	NA	NA	NA	NA	NA	NA	NA	NA
MPC	MPC_to_LMP	Uhrf2	FALSE	0.000986965	0.0208986	10.8519	2.21702	NA	NA	NA	NA	NA	NA	NA	NA	NA
MPC	MPC_to_LMP	S100a8	FALSE	0.000994557	0.0210389	10.8377	-3.35777	NA	NA	NA	NA	NA	NA	NA	NA	NA
MPC	MPC_to_LMP	Mrps6	FALSE	0.000998965	0.0211117	10.8295	2.23866	NA	NA	NA	NA	NA	NA	NA	NA	NA
MPC	MPC_to_LMP	Rpl18a	FALSE	0.00100428	0.0212036	10.8197	0.883717	NA	NA	NA	NA	NA	NA	NA	NA	NA
MPC	MPC_to_LMP	Cmss1	FALSE	0.00100786	0.0212444	10.8131	2.71465	NA	NA	NA	NA	NA	NA	NA	NA	NA
MPC	MPC_to_LMP	Rpl23	FALSE	0.00100816	0.0212444	10.8125	0.891524	NA	NA	NA	NA	NA	NA	NA	NA	NA
MPC	MPC_to_LMP	Psmd6	FALSE	0.00101552	0.0213789	10.799	1.45575	NA	NA	NA	NA	NA	NA	NA	NA	NA
MPC	MPC_to_LMP	Usp34	FALSE	0.00101889	0.021429	10.7929	1.50947	NA	NA	NA	NA	NA	NA	NA	NA	NA
MPC	MPC_to_LMP	Wnt7b	FALSE	0.00102171	0.0214678	10.7878	17.3425	NA	NA	NA	NA	NA	NA	NA	NA	NA
MPC	MPC_to_LMP	Commd2	FALSE	0.00102324	0.0214792	10.785	2.02932	NA	NA	NA	NA	NA	NA	NA	NA	NA
MPC	MPC_to_LMP	Degs1	FALSE	0.00103219	0.0216376	10.7689	1.69526	NA	NA	NA	NA	NA	NA	NA	NA	NA
MPC	MPC_to_LMP	Inhbb	FALSE	0.00103348	0.0216376	10.7666	5.90892	NA	NA	NA	NA	NA	NA	NA	NA	NA
MPC	MPC_to_LMP	Polr1c	FALSE	0.00103376	0.0216376	10.7661	2.05573	NA	NA	NA	NA	NA	NA	NA	NA	NA
MPC	MPC_to_LMP	Kcnh2	FALSE	0.0010413	0.0217745	10.7527	-3.89816	NA	NA	NA	NA	NA	NA	NA	NA	NA
MPC	MPC_to_LMP	Actn4	FALSE	0.0010427	0.021783	10.7502	1.54057	NA	NA	NA	NA	NA	NA	NA	NA	NA
MPC	MPC_to_LMP	Pmp22	FALSE	0.00105345	0.0219865	10.7312	-1.89242	NA	NA	NA	NA	NA	NA	NA	NA	NA
MPC	MPC_to_LMP	Supt16	FALSE	0.0010581	0.0220624	10.723	2.05849	NA	NA	NA	NA	NA	NA	NA	NA	NA
MPC	MPC_to_LMP	Atg3	FALSE	0.00106166	0.022101	10.7168	1.69744	NA	NA	NA	NA	NA	NA	NA	NA	NA
MPC	MPC_to_LMP	Mrps5	FALSE	0.00106293	0.022101	10.7146	1.95391	NA	NA	NA	NA	NA	NA	NA	NA	NA
MPC	MPC_to_LMP	Ppa2	FALSE	0.00106382	0.022101	10.7131	2.20307	NA	NA	NA	NA	NA	NA	NA	NA	NA
MPC	MPC_to_LMP	Mrpl24	FALSE	0.001064	0.022101	10.7127	1.45209	NA	NA	NA	NA	NA	NA	NA	NA	NA
MPC	MPC_to_LMP	Idh3b	FALSE	0.00106776	0.0221581	10.7062	1.84782	NA	NA	NA	NA	NA	NA	NA	NA	NA
MPC	MPC_to_LMP	Pnn	FALSE	0.00109053	0.0226091	10.6672	2.15193	NA	NA	NA	NA	NA	NA	NA	NA	NA
MPC	MPC_to_LMP	Las1l	FALSE	0.00109227	0.0226237	10.6642	2.25338	NA	NA	NA	NA	NA	NA	NA	NA	NA
MPC	MPC_to_LMP	Mxra7	FALSE	0.00109355	0.0226287	10.6621	2.52707	NA	NA	NA	NA	NA	NA	NA	NA	NA
MPC	MPC_to_LMP	Psmd1	FALSE	0.00110211	0.0227792	10.6476	1.8615	NA	NA	NA	NA	NA	NA	NA	NA	NA
MPC	MPC_to_LMP	Lamtor5	FALSE	0.00110358	0.0227792	10.6452	1.53507	NA	NA	NA	NA	NA	NA	NA	NA	NA
MPC	MPC_to_LMP	Trp53inp1	FALSE	0.00110395	0.0227792	10.6446	2.60221	NA	NA	NA	NA	NA	NA	NA	NA	NA
MPC	MPC_to_LMP	Cd44	FALSE	0.00110593	0.0227874	10.6412	2.1935	NA	NA	NA	NA	NA	NA	NA	NA	NA
MPC	MPC_to_LMP	Cfl1	FALSE	0.00110644	0.0227874	10.6404	1.06194	NA	NA	NA	NA	NA	NA	NA	NA	NA
MPC	MPC_to_LMP	Lias	FALSE	0.00111546	0.0229515	10.6254	2.02788	NA	NA	NA	NA	NA	NA	NA	NA	NA
MPC	MPC_to_LMP	Psmc1	FALSE	0.0011205	0.0230143	10.617	1.63235	NA	NA	NA	NA	NA	NA	NA	NA	NA
MPC	MPC_to_LMP	Cyth3	FALSE	0.00112061	0.0230143	10.6169	3.69805	NA	NA	NA	NA	NA	NA	NA	NA	NA
MPC	MPC_to_LMP	Sdc1	FALSE	0.00113602	0.0233087	10.5916	2.45394	NA	NA	NA	NA	NA	NA	NA	NA	NA
MPC	MPC_to_LMP	Eif3h	FALSE	0.00114034	0.0233753	10.5846	1.0896	NA	NA	NA	NA	NA	NA	NA	NA	NA
MPC	MPC_to_LMP	Pdgfrb	FALSE	0.00114937	0.0235383	10.57	2.34484	NA	NA	NA	NA	NA	NA	NA	NA	NA
MPC	MPC_to_LMP	Sars	FALSE	0.00115364	0.0236036	10.5632	1.35453	NA	NA	NA	NA	NA	NA	NA	NA	NA
MPC	MPC_to_LMP	AU020206	FALSE	0.00117401	0.0239979	10.5308	5.68774	NA	NA	NA	NA	NA	NA	NA	NA	NA
MPC	MPC_to_LMP	Pak1	FALSE	0.00117663	0.024029	10.5267	2.27981	NA	NA	NA	NA	NA	NA	NA	NA	NA
MPC	MPC_to_LMP	Efna5	FALSE	0.00117779	0.0240302	10.5249	4.89037	NA	NA	NA	NA	NA	NA	NA	NA	NA
MPC	MPC_to_LMP	Prdx6	FALSE	0.00118662	0.0241806	10.5111	1.42835	NA	NA	NA	NA	NA	NA	NA	NA	NA
MPC	MPC_to_LMP	mt-Atp6	FALSE	0.00118738	0.0241806	10.5099	0.912867	NA	NA	NA	NA	NA	NA	NA	NA	NA
MPC	MPC_to_LMP	Anxa8	FALSE	0.00119159	0.0242439	10.5033	7.23451	NA	NA	NA	NA	NA	NA	NA	NA	NA
MPC	MPC_to_LMP	Tpm2	FALSE	0.00119482	0.0242868	10.4983	1.75654	NA	NA	NA	NA	NA	NA	NA	NA	NA
MPC	MPC_to_LMP	Otud6b	FALSE	0.00119824	0.0243263	10.4931	2.5042	NA	NA	NA	NA	NA	NA	NA	NA	NA
MPC	MPC_to_LMP	AW011738	FALSE	0.00119899	0.0243263	10.4919	0.634878	NA	NA	NA	NA	NA	NA	NA	NA	NA
MPC	MPC_to_LMP	Tsnax	FALSE	0.00122651	0.0248615	10.45	2.21676	NA	NA	NA	NA	NA	NA	NA	NA	NA
MPC	MPC_to_LMP	Robo2	FALSE	0.0012413	0.025138	10.4278	-3.20899	NA	NA	NA	NA	NA	NA	NA	NA	NA
MPC	MPC_to_LMP	Smg7	FALSE	0.0012428	0.0251422	10.4256	2.26497	NA	NA	NA	NA	NA	NA	NA	NA	NA
MPC	MPC_to_LMP	Dctn2	FALSE	0.00124471	0.0251422	10.4228	1.43304	NA	NA	NA	NA	NA	NA	NA	NA	NA
MPC	MPC_to_LMP	Rheb	FALSE	0.00124496	0.0251422	10.4224	1.22374	NA	NA	NA	NA	NA	NA	NA	NA	NA
MPC	MPC_to_LMP	1110004E09Rik	FALSE	0.00125571	0.0253358	10.4065	2.51633	NA	NA	NA	NA	NA	NA	NA	NA	NA
MPC	MPC_to_LMP	Gm16894	FALSE	0.00126148	0.0254288	10.3981	1.61006	NA	NA	NA	NA	NA	NA	NA	NA	NA
MPC	MPC_to_LMP	Gpr68	FALSE	0.00127178	0.0256128	10.383	1.27798	NA	NA	NA	NA	NA	NA	NA	NA	NA
MPC	MPC_to_LMP	Map1b	FALSE	0.00127581	0.0256702	10.3772	3.00061	NA	NA	NA	NA	NA	NA	NA	NA	NA
MPC	MPC_to_LMP	Cpne8	FALSE	0.00127834	0.0256974	10.3735	3.55808	NA	NA	NA	NA	NA	NA	NA	NA	NA
MPC	MPC_to_LMP	Ltbp1	FALSE	0.00128161	0.0257336	10.3688	1.64111	NA	NA	NA	NA	NA	NA	NA	NA	NA
MPC	MPC_to_LMP	Sdc2	FALSE	0.00128272	0.0257336	10.3672	1.43893	NA	NA	NA	NA	NA	NA	NA	NA	NA
MPC	MPC_to_LMP	Tmem100	FALSE	0.00128368	0.0257336	10.3659	5.84129	NA	NA	NA	NA	NA	NA	NA	NA	NA
MPC	MPC_to_LMP	Meis2	FALSE	0.00128842	0.025805	10.359	2.89216	NA	NA	NA	NA	NA	NA	NA	NA	NA
MPC	MPC_to_LMP	Scx	FALSE	0.00130179	0.0260489	10.34	-2.26849	NA	NA	NA	NA	NA	NA	NA	NA	NA
MPC	MPC_to_LMP	Rps12	FALSE	0.00130356	0.0260605	10.3375	0.914935	NA	NA	NA	NA	NA	NA	NA	NA	NA
MPC	MPC_to_LMP	Skiv2l2	FALSE	0.00130484	0.0260622	10.3357	2.32831	NA	NA	NA	NA	NA	NA	NA	NA	NA
MPC	MPC_to_LMP	Flvcr2	FALSE	0.00131228	0.0261869	10.3252	-3.63407	NA	NA	NA	NA	NA	NA	NA	NA	NA
MPC	MPC_to_LMP	Trip10	FALSE	0.00131655	0.0262055	10.3192	3.49617	NA	NA	NA	NA	NA	NA	NA	NA	NA
MPC	MPC_to_LMP	Zfp706	FALSE	0.00131664	0.0262055	10.319	1.27328	NA	NA	NA	NA	NA	NA	NA	NA	NA
MPC	MPC_to_LMP	Nuak1	FALSE	0.00131682	0.0262055	10.3188	-1.63952	NA	NA	NA	NA	NA	NA	NA	NA	NA
MPC	MPC_to_LMP	Wdr77	FALSE	0.00132185	0.0262818	10.3118	2.3281	NA	NA	NA	NA	NA	NA	NA	NA	NA
MPC	MPC_to_LMP	Ube2d3	FALSE	0.00132613	0.0263428	10.3058	1.08366	NA	NA	NA	NA	NA	NA	NA	NA	NA
MPC	MPC_to_LMP	Tspan5	FALSE	0.00132753	0.0263466	10.3039	4.57647	NA	NA	NA	NA	NA	NA	NA	NA	NA
MPC	MPC_to_LMP	Nol8	FALSE	0.00132949	0.0263615	10.3011	2.4484	NA	NA	NA	NA	NA	NA	NA	NA	NA
MPC	MPC_to_LMP	Mrps36	FALSE	0.0013383	0.0265122	10.2889	1.34796	NA	NA	NA	NA	NA	NA	NA	NA	NA
MPC	MPC_to_LMP	B4galnt1	FALSE	0.00134175	0.0265565	10.2842	3.3346	NA	NA	NA	NA	NA	NA	NA	NA	NA
MPC	MPC_to_LMP	Ncln	FALSE	0.00134841	0.026664	10.2751	1.96311	NA	NA	NA	NA	NA	NA	NA	NA	NA
MPC	MPC_to_LMP	Ndufb4	FALSE	0.00135678	0.0267628	10.2636	1.23271	NA	NA	NA	NA	NA	NA	NA	NA	NA
MPC	MPC_to_LMP	Trim35	FALSE	0.00135703	0.0267628	10.2633	1.55356	NA	NA	NA	NA	NA	NA	NA	NA	NA
MPC	MPC_to_LMP	Asap1	FALSE	0.00135708	0.0267628	10.2632	1.82682	NA	NA	NA	NA	NA	NA	NA	NA	NA
MPC	MPC_to_LMP	Drg2	FALSE	0.00135912	0.0267789	10.2605	2.10578	NA	NA	NA	NA	NA	NA	NA	NA	NA
MPC	MPC_to_LMP	Tfdp1	FALSE	0.00136663	0.0269025	10.2503	2.21033	NA	NA	NA	NA	NA	NA	NA	NA	NA
MPC	MPC_to_LMP	Renbp	FALSE	0.00138146	0.02717	10.2304	2.43741	NA	NA	NA	NA	NA	NA	NA	NA	NA
MPC	MPC_to_LMP	Parp3	FALSE	0.00138538	0.0272225	10.2252	2.68412	NA	NA	NA	NA	NA	NA	NA	NA	NA
MPC	MPC_to_LMP	Cpz	FALSE	0.00138801	0.0272497	10.2217	-4.00183	NA	NA	NA	NA	NA	NA	NA	NA	NA
MPC	MPC_to_LMP	Elovl1	FALSE	0.00139567	0.0273747	10.2115	1.57497	NA	NA	NA	NA	NA	NA	NA	NA	NA
MPC	MPC_to_LMP	Rgs6	FALSE	0.00139688	0.0273747	10.2099	2.99706	NA	NA	NA	NA	NA	NA	NA	NA	NA
MPC	MPC_to_LMP	Ubqln4	FALSE	0.00141499	0.0276934	10.1862	2.52646	NA	NA	NA	NA	NA	NA	NA	NA	NA
MPC	MPC_to_LMP	Spg21	FALSE	0.00141569	0.0276934	10.1853	2.02623	NA	NA	NA	NA	NA	NA	NA	NA	NA
MPC	MPC_to_LMP	Rbm17	FALSE	0.00141774	0.0277088	10.1826	1.71897	NA	NA	NA	NA	NA	NA	NA	NA	NA
MPC	MPC_to_LMP	Syn3	FALSE	0.00143254	0.0279111	10.1634	5.43497	NA	NA	NA	NA	NA	NA	NA	NA	NA
MPC	MPC_to_LMP	Pex19	FALSE	0.00143261	0.0279111	10.1633	1.94712	NA	NA	NA	NA	NA	NA	NA	NA	NA
MPC	MPC_to_LMP	Prpf31	FALSE	0.00143386	0.0279111	10.1617	2.17691	NA	NA	NA	NA	NA	NA	NA	NA	NA
MPC	MPC_to_LMP	Rbmxl1	FALSE	0.00143398	0.0279111	10.1616	2.48177	NA	NA	NA	NA	NA	NA	NA	NA	NA
MPC	MPC_to_LMP	Thop1	FALSE	0.00143469	0.0279111	10.1607	2.24355	NA	NA	NA	NA	NA	NA	NA	NA	NA
MPC	MPC_to_LMP	Dhx15	FALSE	0.00143576	0.0279111	10.1593	1.63131	NA	NA	NA	NA	NA	NA	NA	NA	NA
MPC	MPC_to_LMP	Brk1	FALSE	0.00143956	0.0279599	10.1544	1.07106	NA	NA	NA	NA	NA	NA	NA	NA	NA
MPC	MPC_to_LMP	Prrx1	FALSE	0.00144585	0.0280375	10.1464	1.53334	NA	NA	NA	NA	NA	NA	NA	NA	NA
MPC	MPC_to_LMP	Rftn1	FALSE	0.00144612	0.0280375	10.146	3.47221	NA	NA	NA	NA	NA	NA	NA	NA	NA
MPC	MPC_to_LMP	Uck2	FALSE	0.00145172	0.0281212	10.1389	2.38265	NA	NA	NA	NA	NA	NA	NA	NA	NA
MPC	MPC_to_LMP	2310011J03Rik	FALSE	0.00145408	0.0281292	10.1359	2.36209	NA	NA	NA	NA	NA	NA	NA	NA	NA
MPC	MPC_to_LMP	Tpp1	FALSE	0.00145471	0.0281292	10.1351	1.68269	NA	NA	NA	NA	NA	NA	NA	NA	NA
MPC	MPC_to_LMP	Gm16286	FALSE	0.0014566	0.0281407	10.1327	1.44638	NA	NA	NA	NA	NA	NA	NA	NA	NA
MPC	MPC_to_LMP	Akt1s1	FALSE	0.0014617	0.0282144	10.1263	1.56245	NA	NA	NA	NA	NA	NA	NA	NA	NA
MPC	MPC_to_LMP	Smarca5	FALSE	0.00147034	0.028356	10.1154	1.42267	NA	NA	NA	NA	NA	NA	NA	NA	NA
MPC	MPC_to_LMP	Sptlc2	FALSE	0.00147548	0.0284058	10.109	2.27686	NA	NA	NA	NA	NA	NA	NA	NA	NA
MPC	MPC_to_LMP	Champ1	FALSE	0.00147617	0.0284058	10.1081	3.11963	NA	NA	NA	NA	NA	NA	NA	NA	NA
MPC	MPC_to_LMP	Mrpl2	FALSE	0.00147682	0.0284058	10.1073	1.78003	NA	NA	NA	NA	NA	NA	NA	NA	NA
MPC	MPC_to_LMP	Ube3a	FALSE	0.00147908	0.0284242	10.1045	1.44512	NA	NA	NA	NA	NA	NA	NA	NA	NA
MPC	MPC_to_LMP	Apbb2	FALSE	0.00148059	0.0284282	10.1026	1.9202	NA	NA	NA	NA	NA	NA	NA	NA	NA
MPC	MPC_to_LMP	1810022K09Rik	FALSE	0.00148258	0.0284412	10.1001	1.60782	NA	NA	NA	NA	NA	NA	NA	NA	NA
MPC	MPC_to_LMP	Prr13	FALSE	0.00149129	0.0285833	10.0893	2.00958	NA	NA	NA	NA	NA	NA	NA	NA	NA
MPC	MPC_to_LMP	4930579P08Rik	FALSE	0.00149615	0.0286514	10.0833	1.58421	NA	NA	NA	NA	NA	NA	NA	NA	NA
MPC	MPC_to_LMP	Ctnna1	FALSE	0.00149892	0.0286791	10.0799	1.70314	NA	NA	NA	NA	NA	NA	NA	NA	NA
MPC	MPC_to_LMP	Phlda1	FALSE	0.00150148	0.0287029	10.0768	1.83275	NA	NA	NA	NA	NA	NA	NA	NA	NA
MPC	MPC_to_LMP	Epb41l3	FALSE	0.00150803	0.0287971	10.0688	3.73852	NA	NA	NA	NA	NA	NA	NA	NA	NA
MPC	MPC_to_LMP	Dlgap4	FALSE	0.00151008	0.0287971	10.0663	1.80422	NA	NA	NA	NA	NA	NA	NA	NA	NA
MPC	MPC_to_LMP	Clec2d	FALSE	0.00151036	0.0287971	10.0659	5.14068	NA	NA	NA	NA	NA	NA	NA	NA	NA
MPC	MPC_to_LMP	Mob4	FALSE	0.00151644	0.0288877	10.0585	1.66166	NA	NA	NA	NA	NA	NA	NA	NA	NA
MPC	MPC_to_LMP	1190002N15Rik	FALSE	0.00152447	0.0290155	10.0488	-1.92486	NA	NA	NA	NA	NA	NA	NA	NA	NA
MPC	MPC_to_LMP	Mapre1	FALSE	0.001536	0.0292094	10.0349	1.44203	NA	NA	NA	NA	NA	NA	NA	NA	NA
MPC	MPC_to_LMP	Rnf14	FALSE	0.00154046	0.0292532	10.0296	2.09607	NA	NA	NA	NA	NA	NA	NA	NA	NA
MPC	MPC_to_LMP	Sri	FALSE	0.00154098	0.0292532	10.029	1.52698	NA	NA	NA	NA	NA	NA	NA	NA	NA
MPC	MPC_to_LMP	Ptpn11	FALSE	0.00154587	0.0293205	10.0231	1.52771	NA	NA	NA	NA	NA	NA	NA	NA	NA
MPC	MPC_to_LMP	Nsmce3	FALSE	0.00154792	0.0293339	10.0207	1.72335	NA	NA	NA	NA	NA	NA	NA	NA	NA
MPC	MPC_to_LMP	Sf3b1	FALSE	0.00155719	0.029484	10.0097	1.19192	NA	NA	NA	NA	NA	NA	NA	NA	NA
MPC	MPC_to_LMP	Cd151	FALSE	0.0015592	0.0294965	10.0073	3.14883	NA	NA	NA	NA	NA	NA	NA	NA	NA
MPC	MPC_to_LMP	Me2	FALSE	0.00156207	0.0295021	10.0039	2.12156	NA	NA	NA	NA	NA	NA	NA	NA	NA
MPC	MPC_to_LMP	Pdgfc	FALSE	0.0015622	0.0295021	10.0038	2.26161	NA	NA	NA	NA	NA	NA	NA	NA	NA
MPC	MPC_to_LMP	Rbpms	FALSE	0.00156432	0.0295116	10.0013	3.05353	NA	NA	NA	NA	NA	NA	NA	NA	NA
MPC	MPC_to_LMP	Crbn	FALSE	0.00156541	0.0295116	9.99999	2.44697	NA	NA	NA	NA	NA	NA	NA	NA	NA
MPC	MPC_to_LMP	Plin3	FALSE	0.00156755	0.0295264	9.99748	2.28993	NA	NA	NA	NA	NA	NA	NA	NA	NA
MPC	MPC_to_LMP	Cers2	FALSE	0.00157035	0.0295538	9.99418	1.6047	NA	NA	NA	NA	NA	NA	NA	NA	NA
MPC	MPC_to_LMP	Dtwd1	FALSE	0.00158116	0.0297315	9.98156	3.42402	NA	NA	NA	NA	NA	NA	NA	NA	NA
MPC	MPC_to_LMP	Tnfrsf11b	FALSE	0.00158555	0.0297884	9.97645	3.90438	NA	NA	NA	NA	NA	NA	NA	NA	NA
MPC	MPC_to_LMP	Cul5	FALSE	0.00158882	0.0298243	9.97265	1.74777	NA	NA	NA	NA	NA	NA	NA	NA	NA
MPC	MPC_to_LMP	Ppp1r11	FALSE	0.00159044	0.0298288	9.97079	1.71247	NA	NA	NA	NA	NA	NA	NA	NA	NA
MPC	MPC_to_LMP	Mfge8	FALSE	0.00159631	0.0299133	9.964	1.60721	NA	NA	NA	NA	NA	NA	NA	NA	NA
MPC	MPC_to_LMP	Mcu	FALSE	0.00160293	0.0300116	9.95638	2.57126	NA	NA	NA	NA	NA	NA	NA	NA	NA
MPC	MPC_to_LMP	Ddx52	FALSE	0.00162144	0.0303321	9.93525	1.91684	NA	NA	NA	NA	NA	NA	NA	NA	NA
MPC	MPC_to_LMP	Abhd5	FALSE	0.00162617	0.0303946	9.92988	1.98928	NA	NA	NA	NA	NA	NA	NA	NA	NA
MPC	MPC_to_LMP	Ptpa	FALSE	0.00163223	0.0304819	9.92303	1.52244	NA	NA	NA	NA	NA	NA	NA	NA	NA
MPC	MPC_to_LMP	Layn	FALSE	0.00164101	0.0306195	9.91316	6.9386	NA	NA	NA	NA	NA	NA	NA	NA	NA
MPC	MPC_to_LMP	Ralgps2	FALSE	0.00165303	0.0308175	9.89973	-3.61861	NA	NA	NA	NA	NA	NA	NA	NA	NA
MPC	MPC_to_LMP	Naf1	FALSE	0.00165503	0.0308285	9.89751	2.50695	NA	NA	NA	NA	NA	NA	NA	NA	NA
MPC	MPC_to_LMP	Ncor1	FALSE	0.00165706	0.0308399	9.89525	1.271	NA	NA	NA	NA	NA	NA	NA	NA	NA
MPC	MPC_to_LMP	Metap2	FALSE	0.00166852	0.0310269	9.88256	1.24121	NA	NA	NA	NA	NA	NA	NA	NA	NA
MPC	MPC_to_LMP	Kdelr3	FALSE	0.0016733	0.0310671	9.8773	-1.16498	NA	NA	NA	NA	NA	NA	NA	NA	NA
MPC	MPC_to_LMP	Fam71a	FALSE	0.00167353	0.0310671	9.87705	-3.28802	NA	NA	NA	NA	NA	NA	NA	NA	NA
MPC	MPC_to_LMP	Ube2d2a	FALSE	0.00169306	0.0314029	9.8557	1.20093	NA	NA	NA	NA	NA	NA	NA	NA	NA
MPC	MPC_to_LMP	Itgb5	FALSE	0.0016983	0.0314658	9.85002	1.94887	NA	NA	NA	NA	NA	NA	NA	NA	NA
MPC	MPC_to_LMP	Mbnl1	FALSE	0.00169933	0.0314658	9.8489	1.45665	NA	NA	NA	NA	NA	NA	NA	NA	NA
MPC	MPC_to_LMP	Crebrf	FALSE	0.00171376	0.031706	9.83335	2.54572	NA	NA	NA	NA	NA	NA	NA	NA	NA
MPC	MPC_to_LMP	Gm17018	FALSE	0.00171523	0.0317063	9.83178	1.79387	NA	NA	NA	NA	NA	NA	NA	NA	NA
MPC	MPC_to_LMP	Prkaa1	FALSE	0.00172372	0.0318364	9.82269	2.65387	NA	NA	NA	NA	NA	NA	NA	NA	NA
MPC	MPC_to_LMP	Lamb2	FALSE	0.00173723	0.0320587	9.80834	-1.54998	NA	NA	NA	NA	NA	NA	NA	NA	NA
MPC	MPC_to_LMP	Polr2k	FALSE	0.00174243	0.0321198	9.80284	1.28241	NA	NA	NA	NA	NA	NA	NA	NA	NA
MPC	MPC_to_LMP	Dnajc13	FALSE	0.00174348	0.0321198	9.80173	2.49783	NA	NA	NA	NA	NA	NA	NA	NA	NA
MPC	MPC_to_LMP	Slc6a8	FALSE	0.00174614	0.0321332	9.79892	2.46255	NA	NA	NA	NA	NA	NA	NA	NA	NA
MPC	MPC_to_LMP	Snx1	FALSE	0.00174715	0.0321332	9.79786	1.72973	NA	NA	NA	NA	NA	NA	NA	NA	NA
MPC	MPC_to_LMP	Ift74	FALSE	0.00175043	0.0321664	9.79441	2.65996	NA	NA	NA	NA	NA	NA	NA	NA	NA
MPC	MPC_to_LMP	Uqcr10	FALSE	0.00175684	0.0322571	9.78768	1.04818	NA	NA	NA	NA	NA	NA	NA	NA	NA
MPC	MPC_to_LMP	Rras	FALSE	0.00176198	0.0323046	9.78232	2.22579	NA	NA	NA	NA	NA	NA	NA	NA	NA
MPC	MPC_to_LMP	Gm6634	FALSE	0.00176239	0.0323046	9.78189	10.0712	NA	NA	NA	NA	NA	NA	NA	NA	NA
MPC	MPC_to_LMP	Cd59a	FALSE	0.00176919	0.0323759	9.77481	-2.00536	NA	NA	NA	NA	NA	NA	NA	NA	NA
MPC	MPC_to_LMP	Sulf2	FALSE	0.0017705	0.0323759	9.77345	3.80085	NA	NA	NA	NA	NA	NA	NA	NA	NA
MPC	MPC_to_LMP	Ube2r2	FALSE	0.00177209	0.0323759	9.7718	1.45404	NA	NA	NA	NA	NA	NA	NA	NA	NA
MPC	MPC_to_LMP	Dcxr	FALSE	0.00177221	0.0323759	9.77167	1.72362	NA	NA	NA	NA	NA	NA	NA	NA	NA
MPC	MPC_to_LMP	Trappc4	FALSE	0.0017849	0.0325805	9.75855	1.56345	NA	NA	NA	NA	NA	NA	NA	NA	NA
MPC	MPC_to_LMP	Pfdn4	FALSE	0.00179801	0.0327922	9.74511	1.50459	NA	NA	NA	NA	NA	NA	NA	NA	NA
MPC	MPC_to_LMP	Gzme	FALSE	0.00180906	0.0329663	9.73384	4.75652	NA	NA	NA	NA	NA	NA	NA	NA	NA
MPC	MPC_to_LMP	U2af2	FALSE	0.00181237	0.032999	9.73049	1.68976	NA	NA	NA	NA	NA	NA	NA	NA	NA
MPC	MPC_to_LMP	Ptgfr	FALSE	0.00181899	0.033092	9.72378	5.12668	NA	NA	NA	NA	NA	NA	NA	NA	NA
MPC	MPC_to_LMP	Cwc27	FALSE	0.0018218	0.0331155	9.72094	2.33741	NA	NA	NA	NA	NA	NA	NA	NA	NA
MPC	MPC_to_LMP	Itm2a	FALSE	0.00182451	0.0331372	9.71821	2.30049	NA	NA	NA	NA	NA	NA	NA	NA	NA
MPC	MPC_to_LMP	Psmd5	FALSE	0.00183683	0.0333332	9.70585	2.56166	NA	NA	NA	NA	NA	NA	NA	NA	NA
MPC	MPC_to_LMP	Prkab1	FALSE	0.00184215	0.033402	9.70053	2.50466	NA	NA	NA	NA	NA	NA	NA	NA	NA
MPC	MPC_to_LMP	Actb	FALSE	0.00184946	0.0335067	9.69325	0.934033	NA	NA	NA	NA	NA	NA	NA	NA	NA
MPC	MPC_to_LMP	Megf6	FALSE	0.00186954	0.0338424	9.67341	-2.64201	NA	NA	NA	NA	NA	NA	NA	NA	NA
MPC	MPC_to_LMP	Ppan	FALSE	0.00191424	0.0346228	9.63001	2.25634	NA	NA	NA	NA	NA	NA	NA	NA	NA
MPC	MPC_to_LMP	Slc38a7	FALSE	0.00192119	0.0347199	9.62335	4.03706	NA	NA	NA	NA	NA	NA	NA	NA	NA
MPC	MPC_to_LMP	Kitl	FALSE	0.0019291	0.034834	9.6158	2.55947	NA	NA	NA	NA	NA	NA	NA	NA	NA
MPC	MPC_to_LMP	Gtf2f2	FALSE	0.00193983	0.0349986	9.60562	3.14585	NA	NA	NA	NA	NA	NA	NA	NA	NA
MPC	MPC_to_LMP	Nfic	FALSE	0.00194799	0.0351169	9.59791	1.65913	NA	NA	NA	NA	NA	NA	NA	NA	NA
MPC	MPC_to_LMP	Srrm2	FALSE	0.00196009	0.0352993	9.58654	1.15056	NA	NA	NA	NA	NA	NA	NA	NA	NA
MPC	MPC_to_LMP	Ttc27	FALSE	0.00196134	0.0352993	9.58537	2.9037	NA	NA	NA	NA	NA	NA	NA	NA	NA
MPC	MPC_to_LMP	Ndufb10	FALSE	0.00196648	0.0353489	9.58057	1.08877	NA	NA	NA	NA	NA	NA	NA	NA	NA
MPC	MPC_to_LMP	Wars	FALSE	0.00196733	0.0353489	9.57977	2.74628	NA	NA	NA	NA	NA	NA	NA	NA	NA
MPC	MPC_to_LMP	Pcolce2	FALSE	0.00197936	0.0355357	9.56858	-2.49933	NA	NA	NA	NA	NA	NA	NA	NA	NA
MPC	MPC_to_LMP	Vdac2	FALSE	0.00198866	0.0356733	9.55997	1.13683	NA	NA	NA	NA	NA	NA	NA	NA	NA
MPC	MPC_to_LMP	Erp29	FALSE	0.00199049	0.0356769	9.55828	-1.07359	NA	NA	NA	NA	NA	NA	NA	NA	NA
MPC	MPC_to_LMP	Rpp38	FALSE	0.00200969	0.0359913	9.54067	3.36181	NA	NA	NA	NA	NA	NA	NA	NA	NA
MPC	MPC_to_LMP	Nle1	FALSE	0.00201176	0.0359989	9.53878	2.8833	NA	NA	NA	NA	NA	NA	NA	NA	NA
MPC	MPC_to_LMP	Ttc1	FALSE	0.00202221	0.0361497	9.52927	1.92103	NA	NA	NA	NA	NA	NA	NA	NA	NA
MPC	MPC_to_LMP	Arpc5l	FALSE	0.00202349	0.0361497	9.5281	1.50804	NA	NA	NA	NA	NA	NA	NA	NA	NA
MPC	MPC_to_LMP	Dkk1	FALSE	0.00203842	0.0363865	9.51462	-4.06987	NA	NA	NA	NA	NA	NA	NA	NA	NA
MPC	MPC_to_LMP	Mmp23	FALSE	0.00204973	0.0365586	9.50446	-1.24192	NA	NA	NA	NA	NA	NA	NA	NA	NA
MPC	MPC_to_LMP	2023-03-05	FALSE	0.00205368	0.0365991	9.50093	1.45405	NA	NA	NA	NA	NA	NA	NA	NA	NA
MPC	MPC_to_LMP	Cacng1	FALSE	0.00205719	0.0366317	9.4978	2.53708	NA	NA	NA	NA	NA	NA	NA	NA	NA
MPC	MPC_to_LMP	Dmap1	FALSE	0.00207384	0.0368982	9.483	2.56757	NA	NA	NA	NA	NA	NA	NA	NA	NA
MPC	MPC_to_LMP	Mea1	FALSE	0.00208801	0.03712	9.47051	1.91072	NA	NA	NA	NA	NA	NA	NA	NA	NA
MPC	MPC_to_LMP	Ube2n	FALSE	0.00209084	0.03714	9.46803	1.34487	NA	NA	NA	NA	NA	NA	NA	NA	NA
MPC	MPC_to_LMP	Rbm8a	FALSE	0.00210132	0.0372852	9.45886	1.20408	NA	NA	NA	NA	NA	NA	NA	NA	NA
MPC	MPC_to_LMP	Ptp4a2	FALSE	0.00210243	0.0372852	9.45789	1.26533	NA	NA	NA	NA	NA	NA	NA	NA	NA
MPC	MPC_to_LMP	Nlk	FALSE	0.00211863	0.0375132	9.44381	3.01092	NA	NA	NA	NA	NA	NA	NA	NA	NA
MPC	MPC_to_LMP	Usp14	FALSE	0.00211964	0.0375132	9.44293	1.80843	NA	NA	NA	NA	NA	NA	NA	NA	NA
MPC	MPC_to_LMP	Chchd1	FALSE	0.00212044	0.0375132	9.44225	1.2362	NA	NA	NA	NA	NA	NA	NA	NA	NA
MPC	MPC_to_LMP	Ccdc59	FALSE	0.00213626	0.0377626	9.42861	1.41772	NA	NA	NA	NA	NA	NA	NA	NA	NA
MPC	MPC_to_LMP	Hacd2	FALSE	0.00214039	0.0378049	9.42507	1.6478	NA	NA	NA	NA	NA	NA	NA	NA	NA
MPC	MPC_to_LMP	Trpm7	FALSE	0.00215313	0.0379992	9.41419	1.40137	NA	NA	NA	NA	NA	NA	NA	NA	NA
MPC	MPC_to_LMP	Svil	FALSE	0.00215643	0.0380267	9.41138	3.0478	NA	NA	NA	NA	NA	NA	NA	NA	NA
MPC	MPC_to_LMP	Trim26	FALSE	0.00216062	0.0380395	9.40782	2.73426	NA	NA	NA	NA	NA	NA	NA	NA	NA
MPC	MPC_to_LMP	Capns1	FALSE	0.00216064	0.0380395	9.4078	1.28883	NA	NA	NA	NA	NA	NA	NA	NA	NA
MPC	MPC_to_LMP	Kif5b	FALSE	0.00218288	0.0384	9.38903	1.27599	NA	NA	NA	NA	NA	NA	NA	NA	NA
MPC	MPC_to_LMP	Ndufa10	FALSE	0.00219472	0.0385772	9.37911	1.41731	NA	NA	NA	NA	NA	NA	NA	NA	NA
MPC	MPC_to_LMP	Arpc4	FALSE	0.00223684	0.039275	9.34427	1.43064	NA	NA	NA	NA	NA	NA	NA	NA	NA
MPC	MPC_to_LMP	Gpx4	FALSE	0.00223801	0.039275	9.34331	0.948429	NA	NA	NA	NA	NA	NA	NA	NA	NA
MPC	MPC_to_LMP	Pdk4	FALSE	0.00224033	0.0392841	9.34141	2.31582	NA	NA	NA	NA	NA	NA	NA	NA	NA
MPC	MPC_to_LMP	Cnn3	FALSE	0.00226713	0.0397221	9.31962	1.84898	NA	NA	NA	NA	NA	NA	NA	NA	NA
MPC	MPC_to_LMP	BC003965	FALSE	0.00227182	0.0397724	9.31583	1.86481	NA	NA	NA	NA	NA	NA	NA	NA	NA
MPC	MPC_to_LMP	Nqo2	FALSE	0.00228232	0.0399241	9.30739	3.8228	NA	NA	NA	NA	NA	NA	NA	NA	NA
MPC	MPC_to_LMP	Vps35	FALSE	0.00229437	0.0401027	9.29774	1.53968	NA	NA	NA	NA	NA	NA	NA	NA	NA
MPC	MPC_to_LMP	Sf3a2	FALSE	0.00229834	0.0401102	9.29457	2.27235	NA	NA	NA	NA	NA	NA	NA	NA	NA
MPC	MPC_to_LMP	Kcnf1	FALSE	0.00229847	0.0401102	9.29447	5.85126	NA	NA	NA	NA	NA	NA	NA	NA	NA
MPC	MPC_to_LMP	Aimp2	FALSE	0.00230079	0.0401187	9.29262	1.73613	NA	NA	NA	NA	NA	NA	NA	NA	NA
MPC	MPC_to_LMP	Rab7	FALSE	0.00230334	0.040131	9.29059	1.29565	NA	NA	NA	NA	NA	NA	NA	NA	NA
MPC	MPC_to_LMP	Dlg5	FALSE	0.00230889	0.0401956	9.28619	2.78508	NA	NA	NA	NA	NA	NA	NA	NA	NA
MPC	MPC_to_LMP	4833427G06Rik	FALSE	0.00231775	0.0403179	9.27916	5.04617	NA	NA	NA	NA	NA	NA	NA	NA	NA
MPC	MPC_to_LMP	Glis2	FALSE	0.00234185	0.0406754	9.26022	3.15088	NA	NA	NA	NA	NA	NA	NA	NA	NA
MPC	MPC_to_LMP	Hmgcl	FALSE	0.00234204	0.0406754	9.26007	2.09845	NA	NA	NA	NA	NA	NA	NA	NA	NA
MPC	MPC_to_LMP	Slc6a2	FALSE	0.00235293	0.0408321	9.25157	-4.79087	NA	NA	NA	NA	NA	NA	NA	NA	NA
MPC	MPC_to_LMP	Nr1d1	FALSE	0.002358	0.0408793	9.24763	2.60744	NA	NA	NA	NA	NA	NA	NA	NA	NA
MPC	MPC_to_LMP	Cfl2	FALSE	0.00235939	0.0408793	9.24655	1.83548	NA	NA	NA	NA	NA	NA	NA	NA	NA
MPC	MPC_to_LMP	Atp5c1	FALSE	0.00236921	0.0410168	9.23895	1.00075	NA	NA	NA	NA	NA	NA	NA	NA	NA
MPC	MPC_to_LMP	Shmt1	FALSE	0.00237117	0.0410183	9.23743	4.96778	NA	NA	NA	NA	NA	NA	NA	NA	NA
MPC	MPC_to_LMP	Pphln1	FALSE	0.0023805	0.0411471	9.23024	2.05534	NA	NA	NA	NA	NA	NA	NA	NA	NA
MPC	MPC_to_LMP	Grb14	FALSE	0.00238634	0.0412154	9.22575	2.45832	NA	NA	NA	NA	NA	NA	NA	NA	NA
MPC	MPC_to_LMP	Zc2hc1a	FALSE	0.00240181	0.0414498	9.21393	2.55275	NA	NA	NA	NA	NA	NA	NA	NA	NA
MPC	MPC_to_LMP	Ndufaf6	FALSE	0.00240466	0.0414661	9.21176	2.82354	NA	NA	NA	NA	NA	NA	NA	NA	NA
MPC	MPC_to_LMP	Mrpl23	FALSE	0.00240951	0.0415169	9.20807	1.13811	NA	NA	NA	NA	NA	NA	NA	NA	NA
MPC	MPC_to_LMP	Rabgap1	FALSE	0.00241513	0.041581	9.2038	1.99885	NA	NA	NA	NA	NA	NA	NA	NA	NA
MPC	MPC_to_LMP	Ntmt1	FALSE	0.00242295	0.0416605	9.19789	1.78124	NA	NA	NA	NA	NA	NA	NA	NA	NA
MPC	MPC_to_LMP	Cwc15	FALSE	0.00242357	0.0416605	9.19742	1.33442	NA	NA	NA	NA	NA	NA	NA	NA	NA
MPC	MPC_to_LMP	Prpf4b	FALSE	0.00242578	0.0416657	9.19575	1.2755	NA	NA	NA	NA	NA	NA	NA	NA	NA
MPC	MPC_to_LMP	Tmem120a	FALSE	0.0024328	0.0417536	9.19046	2.09902	NA	NA	NA	NA	NA	NA	NA	NA	NA
MPC	MPC_to_LMP	Zwint	FALSE	0.00243488	0.0417564	9.18889	1.72999	NA	NA	NA	NA	NA	NA	NA	NA	NA
MPC	MPC_to_LMP	Dclk1	FALSE	0.00244388	0.0418778	9.18214	2.98296	NA	NA	NA	NA	NA	NA	NA	NA	NA
MPC	MPC_to_LMP	Prdx4	FALSE	0.00247166	0.0423207	9.16145	-1.21417	NA	NA	NA	NA	NA	NA	NA	NA	NA
MPC	MPC_to_LMP	Scarf2	FALSE	0.00250533	0.0428635	9.1367	1.73786	NA	NA	NA	NA	NA	NA	NA	NA	NA
MPC	MPC_to_LMP	Wdr46	FALSE	0.00251659	0.0430225	9.12849	2.84502	NA	NA	NA	NA	NA	NA	NA	NA	NA
MPC	MPC_to_LMP	Hspa14	FALSE	0.00252638	0.0431425	9.12139	1.84765	NA	NA	NA	NA	NA	NA	NA	NA	NA
MPC	MPC_to_LMP	Usp19	FALSE	0.00252756	0.0431425	9.12053	2.02671	NA	NA	NA	NA	NA	NA	NA	NA	NA
MPC	MPC_to_LMP	Gsdmd	FALSE	0.00253191	0.0431445	9.11739	3.24342	NA	NA	NA	NA	NA	NA	NA	NA	NA
MPC	MPC_to_LMP	Wdr18	FALSE	0.00253199	0.0431445	9.11733	1.90562	NA	NA	NA	NA	NA	NA	NA	NA	NA
MPC	MPC_to_LMP	Ebf1	FALSE	0.00253361	0.0431445	9.11616	1.56717	NA	NA	NA	NA	NA	NA	NA	NA	NA
MPC	MPC_to_LMP	Pdcd2	FALSE	0.00253638	0.043158	9.11416	2.19357	NA	NA	NA	NA	NA	NA	NA	NA	NA
MPC	MPC_to_LMP	Fam104a	FALSE	0.00254096	0.0432022	9.11086	1.19944	NA	NA	NA	NA	NA	NA	NA	NA	NA
MPC	MPC_to_LMP	Dram1	FALSE	0.00254611	0.0432561	9.10716	3.5527	NA	NA	NA	NA	NA	NA	NA	NA	NA
MPC	MPC_to_LMP	Dhps	FALSE	0.00255848	0.0434325	9.09829	1.99795	NA	NA	NA	NA	NA	NA	NA	NA	NA
MPC	MPC_to_LMP	Kif3a	FALSE	0.00257562	0.0436895	9.08608	2.93652	NA	NA	NA	NA	NA	NA	NA	NA	NA
MPC	MPC_to_LMP	Pdha1	FALSE	0.00257785	0.0436933	9.0845	1.42517	NA	NA	NA	NA	NA	NA	NA	NA	NA
MPC	MPC_to_LMP	Nol7	FALSE	0.00258338	0.0437532	9.08058	1.33501	NA	NA	NA	NA	NA	NA	NA	NA	NA
MPC	MPC_to_LMP	Tacc2	FALSE	0.00260393	0.0440669	9.06609	2.88289	NA	NA	NA	NA	NA	NA	NA	NA	NA
MPC	MPC_to_LMP	Ddx41	FALSE	0.00263056	0.0444832	9.04749	1.9977	NA	NA	NA	NA	NA	NA	NA	NA	NA
MPC	MPC_to_LMP	Gspt1	FALSE	0.00263645	0.0445483	9.0434	1.40447	NA	NA	NA	NA	NA	NA	NA	NA	NA
MPC	MPC_to_LMP	Csnk1a1	FALSE	0.00264235	0.0446037	9.03931	1.08985	NA	NA	NA	NA	NA	NA	NA	NA	NA
MPC	MPC_to_LMP	Arid4a	FALSE	0.00264382	0.0446037	9.0383	2.07004	NA	NA	NA	NA	NA	NA	NA	NA	NA
MPC	MPC_to_LMP	Ipo7	FALSE	0.00264698	0.0446225	9.03612	1.7428	NA	NA	NA	NA	NA	NA	NA	NA	NA
MPC	MPC_to_LMP	Pold2	FALSE	0.00265347	0.0446911	9.03164	2.55001	NA	NA	NA	NA	NA	NA	NA	NA	NA
MPC	MPC_to_LMP	Ddx39b	FALSE	0.00265514	0.0446911	9.03049	1.28193	NA	NA	NA	NA	NA	NA	NA	NA	NA
MPC	MPC_to_LMP	Cenpv	FALSE	0.00266625	0.0448435	9.02285	2.62176	NA	NA	NA	NA	NA	NA	NA	NA	NA
MPC	MPC_to_LMP	Hrc	FALSE	0.00267938	0.0450298	9.01387	-4.49192	NA	NA	NA	NA	NA	NA	NA	NA	NA
MPC	MPC_to_LMP	Rbx1	FALSE	0.00268311	0.0450483	9.01133	1.03091	NA	NA	NA	NA	NA	NA	NA	NA	NA
MPC	MPC_to_LMP	Uqcc2	FALSE	0.00268461	0.0450483	9.01031	1.08919	NA	NA	NA	NA	NA	NA	NA	NA	NA
MPC	MPC_to_LMP	Pgpep1	FALSE	0.0026898	0.0451006	9.00678	3.00031	NA	NA	NA	NA	NA	NA	NA	NA	NA
MPC	MPC_to_LMP	Slc39a6	FALSE	0.00269226	0.0451072	9.00511	2.32271	NA	NA	NA	NA	NA	NA	NA	NA	NA
MPC	MPC_to_LMP	Tgfbr3	FALSE	0.00269809	0.0451703	9.00115	2.76185	NA	NA	NA	NA	NA	NA	NA	NA	NA
MPC	MPC_to_LMP	Pno1	FALSE	0.0027029	0.045216	8.9979	2.0331	NA	NA	NA	NA	NA	NA	NA	NA	NA
MPC	MPC_to_LMP	Psme3	FALSE	0.00271454	0.045376	8.99005	1.84786	NA	NA	NA	NA	NA	NA	NA	NA	NA
MPC	MPC_to_LMP	Dync1li2	FALSE	0.00271916	0.0454184	8.98694	1.63979	NA	NA	NA	NA	NA	NA	NA	NA	NA
MPC	MPC_to_LMP	Fmc1	FALSE	0.00273277	0.0455778	8.97782	2.06108	NA	NA	NA	NA	NA	NA	NA	NA	NA
MPC	MPC_to_LMP	Ppp1cc	FALSE	0.00273287	0.0455778	8.97775	1.34722	NA	NA	NA	NA	NA	NA	NA	NA	NA
MPC	MPC_to_LMP	Xrn2	FALSE	0.00273627	0.0455997	8.97548	1.49597	NA	NA	NA	NA	NA	NA	NA	NA	NA
MPC	MPC_to_LMP	Mnat1	FALSE	0.00274886	0.0457442	8.96709	1.48737	NA	NA	NA	NA	NA	NA	NA	NA	NA
MPC	MPC_to_LMP	Glo1	FALSE	0.00274914	0.0457442	8.96691	1.35785	NA	NA	NA	NA	NA	NA	NA	NA	NA
MPC	MPC_to_LMP	Hmgcr	FALSE	0.0027682	0.0460264	8.95428	2.1262	NA	NA	NA	NA	NA	NA	NA	NA	NA
MPC	MPC_to_LMP	Scd1	FALSE	0.00278106	0.0462049	8.94582	-1.54172	NA	NA	NA	NA	NA	NA	NA	NA	NA
MPC	MPC_to_LMP	Stat6	FALSE	0.00278733	0.0462739	8.9417	2.26183	NA	NA	NA	NA	NA	NA	NA	NA	NA
MPC	MPC_to_LMP	Ikbip	FALSE	0.00280697	0.0465646	8.92887	-1.44714	NA	NA	NA	NA	NA	NA	NA	NA	NA
MPC	MPC_to_LMP	Gnl2	FALSE	0.00281183	0.0466097	8.92572	2.17198	NA	NA	NA	NA	NA	NA	NA	NA	NA
MPC	MPC_to_LMP	Orai3	FALSE	0.00281679	0.0466566	8.9225	2.89009	NA	NA	NA	NA	NA	NA	NA	NA	NA
MPC	MPC_to_LMP	Col6a1	FALSE	0.00282048	0.0466608	8.92011	1.65214	NA	NA	NA	NA	NA	NA	NA	NA	NA
MPC	MPC_to_LMP	Nars	FALSE	0.00282218	0.0466608	8.91901	1.23167	NA	NA	NA	NA	NA	NA	NA	NA	NA
MPC	MPC_to_LMP	Adi1	FALSE	0.00282346	0.0466608	8.91818	2.99999	NA	NA	NA	NA	NA	NA	NA	NA	NA
MPC	MPC_to_LMP	Nsa2	FALSE	0.00282627	0.0466719	8.91636	1.22491	NA	NA	NA	NA	NA	NA	NA	NA	NA
MPC	MPC_to_LMP	Rplp1	FALSE	0.00283042	0.0467051	8.91368	0.827561	NA	NA	NA	NA	NA	NA	NA	NA	NA
MPC	MPC_to_LMP	Plod1	FALSE	0.00284475	0.0469061	8.90446	-1.55868	NA	NA	NA	NA	NA	NA	NA	NA	NA
MPC	MPC_to_LMP	Prr7	FALSE	0.00286777	0.0472501	8.88974	2.35068	NA	NA	NA	NA	NA	NA	NA	NA	NA
MPC	MPC_to_LMP	Alkbh7	FALSE	0.00287064	0.0472616	8.88792	2.76504	NA	NA	NA	NA	NA	NA	NA	NA	NA
MPC	MPC_to_LMP	Heatr1	FALSE	0.0028765	0.0472956	8.8842	2.82341	NA	NA	NA	NA	NA	NA	NA	NA	NA
MPC	MPC_to_LMP	Qdpr	FALSE	0.00287888	0.0472956	8.88268	1.88521	NA	NA	NA	NA	NA	NA	NA	NA	NA
MPC	MPC_to_LMP	Nub1	FALSE	0.0028792	0.0472956	8.88248	2.14945	NA	NA	NA	NA	NA	NA	NA	NA	NA
MPC	MPC_to_LMP	Slc35e3	FALSE	0.00288201	0.0473061	8.8807	3.48152	NA	NA	NA	NA	NA	NA	NA	NA	NA
MPC	MPC_to_LMP	Psmf1	FALSE	0.00288895	0.0473844	8.87631	2.15165	NA	NA	NA	NA	NA	NA	NA	NA	NA
MPC	MPC_to_LMP	Spout1	FALSE	0.00290284	0.0475765	8.86755	2.27718	NA	NA	NA	NA	NA	NA	NA	NA	NA
MPC	MPC_to_LMP	Ssr2	FALSE	0.00291376	0.0476848	8.8607	-1.09016	NA	NA	NA	NA	NA	NA	NA	NA	NA
MPC	MPC_to_LMP	Carm1	FALSE	0.00291382	0.0476848	8.86066	2.58143	NA	NA	NA	NA	NA	NA	NA	NA	NA
MPC	MPC_to_LMP	Brd1	FALSE	0.00292749	0.0478727	8.85212	1.52173	NA	NA	NA	NA	NA	NA	NA	NA	NA
MPC	MPC_to_LMP	Slco2b1	FALSE	0.00296103	0.048385	8.83132	6.55343	NA	NA	NA	NA	NA	NA	NA	NA	NA
MPC	MPC_to_LMP	Pgrmc1	FALSE	0.00296875	0.0484633	8.82657	1.35522	NA	NA	NA	NA	NA	NA	NA	NA	NA
MPC	MPC_to_LMP	Supt20	FALSE	0.00297027	0.0484633	8.82564	2.57329	NA	NA	NA	NA	NA	NA	NA	NA	NA
MPC	MPC_to_LMP	Smc6	FALSE	0.0029754	0.0485105	8.82249	1.66562	NA	NA	NA	NA	NA	NA	NA	NA	NA
MPC	MPC_to_LMP	Rpl34	FALSE	0.0029776	0.0485105	8.82114	0.828883	NA	NA	NA	NA	NA	NA	NA	NA	NA
MPC	MPC_to_LMP	Fip1l1	FALSE	0.00300039	0.0488453	8.80723	1.63239	NA	NA	NA	NA	NA	NA	NA	NA	NA
MPC	MPC_to_LMP	Pold1	FALSE	0.00300746	0.0489076	8.80294	5.17559	NA	NA	NA	NA	NA	NA	NA	NA	NA
MPC	MPC_to_LMP	Fabp3	FALSE	0.0030087	0.0489076	8.80218	-1.63881	NA	NA	NA	NA	NA	NA	NA	NA	NA
MPC	MPC_to_LMP	Ndufa8	FALSE	0.00302405	0.0491199	8.7929	1.08249	NA	NA	NA	NA	NA	NA	NA	NA	NA
MPC	MPC_to_LMP	Srsf7	FALSE	0.00302626	0.0491199	8.79157	1.64492	NA	NA	NA	NA	NA	NA	NA	NA	NA
MPC	MPC_to_LMP	Fam120a	FALSE	0.00305068	0.0494795	8.77691	1.27802	NA	NA	NA	NA	NA	NA	NA	NA	NA
MPC	MPC_to_LMP	Nacc2	FALSE	0.00305695	0.0495443	8.77316	3.57463	NA	NA	NA	NA	NA	NA	NA	NA	NA
MPC	MPC_to_LMP	mt-Co2	FALSE	0.00306767	0.0496684	8.76677	0.916493	NA	NA	NA	NA	NA	NA	NA	NA	NA
MPC	MPC_to_LMP	Eif3b	FALSE	0.00306916	0.0496684	8.76589	1.41193	NA	NA	NA	NA	NA	NA	NA	NA	NA
MPC	MPC_to_LMP	Drap1	FALSE	0.00307788	0.0497727	8.76072	1.17951	NA	NA	NA	NA	NA	NA	NA	NA	NA
MPC	MPC_to_LMP	Akr1b8	FALSE	0.00308757	0.0498749	8.75499	2.49581	NA	NA	NA	NA	NA	NA	NA	NA	NA
MPC	MPC_to_LMP	Abtb2	FALSE	0.00308877	0.0498749	8.75428	0.727011	NA	NA	NA	NA	NA	NA	NA	NA	NA
MPC	MPC_to_LMP	Psmd11	FALSE	0.00309335	0.049912	8.75157	1.54026	NA	NA	NA	NA	NA	NA	NA	NA	NA
OB1	OB1_to_Ocy	Prnp	TRUE	7.06e-07	6.37e-05	24.5982	0.585503	2	131.00250199999999	14.271810159999999	129.56928099999999	131.88985	+	131909928	131956130	907426
OB1	OB1_to_Ocy	Plpp1	FALSE	0	0	442.284	2.01739	NA	NA	NA	NA	NA	NA	NA	NA	NA
OB1	OB1_to_Ocy	Mxra8	FALSE	0	0	306.399	-1.60968	NA	NA	NA	NA	NA	NA	NA	NA	NA
OB1	OB1_to_Ocy	Omd	FALSE	0	0	296.45	-2.47234	NA	NA	NA	NA	NA	NA	NA	NA	NA
OB1	OB1_to_Ocy	Dock9	FALSE	0	0	276.439	2.18044	NA	NA	NA	NA	NA	NA	NA	NA	NA
OB1	OB1_to_Ocy	C430049E01Rik	FALSE	0	0	230.808	1.59468	NA	NA	NA	NA	NA	NA	NA	NA	NA
OB1	OB1_to_Ocy	Ccnd1	FALSE	0	0	225.157	-1.40537	NA	NA	NA	NA	NA	NA	NA	NA	NA
OB1	OB1_to_Ocy	Cdh2	FALSE	0	0	205.905	-1.21676	NA	NA	NA	NA	NA	NA	NA	NA	NA
OB1	OB1_to_Ocy	Gsn	FALSE	0	0	187.393	-0.917585	NA	NA	NA	NA	NA	NA	NA	NA	NA
OB1	OB1_to_Ocy	Cd109	FALSE	0	0	174.202	0.963144	NA	NA	NA	NA	NA	NA	NA	NA	NA
OB1	OB1_to_Ocy	Spp1	FALSE	0	0	173.285	-1.15541	NA	NA	NA	NA	NA	NA	NA	NA	NA
OB1	OB1_to_Ocy	Col12a1	FALSE	0	0	167.608	-1.65669	NA	NA	NA	NA	NA	NA	NA	NA	NA
OB1	OB1_to_Ocy	Cd44	FALSE	0	0	165.504	1.20115	NA	NA	NA	NA	NA	NA	NA	NA	NA
OB1	OB1_to_Ocy	Sfrp2	FALSE	0	0	165.377	-2.24929	NA	NA	NA	NA	NA	NA	NA	NA	NA
OB1	OB1_to_Ocy	Ddit4l	FALSE	0	0	162.309	1.4277	NA	NA	NA	NA	NA	NA	NA	NA	NA
OB1	OB1_to_Ocy	Ptprz1	FALSE	0	0	150.7	1.09411	NA	NA	NA	NA	NA	NA	NA	NA	NA
OB1	OB1_to_Ocy	Gal	FALSE	0	0	148.19	1.50567	NA	NA	NA	NA	NA	NA	NA	NA	NA
OB1	OB1_to_Ocy	Wasl	FALSE	0	0	147.122	0.916561	NA	NA	NA	NA	NA	NA	NA	NA	NA
OB1	OB1_to_Ocy	Lgr6	FALSE	0	0	144.932	1.62022	NA	NA	NA	NA	NA	NA	NA	NA	NA
OB1	OB1_to_Ocy	Tmem119	FALSE	0	0	128.45	-1.08435	NA	NA	NA	NA	NA	NA	NA	NA	NA
OB1	OB1_to_Ocy	Sema5a	FALSE	0	0	127.693	1.2035	NA	NA	NA	NA	NA	NA	NA	NA	NA
OB1	OB1_to_Ocy	Srpx2	FALSE	0	0	126.497	-0.967171	NA	NA	NA	NA	NA	NA	NA	NA	NA
OB1	OB1_to_Ocy	Ptprd	FALSE	0	0	125.428	-1.00698	NA	NA	NA	NA	NA	NA	NA	NA	NA
OB1	OB1_to_Ocy	Mepe	FALSE	0	0	124.261	1.89783	NA	NA	NA	NA	NA	NA	NA	NA	NA
OB1	OB1_to_Ocy	Ociad2	FALSE	0	0	123.013	1.6934	NA	NA	NA	NA	NA	NA	NA	NA	NA
OB1	OB1_to_Ocy	Prrx1	FALSE	0	0	122.525	-0.970888	NA	NA	NA	NA	NA	NA	NA	NA	NA
OB1	OB1_to_Ocy	Mmp16	FALSE	0	0	120.819	-2.0916	NA	NA	NA	NA	NA	NA	NA	NA	NA
OB1	OB1_to_Ocy	S1pr3	FALSE	0	0	119.893	-1.84524	NA	NA	NA	NA	NA	NA	NA	NA	NA
OB1	OB1_to_Ocy	Comp	FALSE	0	0	114.509	2.40136	NA	NA	NA	NA	NA	NA	NA	NA	NA
OB1	OB1_to_Ocy	Asrgl1	FALSE	0	0	114.065	1.12372	NA	NA	NA	NA	NA	NA	NA	NA	NA
OB1	OB1_to_Ocy	Sost	FALSE	0	0	113.578	2.23732	NA	NA	NA	NA	NA	NA	NA	NA	NA
OB1	OB1_to_Ocy	Fads1	FALSE	0	0	111.633	-1.38201	NA	NA	NA	NA	NA	NA	NA	NA	NA
OB1	OB1_to_Ocy	Prr15	FALSE	0	0	110.94	1.67946	NA	NA	NA	NA	NA	NA	NA	NA	NA
OB1	OB1_to_Ocy	Hmox1	FALSE	0	0	110.686	0.995023	NA	NA	NA	NA	NA	NA	NA	NA	NA
OB1	OB1_to_Ocy	Tmem97	FALSE	0	0	108.512	-0.988031	NA	NA	NA	NA	NA	NA	NA	NA	NA
OB1	OB1_to_Ocy	Anxa8	FALSE	0	0	107.593	2.58034	NA	NA	NA	NA	NA	NA	NA	NA	NA
OB1	OB1_to_Ocy	Loxl4	FALSE	0	0	103.534	1.01891	NA	NA	NA	NA	NA	NA	NA	NA	NA
OB1	OB1_to_Ocy	Tmed3	FALSE	0	0	101.853	-0.737825	NA	NA	NA	NA	NA	NA	NA	NA	NA
OB1	OB1_to_Ocy	Rap1gap	FALSE	0	0	99.6995	-1.74181	NA	NA	NA	NA	NA	NA	NA	NA	NA
OB1	OB1_to_Ocy	Wnk4	FALSE	0	0	99.3257	1.78512	NA	NA	NA	NA	NA	NA	NA	NA	NA
OB1	OB1_to_Ocy	Phex	FALSE	0	0	99.059	1.17533	NA	NA	NA	NA	NA	NA	NA	NA	NA
OB1	OB1_to_Ocy	Stc2	FALSE	0	0	99.0311	1.10583	NA	NA	NA	NA	NA	NA	NA	NA	NA
OB1	OB1_to_Ocy	Lyst	FALSE	0	0	98.9738	0.976449	NA	NA	NA	NA	NA	NA	NA	NA	NA
OB1	OB1_to_Ocy	Car12	FALSE	0	0	98.6165	1.00765	NA	NA	NA	NA	NA	NA	NA	NA	NA
OB1	OB1_to_Ocy	Chmp4c	FALSE	0	0	95.2176	1.31302	NA	NA	NA	NA	NA	NA	NA	NA	NA
OB1	OB1_to_Ocy	Twist1	FALSE	0	0	94.7795	-1.01959	NA	NA	NA	NA	NA	NA	NA	NA	NA
OB1	OB1_to_Ocy	Tnn	FALSE	0	0	93.2228	-1.43474	NA	NA	NA	NA	NA	NA	NA	NA	NA
OB1	OB1_to_Ocy	Ackr3	FALSE	0	0	90.6206	0.8878	NA	NA	NA	NA	NA	NA	NA	NA	NA
OB1	OB1_to_Ocy	Ddr2	FALSE	0	0	87.0013	-0.863759	NA	NA	NA	NA	NA	NA	NA	NA	NA
OB1	OB1_to_Ocy	Ripor3	FALSE	0	0	84.4564	2.44408	NA	NA	NA	NA	NA	NA	NA	NA	NA
OB1	OB1_to_Ocy	Fat3	FALSE	0	0	83.1418	-1.19814	NA	NA	NA	NA	NA	NA	NA	NA	NA
OB1	OB1_to_Ocy	Strbp	FALSE	0	0	82.9949	1.63855	NA	NA	NA	NA	NA	NA	NA	NA	NA
OB1	OB1_to_Ocy	Mmp23	FALSE	0	0	82.9412	-0.756929	NA	NA	NA	NA	NA	NA	NA	NA	NA
OB1	OB1_to_Ocy	Spint2	FALSE	0	0	82.8611	1.98565	NA	NA	NA	NA	NA	NA	NA	NA	NA
OB1	OB1_to_Ocy	Wscd2	FALSE	0	0	82.5654	1.62913	NA	NA	NA	NA	NA	NA	NA	NA	NA
OB1	OB1_to_Ocy	Akr1b3	FALSE	0	0	82.4921	-0.872596	NA	NA	NA	NA	NA	NA	NA	NA	NA
OB1	OB1_to_Ocy	Cystm1	FALSE	0	0	82.2546	0.906062	NA	NA	NA	NA	NA	NA	NA	NA	NA
OB1	OB1_to_Ocy	Cidea	FALSE	0	0	81.5697	3.38152	NA	NA	NA	NA	NA	NA	NA	NA	NA
OB1	OB1_to_Ocy	Sdc2	FALSE	0	0	80.9968	-0.800392	NA	NA	NA	NA	NA	NA	NA	NA	NA
OB1	OB1_to_Ocy	Magi1	FALSE	0	0	80.3929	1.05118	NA	NA	NA	NA	NA	NA	NA	NA	NA
OB1	OB1_to_Ocy	Col2a1	FALSE	0	0	76.9083	3.05088	NA	NA	NA	NA	NA	NA	NA	NA	NA
OB1	OB1_to_Ocy	Megf6	FALSE	0	0	75.9243	-1.35138	NA	NA	NA	NA	NA	NA	NA	NA	NA
OB1	OB1_to_Ocy	Plekhg1	FALSE	0	0	75.3513	1.36353	NA	NA	NA	NA	NA	NA	NA	NA	NA
OB1	OB1_to_Ocy	Ano6	FALSE	0	0	73.9743	-0.998427	NA	NA	NA	NA	NA	NA	NA	NA	NA
OB1	OB1_to_Ocy	Mgst3	FALSE	0	0	73.521	0.741389	NA	NA	NA	NA	NA	NA	NA	NA	NA
OB1	OB1_to_Ocy	Itga2	FALSE	0	0	72.5725	2.2925	NA	NA	NA	NA	NA	NA	NA	NA	NA
OB1	OB1_to_Ocy	Postn	FALSE	0	0	71.1694	-1.35463	NA	NA	NA	NA	NA	NA	NA	NA	NA
OB1	OB1_to_Ocy	S100a1	FALSE	0	0	70.9677	0.765613	NA	NA	NA	NA	NA	NA	NA	NA	NA
OB1	OB1_to_Ocy	Bmp8a	FALSE	0	0	70.2087	0.82889	NA	NA	NA	NA	NA	NA	NA	NA	NA
OB1	OB1_to_Ocy	1700025G04Rik	FALSE	1.11e-16	3.32e-14	70.0228	1.00124	NA	NA	NA	NA	NA	NA	NA	NA	NA
OB1	OB1_to_Ocy	Pdzd2	FALSE	1.11e-16	3.32e-14	69.8783	-1.76163	NA	NA	NA	NA	NA	NA	NA	NA	NA
OB1	OB1_to_Ocy	Cthrc1	FALSE	1.11e-16	3.32e-14	68.8107	-0.911255	NA	NA	NA	NA	NA	NA	NA	NA	NA
OB1	OB1_to_Ocy	Zeb2	FALSE	1.11e-16	3.32e-14	68.7132	-0.850162	NA	NA	NA	NA	NA	NA	NA	NA	NA
OB1	OB1_to_Ocy	8430408G22Rik	FALSE	1.11e-16	3.32e-14	68.3237	2.40639	NA	NA	NA	NA	NA	NA	NA	NA	NA
OB1	OB1_to_Ocy	Aqp1	FALSE	4.44e-16	1.31e-13	66.0453	-1.1953	NA	NA	NA	NA	NA	NA	NA	NA	NA
OB1	OB1_to_Ocy	Col8a1	FALSE	5.55e-16	1.62e-13	65.5995	-1.51531	NA	NA	NA	NA	NA	NA	NA	NA	NA
OB1	OB1_to_Ocy	Ydjc	FALSE	6.66e-16	1.91e-13	65.3968	-1.38196	NA	NA	NA	NA	NA	NA	NA	NA	NA
OB1	OB1_to_Ocy	Gas1	FALSE	7.77e-16	2.2e-13	64.9757	-1.31931	NA	NA	NA	NA	NA	NA	NA	NA	NA
OB1	OB1_to_Ocy	Scn1b	FALSE	1.33e-15	3.68e-13	63.8727	0.913069	NA	NA	NA	NA	NA	NA	NA	NA	NA
OB1	OB1_to_Ocy	Acta2	FALSE	1.33e-15	3.68e-13	63.7868	-1.33249	NA	NA	NA	NA	NA	NA	NA	NA	NA
OB1	OB1_to_Ocy	Fkbp11	FALSE	1.89e-15	5.15e-13	63.189	-0.703923	NA	NA	NA	NA	NA	NA	NA	NA	NA
OB1	OB1_to_Ocy	Bcat1	FALSE	2.55e-15	6.88e-13	62.5955	-0.909551	NA	NA	NA	NA	NA	NA	NA	NA	NA
OB1	OB1_to_Ocy	Creb3l3	FALSE	2.78e-15	7.39e-13	62.4393	-1.84505	NA	NA	NA	NA	NA	NA	NA	NA	NA
OB1	OB1_to_Ocy	Mgll	FALSE	2.89e-15	7.59e-13	62.3549	1.08535	NA	NA	NA	NA	NA	NA	NA	NA	NA
OB1	OB1_to_Ocy	Cpxm2	FALSE	4.88e-15	1.27e-12	61.2887	2.99186	NA	NA	NA	NA	NA	NA	NA	NA	NA
OB1	OB1_to_Ocy	Anxa4	FALSE	5.22e-15	1.34e-12	61.1781	0.759507	NA	NA	NA	NA	NA	NA	NA	NA	NA
OB1	OB1_to_Ocy	Col3a1	FALSE	6.11e-15	1.55e-12	60.8778	-1.09135	NA	NA	NA	NA	NA	NA	NA	NA	NA
OB1	OB1_to_Ocy	Elmo1	FALSE	8.22e-15	2.06e-12	60.2936	-0.993537	NA	NA	NA	NA	NA	NA	NA	NA	NA
OB1	OB1_to_Ocy	Gja1	FALSE	1.3e-14	3.22e-12	59.3789	0.678145	NA	NA	NA	NA	NA	NA	NA	NA	NA
OB1	OB1_to_Ocy	Ackr4	FALSE	2.56e-14	6.29e-12	58.0448	-1.75542	NA	NA	NA	NA	NA	NA	NA	NA	NA
OB1	OB1_to_Ocy	Tnnc1	FALSE	2.9e-14	7.03e-12	57.8004	1.95067	NA	NA	NA	NA	NA	NA	NA	NA	NA
OB1	OB1_to_Ocy	Pcolce2	FALSE	3.08e-14	7.38e-12	57.6889	0.984348	NA	NA	NA	NA	NA	NA	NA	NA	NA
OB1	OB1_to_Ocy	Smpd3	FALSE	3.77e-14	8.96e-12	57.2806	-0.798277	NA	NA	NA	NA	NA	NA	NA	NA	NA
OB1	OB1_to_Ocy	Slc26a7	FALSE	3.84e-14	9.02e-12	57.2509	-1.73569	NA	NA	NA	NA	NA	NA	NA	NA	NA
OB1	OB1_to_Ocy	Lman1l	FALSE	4.14e-14	9.62e-12	57.1023	1.80096	NA	NA	NA	NA	NA	NA	NA	NA	NA
OB1	OB1_to_Ocy	Prag1	FALSE	7.05e-14	1.62e-11	56.0532	1.32207	NA	NA	NA	NA	NA	NA	NA	NA	NA
OB1	OB1_to_Ocy	Spns2	FALSE	9.02e-14	2.05e-11	55.5715	0.822505	NA	NA	NA	NA	NA	NA	NA	NA	NA
OB1	OB1_to_Ocy	Tmem59	FALSE	9.54e-14	2.15e-11	55.4604	-0.585571	NA	NA	NA	NA	NA	NA	NA	NA	NA
OB1	OB1_to_Ocy	Gm14005	FALSE	9.85e-14	2.19e-11	55.398	0.963372	NA	NA	NA	NA	NA	NA	NA	NA	NA
OB1	OB1_to_Ocy	Pgr	FALSE	1.5e-13	3.3e-11	54.5763	2.53996	NA	NA	NA	NA	NA	NA	NA	NA	NA
OB1	OB1_to_Ocy	Chn1	FALSE	1.73e-13	3.78e-11	54.2865	-2.70025	NA	NA	NA	NA	NA	NA	NA	NA	NA
OB1	OB1_to_Ocy	Notum	FALSE	1.95e-13	4.21e-11	54.0585	-1.78261	NA	NA	NA	NA	NA	NA	NA	NA	NA
OB1	OB1_to_Ocy	Wwp2	FALSE	2.13e-13	4.55e-11	53.8844	0.822562	NA	NA	NA	NA	NA	NA	NA	NA	NA
OB1	OB1_to_Ocy	Tgfa	FALSE	2.23e-13	4.72e-11	53.7939	1.368	NA	NA	NA	NA	NA	NA	NA	NA	NA
OB1	OB1_to_Ocy	Pgam2	FALSE	2.44e-13	5.13e-11	53.6099	1.63889	NA	NA	NA	NA	NA	NA	NA	NA	NA
OB1	OB1_to_Ocy	Pnrc1	FALSE	4.55e-13	9.39e-11	52.3899	0.645386	NA	NA	NA	NA	NA	NA	NA	NA	NA
OB1	OB1_to_Ocy	Srm	FALSE	4.56e-13	9.39e-11	52.3857	-0.752495	NA	NA	NA	NA	NA	NA	NA	NA	NA
OB1	OB1_to_Ocy	Scara3	FALSE	4.82e-13	9.83e-11	52.277	-1.45301	NA	NA	NA	NA	NA	NA	NA	NA	NA
OB1	OB1_to_Ocy	Gm15867	FALSE	7.3e-13	1.48e-10	51.461	1.69192	NA	NA	NA	NA	NA	NA	NA	NA	NA
OB1	OB1_to_Ocy	Prss35	FALSE	1.06e-12	2.12e-10	50.7282	-0.872858	NA	NA	NA	NA	NA	NA	NA	NA	NA
OB1	OB1_to_Ocy	Rnase4	FALSE	1.12e-12	2.23e-10	50.616	-0.885882	NA	NA	NA	NA	NA	NA	NA	NA	NA
OB1	OB1_to_Ocy	Ifitm3	FALSE	1.26e-12	2.48e-10	50.3906	-0.71991	NA	NA	NA	NA	NA	NA	NA	NA	NA
OB1	OB1_to_Ocy	2700038G22Rik	FALSE	2.2e-12	4.29e-10	49.298	-1.30503	NA	NA	NA	NA	NA	NA	NA	NA	NA
OB1	OB1_to_Ocy	Scn1a	FALSE	2.34e-12	4.52e-10	49.1762	1.76975	NA	NA	NA	NA	NA	NA	NA	NA	NA
OB1	OB1_to_Ocy	2200002D01Rik	FALSE	2.62e-12	5.02e-10	48.9513	1.35795	NA	NA	NA	NA	NA	NA	NA	NA	NA
OB1	OB1_to_Ocy	Cnn2	FALSE	2.65e-12	5.04e-10	48.9289	-0.73013	NA	NA	NA	NA	NA	NA	NA	NA	NA
OB1	OB1_to_Ocy	Itpkb	FALSE	2.89e-12	5.44e-10	48.7622	0.901741	NA	NA	NA	NA	NA	NA	NA	NA	NA
OB1	OB1_to_Ocy	Irx5	FALSE	3.35e-12	6.26e-10	48.4703	0.708734	NA	NA	NA	NA	NA	NA	NA	NA	NA
OB1	OB1_to_Ocy	AU021092	FALSE	3.98e-12	7.37e-10	48.1329	1.29229	NA	NA	NA	NA	NA	NA	NA	NA	NA
OB1	OB1_to_Ocy	Epb41l3	FALSE	4.91e-12	9e-10	47.7236	0.982892	NA	NA	NA	NA	NA	NA	NA	NA	NA
OB1	OB1_to_Ocy	Cox8b	FALSE	7.01e-12	1.27e-09	47.0239	4.28715	NA	NA	NA	NA	NA	NA	NA	NA	NA
OB1	OB1_to_Ocy	Adamts4	FALSE	7.04e-12	1.27e-09	47.0169	-1.15804	NA	NA	NA	NA	NA	NA	NA	NA	NA
OB1	OB1_to_Ocy	Srl	FALSE	9.71e-12	1.74e-09	46.3854	1.51819	NA	NA	NA	NA	NA	NA	NA	NA	NA
OB1	OB1_to_Ocy	Ogn	FALSE	1.15e-11	2.05e-09	46.0489	-1.01156	NA	NA	NA	NA	NA	NA	NA	NA	NA
OB1	OB1_to_Ocy	Jup	FALSE	1.66e-11	2.92e-09	45.3372	0.899445	NA	NA	NA	NA	NA	NA	NA	NA	NA
OB1	OB1_to_Ocy	Fkbp10	FALSE	1.7e-11	2.97e-09	45.2885	-0.588823	NA	NA	NA	NA	NA	NA	NA	NA	NA
OB1	OB1_to_Ocy	Pgf	FALSE	1.91e-11	3.31e-09	45.0597	-2.17922	NA	NA	NA	NA	NA	NA	NA	NA	NA
OB1	OB1_to_Ocy	Igfbp4	FALSE	2.81e-11	4.83e-09	44.3035	-0.887528	NA	NA	NA	NA	NA	NA	NA	NA	NA
OB1	OB1_to_Ocy	Fbxo32	FALSE	3.13e-11	5.34e-09	44.092	0.96865	NA	NA	NA	NA	NA	NA	NA	NA	NA
OB1	OB1_to_Ocy	Fgf1	FALSE	3.61e-11	6.1e-09	43.8171	1.16626	NA	NA	NA	NA	NA	NA	NA	NA	NA
OB1	OB1_to_Ocy	Afap1l2	FALSE	3.67e-11	6.15e-09	43.7849	1.08401	NA	NA	NA	NA	NA	NA	NA	NA	NA
OB1	OB1_to_Ocy	Fmnl2	FALSE	4.37e-11	7.28e-09	43.442	0.920716	NA	NA	NA	NA	NA	NA	NA	NA	NA
OB1	OB1_to_Ocy	Fdps	FALSE	4.51e-11	7.46e-09	43.3787	-0.905209	NA	NA	NA	NA	NA	NA	NA	NA	NA
OB1	OB1_to_Ocy	Smpdl3b	FALSE	5.45e-11	8.95e-09	43.0079	-1.20961	NA	NA	NA	NA	NA	NA	NA	NA	NA
OB1	OB1_to_Ocy	Stap2	FALSE	1.05e-10	1.71e-08	41.7241	1.50856	NA	NA	NA	NA	NA	NA	NA	NA	NA
OB1	OB1_to_Ocy	Gchfr	FALSE	1.14e-10	1.84e-08	41.569	1.04512	NA	NA	NA	NA	NA	NA	NA	NA	NA
OB1	OB1_to_Ocy	Islr	FALSE	1.15e-10	1.85e-08	41.5472	-1.3393	NA	NA	NA	NA	NA	NA	NA	NA	NA
OB1	OB1_to_Ocy	Edn2	FALSE	1.39e-10	2.21e-08	41.1793	2.68886	NA	NA	NA	NA	NA	NA	NA	NA	NA
OB1	OB1_to_Ocy	Scd2	FALSE	1.44e-10	2.27e-08	41.1122	-0.716148	NA	NA	NA	NA	NA	NA	NA	NA	NA
OB1	OB1_to_Ocy	Endod1	FALSE	2.5e-10	3.93e-08	40.0286	0.982285	NA	NA	NA	NA	NA	NA	NA	NA	NA
OB1	OB1_to_Ocy	Mfap2	FALSE	2.65e-10	4.14e-08	39.9144	-1.03054	NA	NA	NA	NA	NA	NA	NA	NA	NA
OB1	OB1_to_Ocy	Klf3	FALSE	2.7e-10	4.18e-08	39.8801	0.693169	NA	NA	NA	NA	NA	NA	NA	NA	NA
OB1	OB1_to_Ocy	Kcnh1	FALSE	3.38e-10	5.2e-08	39.4408	-2.08538	NA	NA	NA	NA	NA	NA	NA	NA	NA
OB1	OB1_to_Ocy	Armcx2	FALSE	3.73e-10	5.7e-08	39.2478	-0.988157	NA	NA	NA	NA	NA	NA	NA	NA	NA
OB1	OB1_to_Ocy	Gpr153	FALSE	3.82e-10	5.79e-08	39.2019	-0.961776	NA	NA	NA	NA	NA	NA	NA	NA	NA
OB1	OB1_to_Ocy	Carmil1	FALSE	5.32e-10	8.01e-08	38.5554	0.802236	NA	NA	NA	NA	NA	NA	NA	NA	NA
OB1	OB1_to_Ocy	Tpm2	FALSE	5.53e-10	8.27e-08	38.4803	-0.837071	NA	NA	NA	NA	NA	NA	NA	NA	NA
OB1	OB1_to_Ocy	Plekhh2	FALSE	5.65e-10	8.4e-08	38.4375	0.814021	NA	NA	NA	NA	NA	NA	NA	NA	NA
OB1	OB1_to_Ocy	Ccnd2	FALSE	1.05e-09	1.55e-07	37.2335	-0.695583	NA	NA	NA	NA	NA	NA	NA	NA	NA
OB1	OB1_to_Ocy	Mamdc2	FALSE	1.33e-09	1.94e-07	36.7742	-1.19994	NA	NA	NA	NA	NA	NA	NA	NA	NA
OB1	OB1_to_Ocy	Sertad4	FALSE	1.47e-09	2.13e-07	36.5791	1.34524	NA	NA	NA	NA	NA	NA	NA	NA	NA
OB1	OB1_to_Ocy	Frmd4a	FALSE	1.67e-09	2.42e-07	36.3241	-0.905885	NA	NA	NA	NA	NA	NA	NA	NA	NA
OB1	OB1_to_Ocy	BC055402	FALSE	2.09e-09	3.01e-07	35.8843	1.97124	NA	NA	NA	NA	NA	NA	NA	NA	NA
OB1	OB1_to_Ocy	Mef2a	FALSE	2.13e-09	3.03e-07	35.8539	0.590336	NA	NA	NA	NA	NA	NA	NA	NA	NA
OB1	OB1_to_Ocy	Ssr2	FALSE	2.38e-09	3.38e-07	35.6325	-0.583006	NA	NA	NA	NA	NA	NA	NA	NA	NA
OB1	OB1_to_Ocy	Mbnl1	FALSE	2.42e-09	3.4e-07	35.6046	0.581325	NA	NA	NA	NA	NA	NA	NA	NA	NA
OB1	OB1_to_Ocy	Gucy1a1	FALSE	2.51e-09	3.51e-07	35.534	-0.799005	NA	NA	NA	NA	NA	NA	NA	NA	NA
OB1	OB1_to_Ocy	Agt	FALSE	2.62e-09	3.64e-07	35.4483	0.815472	NA	NA	NA	NA	NA	NA	NA	NA	NA
OB1	OB1_to_Ocy	Ldlrad4	FALSE	2.66e-09	3.68e-07	35.4146	1.00955	NA	NA	NA	NA	NA	NA	NA	NA	NA
OB1	OB1_to_Ocy	Actn3	FALSE	2.71e-09	3.73e-07	35.3785	-1.74435	NA	NA	NA	NA	NA	NA	NA	NA	NA
OB1	OB1_to_Ocy	Coro1c	FALSE	2.75e-09	3.75e-07	35.353	-0.710892	NA	NA	NA	NA	NA	NA	NA	NA	NA
OB1	OB1_to_Ocy	Vstm4	FALSE	2.91e-09	3.95e-07	35.2426	-0.989829	NA	NA	NA	NA	NA	NA	NA	NA	NA
OB1	OB1_to_Ocy	Lum	FALSE	3.06e-09	4.12e-07	35.1466	-1.98765	NA	NA	NA	NA	NA	NA	NA	NA	NA
OB1	OB1_to_Ocy	Vamp5	FALSE	3.56e-09	4.77e-07	34.8515	1.10075	NA	NA	NA	NA	NA	NA	NA	NA	NA
OB1	OB1_to_Ocy	Selenom	FALSE	4.08e-09	5.43e-07	34.5871	-0.579277	NA	NA	NA	NA	NA	NA	NA	NA	NA
OB1	OB1_to_Ocy	Tcf7	FALSE	4.43e-09	5.87e-07	34.4234	-1.15235	NA	NA	NA	NA	NA	NA	NA	NA	NA
OB1	OB1_to_Ocy	Myl9	FALSE	4.91e-09	6.46e-07	34.2249	-0.964111	NA	NA	NA	NA	NA	NA	NA	NA	NA
OB1	OB1_to_Ocy	Cspg4	FALSE	5.07e-09	6.62e-07	34.1633	0.768682	NA	NA	NA	NA	NA	NA	NA	NA	NA
OB1	OB1_to_Ocy	Gdnf	FALSE	5.2e-09	6.76e-07	34.112	1.29812	NA	NA	NA	NA	NA	NA	NA	NA	NA
OB1	OB1_to_Ocy	Ssr1	FALSE	5.3e-09	6.84e-07	34.0777	-0.548395	NA	NA	NA	NA	NA	NA	NA	NA	NA
OB1	OB1_to_Ocy	Homer2	FALSE	5.9e-09	7.57e-07	33.8683	0.85178	NA	NA	NA	NA	NA	NA	NA	NA	NA
OB1	OB1_to_Ocy	P4ha1	FALSE	6.22e-09	7.94e-07	33.764	-0.640937	NA	NA	NA	NA	NA	NA	NA	NA	NA
OB1	OB1_to_Ocy	Atf3	FALSE	9.96e-09	1.26e-06	32.8492	0.726981	NA	NA	NA	NA	NA	NA	NA	NA	NA
[truncated: 1,643 more rows]

## Sheet: Supplementary File 2c
cell_type	cell_type_boundary	Gene	DO_eQTL_eGene	Pvalue_trajectory2	Pvalue_adj_trajectory2	waldStat_trajectory2	logFC_trajectory2	chr	pos	lod	ci_lo	ci_hi	Strand	Start	End	dist_start
OBP	OBP_to_OB2	2310043M15Rik	TRUE	0.000107758	0.00230408	14.9957	2.04103	16	93.0741	13.9403	92.9368	93.9525	-	93792136	93794901	718039
OBP	OBP_to_OB2	Dcaf4	TRUE	1.47e-14	1.38e-12	59.1464	1.10836	12	84.1055	10.1631	83.1273	84.3726	+	83520466	83541920	585060
OBP	OBP_to_OB2	Dpep1	TRUE	2.44e-10	1.43e-08	40.075	-0.965251	8	123.834	10.3352	123.125	124.348	+	123186242	123201812	647885
OBP	OBP_to_OB2	H2-D1	TRUE	0.000883427	0.0150203	11.0572	0.528993	17	35.7214	9.68186	35.0926	42.961	+	35262730	35267499	458681
OBP	OBP_to_OB2	H2-Q6	TRUE	0.00248181	0.037263	9.15395	0.64302	17	35.5924	11.8452	35.0926	35.8597	+	35424850	35430055	167536
OBP	OBP_to_OB2	H2-T22	TRUE	0.00217504	0.0332517	9.39562	-0.719396	17	35.9366	10.5817	35.6066	37.1708	-	36037128	36042747	100554
OBP	OBP_to_OB2	Hapln4	TRUE	5.38e-07	1.83e-05	25.1216	1.45639	8	70.8289	18.6701	68.1909	71.4994	+	70083457	70090862	745427
OBP	OBP_to_OB2	Htr1b	TRUE	0.00131852	0.0212904	10.3164	-1.39129	9	82.1757	12.3409	80.7912	82.6397	-	81628291	81633828	547377
OBP	OBP_to_OB2	Irak1bp1	TRUE	4.26e-05	0.000994805	16.7516	-0.748209	9	82.5516	11.7114	79.4339	83.2499	+	82829540	82847687	277893
OBP	OBP_to_OB2	Lgals9	TRUE	1.17e-10	7.24e-09	41.5199	-1.19612	11	78.6207	11.0077	78.48	79.03	-	78962974	78984946	342227
OBP	OBP_to_OB2	Nrbp2	TRUE	0.000160698	0.00331587	14.2425	0.827451	15	76.0853	10.8595	74.4434	76.1992	-	76085518	76091627	169
OBP	OBP_to_OB2	Pigt	TRUE	0.00193245	0.0300265	9.61262	0.55599	2	164.082	10.2697	163.774	165.28	+	164497520	164508301	415881
OBP	OBP_to_OB2	Pkm	TRUE	1.47e-09	7.45e-08	36.5759	0.660278	9	59.7412	10.1231	59.1014	60.0359	+	59656368	59679375	84852
OBP	OBP_to_OB2	Prss50	TRUE	2.13e-08	9.12e-07	31.3765	2.16177	9	110.822	10.4414	110.529	113.102	+	110857967	110864629	36287
OBP	OBP_to_OB2	Psrc1	TRUE	2.35e-06	7.17e-05	22.2843	-1.15792	3	108.719	17.2518	108.273	108.76	+	108383839	108388231	335526
OBP	OBP_to_OB2	S100a1	TRUE	0.000843817	0.0144255	11.1423	0.618837	3	90.4412	10.1225	89.7624	92.7119	-	90511034	90514392	69799
OBP	OBP_to_OB2	Sec61b	TRUE	3.33e-09	1.6e-07	34.9818	0.636089	4	46.5446	10.5298	45.4759	48.0692	+	47474658	47483242	930106
OBP	OBP_to_OB2	Tmem56	TRUE	0.00087799	0.0149512	11.0687	1.76731	3	121.046	10.1419	120.509	121.192	-	121201761	121283098	155710
OB2	OB2_to_end	1700025G04Rik	FALSE	4.35e-07	0.000282815	25.5307	2.93308	NA	NA	NA	NA	NA	NA	NA	NA	NA
OB2	OB2_to_end	8430408G22Rik	FALSE	0.000315861	0.0433684	12.9739	4.8239	NA	NA	NA	NA	NA	NA	NA	NA	NA
OB2	OB2_to_end	9530026P05Rik	FALSE	4.79e-05	0.0106575	16.5295	2.67759	NA	NA	NA	NA	NA	NA	NA	NA	NA
OB2	OB2_to_end	A430106G13Rik	FALSE	3.03e-05	0.00763051	17.4006	2.86928	NA	NA	NA	NA	NA	NA	NA	NA	NA
OB2	OB2_to_end	A930033H14Rik	FALSE	2.21e-06	0.00100523	22.4031	1.15195	NA	NA	NA	NA	NA	NA	NA	NA	NA
OB2	OB2_to_end	Ackr3	FALSE	1.13e-06	0.000572307	23.6976	2.79947	NA	NA	NA	NA	NA	NA	NA	NA	NA
OB2	OB2_to_end	Acsl3	FALSE	6.96e-05	0.0140643	15.8223	-2.17661	NA	NA	NA	NA	NA	NA	NA	NA	NA
OB2	OB2_to_end	Adarb1	FALSE	0.000307966	0.0426082	13.0213	-3.13433	NA	NA	NA	NA	NA	NA	NA	NA	NA
OB2	OB2_to_end	Adgra3	FALSE	0.000113824	0.0202024	14.8923	2.46746	NA	NA	NA	NA	NA	NA	NA	NA	NA
OB2	OB2_to_end	Ano6	FALSE	5.07e-08	5.27e-05	29.689	-4.32039	NA	NA	NA	NA	NA	NA	NA	NA	NA
OB2	OB2_to_end	Anxa11	FALSE	3.12e-06	0.00121525	21.743	1.97511	NA	NA	NA	NA	NA	NA	NA	NA	NA
OB2	OB2_to_end	Anxa4	FALSE	6.72e-08	6.11e-05	29.1436	2.52591	NA	NA	NA	NA	NA	NA	NA	NA	NA
OB2	OB2_to_end	Anxa7	FALSE	1.01e-05	0.00311686	19.4855	2.06179	NA	NA	NA	NA	NA	NA	NA	NA	NA
OB2	OB2_to_end	Arap2	FALSE	7e-09	1.18e-05	33.535	4.8583	NA	NA	NA	NA	NA	NA	NA	NA	NA
OB2	OB2_to_end	Asrgl1	FALSE	0.000134493	0.0224132	14.5777	2.33402	NA	NA	NA	NA	NA	NA	NA	NA	NA
OB2	OB2_to_end	Atp11b	FALSE	7.23e-10	1.58e-06	37.9582	1.92653	NA	NA	NA	NA	NA	NA	NA	NA	NA
OB2	OB2_to_end	Atp1a3	FALSE	2.99e-07	0.000204128	26.2548	2.59199	NA	NA	NA	NA	NA	NA	NA	NA	NA
OB2	OB2_to_end	Atxn7l2	FALSE	2.92e-06	0.00120159	21.8703	3.01236	NA	NA	NA	NA	NA	NA	NA	NA	NA
OB2	OB2_to_end	Bach1	FALSE	0.000211481	0.0311295	13.7262	-2.70351	NA	NA	NA	NA	NA	NA	NA	NA	NA
OB2	OB2_to_end	Baiap2l1	FALSE	0.000154682	0.0250138	14.3143	3.30635	NA	NA	NA	NA	NA	NA	NA	NA	NA
OB2	OB2_to_end	Batf3	FALSE	8.32e-11	3.81e-07	42.1814	6.68245	NA	NA	NA	NA	NA	NA	NA	NA	NA
OB2	OB2_to_end	Bglap	FALSE	0.000212464	0.0311295	13.7175	-4.52806	NA	NA	NA	NA	NA	NA	NA	NA	NA
OB2	OB2_to_end	C1qtnf4	FALSE	2.18e-05	0.0060087	18.0286	2.25285	NA	NA	NA	NA	NA	NA	NA	NA	NA
OB2	OB2_to_end	Cacna2d1	FALSE	9.76e-07	0.000535382	23.9748	1.99145	NA	NA	NA	NA	NA	NA	NA	NA	NA
OB2	OB2_to_end	Camp	FALSE	0.000173668	0.027081	14.0965	6.26702	NA	NA	NA	NA	NA	NA	NA	NA	NA
OB2	OB2_to_end	Capn6	FALSE	2.5e-06	0.00106831	22.1698	6.92697	NA	NA	NA	NA	NA	NA	NA	NA	NA
OB2	OB2_to_end	Cavin4	FALSE	8.61e-05	0.0166253	15.4204	4.1183	NA	NA	NA	NA	NA	NA	NA	NA	NA
OB2	OB2_to_end	Cbr1	FALSE	7.96e-12	5.79e-08	46.7757	3.25765	NA	NA	NA	NA	NA	NA	NA	NA	NA
OB2	OB2_to_end	Ccnl1	FALSE	0.000182839	0.0277192	13.9997	-1.31706	NA	NA	NA	NA	NA	NA	NA	NA	NA
OB2	OB2_to_end	Cd109	FALSE	0.000111637	0.0201418	14.9289	2.06844	NA	NA	NA	NA	NA	NA	NA	NA	NA
OB2	OB2_to_end	Cdc42ep2	FALSE	3.98e-08	4.83e-05	30.1593	4.00555	NA	NA	NA	NA	NA	NA	NA	NA	NA
OB2	OB2_to_end	Cdk19	FALSE	9.4e-05	0.0178413	15.2539	1.51739	NA	NA	NA	NA	NA	NA	NA	NA	NA
OB2	OB2_to_end	Chd7	FALSE	3.04e-05	0.00763051	17.3921	-3.44668	NA	NA	NA	NA	NA	NA	NA	NA	NA
OB2	OB2_to_end	Colgalt2	FALSE	1.85e-08	2.52e-05	31.6473	4.09141	NA	NA	NA	NA	NA	NA	NA	NA	NA
OB2	OB2_to_end	Cpne5	FALSE	6.39e-10	1.55e-06	38.1987	3.85047	NA	NA	NA	NA	NA	NA	NA	NA	NA
OB2	OB2_to_end	Crybg3	FALSE	5.69e-05	0.0118913	16.2032	-3.3695	NA	NA	NA	NA	NA	NA	NA	NA	NA
OB2	OB2_to_end	D830025C05Rik	FALSE	7.74e-05	0.0153115	15.6214	-5.16099	NA	NA	NA	NA	NA	NA	NA	NA	NA
OB2	OB2_to_end	Dbi	FALSE	0.000216736	0.0313349	13.6801	-1.85047	NA	NA	NA	NA	NA	NA	NA	NA	NA
OB2	OB2_to_end	Ddit4l	FALSE	6.4e-10	1.55e-06	38.1957	4.64421	NA	NA	NA	NA	NA	NA	NA	NA	NA
OB2	OB2_to_end	Edn2	FALSE	4.74e-07	0.000295481	25.368	7.63572	NA	NA	NA	NA	NA	NA	NA	NA	NA
OB2	OB2_to_end	Efnb1	FALSE	0.000216079	0.0313349	13.6858	-2.26005	NA	NA	NA	NA	NA	NA	NA	NA	NA
OB2	OB2_to_end	Enah	FALSE	2.52e-05	0.00654895	17.7495	1.94449	NA	NA	NA	NA	NA	NA	NA	NA	NA
OB2	OB2_to_end	Eps8l2	FALSE	5.45e-05	0.0115542	16.2843	2.61427	NA	NA	NA	NA	NA	NA	NA	NA	NA
OB2	OB2_to_end	Fam212a	FALSE	1.74e-05	0.00500103	18.4535	4.07571	NA	NA	NA	NA	NA	NA	NA	NA	NA
OB2	OB2_to_end	Fam98c	FALSE	0.000153291	0.0249738	14.3314	1.53536	NA	NA	NA	NA	NA	NA	NA	NA	NA
OB2	OB2_to_end	Fmnl2	FALSE	5.38e-05	0.0115489	16.3105	2.68671	NA	NA	NA	NA	NA	NA	NA	NA	NA
OB2	OB2_to_end	Fyn	FALSE	0.000107907	0.0197959	14.9931	-2.98431	NA	NA	NA	NA	NA	NA	NA	NA	NA
OB2	OB2_to_end	Fyttd1	FALSE	0.000124725	0.0216101	14.7199	1.39503	NA	NA	NA	NA	NA	NA	NA	NA	NA
OB2	OB2_to_end	Fzd7	FALSE	1.28e-05	0.00372806	19.039	2.77471	NA	NA	NA	NA	NA	NA	NA	NA	NA
OB2	OB2_to_end	Gas1	FALSE	3.25e-05	0.00797236	17.2656	-4.94343	NA	NA	NA	NA	NA	NA	NA	NA	NA
OB2	OB2_to_end	Gfod1	FALSE	3.45e-05	0.00837113	17.1517	2.17426	NA	NA	NA	NA	NA	NA	NA	NA	NA
OB2	OB2_to_end	Gja1	FALSE	3.82e-06	0.00141055	21.3515	1.84509	NA	NA	NA	NA	NA	NA	NA	NA	NA
OB2	OB2_to_end	Gls2	FALSE	5.4e-05	0.0115489	16.3037	3.4916	NA	NA	NA	NA	NA	NA	NA	NA	NA
OB2	OB2_to_end	Gm28723	FALSE	8.72e-11	3.81e-07	42.09	2.92803	NA	NA	NA	NA	NA	NA	NA	NA	NA
OB2	OB2_to_end	Hapln1	FALSE	0.000165109	0.0261195	14.1916	5.8231	NA	NA	NA	NA	NA	NA	NA	NA	NA
OB2	OB2_to_end	Hey2	FALSE	0.000267182	0.0378757	13.2875	3.45854	NA	NA	NA	NA	NA	NA	NA	NA	NA
OB2	OB2_to_end	Homer2	FALSE	8.49e-08	7.13e-05	28.6907	3.32892	NA	NA	NA	NA	NA	NA	NA	NA	NA
OB2	OB2_to_end	Hoxd1	FALSE	8.75e-05	0.0167576	15.3888	2.26396	NA	NA	NA	NA	NA	NA	NA	NA	NA
OB2	OB2_to_end	Hr	FALSE	0.000128238	0.0218287	14.6675	2.45172	NA	NA	NA	NA	NA	NA	NA	NA	NA
OB2	OB2_to_end	Hs3st6	FALSE	4.87e-06	0.00168929	20.8858	3.21172	NA	NA	NA	NA	NA	NA	NA	NA	NA
OB2	OB2_to_end	Insig1	FALSE	9.23e-06	0.00288001	19.6636	-3.04138	NA	NA	NA	NA	NA	NA	NA	NA	NA
OB2	OB2_to_end	Ip6k1	FALSE	5e-05	0.0109141	16.4484	1.26094	NA	NA	NA	NA	NA	NA	NA	NA	NA
OB2	OB2_to_end	Irx6	FALSE	5.88e-05	0.0121006	16.1424	8.46443	NA	NA	NA	NA	NA	NA	NA	NA	NA
OB2	OB2_to_end	Jam2	FALSE	7.79e-05	0.0153115	15.6098	2.68293	NA	NA	NA	NA	NA	NA	NA	NA	NA
OB2	OB2_to_end	Jmjd6	FALSE	5.4e-06	0.00184368	20.6881	1.61858	NA	NA	NA	NA	NA	NA	NA	NA	NA
OB2	OB2_to_end	Junb	FALSE	0.000303111	0.042418	13.0511	-1.2956	NA	NA	NA	NA	NA	NA	NA	NA	NA
OB2	OB2_to_end	Kctd15	FALSE	0.000207262	0.0307805	13.7641	1.5967	NA	NA	NA	NA	NA	NA	NA	NA	NA
OB2	OB2_to_end	Klhl13	FALSE	2.34e-05	0.00625125	17.8933	2.32467	NA	NA	NA	NA	NA	NA	NA	NA	NA
OB2	OB2_to_end	Layn	FALSE	4.88e-08	5.27e-05	29.7621	5.63508	NA	NA	NA	NA	NA	NA	NA	NA	NA
OB2	OB2_to_end	Lcn2	FALSE	1.22e-05	0.00364869	19.1316	6.05573	NA	NA	NA	NA	NA	NA	NA	NA	NA
OB2	OB2_to_end	Ldlrad4	FALSE	1.51e-06	0.000715538	23.1381	3.29781	NA	NA	NA	NA	NA	NA	NA	NA	NA
OB2	OB2_to_end	Loxl4	FALSE	0.00010721	0.0197959	15.0053	2.46806	NA	NA	NA	NA	NA	NA	NA	NA	NA
OB2	OB2_to_end	Lsm11	FALSE	0.000133363	0.0223958	14.5936	2.00834	NA	NA	NA	NA	NA	NA	NA	NA	NA
OB2	OB2_to_end	Luzp1	FALSE	3.95e-05	0.00917458	16.8951	-1.6102	NA	NA	NA	NA	NA	NA	NA	NA	NA
OB2	OB2_to_end	Lxn	FALSE	2.26e-06	0.001009	22.3563	2.36108	NA	NA	NA	NA	NA	NA	NA	NA	NA
OB2	OB2_to_end	Map3k1	FALSE	4.41e-08	5.07e-05	29.9592	2.09755	NA	NA	NA	NA	NA	NA	NA	NA	NA
OB2	OB2_to_end	Mapk1	FALSE	3.89e-05	0.00913181	16.9242	1.48421	NA	NA	NA	NA	NA	NA	NA	NA	NA
OB2	OB2_to_end	Mcur1	FALSE	5.35e-07	0.000324451	25.1332	1.56075	NA	NA	NA	NA	NA	NA	NA	NA	NA
OB2	OB2_to_end	Mical2	FALSE	0.000175382	0.0271544	14.078	-3.16361	NA	NA	NA	NA	NA	NA	NA	NA	NA
OB2	OB2_to_end	mt-Co3	FALSE	0.000113105	0.0202024	14.9043	-1.31509	NA	NA	NA	NA	NA	NA	NA	NA	NA
OB2	OB2_to_end	mt-Cytb	FALSE	5.9e-06	0.00193928	20.5199	-1.48839	NA	NA	NA	NA	NA	NA	NA	NA	NA
OB2	OB2_to_end	mt-Nd1	FALSE	5.95e-06	0.00193928	20.5037	-1.94706	NA	NA	NA	NA	NA	NA	NA	NA	NA
OB2	OB2_to_end	mt-Nd3	FALSE	1.82e-06	0.000846018	22.7748	-2.44459	NA	NA	NA	NA	NA	NA	NA	NA	NA
OB2	OB2_to_end	mt-Nd4l	FALSE	1.16e-05	0.00351839	19.2274	-1.99912	NA	NA	NA	NA	NA	NA	NA	NA	NA
OB2	OB2_to_end	Mtus1	FALSE	0.00016993	0.0266887	14.1374	2.67946	NA	NA	NA	NA	NA	NA	NA	NA	NA
OB2	OB2_to_end	Myo10	FALSE	7.13e-05	0.0142735	15.7769	-1.79274	NA	NA	NA	NA	NA	NA	NA	NA	NA
OB2	OB2_to_end	Nav1	FALSE	2.45e-05	0.00645467	17.7999	-2.80687	NA	NA	NA	NA	NA	NA	NA	NA	NA
OB2	OB2_to_end	Nes	FALSE	7.04e-07	0.000404473	24.604	4.24971	NA	NA	NA	NA	NA	NA	NA	NA	NA
OB2	OB2_to_end	Ngp	FALSE	7.96e-08	6.95e-05	28.8168	7.97992	NA	NA	NA	NA	NA	NA	NA	NA	NA
OB2	OB2_to_end	Nr4a1	FALSE	1.2e-06	0.000594749	23.5793	-1.76471	NA	NA	NA	NA	NA	NA	NA	NA	NA
OB2	OB2_to_end	Nrp2	FALSE	5.72e-05	0.0118913	16.1934	-2.76713	NA	NA	NA	NA	NA	NA	NA	NA	NA
OB2	OB2_to_end	Nyap1	FALSE	1.45e-06	0.000703368	23.2134	6.02595	NA	NA	NA	NA	NA	NA	NA	NA	NA
OB2	OB2_to_end	Odc1	FALSE	3.88e-06	0.00141055	21.3249	-1.7354	NA	NA	NA	NA	NA	NA	NA	NA	NA
OB2	OB2_to_end	Pcp4	FALSE	2.35e-05	0.00625125	17.8839	4.81362	NA	NA	NA	NA	NA	NA	NA	NA	NA
OB2	OB2_to_end	Peli1	FALSE	1.26e-05	0.00372806	19.0632	1.73185	NA	NA	NA	NA	NA	NA	NA	NA	NA
OB2	OB2_to_end	Pgp	FALSE	5.84e-08	5.59e-05	29.4169	1.51045	NA	NA	NA	NA	NA	NA	NA	NA	NA
OB2	OB2_to_end	Pim2	FALSE	1.08e-06	0.000572307	23.7801	1.67457	NA	NA	NA	NA	NA	NA	NA	NA	NA
OB2	OB2_to_end	Plekhg1	FALSE	0.000128987	0.0218287	14.6565	2.76632	NA	NA	NA	NA	NA	NA	NA	NA	NA
OB2	OB2_to_end	Prr15	FALSE	4.24e-09	7.71e-06	34.5117	3.83887	NA	NA	NA	NA	NA	NA	NA	NA	NA
OB2	OB2_to_end	Prrx1	FALSE	1.8e-05	0.00509137	18.3945	-3.03714	NA	NA	NA	NA	NA	NA	NA	NA	NA
OB2	OB2_to_end	Psme4	FALSE	8.36e-09	1.3e-05	33.1902	2.09935	NA	NA	NA	NA	NA	NA	NA	NA	NA
OB2	OB2_to_end	Ptgfrn	FALSE	4.62e-06	0.00162777	20.9875	1.51137	NA	NA	NA	NA	NA	NA	NA	NA	NA
OB2	OB2_to_end	Ptp4a1	FALSE	0.000120041	0.0209649	14.792	-1.41971	NA	NA	NA	NA	NA	NA	NA	NA	NA
OB2	OB2_to_end	Ptprd	FALSE	6.82e-05	0.013911	15.8607	-2.86054	NA	NA	NA	NA	NA	NA	NA	NA	NA
OB2	OB2_to_end	Ptprm	FALSE	0.000337815	0.0460927	12.8481	1.23068	NA	NA	NA	NA	NA	NA	NA	NA	NA
OB2	OB2_to_end	Rab27b	FALSE	0.00015061	0.0247215	14.3646	2.54954	NA	NA	NA	NA	NA	NA	NA	NA	NA
OB2	OB2_to_end	Rab39	FALSE	0.000193412	0.0289204	13.894	5.98697	NA	NA	NA	NA	NA	NA	NA	NA	NA
OB2	OB2_to_end	Rasa3	FALSE	0.000101311	0.0190665	15.1121	-2.73461	NA	NA	NA	NA	NA	NA	NA	NA	NA
OB2	OB2_to_end	Rbbp6	FALSE	0.000144572	0.0239103	14.4416	-1.62653	NA	NA	NA	NA	NA	NA	NA	NA	NA
OB2	OB2_to_end	Rgs11	FALSE	0.000162437	0.0258845	14.2223	2.86638	NA	NA	NA	NA	NA	NA	NA	NA	NA
OB2	OB2_to_end	Rhobtb1	FALSE	1.11e-07	8.96e-05	28.1758	2.14827	NA	NA	NA	NA	NA	NA	NA	NA	NA
OB2	OB2_to_end	Rnf122	FALSE	4.45e-05	0.0100085	16.6704	-4.38868	NA	NA	NA	NA	NA	NA	NA	NA	NA
OB2	OB2_to_end	Rnf208	FALSE	3.08e-06	0.00121525	21.7677	3.99731	NA	NA	NA	NA	NA	NA	NA	NA	NA
OB2	OB2_to_end	Rnf217	FALSE	4.31e-05	0.0098205	16.7313	2.50061	NA	NA	NA	NA	NA	NA	NA	NA	NA
OB2	OB2_to_end	Rubcn	FALSE	9.81e-07	0.000535382	23.9651	1.93068	NA	NA	NA	NA	NA	NA	NA	NA	NA
OB2	OB2_to_end	Rundc1	FALSE	2.32e-06	0.00101409	22.3078	1.65128	NA	NA	NA	NA	NA	NA	NA	NA	NA
OB2	OB2_to_end	Runx3	FALSE	0.000341963	0.0463689	12.8253	1.80046	NA	NA	NA	NA	NA	NA	NA	NA	NA
OB2	OB2_to_end	Rusc2	FALSE	6.5e-07	0.000383789	24.7566	2.16347	NA	NA	NA	NA	NA	NA	NA	NA	NA
OB2	OB2_to_end	S100a8	FALSE	2.06e-07	0.000149843	26.9768	6.9592	NA	NA	NA	NA	NA	NA	NA	NA	NA
OB2	OB2_to_end	S100a9	FALSE	2.67e-07	0.000188158	26.4735	6.48658	NA	NA	NA	NA	NA	NA	NA	NA	NA
OB2	OB2_to_end	Samd11	FALSE	2.2e-05	0.0060087	18.0062	3.13342	NA	NA	NA	NA	NA	NA	NA	NA	NA
OB2	OB2_to_end	Sccpdh	FALSE	0.000107521	0.0197959	14.9998	1.20774	NA	NA	NA	NA	NA	NA	NA	NA	NA
OB2	OB2_to_end	Sema4g	FALSE	0.000116781	0.02056	14.844	1.91695	NA	NA	NA	NA	NA	NA	NA	NA	NA
OB2	OB2_to_end	Sfmbt2	FALSE	5.89e-08	5.59e-05	29.4005	2.54411	NA	NA	NA	NA	NA	NA	NA	NA	NA
OB2	OB2_to_end	Slc25a36	FALSE	3.75e-06	0.00140967	21.391	1.88135	NA	NA	NA	NA	NA	NA	NA	NA	NA
OB2	OB2_to_end	Sncb	FALSE	2.96e-09	5.88e-06	35.2083	5.22479	NA	NA	NA	NA	NA	NA	NA	NA	NA
OB2	OB2_to_end	Sox6	FALSE	3.73e-05	0.00884933	17.0044	3.65937	NA	NA	NA	NA	NA	NA	NA	NA	NA
OB2	OB2_to_end	Sox9	FALSE	2.82e-06	0.00118486	21.9338	2.84398	NA	NA	NA	NA	NA	NA	NA	NA	NA
OB2	OB2_to_end	St6galnac6	FALSE	0.000160339	0.0257379	14.2467	-1.77825	NA	NA	NA	NA	NA	NA	NA	NA	NA
OB2	OB2_to_end	Stard5	FALSE	0.000128289	0.0218287	14.6668	1.95797	NA	NA	NA	NA	NA	NA	NA	NA	NA
OB2	OB2_to_end	Stk17b	FALSE	1.17e-07	9.16e-05	28.0625	-2.43727	NA	NA	NA	NA	NA	NA	NA	NA	NA
OB2	OB2_to_end	Strip2	FALSE	5.56e-06	0.00186631	20.6351	3.855	NA	NA	NA	NA	NA	NA	NA	NA	NA
OB2	OB2_to_end	Sulf1	FALSE	0.000218327	0.0313362	13.6664	4.25861	NA	NA	NA	NA	NA	NA	NA	NA	NA
OB2	OB2_to_end	Sun1	FALSE	2.82e-05	0.00724932	17.5337	1.47727	NA	NA	NA	NA	NA	NA	NA	NA	NA
OB2	OB2_to_end	Swap70	FALSE	0.000181816	0.0277192	14.0103	1.41005	NA	NA	NA	NA	NA	NA	NA	NA	NA
OB2	OB2_to_end	Syn3	FALSE	3.47e-06	0.00132815	21.5386	5.92012	NA	NA	NA	NA	NA	NA	NA	NA	NA
OB2	OB2_to_end	Tbkbp1	FALSE	0.000179815	0.0276446	14.0311	2.53118	NA	NA	NA	NA	NA	NA	NA	NA	NA
OB2	OB2_to_end	Tead4	FALSE	4.4e-07	0.000282815	25.5084	3.6057	NA	NA	NA	NA	NA	NA	NA	NA	NA
OB2	OB2_to_end	Thbs1	FALSE	0.000344783	0.0464627	12.8099	-3.34135	NA	NA	NA	NA	NA	NA	NA	NA	NA
OB2	OB2_to_end	Timp3	FALSE	3.01e-06	0.00121525	21.8075	6.80105	NA	NA	NA	NA	NA	NA	NA	NA	NA
OB2	OB2_to_end	Tinagl1	FALSE	1.48e-07	0.000111746	27.6096	5.21625	NA	NA	NA	NA	NA	NA	NA	NA	NA
OB2	OB2_to_end	Tlcd2	FALSE	4.83e-05	0.0106575	16.5125	-2.67898	NA	NA	NA	NA	NA	NA	NA	NA	NA
OB2	OB2_to_end	Tpbgl	FALSE	0.000108939	0.0198187	14.9751	2.22731	NA	NA	NA	NA	NA	NA	NA	NA	NA
OB2	OB2_to_end	Tpd52	FALSE	2.19e-05	0.0060087	18.0148	2.0652	NA	NA	NA	NA	NA	NA	NA	NA	NA
OB2	OB2_to_end	Tram2	FALSE	8.17e-05	0.0159217	15.5189	1.59043	NA	NA	NA	NA	NA	NA	NA	NA	NA
OB2	OB2_to_end	Trim47	FALSE	1.88e-13	2.05e-09	54.127	5.05811	NA	NA	NA	NA	NA	NA	NA	NA	NA
OB2	OB2_to_end	Tsc22d4	FALSE	1.41e-08	2.05e-05	32.1777	1.91018	NA	NA	NA	NA	NA	NA	NA	NA	NA
OB2	OB2_to_end	Twsg1	FALSE	0.000347037	0.0464796	12.7977	1.89943	NA	NA	NA	NA	NA	NA	NA	NA	NA
OB2	OB2_to_end	Txnrd1	FALSE	7.46e-06	0.00239418	20.0721	-2.57841	NA	NA	NA	NA	NA	NA	NA	NA	NA
OB2	OB2_to_end	Uap1	FALSE	0.000376404	0.0495017	12.6458	-2.23669	NA	NA	NA	NA	NA	NA	NA	NA	NA
OB2	OB2_to_end	Usp3	FALSE	4.13e-10	1.5e-06	39.0523	1.83859	NA	NA	NA	NA	NA	NA	NA	NA	NA
OB2	OB2_to_end	Vamp5	FALSE	5.78e-10	1.55e-06	38.3943	5.25687	NA	NA	NA	NA	NA	NA	NA	NA	NA
OB2	OB2_to_end	Vamp8	FALSE	3.6e-05	0.00863928	17.0708	1.82793	NA	NA	NA	NA	NA	NA	NA	NA	NA
OB2	OB2_to_end	Vapa	FALSE	3.13e-05	0.0077656	17.337	1.22403	NA	NA	NA	NA	NA	NA	NA	NA	NA
OB2	OB2_to_end	Vasn	FALSE	0.000281316	0.039622	13.1909	-1.57679	NA	NA	NA	NA	NA	NA	NA	NA	NA
OB2	OB2_to_end	Vdr	FALSE	0.000188097	0.0283196	13.9464	-3.82715	NA	NA	NA	NA	NA	NA	NA	NA	NA
OB2	OB2_to_end	Vps37b	FALSE	4.08e-06	0.00146127	21.2255	-4.18593	NA	NA	NA	NA	NA	NA	NA	NA	NA
OB2	OB2_to_end	Wnk4	FALSE	0	0	70.8578	5.41923	NA	NA	NA	NA	NA	NA	NA	NA	NA
OB2	OB2_to_end	Wscd2	FALSE	1.11e-06	0.000572307	23.73	3.85298	NA	NA	NA	NA	NA	NA	NA	NA	NA
OB2	OB2_to_end	Wwp2	FALSE	0.000308374	0.0426082	13.0188	2.36017	NA	NA	NA	NA	NA	NA	NA	NA	NA
OB2	OB2_to_end	Xylt1	FALSE	2.62e-08	3.37e-05	30.9691	2.27694	NA	NA	NA	NA	NA	NA	NA	NA	NA
OB2	OB2_to_end	Ywhaq	FALSE	0.000219616	0.0313362	13.6553	1.57125	NA	NA	NA	NA	NA	NA	NA	NA	NA
OB2	OB2_to_end	Zeb2	FALSE	4.32e-05	0.0098205	16.726	-2.44225	NA	NA	NA	NA	NA	NA	NA	NA	NA
OB2	OB2_to_end	Zfp281	FALSE	0.000375417	0.0495017	12.6507	1.57106	NA	NA	NA	NA	NA	NA	NA	NA	NA
OB2	OB2_to_end	Zfp335	FALSE	0.00036781	0.0489613	12.689	1.08967	NA	NA	NA	NA	NA	NA	NA	NA	NA
OB2	OB2_to_end	Zfp36	FALSE	8.77e-06	0.00277435	19.7625	-1.74959	NA	NA	NA	NA	NA	NA	NA	NA	NA
OBP	OBP_to_OB2	1110046J04Rik	FALSE	7.37e-06	0.000201381	20.0946	-1.20068	NA	NA	NA	NA	NA	NA	NA	NA	NA
OBP	OBP_to_OB2	1110051M20Rik	FALSE	0.00282202	0.0418529	8.91911	-0.672743	NA	NA	NA	NA	NA	NA	NA	NA	NA
OBP	OBP_to_OB2	1500009L16Rik	FALSE	0	0	124.175	-1.83855	NA	NA	NA	NA	NA	NA	NA	NA	NA
OBP	OBP_to_OB2	1700003F12Rik	FALSE	9.72e-06	0.000260072	19.5655	0.815151	NA	NA	NA	NA	NA	NA	NA	NA	NA
OBP	OBP_to_OB2	2010300C02Rik	FALSE	0.000176714	0.00360883	14.0638	2.60967	NA	NA	NA	NA	NA	NA	NA	NA	NA
OBP	OBP_to_OB2	2310033P09Rik	FALSE	2.5e-06	7.6e-05	22.163	-1.08968	NA	NA	NA	NA	NA	NA	NA	NA	NA
OBP	OBP_to_OB2	2310039H08Rik	FALSE	2.84e-06	8.52e-05	21.9192	0.697563	NA	NA	NA	NA	NA	NA	NA	NA	NA
OBP	OBP_to_OB2	2310040G24Rik	FALSE	0.00311307	0.0455811	8.73998	1.1807	NA	NA	NA	NA	NA	NA	NA	NA	NA
OBP	OBP_to_OB2	2610300M13Rik	FALSE	2.78e-14	2.54e-12	57.8868	-1.67296	NA	NA	NA	NA	NA	NA	NA	NA	NA
OBP	OBP_to_OB2	2810433D01Rik	FALSE	0.0034187	0.0493493	8.56934	-2.39232	NA	NA	NA	NA	NA	NA	NA	NA	NA
OBP	OBP_to_OB2	2900026A02Rik	FALSE	1.29e-09	6.65e-08	36.8266	-1.04611	NA	NA	NA	NA	NA	NA	NA	NA	NA
OBP	OBP_to_OB2	2900076A07Rik	FALSE	0.000398892	0.00743657	12.5374	0.913198	NA	NA	NA	NA	NA	NA	NA	NA	NA
OBP	OBP_to_OB2	4833412C05Rik	FALSE	1.15e-05	0.000303543	19.247	-1.94959	NA	NA	NA	NA	NA	NA	NA	NA	NA
OBP	OBP_to_OB2	4930402H24Rik	FALSE	0.000779186	0.0134257	11.2902	-0.850002	NA	NA	NA	NA	NA	NA	NA	NA	NA
OBP	OBP_to_OB2	4930503L19Rik	FALSE	0.000761008	0.0131645	11.334	-0.773014	NA	NA	NA	NA	NA	NA	NA	NA	NA
OBP	OBP_to_OB2	4930579G24Rik	FALSE	3.26e-05	0.000782107	17.2619	-1.10643	NA	NA	NA	NA	NA	NA	NA	NA	NA
OBP	OBP_to_OB2	9130008F23Rik	FALSE	3.5e-05	0.000833379	17.1246	-2.06004	NA	NA	NA	NA	NA	NA	NA	NA	NA
OBP	OBP_to_OB2	9930111J21Rik2	FALSE	0.00318521	0.046506	8.69822	-2.29509	NA	NA	NA	NA	NA	NA	NA	NA	NA
OBP	OBP_to_OB2	Abca1	FALSE	0.000148833	0.0030915	14.3869	0.688028	NA	NA	NA	NA	NA	NA	NA	NA	NA
OBP	OBP_to_OB2	Abcb1b	FALSE	5.48e-05	0.0012558	16.2738	-1.29636	NA	NA	NA	NA	NA	NA	NA	NA	NA
OBP	OBP_to_OB2	Abcg2	FALSE	2.22e-16	2.54e-14	67.1119	-1.38552	NA	NA	NA	NA	NA	NA	NA	NA	NA
OBP	OBP_to_OB2	Abi3bp	FALSE	0.00164243	0.02587	9.91157	-1.13095	NA	NA	NA	NA	NA	NA	NA	NA	NA
OBP	OBP_to_OB2	Abracl	FALSE	6.36e-05	0.00143622	15.9918	-0.612531	NA	NA	NA	NA	NA	NA	NA	NA	NA
OBP	OBP_to_OB2	Acaa2	FALSE	4.68e-08	1.94e-06	29.8437	-0.911084	NA	NA	NA	NA	NA	NA	NA	NA	NA
OBP	OBP_to_OB2	Acadl	FALSE	2.91e-06	8.7e-05	21.8747	-0.783144	NA	NA	NA	NA	NA	NA	NA	NA	NA
OBP	OBP_to_OB2	Acan	FALSE	0.000669045	0.0117505	11.5733	-1.95009	NA	NA	NA	NA	NA	NA	NA	NA	NA
OBP	OBP_to_OB2	Ackr3	FALSE	0	0	92.2293	1.25525	NA	NA	NA	NA	NA	NA	NA	NA	NA
OBP	OBP_to_OB2	Ackr4	FALSE	0	0	139.727	-2.11749	NA	NA	NA	NA	NA	NA	NA	NA	NA
OBP	OBP_to_OB2	Acta2	FALSE	0	0	377.66	-3.02636	NA	NA	NA	NA	NA	NA	NA	NA	NA
OBP	OBP_to_OB2	Actb	FALSE	4.76e-10	2.63e-08	38.7728	-0.627297	NA	NA	NA	NA	NA	NA	NA	NA	NA
OBP	OBP_to_OB2	Actg1	FALSE	4.75e-12	3.51e-10	47.7887	-0.724574	NA	NA	NA	NA	NA	NA	NA	NA	NA
OBP	OBP_to_OB2	Actg2	FALSE	0	0	174.196	-3.66055	NA	NA	NA	NA	NA	NA	NA	NA	NA
OBP	OBP_to_OB2	Actn1	FALSE	2.71e-14	2.48e-12	57.9337	-0.821686	NA	NA	NA	NA	NA	NA	NA	NA	NA
OBP	OBP_to_OB2	Actn3	FALSE	1.63e-11	1.13e-09	45.3718	-1.56282	NA	NA	NA	NA	NA	NA	NA	NA	NA
OBP	OBP_to_OB2	Actn4	FALSE	0	0	135.804	-1.04039	NA	NA	NA	NA	NA	NA	NA	NA	NA
OBP	OBP_to_OB2	Actr3	FALSE	8.89e-06	0.000239175	19.7373	-0.58601	NA	NA	NA	NA	NA	NA	NA	NA	NA
OBP	OBP_to_OB2	Ada	FALSE	8.87e-05	0.00194973	15.3635	-1.20673	NA	NA	NA	NA	NA	NA	NA	NA	NA
OBP	OBP_to_OB2	Adamts1	FALSE	1.45e-09	7.39e-08	36.5969	-0.999059	NA	NA	NA	NA	NA	NA	NA	NA	NA
OBP	OBP_to_OB2	Adamts14	FALSE	3.74e-05	0.000885834	17.0004	1.3931	NA	NA	NA	NA	NA	NA	NA	NA	NA
OBP	OBP_to_OB2	Adamts4	FALSE	0.000944327	0.015944	10.9337	-0.81339	NA	NA	NA	NA	NA	NA	NA	NA	NA
OBP	OBP_to_OB2	Adcy2	FALSE	4.89e-05	0.00113411	16.4889	-1.11014	NA	NA	NA	NA	NA	NA	NA	NA	NA
OBP	OBP_to_OB2	Adgra2	FALSE	2.16e-11	1.47e-09	44.8169	-1.79933	NA	NA	NA	NA	NA	NA	NA	NA	NA
OBP	OBP_to_OB2	Adgrd1	FALSE	1.74e-09	8.72e-08	36.2482	0.95811	NA	NA	NA	NA	NA	NA	NA	NA	NA
OBP	OBP_to_OB2	Adgrf5	FALSE	5.42e-11	3.48e-09	43.0189	-1.00148	NA	NA	NA	NA	NA	NA	NA	NA	NA
OBP	OBP_to_OB2	Adgrg2	FALSE	6.16e-05	0.00139598	16.0515	-1.76954	NA	NA	NA	NA	NA	NA	NA	NA	NA
OBP	OBP_to_OB2	Adgrl2	FALSE	3.22e-05	0.000774275	17.2831	-0.861006	NA	NA	NA	NA	NA	NA	NA	NA	NA
OBP	OBP_to_OB2	Adipoq	FALSE	2.17e-11	1.47e-09	44.8128	-1.72256	NA	NA	NA	NA	NA	NA	NA	NA	NA
OBP	OBP_to_OB2	Adm	FALSE	0.00297889	0.0438222	8.82035	-0.772551	NA	NA	NA	NA	NA	NA	NA	NA	NA
OBP	OBP_to_OB2	Adm2	FALSE	4.97e-07	1.7e-05	25.2748	1.01452	NA	NA	NA	NA	NA	NA	NA	NA	NA
OBP	OBP_to_OB2	Aebp1	FALSE	0	0	124.85	-1.23404	NA	NA	NA	NA	NA	NA	NA	NA	NA
OBP	OBP_to_OB2	Aen	FALSE	0.000447928	0.00824513	12.3208	-0.685525	NA	NA	NA	NA	NA	NA	NA	NA	NA
OBP	OBP_to_OB2	Agbl3	FALSE	1.34e-09	6.91e-08	36.7479	-1.10345	NA	NA	NA	NA	NA	NA	NA	NA	NA
OBP	OBP_to_OB2	Agpat3	FALSE	4.09e-07	1.41e-05	25.6531	0.779581	NA	NA	NA	NA	NA	NA	NA	NA	NA
OBP	OBP_to_OB2	Agrn	FALSE	0.000169133	0.00347024	14.1463	0.770899	NA	NA	NA	NA	NA	NA	NA	NA	NA
OBP	OBP_to_OB2	Agt	FALSE	1.34e-06	4.27e-05	23.3673	0.949327	NA	NA	NA	NA	NA	NA	NA	NA	NA
OBP	OBP_to_OB2	Ahcyl1	FALSE	0.000548739	0.00990861	11.9423	-0.5884	NA	NA	NA	NA	NA	NA	NA	NA	NA
OBP	OBP_to_OB2	Ahnak	FALSE	0.00105519	0.0175311	10.7281	-0.545073	NA	NA	NA	NA	NA	NA	NA	NA	NA
OBP	OBP_to_OB2	Ahr	FALSE	0.00134664	0.0216804	10.2775	-1.22148	NA	NA	NA	NA	NA	NA	NA	NA	NA
OBP	OBP_to_OB2	Ak5	FALSE	2e-06	6.2e-05	22.5963	-1.85007	NA	NA	NA	NA	NA	NA	NA	NA	NA
OBP	OBP_to_OB2	Akap12	FALSE	6.74e-09	3.07e-07	33.6086	-1.58069	NA	NA	NA	NA	NA	NA	NA	NA	NA
OBP	OBP_to_OB2	Akr1b8	FALSE	0.000759326	0.0131562	11.3381	-0.81902	NA	NA	NA	NA	NA	NA	NA	NA	NA
OBP	OBP_to_OB2	Aldh1a3	FALSE	0.00305328	0.0447958	8.77535	-1.46099	NA	NA	NA	NA	NA	NA	NA	NA	NA
OBP	OBP_to_OB2	Aldh1l2	FALSE	9.08e-10	4.8e-08	37.5129	0.901673	NA	NA	NA	NA	NA	NA	NA	NA	NA
OBP	OBP_to_OB2	Aldoc	FALSE	3.24e-11	2.14e-09	44.0258	1.18478	NA	NA	NA	NA	NA	NA	NA	NA	NA
OBP	OBP_to_OB2	Alyref	FALSE	1.85e-08	8.04e-07	31.6492	-0.796613	NA	NA	NA	NA	NA	NA	NA	NA	NA
OBP	OBP_to_OB2	Amhr2	FALSE	3.22e-15	3.21e-13	62.1336	2.03617	NA	NA	NA	NA	NA	NA	NA	NA	NA
OBP	OBP_to_OB2	Amot	FALSE	2.29e-06	7.01e-05	22.3332	-1.27509	NA	NA	NA	NA	NA	NA	NA	NA	NA
OBP	OBP_to_OB2	Angpt1	FALSE	1.82e-11	1.26e-09	45.1526	-1.77668	NA	NA	NA	NA	NA	NA	NA	NA	NA
OBP	OBP_to_OB2	Angpt4	FALSE	0.000559232	0.0100565	11.907	-0.872229	NA	NA	NA	NA	NA	NA	NA	NA	NA
OBP	OBP_to_OB2	Angptl2	FALSE	1.16e-08	5.17e-07	32.5477	-1.34934	NA	NA	NA	NA	NA	NA	NA	NA	NA
OBP	OBP_to_OB2	Ank2	FALSE	0.00248493	0.0372842	9.15166	-0.754261	NA	NA	NA	NA	NA	NA	NA	NA	NA
OBP	OBP_to_OB2	Ankle1	FALSE	0.00213472	0.0327269	9.42993	-1.67659	NA	NA	NA	NA	NA	NA	NA	NA	NA
OBP	OBP_to_OB2	Ankrd6	FALSE	8.66e-10	4.6e-08	37.6054	1.22923	NA	NA	NA	NA	NA	NA	NA	NA	NA
OBP	OBP_to_OB2	Anln	FALSE	2.14e-09	1.06e-07	35.8384	-2.04501	NA	NA	NA	NA	NA	NA	NA	NA	NA
OBP	OBP_to_OB2	Ano1	FALSE	2.22e-16	2.54e-14	67.2753	1.36404	NA	NA	NA	NA	NA	NA	NA	NA	NA
OBP	OBP_to_OB2	Anp32b	FALSE	0.000519081	0.009412	12.0458	-0.52991	NA	NA	NA	NA	NA	NA	NA	NA	NA
OBP	OBP_to_OB2	Antxr1	FALSE	0	0	140.695	-1.32261	NA	NA	NA	NA	NA	NA	NA	NA	NA
OBP	OBP_to_OB2	Anxa1	FALSE	0	0	139.936	-1.22755	NA	NA	NA	NA	NA	NA	NA	NA	NA
OBP	OBP_to_OB2	Anxa3	FALSE	0.00218912	0.03342	9.3838	-0.670139	NA	NA	NA	NA	NA	NA	NA	NA	NA
OBP	OBP_to_OB2	Aoc3	FALSE	1.05e-12	8.36e-11	50.749	-2.04858	NA	NA	NA	NA	NA	NA	NA	NA	NA
OBP	OBP_to_OB2	Ap1ar	FALSE	0.000107079	0.00229181	15.0076	-0.759965	NA	NA	NA	NA	NA	NA	NA	NA	NA
OBP	OBP_to_OB2	Apex1	FALSE	7.07e-07	2.36e-05	24.597	-0.780919	NA	NA	NA	NA	NA	NA	NA	NA	NA
OBP	OBP_to_OB2	Aprt	FALSE	7.88e-11	4.99e-09	42.2867	-0.720077	NA	NA	NA	NA	NA	NA	NA	NA	NA
OBP	OBP_to_OB2	Arap2	FALSE	0.000645463	0.0113841	11.6401	-1.01677	NA	NA	NA	NA	NA	NA	NA	NA	NA
OBP	OBP_to_OB2	Arhgap11a	FALSE	0.0001907	0.00385479	13.9206	-1.19896	NA	NA	NA	NA	NA	NA	NA	NA	NA
OBP	OBP_to_OB2	Arhgap24	FALSE	0.000202417	0.00405986	13.8085	0.816904	NA	NA	NA	NA	NA	NA	NA	NA	NA
OBP	OBP_to_OB2	Arhgap27os2	FALSE	0.000134274	0.00282975	14.5808	1.19644	NA	NA	NA	NA	NA	NA	NA	NA	NA
OBP	OBP_to_OB2	Arhgdig	FALSE	0.00255756	0.0382688	9.09895	-0.748508	NA	NA	NA	NA	NA	NA	NA	NA	NA
OBP	OBP_to_OB2	Arhgef25	FALSE	8.88e-16	9.5e-14	64.7182	-1.20241	NA	NA	NA	NA	NA	NA	NA	NA	NA
OBP	OBP_to_OB2	Arid5a	FALSE	0.00246984	0.0371343	9.16281	0.702752	NA	NA	NA	NA	NA	NA	NA	NA	NA
OBP	OBP_to_OB2	Arl6ip1	FALSE	1.91e-09	9.58e-08	36.0597	-0.891197	NA	NA	NA	NA	NA	NA	NA	NA	NA
OBP	OBP_to_OB2	Arpin	FALSE	5.22e-05	0.00120449	16.3667	-1.11658	NA	NA	NA	NA	NA	NA	NA	NA	NA
OBP	OBP_to_OB2	Arrdc4	FALSE	0	0	112.157	-1.69299	NA	NA	NA	NA	NA	NA	NA	NA	NA
OBP	OBP_to_OB2	Arxes1	FALSE	1.3e-10	7.98e-09	41.3118	-2.82231	NA	NA	NA	NA	NA	NA	NA	NA	NA
OBP	OBP_to_OB2	Arxes2	FALSE	1.78e-15	1.85e-13	63.3265	-2.16628	NA	NA	NA	NA	NA	NA	NA	NA	NA
OBP	OBP_to_OB2	Asb10	FALSE	0.000669676	0.0117522	11.5716	1.50032	NA	NA	NA	NA	NA	NA	NA	NA	NA
OBP	OBP_to_OB2	Ascl2	FALSE	0.00200958	0.0310262	9.54077	1.57331	NA	NA	NA	NA	NA	NA	NA	NA	NA
OBP	OBP_to_OB2	Asf1b	FALSE	7.98e-08	3.22e-06	28.8111	-1.7453	NA	NA	NA	NA	NA	NA	NA	NA	NA
OBP	OBP_to_OB2	Asic3	FALSE	4.24e-05	0.000990473	16.7619	-1.54616	NA	NA	NA	NA	NA	NA	NA	NA	NA
OBP	OBP_to_OB2	Asphd2	FALSE	0.00315572	0.0461436	8.71518	-1.18235	NA	NA	NA	NA	NA	NA	NA	NA	NA
OBP	OBP_to_OB2	Aspm	FALSE	0.000201417	0.0040452	13.8178	-1.60517	NA	NA	NA	NA	NA	NA	NA	NA	NA
OBP	OBP_to_OB2	Aspn	FALSE	0	0	259.128	-3.4317	NA	NA	NA	NA	NA	NA	NA	NA	NA
OBP	OBP_to_OB2	Ass1	FALSE	0.000143632	0.00299487	14.4539	-1.71801	NA	NA	NA	NA	NA	NA	NA	NA	NA
OBP	OBP_to_OB2	Atad2	FALSE	9.92e-08	3.87e-06	28.3898	-1.08709	NA	NA	NA	NA	NA	NA	NA	NA	NA
OBP	OBP_to_OB2	Atad3a	FALSE	0.000590738	0.0105449	11.8049	-0.76815	NA	NA	NA	NA	NA	NA	NA	NA	NA
OBP	OBP_to_OB2	Atad5	FALSE	3.45e-05	0.000823136	17.1523	-1.27962	NA	NA	NA	NA	NA	NA	NA	NA	NA
OBP	OBP_to_OB2	Atf3	FALSE	1.25e-11	8.83e-10	45.8977	1.02919	NA	NA	NA	NA	NA	NA	NA	NA	NA
OBP	OBP_to_OB2	Atg9b	FALSE	2.17e-05	0.000540256	18.0358	1.57876	NA	NA	NA	NA	NA	NA	NA	NA	NA
OBP	OBP_to_OB2	Atic	FALSE	4.82e-13	3.97e-11	52.2752	-1.0965	NA	NA	NA	NA	NA	NA	NA	NA	NA
OBP	OBP_to_OB2	Atl3	FALSE	0.000463507	0.0085034	12.257	-0.620207	NA	NA	NA	NA	NA	NA	NA	NA	NA
OBP	OBP_to_OB2	Atp1a3	FALSE	1.89e-05	0.000476922	18.3015	1.25129	NA	NA	NA	NA	NA	NA	NA	NA	NA
OBP	OBP_to_OB2	Atp1b3	FALSE	2.24e-07	8.16e-06	26.8161	0.684881	NA	NA	NA	NA	NA	NA	NA	NA	NA
OBP	OBP_to_OB2	Atp2b4	FALSE	0.000244682	0.00477359	13.4525	-0.796559	NA	NA	NA	NA	NA	NA	NA	NA	NA
OBP	OBP_to_OB2	Atp7b	FALSE	0.000285982	0.00550069	13.16	1.76127	NA	NA	NA	NA	NA	NA	NA	NA	NA
OBP	OBP_to_OB2	Atp8b1	FALSE	1.44e-06	4.56e-05	23.2328	-1.78242	NA	NA	NA	NA	NA	NA	NA	NA	NA
OBP	OBP_to_OB2	AU021092	FALSE	0	0	70.4392	2.7011	NA	NA	NA	NA	NA	NA	NA	NA	NA
OBP	OBP_to_OB2	Aunip	FALSE	0.000611327	0.0108768	11.7412	-1.91955	NA	NA	NA	NA	NA	NA	NA	NA	NA
OBP	OBP_to_OB2	Aurka	FALSE	4.65e-07	1.59e-05	25.4024	-1.98438	NA	NA	NA	NA	NA	NA	NA	NA	NA
OBP	OBP_to_OB2	Aurkb	FALSE	1.53e-09	7.76e-08	36.4895	-2.03371	NA	NA	NA	NA	NA	NA	NA	NA	NA
OBP	OBP_to_OB2	Avp	FALSE	0.00157544	0.024959	9.98823	1.70019	NA	NA	NA	NA	NA	NA	NA	NA	NA
OBP	OBP_to_OB2	Axl	FALSE	1.02e-07	3.99e-06	28.3265	-1.31135	NA	NA	NA	NA	NA	NA	NA	NA	NA
OBP	OBP_to_OB2	Azin2	FALSE	0.000135545	0.00285076	14.5631	-0.968483	NA	NA	NA	NA	NA	NA	NA	NA	NA
OBP	OBP_to_OB2	B2m	FALSE	0.00325649	0.0472688	8.65789	0.47941	NA	NA	NA	NA	NA	NA	NA	NA	NA
OBP	OBP_to_OB2	B3galnt1	FALSE	3.81e-05	0.000900087	16.9641	-1.19316	NA	NA	NA	NA	NA	NA	NA	NA	NA
OBP	OBP_to_OB2	B4galt4	FALSE	0.000280266	0.00540025	13.1979	-1.2939	NA	NA	NA	NA	NA	NA	NA	NA	NA
OBP	OBP_to_OB2	Bahcc1	FALSE	3.21e-06	9.51e-05	21.6897	-1.17264	NA	NA	NA	NA	NA	NA	NA	NA	NA
OBP	OBP_to_OB2	Bambi	FALSE	0	0	184.692	1.57361	NA	NA	NA	NA	NA	NA	NA	NA	NA
OBP	OBP_to_OB2	Bard1	FALSE	0.000443916	0.00817816	12.3376	-1.70101	NA	NA	NA	NA	NA	NA	NA	NA	NA
OBP	OBP_to_OB2	BC055402	FALSE	0.00124535	0.0202409	10.4218	3.09817	NA	NA	NA	NA	NA	NA	NA	NA	NA
OBP	OBP_to_OB2	BC067074	FALSE	0.00140873	0.0226299	10.1943	-1.63163	NA	NA	NA	NA	NA	NA	NA	NA	NA
OBP	OBP_to_OB2	Bcan	FALSE	1.73e-06	5.43e-05	22.8741	1.39216	NA	NA	NA	NA	NA	NA	NA	NA	NA
OBP	OBP_to_OB2	Bcap29	FALSE	1.89e-06	5.9e-05	22.6991	-1.10795	NA	NA	NA	NA	NA	NA	NA	NA	NA
OBP	OBP_to_OB2	Bcl2l11	FALSE	0.000941972	0.0159289	10.9383	0.682177	NA	NA	NA	NA	NA	NA	NA	NA	NA
OBP	OBP_to_OB2	Bcl9l	FALSE	0.000248888	0.00484699	13.4205	-0.69694	NA	NA	NA	NA	NA	NA	NA	NA	NA
OBP	OBP_to_OB2	Bend5	FALSE	1.02e-09	5.3e-08	37.291	1.66593	NA	NA	NA	NA	NA	NA	NA	NA	NA
OBP	OBP_to_OB2	Bex3	FALSE	5.39e-09	2.52e-07	34.0421	-0.849686	NA	NA	NA	NA	NA	NA	NA	NA	NA
OBP	OBP_to_OB2	Bglap	FALSE	0	0	317.438	2.34247	NA	NA	NA	NA	NA	NA	NA	NA	NA
OBP	OBP_to_OB2	Bglap2	FALSE	0	0	210.492	2.27353	NA	NA	NA	NA	NA	NA	NA	NA	NA
OBP	OBP_to_OB2	Bglap3	FALSE	0	0	249.722	2.31898	NA	NA	NA	NA	NA	NA	NA	NA	NA
OBP	OBP_to_OB2	Bhlha15	FALSE	0.00257958	0.0385718	9.08327	1.65737	NA	NA	NA	NA	NA	NA	NA	NA	NA
OBP	OBP_to_OB2	Birc5	FALSE	1.35e-09	6.92e-08	36.7383	-1.81729	NA	NA	NA	NA	NA	NA	NA	NA	NA
OBP	OBP_to_OB2	Bmp1	FALSE	1.76e-11	1.21e-09	45.224	0.737706	NA	NA	NA	NA	NA	NA	NA	NA	NA
OBP	OBP_to_OB2	Bmp3	FALSE	9.42e-10	4.96e-08	37.4405	1.0144	NA	NA	NA	NA	NA	NA	NA	NA	NA
OBP	OBP_to_OB2	Bmp5	FALSE	3.49e-08	1.47e-06	30.4162	-0.965043	NA	NA	NA	NA	NA	NA	NA	NA	NA
OBP	OBP_to_OB2	Bmp8a	FALSE	6.52e-08	2.65e-06	29.2029	0.908488	NA	NA	NA	NA	NA	NA	NA	NA	NA
OBP	OBP_to_OB2	Bmp8b	FALSE	2.87e-11	1.91e-09	44.2641	2.02938	NA	NA	NA	NA	NA	NA	NA	NA	NA
OBP	OBP_to_OB2	Bok	FALSE	0	0	89.394	-1.42522	NA	NA	NA	NA	NA	NA	NA	NA	NA
OBP	OBP_to_OB2	Bop1	FALSE	0.000167906	0.00345157	14.16	0.725096	NA	NA	NA	NA	NA	NA	NA	NA	NA
OBP	OBP_to_OB2	Brca1	FALSE	9.87e-05	0.00213312	15.1616	-1.39985	NA	NA	NA	NA	NA	NA	NA	NA	NA
OBP	OBP_to_OB2	Brca2	FALSE	2.07e-08	8.93e-07	31.4237	-1.57163	NA	NA	NA	NA	NA	NA	NA	NA	NA
OBP	OBP_to_OB2	Brix1	FALSE	3.58e-06	0.000104252	21.4767	-0.762026	NA	NA	NA	NA	NA	NA	NA	NA	NA
OBP	OBP_to_OB2	Bsg	FALSE	4.67e-13	3.88e-11	52.3375	0.736629	NA	NA	NA	NA	NA	NA	NA	NA	NA
OBP	OBP_to_OB2	Bub1	FALSE	1.45e-08	6.41e-07	32.1155	-2.17543	NA	NA	NA	NA	NA	NA	NA	NA	NA
OBP	OBP_to_OB2	Bub1b	FALSE	0.000708051	0.0123561	11.468	-1.24861	NA	NA	NA	NA	NA	NA	NA	NA	NA
OBP	OBP_to_OB2	Bub3	FALSE	0.000888144	0.015077	11.0473	-0.605125	NA	NA	NA	NA	NA	NA	NA	NA	NA
OBP	OBP_to_OB2	Bzw2	FALSE	2.06e-08	8.91e-07	31.4333	-0.858676	NA	NA	NA	NA	NA	NA	NA	NA	NA
OBP	OBP_to_OB2	C130050O18Rik	FALSE	8.13e-08	3.27e-06	28.7751	1.97689	NA	NA	NA	NA	NA	NA	NA	NA	NA
OBP	OBP_to_OB2	C1qbp	FALSE	1.74e-06	5.45e-05	22.8632	-0.652192	NA	NA	NA	NA	NA	NA	NA	NA	NA
OBP	OBP_to_OB2	C1qtnf3	FALSE	3.01e-12	2.27e-10	48.6815	-3.13796	NA	NA	NA	NA	NA	NA	NA	NA	NA
OBP	OBP_to_OB2	C1qtnf4	FALSE	0.00175449	0.0275161	9.79015	0.781735	NA	NA	NA	NA	NA	NA	NA	NA	NA
OBP	OBP_to_OB2	C1s1	FALSE	0.00014392	0.00299802	14.4501	-1.56168	NA	NA	NA	NA	NA	NA	NA	NA	NA
OBP	OBP_to_OB2	C3	FALSE	0.00029234	0.00560816	13.1188	1.81223	NA	NA	NA	NA	NA	NA	NA	NA	NA
OBP	OBP_to_OB2	C330027C09Rik	FALSE	0.000241955	0.00474159	13.4735	-1.21181	NA	NA	NA	NA	NA	NA	NA	NA	NA
OBP	OBP_to_OB2	C430049E01Rik	FALSE	0	0	96.6119	3.71893	NA	NA	NA	NA	NA	NA	NA	NA	NA
OBP	OBP_to_OB2	Cachd1	FALSE	0.000212678	0.00423628	13.7156	-0.949337	NA	NA	NA	NA	NA	NA	NA	NA	NA
OBP	OBP_to_OB2	Cacna1a	FALSE	0.00292672	0.0431711	8.8526	-0.977236	NA	NA	NA	NA	NA	NA	NA	NA	NA
OBP	OBP_to_OB2	Cacna1g	FALSE	0.000483326	0.0088297	12.1789	-1.69475	NA	NA	NA	NA	NA	NA	NA	NA	NA
OBP	OBP_to_OB2	Cacnb3	FALSE	8.42e-07	2.77e-05	24.2587	0.816195	NA	NA	NA	NA	NA	NA	NA	NA	NA
OBP	OBP_to_OB2	Cacng7	FALSE	0.000289097	0.00555081	13.1397	-1.19793	NA	NA	NA	NA	NA	NA	NA	NA	NA
OBP	OBP_to_OB2	Cacybp	FALSE	8.49e-08	3.39e-06	28.6899	-0.753881	NA	NA	NA	NA	NA	NA	NA	NA	NA
OBP	OBP_to_OB2	Cadm1	FALSE	0	0	183.854	1.5992	NA	NA	NA	NA	NA	NA	NA	NA	NA
OBP	OBP_to_OB2	Cald1	FALSE	0	0	376.908	-1.32211	NA	NA	NA	NA	NA	NA	NA	NA	NA
OBP	OBP_to_OB2	Calhm2	FALSE	9.78e-07	3.18e-05	23.9702	-1.28957	NA	NA	NA	NA	NA	NA	NA	NA	NA
OBP	OBP_to_OB2	Camk2g	FALSE	3.33e-06	9.76e-05	21.619	-0.812207	NA	NA	NA	NA	NA	NA	NA	NA	NA
OBP	OBP_to_OB2	Camk4	FALSE	5.41e-05	0.00124321	16.2987	-2.14065	NA	NA	NA	NA	NA	NA	NA	NA	NA
OBP	OBP_to_OB2	Camkk2	FALSE	1.43e-05	0.000373634	18.8253	-0.800665	NA	NA	NA	NA	NA	NA	NA	NA	NA
OBP	OBP_to_OB2	Capg	FALSE	0.000184745	0.00375527	13.9802	-0.726724	NA	NA	NA	NA	NA	NA	NA	NA	NA
OBP	OBP_to_OB2	Caprin1	FALSE	0.0012282	0.0199797	10.4474	-0.539255	NA	NA	NA	NA	NA	NA	NA	NA	NA
OBP	OBP_to_OB2	Car12	FALSE	0	0	348.186	2.66512	NA	NA	NA	NA	NA	NA	NA	NA	NA
OBP	OBP_to_OB2	Carm1	FALSE	0.000312399	0.00597197	12.9945	-0.764445	NA	NA	NA	NA	NA	NA	NA	NA	NA
OBP	OBP_to_OB2	Carmil1	FALSE	5.69e-07	1.93e-05	25.015	0.962173	NA	NA	NA	NA	NA	NA	NA	NA	NA
OBP	OBP_to_OB2	Casp7	FALSE	7.4e-05	0.00164937	15.7066	-1.09728	NA	NA	NA	NA	NA	NA	NA	NA	NA
OBP	OBP_to_OB2	Cav1	FALSE	5.1e-10	2.8e-08	38.6396	-1.89402	NA	NA	NA	NA	NA	NA	NA	NA	NA
OBP	OBP_to_OB2	Cav2	FALSE	0.000461183	0.00847481	12.2664	-1.06513	NA	NA	NA	NA	NA	NA	NA	NA	NA
OBP	OBP_to_OB2	Cavin1	FALSE	9.99e-16	1.06e-13	64.4044	-0.989115	NA	NA	NA	NA	NA	NA	NA	NA	NA
OBP	OBP_to_OB2	Cbx5	FALSE	2.2e-06	6.76e-05	22.4094	-0.738209	NA	NA	NA	NA	NA	NA	NA	NA	NA
OBP	OBP_to_OB2	Ccbe1	FALSE	0.000569152	0.0102097	11.8743	-1.84077	NA	NA	NA	NA	NA	NA	NA	NA	NA
OBP	OBP_to_OB2	Ccdc102a	FALSE	1.48e-05	0.000383801	18.7628	-1.81145	NA	NA	NA	NA	NA	NA	NA	NA	NA
OBP	OBP_to_OB2	Ccdc112	FALSE	6.09e-06	0.000170452	20.4597	-1.22591	NA	NA	NA	NA	NA	NA	NA	NA	NA
OBP	OBP_to_OB2	Ccdc12	FALSE	9.31e-11	5.82e-09	41.9614	-0.774609	NA	NA	NA	NA	NA	NA	NA	NA	NA
OBP	OBP_to_OB2	Ccdc34	FALSE	1.72e-09	8.67e-08	36.2638	-0.982479	NA	NA	NA	NA	NA	NA	NA	NA	NA
OBP	OBP_to_OB2	Ccdc82	FALSE	0.000972959	0.0163894	10.8783	-0.835483	NA	NA	NA	NA	NA	NA	NA	NA	NA
OBP	OBP_to_OB2	Ccna2	FALSE	1.79e-08	7.81e-07	31.7109	-2.03193	NA	NA	NA	NA	NA	NA	NA	NA	NA
OBP	OBP_to_OB2	Ccnb2	FALSE	2.05e-07	7.55e-06	26.9849	-1.89045	NA	NA	NA	NA	NA	NA	NA	NA	NA
OBP	OBP_to_OB2	Ccnc	FALSE	2.4e-05	0.000593105	17.8431	-0.901789	NA	NA	NA	NA	NA	NA	NA	NA	NA
OBP	OBP_to_OB2	Ccnd1	FALSE	1.55e-15	1.63e-13	63.5537	-1.02505	NA	NA	NA	NA	NA	NA	NA	NA	NA
OBP	OBP_to_OB2	Ccnd2	FALSE	0.000184098	0.00374561	13.9868	-0.621769	NA	NA	NA	NA	NA	NA	NA	NA	NA
OBP	OBP_to_OB2	Ccne1	FALSE	0.00239132	0.036103	9.22194	-0.862494	NA	NA	NA	NA	NA	NA	NA	NA	NA
OBP	OBP_to_OB2	Ccng1	FALSE	1.01e-05	0.000267829	19.5	-0.667874	NA	NA	NA	NA	NA	NA	NA	NA	NA
OBP	OBP_to_OB2	Ccpg1	FALSE	0.000874874	0.0149097	11.0753	0.686891	NA	NA	NA	NA	NA	NA	NA	NA	NA
OBP	OBP_to_OB2	Ccsap	FALSE	0.00231699	0.0351768	9.27977	-1.4263	NA	NA	NA	NA	NA	NA	NA	NA	NA
OBP	OBP_to_OB2	Cct3	FALSE	2.44e-06	7.42e-05	22.2165	-0.642021	NA	NA	NA	NA	NA	NA	NA	NA	NA
OBP	OBP_to_OB2	Cct4	FALSE	6.76e-05	0.00151932	15.8775	-0.556122	NA	NA	NA	NA	NA	NA	NA	NA	NA
OBP	OBP_to_OB2	Cct8	FALSE	8.4e-10	4.49e-08	37.6643	-0.657085	NA	NA	NA	NA	NA	NA	NA	NA	NA
OBP	OBP_to_OB2	Cd109	FALSE	4.77e-09	2.25e-07	34.28	0.808114	NA	NA	NA	NA	NA	NA	NA	NA	NA
OBP	OBP_to_OB2	Cd1d1	FALSE	0	0	147.787	1.93092	NA	NA	NA	NA	NA	NA	NA	NA	NA
OBP	OBP_to_OB2	Cd24a	FALSE	7e-08	2.83e-06	29.0651	1.5006	NA	NA	NA	NA	NA	NA	NA	NA	NA
OBP	OBP_to_OB2	Cdc20	FALSE	6.46e-10	3.53e-08	38.176	-2.28884	NA	NA	NA	NA	NA	NA	NA	NA	NA
OBP	OBP_to_OB2	Cdc42ep5	FALSE	1.11e-16	1.3e-14	69.643	-1.85477	NA	NA	NA	NA	NA	NA	NA	NA	NA
OBP	OBP_to_OB2	Cdc42se1	FALSE	0.00122619	0.0199768	10.4505	-0.709632	NA	NA	NA	NA	NA	NA	NA	NA	NA
OBP	OBP_to_OB2	Cdc45	FALSE	0.000103299	0.0022196	15.0754	-1.20896	NA	NA	NA	NA	NA	NA	NA	NA	NA
OBP	OBP_to_OB2	Cdc6	FALSE	1.37e-07	5.19e-06	27.7623	-2.0333	NA	NA	NA	NA	NA	NA	NA	NA	NA
OBP	OBP_to_OB2	Cdca2	FALSE	0.00151808	0.0242336	10.0565	-1.30292	NA	NA	NA	NA	NA	NA	NA	NA	NA
OBP	OBP_to_OB2	Cdca3	FALSE	7.24e-05	0.00161786	15.747	-1.33968	NA	NA	NA	NA	NA	NA	NA	NA	NA
OBP	OBP_to_OB2	Cdca4	FALSE	0.00121514	0.0198264	10.4672	-0.746778	NA	NA	NA	NA	NA	NA	NA	NA	NA
OBP	OBP_to_OB2	Cdca5	FALSE	3.89e-05	0.000914216	16.9262	-1.5275	NA	NA	NA	NA	NA	NA	NA	NA	NA
OBP	OBP_to_OB2	Cdca7l	FALSE	1.61e-07	6.04e-06	27.4563	-1.58705	NA	NA	NA	NA	NA	NA	NA	NA	NA
OBP	OBP_to_OB2	Cdca8	FALSE	3.16e-10	1.81e-08	39.5748	-1.84805	NA	NA	NA	NA	NA	NA	NA	NA	NA
OBP	OBP_to_OB2	Cdh13	FALSE	6.03e-09	2.77e-07	33.8259	-1.29142	NA	NA	NA	NA	NA	NA	NA	NA	NA
OBP	OBP_to_OB2	Cdh3	FALSE	0.00115478	0.019039	10.5613	-2.56148	NA	NA	NA	NA	NA	NA	NA	NA	NA
OBP	OBP_to_OB2	Cdk1	FALSE	8.8e-10	4.66e-08	37.575	-1.47991	NA	NA	NA	NA	NA	NA	NA	NA	NA
OBP	OBP_to_OB2	Cdk18	FALSE	0.00205485	0.0316357	9.49989	-1.18488	NA	NA	NA	NA	NA	NA	NA	NA	NA
OBP	OBP_to_OB2	Cdk4	FALSE	0.00182274	0.0284433	9.72	-0.519329	NA	NA	NA	NA	NA	NA	NA	NA	NA
OBP	OBP_to_OB2	Cdkl1	FALSE	2.06e-06	6.35e-05	22.5429	-2.21834	NA	NA	NA	NA	NA	NA	NA	NA	NA
OBP	OBP_to_OB2	Cdkl5	FALSE	0.00318693	0.046506	8.69724	0.837686	NA	NA	NA	NA	NA	NA	NA	NA	NA
OBP	OBP_to_OB2	Cdkn3	FALSE	4.77e-06	0.000135595	20.9274	-1.79121	NA	NA	NA	NA	NA	NA	NA	NA	NA
OBP	OBP_to_OB2	Cdo1	FALSE	0.0001793	0.0036548	14.0365	0.716272	NA	NA	NA	NA	NA	NA	NA	NA	NA
OBP	OBP_to_OB2	Cenpa	FALSE	2.63e-07	9.43e-06	26.501	-1.89176	NA	NA	NA	NA	NA	NA	NA	NA	NA
OBP	OBP_to_OB2	Cenpc1	FALSE	0.00121019	0.0198048	10.4747	-0.764426	NA	NA	NA	NA	NA	NA	NA	NA	NA
OBP	OBP_to_OB2	Cenpe	FALSE	2.72e-09	1.33e-07	35.3738	-2.28312	NA	NA	NA	NA	NA	NA	NA	NA	NA
OBP	OBP_to_OB2	Cenpf	FALSE	9.39e-08	3.68e-06	28.4965	-2.25609	NA	NA	NA	NA	NA	NA	NA	NA	NA
OBP	OBP_to_OB2	Cenph	FALSE	1.89e-07	6.99e-06	27.1381	-1.72338	NA	NA	NA	NA	NA	NA	NA	NA	NA
OBP	OBP_to_OB2	Cenpi	FALSE	7.64e-06	0.000207768	20.0253	-1.44561	NA	NA	NA	NA	NA	NA	NA	NA	NA
OBP	OBP_to_OB2	Cenpm	FALSE	1.78e-10	1.07e-08	40.6929	-1.94121	NA	NA	NA	NA	NA	NA	NA	NA	NA
OBP	OBP_to_OB2	Cenpn	FALSE	7.94e-07	2.62e-05	24.3734	-1.7058	NA	NA	NA	NA	NA	NA	NA	NA	NA
OBP	OBP_to_OB2	Cenpp	FALSE	1.97e-11	1.35e-09	44.998	-2.0464	NA	NA	NA	NA	NA	NA	NA	NA	NA
OBP	OBP_to_OB2	Cenpq	FALSE	1.51e-05	0.000390317	18.7239	-1.12557	NA	NA	NA	NA	NA	NA	NA	NA	NA
OBP	OBP_to_OB2	Cenps	FALSE	7.32e-05	0.00163507	15.725	-1.02064	NA	NA	NA	NA	NA	NA	NA	NA	NA
OBP	OBP_to_OB2	Cenpw	FALSE	9.28e-10	4.89e-08	37.4705	-1.31154	NA	NA	NA	NA	NA	NA	NA	NA	NA
OBP	OBP_to_OB2	Cep128	FALSE	0.00286623	0.0423935	8.89072	-1.22593	NA	NA	NA	NA	NA	NA	NA	NA	NA
OBP	OBP_to_OB2	Cep192	FALSE	0.000137331	0.00288553	14.5384	-0.880683	NA	NA	NA	NA	NA	NA	NA	NA	NA
OBP	OBP_to_OB2	Cep55	FALSE	0.000243914	0.00476287	13.4584	-1.64749	NA	NA	NA	NA	NA	NA	NA	NA	NA
OBP	OBP_to_OB2	Cercam	FALSE	0.000282315	0.00543494	13.1842	0.637522	NA	NA	NA	NA	NA	NA	NA	NA	NA
OBP	OBP_to_OB2	Cers6	FALSE	8.63e-08	3.43e-06	28.6602	-1.21535	NA	NA	NA	NA	NA	NA	NA	NA	NA
OBP	OBP_to_OB2	Cfh	FALSE	7.19e-05	0.00160925	15.7609	0.707902	NA	NA	NA	NA	NA	NA	NA	NA	NA
OBP	OBP_to_OB2	Cgref1	FALSE	0	0	328.782	1.8289	NA	NA	NA	NA	NA	NA	NA	NA	NA
OBP	OBP_to_OB2	Chaf1a	FALSE	6.5e-06	0.000179852	20.335	-1.25884	NA	NA	NA	NA	NA	NA	NA	NA	NA
OBP	OBP_to_OB2	Chaf1b	FALSE	1.07e-06	3.46e-05	23.7917	-1.23811	NA	NA	NA	NA	NA	NA	NA	NA	NA
OBP	OBP_to_OB2	Chmp4c	FALSE	9.95e-14	8.94e-12	55.3763	2.41446	NA	NA	NA	NA	NA	NA	NA	NA	NA
OBP	OBP_to_OB2	Chn1	FALSE	0.000236364	0.00464452	13.5174	-1.11524	NA	NA	NA	NA	NA	NA	NA	NA	NA
OBP	OBP_to_OB2	Chst11	FALSE	2.12e-07	7.76e-06	26.9209	0.789881	NA	NA	NA	NA	NA	NA	NA	NA	NA
OBP	OBP_to_OB2	Chst13	FALSE	2.71e-13	2.28e-11	53.4102	1.68859	NA	NA	NA	NA	NA	NA	NA	NA	NA
OBP	OBP_to_OB2	Chst2	FALSE	0.0014348	0.0230316	10.1605	-0.881169	NA	NA	NA	NA	NA	NA	NA	NA	NA
OBP	OBP_to_OB2	Chtf18	FALSE	2e-05	0.000502975	18.1939	-1.60519	NA	NA	NA	NA	NA	NA	NA	NA	NA
OBP	OBP_to_OB2	Cidea	FALSE	0.00206747	0.0317852	9.48865	3.24239	NA	NA	NA	NA	NA	NA	NA	NA	NA
OBP	OBP_to_OB2	Cit	FALSE	0.000197393	0.00398221	13.8557	-1.45129	NA	NA	NA	NA	NA	NA	NA	NA	NA
OBP	OBP_to_OB2	Cited4	FALSE	0.00155978	0.0247467	10.0066	1.20908	NA	NA	NA	NA	NA	NA	NA	NA	NA
OBP	OBP_to_OB2	Ckap2	FALSE	2.47e-10	1.44e-08	40.0581	-2.01304	NA	NA	NA	NA	NA	NA	NA	NA	NA
OBP	OBP_to_OB2	Ckap2l	FALSE	1.16e-08	5.17e-07	32.5445	-2.06333	NA	NA	NA	NA	NA	NA	NA	NA	NA
OBP	OBP_to_OB2	Cks1b	FALSE	1.22e-15	1.29e-13	63.9675	-1.32069	NA	NA	NA	NA	NA	NA	NA	NA	NA
OBP	OBP_to_OB2	Cks2	FALSE	3.73e-10	2.09e-08	39.2501	-1.01291	NA	NA	NA	NA	NA	NA	NA	NA	NA
OBP	OBP_to_OB2	Clasp2	FALSE	0.00062842	0.0111356	11.6898	-0.645314	NA	NA	NA	NA	NA	NA	NA	NA	NA
OBP	OBP_to_OB2	Clcn3	FALSE	7.98e-07	2.63e-05	24.3629	0.869638	NA	NA	NA	NA	NA	NA	NA	NA	NA
OBP	OBP_to_OB2	Cldn10	FALSE	8.6e-12	6.2e-10	46.6241	-1.98239	NA	NA	NA	NA	NA	NA	NA	NA	NA
OBP	OBP_to_OB2	Clec2d	FALSE	3.21e-06	9.51e-05	21.6872	-1.42465	NA	NA	NA	NA	NA	NA	NA	NA	NA
OBP	OBP_to_OB2	Clic1	FALSE	0.000644841	0.0113841	11.6419	-0.555461	NA	NA	NA	NA	NA	NA	NA	NA	NA
OBP	OBP_to_OB2	Clip3	FALSE	6.69e-06	0.000184186	20.2798	-0.974702	NA	NA	NA	NA	NA	NA	NA	NA	NA
OBP	OBP_to_OB2	Clmp	FALSE	0.00215525	0.0330185	9.41238	-0.688808	NA	NA	NA	NA	NA	NA	NA	NA	NA
OBP	OBP_to_OB2	Clspn	FALSE	5.86e-08	2.39e-06	29.4085	-1.89941	NA	NA	NA	NA	NA	NA	NA	NA	NA
OBP	OBP_to_OB2	Clstn1	FALSE	0.0024475	0.0368746	9.17943	-0.713162	NA	NA	NA	NA	NA	NA	NA	NA	NA
OBP	OBP_to_OB2	Cmss1	FALSE	2.85e-05	0.00069509	17.5134	-0.886833	NA	NA	NA	NA	NA	NA	NA	NA	NA
OBP	OBP_to_OB2	Cmtm3	FALSE	0	0	116.714	-2.10333	NA	NA	NA	NA	NA	NA	NA	NA	NA
OBP	OBP_to_OB2	Cmtm7	FALSE	0.00200108	0.0309169	9.54854	-0.562788	NA	NA	NA	NA	NA	NA	NA	NA	NA
OBP	OBP_to_OB2	Cnbp	FALSE	3.24e-06	9.57e-05	21.667	-0.601569	NA	NA	NA	NA	NA	NA	NA	NA	NA
OBP	OBP_to_OB2	Cnn2	FALSE	4.44e-16	4.97e-14	66.1871	-0.887535	NA	NA	NA	NA	NA	NA	NA	NA	NA
OBP	OBP_to_OB2	Cnn3	FALSE	0	0	115.522	-1.19158	NA	NA	NA	NA	NA	NA	NA	NA	NA
OBP	OBP_to_OB2	Cnnm2	FALSE	1.72e-09	8.65e-08	36.2732	1.10181	NA	NA	NA	NA	NA	NA	NA	NA	NA
OBP	OBP_to_OB2	Cnpy2	FALSE	1.69e-07	6.32e-06	27.3582	0.583345	NA	NA	NA	NA	NA	NA	NA	NA	NA
OBP	OBP_to_OB2	Cntln	FALSE	1.89e-07	6.99e-06	27.1393	-1.18373	NA	NA	NA	NA	NA	NA	NA	NA	NA
OBP	OBP_to_OB2	Cobll1	FALSE	0.000286416	0.00550418	13.1572	-1.02781	NA	NA	NA	NA	NA	NA	NA	NA	NA
OBP	OBP_to_OB2	Col11a1	FALSE	0	0	394.774	1.77947	NA	NA	NA	NA	NA	NA	NA	NA	NA
OBP	OBP_to_OB2	Col11a2	FALSE	0	0	578.434	2.77493	NA	NA	NA	NA	NA	NA	NA	NA	NA
OBP	OBP_to_OB2	Col12a1	FALSE	0	0	210.772	-1.76282	NA	NA	NA	NA	NA	NA	NA	NA	NA
OBP	OBP_to_OB2	Col13a1	FALSE	0	0	155.511	2.55848	NA	NA	NA	NA	NA	NA	NA	NA	NA
OBP	OBP_to_OB2	Col18a1	FALSE	0.00233151	0.0353467	9.26832	-1.01112	NA	NA	NA	NA	NA	NA	NA	NA	NA
OBP	OBP_to_OB2	Col1a1	FALSE	0	0	277.963	1.37875	NA	NA	NA	NA	NA	NA	NA	NA	NA
OBP	OBP_to_OB2	Col1a2	FALSE	0	0	311.159	1.3272	NA	NA	NA	NA	NA	NA	NA	NA	NA
OBP	OBP_to_OB2	Col22a1	FALSE	0	0	197.297	2.90366	NA	NA	NA	NA	NA	NA	NA	NA	NA
OBP	OBP_to_OB2	Col24a1	FALSE	0	0	103.784	2.84366	NA	NA	NA	NA	NA	NA	NA	NA	NA
OBP	OBP_to_OB2	Col27a1	FALSE	0.00036748	0.00692786	12.6907	-0.975322	NA	NA	NA	NA	NA	NA	NA	NA	NA
OBP	OBP_to_OB2	Col3a1	FALSE	0	0	210.125	-1.93023	NA	NA	NA	NA	NA	NA	NA	NA	NA
OBP	OBP_to_OB2	Col4a1	FALSE	0	0	80.6267	-1.86624	NA	NA	NA	NA	NA	NA	NA	NA	NA
OBP	OBP_to_OB2	Col4a2	FALSE	1.65e-14	1.54e-12	58.9091	-1.62702	NA	NA	NA	NA	NA	NA	NA	NA	NA
OBP	OBP_to_OB2	Col5a2	FALSE	0	0	137.434	0.924284	NA	NA	NA	NA	NA	NA	NA	NA	NA
OBP	OBP_to_OB2	Col5a3	FALSE	8.39e-06	0.000226847	19.8479	-1.79629	NA	NA	NA	NA	NA	NA	NA	NA	NA
OBP	OBP_to_OB2	Col6a1	FALSE	0	0	146.856	-1.20834	NA	NA	NA	NA	NA	NA	NA	NA	NA
OBP	OBP_to_OB2	Col6a2	FALSE	0	0	156.3	-1.32772	NA	NA	NA	NA	NA	NA	NA	NA	NA
OBP	OBP_to_OB2	Col6a3	FALSE	0	0	186.411	-1.41744	NA	NA	NA	NA	NA	NA	NA	NA	NA
OBP	OBP_to_OB2	Col8a1	FALSE	0	0	511.531	-3.10703	NA	NA	NA	NA	NA	NA	NA	NA	NA
OBP	OBP_to_OB2	Col8a2	FALSE	2.5e-13	2.13e-11	53.5696	-2.29485	NA	NA	NA	NA	NA	NA	NA	NA	NA
OBP	OBP_to_OB2	Colec12	FALSE	0.00300608	0.0441627	8.80377	-0.540821	NA	NA	NA	NA	NA	NA	NA	NA	NA
OBP	OBP_to_OB2	Colgalt2	FALSE	0.00343542	0.0495041	8.56046	1.19958	NA	NA	NA	NA	NA	NA	NA	NA	NA
OBP	OBP_to_OB2	Comtd1	FALSE	0.00238494	0.0360316	9.22683	-0.863124	NA	NA	NA	NA	NA	NA	NA	NA	NA
OBP	OBP_to_OB2	Coprs	FALSE	0.00316556	0.0462566	8.7095	-0.750604	NA	NA	NA	NA	NA	NA	NA	NA	NA
OBP	OBP_to_OB2	Cox6a1	FALSE	4.1e-06	0.000117663	21.2168	0.58175	NA	NA	NA	NA	NA	NA	NA	NA	NA
OBP	OBP_to_OB2	Cox6b2	FALSE	1.05e-09	5.47e-08	37.2224	-1.45063	NA	NA	NA	NA	NA	NA	NA	NA	NA
OBP	OBP_to_OB2	Cox8b	FALSE	0.00236864	0.0358597	9.23939	4.09279	NA	NA	NA	NA	NA	NA	NA	NA	NA
OBP	OBP_to_OB2	Cp	FALSE	1.88e-07	6.95e-06	27.155	-1.08665	NA	NA	NA	NA	NA	NA	NA	NA	NA
OBP	OBP_to_OB2	Cpe	FALSE	5.59e-06	0.000157243	20.6239	0.621328	NA	NA	NA	NA	NA	NA	NA	NA	NA
OBP	OBP_to_OB2	Cpne5	FALSE	3.66e-05	0.000870192	17.0384	1.30561	NA	NA	NA	NA	NA	NA	NA	NA	NA
OBP	OBP_to_OB2	Cpt1c	FALSE	0.000269113	0.00520373	13.274	-0.773539	NA	NA	NA	NA	NA	NA	NA	NA	NA
OBP	OBP_to_OB2	Cpxm1	FALSE	1.16e-05	0.000305006	19.2355	-1.0074	NA	NA	NA	NA	NA	NA	NA	NA	NA
OBP	OBP_to_OB2	Cpz	FALSE	5.55e-15	5.46e-13	61.0505	2.83242	NA	NA	NA	NA	NA	NA	NA	NA	NA
OBP	OBP_to_OB2	Crip1	FALSE	1.75e-11	1.21e-09	45.2272	-0.933263	NA	NA	NA	NA	NA	NA	NA	NA	NA
OBP	OBP_to_OB2	Crlf1	FALSE	0	0	95.5669	-1.70133	NA	NA	NA	NA	NA	NA	NA	NA	NA
OBP	OBP_to_OB2	Crtap	FALSE	0.00196044	0.0304181	9.58621	0.505796	NA	NA	NA	NA	NA	NA	NA	NA	NA
OBP	OBP_to_OB2	Cryl1	FALSE	0.00043939	0.00810163	12.3568	-0.953312	NA	NA	NA	NA	NA	NA	NA	NA	NA
OBP	OBP_to_OB2	Csdc2	FALSE	2.38e-10	1.4e-08	40.1272	2.45614	NA	NA	NA	NA	NA	NA	NA	NA	NA
OBP	OBP_to_OB2	Cse1l	FALSE	0.000119553	0.00253395	14.7997	-0.758089	NA	NA	NA	NA	NA	NA	NA	NA	NA
OBP	OBP_to_OB2	Csf1	FALSE	6.44e-15	6.3e-13	60.7638	-1.07301	NA	NA	NA	NA	NA	NA	NA	NA	NA
OBP	OBP_to_OB2	Csmd1	FALSE	1.32e-06	4.21e-05	23.396	-2.58754	NA	NA	NA	NA	NA	NA	NA	NA	NA
OBP	OBP_to_OB2	Csrp1	FALSE	1.11e-14	1.06e-12	59.6989	-0.944008	NA	NA	NA	NA	NA	NA	NA	NA	NA
OBP	OBP_to_OB2	Csrp2	FALSE	0	0	229.042	-1.78494	NA	NA	NA	NA	NA	NA	NA	NA	NA
OBP	OBP_to_OB2	CT025619.1	FALSE	1.7e-05	0.000436296	18.4936	-1.25453	NA	NA	NA	NA	NA	NA	NA	NA	NA
OBP	OBP_to_OB2	Ctgf	FALSE	9.33e-15	9.05e-13	60.0306	-1.11673	NA	NA	NA	NA	NA	NA	NA	NA	NA
OBP	OBP_to_OB2	Cthrc1	FALSE	5.55e-16	6.15e-14	65.6651	1.10452	NA	NA	NA	NA	NA	NA	NA	NA	NA
OBP	OBP_to_OB2	Ctla2a	FALSE	6.92e-10	3.76e-08	38.0442	-1.9461	NA	NA	NA	NA	NA	NA	NA	NA	NA
OBP	OBP_to_OB2	Ctnnd1	FALSE	4.8e-08	1.98e-06	29.7945	-0.738935	NA	NA	NA	NA	NA	NA	NA	NA	NA
OBP	OBP_to_OB2	Ctsh	FALSE	5.57e-06	0.000156979	20.6296	0.652509	NA	NA	NA	NA	NA	NA	NA	NA	NA
OBP	OBP_to_OB2	Ctso	FALSE	0.00160816	0.0254219	9.95039	-0.814583	NA	NA	NA	NA	NA	NA	NA	NA	NA
OBP	OBP_to_OB2	Cxcl12	FALSE	0	0	162.806	-1.6838	NA	NA	NA	NA	NA	NA	NA	NA	NA
OBP	OBP_to_OB2	Cxcl14	FALSE	1.11e-16	1.3e-14	68.5557	-1.91409	NA	NA	NA	NA	NA	NA	NA	NA	NA
OBP	OBP_to_OB2	Cybrd1	FALSE	3.03e-11	2.01e-09	44.1563	2.44508	NA	NA	NA	NA	NA	NA	NA	NA	NA
OBP	OBP_to_OB2	Cyfip2	FALSE	1.84e-06	5.73e-05	22.7589	1.7129	NA	NA	NA	NA	NA	NA	NA	NA	NA
OBP	OBP_to_OB2	Cyp11a1	FALSE	0.00340671	0.0492203	8.57574	1.98713	NA	NA	NA	NA	NA	NA	NA	NA	NA
OBP	OBP_to_OB2	Cyp1b1	FALSE	1.14e-12	9.02e-11	50.5854	-1.27977	NA	NA	NA	NA	NA	NA	NA	NA	NA
OBP	OBP_to_OB2	Cyp26b1	FALSE	0	0	128.339	-2.03666	NA	NA	NA	NA	NA	NA	NA	NA	NA
OBP	OBP_to_OB2	Cyp39a1	FALSE	0.00032026	0.00611154	12.948	-1.73044	NA	NA	NA	NA	NA	NA	NA	NA	NA
OBP	OBP_to_OB2	Cyp4v3	FALSE	0.00215738	0.0330278	9.41057	-0.764697	NA	NA	NA	NA	NA	NA	NA	NA	NA
OBP	OBP_to_OB2	Cystm1	FALSE	0	0	136.627	1.87034	NA	NA	NA	NA	NA	NA	NA	NA	NA
OBP	OBP_to_OB2	Dact3	FALSE	1.55e-05	0.000397307	18.6803	-1.07479	NA	NA	NA	NA	NA	NA	NA	NA	NA
OBP	OBP_to_OB2	Dbf4	FALSE	0.000243404	0.00476143	13.4623	-0.982885	NA	NA	NA	NA	NA	NA	NA	NA	NA
OBP	OBP_to_OB2	Dbn1	FALSE	1.64e-05	0.000421309	18.5647	-0.965431	NA	NA	NA	NA	NA	NA	NA	NA	NA
OBP	OBP_to_OB2	Dclk1	FALSE	0	0	115.237	-1.73919	NA	NA	NA	NA	NA	NA	NA	NA	NA
OBP	OBP_to_OB2	Dctd	FALSE	2.31e-06	7.05e-05	22.3197	-1.06264	NA	NA	NA	NA	NA	NA	NA	NA	NA
OBP	OBP_to_OB2	Dctpp1	FALSE	4.02e-05	0.000943056	16.8631	-0.723572	NA	NA	NA	NA	NA	NA	NA	NA	NA
OBP	OBP_to_OB2	Dcxr	FALSE	0.000154044	0.00319064	14.3221	-0.653962	NA	NA	NA	NA	NA	NA	NA	NA	NA
OBP	OBP_to_OB2	Ddias	FALSE	1.54e-05	0.000397133	18.6864	-1.31738	NA	NA	NA	NA	NA	NA	NA	NA	NA
OBP	OBP_to_OB2	Ddr2	FALSE	2.76e-07	9.82e-06	26.4093	-0.665067	NA	NA	NA	NA	NA	NA	NA	NA	NA
OBP	OBP_to_OB2	Ddx11	FALSE	0.00154398	0.0245675	10.0254	-1.25465	NA	NA	NA	NA	NA	NA	NA	NA	NA
OBP	OBP_to_OB2	Ddx18	FALSE	0.000217659	0.0043276	13.6721	-0.694593	NA	NA	NA	NA	NA	NA	NA	NA	NA
OBP	OBP_to_OB2	Ddx21	FALSE	1.88e-05	0.000476136	18.3071	-0.732412	NA	NA	NA	NA	NA	NA	NA	NA	NA
OBP	OBP_to_OB2	Ddx39	FALSE	0.00151288	0.0241783	10.0629	-0.645386	NA	NA	NA	NA	NA	NA	NA	NA	NA
OBP	OBP_to_OB2	Ddx39b	FALSE	0.00101716	0.0170157	10.7961	-0.529801	NA	NA	NA	NA	NA	NA	NA	NA	NA
OBP	OBP_to_OB2	Depdc1a	FALSE	2.08e-05	0.000523147	18.1102	-1.85188	NA	NA	NA	NA	NA	NA	NA	NA	NA
OBP	OBP_to_OB2	Dglucy	FALSE	0.00199477	0.0308632	9.55434	-0.792424	NA	NA	NA	NA	NA	NA	NA	NA	NA
OBP	OBP_to_OB2	Dhfr	FALSE	3.73e-10	2.09e-08	39.2494	-1.63194	NA	NA	NA	NA	NA	NA	NA	NA	NA
OBP	OBP_to_OB2	Diaph3	FALSE	4.95e-10	2.73e-08	38.696	-1.82328	NA	NA	NA	NA	NA	NA	NA	NA	NA
OBP	OBP_to_OB2	Dimt1	FALSE	6.9e-05	0.00155047	15.8372	-0.762611	NA	NA	NA	NA	NA	NA	NA	NA	NA
OBP	OBP_to_OB2	Dis3	FALSE	8.89e-05	0.00195261	15.3588	-0.791194	NA	NA	NA	NA	NA	NA	NA	NA	NA
OBP	OBP_to_OB2	Dkc1	FALSE	1.53e-07	5.76e-06	27.5505	-0.901258	NA	NA	NA	NA	NA	NA	NA	NA	NA
OBP	OBP_to_OB2	Dkk1	FALSE	1.37e-13	1.21e-11	54.7455	2.99698	NA	NA	NA	NA	NA	NA	NA	NA	NA
OBP	OBP_to_OB2	Dlgap5	FALSE	7.96e-07	2.63e-05	24.3663	-1.80339	NA	NA	NA	NA	NA	NA	NA	NA	NA
OBP	OBP_to_OB2	Dlk2	FALSE	0.00291026	0.0429864	8.86289	-1.27611	NA	NA	NA	NA	NA	NA	NA	NA	NA
OBP	OBP_to_OB2	Dmp1	FALSE	0	0	143.881	2.11044	NA	NA	NA	NA	NA	NA	NA	NA	NA
OBP	OBP_to_OB2	Dnajb9	FALSE	8.49e-07	2.78e-05	24.2426	0.651376	NA	NA	NA	NA	NA	NA	NA	NA	NA
OBP	OBP_to_OB2	Dnajc2	FALSE	2.92e-05	0.000709674	17.4676	-0.780302	NA	NA	NA	NA	NA	NA	NA	NA	NA
OBP	OBP_to_OB2	Dnmt1	FALSE	9.89e-07	3.21e-05	23.9491	-1.0662	NA	NA	NA	NA	NA	NA	NA	NA	NA
OBP	OBP_to_OB2	Dnph1	FALSE	2.56e-09	1.25e-07	35.4959	-1.43922	NA	NA	NA	NA	NA	NA	NA	NA	NA
OBP	OBP_to_OB2	Dock9	FALSE	1.45e-06	4.61e-05	23.2095	1.51065	NA	NA	NA	NA	NA	NA	NA	NA	NA
OBP	OBP_to_OB2	Dpp6	FALSE	0.00131476	0.0212611	10.3217	1.49395	NA	NA	NA	NA	NA	NA	NA	NA	NA
OBP	OBP_to_OB2	Dpysl3	FALSE	0	0	103.74	-1.17895	NA	NA	NA	NA	NA	NA	NA	NA	NA
OBP	OBP_to_OB2	Dram1	FALSE	4.95e-07	1.69e-05	25.2835	-1.22293	NA	NA	NA	NA	NA	NA	NA	NA	NA
OBP	OBP_to_OB2	Dscc1	FALSE	4.09e-05	0.000958303	16.8307	-1.70279	NA	NA	NA	NA	NA	NA	NA	NA	NA
OBP	OBP_to_OB2	Dse	FALSE	1.55e-05	0.000397307	18.6788	-0.729285	NA	NA	NA	NA	NA	NA	NA	NA	NA
OBP	OBP_to_OB2	Dtl	FALSE	6.58e-05	0.00148215	15.927	-1.12863	NA	NA	NA	NA	NA	NA	NA	NA	NA
OBP	OBP_to_OB2	Dtna	FALSE	1.11e-16	1.3e-14	69.1615	1.67582	NA	NA	NA	NA	NA	NA	NA	NA	NA
OBP	OBP_to_OB2	Dtymk	FALSE	1e-09	5.22e-08	37.325	-0.807233	NA	NA	NA	NA	NA	NA	NA	NA	NA
OBP	OBP_to_OB2	Dusp14	FALSE	3.6e-05	0.000855491	17.0728	1.04199	NA	NA	NA	NA	NA	NA	NA	NA	NA
OBP	OBP_to_OB2	Dut	FALSE	1.11e-16	1.3e-14	69.1492	-1.30862	NA	NA	NA	NA	NA	NA	NA	NA	NA
OBP	OBP_to_OB2	Dynlt1f	FALSE	0.0026588	0.0396477	9.02797	-0.724373	NA	NA	NA	NA	NA	NA	NA	NA	NA
OBP	OBP_to_OB2	Dzip3	FALSE	0.00154995	0.0246446	10.0183	-0.729577	NA	NA	NA	NA	NA	NA	NA	NA	NA
OBP	OBP_to_OB2	E2f7	FALSE	0.000555405	0.0100118	11.9198	-1.46614	NA	NA	NA	NA	NA	NA	NA	NA	NA
OBP	OBP_to_OB2	E2f8	FALSE	2.74e-06	8.24e-05	21.9921	-1.9818	NA	NA	NA	NA	NA	NA	NA	NA	NA
OBP	OBP_to_OB2	Ebf1	FALSE	6.48e-11	4.13e-09	42.6685	-0.812809	NA	NA	NA	NA	NA	NA	NA	NA	NA
OBP	OBP_to_OB2	Ebf3	FALSE	6.68e-07	2.24e-05	24.7054	-1.26454	NA	NA	NA	NA	NA	NA	NA	NA	NA
OBP	OBP_to_OB2	Ecscr	FALSE	0.000672366	0.011771	11.5641	-1.83276	NA	NA	NA	NA	NA	NA	NA	NA	NA
OBP	OBP_to_OB2	Eda	FALSE	0.00110936	0.0183473	10.6355	-1.46744	NA	NA	NA	NA	NA	NA	NA	NA	NA
OBP	OBP_to_OB2	Eda2r	FALSE	0.000593406	0.0105839	11.7966	-0.918311	NA	NA	NA	NA	NA	NA	NA	NA	NA
OBP	OBP_to_OB2	Edem1	FALSE	0.000836642	0.0143253	11.1581	0.581272	NA	NA	NA	NA	NA	NA	NA	NA	NA
OBP	OBP_to_OB2	Edil3	FALSE	9.49e-13	7.59e-11	50.9472	-1.83007	NA	NA	NA	NA	NA	NA	NA	NA	NA
OBP	OBP_to_OB2	Edn1	FALSE	0.00318902	0.046506	8.69604	-1.81615	NA	NA	NA	NA	NA	NA	NA	NA	NA
OBP	OBP_to_OB2	Ednra	FALSE	6.28e-09	2.87e-07	33.7467	-1.75718	NA	NA	NA	NA	NA	NA	NA	NA	NA
OBP	OBP_to_OB2	Efcab1	FALSE	0.000769425	0.0132995	11.3136	-3.25661	NA	NA	NA	NA	NA	NA	NA	NA	NA
OBP	OBP_to_OB2	Efna1	FALSE	5.67e-11	3.63e-09	42.9308	1.32277	NA	NA	NA	NA	NA	NA	NA	NA	NA
OBP	OBP_to_OB2	Efna5	FALSE	0	0	112.286	-2.55522	NA	NA	NA	NA	NA	NA	NA	NA	NA
OBP	OBP_to_OB2	Efnb1	FALSE	0.000360219	0.0068086	12.728	-0.614376	NA	NA	NA	NA	NA	NA	NA	NA	NA
OBP	OBP_to_OB2	Egfl7	FALSE	0.000102934	0.00221498	15.0821	-1.2461	NA	NA	NA	NA	NA	NA	NA	NA	NA
OBP	OBP_to_OB2	Egfr	FALSE	1.79e-05	0.000456317	18.3987	-1.48377	NA	NA	NA	NA	NA	NA	NA	NA	NA
OBP	OBP_to_OB2	Egr1	FALSE	4.05e-07	1.4e-05	25.6682	-0.713048	NA	NA	NA	NA	NA	NA	NA	NA	NA
OBP	OBP_to_OB2	Egr2	FALSE	5.53e-09	2.56e-07	33.9927	-1.50096	NA	NA	NA	NA	NA	NA	NA	NA	NA
OBP	OBP_to_OB2	Egr3	FALSE	6.43e-06	0.000178236	20.3571	-0.983039	NA	NA	NA	NA	NA	NA	NA	NA	NA
OBP	OBP_to_OB2	Ehd2	FALSE	0	0	119.613	-2.12038	NA	NA	NA	NA	NA	NA	NA	NA	NA
OBP	OBP_to_OB2	Ehd3	FALSE	1.44e-10	8.74e-09	41.1129	-0.840542	NA	NA	NA	NA	NA	NA	NA	NA	NA
OBP	OBP_to_OB2	Eif2b3	FALSE	0.000475138	0.00868738	12.2108	-0.769556	NA	NA	NA	NA	NA	NA	NA	NA	NA
OBP	OBP_to_OB2	Eif2s1	FALSE	1.47e-05	0.000381817	18.7749	-0.651484	NA	NA	NA	NA	NA	NA	NA	NA	NA
OBP	OBP_to_OB2	Eif3e	FALSE	3.86e-08	1.62e-06	30.2171	-0.588177	NA	NA	NA	NA	NA	NA	NA	NA	NA
OBP	OBP_to_OB2	Eif4e3	FALSE	2.42e-05	0.000597017	17.8284	-0.886658	NA	NA	NA	NA	NA	NA	NA	NA	NA
OBP	OBP_to_OB2	Ell2	FALSE	0.00119853	0.0196434	10.4926	0.597013	NA	NA	NA	NA	NA	NA	NA	NA	NA
OBP	OBP_to_OB2	Elovl6	FALSE	0.00072841	0.012681	11.4153	-0.988252	NA	NA	NA	NA	NA	NA	NA	NA	NA
OBP	OBP_to_OB2	Emc2	FALSE	5.44e-13	4.47e-11	52.0391	-0.869988	NA	NA	NA	NA	NA	NA	NA	NA	NA
OBP	OBP_to_OB2	Emp1	FALSE	5.31e-05	0.00122114	16.3347	-0.678611	NA	NA	NA	NA	NA	NA	NA	NA	NA
OBP	OBP_to_OB2	Enah	FALSE	4e-05	0.000939677	16.872	-0.612239	NA	NA	NA	NA	NA	NA	NA	NA	NA
OBP	OBP_to_OB2	Enc1	FALSE	0.00101317	0.0169751	10.8033	-0.850421	NA	NA	NA	NA	NA	NA	NA	NA	NA
OBP	OBP_to_OB2	Enho	FALSE	0.00231708	0.0351768	9.27969	1.03872	NA	NA	NA	NA	NA	NA	NA	NA	NA
OBP	OBP_to_OB2	Enpp2	FALSE	8.92e-11	5.61e-09	42.0446	-2.00605	NA	NA	NA	NA	NA	NA	NA	NA	NA
OBP	OBP_to_OB2	Enpp4	FALSE	3.99e-06	0.00011461	21.2697	-1.06021	NA	NA	NA	NA	NA	NA	NA	NA	NA
OBP	OBP_to_OB2	Enpp6	FALSE	2.27e-06	6.95e-05	22.3511	1.37983	NA	NA	NA	NA	NA	NA	NA	NA	NA
OBP	OBP_to_OB2	Entpd3	FALSE	0	0	206.412	2.86845	NA	NA	NA	NA	NA	NA	NA	NA	NA
OBP	OBP_to_OB2	Epha3	FALSE	7.13e-06	0.00019504	20.1594	-1.52934	NA	NA	NA	NA	NA	NA	NA	NA	NA
OBP	OBP_to_OB2	Ephx1	FALSE	9.24e-11	5.79e-09	41.9765	-0.927708	NA	NA	NA	NA	NA	NA	NA	NA	NA
OBP	OBP_to_OB2	Ephx4	FALSE	0.00014206	0.00296776	14.4746	2.36613	NA	NA	NA	NA	NA	NA	NA	NA	NA
OBP	OBP_to_OB2	Ercc6l	FALSE	0.000275768	0.00532297	13.2282	-1.38985	NA	NA	NA	NA	NA	NA	NA	NA	NA
OBP	OBP_to_OB2	Ereg	FALSE	0.000258665	0.00501502	13.3482	-2.99096	NA	NA	NA	NA	NA	NA	NA	NA	NA
OBP	OBP_to_OB2	Erg28	FALSE	5.09e-05	0.00117655	16.4132	-0.704158	NA	NA	NA	NA	NA	NA	NA	NA	NA
OBP	OBP_to_OB2	Erlec1	FALSE	6.68e-06	0.000184171	20.2823	0.609922	NA	NA	NA	NA	NA	NA	NA	NA	NA
OBP	OBP_to_OB2	Erp29	FALSE	0	0	103.197	0.84185	NA	NA	NA	NA	NA	NA	NA	NA	NA
OBP	OBP_to_OB2	Esco2	FALSE	5.94e-09	2.73e-07	33.8558	-2.49547	NA	NA	NA	NA	NA	NA	NA	NA	NA
OBP	OBP_to_OB2	Esm1	FALSE	0	0	73.8953	-2.29082	NA	NA	NA	NA	NA	NA	NA	NA	NA
OBP	OBP_to_OB2	Espl1	FALSE	0.0019536	0.0303335	9.59263	-1.60007	NA	NA	NA	NA	NA	NA	NA	NA	NA
OBP	OBP_to_OB2	Etv4	FALSE	0.00337695	0.0488227	8.59172	-1.431	NA	NA	NA	NA	NA	NA	NA	NA	NA
OBP	OBP_to_OB2	Eva1a	FALSE	2.91e-07	1.03e-05	26.3094	-1.38615	NA	NA	NA	NA	NA	NA	NA	NA	NA
OBP	OBP_to_OB2	Exo1	FALSE	1.07e-05	0.000284096	19.3804	-2.27109	NA	NA	NA	NA	NA	NA	NA	NA	NA
OBP	OBP_to_OB2	Exoc4	FALSE	0.000162307	0.00334591	14.2238	-0.659899	NA	NA	NA	NA	NA	NA	NA	NA	NA
OBP	OBP_to_OB2	Exosc1	FALSE	0.000920395	0.0155882	10.9812	-0.762445	NA	NA	NA	NA	NA	NA	NA	NA	NA
OBP	OBP_to_OB2	Exosc7	FALSE	0.00185268	0.0288899	9.69006	-0.719397	NA	NA	NA	NA	NA	NA	NA	NA	NA
OBP	OBP_to_OB2	Exosc8	FALSE	3.5e-07	1.22e-05	25.9494	-0.910235	NA	NA	NA	NA	NA	NA	NA	NA	NA
OBP	OBP_to_OB2	Eya2	FALSE	8.14e-08	3.27e-06	28.7728	-1.24759	NA	NA	NA	NA	NA	NA	NA	NA	NA
OBP	OBP_to_OB2	Ezh2	FALSE	2.83e-05	0.000690331	17.5286	-0.835657	NA	NA	NA	NA	NA	NA	NA	NA	NA
OBP	OBP_to_OB2	F13a1	FALSE	7.81e-07	2.6e-05	24.4029	-1.17693	NA	NA	NA	NA	NA	NA	NA	NA	NA
OBP	OBP_to_OB2	F2r	FALSE	6.65e-14	6.02e-12	56.1689	-2.28706	NA	NA	NA	NA	NA	NA	NA	NA	NA
OBP	OBP_to_OB2	F3	FALSE	7.54e-05	0.00167584	15.6707	-1.21576	NA	NA	NA	NA	NA	NA	NA	NA	NA
OBP	OBP_to_OB2	Fabp3	FALSE	0	0	91.0061	1.22865	NA	NA	NA	NA	NA	NA	NA	NA	NA
OBP	OBP_to_OB2	Fabp4	FALSE	4.54e-07	1.56e-05	25.4483	-1.23121	NA	NA	NA	NA	NA	NA	NA	NA	NA
OBP	OBP_to_OB2	Fabp5	FALSE	0	0	75.2785	-1.3386	NA	NA	NA	NA	NA	NA	NA	NA	NA
OBP	OBP_to_OB2	Fah	FALSE	9.81e-05	0.00212594	15.1736	-0.772773	NA	NA	NA	NA	NA	NA	NA	NA	NA
OBP	OBP_to_OB2	Fam105a	FALSE	9.9e-06	0.000263871	19.5308	-1.14051	NA	NA	NA	NA	NA	NA	NA	NA	NA
OBP	OBP_to_OB2	Fam111a	FALSE	2.44e-12	1.85e-10	49.0904	-1.85215	NA	NA	NA	NA	NA	NA	NA	NA	NA
OBP	OBP_to_OB2	Fam124a	FALSE	1.43e-05	0.000373202	18.8298	-1.63872	NA	NA	NA	NA	NA	NA	NA	NA	NA
OBP	OBP_to_OB2	Fam180a	FALSE	2.73e-05	0.000667907	17.5978	-1.52916	NA	NA	NA	NA	NA	NA	NA	NA	NA
OBP	OBP_to_OB2	Fam198b	FALSE	4.62e-05	0.00107482	16.5967	-0.969861	NA	NA	NA	NA	NA	NA	NA	NA	NA
OBP	OBP_to_OB2	Fam20a	FALSE	0	0	98.9418	-2.29121	NA	NA	NA	NA	NA	NA	NA	NA	NA
OBP	OBP_to_OB2	Fam212b	FALSE	3.88e-05	0.000913284	16.9302	-1.24759	NA	NA	NA	NA	NA	NA	NA	NA	NA
OBP	OBP_to_OB2	Fam214a	FALSE	0	0	81.3341	1.30095	NA	NA	NA	NA	NA	NA	NA	NA	NA
OBP	OBP_to_OB2	Fam26e	FALSE	0.000211878	0.00422422	13.7227	-0.885484	NA	NA	NA	NA	NA	NA	NA	NA	NA
OBP	OBP_to_OB2	Fam53b	FALSE	8.53e-05	0.00188003	15.438	-0.927158	NA	NA	NA	NA	NA	NA	NA	NA	NA
OBP	OBP_to_OB2	Fam69a	FALSE	0.00011508	0.00244388	14.8716	-1.00488	NA	NA	NA	NA	NA	NA	NA	NA	NA
OBP	OBP_to_OB2	Fam69b	FALSE	8.41e-10	4.49e-08	37.6633	-1.59548	NA	NA	NA	NA	NA	NA	NA	NA	NA
OBP	OBP_to_OB2	Fam71a	FALSE	2.11e-05	0.000528986	18.0847	1.25954	NA	NA	NA	NA	NA	NA	NA	NA	NA
OBP	OBP_to_OB2	Fam78b	FALSE	4.58e-08	1.91e-06	29.8887	1.47191	NA	NA	NA	NA	NA	NA	NA	NA	NA
OBP	OBP_to_OB2	Fam83d	FALSE	0.00132803	0.0214123	10.3031	-1.14246	NA	NA	NA	NA	NA	NA	NA	NA	NA
OBP	OBP_to_OB2	Fancd2	FALSE	0.00170576	0.0268096	9.84195	-1.2585	NA	NA	NA	NA	NA	NA	NA	NA	NA
OBP	OBP_to_OB2	Fanci	FALSE	2.13e-05	0.000532528	18.0676	-2.78096	NA	NA	NA	NA	NA	NA	NA	NA	NA
OBP	OBP_to_OB2	Fat1	FALSE	8.05e-09	3.65e-07	33.2631	-0.637539	NA	NA	NA	NA	NA	NA	NA	NA	NA
OBP	OBP_to_OB2	Fat3	FALSE	0.000707359	0.0123539	11.4698	-0.749393	NA	NA	NA	NA	NA	NA	NA	NA	NA
OBP	OBP_to_OB2	Fbl	FALSE	9.1e-05	0.00199333	15.3141	-0.653627	NA	NA	NA	NA	NA	NA	NA	NA	NA
OBP	OBP_to_OB2	Fblim1	FALSE	0.000108602	0.00231986	14.9809	-1.00112	NA	NA	NA	NA	NA	NA	NA	NA	NA
OBP	OBP_to_OB2	Fbln5	FALSE	0	0	269.181	-2.12905	NA	NA	NA	NA	NA	NA	NA	NA	NA
OBP	OBP_to_OB2	Fbn1	FALSE	1.42e-12	1.11e-10	50.1621	-1.35171	NA	NA	NA	NA	NA	NA	NA	NA	NA
OBP	OBP_to_OB2	Fbxo5	FALSE	1.11e-09	5.71e-08	37.1287	-2.48136	NA	NA	NA	NA	NA	NA	NA	NA	NA
OBP	OBP_to_OB2	Fbxw17	FALSE	0.000170071	0.00348622	14.1359	-0.999855	NA	NA	NA	NA	NA	NA	NA	NA	NA
OBP	OBP_to_OB2	Fetub	FALSE	5.83e-07	1.98e-05	24.9672	2.75702	NA	NA	NA	NA	NA	NA	NA	NA	NA
OBP	OBP_to_OB2	Fgf21	FALSE	0.000135318	0.00284873	14.5662	1.76068	NA	NA	NA	NA	NA	NA	NA	NA	NA
OBP	OBP_to_OB2	Fgfr2	FALSE	0	0	70.6506	-0.914896	NA	NA	NA	NA	NA	NA	NA	NA	NA
OBP	OBP_to_OB2	Fgfr3	FALSE	1.07e-08	4.77e-07	32.7134	-1.04073	NA	NA	NA	NA	NA	NA	NA	NA	NA
OBP	OBP_to_OB2	Fh1	FALSE	9.4e-08	3.68e-06	28.4942	-0.797557	NA	NA	NA	NA	NA	NA	NA	NA	NA
OBP	OBP_to_OB2	Fhl1	FALSE	0	0	109.745	-1.72335	NA	NA	NA	NA	NA	NA	NA	NA	NA
OBP	OBP_to_OB2	Fhl2	FALSE	0	0	89.4064	-1.27506	NA	NA	NA	NA	NA	NA	NA	NA	NA
OBP	OBP_to_OB2	Fibin	FALSE	0	0	71.7947	1.67235	NA	NA	NA	NA	NA	NA	NA	NA	NA
OBP	OBP_to_OB2	Fignl1	FALSE	3.84e-05	0.000905807	16.9478	-1.47435	NA	NA	NA	NA	NA	NA	NA	NA	NA
OBP	OBP_to_OB2	Fkbp10	FALSE	1.48e-12	1.16e-10	50.0702	0.706084	NA	NA	NA	NA	NA	NA	NA	NA	NA
OBP	OBP_to_OB2	Fkbp11	FALSE	0	0	130.348	1.0746	NA	NA	NA	NA	NA	NA	NA	NA	NA
OBP	OBP_to_OB2	Fkbp1a	FALSE	0.000159506	0.0032944	14.2565	-0.512703	NA	NA	NA	NA	NA	NA	NA	NA	NA
OBP	OBP_to_OB2	Fkbp5	FALSE	0.00233454	0.0353681	9.26594	-0.603408	NA	NA	NA	NA	NA	NA	NA	NA	NA
OBP	OBP_to_OB2	Fkbp7	FALSE	0	0	114.744	0.97757	NA	NA	NA	NA	NA	NA	NA	NA	NA
OBP	OBP_to_OB2	Fkbp9	FALSE	4.59e-06	0.00013068	21.0007	0.573849	NA	NA	NA	NA	NA	NA	NA	NA	NA
OBP	OBP_to_OB2	Flna	FALSE	0	0	135.044	-1.17029	NA	NA	NA	NA	NA	NA	NA	NA	NA
OBP	OBP_to_OB2	Flnb	FALSE	2.23e-09	1.1e-07	35.7642	-1.00085	NA	NA	NA	NA	NA	NA	NA	NA	NA
OBP	OBP_to_OB2	Flvcr2	FALSE	9.21e-09	4.14e-07	33.0022	1.70414	NA	NA	NA	NA	NA	NA	NA	NA	NA
OBP	OBP_to_OB2	Fmo1	FALSE	9.21e-08	3.64e-06	28.5326	-1.56728	NA	NA	NA	NA	NA	NA	NA	NA	NA
OBP	OBP_to_OB2	Fmod	FALSE	6.07e-09	2.79e-07	33.8112	-0.980357	NA	NA	NA	NA	NA	NA	NA	NA	NA
OBP	OBP_to_OB2	Fn1	FALSE	0.00226418	0.0344456	9.322	-0.549449	NA	NA	NA	NA	NA	NA	NA	NA	NA
OBP	OBP_to_OB2	Fndc1	FALSE	8.53e-06	0.000230294	19.8143	-1.29645	NA	NA	NA	NA	NA	NA	NA	NA	NA
OBP	OBP_to_OB2	Fosl1	FALSE	3.76e-05	0.000890538	16.9883	-0.997911	NA	NA	NA	NA	NA	NA	NA	NA	NA
OBP	OBP_to_OB2	Foxf2	FALSE	0.0024616	0.0370615	9.16892	-1.48622	NA	NA	NA	NA	NA	NA	NA	NA	NA
OBP	OBP_to_OB2	Foxm1	FALSE	5.48e-09	2.55e-07	34.0093	-1.97619	NA	NA	NA	NA	NA	NA	NA	NA	NA
OBP	OBP_to_OB2	Foxp1	FALSE	0.000388577	0.00728157	12.5863	-0.655177	NA	NA	NA	NA	NA	NA	NA	NA	NA
OBP	OBP_to_OB2	Frmd4a	FALSE	0.000809043	0.0139292	11.2204	-0.67921	NA	NA	NA	NA	NA	NA	NA	NA	NA
OBP	OBP_to_OB2	Frmd4b	FALSE	0.000298373	0.00571385	13.0806	1.3224	NA	NA	NA	NA	NA	NA	NA	NA	NA
OBP	OBP_to_OB2	Frrs1	FALSE	5.12e-11	3.31e-09	43.1297	-1.18879	NA	NA	NA	NA	NA	NA	NA	NA	NA
OBP	OBP_to_OB2	Frzb	FALSE	6.21e-07	2.1e-05	24.8463	1.46279	NA	NA	NA	NA	NA	NA	NA	NA	NA
OBP	OBP_to_OB2	Fst	FALSE	0	0	167.985	-1.45756	NA	NA	NA	NA	NA	NA	NA	NA	NA
OBP	OBP_to_OB2	Fstl1	FALSE	0	0	319.789	-1.80828	NA	NA	NA	NA	NA	NA	NA	NA	NA
OBP	OBP_to_OB2	Ftsj3	FALSE	0.00237581	0.0359433	9.23386	-0.695784	NA	NA	NA	NA	NA	NA	NA	NA	NA
OBP	OBP_to_OB2	Fxyd1	FALSE	3.15e-09	1.52e-07	35.0862	0.746247	NA	NA	NA	NA	NA	NA	NA	NA	NA
OBP	OBP_to_OB2	Fyn	FALSE	0	0	310.744	1.97452	NA	NA	NA	NA	NA	NA	NA	NA	NA
OBP	OBP_to_OB2	Fzd1	FALSE	0.000868381	0.0148222	11.0891	-0.776371	NA	NA	NA	NA	NA	NA	NA	NA	NA
OBP	OBP_to_OB2	Fzd5	FALSE	2.58e-11	1.74e-09	44.4687	-0.871245	NA	NA	NA	NA	NA	NA	NA	NA	NA
OBP	OBP_to_OB2	G3bp1	FALSE	0.00015389	0.00319047	14.324	-0.582073	NA	NA	NA	NA	NA	NA	NA	NA	NA
OBP	OBP_to_OB2	Gal	FALSE	0	0	167.287	2.77255	NA	NA	NA	NA	NA	NA	NA	NA	NA
OBP	OBP_to_OB2	Galnt5	FALSE	6.25e-10	3.42e-08	38.243	2.40027	NA	NA	NA	NA	NA	NA	NA	NA	NA
OBP	OBP_to_OB2	Galr2	FALSE	0.00121415	0.0198264	10.4687	-1.59058	NA	NA	NA	NA	NA	NA	NA	NA	NA
OBP	OBP_to_OB2	Garem1	FALSE	0.00332447	0.0481596	8.62024	0.753137	NA	NA	NA	NA	NA	NA	NA	NA	NA
OBP	OBP_to_OB2	Gars	FALSE	0.00115641	0.019039	10.5587	0.533919	NA	NA	NA	NA	NA	NA	NA	NA	NA
OBP	OBP_to_OB2	Gart	FALSE	1.49e-05	0.000386663	18.7441	-0.90113	NA	NA	NA	NA	NA	NA	NA	NA	NA
OBP	OBP_to_OB2	Gas6	FALSE	0	0	177.857	-1.49913	NA	NA	NA	NA	NA	NA	NA	NA	NA
OBP	OBP_to_OB2	Gatb	FALSE	0.000216737	0.0043132	13.6801	-1.09935	NA	NA	NA	NA	NA	NA	NA	NA	NA
OBP	OBP_to_OB2	Gchfr	FALSE	4.63e-09	2.18e-07	34.3386	1.59957	NA	NA	NA	NA	NA	NA	NA	NA	NA
OBP	OBP_to_OB2	Gcnt1	FALSE	4.27e-10	2.38e-08	38.9854	1.07588	NA	NA	NA	NA	NA	NA	NA	NA	NA
OBP	OBP_to_OB2	Gcnt4	FALSE	0.000671677	0.0117684	11.566	-1.3514	NA	NA	NA	NA	NA	NA	NA	NA	NA
OBP	OBP_to_OB2	Gcsh	FALSE	1.17e-07	4.52e-06	28.0623	-0.880451	NA	NA	NA	NA	NA	NA	NA	NA	NA
OBP	OBP_to_OB2	Gdf10	FALSE	0.00301192	0.0442187	8.80023	-2.04686	NA	NA	NA	NA	NA	NA	NA	NA	NA
OBP	OBP_to_OB2	Gdf5	FALSE	0.00121299	0.0198264	10.4705	1.64491	NA	NA	NA	NA	NA	NA	NA	NA	NA
OBP	OBP_to_OB2	Gdf6	FALSE	0.00241729	0.0364698	9.20217	-1.90413	NA	NA	NA	NA	NA	NA	NA	NA	NA
OBP	OBP_to_OB2	Gdpd1	FALSE	0.0027286	0.0406053	8.98061	0.998052	NA	NA	NA	NA	NA	NA	NA	NA	NA
OBP	OBP_to_OB2	Gemin6	FALSE	3.24e-06	9.57e-05	21.6689	-1.14928	NA	NA	NA	NA	NA	NA	NA	NA	NA
OBP	OBP_to_OB2	Gen1	FALSE	0.000599392	0.0106819	11.7779	-1.4008	NA	NA	NA	NA	NA	NA	NA	NA	NA
OBP	OBP_to_OB2	Ggt5	FALSE	1.55e-08	6.8e-07	31.9915	-1.91523	NA	NA	NA	NA	NA	NA	NA	NA	NA
OBP	OBP_to_OB2	Ggta1	FALSE	0.000500806	0.00911092	12.1127	-1.08571	NA	NA	NA	NA	NA	NA	NA	NA	NA
OBP	OBP_to_OB2	Gins2	FALSE	2.72e-09	1.33e-07	35.3735	-1.41552	NA	NA	NA	NA	NA	NA	NA	NA	NA
OBP	OBP_to_OB2	Gjc1	FALSE	1.37e-11	9.56e-10	45.7174	-1.65535	NA	NA	NA	NA	NA	NA	NA	NA	NA
OBP	OBP_to_OB2	Gldn	FALSE	0.000968852	0.0163328	10.8862	-2.18661	NA	NA	NA	NA	NA	NA	NA	NA	NA
OBP	OBP_to_OB2	Glg1	FALSE	0.000961524	0.0162218	10.9002	0.54807	NA	NA	NA	NA	NA	NA	NA	NA	NA
OBP	OBP_to_OB2	Gli3	FALSE	2.58e-05	0.000634245	17.7047	-0.894438	NA	NA	NA	NA	NA	NA	NA	NA	NA
OBP	OBP_to_OB2	Glipr1	FALSE	8.32e-05	0.00183679	15.4839	-0.865986	NA	NA	NA	NA	NA	NA	NA	NA	NA
OBP	OBP_to_OB2	Glipr2	FALSE	1.1e-11	7.8e-10	46.1461	-1.62261	NA	NA	NA	NA	NA	NA	NA	NA	NA
OBP	OBP_to_OB2	Glis3	FALSE	4.2e-07	1.45e-05	25.5996	-0.996264	NA	NA	NA	NA	NA	NA	NA	NA	NA
OBP	OBP_to_OB2	Gm10320	FALSE	0.00027295	0.00527326	13.2475	1.10389	NA	NA	NA	NA	NA	NA	NA	NA	NA
OBP	OBP_to_OB2	Gm12185	FALSE	6.18e-05	0.00139751	16.0475	-2.22661	NA	NA	NA	NA	NA	NA	NA	NA	NA
OBP	OBP_to_OB2	Gm13411	FALSE	7.72e-05	0.00170884	15.6261	-3.76436	NA	NA	NA	NA	NA	NA	NA	NA	NA
OBP	OBP_to_OB2	Gm14002	FALSE	0.000111501	0.00237482	14.9312	-2.44996	NA	NA	NA	NA	NA	NA	NA	NA	NA
OBP	OBP_to_OB2	Gm14005	FALSE	9.64e-05	0.00209367	15.2063	0.905537	NA	NA	NA	NA	NA	NA	NA	NA	NA
OBP	OBP_to_OB2	Gm16118	FALSE	9.83e-05	0.00212712	15.1688	1.4542	NA	NA	NA	NA	NA	NA	NA	NA	NA
OBP	OBP_to_OB2	Gm16365	FALSE	0.00104702	0.0174219	10.7425	-1.37605	NA	NA	NA	NA	NA	NA	NA	NA	NA
OBP	OBP_to_OB2	Gm16685	FALSE	0.00254389	0.0380902	9.10876	-1.37113	NA	NA	NA	NA	NA	NA	NA	NA	NA
OBP	OBP_to_OB2	Gm1673	FALSE	1.11e-16	1.3e-14	69.5762	-1.35347	NA	NA	NA	NA	NA	NA	NA	NA	NA
OBP	OBP_to_OB2	Gm19705	FALSE	0	0	109.414	2.23704	NA	NA	NA	NA	NA	NA	NA	NA	NA
OBP	OBP_to_OB2	Gm20478	FALSE	0.00120327	0.0197064	10.4853	0.985614	NA	NA	NA	NA	NA	NA	NA	NA	NA
OBP	OBP_to_OB2	Gm2115	FALSE	1.38e-05	0.00036231	18.8955	-2.38651	NA	NA	NA	NA	NA	NA	NA	NA	NA
OBP	OBP_to_OB2	Gm26532	FALSE	0.00108488	0.0179697	10.6768	0.740816	NA	NA	NA	NA	NA	NA	NA	NA	NA
OBP	OBP_to_OB2	Gm266	FALSE	5.72e-10	3.14e-08	38.4139	1.34253	NA	NA	NA	NA	NA	NA	NA	NA	NA
OBP	OBP_to_OB2	Gm26778	FALSE	0.000219589	0.00436202	13.6556	-1.85163	NA	NA	NA	NA	NA	NA	NA	NA	NA
OBP	OBP_to_OB2	Gm26802	FALSE	0.00267268	0.0398275	9.01845	0.913932	NA	NA	NA	NA	NA	NA	NA	NA	NA
OBP	OBP_to_OB2	Gm28723	FALSE	2.7e-08	1.15e-06	30.9097	1.41421	NA	NA	NA	NA	NA	NA	NA	NA	NA
OBP	OBP_to_OB2	Gm32618	FALSE	0.000831874	0.0142548	11.1687	-1.39526	NA	NA	NA	NA	NA	NA	NA	NA	NA
OBP	OBP_to_OB2	Gm35024	FALSE	0.00161276	0.0254578	9.94513	-3.34134	NA	NA	NA	NA	NA	NA	NA	NA	NA
OBP	OBP_to_OB2	Gm37800	FALSE	0.00018648	0.0037835	13.9626	-2.50986	NA	NA	NA	NA	NA	NA	NA	NA	NA
OBP	OBP_to_OB2	Gm40578	FALSE	0.00247493	0.0371853	9.15904	1.66792	NA	NA	NA	NA	NA	NA	NA	NA	NA
OBP	OBP_to_OB2	Gm4117	FALSE	0.000578981	0.0103689	11.8424	-1.10339	NA	NA	NA	NA	NA	NA	NA	NA	NA
OBP	OBP_to_OB2	Gm42788	FALSE	0.000158839	0.00328373	14.2644	1.59943	NA	NA	NA	NA	NA	NA	NA	NA	NA
OBP	OBP_to_OB2	Gm567	FALSE	1.29e-07	4.91e-06	27.882	2.81033	NA	NA	NA	NA	NA	NA	NA	NA	NA
OBP	OBP_to_OB2	Gm6634	FALSE	0.000207866	0.00415179	13.7586	-2.50289	NA	NA	NA	NA	NA	NA	NA	NA	NA
OBP	OBP_to_OB2	Gmnn	FALSE	8.24e-08	3.3e-06	28.7481	-1.39645	NA	NA	NA	NA	NA	NA	NA	NA	NA
OBP	OBP_to_OB2	Gnb4	FALSE	2.55e-13	2.17e-11	53.5263	-1.90822	NA	NA	NA	NA	NA	NA	NA	NA	NA
OBP	OBP_to_OB2	Gng5	FALSE	3.08e-07	1.08e-05	26.2017	0.555278	NA	NA	NA	NA	NA	NA	NA	NA	NA
OBP	OBP_to_OB2	Gng8	FALSE	0.000207295	0.00414419	13.7638	-1.39929	NA	NA	NA	NA	NA	NA	NA	NA	NA
OBP	OBP_to_OB2	Gnptab	FALSE	0.00116732	0.0191896	10.5414	-0.892691	NA	NA	NA	NA	NA	NA	NA	NA	NA
OBP	OBP_to_OB2	Got2	FALSE	0.0015542	0.0246941	10.0132	-0.598821	NA	NA	NA	NA	NA	NA	NA	NA	NA
OBP	OBP_to_OB2	Gpatch4	FALSE	3.19e-06	9.49e-05	21.6958	-1.02085	NA	NA	NA	NA	NA	NA	NA	NA	NA
OBP	OBP_to_OB2	Gpcpd1	FALSE	0.00115266	0.0190203	10.5647	0.661477	NA	NA	NA	NA	NA	NA	NA	NA	NA
OBP	OBP_to_OB2	Gpm6b	FALSE	4.25e-07	1.46e-05	25.5756	-1.69346	NA	NA	NA	NA	NA	NA	NA	NA	NA
OBP	OBP_to_OB2	Gpr161	FALSE	0.000742557	0.0128861	11.3796	-1.47879	NA	NA	NA	NA	NA	NA	NA	NA	NA
OBP	OBP_to_OB2	Gpr176	FALSE	1.11e-13	9.85e-12	55.1608	-1.8575	NA	NA	NA	NA	NA	NA	NA	NA	NA
OBP	OBP_to_OB2	Gprc5c	FALSE	7.4e-06	0.000202001	20.0863	0.683405	NA	NA	NA	NA	NA	NA	NA	NA	NA
OBP	OBP_to_OB2	Grb14	FALSE	1.11e-16	1.3e-14	70.1236	-1.23754	NA	NA	NA	NA	NA	NA	NA	NA	NA
OBP	OBP_to_OB2	Grem1	FALSE	9.71e-10	5.08e-08	37.3819	-1.80478	NA	NA	NA	NA	NA	NA	NA	NA	NA
OBP	OBP_to_OB2	Grem2	FALSE	2.65e-06	7.99e-05	22.0537	-2.0744	NA	NA	NA	NA	NA	NA	NA	NA	NA
OBP	OBP_to_OB2	Grhpr	FALSE	0.00222357	0.0338749	9.35518	0.546204	NA	NA	NA	NA	NA	NA	NA	NA	NA
OBP	OBP_to_OB2	Gria3	FALSE	1e-06	3.24e-05	23.9284	-0.93622	NA	NA	NA	NA	NA	NA	NA	NA	NA
OBP	OBP_to_OB2	Grrp1	FALSE	2.05e-12	1.58e-10	49.4363	1.96911	NA	NA	NA	NA	NA	NA	NA	NA	NA
OBP	OBP_to_OB2	Gsg1l	FALSE	0.000366181	0.00690933	12.6973	1.26125	NA	NA	NA	NA	NA	NA	NA	NA	NA
OBP	OBP_to_OB2	Gsta4	FALSE	7e-05	0.00157135	15.8099	-1.13987	NA	NA	NA	NA	NA	NA	NA	NA	NA
OBP	OBP_to_OB2	Gstt1	FALSE	0.000651465	0.0114695	11.6228	-1.63955	NA	NA	NA	NA	NA	NA	NA	NA	NA
OBP	OBP_to_OB2	Gtf2h2	FALSE	0.00259529	0.0387802	9.07217	-0.779744	NA	NA	NA	NA	NA	NA	NA	NA	NA
OBP	OBP_to_OB2	Gtpbp4	FALSE	1.05e-07	4.07e-06	28.2859	-0.776584	NA	NA	NA	NA	NA	NA	NA	NA	NA
OBP	OBP_to_OB2	Gtpbp8	FALSE	0.00127038	0.0206045	10.3851	-0.785371	NA	NA	NA	NA	NA	NA	NA	NA	NA
OBP	OBP_to_OB2	Gtse1	FALSE	8.25e-07	2.71e-05	24.2983	-1.35307	NA	NA	NA	NA	NA	NA	NA	NA	NA
OBP	OBP_to_OB2	Gulp1	FALSE	3.29e-05	0.000787298	17.2431	-1.21104	NA	NA	NA	NA	NA	NA	NA	NA	NA
OBP	OBP_to_OB2	Gxylt2	FALSE	7.51e-05	0.00167338	15.6773	0.67337	NA	NA	NA	NA	NA	NA	NA	NA	NA
OBP	OBP_to_OB2	Gypc	FALSE	0.0019944	0.0308632	9.55468	-0.870853	NA	NA	NA	NA	NA	NA	NA	NA	NA
OBP	OBP_to_OB2	Gzmc	FALSE	0.0023107	0.0351287	9.28475	-1.58785	NA	NA	NA	NA	NA	NA	NA	NA	NA
OBP	OBP_to_OB2	Gzme	FALSE	2.1e-08	9.03e-07	31.3989	-1.75247	NA	NA	NA	NA	NA	NA	NA	NA	NA
OBP	OBP_to_OB2	H19	FALSE	7.5e-13	6.04e-11	51.408	-2.20489	NA	NA	NA	NA	NA	NA	NA	NA	NA
OBP	OBP_to_OB2	H1fx	FALSE	0.000871426	0.0148626	11.0826	-0.803717	NA	NA	NA	NA	NA	NA	NA	NA	NA
OBP	OBP_to_OB2	H2-Q10	FALSE	7.13e-06	0.00019504	20.1582	1.29119	NA	NA	NA	NA	NA	NA	NA	NA	NA
OBP	OBP_to_OB2	H2afv	FALSE	0.000380966	0.00715738	12.6233	-0.638292	NA	NA	NA	NA	NA	NA	NA	NA	NA
OBP	OBP_to_OB2	H2afx	FALSE	9.11e-08	3.6e-06	28.5544	-0.948094	NA	NA	NA	NA	NA	NA	NA	NA	NA
OBP	OBP_to_OB2	Hacd4	FALSE	0.00191685	0.0298266	9.62751	-0.939752	NA	NA	NA	NA	NA	NA	NA	NA	NA
OBP	OBP_to_OB2	Has2	FALSE	2.63e-14	2.42e-12	57.9924	-2.04204	NA	NA	NA	NA	NA	NA	NA	NA	NA
OBP	OBP_to_OB2	Haspin	FALSE	0.000830526	0.0142429	11.1717	-1.66052	NA	NA	NA	NA	NA	NA	NA	NA	NA
OBP	OBP_to_OB2	Hat1	FALSE	3.16e-08	1.34e-06	30.6054	-1.05701	NA	NA	NA	NA	NA	NA	NA	NA	NA
OBP	OBP_to_OB2	Haus4	FALSE	9.71e-07	3.16e-05	23.9844	-1.26632	NA	NA	NA	NA	NA	NA	NA	NA	NA
OBP	OBP_to_OB2	Haus8	FALSE	2.39e-05	0.000592026	17.8487	-0.859854	NA	NA	NA	NA	NA	NA	NA	NA	NA
OBP	OBP_to_OB2	Hdac1	FALSE	7.53e-05	0.00167584	15.6723	-0.694992	NA	NA	NA	NA	NA	NA	NA	NA	NA
OBP	OBP_to_OB2	Hdgf	FALSE	3.23e-06	9.56e-05	21.6743	-0.611364	NA	NA	NA	NA	NA	NA	NA	NA	NA
OBP	OBP_to_OB2	Hdgfl3	FALSE	1.04e-06	3.37e-05	23.8495	-1.12459	NA	NA	NA	NA	NA	NA	NA	NA	NA
OBP	OBP_to_OB2	Heg1	FALSE	0.00077707	0.0133999	11.2952	0.738527	NA	NA	NA	NA	NA	NA	NA	NA	NA
OBP	OBP_to_OB2	Hells	FALSE	8.14e-11	5.13e-09	42.2245	-1.65918	NA	NA	NA	NA	NA	NA	NA	NA	NA
OBP	OBP_to_OB2	Hid1	FALSE	9.14e-09	4.12e-07	33.0163	1.89501	NA	NA	NA	NA	NA	NA	NA	NA	NA
OBP	OBP_to_OB2	Higd1a	FALSE	0	0	130.526	1.11558	NA	NA	NA	NA	NA	NA	NA	NA	NA
OBP	OBP_to_OB2	Hirip3	FALSE	1.56e-08	6.83e-07	31.9802	-1.39149	NA	NA	NA	NA	NA	NA	NA	NA	NA
OBP	OBP_to_OB2	Hist1h1b	FALSE	1.06e-06	3.43e-05	23.8082	-1.60511	NA	NA	NA	NA	NA	NA	NA	NA	NA
OBP	OBP_to_OB2	Hist1h2ak	FALSE	0.000407421	0.00757617	12.4978	-2.36572	NA	NA	NA	NA	NA	NA	NA	NA	NA
OBP	OBP_to_OB2	Hist1h2ap	FALSE	9.59e-06	0.000256775	19.5922	-1.42946	NA	NA	NA	NA	NA	NA	NA	NA	NA
OBP	OBP_to_OB2	Hist1h2bc	FALSE	6.67e-06	0.000184096	20.2855	0.724179	NA	NA	NA	NA	NA	NA	NA	NA	NA
OBP	OBP_to_OB2	Hjurp	FALSE	0.00100362	0.0168523	10.8209	-0.744242	NA	NA	NA	NA	NA	NA	NA	NA	NA
OBP	OBP_to_OB2	Hmgb2	FALSE	0	0	135.425	-1.93423	NA	NA	NA	NA	NA	NA	NA	NA	NA
OBP	OBP_to_OB2	Hmgb3	FALSE	0.00070058	0.0122453	11.4877	-0.843729	NA	NA	NA	NA	NA	NA	NA	NA	NA
OBP	OBP_to_OB2	Hmgn2	FALSE	1.53e-06	4.86e-05	23.1038	-0.889468	NA	NA	NA	NA	NA	NA	NA	NA	NA
OBP	OBP_to_OB2	Hmmr	FALSE	2.51e-06	7.62e-05	22.1554	-1.85224	NA	NA	NA	NA	NA	NA	NA	NA	NA
OBP	OBP_to_OB2	Hnmt	FALSE	1.79e-05	0.000456317	18.3955	-1.41157	NA	NA	NA	NA	NA	NA	NA	NA	NA
OBP	OBP_to_OB2	Hnrnpa1	FALSE	1.66e-07	6.2e-06	27.3977	-0.638599	NA	NA	NA	NA	NA	NA	NA	NA	NA
OBP	OBP_to_OB2	Hnrnpa3	FALSE	0.000317635	0.00606675	12.9634	-0.550515	NA	NA	NA	NA	NA	NA	NA	NA	NA
OBP	OBP_to_OB2	Hnrnpd	FALSE	2.05e-05	0.000515786	18.1394	-0.674772	NA	NA	NA	NA	NA	NA	NA	NA	NA
OBP	OBP_to_OB2	Hnrnpf	FALSE	0.000204935	0.00410453	13.7853	-0.526065	NA	NA	NA	NA	NA	NA	NA	NA	NA
OBP	OBP_to_OB2	Homer2	FALSE	3.02e-07	1.06e-05	26.235	1.27525	NA	NA	NA	NA	NA	NA	NA	NA	NA
OBP	OBP_to_OB2	Homer3	FALSE	0.00102797	0.0171703	10.7765	-0.846663	NA	NA	NA	NA	NA	NA	NA	NA	NA
OBP	OBP_to_OB2	Hotairm1	FALSE	1.28e-07	4.87e-06	27.9013	0.835445	NA	NA	NA	NA	NA	NA	NA	NA	NA
OBP	OBP_to_OB2	Hoxd1	FALSE	0.00155766	0.0247311	10.0091	1.09277	NA	NA	NA	NA	NA	NA	NA	NA	NA
OBP	OBP_to_OB2	Hp	FALSE	1.07e-11	7.64e-10	46.1936	-1.3569	NA	NA	NA	NA	NA	NA	NA	NA	NA
OBP	OBP_to_OB2	Hr	FALSE	0.0020304	0.0313255	9.52185	0.918113	NA	NA	NA	NA	NA	NA	NA	NA	NA
OBP	OBP_to_OB2	Hrc	FALSE	3.81e-07	1.32e-05	25.7896	2.40193	NA	NA	NA	NA	NA	NA	NA	NA	NA
OBP	OBP_to_OB2	Hrct1	FALSE	2.63e-05	0.000643905	17.6717	-1.50026	NA	NA	NA	NA	NA	NA	NA	NA	NA
OBP	OBP_to_OB2	Hs3st6	FALSE	0.00216625	0.0331404	9.40305	1.09391	NA	NA	NA	NA	NA	NA	NA	NA	NA
OBP	OBP_to_OB2	Hs6st2	FALSE	0.000400556	0.00745485	12.5296	-1.39731	NA	NA	NA	NA	NA	NA	NA	NA	NA
OBP	OBP_to_OB2	Hsd17b11	FALSE	0.000179049	0.00365309	14.0391	-0.871759	NA	NA	NA	NA	NA	NA	NA	NA	NA
OBP	OBP_to_OB2	Hspb1	FALSE	1.36e-13	1.2e-11	54.7659	-1.38494	NA	NA	NA	NA	NA	NA	NA	NA	NA
OBP	OBP_to_OB2	Hspb2	FALSE	0.000103789	0.00222576	15.0665	0.856298	NA	NA	NA	NA	NA	NA	NA	NA	NA
OBP	OBP_to_OB2	Hspd1	FALSE	0	0	96.2646	-1.021	NA	NA	NA	NA	NA	NA	NA	NA	NA
OBP	OBP_to_OB2	Hspe1	FALSE	3.18e-10	1.82e-08	39.5594	-0.664437	NA	NA	NA	NA	NA	NA	NA	NA	NA
OBP	OBP_to_OB2	Ibsp	FALSE	2.36e-12	1.8e-10	49.1589	0.867034	NA	NA	NA	NA	NA	NA	NA	NA	NA
OBP	OBP_to_OB2	Id4	FALSE	0	0	86.1417	-1.6336	NA	NA	NA	NA	NA	NA	NA	NA	NA
OBP	OBP_to_OB2	Ifi202b	FALSE	0.0015273	0.0243376	10.0454	-0.756268	NA	NA	NA	NA	NA	NA	NA	NA	NA
OBP	OBP_to_OB2	Ifi204	FALSE	2.12e-07	7.76e-06	26.9181	-1.16972	NA	NA	NA	NA	NA	NA	NA	NA	NA
OBP	OBP_to_OB2	Ifi27	FALSE	3.82e-05	0.000902642	16.9565	-0.625045	NA	NA	NA	NA	NA	NA	NA	NA	NA
OBP	OBP_to_OB2	Ifi47	FALSE	0.00042379	0.00783384	12.4243	-1.50144	NA	NA	NA	NA	NA	NA	NA	NA	NA
OBP	OBP_to_OB2	Ifitm3	FALSE	0	0	126.093	-1.06573	NA	NA	NA	NA	NA	NA	NA	NA	NA
OBP	OBP_to_OB2	Ifitm5	FALSE	0	0	197.673	1.59837	NA	NA	NA	NA	NA	NA	NA	NA	NA
OBP	OBP_to_OB2	Ift20	FALSE	8.08e-05	0.00178595	15.5389	0.568504	NA	NA	NA	NA	NA	NA	NA	NA	NA
OBP	OBP_to_OB2	Ift74	FALSE	0.00128446	0.020802	10.3647	-0.706656	NA	NA	NA	NA	NA	NA	NA	NA	NA
OBP	OBP_to_OB2	Igfbp2	FALSE	0.000233314	0.00459286	13.5418	-1.89167	NA	NA	NA	NA	NA	NA	NA	NA	NA
OBP	OBP_to_OB2	Igfbp4	FALSE	0	0	260.124	-1.7229	NA	NA	NA	NA	NA	NA	NA	NA	NA
OBP	OBP_to_OB2	Igfbp5	FALSE	0	0	92.9105	-2.78202	NA	NA	NA	NA	NA	NA	NA	NA	NA
OBP	OBP_to_OB2	Igfbp7	FALSE	0	0	98.0434	-1.07889	NA	NA	NA	NA	NA	NA	NA	NA	NA
OBP	OBP_to_OB2	Igsf10	FALSE	3.46e-12	2.6e-10	48.409	-2.08567	NA	NA	NA	NA	NA	NA	NA	NA	NA
OBP	OBP_to_OB2	Il1rn	FALSE	2.49e-09	1.22e-07	35.5447	-1.44097	NA	NA	NA	NA	NA	NA	NA	NA	NA
OBP	OBP_to_OB2	Il6	FALSE	0.000626741	0.0111148	11.6948	-1.0791	NA	NA	NA	NA	NA	NA	NA	NA	NA
OBP	OBP_to_OB2	Ilf3	FALSE	0.00342016	0.0493493	8.56857	-0.612811	NA	NA	NA	NA	NA	NA	NA	NA	NA
OBP	OBP_to_OB2	Impdh2	FALSE	6.77e-15	6.6e-13	60.6736	-0.891426	NA	NA	NA	NA	NA	NA	NA	NA	NA
OBP	OBP_to_OB2	Inafm2	FALSE	1.96e-05	0.000494646	18.2279	0.708322	NA	NA	NA	NA	NA	NA	NA	NA	NA
OBP	OBP_to_OB2	Incenp	FALSE	5.77e-09	2.66e-07	33.9124	-1.44805	NA	NA	NA	NA	NA	NA	NA	NA	NA
OBP	OBP_to_OB2	Inhba	FALSE	0	0	117.258	-1.852	NA	NA	NA	NA	NA	NA	NA	NA	NA
OBP	OBP_to_OB2	Inhbb	FALSE	2.41e-08	1.03e-06	31.131	-1.84353	NA	NA	NA	NA	NA	NA	NA	NA	NA
OBP	OBP_to_OB2	Ipo5	FALSE	0.00299693	0.0440579	8.80934	-0.574267	NA	NA	NA	NA	NA	NA	NA	NA	NA
OBP	OBP_to_OB2	Iqgap3	FALSE	4.23e-07	1.46e-05	25.5852	-2.14378	NA	NA	NA	NA	NA	NA	NA	NA	NA
OBP	OBP_to_OB2	Irgm1	FALSE	5.42e-09	2.52e-07	34.0334	-1.63024	NA	NA	NA	NA	NA	NA	NA	NA	NA
OBP	OBP_to_OB2	Irx5	FALSE	0.000420824	0.00778561	12.4374	0.632688	NA	NA	NA	NA	NA	NA	NA	NA	NA
OBP	OBP_to_OB2	Islr	FALSE	0	0	112.223	-1.60894	NA	NA	NA	NA	NA	NA	NA	NA	NA
OBP	OBP_to_OB2	Itga1	FALSE	1.04e-13	9.28e-12	55.2957	-1.37701	NA	NA	NA	NA	NA	NA	NA	NA	NA
OBP	OBP_to_OB2	Itga10	FALSE	0.000230075	0.00454961	13.568	0.674013	NA	NA	NA	NA	NA	NA	NA	NA	NA
OBP	OBP_to_OB2	Itga9	FALSE	1.18e-14	1.12e-12	59.5773	-1.91515	NA	NA	NA	NA	NA	NA	NA	NA	NA
OBP	OBP_to_OB2	Itgbl1	FALSE	3.77e-15	3.75e-13	61.8352	-1.57552	NA	NA	NA	NA	NA	NA	NA	NA	NA
OBP	OBP_to_OB2	Itm2a	FALSE	0	0	78.4719	-1.30985	NA	NA	NA	NA	NA	NA	NA	NA	NA
OBP	OBP_to_OB2	Itm2b	FALSE	0.000473409	0.00866303	12.2176	0.500606	NA	NA	NA	NA	NA	NA	NA	NA	NA
OBP	OBP_to_OB2	Itpripl1	FALSE	0.00023115	0.00455436	13.5592	-1.28613	NA	NA	NA	NA	NA	NA	NA	NA	NA
OBP	OBP_to_OB2	Jag2	FALSE	0.000825457	0.0141894	11.1831	1.70276	NA	NA	NA	NA	NA	NA	NA	NA	NA
OBP	OBP_to_OB2	Jam2	FALSE	0	0	84.0518	1.5686	NA	NA	NA	NA	NA	NA	NA	NA	NA
OBP	OBP_to_OB2	Jph2	FALSE	0.000984447	0.0165701	10.8566	-1.03645	NA	NA	NA	NA	NA	NA	NA	NA	NA
OBP	OBP_to_OB2	Jpt1	FALSE	0.00306718	0.0449695	8.76707	-0.572667	NA	NA	NA	NA	NA	NA	NA	NA	NA
OBP	OBP_to_OB2	Jund	FALSE	7.56e-06	0.000206155	20.045	0.562978	NA	NA	NA	NA	NA	NA	NA	NA	NA
OBP	OBP_to_OB2	Kank1	FALSE	1.85e-08	8.04e-07	31.6451	0.996476	NA	NA	NA	NA	NA	NA	NA	NA	NA
OBP	OBP_to_OB2	Kazald1	FALSE	0	0	127.327	1.64986	NA	NA	NA	NA	NA	NA	NA	NA	NA
OBP	OBP_to_OB2	Kbtbd11	FALSE	0.00260977	0.0389698	9.062	0.778509	NA	NA	NA	NA	NA	NA	NA	NA	NA
OBP	OBP_to_OB2	Kcnb1	FALSE	4.76e-10	2.63e-08	38.774	1.42105	NA	NA	NA	NA	NA	NA	NA	NA	NA
OBP	OBP_to_OB2	Kcnc3	FALSE	7.22e-05	0.00161545	15.7517	0.971937	NA	NA	NA	NA	NA	NA	NA	NA	NA
OBP	OBP_to_OB2	Kcne4	FALSE	5.82e-05	0.00132472	16.1606	-1.10614	NA	NA	NA	NA	NA	NA	NA	NA	NA
OBP	OBP_to_OB2	Kcnip3	FALSE	0.00174864	0.027444	9.79629	-1.3591	NA	NA	NA	NA	NA	NA	NA	NA	NA
OBP	OBP_to_OB2	Kcnk1	FALSE	0	0	267.544	2.9816	NA	NA	NA	NA	NA	NA	NA	NA	NA
OBP	OBP_to_OB2	Kcnk2	FALSE	1.32e-10	8.11e-09	41.2754	-1.75667	NA	NA	NA	NA	NA	NA	NA	NA	NA
OBP	OBP_to_OB2	Kctd12	FALSE	0	0	139.178	-2.12241	NA	NA	NA	NA	NA	NA	NA	NA	NA
OBP	OBP_to_OB2	Kdelc2	FALSE	0.000202519	0.00405986	13.8076	-0.740619	NA	NA	NA	NA	NA	NA	NA	NA	NA
OBP	OBP_to_OB2	Kdelr3	FALSE	6.52e-05	0.0014702	15.9456	0.55357	NA	NA	NA	NA	NA	NA	NA	NA	NA
OBP	OBP_to_OB2	Kif11	FALSE	1.02e-09	5.3e-08	37.286	-2.41512	NA	NA	NA	NA	NA	NA	NA	NA	NA
OBP	OBP_to_OB2	Kif14	FALSE	2.75e-05	0.000672951	17.5814	-2.18906	NA	NA	NA	NA	NA	NA	NA	NA	NA
OBP	OBP_to_OB2	Kif15	FALSE	5.48e-06	0.000154428	20.6634	-1.75036	NA	NA	NA	NA	NA	NA	NA	NA	NA
OBP	OBP_to_OB2	Kif18a	FALSE	5.78e-06	0.000162424	20.5594	-1.84619	NA	NA	NA	NA	NA	NA	NA	NA	NA
OBP	OBP_to_OB2	Kif18b	FALSE	8.03e-05	0.00177532	15.5521	-2.57866	NA	NA	NA	NA	NA	NA	NA	NA	NA
OBP	OBP_to_OB2	Kif20a	FALSE	1.57e-06	4.96e-05	23.0622	-1.81261	NA	NA	NA	NA	NA	NA	NA	NA	NA
OBP	OBP_to_OB2	Kif20b	FALSE	2.17e-06	6.67e-05	22.44	-1.6887	NA	NA	NA	NA	NA	NA	NA	NA	NA
OBP	OBP_to_OB2	Kif22	FALSE	0.00156743	0.02485	9.99762	-0.992957	NA	NA	NA	NA	NA	NA	NA	NA	NA
OBP	OBP_to_OB2	Kif26a	FALSE	2.52e-06	7.62e-05	22.1532	2.14908	NA	NA	NA	NA	NA	NA	NA	NA	NA
OBP	OBP_to_OB2	Kif26b	FALSE	0.00179356	0.0280683	9.74966	-1.10567	NA	NA	NA	NA	NA	NA	NA	NA	NA
OBP	OBP_to_OB2	Kif2c	FALSE	2e-05	0.000504095	18.1874	-1.9159	NA	NA	NA	NA	NA	NA	NA	NA	NA
OBP	OBP_to_OB2	Kif4	FALSE	2.35e-07	8.52e-06	26.7226	-1.97962	NA	NA	NA	NA	NA	NA	NA	NA	NA
OBP	OBP_to_OB2	Kif5c	FALSE	0.00297834	0.0438222	8.82069	-1.61583	NA	NA	NA	NA	NA	NA	NA	NA	NA
OBP	OBP_to_OB2	Kifap3	FALSE	7.66e-05	0.00169941	15.6404	-0.704256	NA	NA	NA	NA	NA	NA	NA	NA	NA
OBP	OBP_to_OB2	Kifc1	FALSE	8.3e-06	0.000225207	19.8665	-1.68019	NA	NA	NA	NA	NA	NA	NA	NA	NA
OBP	OBP_to_OB2	Kitl	FALSE	0	0	128.717	-1.88044	NA	NA	NA	NA	NA	NA	NA	NA	NA
OBP	OBP_to_OB2	Klf12	FALSE	6.22e-07	2.1e-05	24.8436	1.33926	NA	NA	NA	NA	NA	NA	NA	NA	NA
OBP	OBP_to_OB2	Klhl30	FALSE	2.36e-09	1.16e-07	35.6503	1.75756	NA	NA	NA	NA	NA	NA	NA	NA	NA
OBP	OBP_to_OB2	Kng1	FALSE	0.000399821	0.00744751	12.533	-1.52642	NA	NA	NA	NA	NA	NA	NA	NA	NA
OBP	OBP_to_OB2	Knl1	FALSE	1.26e-07	4.82e-06	27.9296	-2.18929	NA	NA	NA	NA	NA	NA	NA	NA	NA
OBP	OBP_to_OB2	Knstrn	FALSE	3.41e-06	9.95e-05	21.573	-1.64796	NA	NA	NA	NA	NA	NA	NA	NA	NA
OBP	OBP_to_OB2	Kntc1	FALSE	0.000103681	0.00222563	15.0685	-1.58409	NA	NA	NA	NA	NA	NA	NA	NA	NA
OBP	OBP_to_OB2	Kpna2	FALSE	0.00012177	0.00257594	14.7651	-1.16408	NA	NA	NA	NA	NA	NA	NA	NA	NA
OBP	OBP_to_OB2	Kpnb1	FALSE	0.000224827	0.0044539	13.6113	-0.596254	NA	NA	NA	NA	NA	NA	NA	NA	NA
OBP	OBP_to_OB2	Kremen1	FALSE	0	0	111.139	-1.57306	NA	NA	NA	NA	NA	NA	NA	NA	NA
OBP	OBP_to_OB2	Kti12	FALSE	0.00124611	0.0202409	10.4207	-0.765972	NA	NA	NA	NA	NA	NA	NA	NA	NA
OBP	OBP_to_OB2	Kyat3	FALSE	2.88e-05	0.00070059	17.4942	-0.97727	NA	NA	NA	NA	NA	NA	NA	NA	NA
OBP	OBP_to_OB2	Lamb1	FALSE	2.78e-06	8.35e-05	21.9652	-1.15167	NA	NA	NA	NA	NA	NA	NA	NA	NA
OBP	OBP_to_OB2	Lamc1	FALSE	0.00261254	0.0389846	9.06005	-0.709958	NA	NA	NA	NA	NA	NA	NA	NA	NA
OBP	OBP_to_OB2	Lap3	FALSE	0.00282068	0.0418529	8.91998	-0.565546	NA	NA	NA	NA	NA	NA	NA	NA	NA
OBP	OBP_to_OB2	Lbp	FALSE	0.00101655	0.0170157	10.7972	-1.2618	NA	NA	NA	NA	NA	NA	NA	NA	NA
OBP	OBP_to_OB2	Ldb3	FALSE	1.33e-05	0.000350668	18.9601	-1.35991	NA	NA	NA	NA	NA	NA	NA	NA	NA
OBP	OBP_to_OB2	Lepr	FALSE	2.12e-05	0.000529167	18.0819	-1.12299	NA	NA	NA	NA	NA	NA	NA	NA	NA
OBP	OBP_to_OB2	Lfng	FALSE	0.000463517	0.0085034	12.257	-0.851651	NA	NA	NA	NA	NA	NA	NA	NA	NA
OBP	OBP_to_OB2	Lgals3bp	FALSE	3.28e-05	0.000786425	17.2472	-0.746955	NA	NA	NA	NA	NA	NA	NA	NA	NA
OBP	OBP_to_OB2	Lgr4	FALSE	2.53e-05	0.000622457	17.7447	0.799904	NA	NA	NA	NA	NA	NA	NA	NA	NA
OBP	OBP_to_OB2	Lgr6	FALSE	2.21e-07	8.08e-06	26.8369	1.42472	NA	NA	NA	NA	NA	NA	NA	NA	NA
OBP	OBP_to_OB2	Lig1	FALSE	3.09e-09	1.49e-07	35.1243	-1.35792	NA	NA	NA	NA	NA	NA	NA	NA	NA
OBP	OBP_to_OB2	Lima1	FALSE	0	0	80.8817	-1.16186	NA	NA	NA	NA	NA	NA	NA	NA	NA
OBP	OBP_to_OB2	Limch1	FALSE	0	0	70.7637	-2.11791	NA	NA	NA	NA	NA	NA	NA	NA	NA
OBP	OBP_to_OB2	Lims1	FALSE	0	0	83.5208	-0.990138	NA	NA	NA	NA	NA	NA	NA	NA	NA
OBP	OBP_to_OB2	Lims2	FALSE	2.15e-05	0.000536774	18.0503	-1.80924	NA	NA	NA	NA	NA	NA	NA	NA	NA
OBP	OBP_to_OB2	Lingo3	FALSE	3.35e-06	9.8e-05	21.6076	1.21577	NA	NA	NA	NA	NA	NA	NA	NA	NA
OBP	OBP_to_OB2	Lipc	FALSE	0	0	172.066	3.01222	NA	NA	NA	NA	NA	NA	NA	NA	NA
OBP	OBP_to_OB2	Lman1	FALSE	9.92e-05	0.00214297	15.1511	0.534341	NA	NA	NA	NA	NA	NA	NA	NA	NA
OBP	OBP_to_OB2	Lmcd1	FALSE	6.66e-16	7.34e-14	65.2066	-2.12422	NA	NA	NA	NA	NA	NA	NA	NA	NA
OBP	OBP_to_OB2	Lmna	FALSE	0	0	77.6685	-0.808748	NA	NA	NA	NA	NA	NA	NA	NA	NA
OBP	OBP_to_OB2	Lmnb1	FALSE	1.27e-12	1e-10	50.3732	-2.09854	NA	NA	NA	NA	NA	NA	NA	NA	NA
OBP	OBP_to_OB2	Lmod1	FALSE	1.07e-05	0.000284419	19.3759	-2.10649	NA	NA	NA	NA	NA	NA	NA	NA	NA
OBP	OBP_to_OB2	Lnx2	FALSE	0.00249388	0.0373671	9.14508	0.775137	NA	NA	NA	NA	NA	NA	NA	NA	NA
OBP	OBP_to_OB2	Loxl1	FALSE	0	0	90.8698	-1.52829	NA	NA	NA	NA	NA	NA	NA	NA	NA
OBP	OBP_to_OB2	Loxl2	FALSE	2.9e-09	1.41e-07	35.2467	0.78646	NA	NA	NA	NA	NA	NA	NA	NA	NA
OBP	OBP_to_OB2	Loxl4	FALSE	0	0	108.435	1.84541	NA	NA	NA	NA	NA	NA	NA	NA	NA
OBP	OBP_to_OB2	Lpar3	FALSE	1.11e-16	1.3e-14	68.0556	2.09912	NA	NA	NA	NA	NA	NA	NA	NA	NA
OBP	OBP_to_OB2	Lpar4	FALSE	1.8e-05	0.000456317	18.3948	-2.3774	NA	NA	NA	NA	NA	NA	NA	NA	NA
OBP	OBP_to_OB2	Lpcat1	FALSE	1.82e-05	0.000461119	18.3726	-0.86974	NA	NA	NA	NA	NA	NA	NA	NA	NA
OBP	OBP_to_OB2	Lpcat4	FALSE	0.00327567	0.0475158	8.64718	-1.11956	NA	NA	NA	NA	NA	NA	NA	NA	NA
OBP	OBP_to_OB2	Lpl	FALSE	3.49e-05	0.000831674	17.1306	-0.835984	NA	NA	NA	NA	NA	NA	NA	NA	NA
OBP	OBP_to_OB2	Lpp	FALSE	1.97e-08	8.54e-07	31.5222	-0.682764	NA	NA	NA	NA	NA	NA	NA	NA	NA
OBP	OBP_to_OB2	Lrch2	FALSE	0.000117897	0.00250128	14.826	-1.45135	NA	NA	NA	NA	NA	NA	NA	NA	NA
OBP	OBP_to_OB2	Lrig3	FALSE	0.000133086	0.00280986	14.5976	-0.911591	NA	NA	NA	NA	NA	NA	NA	NA	NA
OBP	OBP_to_OB2	Lrp4	FALSE	0.000348264	0.00659978	12.7911	-0.76767	NA	NA	NA	NA	NA	NA	NA	NA	NA
OBP	OBP_to_OB2	Lrr1	FALSE	0.000102982	0.00221498	15.0812	-2.24181	NA	NA	NA	NA	NA	NA	NA	NA	NA
OBP	OBP_to_OB2	Lrrn4cl	FALSE	0.00119103	0.0195646	10.5042	1.02025	NA	NA	NA	NA	NA	NA	NA	NA	NA
OBP	OBP_to_OB2	Lsm2	FALSE	1.7e-07	6.34e-06	27.3493	-0.785799	NA	NA	NA	NA	NA	NA	NA	NA	NA
OBP	OBP_to_OB2	Lsm5	FALSE	2.65e-07	9.46e-06	26.4916	-0.73605	NA	NA	NA	NA	NA	NA	NA	NA	NA
OBP	OBP_to_OB2	Lsp1	FALSE	6.27e-11	4e-09	42.7349	-1.44487	NA	NA	NA	NA	NA	NA	NA	NA	NA
OBP	OBP_to_OB2	Ltbp1	FALSE	3.9e-06	0.000112442	21.3114	-0.643857	NA	NA	NA	NA	NA	NA	NA	NA	NA
OBP	OBP_to_OB2	Ltbp2	FALSE	2e-10	1.19e-08	40.4643	-2.00424	NA	NA	NA	NA	NA	NA	NA	NA	NA
OBP	OBP_to_OB2	Ly75	FALSE	1.38e-09	7.06e-08	36.6947	-1.60928	NA	NA	NA	NA	NA	NA	NA	NA	NA
OBP	OBP_to_OB2	Lyar	FALSE	1.38e-08	6.12e-07	32.2091	-0.899969	NA	NA	NA	NA	NA	NA	NA	NA	NA
OBP	OBP_to_OB2	Lynx1	FALSE	3.75e-06	0.000108717	21.3861	-1.45444	NA	NA	NA	NA	NA	NA	NA	NA	NA
OBP	OBP_to_OB2	Lysmd2	FALSE	1.18e-10	7.27e-09	41.5055	-1.32799	NA	NA	NA	NA	NA	NA	NA	NA	NA
OBP	OBP_to_OB2	Lyst	FALSE	2.54e-05	0.000624243	17.7371	0.83626	NA	NA	NA	NA	NA	NA	NA	NA	NA
OBP	OBP_to_OB2	Lyz2	FALSE	1.22e-07	4.69e-06	27.9837	1.13116	NA	NA	NA	NA	NA	NA	NA	NA	NA
OBP	OBP_to_OB2	Mad2l1	FALSE	3e-15	3e-13	62.2651	-1.96018	NA	NA	NA	NA	NA	NA	NA	NA	NA
OBP	OBP_to_OB2	Maf	FALSE	1.27e-11	9e-10	45.8536	-0.969057	NA	NA	NA	NA	NA	NA	NA	NA	NA
OBP	OBP_to_OB2	Magi1	FALSE	2.33e-07	8.47e-06	26.7396	1.14304	NA	NA	NA	NA	NA	NA	NA	NA	NA
OBP	OBP_to_OB2	Magohb	FALSE	1.89e-05	0.000476922	18.2996	-0.722871	NA	NA	NA	NA	NA	NA	NA	NA	NA
OBP	OBP_to_OB2	Mamdc2	FALSE	5.41e-06	0.00015299	20.6859	1.63626	NA	NA	NA	NA	NA	NA	NA	NA	NA
OBP	OBP_to_OB2	Maml2	FALSE	3.12e-08	1.32e-06	30.6317	-1.52706	NA	NA	NA	NA	NA	NA	NA	NA	NA
OBP	OBP_to_OB2	Man1a	FALSE	0.0011979	0.0196434	10.4936	-0.784404	NA	NA	NA	NA	NA	NA	NA	NA	NA
OBP	OBP_to_OB2	Man2a1	FALSE	0.000669023	0.0117505	11.5734	-0.671287	NA	NA	NA	NA	NA	NA	NA	NA	NA
OBP	OBP_to_OB2	Manf	FALSE	0.000391652	0.00732034	12.5716	0.56729	NA	NA	NA	NA	NA	NA	NA	NA	NA
OBP	OBP_to_OB2	Maoa	FALSE	4.82e-09	2.26e-07	34.2626	-1.10314	NA	NA	NA	NA	NA	NA	NA	NA	NA
OBP	OBP_to_OB2	Maob	FALSE	5.65e-05	0.00128941	16.2157	-1.3168	NA	NA	NA	NA	NA	NA	NA	NA	NA
OBP	OBP_to_OB2	Map1b	FALSE	5.59e-05	0.00127863	16.2356	-0.922632	NA	NA	NA	NA	NA	NA	NA	NA	NA
OBP	OBP_to_OB2	Map2k6	FALSE	3.59e-07	1.25e-05	25.9008	1.46243	NA	NA	NA	NA	NA	NA	NA	NA	NA
OBP	OBP_to_OB2	Map6	FALSE	0.00039474	0.00737174	12.5569	-1.50049	NA	NA	NA	NA	NA	NA	NA	NA	NA
OBP	OBP_to_OB2	Map7d3	FALSE	3.03e-05	0.000731665	17.3998	-1.53301	NA	NA	NA	NA	NA	NA	NA	NA	NA
OBP	OBP_to_OB2	Mapk11	FALSE	0.00106061	0.0176077	10.7187	-2.14379	NA	NA	NA	NA	NA	NA	NA	NA	NA
OBP	OBP_to_OB2	Mapk3	FALSE	0.0033744	0.0488181	8.5931	-0.546575	NA	NA	NA	NA	NA	NA	NA	NA	NA
OBP	OBP_to_OB2	2023-03-01	FALSE	0	0	112.775	-2.04272	NA	NA	NA	NA	NA	NA	NA	NA	NA
OBP	OBP_to_OB2	Marcks	FALSE	0	0	321.188	-1.4639	NA	NA	NA	NA	NA	NA	NA	NA	NA
OBP	OBP_to_OB2	Mastl	FALSE	2.15e-08	9.19e-07	31.3574	-2.01478	NA	NA	NA	NA	NA	NA	NA	NA	NA
OBP	OBP_to_OB2	Mat2a	FALSE	1.63e-07	6.1e-06	27.4328	-0.721844	NA	NA	NA	NA	NA	NA	NA	NA	NA
OBP	OBP_to_OB2	Matn2	FALSE	0.000818453	0.0140801	11.1989	-0.773873	NA	NA	NA	NA	NA	NA	NA	NA	NA
OBP	OBP_to_OB2	Mcc	FALSE	2.55e-07	9.2e-06	26.5617	-1.41965	NA	NA	NA	NA	NA	NA	NA	NA	NA
OBP	OBP_to_OB2	Mcm2	FALSE	9.42e-08	3.69e-06	28.4887	-1.26094	NA	NA	NA	NA	NA	NA	NA	NA	NA
OBP	OBP_to_OB2	Mcm3	FALSE	3.81e-10	2.13e-08	39.2072	-1.60788	NA	NA	NA	NA	NA	NA	NA	NA	NA
OBP	OBP_to_OB2	Mcm4	FALSE	2.66e-15	2.69e-13	62.4883	-1.88981	NA	NA	NA	NA	NA	NA	NA	NA	NA
OBP	OBP_to_OB2	Mcm5	FALSE	3.19e-08	1.34e-06	30.5879	-1.54822	NA	NA	NA	NA	NA	NA	NA	NA	NA
OBP	OBP_to_OB2	Mcm6	FALSE	4.66e-13	3.88e-11	52.3421	-1.71108	NA	NA	NA	NA	NA	NA	NA	NA	NA
OBP	OBP_to_OB2	Mcm7	FALSE	1.71e-06	5.38e-05	22.8918	-0.958778	NA	NA	NA	NA	NA	NA	NA	NA	NA
OBP	OBP_to_OB2	Mcm8	FALSE	0.000732726	0.0127358	11.4043	-1.14256	NA	NA	NA	NA	NA	NA	NA	NA	NA
OBP	OBP_to_OB2	Mcur1	FALSE	0.000738278	0.0128221	11.3903	0.565074	NA	NA	NA	NA	NA	NA	NA	NA	NA
OBP	OBP_to_OB2	Mdfi	FALSE	6.12e-05	0.00138806	16.0662	1.08725	NA	NA	NA	NA	NA	NA	NA	NA	NA
OBP	OBP_to_OB2	Meaf6	FALSE	4.07e-09	1.93e-07	34.5902	-1.09344	NA	NA	NA	NA	NA	NA	NA	NA	NA
OBP	OBP_to_OB2	Megf10	FALSE	5.09e-12	3.74e-10	47.6514	-1.35942	NA	NA	NA	NA	NA	NA	NA	NA	NA
OBP	OBP_to_OB2	Melk	FALSE	4.03e-09	1.91e-07	34.611	-2.17269	NA	NA	NA	NA	NA	NA	NA	NA	NA
OBP	OBP_to_OB2	Mepe	FALSE	0	0	191.928	3.35632	NA	NA	NA	NA	NA	NA	NA	NA	NA
OBP	OBP_to_OB2	Mest	FALSE	4.53e-09	2.14e-07	34.3833	-2.46326	NA	NA	NA	NA	NA	NA	NA	NA	NA
OBP	OBP_to_OB2	Metrnl	FALSE	8.44e-12	6.1e-10	46.661	0.822652	NA	NA	NA	NA	NA	NA	NA	NA	NA
OBP	OBP_to_OB2	Mettl16	FALSE	0.00145951	0.023394	10.129	-0.726733	NA	NA	NA	NA	NA	NA	NA	NA	NA
OBP	OBP_to_OB2	Mfap3l	FALSE	0.0019996	0.030916	9.5499	0.852151	NA	NA	NA	NA	NA	NA	NA	NA	NA
OBP	OBP_to_OB2	Mfap5	FALSE	2.06e-09	1.02e-07	35.9162	-2.44988	NA	NA	NA	NA	NA	NA	NA	NA	NA
OBP	OBP_to_OB2	Mfhas1	FALSE	4.77e-05	0.00110706	16.5387	-1.08634	NA	NA	NA	NA	NA	NA	NA	NA	NA
OBP	OBP_to_OB2	Mfsd10	FALSE	4.84e-06	0.00013706	20.9011	-0.799591	NA	NA	NA	NA	NA	NA	NA	NA	NA
OBP	OBP_to_OB2	Mgmt	FALSE	1.36e-07	5.16e-06	27.7786	-0.824878	NA	NA	NA	NA	NA	NA	NA	NA	NA
OBP	OBP_to_OB2	Mgp	FALSE	0	0	190.141	-2.51319	NA	NA	NA	NA	NA	NA	NA	NA	NA
OBP	OBP_to_OB2	Mgst1	FALSE	1.34e-10	8.17e-09	41.2554	-1.39465	NA	NA	NA	NA	NA	NA	NA	NA	NA
OBP	OBP_to_OB2	Mgst3	FALSE	0	0	188.348	1.45211	NA	NA	NA	NA	NA	NA	NA	NA	NA
OBP	OBP_to_OB2	Mical3	FALSE	6.67e-07	2.24e-05	24.7088	0.819836	NA	NA	NA	NA	NA	NA	NA	NA	NA
OBP	OBP_to_OB2	Mien1	FALSE	0.000912666	0.0154813	10.9969	0.551509	NA	NA	NA	NA	NA	NA	NA	NA	NA
OBP	OBP_to_OB2	Miip	FALSE	0.000352565	0.00667549	12.7682	-1.00074	NA	NA	NA	NA	NA	NA	NA	NA	NA
OBP	OBP_to_OB2	Mill2	FALSE	0.00328527	0.0476233	8.64185	-0.96581	NA	NA	NA	NA	NA	NA	NA	NA	NA
OBP	OBP_to_OB2	Mis18a	FALSE	5e-05	0.00115754	16.4481	-1.0851	NA	NA	NA	NA	NA	NA	NA	NA	NA
OBP	OBP_to_OB2	Mis18bp1	FALSE	1.42e-05	0.00037217	18.8397	-1.75135	NA	NA	NA	NA	NA	NA	NA	NA	NA
OBP	OBP_to_OB2	Mki67	FALSE	1.07e-08	4.77e-07	32.7124	-2.04245	NA	NA	NA	NA	NA	NA	NA	NA	NA
OBP	OBP_to_OB2	Mlip	FALSE	1.11e-16	1.3e-14	68.3589	2.74469	NA	NA	NA	NA	NA	NA	NA	NA	NA
OBP	OBP_to_OB2	Mlkl	FALSE	0.00180702	0.0282384	9.73591	-0.978495	NA	NA	NA	NA	NA	NA	NA	NA	NA
OBP	OBP_to_OB2	Mmd	FALSE	6.08e-13	4.93e-11	51.8212	-1.44031	NA	NA	NA	NA	NA	NA	NA	NA	NA
OBP	OBP_to_OB2	Mmp11	FALSE	9.45e-05	0.0020586	15.2438	-1.26398	NA	NA	NA	NA	NA	NA	NA	NA	NA
OBP	OBP_to_OB2	Mmp13	FALSE	1.07e-12	8.5e-11	50.7101	-1.56052	NA	NA	NA	NA	NA	NA	NA	NA	NA
OBP	OBP_to_OB2	Mmp14	FALSE	0	0	75.8659	-0.961694	NA	NA	NA	NA	NA	NA	NA	NA	NA
OBP	OBP_to_OB2	Mmp17	FALSE	0.000555831	0.0100118	11.9184	-1.54002	NA	NA	NA	NA	NA	NA	NA	NA	NA
OBP	OBP_to_OB2	Mmp19	FALSE	0.00324086	0.047136	8.66665	-0.998981	NA	NA	NA	NA	NA	NA	NA	NA	NA
OBP	OBP_to_OB2	Mms22l	FALSE	1.55e-05	0.000397307	18.6794	-1.37886	NA	NA	NA	NA	NA	NA	NA	NA	NA
OBP	OBP_to_OB2	Mnd1	FALSE	3.54e-09	1.69e-07	34.864	-1.52017	NA	NA	NA	NA	NA	NA	NA	NA	NA
OBP	OBP_to_OB2	Mns1	FALSE	0.000988449	0.0166247	10.8491	-1.26674	NA	NA	NA	NA	NA	NA	NA	NA	NA
OBP	OBP_to_OB2	Mob3b	FALSE	0.00172008	0.0270152	9.82658	1.2268	NA	NA	NA	NA	NA	NA	NA	NA	NA
OBP	OBP_to_OB2	Mpdz	FALSE	5.29e-05	0.00121725	16.3427	-0.849755	NA	NA	NA	NA	NA	NA	NA	NA	NA
OBP	OBP_to_OB2	Mpp2	FALSE	0.00157963	0.0250072	9.98334	0.943952	NA	NA	NA	NA	NA	NA	NA	NA	NA
OBP	OBP_to_OB2	Mpv17l	FALSE	2.11e-06	6.52e-05	22.4902	0.96001	NA	NA	NA	NA	NA	NA	NA	NA	NA
OBP	OBP_to_OB2	Mpzl1	FALSE	0.00152487	0.0243167	10.0483	-0.598575	NA	NA	NA	NA	NA	NA	NA	NA	NA
OBP	OBP_to_OB2	Mrc2	FALSE	0	0	115.409	1.15525	NA	NA	NA	NA	NA	NA	NA	NA	NA
OBP	OBP_to_OB2	Mrgprf	FALSE	0.000227008	0.00449303	13.5932	-1.76121	NA	NA	NA	NA	NA	NA	NA	NA	NA
OBP	OBP_to_OB2	Mrps22	FALSE	0.000222799	0.00441773	13.6283	-0.829847	NA	NA	NA	NA	NA	NA	NA	NA	NA
OBP	OBP_to_OB2	Mrps31	FALSE	0.00038056	0.0071559	12.6253	-0.79248	NA	NA	NA	NA	NA	NA	NA	NA	NA
OBP	OBP_to_OB2	Mrps6	FALSE	1.22e-07	4.69e-06	27.9882	-0.841862	NA	NA	NA	NA	NA	NA	NA	NA	NA
OBP	OBP_to_OB2	Ms4a4d	FALSE	2.68e-10	1.56e-08	39.8967	-1.92867	NA	NA	NA	NA	NA	NA	NA	NA	NA
OBP	OBP_to_OB2	Msi1	FALSE	2.22e-16	2.54e-14	67.1368	1.41355	NA	NA	NA	NA	NA	NA	NA	NA	NA
OBP	OBP_to_OB2	Mt1	FALSE	0	0	104.129	1.33842	NA	NA	NA	NA	NA	NA	NA	NA	NA
OBP	OBP_to_OB2	Mt2	FALSE	1.15e-07	4.45e-06	28.0987	1.12578	NA	NA	NA	NA	NA	NA	NA	NA	NA
OBP	OBP_to_OB2	Mtap	FALSE	1.47e-08	6.48e-07	32.09	-0.96697	NA	NA	NA	NA	NA	NA	NA	NA	NA
OBP	OBP_to_OB2	Mthfd1	FALSE	0.00050477	0.00917538	12.098	-0.800554	NA	NA	NA	NA	NA	NA	NA	NA	NA
OBP	OBP_to_OB2	Mtpn	FALSE	4.38e-06	0.000125008	21.0907	0.591323	NA	NA	NA	NA	NA	NA	NA	NA	NA
OBP	OBP_to_OB2	Mxd1	FALSE	3.75e-08	1.57e-06	30.2763	0.885458	NA	NA	NA	NA	NA	NA	NA	NA	NA
OBP	OBP_to_OB2	Mxd3	FALSE	2.56e-06	7.74e-05	22.1201	-2.09651	NA	NA	NA	NA	NA	NA	NA	NA	NA
OBP	OBP_to_OB2	Mxra7	FALSE	2.08e-10	1.24e-08	40.3929	-1.05563	NA	NA	NA	NA	NA	NA	NA	NA	NA
OBP	OBP_to_OB2	Mxra8	FALSE	3.26e-06	9.62e-05	21.6544	-0.665183	NA	NA	NA	NA	NA	NA	NA	NA	NA
OBP	OBP_to_OB2	Myadm	FALSE	0	0	108.097	-1.272	NA	NA	NA	NA	NA	NA	NA	NA	NA
OBP	OBP_to_OB2	Mybbp1a	FALSE	7.82e-07	2.6e-05	24.4028	-0.800943	NA	NA	NA	NA	NA	NA	NA	NA	NA
OBP	OBP_to_OB2	Mybl1	FALSE	0.00176857	0.0276971	9.77545	-1.29961	NA	NA	NA	NA	NA	NA	NA	NA	NA
OBP	OBP_to_OB2	Mybl2	FALSE	3.72e-06	0.000107905	21.403	-1.7542	NA	NA	NA	NA	NA	NA	NA	NA	NA
OBP	OBP_to_OB2	Mydgf	FALSE	5.6e-09	2.59e-07	33.9692	0.635792	NA	NA	NA	NA	NA	NA	NA	NA	NA
OBP	OBP_to_OB2	Myh10	FALSE	0.00122101	0.0199073	10.4583	-0.971483	NA	NA	NA	NA	NA	NA	NA	NA	NA
OBP	OBP_to_OB2	Myh9	FALSE	1.77e-05	0.000451319	18.4224	-0.638578	NA	NA	NA	NA	NA	NA	NA	NA	NA
OBP	OBP_to_OB2	Myl9	FALSE	0	0	277.001	-2.17022	NA	NA	NA	NA	NA	NA	NA	NA	NA
OBP	OBP_to_OB2	Mylk	FALSE	0	0	206.722	-1.82262	NA	NA	NA	NA	NA	NA	NA	NA	NA
OBP	OBP_to_OB2	Myo1b	FALSE	6.95e-06	0.000190515	20.2079	0.613025	NA	NA	NA	NA	NA	NA	NA	NA	NA
OBP	OBP_to_OB2	Myocd	FALSE	9.83e-05	0.00212712	15.1699	-2.28627	NA	NA	NA	NA	NA	NA	NA	NA	NA
OBP	OBP_to_OB2	Naa20	FALSE	0.00212496	0.0326001	9.43834	-0.594664	NA	NA	NA	NA	NA	NA	NA	NA	NA
OBP	OBP_to_OB2	Naaladl2	FALSE	0.000266834	0.00516423	13.2899	-1.18073	NA	NA	NA	NA	NA	NA	NA	NA	NA
OBP	OBP_to_OB2	Nap1l1	FALSE	0	0	77.2008	-0.86067	NA	NA	NA	NA	NA	NA	NA	NA	NA
OBP	OBP_to_OB2	Nasp	FALSE	4.03e-09	1.91e-07	34.6108	-0.976975	NA	NA	NA	NA	NA	NA	NA	NA	NA
OBP	OBP_to_OB2	Ncald	FALSE	2.93e-05	0.000710017	17.4646	1.10306	NA	NA	NA	NA	NA	NA	NA	NA	NA
OBP	OBP_to_OB2	Ncapd2	FALSE	5.47e-05	0.00125472	16.2793	-1.17317	NA	NA	NA	NA	NA	NA	NA	NA	NA
OBP	OBP_to_OB2	Ncapd3	FALSE	0.000187516	0.00379745	13.9522	-0.952129	NA	NA	NA	NA	NA	NA	NA	NA	NA
OBP	OBP_to_OB2	Ncapg	FALSE	7.41e-07	2.47e-05	24.5053	-1.9284	NA	NA	NA	NA	NA	NA	NA	NA	NA
OBP	OBP_to_OB2	Ncapg2	FALSE	2.16e-06	6.65e-05	22.4469	-1.27529	NA	NA	NA	NA	NA	NA	NA	NA	NA
OBP	OBP_to_OB2	Ncaph	FALSE	2.48e-07	8.98e-06	26.6149	-1.83213	NA	NA	NA	NA	NA	NA	NA	NA	NA
OBP	OBP_to_OB2	Ncl	FALSE	2.75e-08	1.17e-06	30.8783	-0.656283	NA	NA	NA	NA	NA	NA	NA	NA	NA
OBP	OBP_to_OB2	Ncoa7	FALSE	0.000327951	0.00624193	12.9036	-0.777331	NA	NA	NA	NA	NA	NA	NA	NA	NA
OBP	OBP_to_OB2	Ndc1	FALSE	0.000248485	0.00484346	13.4235	-0.946944	NA	NA	NA	NA	NA	NA	NA	NA	NA
OBP	OBP_to_OB2	Ndc80	FALSE	2.33e-05	0.000577495	17.9024	-1.62055	NA	NA	NA	NA	NA	NA	NA	NA	NA
OBP	OBP_to_OB2	Ndn	FALSE	1.78e-12	1.38e-10	49.7106	-1.60633	NA	NA	NA	NA	NA	NA	NA	NA	NA
OBP	OBP_to_OB2	Ndnf	FALSE	0	0	409.706	-3.03138	NA	NA	NA	NA	NA	NA	NA	NA	NA
OBP	OBP_to_OB2	Ndufa1	FALSE	0	0	120.451	0.987145	NA	NA	NA	NA	NA	NA	NA	NA	NA
OBP	OBP_to_OB2	Ndufa4	FALSE	6.15e-05	0.0013953	16.0544	-0.578029	NA	NA	NA	NA	NA	NA	NA	NA	NA
OBP	OBP_to_OB2	Ndufaf4	FALSE	0.000566974	0.0101873	11.8814	-0.769138	NA	NA	NA	NA	NA	NA	NA	NA	NA
OBP	OBP_to_OB2	Ndufaf6	FALSE	0.000372512	0.00701062	12.6653	-0.886306	NA	NA	NA	NA	NA	NA	NA	NA	NA
OBP	OBP_to_OB2	Ndufv3	FALSE	8.65e-05	0.00190285	15.4114	0.544002	NA	NA	NA	NA	NA	NA	NA	NA	NA
OBP	OBP_to_OB2	Neat1	FALSE	2.04e-08	8.81e-07	31.4581	0.842255	NA	NA	NA	NA	NA	NA	NA	NA	NA
OBP	OBP_to_OB2	Necab3	FALSE	0.000162821	0.00335334	14.2178	1.8611	NA	NA	NA	NA	NA	NA	NA	NA	NA
OBP	OBP_to_OB2	Neil3	FALSE	9.67e-05	0.00209875	15.1998	-1.89622	NA	NA	NA	NA	NA	NA	NA	NA	NA
OBP	OBP_to_OB2	Nek2	FALSE	2.6e-05	0.000638583	17.6896	-1.66592	NA	NA	NA	NA	NA	NA	NA	NA	NA
OBP	OBP_to_OB2	Nek7	FALSE	0.00115764	0.0190447	10.5568	-0.640555	NA	NA	NA	NA	NA	NA	NA	NA	NA
OBP	OBP_to_OB2	Net1	FALSE	2.33e-15	2.38e-13	62.7762	-1.34319	NA	NA	NA	NA	NA	NA	NA	NA	NA
OBP	OBP_to_OB2	Neu1	FALSE	0.000192585	0.00388929	13.9021	0.685741	NA	NA	NA	NA	NA	NA	NA	NA	NA
OBP	OBP_to_OB2	Neurl1a	FALSE	2.98e-06	8.9e-05	21.8296	0.957532	NA	NA	NA	NA	NA	NA	NA	NA	NA
OBP	OBP_to_OB2	Nfatc4	FALSE	4.44e-16	4.97e-14	66.0851	-1.59257	NA	NA	NA	NA	NA	NA	NA	NA	NA
OBP	OBP_to_OB2	Nfib	FALSE	3.38e-10	1.93e-08	39.4404	-0.803527	NA	NA	NA	NA	NA	NA	NA	NA	NA
OBP	OBP_to_OB2	Nfix	FALSE	0.000827981	0.0142216	11.1774	-0.556027	NA	NA	NA	NA	NA	NA	NA	NA	NA
OBP	OBP_to_OB2	Nhp2	FALSE	0.000365506	0.00690256	12.7008	-0.597924	NA	NA	NA	NA	NA	NA	NA	NA	NA
OBP	OBP_to_OB2	Nhs	FALSE	5.98e-06	0.000167768	20.495	-1.43119	NA	NA	NA	NA	NA	NA	NA	NA	NA
OBP	OBP_to_OB2	Nid1	FALSE	2.09e-09	1.03e-07	35.8894	-1.77146	NA	NA	NA	NA	NA	NA	NA	NA	NA
OBP	OBP_to_OB2	Nin	FALSE	0.00017366	0.00355644	14.0966	-0.838627	NA	NA	NA	NA	NA	NA	NA	NA	NA
OBP	OBP_to_OB2	Ninj1	FALSE	0.000772596	0.0133332	11.3059	0.643445	NA	NA	NA	NA	NA	NA	NA	NA	NA
OBP	OBP_to_OB2	Nkd2	FALSE	1.78e-15	1.85e-13	63.2768	-1.73355	NA	NA	NA	NA	NA	NA	NA	NA	NA
OBP	OBP_to_OB2	Nme4	FALSE	2.29e-13	1.96e-11	53.7387	-1.39115	NA	NA	NA	NA	NA	NA	NA	NA	NA
OBP	OBP_to_OB2	Nmral1	FALSE	0.000110423	0.00235414	14.9496	-0.917602	NA	NA	NA	NA	NA	NA	NA	NA	NA
OBP	OBP_to_OB2	Noc4l	FALSE	0.000243854	0.00476287	13.4588	-0.824699	NA	NA	NA	NA	NA	NA	NA	NA	NA
OBP	OBP_to_OB2	Nolc1	FALSE	0.0013928	0.0223904	10.2153	-0.627325	NA	NA	NA	NA	NA	NA	NA	NA	NA
OBP	OBP_to_OB2	Nop14	FALSE	0.00161707	0.0255074	9.94021	-0.700602	NA	NA	NA	NA	NA	NA	NA	NA	NA
OBP	OBP_to_OB2	Nop2	FALSE	0.00119583	0.0196287	10.4968	-0.812371	NA	NA	NA	NA	NA	NA	NA	NA	NA
OBP	OBP_to_OB2	Nop56	FALSE	2.72e-07	9.68e-06	26.4395	-0.818943	NA	NA	NA	NA	NA	NA	NA	NA	NA
OBP	OBP_to_OB2	Nop58	FALSE	8.76e-08	3.47e-06	28.6312	-0.74499	NA	NA	NA	NA	NA	NA	NA	NA	NA
OBP	OBP_to_OB2	Nox4	FALSE	0.00112566	0.0186028	10.6085	-1.93545	NA	NA	NA	NA	NA	NA	NA	NA	NA
OBP	OBP_to_OB2	Npm1	FALSE	1.71e-05	0.000437649	18.4855	-0.556258	NA	NA	NA	NA	NA	NA	NA	NA	NA
OBP	OBP_to_OB2	Npm3	FALSE	9.66e-15	9.33e-13	59.9755	-1.08415	NA	NA	NA	NA	NA	NA	NA	NA	NA
OBP	OBP_to_OB2	Npnt	FALSE	3.44e-10	1.96e-08	39.4072	-1.09671	NA	NA	NA	NA	NA	NA	NA	NA	NA
OBP	OBP_to_OB2	Nr2f2	FALSE	0.000671003	0.011766	11.5679	-0.928675	NA	NA	NA	NA	NA	NA	NA	NA	NA
OBP	OBP_to_OB2	Nradd	FALSE	3.25e-10	1.86e-08	39.5159	-1.04431	NA	NA	NA	NA	NA	NA	NA	NA	NA
OBP	OBP_to_OB2	Nrcam	FALSE	0.00249134	0.0373546	9.14695	0.822031	NA	NA	NA	NA	NA	NA	NA	NA	NA
OBP	OBP_to_OB2	Nrip1	FALSE	0.00221682	0.0337956	9.36075	-0.650635	NA	NA	NA	NA	NA	NA	NA	NA	NA
OBP	OBP_to_OB2	Nrp1	FALSE	2.47e-10	1.44e-08	40.053	-0.9419	NA	NA	NA	NA	NA	NA	NA	NA	NA
OBP	OBP_to_OB2	Nsg1	FALSE	0	0	121.392	-1.67082	NA	NA	NA	NA	NA	NA	NA	NA	NA
OBP	OBP_to_OB2	Nsmce4a	FALSE	1.07e-09	5.53e-08	37.1956	-0.888523	NA	NA	NA	NA	NA	NA	NA	NA	NA
OBP	OBP_to_OB2	Nucks1	FALSE	2e-12	1.54e-10	49.4816	-0.771799	NA	NA	NA	NA	NA	NA	NA	NA	NA
OBP	OBP_to_OB2	Nudt16	FALSE	0.000772343	0.0133332	11.3065	-0.854184	NA	NA	NA	NA	NA	NA	NA	NA	NA
OBP	OBP_to_OB2	Nudt21	FALSE	0.00297086	0.0437631	8.82528	-0.542475	NA	NA	NA	NA	NA	NA	NA	NA	NA
OBP	OBP_to_OB2	Nudt4	FALSE	1.47e-06	4.65e-05	23.1915	-0.744837	NA	NA	NA	NA	NA	NA	NA	NA	NA
OBP	OBP_to_OB2	Nudt7	FALSE	0.00312104	0.0456672	8.73532	-0.934912	NA	NA	NA	NA	NA	NA	NA	NA	NA
OBP	OBP_to_OB2	Nuf2	FALSE	1.81e-07	6.71e-06	27.2286	-1.96471	NA	NA	NA	NA	NA	NA	NA	NA	NA
OBP	OBP_to_OB2	Nup37	FALSE	9.1e-06	0.000244361	19.6916	-0.976387	NA	NA	NA	NA	NA	NA	NA	NA	NA
OBP	OBP_to_OB2	Nup43	FALSE	3.64e-07	1.27e-05	25.8744	-1.16364	NA	NA	NA	NA	NA	NA	NA	NA	NA
OBP	OBP_to_OB2	Nup85	FALSE	1.71e-06	5.38e-05	22.8932	-0.935627	NA	NA	NA	NA	NA	NA	NA	NA	NA
OBP	OBP_to_OB2	Nup93	FALSE	0.00209794	0.0322083	9.46181	-0.793325	NA	NA	NA	NA	NA	NA	NA	NA	NA
OBP	OBP_to_OB2	Nupr1	FALSE	2.47e-12	1.87e-10	49.0667	0.81453	NA	NA	NA	NA	NA	NA	NA	NA	NA
OBP	OBP_to_OB2	Nusap1	FALSE	2.08e-07	7.64e-06	26.9561	-2.01775	NA	NA	NA	NA	NA	NA	NA	NA	NA
OBP	OBP_to_OB2	Oaf	FALSE	0.000206679	0.00413566	13.7694	-0.90679	NA	NA	NA	NA	NA	NA	NA	NA	NA
OBP	OBP_to_OB2	Ociad2	FALSE	0.00283539	0.0419942	8.91048	0.991826	NA	NA	NA	NA	NA	NA	NA	NA	NA
OBP	OBP_to_OB2	Ogdhl	FALSE	0.000643063	0.0113674	11.647	-2.25163	NA	NA	NA	NA	NA	NA	NA	NA	NA
OBP	OBP_to_OB2	Ogfrl1	FALSE	0.00121508	0.0198264	10.4673	-0.8125	NA	NA	NA	NA	NA	NA	NA	NA	NA
OBP	OBP_to_OB2	Ogn	FALSE	0	0	240.889	-1.92328	NA	NA	NA	NA	NA	NA	NA	NA	NA
OBP	OBP_to_OB2	Oip5	FALSE	3.81e-05	0.000900087	16.964	-1.77811	NA	NA	NA	NA	NA	NA	NA	NA	NA
OBP	OBP_to_OB2	Ola1	FALSE	0.00204304	0.0314983	9.51046	-0.548738	NA	NA	NA	NA	NA	NA	NA	NA	NA
OBP	OBP_to_OB2	Olfm1	FALSE	3.2e-09	1.54e-07	35.0569	-1.36287	NA	NA	NA	NA	NA	NA	NA	NA	NA
OBP	OBP_to_OB2	Olfml2a	FALSE	9.5e-10	4.99e-08	37.4245	-2.08111	NA	NA	NA	NA	NA	NA	NA	NA	NA
OBP	OBP_to_OB2	Olfml2b	FALSE	0	0	230.913	-2.10009	NA	NA	NA	NA	NA	NA	NA	NA	NA
OBP	OBP_to_OB2	Omd	FALSE	0	0	97.1934	-1.55159	NA	NA	NA	NA	NA	NA	NA	NA	NA
OBP	OBP_to_OB2	Orc6	FALSE	5.69e-13	4.65e-11	51.9513	-1.22569	NA	NA	NA	NA	NA	NA	NA	NA	NA
OBP	OBP_to_OB2	Ormdl3	FALSE	2.98e-05	0.000721777	17.4312	0.618182	NA	NA	NA	NA	NA	NA	NA	NA	NA
OBP	OBP_to_OB2	Ost4	FALSE	0.000326258	0.00621549	12.9133	0.505763	NA	NA	NA	NA	NA	NA	NA	NA	NA
OBP	OBP_to_OB2	P3h1	FALSE	2.06e-12	1.58e-10	49.4234	0.810455	NA	NA	NA	NA	NA	NA	NA	NA	NA
OBP	OBP_to_OB2	P3h4	FALSE	0	0	90.7623	0.941557	NA	NA	NA	NA	NA	NA	NA	NA	NA
OBP	OBP_to_OB2	P4ha1	FALSE	0	0	107.09	1.07614	NA	NA	NA	NA	NA	NA	NA	NA	NA
OBP	OBP_to_OB2	P4ha2	FALSE	3.82e-08	1.6e-06	30.238	0.716892	NA	NA	NA	NA	NA	NA	NA	NA	NA
OBP	OBP_to_OB2	P4ha3	FALSE	4.21e-12	3.15e-10	48.0222	-1.9607	NA	NA	NA	NA	NA	NA	NA	NA	NA
OBP	OBP_to_OB2	P4hb	FALSE	0	0	86.7082	0.80833	NA	NA	NA	NA	NA	NA	NA	NA	NA
OBP	OBP_to_OB2	Pa2g4	FALSE	2.22e-16	2.54e-14	67.8052	-0.9391	NA	NA	NA	NA	NA	NA	NA	NA	NA
OBP	OBP_to_OB2	Paics	FALSE	2.02e-13	1.76e-11	53.9867	-0.949433	NA	NA	NA	NA	NA	NA	NA	NA	NA
OBP	OBP_to_OB2	Pak3	FALSE	0.0011348	0.0187396	10.5936	-0.796801	NA	NA	NA	NA	NA	NA	NA	NA	NA
OBP	OBP_to_OB2	Palld	FALSE	0	0	105.951	-1.11524	NA	NA	NA	NA	NA	NA	NA	NA	NA
OBP	OBP_to_OB2	Palm	FALSE	0.000183577	0.0037385	13.9921	-0.900805	NA	NA	NA	NA	NA	NA	NA	NA	NA
OBP	OBP_to_OB2	Palm3	FALSE	0.00065793	0.011574	11.6045	-2.47407	NA	NA	NA	NA	NA	NA	NA	NA	NA
OBP	OBP_to_OB2	Pappa	FALSE	0	0	193.377	-2.83296	NA	NA	NA	NA	NA	NA	NA	NA	NA
OBP	OBP_to_OB2	Pappa2	FALSE	1.58e-12	1.23e-10	49.9511	-1.93128	NA	NA	NA	NA	NA	NA	NA	NA	NA
OBP	OBP_to_OB2	Paqr9	FALSE	1.83e-06	5.7e-05	22.7704	2.35773	NA	NA	NA	NA	NA	NA	NA	NA	NA
OBP	OBP_to_OB2	Parp3	FALSE	5.65e-08	2.31e-06	29.4792	-0.98688	NA	NA	NA	NA	NA	NA	NA	NA	NA
OBP	OBP_to_OB2	Parpbp	FALSE	1.52e-05	0.000391859	18.7141	-2.18389	NA	NA	NA	NA	NA	NA	NA	NA	NA
OBP	OBP_to_OB2	Pbk	FALSE	4.54e-05	0.00105728	16.63	-1.4908	NA	NA	NA	NA	NA	NA	NA	NA	NA
OBP	OBP_to_OB2	Pcbp4	FALSE	0.0020583	0.0316665	9.4968	-0.710107	NA	NA	NA	NA	NA	NA	NA	NA	NA
OBP	OBP_to_OB2	Pcdh19	FALSE	0.000938311	0.0158793	10.9455	-1.12386	NA	NA	NA	NA	NA	NA	NA	NA	NA
OBP	OBP_to_OB2	Pcdh7	FALSE	6.27e-06	0.000174232	20.403	0.846333	NA	NA	NA	NA	NA	NA	NA	NA	NA
OBP	OBP_to_OB2	Pck2	FALSE	1.99e-10	1.19e-08	40.4754	0.860447	NA	NA	NA	NA	NA	NA	NA	NA	NA
OBP	OBP_to_OB2	Pclaf	FALSE	4.7e-13	3.89e-11	52.325	-2.1235	NA	NA	NA	NA	NA	NA	NA	NA	NA
OBP	OBP_to_OB2	Pcolce2	FALSE	0	0	72.6086	1.57269	NA	NA	NA	NA	NA	NA	NA	NA	NA
OBP	OBP_to_OB2	Pcp4	FALSE	8.68e-08	3.44e-06	28.6485	2.29753	NA	NA	NA	NA	NA	NA	NA	NA	NA
OBP	OBP_to_OB2	Pcp4l1	FALSE	2.86e-05	0.000695556	17.5101	-1.99252	NA	NA	NA	NA	NA	NA	NA	NA	NA
OBP	OBP_to_OB2	Pcsk6	FALSE	0	0	330.843	2.07718	NA	NA	NA	NA	NA	NA	NA	NA	NA
OBP	OBP_to_OB2	Pde3a	FALSE	2.15e-06	6.64e-05	22.4545	-1.9777	NA	NA	NA	NA	NA	NA	NA	NA	NA
OBP	OBP_to_OB2	Pde5a	FALSE	5.06e-05	0.0011706	16.4248	-0.988899	NA	NA	NA	NA	NA	NA	NA	NA	NA
OBP	OBP_to_OB2	Pdgfa	FALSE	1.95e-09	9.72e-08	36.0264	-0.806479	NA	NA	NA	NA	NA	NA	NA	NA	NA
OBP	OBP_to_OB2	Pdgfd	FALSE	1.72e-07	6.39e-06	27.3295	0.962283	NA	NA	NA	NA	NA	NA	NA	NA	NA
OBP	OBP_to_OB2	Pdgfrb	FALSE	0	0	128.5	-1.5434	NA	NA	NA	NA	NA	NA	NA	NA	NA
OBP	OBP_to_OB2	Pdgfrl	FALSE	0	0	109.776	1.40771	NA	NA	NA	NA	NA	NA	NA	NA	NA
OBP	OBP_to_OB2	Pdlim1	FALSE	2.01e-14	1.87e-12	58.5275	-1.55025	NA	NA	NA	NA	NA	NA	NA	NA	NA
OBP	OBP_to_OB2	Pdlim2	FALSE	4.01e-11	2.62e-09	43.611	-0.968663	NA	NA	NA	NA	NA	NA	NA	NA	NA
OBP	OBP_to_OB2	Pdlim4	FALSE	8.92e-07	2.92e-05	24.1478	-0.825587	NA	NA	NA	NA	NA	NA	NA	NA	NA
OBP	OBP_to_OB2	Pdlim5	FALSE	0	0	93.5934	-1.07211	NA	NA	NA	NA	NA	NA	NA	NA	NA
OBP	OBP_to_OB2	Pdlim7	FALSE	8.44e-06	0.000228088	19.8351	-0.690547	NA	NA	NA	NA	NA	NA	NA	NA	NA
OBP	OBP_to_OB2	Pea15a	FALSE	7.35e-09	3.34e-07	33.4395	-1.19261	NA	NA	NA	NA	NA	NA	NA	NA	NA
OBP	OBP_to_OB2	Pgam2	FALSE	5.09e-09	2.38e-07	34.1555	1.97403	NA	NA	NA	NA	NA	NA	NA	NA	NA
OBP	OBP_to_OB2	Pgbd5	FALSE	0.000412736	0.00766193	12.4736	1.32225	NA	NA	NA	NA	NA	NA	NA	NA	NA
OBP	OBP_to_OB2	Pgf	FALSE	4.27e-13	3.57e-11	52.514	-1.78708	NA	NA	NA	NA	NA	NA	NA	NA	NA
OBP	OBP_to_OB2	Phactr2	FALSE	2.9e-10	1.67e-08	39.7434	-1.39637	NA	NA	NA	NA	NA	NA	NA	NA	NA
OBP	OBP_to_OB2	Phex	FALSE	0	0	130.507	2.06163	NA	NA	NA	NA	NA	NA	NA	NA	NA
OBP	OBP_to_OB2	Phf10	FALSE	0.00105398	0.0175244	10.7302	0.563492	NA	NA	NA	NA	NA	NA	NA	NA	NA
OBP	OBP_to_OB2	Phf6	FALSE	6.13e-06	0.000170876	20.4475	-0.951284	NA	NA	NA	NA	NA	NA	NA	NA	NA
OBP	OBP_to_OB2	Phlda3	FALSE	0	0	78.1152	-0.994277	NA	NA	NA	NA	NA	NA	NA	NA	NA
OBP	OBP_to_OB2	Phldb2	FALSE	0	0	144.004	-2.04514	NA	NA	NA	NA	NA	NA	NA	NA	NA
OBP	OBP_to_OB2	Pi15	FALSE	2.34e-05	0.000580915	17.889	-2.62919	NA	NA	NA	NA	NA	NA	NA	NA	NA
OBP	OBP_to_OB2	Pick1	FALSE	0.000459198	0.00844545	12.2745	0.827519	NA	NA	NA	NA	NA	NA	NA	NA	NA
OBP	OBP_to_OB2	Pik3r1	FALSE	4.44e-16	4.97e-14	65.8284	-1.1012	NA	NA	NA	NA	NA	NA	NA	NA	NA
OBP	OBP_to_OB2	Pim2	FALSE	1.75e-05	0.000447778	18.4397	0.716126	NA	NA	NA	NA	NA	NA	NA	NA	NA
OBP	OBP_to_OB2	Pimreg	FALSE	3.28e-06	9.66e-05	21.6434	-1.67705	NA	NA	NA	NA	NA	NA	NA	NA	NA
OBP	OBP_to_OB2	Pinx1	FALSE	3.06e-05	0.000737798	17.379	-1.0234	NA	NA	NA	NA	NA	NA	NA	NA	NA
OBP	OBP_to_OB2	Pir	FALSE	0.000234872	0.00461936	13.5293	-0.850724	NA	NA	NA	NA	NA	NA	NA	NA	NA
OBP	OBP_to_OB2	Pitrm1	FALSE	2.44e-07	8.85e-06	26.6462	-0.907939	NA	NA	NA	NA	NA	NA	NA	NA	NA
OBP	OBP_to_OB2	Pkmyt1	FALSE	9.51e-07	3.1e-05	24.0253	-1.70634	NA	NA	NA	NA	NA	NA	NA	NA	NA
OBP	OBP_to_OB2	Pkp2	FALSE	6.12e-06	0.000170876	20.4492	-1.74999	NA	NA	NA	NA	NA	NA	NA	NA	NA
OBP	OBP_to_OB2	Pkp4	FALSE	0.00153375	0.0244226	10.0376	0.728855	NA	NA	NA	NA	NA	NA	NA	NA	NA
OBP	OBP_to_OB2	Pla1a	FALSE	0.00063901	0.0113049	11.6588	-1.50035	NA	NA	NA	NA	NA	NA	NA	NA	NA
OBP	OBP_to_OB2	Pla2g16	FALSE	5.55e-16	6.15e-14	65.6946	-1.15954	NA	NA	NA	NA	NA	NA	NA	NA	NA
OBP	OBP_to_OB2	Pla2g5	FALSE	0.0013744	0.022111	10.2398	1.87933	NA	NA	NA	NA	NA	NA	NA	NA	NA
OBP	OBP_to_OB2	Plac8	FALSE	0.000614909	0.0109228	11.7303	-1.63481	NA	NA	NA	NA	NA	NA	NA	NA	NA
OBP	OBP_to_OB2	Plagl1	FALSE	0.000494633	0.00900612	12.1358	-0.847895	NA	NA	NA	NA	NA	NA	NA	NA	NA
OBP	OBP_to_OB2	Plat	FALSE	0.000412623	0.00766193	12.4741	-1.18137	NA	NA	NA	NA	NA	NA	NA	NA	NA
OBP	OBP_to_OB2	Plcb1	FALSE	0.00029883	0.00571759	13.0777	-1.02159	NA	NA	NA	NA	NA	NA	NA	NA	NA
OBP	OBP_to_OB2	Plcb4	FALSE	0.000326277	0.00621549	12.9132	-1.12665	NA	NA	NA	NA	NA	NA	NA	NA	NA
OBP	OBP_to_OB2	Plce1	FALSE	1.81e-07	6.71e-06	27.228	-1.47249	NA	NA	NA	NA	NA	NA	NA	NA	NA
OBP	OBP_to_OB2	Plec	FALSE	2.59e-06	7.83e-05	22.0961	-0.752808	NA	NA	NA	NA	NA	NA	NA	NA	NA
OBP	OBP_to_OB2	Plekhg4	FALSE	6.82e-07	2.28e-05	24.666	-1.73514	NA	NA	NA	NA	NA	NA	NA	NA	NA
OBP	OBP_to_OB2	Plekhj1	FALSE	0.00122764	0.0199797	10.4483	-0.630796	NA	NA	NA	NA	NA	NA	NA	NA	NA
OBP	OBP_to_OB2	Plin4	FALSE	9.95e-05	0.0021454	15.1471	-1.86443	NA	NA	NA	NA	NA	NA	NA	NA	NA
OBP	OBP_to_OB2	Plk1	FALSE	1.31e-05	0.000343502	19.0018	-1.57372	NA	NA	NA	NA	NA	NA	NA	NA	NA
OBP	OBP_to_OB2	Plk4	FALSE	1.24e-05	0.000326923	19.1008	-1.10776	NA	NA	NA	NA	NA	NA	NA	NA	NA
OBP	OBP_to_OB2	Plod1	FALSE	0.000200633	0.00403689	13.8251	0.615957	NA	NA	NA	NA	NA	NA	NA	NA	NA
OBP	OBP_to_OB2	Plod2	FALSE	0	0	75.7126	0.83419	NA	NA	NA	NA	NA	NA	NA	NA	NA
OBP	OBP_to_OB2	Plp2	FALSE	2.21e-06	6.77e-05	22.4037	-0.753258	NA	NA	NA	NA	NA	NA	NA	NA	NA
OBP	OBP_to_OB2	Plpp1	FALSE	0.00208018	0.031958	9.47741	0.711579	NA	NA	NA	NA	NA	NA	NA	NA	NA
OBP	OBP_to_OB2	Plpp3	FALSE	3.63e-06	0.00010546	21.452	-1.092	NA	NA	NA	NA	NA	NA	NA	NA	NA
OBP	OBP_to_OB2	Plppr4	FALSE	2.77e-10	1.61e-08	39.8298	3.21795	NA	NA	NA	NA	NA	NA	NA	NA	NA
OBP	OBP_to_OB2	Plscr4	FALSE	0.000484245	0.00883909	12.1754	-1.10511	NA	NA	NA	NA	NA	NA	NA	NA	NA
OBP	OBP_to_OB2	Plxdc2	FALSE	0	0	105.345	-2.00565	NA	NA	NA	NA	NA	NA	NA	NA	NA
OBP	OBP_to_OB2	Plxna2	FALSE	1.05e-11	7.52e-10	46.2311	-1.5002	NA	NA	NA	NA	NA	NA	NA	NA	NA
OBP	OBP_to_OB2	Plxna4	FALSE	0.000221176	0.00438954	13.642	1.67042	NA	NA	NA	NA	NA	NA	NA	NA	NA
OBP	OBP_to_OB2	Plxnd1	FALSE	0.000390371	0.00730891	12.5777	-0.937652	NA	NA	NA	NA	NA	NA	NA	NA	NA
OBP	OBP_to_OB2	Pmf1	FALSE	0.000174984	0.00357686	14.0823	-0.783789	NA	NA	NA	NA	NA	NA	NA	NA	NA
OBP	OBP_to_OB2	Pmm1	FALSE	0.00272406	0.0405655	8.98365	-0.620517	NA	NA	NA	NA	NA	NA	NA	NA	NA
OBP	OBP_to_OB2	Pnck	FALSE	2.61e-07	9.39e-06	26.515	-1.73305	NA	NA	NA	NA	NA	NA	NA	NA	NA
OBP	OBP_to_OB2	Pnn	FALSE	0.000730378	0.0127051	11.4103	-0.643077	NA	NA	NA	NA	NA	NA	NA	NA	NA
OBP	OBP_to_OB2	Pnpla8	FALSE	0.000760341	0.0131634	11.3356	0.524317	NA	NA	NA	NA	NA	NA	NA	NA	NA
OBP	OBP_to_OB2	Poc1a	FALSE	0.000589638	0.0105379	11.8084	-1.13656	NA	NA	NA	NA	NA	NA	NA	NA	NA
OBP	OBP_to_OB2	Podnl1	FALSE	0	0	100.601	-1.64166	NA	NA	NA	NA	NA	NA	NA	NA	NA
OBP	OBP_to_OB2	Pola1	FALSE	1.12e-07	4.31e-06	28.1607	-1.42535	NA	NA	NA	NA	NA	NA	NA	NA	NA
OBP	OBP_to_OB2	Pold1	FALSE	2.07e-07	7.62e-06	26.9636	-1.44936	NA	NA	NA	NA	NA	NA	NA	NA	NA
OBP	OBP_to_OB2	Polk	FALSE	2.7e-11	1.8e-09	44.383	-1.1359	NA	NA	NA	NA	NA	NA	NA	NA	NA
OBP	OBP_to_OB2	Porcn	FALSE	0.00055895	0.0100565	11.9079	-0.735638	NA	NA	NA	NA	NA	NA	NA	NA	NA
OBP	OBP_to_OB2	Postn	FALSE	0	0	73.5734	-1.57351	NA	NA	NA	NA	NA	NA	NA	NA	NA
OBP	OBP_to_OB2	Ppan	FALSE	0.000198694	0.00400156	13.8434	-0.768007	NA	NA	NA	NA	NA	NA	NA	NA	NA
OBP	OBP_to_OB2	Pparg	FALSE	1.85e-08	8.04e-07	31.6439	-1.38052	NA	NA	NA	NA	NA	NA	NA	NA	NA
OBP	OBP_to_OB2	Ppfia2	FALSE	7.84e-07	2.6e-05	24.3974	1.46242	NA	NA	NA	NA	NA	NA	NA	NA	NA
OBP	OBP_to_OB2	Ppfibp1	FALSE	0.00196525	0.0304712	9.58171	-0.531106	NA	NA	NA	NA	NA	NA	NA	NA	NA
OBP	OBP_to_OB2	Ppfibp2	FALSE	0.000147297	0.00306252	14.4064	-0.861483	NA	NA	NA	NA	NA	NA	NA	NA	NA
OBP	OBP_to_OB2	Ppia	FALSE	0.00088751	0.015077	11.0487	-0.47942	NA	NA	NA	NA	NA	NA	NA	NA	NA
OBP	OBP_to_OB2	Ppid	FALSE	2.76e-09	1.34e-07	35.343	-0.908079	NA	NA	NA	NA	NA	NA	NA	NA	NA
OBP	OBP_to_OB2	Ppih	FALSE	0.000867357	0.0148163	11.0913	-0.675476	NA	NA	NA	NA	NA	NA	NA	NA	NA
OBP	OBP_to_OB2	Ppm1n	FALSE	1.47e-05	0.000380786	18.7824	1.3088	NA	NA	NA	NA	NA	NA	NA	NA	NA
OBP	OBP_to_OB2	Ppp1r12a	FALSE	2.93e-07	1.03e-05	26.2984	-0.683599	NA	NA	NA	NA	NA	NA	NA	NA	NA
OBP	OBP_to_OB2	Ppp1r12b	FALSE	0.000230442	0.00455121	13.565	-0.987321	NA	NA	NA	NA	NA	NA	NA	NA	NA
OBP	OBP_to_OB2	Ppp1r1a	FALSE	0.000645575	0.0113841	11.6397	-1.68291	NA	NA	NA	NA	NA	NA	NA	NA	NA
OBP	OBP_to_OB2	Ppp2r5a	FALSE	6.74e-06	0.000185362	20.2652	0.587052	NA	NA	NA	NA	NA	NA	NA	NA	NA
OBP	OBP_to_OB2	Pqlc3	FALSE	3.87e-06	0.000111571	21.3288	-0.98429	NA	NA	NA	NA	NA	NA	NA	NA	NA
OBP	OBP_to_OB2	Prc1	FALSE	9.33e-11	5.82e-09	41.9569	-2.13044	NA	NA	NA	NA	NA	NA	NA	NA	NA
OBP	OBP_to_OB2	Prelp	FALSE	1.06e-13	9.48e-12	55.2464	-1.71913	NA	NA	NA	NA	NA	NA	NA	NA	NA
OBP	OBP_to_OB2	Prex1	FALSE	0	0	103.045	1.8419	NA	NA	NA	NA	NA	NA	NA	NA	NA
OBP	OBP_to_OB2	Prim1	FALSE	3.56e-10	2.01e-08	39.3405	-1.72842	NA	NA	NA	NA	NA	NA	NA	NA	NA
OBP	OBP_to_OB2	Prim2	FALSE	0.00205279	0.0316264	9.50172	-0.876364	NA	NA	NA	NA	NA	NA	NA	NA	NA
OBP	OBP_to_OB2	Prkar2b	FALSE	1.11e-16	1.3e-14	68.3893	-1.72331	NA	NA	NA	NA	NA	NA	NA	NA	NA
OBP	OBP_to_OB2	Prkd3	FALSE	1.7e-05	0.00043444	18.504	-0.762815	NA	NA	NA	NA	NA	NA	NA	NA	NA
OBP	OBP_to_OB2	Prmt1	FALSE	8.57e-08	3.42e-06	28.6717	-0.740496	NA	NA	NA	NA	NA	NA	NA	NA	NA
OBP	OBP_to_OB2	Pros1	FALSE	3.33e-11	2.19e-09	43.9712	-0.971187	NA	NA	NA	NA	NA	NA	NA	NA	NA
OBP	OBP_to_OB2	Prpf38a	FALSE	0.0019936	0.0308632	9.55542	-0.61408	NA	NA	NA	NA	NA	NA	NA	NA	NA
OBP	OBP_to_OB2	Prr11	FALSE	3.17e-06	9.43e-05	21.711	-1.98576	NA	NA	NA	NA	NA	NA	NA	NA	NA
OBP	OBP_to_OB2	Prr15	FALSE	6.01e-06	0.000168488	20.4843	1.44777	NA	NA	NA	NA	NA	NA	NA	NA	NA
OBP	OBP_to_OB2	Prr7	FALSE	3.79e-06	0.00010969	21.3665	-0.887664	NA	NA	NA	NA	NA	NA	NA	NA	NA
OBP	OBP_to_OB2	Prrx1	FALSE	0	0	75.0705	-0.885043	NA	NA	NA	NA	NA	NA	NA	NA	NA
OBP	OBP_to_OB2	Prrx2	FALSE	0	0	82.8397	-1.29842	NA	NA	NA	NA	NA	NA	NA	NA	NA
OBP	OBP_to_OB2	Prss23	FALSE	0	0	260.087	-2.7601	NA	NA	NA	NA	NA	NA	NA	NA	NA
OBP	OBP_to_OB2	Prss35	FALSE	1.27e-07	4.84e-06	27.9179	0.902455	NA	NA	NA	NA	NA	NA	NA	NA	NA
OBP	OBP_to_OB2	Prss46	FALSE	0.000494491	0.00900612	12.1363	-1.43925	NA	NA	NA	NA	NA	NA	NA	NA	NA
OBP	OBP_to_OB2	Psat1	FALSE	7.63e-06	0.000207768	20.0277	0.720509	NA	NA	NA	NA	NA	NA	NA	NA	NA
OBP	OBP_to_OB2	Psd4	FALSE	4.8e-08	1.98e-06	29.7968	-1.35567	NA	NA	NA	NA	NA	NA	NA	NA	NA
OBP	OBP_to_OB2	Psme4	FALSE	0.00241958	0.0364792	9.20043	0.56715	NA	NA	NA	NA	NA	NA	NA	NA	NA
OBP	OBP_to_OB2	Psmg2	FALSE	5.61e-05	0.0012803	16.2311	-0.749474	NA	NA	NA	NA	NA	NA	NA	NA	NA
OBP	OBP_to_OB2	Pten	FALSE	8.4e-13	6.74e-11	51.1869	-0.800402	NA	NA	NA	NA	NA	NA	NA	NA	NA
OBP	OBP_to_OB2	Ptges3	FALSE	6.39e-09	2.92e-07	33.7125	-0.674326	NA	NA	NA	NA	NA	NA	NA	NA	NA
OBP	OBP_to_OB2	Ptgfr	FALSE	1.13e-14	1.08e-12	59.6529	-2.47465	NA	NA	NA	NA	NA	NA	NA	NA	NA
OBP	OBP_to_OB2	Ptgr1	FALSE	2.99e-07	1.05e-05	26.2561	-1.03908	NA	NA	NA	NA	NA	NA	NA	NA	NA
OBP	OBP_to_OB2	Pth1r	FALSE	1.46e-05	0.000380786	18.7837	-0.614509	NA	NA	NA	NA	NA	NA	NA	NA	NA
OBP	OBP_to_OB2	Ptk7	FALSE	2.29e-10	1.35e-08	40.2033	-0.8827	NA	NA	NA	NA	NA	NA	NA	NA	NA
OBP	OBP_to_OB2	Ptma	FALSE	6.9e-09	3.14e-07	33.5626	-0.615611	NA	NA	NA	NA	NA	NA	NA	NA	NA
OBP	OBP_to_OB2	Ptms	FALSE	7.65e-10	4.13e-08	37.8464	-0.638385	NA	NA	NA	NA	NA	NA	NA	NA	NA
OBP	OBP_to_OB2	Ptn	FALSE	1.51e-07	5.69e-06	27.5784	-2.47605	NA	NA	NA	NA	NA	NA	NA	NA	NA
OBP	OBP_to_OB2	Ptpn13	FALSE	6.21e-05	0.00140359	16.0373	-0.81231	NA	NA	NA	NA	NA	NA	NA	NA	NA
OBP	OBP_to_OB2	Ptpn14	FALSE	0.00181105	0.0282811	9.73182	-0.570783	NA	NA	NA	NA	NA	NA	NA	NA	NA
OBP	OBP_to_OB2	Ptpn4	FALSE	0.00014206	0.00296776	14.4746	0.758737	NA	NA	NA	NA	NA	NA	NA	NA	NA
OBP	OBP_to_OB2	Ptprd	FALSE	9.55e-05	0.00207653	15.2237	-0.613919	NA	NA	NA	NA	NA	NA	NA	NA	NA
OBP	OBP_to_OB2	Ptprk	FALSE	0.000138228	0.00290159	14.5261	0.777107	NA	NA	NA	NA	NA	NA	NA	NA	NA
OBP	OBP_to_OB2	Ptprr	FALSE	0.000156745	0.0032435	14.2894	2.18526	NA	NA	NA	NA	NA	NA	NA	NA	NA
OBP	OBP_to_OB2	Ptprs	FALSE	7.92e-07	2.62e-05	24.3769	0.675175	NA	NA	NA	NA	NA	NA	NA	NA	NA
OBP	OBP_to_OB2	Ptprz1	FALSE	0	0	95.1616	1.32809	NA	NA	NA	NA	NA	NA	NA	NA	NA
OBP	OBP_to_OB2	Ptrh1	FALSE	4.84e-06	0.00013706	20.8994	-1.02416	NA	NA	NA	NA	NA	NA	NA	NA	NA
OBP	OBP_to_OB2	Pttg1	FALSE	1.01e-08	4.53e-07	32.8252	-1.44974	NA	NA	NA	NA	NA	NA	NA	NA	NA
OBP	OBP_to_OB2	Ptx3	FALSE	0	0	170.89	-2.63213	NA	NA	NA	NA	NA	NA	NA	NA	NA
OBP	OBP_to_OB2	Pxdn	FALSE	0.00109382	0.018104	10.6616	-1.37253	NA	NA	NA	NA	NA	NA	NA	NA	NA
OBP	OBP_to_OB2	Pycr1	FALSE	1.06e-07	4.09e-06	28.2688	0.892223	NA	NA	NA	NA	NA	NA	NA	NA	NA
OBP	OBP_to_OB2	Rab11fip4	FALSE	7.26e-10	3.93e-08	37.9508	2.43802	NA	NA	NA	NA	NA	NA	NA	NA	NA
OBP	OBP_to_OB2	Rab23	FALSE	2.31e-05	0.00057372	17.9171	-0.97398	NA	NA	NA	NA	NA	NA	NA	NA	NA
OBP	OBP_to_OB2	Rabac1	FALSE	0	0	71.4305	0.751311	NA	NA	NA	NA	NA	NA	NA	NA	NA
OBP	OBP_to_OB2	Rac3	FALSE	7.29e-12	5.29e-10	46.947	-1.43575	NA	NA	NA	NA	NA	NA	NA	NA	NA
OBP	OBP_to_OB2	Racgap1	FALSE	2.21e-10	1.31e-08	40.2746	-1.84914	NA	NA	NA	NA	NA	NA	NA	NA	NA
OBP	OBP_to_OB2	Rad50	FALSE	0.000524817	0.00950811	12.0254	-0.773057	NA	NA	NA	NA	NA	NA	NA	NA	NA
OBP	OBP_to_OB2	Rad51	FALSE	3.73e-07	1.3e-05	25.8316	-1.83777	NA	NA	NA	NA	NA	NA	NA	NA	NA
OBP	OBP_to_OB2	Rad51ap1	FALSE	1.94e-06	6.04e-05	22.6525	-1.63003	NA	NA	NA	NA	NA	NA	NA	NA	NA
OBP	OBP_to_OB2	Rad51ap2	FALSE	1.01e-06	3.26e-05	23.9153	1.79159	NA	NA	NA	NA	NA	NA	NA	NA	NA
OBP	OBP_to_OB2	Rad54l	FALSE	3.31e-06	9.73e-05	21.6269	-1.89389	NA	NA	NA	NA	NA	NA	NA	NA	NA
OBP	OBP_to_OB2	Raet1e	FALSE	0.00289219	0.0427485	8.87426	-2.42498	NA	NA	NA	NA	NA	NA	NA	NA	NA
OBP	OBP_to_OB2	Rai14	FALSE	7.99e-08	3.22e-06	28.8091	-0.898976	NA	NA	NA	NA	NA	NA	NA	NA	NA
OBP	OBP_to_OB2	Ralgps2	FALSE	2.84e-08	1.21e-06	30.812	1.74638	NA	NA	NA	NA	NA	NA	NA	NA	NA
OBP	OBP_to_OB2	Ramp1	FALSE	0.0003952	0.00737404	12.5547	0.595532	NA	NA	NA	NA	NA	NA	NA	NA	NA
OBP	OBP_to_OB2	Ran	FALSE	2.83e-14	2.58e-12	57.8482	-0.763915	NA	NA	NA	NA	NA	NA	NA	NA	NA
OBP	OBP_to_OB2	Ranbp1	FALSE	1.39e-05	0.000363742	18.8857	-0.621475	NA	NA	NA	NA	NA	NA	NA	NA	NA
OBP	OBP_to_OB2	Rangap1	FALSE	0.000200989	0.00404032	13.8218	-0.781591	NA	NA	NA	NA	NA	NA	NA	NA	NA
OBP	OBP_to_OB2	Rangrf	FALSE	0.000568167	0.0102004	11.8775	-0.792818	NA	NA	NA	NA	NA	NA	NA	NA	NA
OBP	OBP_to_OB2	Raph1	FALSE	5.89e-05	0.0013405	16.1362	-0.658272	NA	NA	NA	NA	NA	NA	NA	NA	NA
OBP	OBP_to_OB2	Rasgrp2	FALSE	0.000430195	0.00794542	12.3963	-0.80277	NA	NA	NA	NA	NA	NA	NA	NA	NA
OBP	OBP_to_OB2	Rbbp7	FALSE	8.88e-16	9.5e-14	64.6834	-0.950029	NA	NA	NA	NA	NA	NA	NA	NA	NA
OBP	OBP_to_OB2	Rbm43	FALSE	2.8e-07	9.92e-06	26.3858	-1.37974	NA	NA	NA	NA	NA	NA	NA	NA	NA
OBP	OBP_to_OB2	Rbms1	FALSE	0.00311134	0.0455811	8.741	-0.537991	NA	NA	NA	NA	NA	NA	NA	NA	NA
OBP	OBP_to_OB2	Rbms3	FALSE	6.57e-10	3.57e-08	38.1454	-0.870611	NA	NA	NA	NA	NA	NA	NA	NA	NA
OBP	OBP_to_OB2	Rbp4	FALSE	0.000416191	0.00771951	12.4581	0.684434	NA	NA	NA	NA	NA	NA	NA	NA	NA
OBP	OBP_to_OB2	Rbpms	FALSE	1.31e-06	4.2e-05	23.4046	-0.968458	NA	NA	NA	NA	NA	NA	NA	NA	NA
OBP	OBP_to_OB2	Rbpms2	FALSE	0.00146077	0.023397	10.1275	-0.98856	NA	NA	NA	NA	NA	NA	NA	NA	NA
OBP	OBP_to_OB2	Rcan2	FALSE	0	0	73.4554	-2.47412	NA	NA	NA	NA	NA	NA	NA	NA	NA
OBP	OBP_to_OB2	Rcn3	FALSE	0	0	71.1377	0.783289	NA	NA	NA	NA	NA	NA	NA	NA	NA
OBP	OBP_to_OB2	Reck	FALSE	8.76e-06	0.00023608	19.7645	-1.02045	NA	NA	NA	NA	NA	NA	NA	NA	NA
OBP	OBP_to_OB2	Rem1	FALSE	2.04e-06	6.3e-05	22.5607	-2.65963	NA	NA	NA	NA	NA	NA	NA	NA	NA
OBP	OBP_to_OB2	Rerg	FALSE	1.59e-14	1.49e-12	58.9924	1.23273	NA	NA	NA	NA	NA	NA	NA	NA	NA
OBP	OBP_to_OB2	Ret	FALSE	0.000347141	0.00658423	12.7972	-1.14341	NA	NA	NA	NA	NA	NA	NA	NA	NA
OBP	OBP_to_OB2	Rfc3	FALSE	6.13e-06	0.000170876	20.4482	-0.994439	NA	NA	NA	NA	NA	NA	NA	NA	NA
OBP	OBP_to_OB2	Rfc4	FALSE	0.000882681	0.0150193	11.0588	-0.742411	NA	NA	NA	NA	NA	NA	NA	NA	NA
OBP	OBP_to_OB2	Rfc5	FALSE	0.00126584	0.0205462	10.3917	-0.812117	NA	NA	NA	NA	NA	NA	NA	NA	NA
OBP	OBP_to_OB2	Rftn1	FALSE	2e-15	2.06e-13	63.0584	-1.4665	NA	NA	NA	NA	NA	NA	NA	NA	NA
OBP	OBP_to_OB2	Rfxap	FALSE	0.000430554	0.00794542	12.3947	0.5795	NA	NA	NA	NA	NA	NA	NA	NA	NA
OBP	OBP_to_OB2	Rgs16	FALSE	0.00221471	0.0337872	9.36249	-0.769448	NA	NA	NA	NA	NA	NA	NA	NA	NA
OBP	OBP_to_OB2	Rgs17	FALSE	5.3e-08	2.17e-06	29.6045	-1.3462	NA	NA	NA	NA	NA	NA	NA	NA	NA
OBP	OBP_to_OB2	Rgs5	FALSE	2.33e-12	1.77e-10	49.1883	2.29344	NA	NA	NA	NA	NA	NA	NA	NA	NA
OBP	OBP_to_OB2	Rhobtb1	FALSE	6.57e-06	0.000181424	20.3159	0.787478	NA	NA	NA	NA	NA	NA	NA	NA	NA
OBP	OBP_to_OB2	Rhoj	FALSE	6.67e-13	5.4e-11	51.638	-1.36896	NA	NA	NA	NA	NA	NA	NA	NA	NA
OBP	OBP_to_OB2	Rhpn2	FALSE	8.29e-10	4.44e-08	37.6917	2.11808	NA	NA	NA	NA	NA	NA	NA	NA	NA
OBP	OBP_to_OB2	Ripk3	FALSE	3.5e-06	0.000102014	21.5209	-0.892557	NA	NA	NA	NA	NA	NA	NA	NA	NA
OBP	OBP_to_OB2	Ripor2	FALSE	0.000138876	0.0029124	14.5173	1.66505	NA	NA	NA	NA	NA	NA	NA	NA	NA
OBP	OBP_to_OB2	Rnase2a	FALSE	0.00175764	0.0275457	9.78685	1.0752	NA	NA	NA	NA	NA	NA	NA	NA	NA
OBP	OBP_to_OB2	Rnaseh2b	FALSE	0.000208874	0.00416813	13.7495	-0.76919	NA	NA	NA	NA	NA	NA	NA	NA	NA
OBP	OBP_to_OB2	Rnaset2a	FALSE	7.26e-10	3.93e-08	37.9484	0.97324	NA	NA	NA	NA	NA	NA	NA	NA	NA
OBP	OBP_to_OB2	Rnd3	FALSE	3.46e-06	0.00010091	21.5443	-0.69663	NA	NA	NA	NA	NA	NA	NA	NA	NA
OBP	OBP_to_OB2	Rnf144b	FALSE	2.63e-07	9.43e-06	26.5033	1.27075	NA	NA	NA	NA	NA	NA	NA	NA	NA
OBP	OBP_to_OB2	Robo2	FALSE	0	0	95.1821	2.3278	NA	NA	NA	NA	NA	NA	NA	NA	NA
OBP	OBP_to_OB2	Rock2	FALSE	0.000370911	0.00698651	12.6733	-0.577001	NA	NA	NA	NA	NA	NA	NA	NA	NA
OBP	OBP_to_OB2	Rom1	FALSE	4.49e-12	3.33e-10	47.9	1.56067	NA	NA	NA	NA	NA	NA	NA	NA	NA
OBP	OBP_to_OB2	Ror1	FALSE	1.6e-06	5.05e-05	23.0212	-2.30621	NA	NA	NA	NA	NA	NA	NA	NA	NA
OBP	OBP_to_OB2	Ror2	FALSE	0.00025997	0.00503585	13.3388	-0.914904	NA	NA	NA	NA	NA	NA	NA	NA	NA
OBP	OBP_to_OB2	Rpa1	FALSE	8.7e-09	3.93e-07	33.1127	-1.06802	NA	NA	NA	NA	NA	NA	NA	NA	NA
OBP	OBP_to_OB2	Rpf2	FALSE	9.47e-05	0.00206187	15.2389	-0.839522	NA	NA	NA	NA	NA	NA	NA	NA	NA
OBP	OBP_to_OB2	Rpgrip1l	FALSE	0.000920012	0.0155882	10.982	-0.791846	NA	NA	NA	NA	NA	NA	NA	NA	NA
OBP	OBP_to_OB2	Rpn2	FALSE	5.18e-08	2.13e-06	29.6477	0.592657	NA	NA	NA	NA	NA	NA	NA	NA	NA
OBP	OBP_to_OB2	Rpp38	FALSE	4.18e-05	0.000979426	16.7873	-1.08198	NA	NA	NA	NA	NA	NA	NA	NA	NA
OBP	OBP_to_OB2	Rpp40	FALSE	2.68e-07	9.55e-06	26.4689	-1.19057	NA	NA	NA	NA	NA	NA	NA	NA	NA
OBP	OBP_to_OB2	Rragd	FALSE	3.27e-05	0.000784597	17.2538	0.913747	NA	NA	NA	NA	NA	NA	NA	NA	NA
OBP	OBP_to_OB2	Rras	FALSE	8.57e-14	7.73e-12	55.6694	-1.06347	NA	NA	NA	NA	NA	NA	NA	NA	NA
OBP	OBP_to_OB2	Rrm1	FALSE	4.44e-16	4.97e-14	66.2531	-1.09331	NA	NA	NA	NA	NA	NA	NA	NA	NA
OBP	OBP_to_OB2	Rrm2	FALSE	1.44e-15	1.52e-13	63.6559	-1.94787	NA	NA	NA	NA	NA	NA	NA	NA	NA
OBP	OBP_to_OB2	Rrp15	FALSE	1.12e-05	0.000296042	19.2971	-0.814631	NA	NA	NA	NA	NA	NA	NA	NA	NA
OBP	OBP_to_OB2	Rrs1	FALSE	0.000690298	0.0120752	11.5152	-0.779579	NA	NA	NA	NA	NA	NA	NA	NA	NA
OBP	OBP_to_OB2	Rsl1d1	FALSE	8.99e-05	0.00197043	15.3379	-0.599977	NA	NA	NA	NA	NA	NA	NA	NA	NA
OBP	OBP_to_OB2	Rspo2	FALSE	1.5e-09	7.62e-08	36.529	-1.88516	NA	NA	NA	NA	NA	NA	NA	NA	NA
OBP	OBP_to_OB2	Rspo3	FALSE	6.04e-13	4.92e-11	51.8344	-2.5362	NA	NA	NA	NA	NA	NA	NA	NA	NA
OBP	OBP_to_OB2	Rsu1	FALSE	3.85e-10	2.15e-08	39.1897	-0.795831	NA	NA	NA	NA	NA	NA	NA	NA	NA
OBP	OBP_to_OB2	Rtkn2	FALSE	2.29e-13	1.96e-11	53.735	1.8731	NA	NA	NA	NA	NA	NA	NA	NA	NA
OBP	OBP_to_OB2	Runx1t1	FALSE	8.65e-05	0.00190285	15.4116	-1.33388	NA	NA	NA	NA	NA	NA	NA	NA	NA
OBP	OBP_to_OB2	Runx2	FALSE	0.00281635	0.0418256	8.92279	-0.542053	NA	NA	NA	NA	NA	NA	NA	NA	NA
OBP	OBP_to_OB2	Ruvbl1	FALSE	0.000720178	0.0125477	11.4364	-0.666365	NA	NA	NA	NA	NA	NA	NA	NA	NA
OBP	OBP_to_OB2	Ruvbl2	FALSE	0.000583436	0.0104402	11.8281	-0.785267	NA	NA	NA	NA	NA	NA	NA	NA	NA
OBP	OBP_to_OB2	S100a10	FALSE	4.19e-05	0.000979991	16.7841	-0.621657	NA	NA	NA	NA	NA	NA	NA	NA	NA
OBP	OBP_to_OB2	S100a11	FALSE	0	0	71.0272	-0.77784	NA	NA	NA	NA	NA	NA	NA	NA	NA
OBP	OBP_to_OB2	S100a4	FALSE	2.31e-11	1.56e-09	44.6864	-1.1603	NA	NA	NA	NA	NA	NA	NA	NA	NA
OBP	OBP_to_OB2	S100a6	FALSE	0	0	116.444	-1.18765	NA	NA	NA	NA	NA	NA	NA	NA	NA
OBP	OBP_to_OB2	S100b	FALSE	0	0	102.128	-2.95861	NA	NA	NA	NA	NA	NA	NA	NA	NA
OBP	OBP_to_OB2	S1pr1	FALSE	9.35e-08	3.68e-06	28.5045	-0.869104	NA	NA	NA	NA	NA	NA	NA	NA	NA
OBP	OBP_to_OB2	Sacs	FALSE	3.03e-05	0.000731665	17.3991	-1.00201	NA	NA	NA	NA	NA	NA	NA	NA	NA
OBP	OBP_to_OB2	Sae1	FALSE	1.26e-06	4.02e-05	23.4908	-0.764275	NA	NA	NA	NA	NA	NA	NA	NA	NA
OBP	OBP_to_OB2	Samd11	FALSE	2.8e-07	9.93e-06	26.3821	1.47131	NA	NA	NA	NA	NA	NA	NA	NA	NA
OBP	OBP_to_OB2	Sass6	FALSE	3.43e-05	0.000820098	17.1614	-1.29015	NA	NA	NA	NA	NA	NA	NA	NA	NA
OBP	OBP_to_OB2	Satb1	FALSE	1.94e-11	1.33e-09	45.0326	2.33852	NA	NA	NA	NA	NA	NA	NA	NA	NA
OBP	OBP_to_OB2	Scara3	FALSE	5.68e-08	2.32e-06	29.4683	-1.01501	NA	NA	NA	NA	NA	NA	NA	NA	NA
OBP	OBP_to_OB2	Scarb1	FALSE	7.71e-05	0.00170884	15.6279	0.703701	NA	NA	NA	NA	NA	NA	NA	NA	NA
OBP	OBP_to_OB2	Scarf2	FALSE	0.00101128	0.0169564	10.8068	-0.595004	NA	NA	NA	NA	NA	NA	NA	NA	NA
OBP	OBP_to_OB2	Scd1	FALSE	1.69e-06	5.32e-05	22.9219	0.750134	NA	NA	NA	NA	NA	NA	NA	NA	NA
OBP	OBP_to_OB2	Scn1a	FALSE	6.94e-07	2.32e-05	24.6319	3.98535	NA	NA	NA	NA	NA	NA	NA	NA	NA
OBP	OBP_to_OB2	Scn1b	FALSE	8.32e-06	0.000225286	19.8635	-0.800523	NA	NA	NA	NA	NA	NA	NA	NA	NA
OBP	OBP_to_OB2	Scrn1	FALSE	0.000140659	0.00294696	14.4933	1.02054	NA	NA	NA	NA	NA	NA	NA	NA	NA
OBP	OBP_to_OB2	Scube3	FALSE	0.00292321	0.0431485	8.85479	1.06541	NA	NA	NA	NA	NA	NA	NA	NA	NA
OBP	OBP_to_OB2	Sdc1	FALSE	4.73e-10	2.63e-08	38.7853	-1.04747	NA	NA	NA	NA	NA	NA	NA	NA	NA
OBP	OBP_to_OB2	Sdc2	FALSE	0.000589862	0.0105379	11.8077	-0.548494	NA	NA	NA	NA	NA	NA	NA	NA	NA
OBP	OBP_to_OB2	Sdf4	FALSE	0.00134636	0.0216804	10.2779	0.491502	NA	NA	NA	NA	NA	NA	NA	NA	NA
OBP	OBP_to_OB2	Sec11c	FALSE	1.11e-06	3.57e-05	23.7267	0.681777	NA	NA	NA	NA	NA	NA	NA	NA	NA
OBP	OBP_to_OB2	Sec61g	FALSE	0.0017972	0.028105	9.74593	0.480709	NA	NA	NA	NA	NA	NA	NA	NA	NA
OBP	OBP_to_OB2	Selenbp1	FALSE	0.000838251	0.0143416	11.1546	0.756128	NA	NA	NA	NA	NA	NA	NA	NA	NA
OBP	OBP_to_OB2	Selenoh	FALSE	0.000466098	0.0085364	12.2466	-0.624524	NA	NA	NA	NA	NA	NA	NA	NA	NA
OBP	OBP_to_OB2	Selenos	FALSE	5.42e-06	0.00015299	20.6838	0.56003	NA	NA	NA	NA	NA	NA	NA	NA	NA
OBP	OBP_to_OB2	Sema3b	FALSE	0	0	116.632	1.904	NA	NA	NA	NA	NA	NA	NA	NA	NA
OBP	OBP_to_OB2	Sema4d	FALSE	3.04e-11	2.01e-09	44.1542	2.12303	NA	NA	NA	NA	NA	NA	NA	NA	NA
OBP	OBP_to_OB2	Sema5a	FALSE	6.76e-06	0.000185707	20.2592	1.00563	NA	NA	NA	NA	NA	NA	NA	NA	NA
OBP	OBP_to_OB2	Sema6a	FALSE	0.000134287	0.00282975	14.5806	-2.07722	NA	NA	NA	NA	NA	NA	NA	NA	NA
OBP	OBP_to_OB2	Serbp1	FALSE	0.0010043	0.0168523	10.8196	-0.49629	NA	NA	NA	NA	NA	NA	NA	NA	NA
OBP	OBP_to_OB2	Serp1	FALSE	3.37e-06	9.87e-05	21.5915	0.5819	NA	NA	NA	NA	NA	NA	NA	NA	NA
OBP	OBP_to_OB2	Serpinb6a	FALSE	1.62e-10	9.8e-09	40.8783	-0.763692	NA	NA	NA	NA	NA	NA	NA	NA	NA
OBP	OBP_to_OB2	Serpinf1	FALSE	0	0	85.6876	0.905851	NA	NA	NA	NA	NA	NA	NA	NA	NA
OBP	OBP_to_OB2	Serping1	FALSE	1.81e-13	1.59e-11	54.1964	-1.0789	NA	NA	NA	NA	NA	NA	NA	NA	NA
OBP	OBP_to_OB2	Serpinh1	FALSE	0	0	92.735	0.797849	NA	NA	NA	NA	NA	NA	NA	NA	NA
OBP	OBP_to_OB2	Set	FALSE	5.37e-11	3.46e-09	43.0378	-0.735325	NA	NA	NA	NA	NA	NA	NA	NA	NA
OBP	OBP_to_OB2	Sf3a2	FALSE	0.000989286	0.0166259	10.8475	-0.690405	NA	NA	NA	NA	NA	NA	NA	NA	NA
OBP	OBP_to_OB2	Sfmbt2	FALSE	0.00115578	0.019039	10.5597	0.745864	NA	NA	NA	NA	NA	NA	NA	NA	NA
OBP	OBP_to_OB2	Sfrp1	FALSE	3.16e-06	9.42e-05	21.7141	-1.15391	NA	NA	NA	NA	NA	NA	NA	NA	NA
OBP	OBP_to_OB2	Sfxn3	FALSE	0.000104093	0.00223009	15.061	-0.75147	NA	NA	NA	NA	NA	NA	NA	NA	NA
OBP	OBP_to_OB2	Sgca	FALSE	3.89e-15	3.84e-13	61.7304	2.73724	NA	NA	NA	NA	NA	NA	NA	NA	NA
OBP	OBP_to_OB2	Sgms2	FALSE	0	0	176.999	1.57619	NA	NA	NA	NA	NA	NA	NA	NA	NA
OBP	OBP_to_OB2	Sgo1	FALSE	2.19e-05	0.0005458	18.0142	-1.61536	NA	NA	NA	NA	NA	NA	NA	NA	NA
OBP	OBP_to_OB2	Sgo2a	FALSE	6.16e-07	2.08e-05	24.8627	-2.0627	NA	NA	NA	NA	NA	NA	NA	NA	NA
OBP	OBP_to_OB2	Sh3bgrl3	FALSE	0.0032489	0.0472215	8.66214	-0.547244	NA	NA	NA	NA	NA	NA	NA	NA	NA
OBP	OBP_to_OB2	Sh3kbp1	FALSE	1.19e-10	7.36e-09	41.4748	-0.920144	NA	NA	NA	NA	NA	NA	NA	NA	NA
OBP	OBP_to_OB2	Sh3rf1	FALSE	0.00128301	0.0207939	10.3668	-0.749277	NA	NA	NA	NA	NA	NA	NA	NA	NA
OBP	OBP_to_OB2	Shc1	FALSE	0.000488052	0.00890114	12.1608	-0.602793	NA	NA	NA	NA	NA	NA	NA	NA	NA
OBP	OBP_to_OB2	Shc2	FALSE	9.17e-05	0.00200461	15.2997	0.829138	NA	NA	NA	NA	NA	NA	NA	NA	NA
OBP	OBP_to_OB2	Shcbp1	FALSE	1.06e-07	4.11e-06	28.2588	-1.82392	NA	NA	NA	NA	NA	NA	NA	NA	NA
OBP	OBP_to_OB2	Shmt1	FALSE	5.66e-07	1.93e-05	25.0231	-1.78261	NA	NA	NA	NA	NA	NA	NA	NA	NA
OBP	OBP_to_OB2	Sil1	FALSE	4.78e-06	0.000135608	20.9248	0.682919	NA	NA	NA	NA	NA	NA	NA	NA	NA
OBP	OBP_to_OB2	Siva1	FALSE	1.36e-07	5.16e-06	27.7768	-0.70744	NA	NA	NA	NA	NA	NA	NA	NA	NA
OBP	OBP_to_OB2	Ska1	FALSE	2.53e-07	9.12e-06	26.5811	-2.09741	NA	NA	NA	NA	NA	NA	NA	NA	NA
OBP	OBP_to_OB2	Ska3	FALSE	0.000943129	0.0159361	10.936	-1.17006	NA	NA	NA	NA	NA	NA	NA	NA	NA
OBP	OBP_to_OB2	Skiv2l2	FALSE	0.00275495	0.0409696	8.96305	-0.639828	NA	NA	NA	NA	NA	NA	NA	NA	NA
OBP	OBP_to_OB2	Slbp	FALSE	1.97e-06	6.12e-05	22.6219	-0.752331	NA	NA	NA	NA	NA	NA	NA	NA	NA
OBP	OBP_to_OB2	Slc13a4	FALSE	5.74e-05	0.0013069	16.1882	2.06498	NA	NA	NA	NA	NA	NA	NA	NA	NA
OBP	OBP_to_OB2	Slc13a5	FALSE	0	0	82.8579	1.22842	NA	NA	NA	NA	NA	NA	NA	NA	NA
OBP	OBP_to_OB2	Slc17a9	FALSE	0.000120244	0.00254612	14.7889	1.12768	NA	NA	NA	NA	NA	NA	NA	NA	NA
OBP	OBP_to_OB2	Slc19a1	FALSE	0.000249475	0.00485409	13.4161	-0.792979	NA	NA	NA	NA	NA	NA	NA	NA	NA
OBP	OBP_to_OB2	Slc1a1	FALSE	0.00321259	0.046756	8.68262	-0.970385	NA	NA	NA	NA	NA	NA	NA	NA	NA
OBP	OBP_to_OB2	Slc22a17	FALSE	0.000418288	0.00775182	12.4487	0.808636	NA	NA	NA	NA	NA	NA	NA	NA	NA
OBP	OBP_to_OB2	Slc22a23	FALSE	1.76e-06	5.49e-05	22.846	1.38109	NA	NA	NA	NA	NA	NA	NA	NA	NA
OBP	OBP_to_OB2	Slc22a3	FALSE	0.000190148	0.00384719	13.926	-2.26891	NA	NA	NA	NA	NA	NA	NA	NA	NA
OBP	OBP_to_OB2	Slc27a3	FALSE	4.4e-05	0.00102737	16.6884	0.824334	NA	NA	NA	NA	NA	NA	NA	NA	NA
OBP	OBP_to_OB2	Slc29a1	FALSE	0	0	289.609	-1.86959	NA	NA	NA	NA	NA	NA	NA	NA	NA
OBP	OBP_to_OB2	Slc2a13	FALSE	3.03e-05	0.000731665	17.3995	0.945041	NA	NA	NA	NA	NA	NA	NA	NA	NA
OBP	OBP_to_OB2	Slc35b1	FALSE	1.58e-10	9.6e-09	40.9244	0.772701	NA	NA	NA	NA	NA	NA	NA	NA	NA
OBP	OBP_to_OB2	Slc36a2	FALSE	0	0	125.353	1.46487	NA	NA	NA	NA	NA	NA	NA	NA	NA
OBP	OBP_to_OB2	Slc37a2	FALSE	0	0	70.5506	2.78135	NA	NA	NA	NA	NA	NA	NA	NA	NA
OBP	OBP_to_OB2	Slc38a10	FALSE	5.1e-09	2.38e-07	34.1526	0.710417	NA	NA	NA	NA	NA	NA	NA	NA	NA
OBP	OBP_to_OB2	Slc43a3	FALSE	1.11e-16	1.3e-14	68.8429	-2.72219	NA	NA	NA	NA	NA	NA	NA	NA	NA
OBP	OBP_to_OB2	Slc5a3	FALSE	0.00158848	0.025129	9.97306	-0.722612	NA	NA	NA	NA	NA	NA	NA	NA	NA
OBP	OBP_to_OB2	Slc6a2	FALSE	0.00151856	0.0242336	10.056	1.36084	NA	NA	NA	NA	NA	NA	NA	NA	NA
OBP	OBP_to_OB2	Slc6a9	FALSE	4.58e-06	0.000130565	21.0049	0.912627	NA	NA	NA	NA	NA	NA	NA	NA	NA
OBP	OBP_to_OB2	Slc7a2	FALSE	2.19e-13	1.9e-11	53.8234	1.54938	NA	NA	NA	NA	NA	NA	NA	NA	NA
OBP	OBP_to_OB2	Slc7a3	FALSE	1.48e-05	0.000383983	18.7596	1.54349	NA	NA	NA	NA	NA	NA	NA	NA	NA
OBP	OBP_to_OB2	Slf1	FALSE	0.00279432	0.0415268	8.93712	-0.785663	NA	NA	NA	NA	NA	NA	NA	NA	NA
OBP	OBP_to_OB2	Slfn9	FALSE	1.43e-07	5.39e-06	27.6862	-2.05627	NA	NA	NA	NA	NA	NA	NA	NA	NA
OBP	OBP_to_OB2	Slpi	FALSE	1.01e-08	4.55e-07	32.8127	1.59755	NA	NA	NA	NA	NA	NA	NA	NA	NA
OBP	OBP_to_OB2	Smad9	FALSE	7.02e-05	0.00157263	15.8064	0.830644	NA	NA	NA	NA	NA	NA	NA	NA	NA
OBP	OBP_to_OB2	Smagp	FALSE	3.06e-05	0.000737798	17.3801	1.10895	NA	NA	NA	NA	NA	NA	NA	NA	NA
OBP	OBP_to_OB2	Smc2	FALSE	2.69e-13	2.27e-11	53.4253	-1.6442	NA	NA	NA	NA	NA	NA	NA	NA	NA
OBP	OBP_to_OB2	Smc4	FALSE	1.99e-13	1.74e-11	54.0173	-1.13649	NA	NA	NA	NA	NA	NA	NA	NA	NA
OBP	OBP_to_OB2	Smc6	FALSE	4.47e-05	0.00104152	16.6605	-0.626712	NA	NA	NA	NA	NA	NA	NA	NA	NA
OBP	OBP_to_OB2	Smim14	FALSE	9.13e-12	6.56e-10	46.5058	0.739154	NA	NA	NA	NA	NA	NA	NA	NA	NA
OBP	OBP_to_OB2	Smim15	FALSE	4.81e-08	1.98e-06	29.7931	-0.857341	NA	NA	NA	NA	NA	NA	NA	NA	NA
OBP	OBP_to_OB2	Smim5	FALSE	4.27e-06	0.000122307	21.1401	1.30466	NA	NA	NA	NA	NA	NA	NA	NA	NA
OBP	OBP_to_OB2	Smn1	FALSE	0.00319291	0.0465316	8.69382	-0.687837	NA	NA	NA	NA	NA	NA	NA	NA	NA
OBP	OBP_to_OB2	Smoc1	FALSE	0.00286592	0.0423935	8.89092	-1.03544	NA	NA	NA	NA	NA	NA	NA	NA	NA
OBP	OBP_to_OB2	Smox	FALSE	0	0	103.504	1.85683	NA	NA	NA	NA	NA	NA	NA	NA	NA
OBP	OBP_to_OB2	Sms	FALSE	0.000618349	0.0109749	11.7199	-0.747703	NA	NA	NA	NA	NA	NA	NA	NA	NA
OBP	OBP_to_OB2	Smtn	FALSE	5.23e-05	0.00120602	16.3623	-0.77661	NA	NA	NA	NA	NA	NA	NA	NA	NA
OBP	OBP_to_OB2	Smtnl2	FALSE	0.00025309	0.0049113	13.3891	1.41461	NA	NA	NA	NA	NA	NA	NA	NA	NA
OBP	OBP_to_OB2	Snai2	FALSE	0	0	190.464	-2.24865	NA	NA	NA	NA	NA	NA	NA	NA	NA
OBP	OBP_to_OB2	Sncaip	FALSE	0	0	81.8634	-1.71976	NA	NA	NA	NA	NA	NA	NA	NA	NA
OBP	OBP_to_OB2	Sncb	FALSE	5.95e-05	0.0013513	16.119	2.15391	NA	NA	NA	NA	NA	NA	NA	NA	NA
OBP	OBP_to_OB2	Snhg18	FALSE	2.33e-15	2.38e-13	62.7537	0.808366	NA	NA	NA	NA	NA	NA	NA	NA	NA
OBP	OBP_to_OB2	Snrpd1	FALSE	2.55e-15	2.59e-13	62.5652	-0.850927	NA	NA	NA	NA	NA	NA	NA	NA	NA
OBP	OBP_to_OB2	Snrpe	FALSE	0.000612451	0.010888	11.7377	-0.511921	NA	NA	NA	NA	NA	NA	NA	NA	NA
OBP	OBP_to_OB2	Snrpg	FALSE	4.82e-05	0.00111817	16.5177	-0.589222	NA	NA	NA	NA	NA	NA	NA	NA	NA
OBP	OBP_to_OB2	Snta1	FALSE	1.05e-05	0.000278125	19.4256	-0.625352	NA	NA	NA	NA	NA	NA	NA	NA	NA
OBP	OBP_to_OB2	Snw1	FALSE	6.73e-07	2.26e-05	24.6903	-0.704374	NA	NA	NA	NA	NA	NA	NA	NA	NA
OBP	OBP_to_OB2	Snx18	FALSE	6.46e-06	0.000178915	20.3474	-0.773736	NA	NA	NA	NA	NA	NA	NA	NA	NA
OBP	OBP_to_OB2	Sod3	FALSE	8.88e-16	9.5e-14	64.6844	-1.4487	NA	NA	NA	NA	NA	NA	NA	NA	NA
OBP	OBP_to_OB2	Sorbs1	FALSE	3.19e-05	0.00076678	17.3037	-1.10762	NA	NA	NA	NA	NA	NA	NA	NA	NA
OBP	OBP_to_OB2	Sorcs2	FALSE	0.00074986	0.0130025	11.3614	0.843773	NA	NA	NA	NA	NA	NA	NA	NA	NA
OBP	OBP_to_OB2	Sost	FALSE	0	0	91.5844	2.94647	NA	NA	NA	NA	NA	NA	NA	NA	NA
OBP	OBP_to_OB2	Spag5	FALSE	0.00218789	0.03342	9.38483	-1.24096	NA	NA	NA	NA	NA	NA	NA	NA	NA
OBP	OBP_to_OB2	Sparc	FALSE	0	0	157.159	0.994853	NA	NA	NA	NA	NA	NA	NA	NA	NA
OBP	OBP_to_OB2	Spc24	FALSE	7.21e-11	4.58e-09	42.46	-1.65049	NA	NA	NA	NA	NA	NA	NA	NA	NA
OBP	OBP_to_OB2	Spc25	FALSE	4.48e-12	3.33e-10	47.9044	-2.23986	NA	NA	NA	NA	NA	NA	NA	NA	NA
OBP	OBP_to_OB2	Spdl1	FALSE	0.000197551	0.00398221	13.8542	-1.27713	NA	NA	NA	NA	NA	NA	NA	NA	NA
OBP	OBP_to_OB2	Spns2	FALSE	1.75e-10	1.06e-08	40.7272	1.15185	NA	NA	NA	NA	NA	NA	NA	NA	NA
OBP	OBP_to_OB2	Sptssa	FALSE	0.000603535	0.010747	11.765	-0.603227	NA	NA	NA	NA	NA	NA	NA	NA	NA
OBP	OBP_to_OB2	Sqor	FALSE	0.000186464	0.0037835	13.9628	-0.874124	NA	NA	NA	NA	NA	NA	NA	NA	NA
OBP	OBP_to_OB2	Sri	FALSE	3.3e-05	0.000789178	17.2364	-0.617128	NA	NA	NA	NA	NA	NA	NA	NA	NA
OBP	OBP_to_OB2	Srpx2	FALSE	1.92e-11	1.32e-09	45.049	-0.761562	NA	NA	NA	NA	NA	NA	NA	NA	NA
OBP	OBP_to_OB2	Srsf3	FALSE	2.05e-05	0.000515137	18.144	-0.613634	NA	NA	NA	NA	NA	NA	NA	NA	NA
OBP	OBP_to_OB2	Srsf7	FALSE	9.86e-06	0.000263017	19.5393	-0.708745	NA	NA	NA	NA	NA	NA	NA	NA	NA
OBP	OBP_to_OB2	Ssc5d	FALSE	0.00104609	0.0174196	10.7442	-1.33082	NA	NA	NA	NA	NA	NA	NA	NA	NA
OBP	OBP_to_OB2	Sspn	FALSE	7.13e-08	2.88e-06	29.0284	-0.90827	NA	NA	NA	NA	NA	NA	NA	NA	NA
OBP	OBP_to_OB2	Ssr2	FALSE	5.55e-12	4.05e-10	47.4819	0.729333	NA	NA	NA	NA	NA	NA	NA	NA	NA
OBP	OBP_to_OB2	Ssr4	FALSE	1.89e-15	1.95e-13	63.221	0.713075	NA	NA	NA	NA	NA	NA	NA	NA	NA
OBP	OBP_to_OB2	St3gal2	FALSE	0.00168561	0.026512	9.86381	-0.767861	NA	NA	NA	NA	NA	NA	NA	NA	NA
OBP	OBP_to_OB2	St8sia2	FALSE	0.000465755	0.0085364	12.248	-2.36275	NA	NA	NA	NA	NA	NA	NA	NA	NA
OBP	OBP_to_OB2	Stc2	FALSE	2.94e-07	1.04e-05	26.2881	0.951615	NA	NA	NA	NA	NA	NA	NA	NA	NA
OBP	OBP_to_OB2	Steap2	FALSE	4.49e-11	2.92e-09	43.3888	-1.43726	NA	NA	NA	NA	NA	NA	NA	NA	NA
OBP	OBP_to_OB2	Stil	FALSE	1.07e-05	0.000284096	19.3804	-1.62031	NA	NA	NA	NA	NA	NA	NA	NA	NA
OBP	OBP_to_OB2	Stmn1	FALSE	4.23e-13	3.55e-11	52.532	-1.73865	NA	NA	NA	NA	NA	NA	NA	NA	NA
OBP	OBP_to_OB2	Ston1	FALSE	0.000545218	0.00986136	11.9543	-1.07961	NA	NA	NA	NA	NA	NA	NA	NA	NA
OBP	OBP_to_OB2	Strbp	FALSE	0.00011263	0.00239653	14.9122	1.421	NA	NA	NA	NA	NA	NA	NA	NA	NA
OBP	OBP_to_OB2	Stx11	FALSE	0.0014793	0.0236591	10.1042	-1.03787	NA	NA	NA	NA	NA	NA	NA	NA	NA
OBP	OBP_to_OB2	Suclg2	FALSE	0.000511968	0.00929075	12.0716	-0.684889	NA	NA	NA	NA	NA	NA	NA	NA	NA
OBP	OBP_to_OB2	Sugt1	FALSE	0.000390805	0.00731077	12.5756	-0.572586	NA	NA	NA	NA	NA	NA	NA	NA	NA
OBP	OBP_to_OB2	Sulf2	FALSE	0.00192522	0.0299356	9.6195	-0.866398	NA	NA	NA	NA	NA	NA	NA	NA	NA
OBP	OBP_to_OB2	Sult1a1	FALSE	3.96e-08	1.65e-06	30.1673	-1.84419	NA	NA	NA	NA	NA	NA	NA	NA	NA
OBP	OBP_to_OB2	Supt20	FALSE	9.16e-05	0.002003	15.3031	-0.787835	NA	NA	NA	NA	NA	NA	NA	NA	NA
OBP	OBP_to_OB2	Suv39h1	FALSE	0.000381701	0.00716502	12.6197	-1.09609	NA	NA	NA	NA	NA	NA	NA	NA	NA
OBP	OBP_to_OB2	Svep1	FALSE	8.88e-16	9.5e-14	64.5685	-2.01644	NA	NA	NA	NA	NA	NA	NA	NA	NA
OBP	OBP_to_OB2	Svil	FALSE	7.72e-10	4.15e-08	37.8297	-1.14827	NA	NA	NA	NA	NA	NA	NA	NA	NA
OBP	OBP_to_OB2	Sybu	FALSE	0.000828917	0.0142265	11.1753	1.0674	NA	NA	NA	NA	NA	NA	NA	NA	NA
OBP	OBP_to_OB2	Syn3	FALSE	9.04e-06	0.000243053	19.7042	-1.81828	NA	NA	NA	NA	NA	NA	NA	NA	NA
OBP	OBP_to_OB2	Syngr4	FALSE	0.0010402	0.0173348	10.7546	-2.67101	NA	NA	NA	NA	NA	NA	NA	NA	NA
OBP	OBP_to_OB2	Synm	FALSE	0.00161195	0.0254578	9.94604	0.757717	NA	NA	NA	NA	NA	NA	NA	NA	NA
OBP	OBP_to_OB2	Syt6	FALSE	0.0029544	0.0435499	8.83542	0.888388	NA	NA	NA	NA	NA	NA	NA	NA	NA
OBP	OBP_to_OB2	Tacc2	FALSE	0.000125491	0.00265208	14.7083	-0.867319	NA	NA	NA	NA	NA	NA	NA	NA	NA
OBP	OBP_to_OB2	Tacc3	FALSE	2.99e-07	1.05e-05	26.2533	-1.49886	NA	NA	NA	NA	NA	NA	NA	NA	NA
OBP	OBP_to_OB2	Tagln	FALSE	0	0	354.765	-3.24383	NA	NA	NA	NA	NA	NA	NA	NA	NA
OBP	OBP_to_OB2	Tagln2	FALSE	0	0	171.755	-1.64097	NA	NA	NA	NA	NA	NA	NA	NA	NA
OBP	OBP_to_OB2	Tanc2	FALSE	3.79e-11	2.48e-09	43.7216	1.05878	NA	NA	NA	NA	NA	NA	NA	NA	NA
OBP	OBP_to_OB2	Tbc1d2b	FALSE	1.71e-12	1.33e-10	49.7937	-1.00717	NA	NA	NA	NA	NA	NA	NA	NA	NA
OBP	OBP_to_OB2	Tbxas1	FALSE	9.3e-08	3.67e-06	28.5142	2.05412	NA	NA	NA	NA	NA	NA	NA	NA	NA
OBP	OBP_to_OB2	Tcaf1	FALSE	0.0010818	0.0179323	10.6821	-0.649387	NA	NA	NA	NA	NA	NA	NA	NA	NA
OBP	OBP_to_OB2	Tcf19	FALSE	9.23e-05	0.00201195	15.289	-1.16073	NA	NA	NA	NA	NA	NA	NA	NA	NA
OBP	OBP_to_OB2	Tcf7	FALSE	4.33e-06	0.000123814	21.1141	-1.00456	NA	NA	NA	NA	NA	NA	NA	NA	NA
OBP	OBP_to_OB2	Tecr	FALSE	8.67e-07	2.84e-05	24.2021	0.598425	NA	NA	NA	NA	NA	NA	NA	NA	NA
OBP	OBP_to_OB2	Tenm4	FALSE	0.000547364	0.00989197	11.947	1.11507	NA	NA	NA	NA	NA	NA	NA	NA	NA
OBP	OBP_to_OB2	Tfap4	FALSE	0.000573434	0.010278	11.8603	-1.23214	NA	NA	NA	NA	NA	NA	NA	NA	NA
OBP	OBP_to_OB2	Tfdp1	FALSE	3.11e-07	1.09e-05	26.1807	-0.834021	NA	NA	NA	NA	NA	NA	NA	NA	NA
OBP	OBP_to_OB2	Tfpi2	FALSE	0.000236583	0.00464464	13.5156	-0.918924	NA	NA	NA	NA	NA	NA	NA	NA	NA
OBP	OBP_to_OB2	Tgfa	FALSE	2.33e-07	8.47e-06	26.7373	2.37616	NA	NA	NA	NA	NA	NA	NA	NA	NA
OBP	OBP_to_OB2	Tgfb1i1	FALSE	0	0	132.831	-1.51511	NA	NA	NA	NA	NA	NA	NA	NA	NA
OBP	OBP_to_OB2	Tgfb2	FALSE	2.6e-07	9.36e-06	26.5239	-0.982412	NA	NA	NA	NA	NA	NA	NA	NA	NA
OBP	OBP_to_OB2	Tgfb3	FALSE	0.000242413	0.00474629	13.47	-0.896909	NA	NA	NA	NA	NA	NA	NA	NA	NA
OBP	OBP_to_OB2	Tgfbr3	FALSE	0	0	99.8859	-1.78963	NA	NA	NA	NA	NA	NA	NA	NA	NA
OBP	OBP_to_OB2	Thbs2	FALSE	7.77e-16	8.48e-14	65.0424	-1.03559	NA	NA	NA	NA	NA	NA	NA	NA	NA
OBP	OBP_to_OB2	Thbs4	FALSE	0	0	224.87	2.72041	NA	NA	NA	NA	NA	NA	NA	NA	NA
OBP	OBP_to_OB2	Thop1	FALSE	0.00145409	0.0233242	10.1359	-0.656447	NA	NA	NA	NA	NA	NA	NA	NA	NA
OBP	OBP_to_OB2	Thsd4	FALSE	0.000384693	0.00721498	12.6051	-0.873709	NA	NA	NA	NA	NA	NA	NA	NA	NA
OBP	OBP_to_OB2	Thsd7a	FALSE	0.000237512	0.00465869	13.5083	-1.86199	NA	NA	NA	NA	NA	NA	NA	NA	NA
OBP	OBP_to_OB2	Ticrr	FALSE	0.000113658	0.00241604	14.8951	-1.95238	NA	NA	NA	NA	NA	NA	NA	NA	NA
OBP	OBP_to_OB2	Timm10	FALSE	0.000354476	0.00670587	12.7581	-0.742137	NA	NA	NA	NA	NA	NA	NA	NA	NA
OBP	OBP_to_OB2	Timm9	FALSE	0.000332236	0.00631547	12.8793	-0.727096	NA	NA	NA	NA	NA	NA	NA	NA	NA
OBP	OBP_to_OB2	Timp2	FALSE	0.000333435	0.00632975	12.8726	-0.546076	NA	NA	NA	NA	NA	NA	NA	NA	NA
OBP	OBP_to_OB2	Timp3	FALSE	0	0	297.448	-2.41178	NA	NA	NA	NA	NA	NA	NA	NA	NA
OBP	OBP_to_OB2	Tipin	FALSE	0.00101825	0.0170211	10.7941	-0.665941	NA	NA	NA	NA	NA	NA	NA	NA	NA
OBP	OBP_to_OB2	Tk1	FALSE	8.53e-10	4.54e-08	37.6341	-1.81087	NA	NA	NA	NA	NA	NA	NA	NA	NA
OBP	OBP_to_OB2	Tle2	FALSE	0.00041928	0.00776361	12.4443	-0.810095	NA	NA	NA	NA	NA	NA	NA	NA	NA
OBP	OBP_to_OB2	Tln2	FALSE	3.45e-10	1.96e-08	39.3993	-1.34049	NA	NA	NA	NA	NA	NA	NA	NA	NA
OBP	OBP_to_OB2	Tm4sf1	FALSE	1.32e-07	5.04e-06	27.8308	-0.888034	NA	NA	NA	NA	NA	NA	NA	NA	NA
OBP	OBP_to_OB2	Tmbim4	FALSE	0.000165838	0.00341225	14.1833	0.56515	NA	NA	NA	NA	NA	NA	NA	NA	NA
OBP	OBP_to_OB2	Tmed10	FALSE	4.36e-11	2.84e-09	43.4453	0.615548	NA	NA	NA	NA	NA	NA	NA	NA	NA
OBP	OBP_to_OB2	Tmed3	FALSE	3.72e-05	0.000882834	17.0089	0.566882	NA	NA	NA	NA	NA	NA	NA	NA	NA
OBP	OBP_to_OB2	Tmed5	FALSE	0.000298081	0.00571327	13.0824	-0.598866	NA	NA	NA	NA	NA	NA	NA	NA	NA
OBP	OBP_to_OB2	Tmeff1	FALSE	0.000278464	0.00537028	13.21	-0.929311	NA	NA	NA	NA	NA	NA	NA	NA	NA
OBP	OBP_to_OB2	Tmem100	FALSE	2.19e-10	1.3e-08	40.2922	-1.96975	NA	NA	NA	NA	NA	NA	NA	NA	NA
OBP	OBP_to_OB2	Tmem117	FALSE	2.96e-08	1.26e-06	30.731	1.4521	NA	NA	NA	NA	NA	NA	NA	NA	NA
OBP	OBP_to_OB2	Tmem121	FALSE	9.78e-06	0.000261257	19.5545	-1.6238	NA	NA	NA	NA	NA	NA	NA	NA	NA
OBP	OBP_to_OB2	Tmem17	FALSE	0.00103972	0.0173348	10.7555	-0.898567	NA	NA	NA	NA	NA	NA	NA	NA	NA
OBP	OBP_to_OB2	Tmem2	FALSE	6.53e-08	2.65e-06	29.2007	-0.936029	NA	NA	NA	NA	NA	NA	NA	NA	NA
OBP	OBP_to_OB2	Tmem209	FALSE	3.95e-06	0.000113707	21.2874	-1.09406	NA	NA	NA	NA	NA	NA	NA	NA	NA
OBP	OBP_to_OB2	Tmem246	FALSE	0.00131794	0.0212904	10.3172	-1.15822	NA	NA	NA	NA	NA	NA	NA	NA	NA
OBP	OBP_to_OB2	Tmem248	FALSE	8.97e-05	0.00196751	15.3425	0.637728	NA	NA	NA	NA	NA	NA	NA	NA	NA
OBP	OBP_to_OB2	Tmem47	FALSE	3.83e-09	1.83e-07	34.7077	-1.00207	NA	NA	NA	NA	NA	NA	NA	NA	NA
OBP	OBP_to_OB2	Tmem59	FALSE	5.23e-07	1.79e-05	25.1757	0.571148	NA	NA	NA	NA	NA	NA	NA	NA	NA
OBP	OBP_to_OB2	Tmem86a	FALSE	0	0	92.9274	-2.09496	NA	NA	NA	NA	NA	NA	NA	NA	NA
OBP	OBP_to_OB2	Tmod2	FALSE	0.000142431	0.00297266	14.4697	-1.84524	NA	NA	NA	NA	NA	NA	NA	NA	NA
OBP	OBP_to_OB2	Tmpo	FALSE	4.24e-07	1.46e-05	25.5822	-1.03022	NA	NA	NA	NA	NA	NA	NA	NA	NA
OBP	OBP_to_OB2	Tmtc1	FALSE	4.68e-08	1.94e-06	29.8435	1.33664	NA	NA	NA	NA	NA	NA	NA	NA	NA
OBP	OBP_to_OB2	Tmtc2	FALSE	0.000187273	0.00379606	13.9547	0.773442	NA	NA	NA	NA	NA	NA	NA	NA	NA
OBP	OBP_to_OB2	Tnc	FALSE	0	0	292.11	-2.02891	NA	NA	NA	NA	NA	NA	NA	NA	NA
OBP	OBP_to_OB2	Tnfrsf10b	FALSE	1.25e-05	0.000328567	19.0889	-0.961582	NA	NA	NA	NA	NA	NA	NA	NA	NA
OBP	OBP_to_OB2	Tnfrsf11b	FALSE	1.9e-10	1.14e-08	40.5693	-1.57168	NA	NA	NA	NA	NA	NA	NA	NA	NA
OBP	OBP_to_OB2	Tnfrsf19	FALSE	2.36e-14	2.19e-12	58.2045	-1.69922	NA	NA	NA	NA	NA	NA	NA	NA	NA
OBP	OBP_to_OB2	Tnfsf11	FALSE	9.17e-06	0.000245951	19.6768	-2.0592	NA	NA	NA	NA	NA	NA	NA	NA	NA
OBP	OBP_to_OB2	Tnn	FALSE	3e-15	3e-13	62.2485	-1.29684	NA	NA	NA	NA	NA	NA	NA	NA	NA
OBP	OBP_to_OB2	Tnnc1	FALSE	8.09e-07	2.66e-05	24.3356	2.11871	NA	NA	NA	NA	NA	NA	NA	NA	NA
OBP	OBP_to_OB2	Tns3	FALSE	0	0	85.6386	-1.08088	NA	NA	NA	NA	NA	NA	NA	NA	NA
OBP	OBP_to_OB2	Tob1	FALSE	0.000230782	0.00455121	13.5622	0.590682	NA	NA	NA	NA	NA	NA	NA	NA	NA
OBP	OBP_to_OB2	Tomm70a	FALSE	0.00166672	0.0262337	9.88455	-0.603956	NA	NA	NA	NA	NA	NA	NA	NA	NA
OBP	OBP_to_OB2	Top2a	FALSE	1.96e-09	9.79e-08	36.0096	-1.82454	NA	NA	NA	NA	NA	NA	NA	NA	NA
OBP	OBP_to_OB2	Topbp1	FALSE	6.64e-07	2.24e-05	24.7179	-1.06712	NA	NA	NA	NA	NA	NA	NA	NA	NA
OBP	OBP_to_OB2	Tox	FALSE	1.43e-05	0.000372982	18.8332	1.86799	NA	NA	NA	NA	NA	NA	NA	NA	NA
OBP	OBP_to_OB2	Tpbgl	FALSE	0.00189722	0.0295422	9.64641	1.07516	NA	NA	NA	NA	NA	NA	NA	NA	NA
OBP	OBP_to_OB2	Tpm1	FALSE	0	0	113.513	-0.924293	NA	NA	NA	NA	NA	NA	NA	NA	NA
OBP	OBP_to_OB2	Tpm2	FALSE	0	0	226.877	-1.69075	NA	NA	NA	NA	NA	NA	NA	NA	NA
OBP	OBP_to_OB2	Tpm4	FALSE	0.000252935	0.0049113	13.3903	-0.544395	NA	NA	NA	NA	NA	NA	NA	NA	NA
OBP	OBP_to_OB2	Tpst1	FALSE	3.86e-06	0.000111391	21.3344	-1.27419	NA	NA	NA	NA	NA	NA	NA	NA	NA
OBP	OBP_to_OB2	Tpx2	FALSE	1.35e-10	8.24e-09	41.2329	-1.99234	NA	NA	NA	NA	NA	NA	NA	NA	NA
OBP	OBP_to_OB2	Trabd2b	FALSE	1.37e-14	1.29e-12	59.277	-2.70911	NA	NA	NA	NA	NA	NA	NA	NA	NA
OBP	OBP_to_OB2	Traip	FALSE	2.79e-05	0.000682069	17.5537	-1.71385	NA	NA	NA	NA	NA	NA	NA	NA	NA
OBP	OBP_to_OB2	Tram1l1	FALSE	2.1e-05	0.000526563	18.0956	-1.54894	NA	NA	NA	NA	NA	NA	NA	NA	NA
OBP	OBP_to_OB2	Trib1	FALSE	0.00063781	0.0112928	11.6623	0.906541	NA	NA	NA	NA	NA	NA	NA	NA	NA
OBP	OBP_to_OB2	Trim2	FALSE	0.000144648	0.0030103	14.4406	-0.908917	NA	NA	NA	NA	NA	NA	NA	NA	NA
OBP	OBP_to_OB2	Trim59	FALSE	3.67e-06	0.000106591	21.429	-1.15524	NA	NA	NA	NA	NA	NA	NA	NA	NA
OBP	OBP_to_OB2	Trim7	FALSE	0.00224697	0.0342075	9.33599	-1.01753	NA	NA	NA	NA	NA	NA	NA	NA	NA
OBP	OBP_to_OB2	Trip13	FALSE	1.13e-06	3.64e-05	23.6888	-1.4639	NA	NA	NA	NA	NA	NA	NA	NA	NA
OBP	OBP_to_OB2	Trmt6	FALSE	0.00283178	0.0419692	8.91281	-0.726613	NA	NA	NA	NA	NA	NA	NA	NA	NA
OBP	OBP_to_OB2	Troap	FALSE	0.00238275	0.0360234	9.22851	-1.33601	NA	NA	NA	NA	NA	NA	NA	NA	NA
OBP	OBP_to_OB2	Trp53	FALSE	4.64e-08	1.93e-06	29.863	-0.843935	NA	NA	NA	NA	NA	NA	NA	NA	NA
OBP	OBP_to_OB2	Trpc6	FALSE	0.00333981	0.0483498	8.61186	1.10482	NA	NA	NA	NA	NA	NA	NA	NA	NA
OBP	OBP_to_OB2	Trpv2	FALSE	2.69e-11	1.8e-09	44.3876	-1.28994	NA	NA	NA	NA	NA	NA	NA	NA	NA
OBP	OBP_to_OB2	Trpv4	FALSE	0.000554153	0.00999811	11.924	0.937881	NA	NA	NA	NA	NA	NA	NA	NA	NA
OBP	OBP_to_OB2	Tslp	FALSE	0.00186824	0.0291117	9.67469	-1.5365	NA	NA	NA	NA	NA	NA	NA	NA	NA
OBP	OBP_to_OB2	Tspan11	FALSE	8.5e-08	3.39e-06	28.6883	0.91618	NA	NA	NA	NA	NA	NA	NA	NA	NA
OBP	OBP_to_OB2	Tspan18	FALSE	0	0	74.5841	-2.06673	NA	NA	NA	NA	NA	NA	NA	NA	NA
OBP	OBP_to_OB2	Tspan4	FALSE	1.86e-05	0.00047091	18.3304	-0.601939	NA	NA	NA	NA	NA	NA	NA	NA	NA
OBP	OBP_to_OB2	Tspan8	FALSE	1.42e-09	7.25e-08	36.6382	-3.04822	NA	NA	NA	NA	NA	NA	NA	NA	NA
OBP	OBP_to_OB2	Tspyl3	FALSE	0.00131956	0.0212914	10.315	-1.81368	NA	NA	NA	NA	NA	NA	NA	NA	NA
OBP	OBP_to_OB2	Ttc12	FALSE	0.000100686	0.00216986	15.1238	-1.12833	NA	NA	NA	NA	NA	NA	NA	NA	NA
OBP	OBP_to_OB2	Ttc28	FALSE	1.3e-11	9.16e-10	45.8132	-0.938822	NA	NA	NA	NA	NA	NA	NA	NA	NA
OBP	OBP_to_OB2	Ttk	FALSE	1.37e-06	4.37e-05	23.3194	-2.06127	NA	NA	NA	NA	NA	NA	NA	NA	NA
OBP	OBP_to_OB2	Ttyh3	FALSE	0	0	76.6566	-2.02539	NA	NA	NA	NA	NA	NA	NA	NA	NA
OBP	OBP_to_OB2	Tuba1a	FALSE	0.00232497	0.0352719	9.27347	-0.596734	NA	NA	NA	NA	NA	NA	NA	NA	NA
OBP	OBP_to_OB2	Tuba1b	FALSE	0	0	93.9161	-1.08683	NA	NA	NA	NA	NA	NA	NA	NA	NA
OBP	OBP_to_OB2	Tuba1c	FALSE	7.77e-16	8.48e-14	65.0213	-1.02544	NA	NA	NA	NA	NA	NA	NA	NA	NA
OBP	OBP_to_OB2	Tubb4b	FALSE	2.78e-06	8.36e-05	21.9603	-0.727626	NA	NA	NA	NA	NA	NA	NA	NA	NA
OBP	OBP_to_OB2	Tubb5	FALSE	0	0	117.613	-1.07501	NA	NA	NA	NA	NA	NA	NA	NA	NA
OBP	OBP_to_OB2	Tubb6	FALSE	5.06e-12	3.73e-10	47.6653	-0.994371	NA	NA	NA	NA	NA	NA	NA	NA	NA
OBP	OBP_to_OB2	Twistnb	FALSE	2.5e-06	7.59e-05	22.1682	-0.712901	NA	NA	NA	NA	NA	NA	NA	NA	NA
OBP	OBP_to_OB2	Tyms	FALSE	2.21e-13	1.91e-11	53.807	-1.4871	NA	NA	NA	NA	NA	NA	NA	NA	NA
OBP	OBP_to_OB2	U2af1	FALSE	0.000142002	0.00296776	14.4754	-0.582895	NA	NA	NA	NA	NA	NA	NA	NA	NA
OBP	OBP_to_OB2	Ube2c	FALSE	1.85e-07	6.86e-06	27.1828	-1.7414	NA	NA	NA	NA	NA	NA	NA	NA	NA
OBP	OBP_to_OB2	Ube2l6	FALSE	2.54e-11	1.71e-09	44.5058	-1.73177	NA	NA	NA	NA	NA	NA	NA	NA	NA
OBP	OBP_to_OB2	Ube2ql1	FALSE	6.88e-12	5.01e-10	47.0609	2.2768	NA	NA	NA	NA	NA	NA	NA	NA	NA
OBP	OBP_to_OB2	Ube2v2	FALSE	5.13e-08	2.11e-06	29.6653	-0.740661	NA	NA	NA	NA	NA	NA	NA	NA	NA
OBP	OBP_to_OB2	Uchl3	FALSE	0.0002307	0.00455121	13.5629	-0.677378	NA	NA	NA	NA	NA	NA	NA	NA	NA
OBP	OBP_to_OB2	Ugcg	FALSE	6.2e-06	0.000172441	20.4252	-0.875321	NA	NA	NA	NA	NA	NA	NA	NA	NA
OBP	OBP_to_OB2	Ugp2	FALSE	5.48e-05	0.0012558	16.2737	-0.622981	NA	NA	NA	NA	NA	NA	NA	NA	NA
OBP	OBP_to_OB2	Uhrf1	FALSE	9.68e-08	3.78e-06	28.4372	-1.54176	NA	NA	NA	NA	NA	NA	NA	NA	NA
OBP	OBP_to_OB2	Ulbp1	FALSE	1.44e-05	0.000376229	18.8099	-1.47353	NA	NA	NA	NA	NA	NA	NA	NA	NA
OBP	OBP_to_OB2	Umps	FALSE	3.15e-06	9.4e-05	21.7225	-0.928291	NA	NA	NA	NA	NA	NA	NA	NA	NA
OBP	OBP_to_OB2	Uqcrq	FALSE	7.64e-05	0.0016964	15.6457	0.517896	NA	NA	NA	NA	NA	NA	NA	NA	NA
OBP	OBP_to_OB2	Usp1	FALSE	0.000539015	0.00975725	11.9756	-0.693164	NA	NA	NA	NA	NA	NA	NA	NA	NA
OBP	OBP_to_OB2	Usp14	FALSE	3.82e-09	1.83e-07	34.7131	-0.8028	NA	NA	NA	NA	NA	NA	NA	NA	NA
OBP	OBP_to_OB2	Ust	FALSE	1.05e-06	3.38e-05	23.8384	1.00426	NA	NA	NA	NA	NA	NA	NA	NA	NA
OBP	OBP_to_OB2	Utp14a	FALSE	0.00246969	0.0371343	9.16291	-0.666192	NA	NA	NA	NA	NA	NA	NA	NA	NA
OBP	OBP_to_OB2	Vamp5	FALSE	2.35e-05	0.000581855	17.8838	-1.07981	NA	NA	NA	NA	NA	NA	NA	NA	NA
OBP	OBP_to_OB2	Vasp	FALSE	1.42e-11	9.89e-10	45.6435	-0.860493	NA	NA	NA	NA	NA	NA	NA	NA	NA
OBP	OBP_to_OB2	Vcam1	FALSE	6.59e-05	0.00148215	15.9264	-0.881824	NA	NA	NA	NA	NA	NA	NA	NA	NA
OBP	OBP_to_OB2	Vcan	FALSE	9.78e-11	6.08e-09	41.8656	-1.61224	NA	NA	NA	NA	NA	NA	NA	NA	NA
OBP	OBP_to_OB2	Vcl	FALSE	0	0	196.188	-1.47269	NA	NA	NA	NA	NA	NA	NA	NA	NA
OBP	OBP_to_OB2	Vegfc	FALSE	2.79e-10	1.61e-08	39.8174	-1.80464	NA	NA	NA	NA	NA	NA	NA	NA	NA
OBP	OBP_to_OB2	Vgll3	FALSE	0	0	135.797	-2.09597	NA	NA	NA	NA	NA	NA	NA	NA	NA
OBP	OBP_to_OB2	Vim	FALSE	2.93e-10	1.69e-08	39.7189	-0.75087	NA	NA	NA	NA	NA	NA	NA	NA	NA
OBP	OBP_to_OB2	Vkorc1	FALSE	2.87e-09	1.39e-07	35.2675	0.695434	NA	NA	NA	NA	NA	NA	NA	NA	NA
OBP	OBP_to_OB2	Vldlr	FALSE	2.64e-05	0.000646988	17.6605	0.61681	NA	NA	NA	NA	NA	NA	NA	NA	NA
OBP	OBP_to_OB2	Vrk1	FALSE	0.00010879	0.00232159	14.9777	-0.915842	NA	NA	NA	NA	NA	NA	NA	NA	NA
OBP	OBP_to_OB2	Vstm4	FALSE	9.18e-05	0.00200463	15.2978	0.93047	NA	NA	NA	NA	NA	NA	NA	NA	NA
OBP	OBP_to_OB2	Wasl	FALSE	3.59e-10	2.03e-08	39.3235	0.819243	NA	NA	NA	NA	NA	NA	NA	NA	NA
OBP	OBP_to_OB2	Wdfy1	FALSE	1.26e-08	5.58e-07	32.3925	-0.962538	NA	NA	NA	NA	NA	NA	NA	NA	NA
OBP	OBP_to_OB2	Wdhd1	FALSE	0.000712346	0.0124211	11.4568	-1.25192	NA	NA	NA	NA	NA	NA	NA	NA	NA
OBP	OBP_to_OB2	Wdr12	FALSE	4.7e-11	3.04e-09	43.2981	-1.18002	NA	NA	NA	NA	NA	NA	NA	NA	NA
OBP	OBP_to_OB2	Wdr46	FALSE	0.00129502	0.0209575	10.3496	-0.818072	NA	NA	NA	NA	NA	NA	NA	NA	NA
OBP	OBP_to_OB2	Wdr62	FALSE	0.00320167	0.0466282	8.68882	-1.24055	NA	NA	NA	NA	NA	NA	NA	NA	NA
OBP	OBP_to_OB2	Wdr75	FALSE	2.83e-06	8.5e-05	21.9262	-0.821034	NA	NA	NA	NA	NA	NA	NA	NA	NA
OBP	OBP_to_OB2	Wdr77	FALSE	0.000506814	0.00920488	12.0904	-0.731233	NA	NA	NA	NA	NA	NA	NA	NA	NA
OBP	OBP_to_OB2	Wfdc17	FALSE	8.05e-06	0.000218503	19.9266	1.35589	NA	NA	NA	NA	NA	NA	NA	NA	NA
OBP	OBP_to_OB2	Wipf1	FALSE	6.14e-06	0.000170876	20.4451	-1.15163	NA	NA	NA	NA	NA	NA	NA	NA	NA
OBP	OBP_to_OB2	Wisp2	FALSE	0	0	116.838	-2.40782	NA	NA	NA	NA	NA	NA	NA	NA	NA
OBP	OBP_to_OB2	Wls	FALSE	0.00163961	0.0258443	9.91473	-0.521854	NA	NA	NA	NA	NA	NA	NA	NA	NA
OBP	OBP_to_OB2	Wnk4	FALSE	0.000648772	0.0114313	11.6306	1.36359	NA	NA	NA	NA	NA	NA	NA	NA	NA
OBP	OBP_to_OB2	Wnt5a	FALSE	1.11e-16	1.3e-14	69.2595	-1.47774	NA	NA	NA	NA	NA	NA	NA	NA	NA
OBP	OBP_to_OB2	Wscd2	FALSE	0.000151832	0.00315081	14.3493	1.60578	NA	NA	NA	NA	NA	NA	NA	NA	NA
OBP	OBP_to_OB2	Xpo1	FALSE	1.34e-06	4.29e-05	23.3582	-0.781802	NA	NA	NA	NA	NA	NA	NA	NA	NA
OBP	OBP_to_OB2	Ybx3	FALSE	4.38e-06	0.000125008	21.092	-0.632468	NA	NA	NA	NA	NA	NA	NA	NA	NA
OBP	OBP_to_OB2	Ydjc	FALSE	0.00325414	0.0472663	8.6592	-0.708243	NA	NA	NA	NA	NA	NA	NA	NA	NA
OBP	OBP_to_OB2	Ywhah	FALSE	1.31e-11	9.17e-10	45.8054	-0.873982	NA	NA	NA	NA	NA	NA	NA	NA	NA
OBP	OBP_to_OB2	Zbed5	FALSE	0.00107656	0.0178589	10.691	0.843103	NA	NA	NA	NA	NA	NA	NA	NA	NA
OBP	OBP_to_OB2	Zbtb7c	FALSE	2.42e-05	0.000597267	17.8254	0.982005	NA	NA	NA	NA	NA	NA	NA	NA	NA
OBP	OBP_to_OB2	Zc2hc1a	FALSE	1.58e-08	6.93e-07	31.9466	-1.00642	NA	NA	NA	NA	NA	NA	NA	NA	NA
OBP	OBP_to_OB2	Zdhhc14	FALSE	2.04e-09	1.02e-07	35.9313	1.52573	NA	NA	NA	NA	NA	NA	NA	NA	NA
OBP	OBP_to_OB2	Zdhhc15	FALSE	0.000252581	0.00491014	13.3929	-2.07526	NA	NA	NA	NA	NA	NA	NA	NA	NA
OBP	OBP_to_OB2	Zeb2	FALSE	0	0	106.077	-0.999572	NA	NA	NA	NA	NA	NA	NA	NA	NA
OBP	OBP_to_OB2	Zfhx4	FALSE	5.47e-12	4.01e-10	47.5113	-0.989297	NA	NA	NA	NA	NA	NA	NA	NA	NA
OBP	OBP_to_OB2	Zfp239	FALSE	0.00342888	0.0494424	8.56393	-0.985183	NA	NA	NA	NA	NA	NA	NA	NA	NA
OBP	OBP_to_OB2	Zfp36l2	FALSE	0.000332393	0.00631547	12.8784	-0.656488	NA	NA	NA	NA	NA	NA	NA	NA	NA
OBP	OBP_to_OB2	Zfp385b	FALSE	1.16e-08	5.17e-07	32.5499	1.68624	NA	NA	NA	NA	NA	NA	NA	NA	NA
OBP	OBP_to_OB2	Zfp423	FALSE	0.00147618	0.0236265	10.1081	-1.03071	NA	NA	NA	NA	NA	NA	NA	NA	NA
OBP	OBP_to_OB2	Zfp469	FALSE	0.000174269	0.00356558	14.09	0.781644	NA	NA	NA	NA	NA	NA	NA	NA	NA
OBP	OBP_to_OB2	Zfp503	FALSE	1.05e-14	1.01e-12	59.7822	-1.77657	NA	NA	NA	NA	NA	NA	NA	NA	NA
OBP	OBP_to_OB2	Zfp575	FALSE	0.00103361	0.0172514	10.7664	-2.06858	NA	NA	NA	NA	NA	NA	NA	NA	NA
OBP	OBP_to_OB2	Zfpm2	FALSE	0.000169103	0.00347024	14.1466	-1.93332	NA	NA	NA	NA	NA	NA	NA	NA	NA
OBP	OBP_to_OB2	Zwilch	FALSE	5.5e-05	0.00125949	16.2661	-1.34618	NA	NA	NA	NA	NA	NA	NA	NA	NA

## Sheet: Supplementary File 2d
cell_type	cell_type_boundary	Gene	DO_eQTL_eGene	Pvalue_trajectory3	Pvalue_adj_trajectory3	waldStat_trajectory3	logFC_trajectory3	chr	pos	lod	ci_lo	ci_hi	Strand	Start	End	dist_start
LMP	LMP_to_MALP	Clic4	TRUE	1.67e-07	1.63e-05	27.3769	0.714235	4	135.113	10.7609	134.744	137.089	-	135213969	135272814	100563
LMP	LMP_to_MALP	Col2a1	TRUE	0.000191806	0.00887142	13.9097	1.9344	15	97.9659	9.74439	97.5082	98.5159	-	97975602	98004695	9700
LMP	LMP_to_MALP	Cyb5a	TRUE	0.00060402	0.0232974	11.7635	0.620237	18	84.1976	11.8168	84.0529	84.4245	+	84838704	84879871	641153
LMP	LMP_to_MALP	F2r	TRUE	3.7e-14	7.69e-12	57.3215	1.9173	13	95.6406	12.1729	93.9554	95.982	-	95601803	95618487	38847
LMP	LMP_to_MALP	Grb14	TRUE	9.71e-07	8.12e-05	23.9844	0.876542	2	65.092	13.1231	64.8161	65.4802	-	64912476	65024987	179488
LMP	LMP_to_MALP	Maob	TRUE	5.18e-07	4.69e-05	25.1961	1.93214	X	16.7855	10.3341	16.7833	16.9979	-	16709282	16817366	76214
LMP	LMP_to_MALP	Tns1	TRUE	1.11e-16	3.19e-14	68.8817	2.22006	1	74.1892	10.8554	74.1297	74.8204	-	73910231	74124449	278922
LMP	LMP_to_MALP	1500009L16Rik	FALSE	0	0	70.68	1.34366	NA	NA	NA	NA	NA	NA	NA	NA	NA
LMP	LMP_to_MALP	1700020I14Rik	FALSE	0.000187239	0.00871558	13.955	0.645515	NA	NA	NA	NA	NA	NA	NA	NA	NA
LMP	LMP_to_MALP	1700029I15Rik	FALSE	2.21e-07	2.11e-05	26.8435	0.713725	NA	NA	NA	NA	NA	NA	NA	NA	NA
LMP	LMP_to_MALP	1810037I17Rik	FALSE	0.000349422	0.0148699	12.7849	0.575252	NA	NA	NA	NA	NA	NA	NA	NA	NA
LMP	LMP_to_MALP	2900026A02Rik	FALSE	9.07e-05	0.00469296	15.3212	0.855328	NA	NA	NA	NA	NA	NA	NA	NA	NA
LMP	LMP_to_MALP	4732471J01Rik	FALSE	0.00128513	0.0437686	10.3638	0.702701	NA	NA	NA	NA	NA	NA	NA	NA	NA
LMP	LMP_to_MALP	4930523C07Rik	FALSE	5.06e-12	8.12e-10	47.6646	1.11828	NA	NA	NA	NA	NA	NA	NA	NA	NA
LMP	LMP_to_MALP	Abat	FALSE	0.000613033	0.0235618	11.736	1.58658	NA	NA	NA	NA	NA	NA	NA	NA	NA
LMP	LMP_to_MALP	Abi3bp	FALSE	7.77e-06	0.00053999	19.9944	1.66876	NA	NA	NA	NA	NA	NA	NA	NA	NA
LMP	LMP_to_MALP	Abracl	FALSE	0.000377899	0.0157463	12.6384	0.599141	NA	NA	NA	NA	NA	NA	NA	NA	NA
LMP	LMP_to_MALP	Acadsb	FALSE	9.07e-05	0.00469296	15.3207	0.826489	NA	NA	NA	NA	NA	NA	NA	NA	NA
LMP	LMP_to_MALP	Ackr4	FALSE	1.62e-14	3.69e-12	58.945	1.44687	NA	NA	NA	NA	NA	NA	NA	NA	NA
LMP	LMP_to_MALP	Acta2	FALSE	0	0	89.4506	1.59916	NA	NA	NA	NA	NA	NA	NA	NA	NA
LMP	LMP_to_MALP	Actb	FALSE	0.000794507	0.0293428	11.254	0.501997	NA	NA	NA	NA	NA	NA	NA	NA	NA
LMP	LMP_to_MALP	Actg1	FALSE	1.05e-10	1.51e-08	41.7256	0.70305	NA	NA	NA	NA	NA	NA	NA	NA	NA
LMP	LMP_to_MALP	Actg2	FALSE	2.71e-13	5.19e-11	53.4083	1.93969	NA	NA	NA	NA	NA	NA	NA	NA	NA
LMP	LMP_to_MALP	Actn1	FALSE	0	0	84.793	0.974303	NA	NA	NA	NA	NA	NA	NA	NA	NA
LMP	LMP_to_MALP	Actn3	FALSE	0.000643534	0.0245612	11.6456	1.0842	NA	NA	NA	NA	NA	NA	NA	NA	NA
LMP	LMP_to_MALP	Actn4	FALSE	8.93e-09	1.03e-06	33.0606	0.710379	NA	NA	NA	NA	NA	NA	NA	NA	NA
LMP	LMP_to_MALP	Actr3	FALSE	0.000595942	0.0230674	11.7886	0.541291	NA	NA	NA	NA	NA	NA	NA	NA	NA
LMP	LMP_to_MALP	Adam9	FALSE	0.000264419	0.0116853	13.307	0.761158	NA	NA	NA	NA	NA	NA	NA	NA	NA
LMP	LMP_to_MALP	Adamts1	FALSE	0	0	92.0257	1.47601	NA	NA	NA	NA	NA	NA	NA	NA	NA
LMP	LMP_to_MALP	Adamts4	FALSE	0.00104852	0.0369169	10.7399	0.972321	NA	NA	NA	NA	NA	NA	NA	NA	NA
LMP	LMP_to_MALP	Adamts5	FALSE	2.77e-06	0.000208907	21.9727	1.13583	NA	NA	NA	NA	NA	NA	NA	NA	NA
LMP	LMP_to_MALP	Adcy2	FALSE	0.000206447	0.00944853	13.7715	1.2498	NA	NA	NA	NA	NA	NA	NA	NA	NA
LMP	LMP_to_MALP	Adgrf5	FALSE	1.11e-16	3.19e-14	68.3275	1.36633	NA	NA	NA	NA	NA	NA	NA	NA	NA
LMP	LMP_to_MALP	Adgrl2	FALSE	0.000271506	0.0119501	13.2574	0.868323	NA	NA	NA	NA	NA	NA	NA	NA	NA
LMP	LMP_to_MALP	Adipoq	FALSE	6.93e-11	1e-08	42.5375	-1.45775	NA	NA	NA	NA	NA	NA	NA	NA	NA
LMP	LMP_to_MALP	Adm	FALSE	1.64e-06	0.000130503	22.9792	1.07822	NA	NA	NA	NA	NA	NA	NA	NA	NA
LMP	LMP_to_MALP	Aebp1	FALSE	3.55e-15	8.81e-13	61.9048	0.989383	NA	NA	NA	NA	NA	NA	NA	NA	NA
LMP	LMP_to_MALP	Agbl3	FALSE	6.4e-05	0.00348331	15.981	0.961236	NA	NA	NA	NA	NA	NA	NA	NA	NA
LMP	LMP_to_MALP	Ahcyl1	FALSE	0.000628221	0.0240187	11.6904	0.606461	NA	NA	NA	NA	NA	NA	NA	NA	NA
LMP	LMP_to_MALP	AI314180	FALSE	0.000175654	0.00826445	14.0751	0.716764	NA	NA	NA	NA	NA	NA	NA	NA	NA
LMP	LMP_to_MALP	Akap11	FALSE	0.000568013	0.0222228	11.878	0.76632	NA	NA	NA	NA	NA	NA	NA	NA	NA
LMP	LMP_to_MALP	Akap12	FALSE	1.63e-10	2.28e-08	40.8707	1.50121	NA	NA	NA	NA	NA	NA	NA	NA	NA
LMP	LMP_to_MALP	Amotl2	FALSE	2.15e-14	4.7e-12	58.3818	1.048	NA	NA	NA	NA	NA	NA	NA	NA	NA
LMP	LMP_to_MALP	Angpt1	FALSE	7.52e-07	6.51e-05	24.4771	1.24502	NA	NA	NA	NA	NA	NA	NA	NA	NA
LMP	LMP_to_MALP	Angpt2	FALSE	0.00116982	0.0404089	10.5374	1.12793	NA	NA	NA	NA	NA	NA	NA	NA	NA
LMP	LMP_to_MALP	Antxr1	FALSE	0	0	72.1184	1.0746	NA	NA	NA	NA	NA	NA	NA	NA	NA
LMP	LMP_to_MALP	Anxa1	FALSE	1.3e-05	0.000849188	19.0117	0.642498	NA	NA	NA	NA	NA	NA	NA	NA	NA
LMP	LMP_to_MALP	Anxa6	FALSE	5.55e-12	8.85e-10	47.4818	0.922079	NA	NA	NA	NA	NA	NA	NA	NA	NA
LMP	LMP_to_MALP	Anxa8	FALSE	8.97e-06	0.000613623	19.7199	-1.73864	NA	NA	NA	NA	NA	NA	NA	NA	NA
LMP	LMP_to_MALP	Aoc3	FALSE	8.63e-10	1.1e-07	37.6121	1.67272	NA	NA	NA	NA	NA	NA	NA	NA	NA
LMP	LMP_to_MALP	Apbb1ip	FALSE	0.00090215	0.0326614	11.0183	1.29109	NA	NA	NA	NA	NA	NA	NA	NA	NA
LMP	LMP_to_MALP	Apln	FALSE	0.000158221	0.00754176	14.2718	1.01924	NA	NA	NA	NA	NA	NA	NA	NA	NA
LMP	LMP_to_MALP	Aplp2	FALSE	1.68e-09	2.06e-07	36.3105	0.73623	NA	NA	NA	NA	NA	NA	NA	NA	NA
LMP	LMP_to_MALP	Apoc1	FALSE	1.73e-05	0.00107932	18.4687	1.18071	NA	NA	NA	NA	NA	NA	NA	NA	NA
LMP	LMP_to_MALP	App	FALSE	0.000212729	0.00969539	13.7152	0.614133	NA	NA	NA	NA	NA	NA	NA	NA	NA
LMP	LMP_to_MALP	Aqp1	FALSE	1.2e-05	0.000791197	19.1697	-0.955889	NA	NA	NA	NA	NA	NA	NA	NA	NA
LMP	LMP_to_MALP	Arhgap29	FALSE	9.17e-06	0.000625303	19.6779	1.02735	NA	NA	NA	NA	NA	NA	NA	NA	NA
LMP	LMP_to_MALP	Arhgef25	FALSE	0.000140647	0.00686903	14.4935	0.779036	NA	NA	NA	NA	NA	NA	NA	NA	NA
LMP	LMP_to_MALP	Arid5b	FALSE	0.000115134	0.00580484	14.8708	0.706037	NA	NA	NA	NA	NA	NA	NA	NA	NA
LMP	LMP_to_MALP	Arl5a	FALSE	7.46e-06	0.000520568	20.0706	0.84989	NA	NA	NA	NA	NA	NA	NA	NA	NA
LMP	LMP_to_MALP	Arl6ip1	FALSE	2.19e-05	0.00134964	18.0178	0.768238	NA	NA	NA	NA	NA	NA	NA	NA	NA
LMP	LMP_to_MALP	Arrdc4	FALSE	1.88e-06	0.000148852	22.712	0.837063	NA	NA	NA	NA	NA	NA	NA	NA	NA
LMP	LMP_to_MALP	Arxes1	FALSE	2.51e-06	0.000192291	22.1586	2.0539	NA	NA	NA	NA	NA	NA	NA	NA	NA
LMP	LMP_to_MALP	Arxes2	FALSE	1.02e-11	1.59e-09	46.2921	1.76569	NA	NA	NA	NA	NA	NA	NA	NA	NA
LMP	LMP_to_MALP	Asph	FALSE	5.07e-09	5.92e-07	34.1636	0.889969	NA	NA	NA	NA	NA	NA	NA	NA	NA
LMP	LMP_to_MALP	Aspn	FALSE	0	0	93.7828	1.98606	NA	NA	NA	NA	NA	NA	NA	NA	NA
LMP	LMP_to_MALP	Atl3	FALSE	2.67e-06	0.000202183	22.0422	0.806617	NA	NA	NA	NA	NA	NA	NA	NA	NA
LMP	LMP_to_MALP	Atp2b4	FALSE	0.00068572	0.0258549	11.5276	0.870561	NA	NA	NA	NA	NA	NA	NA	NA	NA
LMP	LMP_to_MALP	Atp6v1a	FALSE	5.8e-07	5.17e-05	24.976	0.779277	NA	NA	NA	NA	NA	NA	NA	NA	NA
LMP	LMP_to_MALP	Atp8b1	FALSE	6.72e-05	0.00361501	15.8873	1.91399	NA	NA	NA	NA	NA	NA	NA	NA	NA
LMP	LMP_to_MALP	Atrx	FALSE	0.000747614	0.0278994	11.367	0.60821	NA	NA	NA	NA	NA	NA	NA	NA	NA
LMP	LMP_to_MALP	Atxn1	FALSE	0.000834799	0.030578	11.1622	0.853667	NA	NA	NA	NA	NA	NA	NA	NA	NA
LMP	LMP_to_MALP	Baiap2l2	FALSE	0.000682701	0.0257855	11.5358	-1.42002	NA	NA	NA	NA	NA	NA	NA	NA	NA
LMP	LMP_to_MALP	Basp1	FALSE	1.55e-10	2.19e-08	40.9611	0.877763	NA	NA	NA	NA	NA	NA	NA	NA	NA
LMP	LMP_to_MALP	Bbx	FALSE	0.000277173	0.012146	13.2187	0.750814	NA	NA	NA	NA	NA	NA	NA	NA	NA
LMP	LMP_to_MALP	Bcl9l	FALSE	0.000431678	0.0177142	12.3898	0.745476	NA	NA	NA	NA	NA	NA	NA	NA	NA
LMP	LMP_to_MALP	Bglap	FALSE	5.94e-05	0.00324982	16.1218	-0.788629	NA	NA	NA	NA	NA	NA	NA	NA	NA
LMP	LMP_to_MALP	Bglap2	FALSE	0.000661487	0.0251584	11.5945	-0.795453	NA	NA	NA	NA	NA	NA	NA	NA	NA
LMP	LMP_to_MALP	Bgn	FALSE	1.11e-16	3.19e-14	68.2765	0.819141	NA	NA	NA	NA	NA	NA	NA	NA	NA
LMP	LMP_to_MALP	Bicc1	FALSE	0.000283587	0.0123437	13.1758	0.592729	NA	NA	NA	NA	NA	NA	NA	NA	NA
LMP	LMP_to_MALP	Bmp3	FALSE	1.03e-07	1.02e-05	28.3152	-1.06703	NA	NA	NA	NA	NA	NA	NA	NA	NA
LMP	LMP_to_MALP	Bmp4	FALSE	7.53e-10	9.62e-08	37.8774	1.32524	NA	NA	NA	NA	NA	NA	NA	NA	NA
LMP	LMP_to_MALP	Bmp5	FALSE	1.9e-07	1.82e-05	27.1365	1.03692	NA	NA	NA	NA	NA	NA	NA	NA	NA
LMP	LMP_to_MALP	Bmp8b	FALSE	0.000425501	0.0175266	12.4167	-1.90028	NA	NA	NA	NA	NA	NA	NA	NA	NA
LMP	LMP_to_MALP	Bok	FALSE	0.000414815	0.0171187	12.4643	0.760958	NA	NA	NA	NA	NA	NA	NA	NA	NA
LMP	LMP_to_MALP	Btg2	FALSE	3.51e-06	0.000259845	21.5148	0.695739	NA	NA	NA	NA	NA	NA	NA	NA	NA
LMP	LMP_to_MALP	C1s1	FALSE	3.65e-05	0.00213067	17.0451	2.05645	NA	NA	NA	NA	NA	NA	NA	NA	NA
LMP	LMP_to_MALP	C4b	FALSE	2.03e-06	0.000159355	22.5671	1.5773	NA	NA	NA	NA	NA	NA	NA	NA	NA
LMP	LMP_to_MALP	Cadm1	FALSE	0	0	107.212	-1.69666	NA	NA	NA	NA	NA	NA	NA	NA	NA
LMP	LMP_to_MALP	Cald1	FALSE	0	0	250.572	1.15868	NA	NA	NA	NA	NA	NA	NA	NA	NA
LMP	LMP_to_MALP	Calu	FALSE	0.000716806	0.0268415	11.4452	0.526121	NA	NA	NA	NA	NA	NA	NA	NA	NA
LMP	LMP_to_MALP	Car12	FALSE	6.24e-07	5.54e-05	24.8358	-1.21182	NA	NA	NA	NA	NA	NA	NA	NA	NA
LMP	LMP_to_MALP	Cavin1	FALSE	2.04e-06	0.000159671	22.5564	0.69391	NA	NA	NA	NA	NA	NA	NA	NA	NA
LMP	LMP_to_MALP	Cavin2	FALSE	0.000149421	0.00718506	14.3795	1.87705	NA	NA	NA	NA	NA	NA	NA	NA	NA
LMP	LMP_to_MALP	Cavin3	FALSE	1.36e-05	0.000878393	18.9245	0.669984	NA	NA	NA	NA	NA	NA	NA	NA	NA
LMP	LMP_to_MALP	Cblb	FALSE	0.000980232	0.0350236	10.8645	0.771683	NA	NA	NA	NA	NA	NA	NA	NA	NA
LMP	LMP_to_MALP	Ccdc102a	FALSE	5.08e-05	0.00283679	16.4177	1.20622	NA	NA	NA	NA	NA	NA	NA	NA	NA
LMP	LMP_to_MALP	Ccdc80	FALSE	0	0	75.2776	1.00133	NA	NA	NA	NA	NA	NA	NA	NA	NA
LMP	LMP_to_MALP	Ccl7	FALSE	0.000193163	0.00891532	13.8964	1.45874	NA	NA	NA	NA	NA	NA	NA	NA	NA
LMP	LMP_to_MALP	Ccng2	FALSE	1.14e-06	9.36e-05	23.683	1.15304	NA	NA	NA	NA	NA	NA	NA	NA	NA
LMP	LMP_to_MALP	Cd248	FALSE	4.29e-06	0.000311993	21.1319	1.56942	NA	NA	NA	NA	NA	NA	NA	NA	NA
LMP	LMP_to_MALP	Cd81	FALSE	0.00112206	0.039256	10.6145	0.492338	NA	NA	NA	NA	NA	NA	NA	NA	NA
LMP	LMP_to_MALP	Cdc42bpa	FALSE	0.000351541	0.0149309	12.7736	0.697315	NA	NA	NA	NA	NA	NA	NA	NA	NA
LMP	LMP_to_MALP	Cdk14	FALSE	0.000251111	0.011192	13.4038	0.696097	NA	NA	NA	NA	NA	NA	NA	NA	NA
LMP	LMP_to_MALP	Cdkn2b	FALSE	0.000565398	0.0222	11.8866	0.785363	NA	NA	NA	NA	NA	NA	NA	NA	NA
LMP	LMP_to_MALP	Cfd	FALSE	1.11e-16	3.19e-14	68.5782	-3.68792	NA	NA	NA	NA	NA	NA	NA	NA	NA
LMP	LMP_to_MALP	Cgref1	FALSE	7.01e-10	9.06e-08	38.0179	-1.03502	NA	NA	NA	NA	NA	NA	NA	NA	NA
LMP	LMP_to_MALP	Chchd10	FALSE	3.9e-05	0.00226467	16.9192	-1.50347	NA	NA	NA	NA	NA	NA	NA	NA	NA
LMP	LMP_to_MALP	Chd3	FALSE	1.04e-05	0.000696734	19.4357	0.80238	NA	NA	NA	NA	NA	NA	NA	NA	NA
LMP	LMP_to_MALP	Chd6	FALSE	0.000368086	0.0154532	12.6876	0.746196	NA	NA	NA	NA	NA	NA	NA	NA	NA
LMP	LMP_to_MALP	Chst13	FALSE	8.01e-07	6.86e-05	24.3554	-1.87099	NA	NA	NA	NA	NA	NA	NA	NA	NA
LMP	LMP_to_MALP	Cited2	FALSE	1.08e-10	1.54e-08	41.6732	0.931699	NA	NA	NA	NA	NA	NA	NA	NA	NA
LMP	LMP_to_MALP	Clasp2	FALSE	0.000134011	0.00658915	14.5845	0.813774	NA	NA	NA	NA	NA	NA	NA	NA	NA
LMP	LMP_to_MALP	Clec11a	FALSE	0.000123863	0.00618776	14.7329	0.740831	NA	NA	NA	NA	NA	NA	NA	NA	NA
LMP	LMP_to_MALP	Cnn1	FALSE	3.14e-14	6.66e-12	57.6457	2.43051	NA	NA	NA	NA	NA	NA	NA	NA	NA
LMP	LMP_to_MALP	Cnn2	FALSE	3.22e-12	5.45e-10	48.5512	0.822625	NA	NA	NA	NA	NA	NA	NA	NA	NA
LMP	LMP_to_MALP	Cnn3	FALSE	1.11e-16	3.19e-14	69.5431	0.970473	NA	NA	NA	NA	NA	NA	NA	NA	NA
LMP	LMP_to_MALP	Col11a2	FALSE	5.12e-07	4.66e-05	25.2163	-1.05906	NA	NA	NA	NA	NA	NA	NA	NA	NA
LMP	LMP_to_MALP	Col12a1	FALSE	1.11e-16	3.19e-14	69.3602	1.18187	NA	NA	NA	NA	NA	NA	NA	NA	NA
LMP	LMP_to_MALP	Col16a1	FALSE	0.000257257	0.0114382	13.3585	0.939232	NA	NA	NA	NA	NA	NA	NA	NA	NA
LMP	LMP_to_MALP	Col18a1	FALSE	1.53e-05	0.000979482	18.6998	1.52003	NA	NA	NA	NA	NA	NA	NA	NA	NA
LMP	LMP_to_MALP	Col1a1	FALSE	5.36e-06	0.00037733	20.7048	-0.622082	NA	NA	NA	NA	NA	NA	NA	NA	NA
LMP	LMP_to_MALP	Col3a1	FALSE	0	0	99.3124	1.46788	NA	NA	NA	NA	NA	NA	NA	NA	NA
LMP	LMP_to_MALP	Col4a1	FALSE	0	0	90.0136	1.69115	NA	NA	NA	NA	NA	NA	NA	NA	NA
LMP	LMP_to_MALP	Col4a2	FALSE	0	0	75.4627	1.86037	NA	NA	NA	NA	NA	NA	NA	NA	NA
LMP	LMP_to_MALP	Col4a3bp	FALSE	0.000186237	0.00870607	13.9651	0.833503	NA	NA	NA	NA	NA	NA	NA	NA	NA
LMP	LMP_to_MALP	Col5a3	FALSE	0.00019639	0.00904514	13.8653	1.76992	NA	NA	NA	NA	NA	NA	NA	NA	NA
LMP	LMP_to_MALP	Col6a1	FALSE	0	0	141.018	1.25292	NA	NA	NA	NA	NA	NA	NA	NA	NA
LMP	LMP_to_MALP	Col6a2	FALSE	0	0	94.2998	1.14898	NA	NA	NA	NA	NA	NA	NA	NA	NA
LMP	LMP_to_MALP	Col6a3	FALSE	0	0	84.7311	1.09624	NA	NA	NA	NA	NA	NA	NA	NA	NA
LMP	LMP_to_MALP	Col8a1	FALSE	0	0	144.505	1.65714	NA	NA	NA	NA	NA	NA	NA	NA	NA
LMP	LMP_to_MALP	Col8a2	FALSE	1.88e-05	0.00116799	18.3039	1.57306	NA	NA	NA	NA	NA	NA	NA	NA	NA
LMP	LMP_to_MALP	Colec12	FALSE	7e-07	6.09e-05	24.6142	0.737812	NA	NA	NA	NA	NA	NA	NA	NA	NA
LMP	LMP_to_MALP	Cox6b2	FALSE	0.00068136	0.0257795	11.5394	1.02647	NA	NA	NA	NA	NA	NA	NA	NA	NA
LMP	LMP_to_MALP	Cpd	FALSE	0.000461237	0.018751	12.2662	0.714998	NA	NA	NA	NA	NA	NA	NA	NA	NA
LMP	LMP_to_MALP	Cpxm1	FALSE	2.19e-06	0.000169512	22.421	1.26595	NA	NA	NA	NA	NA	NA	NA	NA	NA
LMP	LMP_to_MALP	Creb3l1	FALSE	7.05e-05	0.00377185	15.7976	-0.621517	NA	NA	NA	NA	NA	NA	NA	NA	NA
LMP	LMP_to_MALP	Crim1	FALSE	1.17e-11	1.82e-09	46.0144	1.54539	NA	NA	NA	NA	NA	NA	NA	NA	NA
LMP	LMP_to_MALP	Crispld2	FALSE	0.000288586	0.0125251	13.1431	1.8783	NA	NA	NA	NA	NA	NA	NA	NA	NA
LMP	LMP_to_MALP	Crlf1	FALSE	2.22e-16	6.14e-14	67.1478	1.48716	NA	NA	NA	NA	NA	NA	NA	NA	NA
LMP	LMP_to_MALP	Csf1	FALSE	0.000155185	0.00741324	14.3082	0.676411	NA	NA	NA	NA	NA	NA	NA	NA	NA
LMP	LMP_to_MALP	Cspg4	FALSE	0.000248296	0.0111077	13.425	-0.928496	NA	NA	NA	NA	NA	NA	NA	NA	NA
LMP	LMP_to_MALP	Csrp1	FALSE	0	0	72.309	1.02874	NA	NA	NA	NA	NA	NA	NA	NA	NA
LMP	LMP_to_MALP	Csrp2	FALSE	0.000226252	0.0102263	13.5994	0.678052	NA	NA	NA	NA	NA	NA	NA	NA	NA
LMP	LMP_to_MALP	Ctgf	FALSE	0	0	71.6996	1.21509	NA	NA	NA	NA	NA	NA	NA	NA	NA
LMP	LMP_to_MALP	Ctla2a	FALSE	2.03e-08	2.24e-06	31.4704	2.07243	NA	NA	NA	NA	NA	NA	NA	NA	NA
LMP	LMP_to_MALP	Ctnnd1	FALSE	0	0	92.093	1.12452	NA	NA	NA	NA	NA	NA	NA	NA	NA
LMP	LMP_to_MALP	Ctxn1	FALSE	0.000795701	0.0293428	11.2512	0.941344	NA	NA	NA	NA	NA	NA	NA	NA	NA
LMP	LMP_to_MALP	Cygb	FALSE	8.75e-07	7.43e-05	24.1861	1.84754	NA	NA	NA	NA	NA	NA	NA	NA	NA
LMP	LMP_to_MALP	Cyp1b1	FALSE	7.33e-14	1.47e-11	55.9785	1.2188	NA	NA	NA	NA	NA	NA	NA	NA	NA
LMP	LMP_to_MALP	Cyp26b1	FALSE	6.6e-11	9.61e-09	42.634	1.34936	NA	NA	NA	NA	NA	NA	NA	NA	NA
LMP	LMP_to_MALP	Cyp4v3	FALSE	0.0002082	0.00950881	13.7556	0.96486	NA	NA	NA	NA	NA	NA	NA	NA	NA
LMP	LMP_to_MALP	Cyr61	FALSE	2.61e-05	0.00156717	17.6857	0.612331	NA	NA	NA	NA	NA	NA	NA	NA	NA
LMP	LMP_to_MALP	Dact3	FALSE	0.000292906	0.0126623	13.1152	1.09691	NA	NA	NA	NA	NA	NA	NA	NA	NA
LMP	LMP_to_MALP	Dclk1	FALSE	5.71e-14	1.16e-11	56.4695	1.27918	NA	NA	NA	NA	NA	NA	NA	NA	NA
LMP	LMP_to_MALP	Ddah1	FALSE	1.78e-09	2.17e-07	36.2048	1.05402	NA	NA	NA	NA	NA	NA	NA	NA	NA
LMP	LMP_to_MALP	Ddr2	FALSE	0.000475573	0.0191908	12.2091	0.618746	NA	NA	NA	NA	NA	NA	NA	NA	NA
LMP	LMP_to_MALP	Ddx58	FALSE	0.000411802	0.0170266	12.4779	1.20268	NA	NA	NA	NA	NA	NA	NA	NA	NA
LMP	LMP_to_MALP	Dhdh	FALSE	3.06e-08	3.29e-06	30.6672	0.568996	NA	NA	NA	NA	NA	NA	NA	NA	NA
LMP	LMP_to_MALP	Dhrs3	FALSE	0	0	71.3756	1.63753	NA	NA	NA	NA	NA	NA	NA	NA	NA
LMP	LMP_to_MALP	Diaph3	FALSE	0.000520126	0.0207206	12.0421	1.43512	NA	NA	NA	NA	NA	NA	NA	NA	NA
LMP	LMP_to_MALP	Dkk3	FALSE	3.65e-06	0.000268428	21.4394	0.929429	NA	NA	NA	NA	NA	NA	NA	NA	NA
LMP	LMP_to_MALP	Dlg5	FALSE	1.35e-05	0.00087408	18.9395	0.931265	NA	NA	NA	NA	NA	NA	NA	NA	NA
LMP	LMP_to_MALP	Dlx3	FALSE	0.000770286	0.0285914	11.3115	-1.20697	NA	NA	NA	NA	NA	NA	NA	NA	NA
LMP	LMP_to_MALP	Dmp1	FALSE	0	0	129.843	-2.21162	NA	NA	NA	NA	NA	NA	NA	NA	NA
LMP	LMP_to_MALP	Dnajb4	FALSE	2.1e-06	0.000163885	22.4995	0.780304	NA	NA	NA	NA	NA	NA	NA	NA	NA
LMP	LMP_to_MALP	Dnajc10	FALSE	2.43e-05	0.00147485	17.8169	0.693224	NA	NA	NA	NA	NA	NA	NA	NA	NA
LMP	LMP_to_MALP	Dpep1	FALSE	0	0	89.9284	1.32869	NA	NA	NA	NA	NA	NA	NA	NA	NA
LMP	LMP_to_MALP	Dpysl3	FALSE	6e-08	6.2e-06	29.365	0.806556	NA	NA	NA	NA	NA	NA	NA	NA	NA
LMP	LMP_to_MALP	Drd4	FALSE	0.00010897	0.0055453	14.9746	-2.17547	NA	NA	NA	NA	NA	NA	NA	NA	NA
LMP	LMP_to_MALP	Dse	FALSE	4.41e-05	0.00249386	16.6865	0.768834	NA	NA	NA	NA	NA	NA	NA	NA	NA
LMP	LMP_to_MALP	Dstn	FALSE	2.22e-16	6.14e-14	67.7137	0.812539	NA	NA	NA	NA	NA	NA	NA	NA	NA
LMP	LMP_to_MALP	Dusp14	FALSE	0.000985304	0.03509	10.855	-1.25431	NA	NA	NA	NA	NA	NA	NA	NA	NA
LMP	LMP_to_MALP	Dynap	FALSE	6.21e-12	9.82e-10	47.2627	-3.34367	NA	NA	NA	NA	NA	NA	NA	NA	NA
LMP	LMP_to_MALP	Dynlt3	FALSE	2.72e-08	2.97e-06	30.8974	0.707486	NA	NA	NA	NA	NA	NA	NA	NA	NA
LMP	LMP_to_MALP	Ebf1	FALSE	3.56e-14	7.48e-12	57.3977	0.913039	NA	NA	NA	NA	NA	NA	NA	NA	NA
LMP	LMP_to_MALP	Ece1	FALSE	0.000763039	0.0284264	11.3291	0.70167	NA	NA	NA	NA	NA	NA	NA	NA	NA
LMP	LMP_to_MALP	Edil3	FALSE	2.78e-11	4.16e-09	44.3239	1.52452	NA	NA	NA	NA	NA	NA	NA	NA	NA
LMP	LMP_to_MALP	Edn1	FALSE	0.000587468	0.0229018	11.8153	1.82076	NA	NA	NA	NA	NA	NA	NA	NA	NA
LMP	LMP_to_MALP	Ednra	FALSE	0.00113653	0.0395718	10.5908	1.21094	NA	NA	NA	NA	NA	NA	NA	NA	NA
LMP	LMP_to_MALP	Efemp2	FALSE	5.91e-10	7.77e-08	38.3506	0.737472	NA	NA	NA	NA	NA	NA	NA	NA	NA
LMP	LMP_to_MALP	Efna5	FALSE	4.43e-06	0.000320422	21.0681	1.16509	NA	NA	NA	NA	NA	NA	NA	NA	NA
LMP	LMP_to_MALP	Efnb1	FALSE	4.29e-05	0.00244564	16.739	0.708084	NA	NA	NA	NA	NA	NA	NA	NA	NA
LMP	LMP_to_MALP	Egln1	FALSE	0.000294722	0.0126655	13.1036	0.679251	NA	NA	NA	NA	NA	NA	NA	NA	NA
LMP	LMP_to_MALP	Egln3	FALSE	0.00012547	0.00625371	14.7086	0.916349	NA	NA	NA	NA	NA	NA	NA	NA	NA
LMP	LMP_to_MALP	Ehd2	FALSE	3.65e-07	3.41e-05	25.8685	0.871247	NA	NA	NA	NA	NA	NA	NA	NA	NA
LMP	LMP_to_MALP	Ehd3	FALSE	1.42e-12	2.48e-10	50.1577	0.990582	NA	NA	NA	NA	NA	NA	NA	NA	NA
LMP	LMP_to_MALP	Eid1	FALSE	0.000561938	0.0221039	11.898	0.562968	NA	NA	NA	NA	NA	NA	NA	NA	NA
LMP	LMP_to_MALP	Elf1	FALSE	0.000109877	0.00556549	14.9589	0.893217	NA	NA	NA	NA	NA	NA	NA	NA	NA
LMP	LMP_to_MALP	Emc2	FALSE	3.11e-12	5.32e-10	48.6182	0.874571	NA	NA	NA	NA	NA	NA	NA	NA	NA
LMP	LMP_to_MALP	Emp1	FALSE	0.000363312	0.0153117	12.712	0.637758	NA	NA	NA	NA	NA	NA	NA	NA	NA
LMP	LMP_to_MALP	Enah	FALSE	2.56e-14	5.54e-12	58.0453	0.93112	NA	NA	NA	NA	NA	NA	NA	NA	NA
LMP	LMP_to_MALP	Enpp4	FALSE	2.57e-06	0.000195233	22.116	1.15867	NA	NA	NA	NA	NA	NA	NA	NA	NA
LMP	LMP_to_MALP	Epas1	FALSE	2.18e-06	0.000169512	22.4254	1.04191	NA	NA	NA	NA	NA	NA	NA	NA	NA
LMP	LMP_to_MALP	Epb41l3	FALSE	0.00135081	0.0458623	10.2718	0.85304	NA	NA	NA	NA	NA	NA	NA	NA	NA
LMP	LMP_to_MALP	Esyt2	FALSE	0	0	73.0567	1.16699	NA	NA	NA	NA	NA	NA	NA	NA	NA
LMP	LMP_to_MALP	Ets1	FALSE	0.000322684	0.0138128	12.9339	0.905071	NA	NA	NA	NA	NA	NA	NA	NA	NA
LMP	LMP_to_MALP	Eya2	FALSE	8.34e-05	0.00436776	15.4789	1.11433	NA	NA	NA	NA	NA	NA	NA	NA	NA
LMP	LMP_to_MALP	Eya4	FALSE	1.96e-05	0.00121429	18.2244	1.01988	NA	NA	NA	NA	NA	NA	NA	NA	NA
LMP	LMP_to_MALP	Fabp4	FALSE	1.85e-07	1.79e-05	27.1888	1.19293	NA	NA	NA	NA	NA	NA	NA	NA	NA
LMP	LMP_to_MALP	Fabp5	FALSE	6.45e-05	0.00350467	15.9647	0.798725	NA	NA	NA	NA	NA	NA	NA	NA	NA
LMP	LMP_to_MALP	Fam102a	FALSE	0.000566803	0.0222152	11.882	-1.06268	NA	NA	NA	NA	NA	NA	NA	NA	NA
LMP	LMP_to_MALP	Fam102b	FALSE	0.000693895	0.026118	11.5055	0.941158	NA	NA	NA	NA	NA	NA	NA	NA	NA
LMP	LMP_to_MALP	Fam117b	FALSE	2.69e-07	2.54e-05	26.4571	1.06573	NA	NA	NA	NA	NA	NA	NA	NA	NA
LMP	LMP_to_MALP	Fam13a	FALSE	0.000538258	0.021249	11.9782	1.30336	NA	NA	NA	NA	NA	NA	NA	NA	NA
LMP	LMP_to_MALP	Fam168a	FALSE	9.27e-06	0.000630518	19.656	0.852428	NA	NA	NA	NA	NA	NA	NA	NA	NA
LMP	LMP_to_MALP	Fam20a	FALSE	9.84e-05	0.00504312	15.167	0.911611	NA	NA	NA	NA	NA	NA	NA	NA	NA
LMP	LMP_to_MALP	Fat1	FALSE	1.02e-06	8.45e-05	23.8942	0.630068	NA	NA	NA	NA	NA	NA	NA	NA	NA
LMP	LMP_to_MALP	Fat4	FALSE	1.1e-05	0.000729442	19.3364	1.27465	NA	NA	NA	NA	NA	NA	NA	NA	NA
LMP	LMP_to_MALP	Fblim1	FALSE	1.59e-06	0.000128273	23.0331	1.06002	NA	NA	NA	NA	NA	NA	NA	NA	NA
LMP	LMP_to_MALP	Fbln2	FALSE	1.68e-06	0.000133055	22.9346	1.03969	NA	NA	NA	NA	NA	NA	NA	NA	NA
LMP	LMP_to_MALP	Fbln5	FALSE	0	0	132.548	1.45032	NA	NA	NA	NA	NA	NA	NA	NA	NA
LMP	LMP_to_MALP	Fbn1	FALSE	0	0	83.1148	1.55736	NA	NA	NA	NA	NA	NA	NA	NA	NA
LMP	LMP_to_MALP	Fermt2	FALSE	1.98e-14	4.4e-12	58.5586	0.914811	NA	NA	NA	NA	NA	NA	NA	NA	NA
LMP	LMP_to_MALP	Fgfr2	FALSE	1.89e-15	4.85e-13	63.1383	0.929668	NA	NA	NA	NA	NA	NA	NA	NA	NA
LMP	LMP_to_MALP	Fhl1	FALSE	0	0	110.383	1.91693	NA	NA	NA	NA	NA	NA	NA	NA	NA
LMP	LMP_to_MALP	Fhl2	FALSE	1.14e-14	2.63e-12	59.6342	1.06235	NA	NA	NA	NA	NA	NA	NA	NA	NA
LMP	LMP_to_MALP	Flna	FALSE	5.44e-15	1.31e-12	61.1037	0.897703	NA	NA	NA	NA	NA	NA	NA	NA	NA
LMP	LMP_to_MALP	Fmo2	FALSE	0.000122636	0.00614051	14.7517	1.43776	NA	NA	NA	NA	NA	NA	NA	NA	NA
LMP	LMP_to_MALP	Fn1	FALSE	8.6e-13	1.55e-10	51.1406	0.832303	NA	NA	NA	NA	NA	NA	NA	NA	NA
LMP	LMP_to_MALP	Fndc1	FALSE	8.81e-08	8.87e-06	28.6187	1.71893	NA	NA	NA	NA	NA	NA	NA	NA	NA
LMP	LMP_to_MALP	Foxc1	FALSE	0.000153901	0.00738419	14.3239	0.708198	NA	NA	NA	NA	NA	NA	NA	NA	NA
LMP	LMP_to_MALP	Foxp1	FALSE	1.03e-05	0.000694856	19.4467	0.765808	NA	NA	NA	NA	NA	NA	NA	NA	NA
LMP	LMP_to_MALP	Frmd6	FALSE	0.000816026	0.0300416	11.2044	0.689426	NA	NA	NA	NA	NA	NA	NA	NA	NA
LMP	LMP_to_MALP	Fst	FALSE	0	0	88.6706	1.19071	NA	NA	NA	NA	NA	NA	NA	NA	NA
LMP	LMP_to_MALP	Fstl1	FALSE	0	0	167.934	1.23744	NA	NA	NA	NA	NA	NA	NA	NA	NA
LMP	LMP_to_MALP	Fzd5	FALSE	4.29e-05	0.00244564	16.7383	0.728954	NA	NA	NA	NA	NA	NA	NA	NA	NA
LMP	LMP_to_MALP	Fzd8	FALSE	0.000134853	0.00661565	14.5727	0.920086	NA	NA	NA	NA	NA	NA	NA	NA	NA
LMP	LMP_to_MALP	Gas6	FALSE	0	0	84.8031	1.1267	NA	NA	NA	NA	NA	NA	NA	NA	NA
LMP	LMP_to_MALP	Gchfr	FALSE	9.18e-07	7.77e-05	24.092	-1.61402	NA	NA	NA	NA	NA	NA	NA	NA	NA
LMP	LMP_to_MALP	Gcnt2	FALSE	0.000271452	0.0119501	13.2578	0.853134	NA	NA	NA	NA	NA	NA	NA	NA	NA
LMP	LMP_to_MALP	Gja1	FALSE	2.45e-07	2.31e-05	26.6443	0.729315	NA	NA	NA	NA	NA	NA	NA	NA	NA
LMP	LMP_to_MALP	Gjc1	FALSE	4.08e-05	0.00235078	16.8333	1.15207	NA	NA	NA	NA	NA	NA	NA	NA	NA
LMP	LMP_to_MALP	Glb1l2	FALSE	0.000957734	0.0343322	10.9075	0.812849	NA	NA	NA	NA	NA	NA	NA	NA	NA
LMP	LMP_to_MALP	Glrx	FALSE	0.000142664	0.00695202	14.4666	0.778091	NA	NA	NA	NA	NA	NA	NA	NA	NA
LMP	LMP_to_MALP	Glul	FALSE	0.00100643	0.0357258	10.8157	0.78651	NA	NA	NA	NA	NA	NA	NA	NA	NA
LMP	LMP_to_MALP	Gm13411	FALSE	0.000354251	0.0149877	12.7593	2.59503	NA	NA	NA	NA	NA	NA	NA	NA	NA
LMP	LMP_to_MALP	Gm266	FALSE	1.63e-05	0.00103176	18.58	-1.32615	NA	NA	NA	NA	NA	NA	NA	NA	NA
LMP	LMP_to_MALP	Gm26917	FALSE	1.31e-05	0.000855776	18.9912	-0.826912	NA	NA	NA	NA	NA	NA	NA	NA	NA
LMP	LMP_to_MALP	Gm45607	FALSE	0.0002158	0.00981485	13.6883	1.17888	NA	NA	NA	NA	NA	NA	NA	NA	NA
LMP	LMP_to_MALP	Gm48832	FALSE	0.000188983	0.00876546	13.9376	1.15206	NA	NA	NA	NA	NA	NA	NA	NA	NA
LMP	LMP_to_MALP	Gpat3	FALSE	0	0	79.5825	0.757782	NA	NA	NA	NA	NA	NA	NA	NA	NA
LMP	LMP_to_MALP	Gpm6b	FALSE	5.44e-05	0.00300894	16.2868	1.07691	NA	NA	NA	NA	NA	NA	NA	NA	NA
LMP	LMP_to_MALP	Gpr176	FALSE	5.38e-05	0.00299653	16.3091	1.04011	NA	NA	NA	NA	NA	NA	NA	NA	NA
LMP	LMP_to_MALP	Gprin3	FALSE	3.55e-11	5.24e-09	43.8461	2.01657	NA	NA	NA	NA	NA	NA	NA	NA	NA
LMP	LMP_to_MALP	Gpx3	FALSE	1.05e-14	2.48e-12	59.7961	0.976175	NA	NA	NA	NA	NA	NA	NA	NA	NA
LMP	LMP_to_MALP	Grb10	FALSE	9.45e-06	0.000640465	19.6202	0.664987	NA	NA	NA	NA	NA	NA	NA	NA	NA
LMP	LMP_to_MALP	Grrp1	FALSE	4.41e-05	0.00249386	16.6868	-2.13845	NA	NA	NA	NA	NA	NA	NA	NA	NA
LMP	LMP_to_MALP	Gys1	FALSE	3.07e-05	0.00182005	17.3752	0.858349	NA	NA	NA	NA	NA	NA	NA	NA	NA
LMP	LMP_to_MALP	Gzme	FALSE	4.06e-05	0.00234289	16.8447	1.40627	NA	NA	NA	NA	NA	NA	NA	NA	NA
LMP	LMP_to_MALP	H19	FALSE	0.000597015	0.023068	11.7853	1.24287	NA	NA	NA	NA	NA	NA	NA	NA	NA
LMP	LMP_to_MALP	H2-K1	FALSE	2.49e-05	0.00150266	17.7737	0.580596	NA	NA	NA	NA	NA	NA	NA	NA	NA
LMP	LMP_to_MALP	Hacd4	FALSE	3.24e-05	0.00191409	17.2692	1.27088	NA	NA	NA	NA	NA	NA	NA	NA	NA
LMP	LMP_to_MALP	Hebp1	FALSE	0.000623916	0.023896	11.7032	0.667626	NA	NA	NA	NA	NA	NA	NA	NA	NA
LMP	LMP_to_MALP	Hectd2	FALSE	2.87e-06	0.000216287	21.8995	1.58012	NA	NA	NA	NA	NA	NA	NA	NA	NA
LMP	LMP_to_MALP	Heph	FALSE	0.000712108	0.0267114	11.4574	1.27746	NA	NA	NA	NA	NA	NA	NA	NA	NA
LMP	LMP_to_MALP	Hif1a	FALSE	1.6e-06	0.000128788	23.0184	0.741258	NA	NA	NA	NA	NA	NA	NA	NA	NA
LMP	LMP_to_MALP	Hmga2	FALSE	2.24e-06	0.000172759	22.3778	-1.25595	NA	NA	NA	NA	NA	NA	NA	NA	NA
LMP	LMP_to_MALP	Hnmt	FALSE	0.000352447	0.0149403	12.7688	1.2432	NA	NA	NA	NA	NA	NA	NA	NA	NA
LMP	LMP_to_MALP	Hsp90b1	FALSE	0.000537331	0.021249	11.9814	0.570237	NA	NA	NA	NA	NA	NA	NA	NA	NA
LMP	LMP_to_MALP	Hspa1b	FALSE	4.88e-06	0.000347014	20.8839	1.26172	NA	NA	NA	NA	NA	NA	NA	NA	NA
LMP	LMP_to_MALP	Hspb1	FALSE	6.18e-08	6.37e-06	29.3049	1.07551	NA	NA	NA	NA	NA	NA	NA	NA	NA
LMP	LMP_to_MALP	Hspb6	FALSE	1.64e-06	0.000130503	22.9788	1.23573	NA	NA	NA	NA	NA	NA	NA	NA	NA
LMP	LMP_to_MALP	Htra1	FALSE	0.000548116	0.0215991	11.9444	0.742379	NA	NA	NA	NA	NA	NA	NA	NA	NA
LMP	LMP_to_MALP	Id4	FALSE	0	0	85.7382	1.68538	NA	NA	NA	NA	NA	NA	NA	NA	NA
LMP	LMP_to_MALP	Ifitm3	FALSE	0.00142362	0.0479614	10.1749	0.547428	NA	NA	NA	NA	NA	NA	NA	NA	NA
LMP	LMP_to_MALP	Ifitm5	FALSE	0	0	287.102	-2.44333	NA	NA	NA	NA	NA	NA	NA	NA	NA
LMP	LMP_to_MALP	Igf1r	FALSE	6.58e-07	5.8e-05	24.7334	0.773827	NA	NA	NA	NA	NA	NA	NA	NA	NA
LMP	LMP_to_MALP	Igfbp2	FALSE	0.000139285	0.00681778	14.5118	2.21276	NA	NA	NA	NA	NA	NA	NA	NA	NA
LMP	LMP_to_MALP	Igfbp4	FALSE	0	0	127.841	1.24515	NA	NA	NA	NA	NA	NA	NA	NA	NA
LMP	LMP_to_MALP	Igfbp5	FALSE	4.44e-12	7.24e-10	47.9179	1.95178	NA	NA	NA	NA	NA	NA	NA	NA	NA
LMP	LMP_to_MALP	Igfbp7	FALSE	0	0	70.4265	0.976148	NA	NA	NA	NA	NA	NA	NA	NA	NA
LMP	LMP_to_MALP	Ihh	FALSE	0.000231675	0.0104068	13.555	-2.10676	NA	NA	NA	NA	NA	NA	NA	NA	NA
LMP	LMP_to_MALP	Il1rn	FALSE	5.21e-09	6.05e-07	34.1101	1.19706	NA	NA	NA	NA	NA	NA	NA	NA	NA
LMP	LMP_to_MALP	Il34	FALSE	1.67e-05	0.00105634	18.5281	1.64113	NA	NA	NA	NA	NA	NA	NA	NA	NA
LMP	LMP_to_MALP	Impad1	FALSE	0.000905584	0.0327314	11.0113	0.611055	NA	NA	NA	NA	NA	NA	NA	NA	NA
LMP	LMP_to_MALP	Islr	FALSE	3.33e-16	8.98e-14	66.4723	1.33294	NA	NA	NA	NA	NA	NA	NA	NA	NA
LMP	LMP_to_MALP	Ism1	FALSE	0.000377952	0.0157463	12.6382	1.64519	NA	NA	NA	NA	NA	NA	NA	NA	NA
LMP	LMP_to_MALP	Itga1	FALSE	3.75e-13	7.06e-11	52.7702	1.51671	NA	NA	NA	NA	NA	NA	NA	NA	NA
LMP	LMP_to_MALP	Itga11	FALSE	5.54e-10	7.33e-08	38.477	1.11704	NA	NA	NA	NA	NA	NA	NA	NA	NA
LMP	LMP_to_MALP	Itga5	FALSE	7.95e-05	0.00421795	15.5692	0.931728	NA	NA	NA	NA	NA	NA	NA	NA	NA
LMP	LMP_to_MALP	Itga9	FALSE	1.01e-07	1e-05	28.3544	1.36519	NA	NA	NA	NA	NA	NA	NA	NA	NA
LMP	LMP_to_MALP	Itgav	FALSE	1.35e-05	0.00087408	18.9396	0.740315	NA	NA	NA	NA	NA	NA	NA	NA	NA
LMP	LMP_to_MALP	Itgb1	FALSE	9.03e-10	1.14e-07	37.5233	0.678584	NA	NA	NA	NA	NA	NA	NA	NA	NA
LMP	LMP_to_MALP	Itgbl1	FALSE	2.72e-07	2.55e-05	26.441	1.30737	NA	NA	NA	NA	NA	NA	NA	NA	NA
LMP	LMP_to_MALP	Itm2a	FALSE	0	0	70.9152	1.31373	NA	NA	NA	NA	NA	NA	NA	NA	NA
LMP	LMP_to_MALP	Itpr1	FALSE	1.21e-07	1.18e-05	28.0114	1.10363	NA	NA	NA	NA	NA	NA	NA	NA	NA
LMP	LMP_to_MALP	Jak1	FALSE	0.000678516	0.0257165	11.5472	0.616691	NA	NA	NA	NA	NA	NA	NA	NA	NA
LMP	LMP_to_MALP	Jam2	FALSE	0.000112336	0.00567687	14.9172	-1.16868	NA	NA	NA	NA	NA	NA	NA	NA	NA
LMP	LMP_to_MALP	Jph2	FALSE	1.23e-05	0.000808218	19.1175	1.40014	NA	NA	NA	NA	NA	NA	NA	NA	NA
LMP	LMP_to_MALP	Kank2	FALSE	0.000576137	0.0225003	11.8515	0.704373	NA	NA	NA	NA	NA	NA	NA	NA	NA
LMP	LMP_to_MALP	Kazn	FALSE	0.000517394	0.0206494	12.0519	1.59821	NA	NA	NA	NA	NA	NA	NA	NA	NA
LMP	LMP_to_MALP	Kcne4	FALSE	2.98e-05	0.00177125	17.432	1.26621	NA	NA	NA	NA	NA	NA	NA	NA	NA
LMP	LMP_to_MALP	Kcnf1	FALSE	0.000495671	0.0199649	12.1319	-1.39997	NA	NA	NA	NA	NA	NA	NA	NA	NA
LMP	LMP_to_MALP	Kcnk1	FALSE	2.29e-13	4.42e-11	53.7427	-1.96434	NA	NA	NA	NA	NA	NA	NA	NA	NA
LMP	LMP_to_MALP	Kcnn4	FALSE	3.08e-10	4.18e-08	39.6229	-1.82875	NA	NA	NA	NA	NA	NA	NA	NA	NA
LMP	LMP_to_MALP	Kcns3	FALSE	7.31e-08	7.49e-06	28.9812	0.837763	NA	NA	NA	NA	NA	NA	NA	NA	NA
LMP	LMP_to_MALP	Kctd12	FALSE	1.3e-12	2.31e-10	50.3304	1.26935	NA	NA	NA	NA	NA	NA	NA	NA	NA
LMP	LMP_to_MALP	Kitl	FALSE	4.1e-07	3.78e-05	25.6447	0.898257	NA	NA	NA	NA	NA	NA	NA	NA	NA
LMP	LMP_to_MALP	Klf2	FALSE	1.68e-05	0.0010585	18.5187	0.8838	NA	NA	NA	NA	NA	NA	NA	NA	NA
LMP	LMP_to_MALP	Klf7	FALSE	2.64e-05	0.00158433	17.6597	0.770743	NA	NA	NA	NA	NA	NA	NA	NA	NA
LMP	LMP_to_MALP	Klhdc7a	FALSE	1.18e-05	0.000784708	19.1912	0.962273	NA	NA	NA	NA	NA	NA	NA	NA	NA
LMP	LMP_to_MALP	Kremen1	FALSE	0.000251206	0.011192	13.4031	0.761038	NA	NA	NA	NA	NA	NA	NA	NA	NA
LMP	LMP_to_MALP	Lama4	FALSE	1.23e-06	9.99e-05	23.5347	1.01423	NA	NA	NA	NA	NA	NA	NA	NA	NA
LMP	LMP_to_MALP	Lamb2	FALSE	5.77e-05	0.00317979	16.1774	0.72308	NA	NA	NA	NA	NA	NA	NA	NA	NA
LMP	LMP_to_MALP	Lamp2	FALSE	3.76e-08	3.99e-06	30.2674	0.635367	NA	NA	NA	NA	NA	NA	NA	NA	NA
LMP	LMP_to_MALP	Large1	FALSE	0.000373996	0.0156412	12.6578	0.866195	NA	NA	NA	NA	NA	NA	NA	NA	NA
LMP	LMP_to_MALP	Lats2	FALSE	2.39e-05	0.00145704	17.8507	0.76075	NA	NA	NA	NA	NA	NA	NA	NA	NA
LMP	LMP_to_MALP	Lfng	FALSE	0.000510333	0.0204799	12.0775	1.05477	NA	NA	NA	NA	NA	NA	NA	NA	NA
LMP	LMP_to_MALP	Lgals3bp	FALSE	5.35e-06	0.00037733	20.7083	0.841505	NA	NA	NA	NA	NA	NA	NA	NA	NA
LMP	LMP_to_MALP	Lgalsl	FALSE	0.00102217	0.0361668	10.787	0.667136	NA	NA	NA	NA	NA	NA	NA	NA	NA
LMP	LMP_to_MALP	Lgi2	FALSE	0.00143002	0.048103	10.1667	1.71261	NA	NA	NA	NA	NA	NA	NA	NA	NA
LMP	LMP_to_MALP	Lgr6	FALSE	0.000389263	0.0161867	12.583	-1.50761	NA	NA	NA	NA	NA	NA	NA	NA	NA
LMP	LMP_to_MALP	Lhfp	FALSE	0.00101236	0.0358779	10.8048	0.561021	NA	NA	NA	NA	NA	NA	NA	NA	NA
LMP	LMP_to_MALP	Lima1	FALSE	7.29e-14	1.47e-11	55.9876	0.99771	NA	NA	NA	NA	NA	NA	NA	NA	NA
LMP	LMP_to_MALP	Limch1	FALSE	6.56e-05	0.00355622	15.9323	1.1175	NA	NA	NA	NA	NA	NA	NA	NA	NA
LMP	LMP_to_MALP	Lims1	FALSE	7.78e-07	6.68e-05	24.4128	0.731744	NA	NA	NA	NA	NA	NA	NA	NA	NA
LMP	LMP_to_MALP	Lims2	FALSE	5.53e-07	4.97e-05	25.0694	2.1056	NA	NA	NA	NA	NA	NA	NA	NA	NA
LMP	LMP_to_MALP	Lmcd1	FALSE	2.29e-08	2.51e-06	31.2314	1.15259	NA	NA	NA	NA	NA	NA	NA	NA	NA
LMP	LMP_to_MALP	Lmo7	FALSE	2.81e-05	0.00167576	17.5426	0.838341	NA	NA	NA	NA	NA	NA	NA	NA	NA
LMP	LMP_to_MALP	Lmod1	FALSE	3.33e-16	8.98e-14	66.5468	3.29342	NA	NA	NA	NA	NA	NA	NA	NA	NA
LMP	LMP_to_MALP	Lnpep	FALSE	0.000827366	0.0303567	11.1788	0.640188	NA	NA	NA	NA	NA	NA	NA	NA	NA
LMP	LMP_to_MALP	Lox	FALSE	0	0	82.2216	0.857763	NA	NA	NA	NA	NA	NA	NA	NA	NA
LMP	LMP_to_MALP	Loxl1	FALSE	0	0	75.0667	1.2781	NA	NA	NA	NA	NA	NA	NA	NA	NA
LMP	LMP_to_MALP	Loxl2	FALSE	5.44e-15	1.31e-12	61.089	1.06742	NA	NA	NA	NA	NA	NA	NA	NA	NA
LMP	LMP_to_MALP	Loxl3	FALSE	1.73e-05	0.00107932	18.4652	0.786635	NA	NA	NA	NA	NA	NA	NA	NA	NA
LMP	LMP_to_MALP	Lpar4	FALSE	0.000133797	0.00658915	14.5875	1.60783	NA	NA	NA	NA	NA	NA	NA	NA	NA
LMP	LMP_to_MALP	Lpp	FALSE	0	0	115.776	1.0946	NA	NA	NA	NA	NA	NA	NA	NA	NA
LMP	LMP_to_MALP	Ltbp1	FALSE	2.39e-07	2.28e-05	26.6908	0.757122	NA	NA	NA	NA	NA	NA	NA	NA	NA
LMP	LMP_to_MALP	Ltbp2	FALSE	1.29e-08	1.46e-06	32.341	1.43558	NA	NA	NA	NA	NA	NA	NA	NA	NA
LMP	LMP_to_MALP	Lurap1l	FALSE	7.97e-06	0.000552625	19.9441	1.00201	NA	NA	NA	NA	NA	NA	NA	NA	NA
LMP	LMP_to_MALP	Ly6a	FALSE	8.2e-06	0.000564931	19.8899	1.45242	NA	NA	NA	NA	NA	NA	NA	NA	NA
LMP	LMP_to_MALP	Ly75	FALSE	7.7e-07	6.65e-05	24.4311	1.48889	NA	NA	NA	NA	NA	NA	NA	NA	NA
LMP	LMP_to_MALP	M6pr	FALSE	0.00118682	0.0409313	10.5107	0.677483	NA	NA	NA	NA	NA	NA	NA	NA	NA
LMP	LMP_to_MALP	Maf	FALSE	6.64e-05	0.00357906	15.9108	0.702687	NA	NA	NA	NA	NA	NA	NA	NA	NA
LMP	LMP_to_MALP	Mamdc2	FALSE	0.000148403	0.00715183	14.3924	-2.087	NA	NA	NA	NA	NA	NA	NA	NA	NA
LMP	LMP_to_MALP	Man2a1	FALSE	4.75e-05	0.00265725	16.5465	0.849473	NA	NA	NA	NA	NA	NA	NA	NA	NA
LMP	LMP_to_MALP	Map4k5	FALSE	0.000459778	0.0187265	12.2721	0.800485	NA	NA	NA	NA	NA	NA	NA	NA	NA
LMP	LMP_to_MALP	2023-03-01	FALSE	1.85e-08	2.06e-06	31.6495	1.21854	NA	NA	NA	NA	NA	NA	NA	NA	NA
LMP	LMP_to_MALP	Marcks	FALSE	0	0	86.1425	0.89516	NA	NA	NA	NA	NA	NA	NA	NA	NA
LMP	LMP_to_MALP	Mark1	FALSE	5.02e-09	5.9e-07	34.1806	1.41174	NA	NA	NA	NA	NA	NA	NA	NA	NA
LMP	LMP_to_MALP	Mbnl2	FALSE	0.00051362	0.020574	12.0656	0.570378	NA	NA	NA	NA	NA	NA	NA	NA	NA
LMP	LMP_to_MALP	Mdk	FALSE	0.000367924	0.0154532	12.6884	1.14822	NA	NA	NA	NA	NA	NA	NA	NA	NA
LMP	LMP_to_MALP	Med13l	FALSE	0.000201099	0.00924253	13.8208	0.64926	NA	NA	NA	NA	NA	NA	NA	NA	NA
LMP	LMP_to_MALP	Medag	FALSE	0.000591339	0.0230116	11.803	1.30587	NA	NA	NA	NA	NA	NA	NA	NA	NA
LMP	LMP_to_MALP	Mepe	FALSE	0.000231451	0.0104068	13.5568	-1.24121	NA	NA	NA	NA	NA	NA	NA	NA	NA
LMP	LMP_to_MALP	Mest	FALSE	1.2e-05	0.000792015	19.1619	1.87853	NA	NA	NA	NA	NA	NA	NA	NA	NA
LMP	LMP_to_MALP	Mfap2	FALSE	4.13e-06	0.000302884	21.2015	1.02102	NA	NA	NA	NA	NA	NA	NA	NA	NA
LMP	LMP_to_MALP	Mfap5	FALSE	0	0	73.9788	2.87081	NA	NA	NA	NA	NA	NA	NA	NA	NA
LMP	LMP_to_MALP	Mgp	FALSE	1.79e-11	2.69e-09	45.1929	1.34424	NA	NA	NA	NA	NA	NA	NA	NA	NA
LMP	LMP_to_MALP	Mgst1	FALSE	0.000173848	0.00819715	14.0945	0.801821	NA	NA	NA	NA	NA	NA	NA	NA	NA
LMP	LMP_to_MALP	Mlip	FALSE	0.000843083	0.0307782	11.1439	-1.92755	NA	NA	NA	NA	NA	NA	NA	NA	NA
LMP	LMP_to_MALP	Mmp14	FALSE	2.29e-10	3.18e-08	40.204	0.840752	NA	NA	NA	NA	NA	NA	NA	NA	NA
LMP	LMP_to_MALP	Mmp17	FALSE	0.00085356	0.0311086	11.121	1.52667	NA	NA	NA	NA	NA	NA	NA	NA	NA
LMP	LMP_to_MALP	Mmp19	FALSE	4.46e-05	0.00251694	16.6641	1.75543	NA	NA	NA	NA	NA	NA	NA	NA	NA
LMP	LMP_to_MALP	Mrps6	FALSE	9.72e-08	9.69e-06	28.4282	0.839018	NA	NA	NA	NA	NA	NA	NA	NA	NA
LMP	LMP_to_MALP	Ms4a4d	FALSE	3.59e-13	6.81e-11	52.8571	2.12148	NA	NA	NA	NA	NA	NA	NA	NA	NA
LMP	LMP_to_MALP	Msrb1	FALSE	4.86e-06	0.000346682	20.8919	0.690438	NA	NA	NA	NA	NA	NA	NA	NA	NA
LMP	LMP_to_MALP	Msrb3	FALSE	6.99e-15	1.66e-12	60.6144	1.01678	NA	NA	NA	NA	NA	NA	NA	NA	NA
LMP	LMP_to_MALP	mt-Atp6	FALSE	8.6e-05	0.00447939	15.4222	0.517995	NA	NA	NA	NA	NA	NA	NA	NA	NA
LMP	LMP_to_MALP	mt-Co1	FALSE	0.000595167	0.0230674	11.791	0.513682	NA	NA	NA	NA	NA	NA	NA	NA	NA
LMP	LMP_to_MALP	mt-Co2	FALSE	8.15e-05	0.00427613	15.5236	0.5322	NA	NA	NA	NA	NA	NA	NA	NA	NA
LMP	LMP_to_MALP	mt-Co3	FALSE	1.85e-07	1.79e-05	27.1856	0.574533	NA	NA	NA	NA	NA	NA	NA	NA	NA
LMP	LMP_to_MALP	mt-Nd2	FALSE	0.000696764	0.0261808	11.4979	0.538925	NA	NA	NA	NA	NA	NA	NA	NA	NA
LMP	LMP_to_MALP	mt-Nd4	FALSE	4.16e-05	0.00238763	16.7988	0.536933	NA	NA	NA	NA	NA	NA	NA	NA	NA
LMP	LMP_to_MALP	Mtss1l	FALSE	3.84e-07	3.56e-05	25.7751	0.924139	NA	NA	NA	NA	NA	NA	NA	NA	NA
LMP	LMP_to_MALP	Mustn1	FALSE	0.00115049	0.0399243	10.5682	0.88768	NA	NA	NA	NA	NA	NA	NA	NA	NA
LMP	LMP_to_MALP	Myadm	FALSE	0	0	74.6709	1.07691	NA	NA	NA	NA	NA	NA	NA	NA	NA
LMP	LMP_to_MALP	Mycbp2	FALSE	4.26e-05	0.00243911	16.7533	0.699437	NA	NA	NA	NA	NA	NA	NA	NA	NA
LMP	LMP_to_MALP	Myh9	FALSE	9.08e-10	1.14e-07	37.5123	0.821778	NA	NA	NA	NA	NA	NA	NA	NA	NA
LMP	LMP_to_MALP	Myl12a	FALSE	5.34e-06	0.00037733	20.7118	0.557857	NA	NA	NA	NA	NA	NA	NA	NA	NA
LMP	LMP_to_MALP	Myl6	FALSE	8.88e-16	2.36e-13	64.5677	0.684116	NA	NA	NA	NA	NA	NA	NA	NA	NA
LMP	LMP_to_MALP	Myl9	FALSE	0	0	126.935	1.51906	NA	NA	NA	NA	NA	NA	NA	NA	NA
LMP	LMP_to_MALP	Mylk	FALSE	0	0	189.697	1.75231	NA	NA	NA	NA	NA	NA	NA	NA	NA
LMP	LMP_to_MALP	Myom1	FALSE	0.00120971	0.0415824	10.4755	1.00451	NA	NA	NA	NA	NA	NA	NA	NA	NA
LMP	LMP_to_MALP	Nacc2	FALSE	0.000769865	0.0285914	11.3125	0.888078	NA	NA	NA	NA	NA	NA	NA	NA	NA
LMP	LMP_to_MALP	Nampt	FALSE	3.64e-05	0.00213046	17.0504	0.754451	NA	NA	NA	NA	NA	NA	NA	NA	NA
LMP	LMP_to_MALP	Nbeal1	FALSE	0.000515488	0.020611	12.0588	0.662168	NA	NA	NA	NA	NA	NA	NA	NA	NA
LMP	LMP_to_MALP	Ndn	FALSE	8e-05	0.00421795	15.5586	0.982393	NA	NA	NA	NA	NA	NA	NA	NA	NA
LMP	LMP_to_MALP	Ndnf	FALSE	3.79e-14	7.8e-12	57.2745	1.30225	NA	NA	NA	NA	NA	NA	NA	NA	NA
LMP	LMP_to_MALP	Nedd4	FALSE	1.42e-12	2.48e-10	50.1603	0.660288	NA	NA	NA	NA	NA	NA	NA	NA	NA
LMP	LMP_to_MALP	Nedd9	FALSE	0.00011807	0.00593913	14.8233	0.690563	NA	NA	NA	NA	NA	NA	NA	NA	NA
LMP	LMP_to_MALP	Neo1	FALSE	6.64e-05	0.00357906	15.9117	0.783001	NA	NA	NA	NA	NA	NA	NA	NA	NA
LMP	LMP_to_MALP	Net1	FALSE	0.000144226	0.00699689	14.4461	0.871096	NA	NA	NA	NA	NA	NA	NA	NA	NA
LMP	LMP_to_MALP	Nexn	FALSE	8.11e-13	1.47e-10	51.256	1.16248	NA	NA	NA	NA	NA	NA	NA	NA	NA
LMP	LMP_to_MALP	Nfib	FALSE	6.06e-06	0.000425283	20.4696	0.722926	NA	NA	NA	NA	NA	NA	NA	NA	NA
LMP	LMP_to_MALP	Nid1	FALSE	1.22e-15	3.21e-13	63.9569	2.26258	NA	NA	NA	NA	NA	NA	NA	NA	NA
LMP	LMP_to_MALP	Nkd2	FALSE	1.42e-10	2.01e-08	41.1363	1.54282	NA	NA	NA	NA	NA	NA	NA	NA	NA
LMP	LMP_to_MALP	Notch1	FALSE	0.000278181	0.012146	13.2119	0.945082	NA	NA	NA	NA	NA	NA	NA	NA	NA
LMP	LMP_to_MALP	Notch3	FALSE	0.000143772	0.00699039	14.4521	1.15052	NA	NA	NA	NA	NA	NA	NA	NA	NA
LMP	LMP_to_MALP	Npnt	FALSE	7.6e-13	1.39e-10	51.3818	1.38363	NA	NA	NA	NA	NA	NA	NA	NA	NA
LMP	LMP_to_MALP	Npr3	FALSE	1.63e-05	0.00103176	18.5785	1.79875	NA	NA	NA	NA	NA	NA	NA	NA	NA
LMP	LMP_to_MALP	Nr1d1	FALSE	0.000274168	0.012043	13.2391	0.901759	NA	NA	NA	NA	NA	NA	NA	NA	NA
LMP	LMP_to_MALP	Nrep	FALSE	0.000868315	0.0315411	11.0892	1.42384	NA	NA	NA	NA	NA	NA	NA	NA	NA
LMP	LMP_to_MALP	Nrg4	FALSE	2.3e-05	0.00141117	17.9222	1.06187	NA	NA	NA	NA	NA	NA	NA	NA	NA
LMP	LMP_to_MALP	Nrip1	FALSE	0.000225665	0.0102209	13.6043	0.793344	NA	NA	NA	NA	NA	NA	NA	NA	NA
LMP	LMP_to_MALP	Nrp1	FALSE	2.91e-10	3.97e-08	39.7325	1.05061	NA	NA	NA	NA	NA	NA	NA	NA	NA
LMP	LMP_to_MALP	Ogn	FALSE	0	0	134.476	1.4136	NA	NA	NA	NA	NA	NA	NA	NA	NA
LMP	LMP_to_MALP	Olfm1	FALSE	0.000147859	0.00715183	14.3993	1.04436	NA	NA	NA	NA	NA	NA	NA	NA	NA
LMP	LMP_to_MALP	Olfml2b	FALSE	1.53e-11	2.36e-09	45.4896	1.0853	NA	NA	NA	NA	NA	NA	NA	NA	NA
LMP	LMP_to_MALP	Olfml3	FALSE	2.49e-05	0.00150266	17.7709	0.64734	NA	NA	NA	NA	NA	NA	NA	NA	NA
LMP	LMP_to_MALP	Omd	FALSE	0	0	75.8831	1.43561	NA	NA	NA	NA	NA	NA	NA	NA	NA
LMP	LMP_to_MALP	Orm1	FALSE	2.09e-14	4.6e-12	58.4438	1.29547	NA	NA	NA	NA	NA	NA	NA	NA	NA
LMP	LMP_to_MALP	Orm2	FALSE	0	0	203.252	1.31514	NA	NA	NA	NA	NA	NA	NA	NA	NA
LMP	LMP_to_MALP	Orm3	FALSE	3.8e-08	4.01e-06	30.2473	1.3151	NA	NA	NA	NA	NA	NA	NA	NA	NA
LMP	LMP_to_MALP	Ostf1	FALSE	0.000201892	0.00925948	13.8134	0.569324	NA	NA	NA	NA	NA	NA	NA	NA	NA
LMP	LMP_to_MALP	Otor	FALSE	0.000371197	0.0155539	12.6719	2.56562	NA	NA	NA	NA	NA	NA	NA	NA	NA
LMP	LMP_to_MALP	Oxct1	FALSE	3.94e-08	4.13e-06	30.1794	0.752891	NA	NA	NA	NA	NA	NA	NA	NA	NA
LMP	LMP_to_MALP	P4ha3	FALSE	8.57e-08	8.67e-06	28.6717	1.32852	NA	NA	NA	NA	NA	NA	NA	NA	NA
LMP	LMP_to_MALP	Palld	FALSE	0	0	199.87	1.46372	NA	NA	NA	NA	NA	NA	NA	NA	NA
LMP	LMP_to_MALP	Palm2	FALSE	0.00112678	0.039295	10.6067	1.49066	NA	NA	NA	NA	NA	NA	NA	NA	NA
LMP	LMP_to_MALP	Pappa	FALSE	0	0	70.5493	1.53134	NA	NA	NA	NA	NA	NA	NA	NA	NA
LMP	LMP_to_MALP	Pappa2	FALSE	1.62e-05	0.00103072	18.5915	1.4434	NA	NA	NA	NA	NA	NA	NA	NA	NA
LMP	LMP_to_MALP	Parva	FALSE	0.00121783	0.0417369	10.4631	0.577805	NA	NA	NA	NA	NA	NA	NA	NA	NA
LMP	LMP_to_MALP	Pawr	FALSE	5.46e-10	7.27e-08	38.5048	1.20156	NA	NA	NA	NA	NA	NA	NA	NA	NA
LMP	LMP_to_MALP	Pbxip1	FALSE	0.000671231	0.0254846	11.5673	0.715202	NA	NA	NA	NA	NA	NA	NA	NA	NA
LMP	LMP_to_MALP	Pcdh20	FALSE	0.000788772	0.0291859	11.2675	-2.21292	NA	NA	NA	NA	NA	NA	NA	NA	NA
LMP	LMP_to_MALP	Pcolce	FALSE	6.95e-07	6.07e-05	24.6284	0.650773	NA	NA	NA	NA	NA	NA	NA	NA	NA
LMP	LMP_to_MALP	Pcsk6	FALSE	1.89e-15	4.85e-13	63.1409	-1.58061	NA	NA	NA	NA	NA	NA	NA	NA	NA
LMP	LMP_to_MALP	Pde5a	FALSE	4.51e-06	0.000323874	21.0349	1.27524	NA	NA	NA	NA	NA	NA	NA	NA	NA
LMP	LMP_to_MALP	Pdgfrb	FALSE	3.52e-09	4.22e-07	34.8729	0.923861	NA	NA	NA	NA	NA	NA	NA	NA	NA
LMP	LMP_to_MALP	Pdk4	FALSE	7.78e-05	0.00414402	15.6104	0.81105	NA	NA	NA	NA	NA	NA	NA	NA	NA
LMP	LMP_to_MALP	Pdlim1	FALSE	7.54e-10	9.62e-08	37.8768	1.23057	NA	NA	NA	NA	NA	NA	NA	NA	NA
LMP	LMP_to_MALP	Pdlim2	FALSE	6.66e-10	8.66e-08	38.1165	0.93891	NA	NA	NA	NA	NA	NA	NA	NA	NA
LMP	LMP_to_MALP	Pdlim5	FALSE	0	0	154.776	1.40588	NA	NA	NA	NA	NA	NA	NA	NA	NA
LMP	LMP_to_MALP	Pdlim7	FALSE	0.00105013	0.0369169	10.737	0.607356	NA	NA	NA	NA	NA	NA	NA	NA	NA
LMP	LMP_to_MALP	Pdp1	FALSE	0.000612376	0.0235618	11.738	1.19398	NA	NA	NA	NA	NA	NA	NA	NA	NA
LMP	LMP_to_MALP	Pdzd2	FALSE	0.000262037	0.0116035	13.324	-2.1631	NA	NA	NA	NA	NA	NA	NA	NA	NA
LMP	LMP_to_MALP	Pdzrn3	FALSE	0.000593967	0.0230674	11.7948	1.12352	NA	NA	NA	NA	NA	NA	NA	NA	NA
LMP	LMP_to_MALP	Pdzrn4	FALSE	0.000441111	0.0180335	12.3495	3.06678	NA	NA	NA	NA	NA	NA	NA	NA	NA
LMP	LMP_to_MALP	Pfkp	FALSE	0.00034712	0.0148008	12.7973	0.826339	NA	NA	NA	NA	NA	NA	NA	NA	NA
LMP	LMP_to_MALP	Phactr2	FALSE	7.42e-06	0.000519123	20.082	1.16888	NA	NA	NA	NA	NA	NA	NA	NA	NA
LMP	LMP_to_MALP	Phex	FALSE	9.98e-07	8.32e-05	23.932	-1.34577	NA	NA	NA	NA	NA	NA	NA	NA	NA
LMP	LMP_to_MALP	Phldb2	FALSE	0	0	108.468	1.6358	NA	NA	NA	NA	NA	NA	NA	NA	NA
LMP	LMP_to_MALP	Picalm	FALSE	0.000128395	0.00637043	14.6652	0.613869	NA	NA	NA	NA	NA	NA	NA	NA	NA
LMP	LMP_to_MALP	Pik3r1	FALSE	3.35e-12	5.62e-10	48.4749	1.03714	NA	NA	NA	NA	NA	NA	NA	NA	NA
LMP	LMP_to_MALP	Pkd2	FALSE	2.7e-05	0.00161194	17.6216	0.806787	NA	NA	NA	NA	NA	NA	NA	NA	NA
LMP	LMP_to_MALP	Pla1a	FALSE	0.000987329	0.0351048	10.8512	1.8619	NA	NA	NA	NA	NA	NA	NA	NA	NA
LMP	LMP_to_MALP	Pla2g15	FALSE	0.000509177	0.0204712	12.0818	1.00599	NA	NA	NA	NA	NA	NA	NA	NA	NA
LMP	LMP_to_MALP	Pla2r1	FALSE	0.0013639	0.046235	10.254	1.36104	NA	NA	NA	NA	NA	NA	NA	NA	NA
LMP	LMP_to_MALP	Plagl1	FALSE	2.23e-05	0.00137153	17.9818	1.09887	NA	NA	NA	NA	NA	NA	NA	NA	NA
LMP	LMP_to_MALP	Plcb4	FALSE	9.7e-07	8.12e-05	23.9871	1.66971	NA	NA	NA	NA	NA	NA	NA	NA	NA
LMP	LMP_to_MALP	Plce1	FALSE	1.71e-05	0.00107378	18.4859	1.3947	NA	NA	NA	NA	NA	NA	NA	NA	NA
LMP	LMP_to_MALP	Plekhg2	FALSE	0.000331479	0.0141615	12.8836	0.944577	NA	NA	NA	NA	NA	NA	NA	NA	NA
LMP	LMP_to_MALP	Plekhg4	FALSE	0.000277918	0.012146	13.2136	1.34772	NA	NA	NA	NA	NA	NA	NA	NA	NA
LMP	LMP_to_MALP	Plpp1	FALSE	7.87e-08	8e-06	28.8367	1.02499	NA	NA	NA	NA	NA	NA	NA	NA	NA
LMP	LMP_to_MALP	Plscr2	FALSE	9.37e-05	0.00483836	15.2586	1.43684	NA	NA	NA	NA	NA	NA	NA	NA	NA
LMP	LMP_to_MALP	Plxdc2	FALSE	3.44e-15	8.64e-13	62.005	1.34976	NA	NA	NA	NA	NA	NA	NA	NA	NA
LMP	LMP_to_MALP	Plxna2	FALSE	4.56e-12	7.37e-10	47.8679	1.46067	NA	NA	NA	NA	NA	NA	NA	NA	NA
LMP	LMP_to_MALP	Pmepa1	FALSE	4.77e-06	0.000341304	20.9282	0.681141	NA	NA	NA	NA	NA	NA	NA	NA	NA
LMP	LMP_to_MALP	Pmp22	FALSE	0.000222016	0.0100766	13.6349	0.756858	NA	NA	NA	NA	NA	NA	NA	NA	NA
LMP	LMP_to_MALP	Podnl1	FALSE	4.61e-08	4.82e-06	29.8734	0.958448	NA	NA	NA	NA	NA	NA	NA	NA	NA
LMP	LMP_to_MALP	Polk	FALSE	2.94e-08	3.19e-06	30.7486	1.06004	NA	NA	NA	NA	NA	NA	NA	NA	NA
LMP	LMP_to_MALP	Porcn	FALSE	3.85e-10	5.19e-08	39.1869	1.20286	NA	NA	NA	NA	NA	NA	NA	NA	NA
LMP	LMP_to_MALP	Pou6f1	FALSE	8e-05	0.00421795	15.5593	1.26216	NA	NA	NA	NA	NA	NA	NA	NA	NA
LMP	LMP_to_MALP	Ppargc1a	FALSE	0	0	83.711	1.05682	NA	NA	NA	NA	NA	NA	NA	NA	NA
LMP	LMP_to_MALP	Ppfibp1	FALSE	9.57e-06	0.000647066	19.5947	0.661628	NA	NA	NA	NA	NA	NA	NA	NA	NA
LMP	LMP_to_MALP	Ppp1r12a	FALSE	5.46e-13	1.02e-10	52.0335	0.907323	NA	NA	NA	NA	NA	NA	NA	NA	NA
LMP	LMP_to_MALP	Ppp1r12b	FALSE	8.35e-06	0.000573539	19.855	1.5214	NA	NA	NA	NA	NA	NA	NA	NA	NA
LMP	LMP_to_MALP	Ppp1r14a	FALSE	1.05e-07	1.03e-05	28.288	2.01555	NA	NA	NA	NA	NA	NA	NA	NA	NA
LMP	LMP_to_MALP	Ppp1r18	FALSE	0.000942752	0.0339065	10.9368	0.738677	NA	NA	NA	NA	NA	NA	NA	NA	NA
LMP	LMP_to_MALP	Prc1	FALSE	0.000771395	0.0285914	11.3088	1.38294	NA	NA	NA	NA	NA	NA	NA	NA	NA
LMP	LMP_to_MALP	Prelp	FALSE	4.57e-10	6.12e-08	38.8529	1.62612	NA	NA	NA	NA	NA	NA	NA	NA	NA
LMP	LMP_to_MALP	Prex1	FALSE	1.41e-06	0.000114521	23.2654	-1.57253	NA	NA	NA	NA	NA	NA	NA	NA	NA
LMP	LMP_to_MALP	Prkab2	FALSE	0.000179617	0.00843273	14.0331	0.91233	NA	NA	NA	NA	NA	NA	NA	NA	NA
LMP	LMP_to_MALP	Prkar2b	FALSE	3.59e-08	3.82e-06	30.3606	1.08701	NA	NA	NA	NA	NA	NA	NA	NA	NA
LMP	LMP_to_MALP	Prkg2	FALSE	0.000100572	0.00512989	15.1259	-1.47436	NA	NA	NA	NA	NA	NA	NA	NA	NA
LMP	LMP_to_MALP	Pros1	FALSE	0.000109857	0.00556549	14.9593	0.795314	NA	NA	NA	NA	NA	NA	NA	NA	NA
LMP	LMP_to_MALP	Prrx1	FALSE	0.000857209	0.0311896	11.1131	0.560768	NA	NA	NA	NA	NA	NA	NA	NA	NA
LMP	LMP_to_MALP	Prss23	FALSE	0	0	126.593	1.67268	NA	NA	NA	NA	NA	NA	NA	NA	NA
LMP	LMP_to_MALP	Psd4	FALSE	9.07e-08	9.08e-06	28.5629	1.48759	NA	NA	NA	NA	NA	NA	NA	NA	NA
LMP	LMP_to_MALP	Pten	FALSE	3.8e-12	6.23e-10	48.2265	0.863326	NA	NA	NA	NA	NA	NA	NA	NA	NA
LMP	LMP_to_MALP	Ptk7	FALSE	0.00126357	0.0431689	10.395	0.67955	NA	NA	NA	NA	NA	NA	NA	NA	NA
LMP	LMP_to_MALP	Ptms	FALSE	0.0013834	0.0468231	10.2278	0.507809	NA	NA	NA	NA	NA	NA	NA	NA	NA
LMP	LMP_to_MALP	Ptpn13	FALSE	0.00016336	0.00773604	14.2116	0.893321	NA	NA	NA	NA	NA	NA	NA	NA	NA
LMP	LMP_to_MALP	Ptprd	FALSE	5.65e-08	5.87e-06	29.4805	0.777803	NA	NA	NA	NA	NA	NA	NA	NA	NA
LMP	LMP_to_MALP	Ptprz1	FALSE	4.34e-09	5.12e-07	34.467	-1.15403	NA	NA	NA	NA	NA	NA	NA	NA	NA
LMP	LMP_to_MALP	Ptx3	FALSE	0	0	107.19	1.88413	NA	NA	NA	NA	NA	NA	NA	NA	NA
LMP	LMP_to_MALP	Qrfp	FALSE	0.00115328	0.0399243	10.5637	-2.84429	NA	NA	NA	NA	NA	NA	NA	NA	NA
LMP	LMP_to_MALP	Rai14	FALSE	8.08e-05	0.00424999	15.5397	0.72989	NA	NA	NA	NA	NA	NA	NA	NA	NA
LMP	LMP_to_MALP	Rarres2	FALSE	2.95e-08	3.19e-06	30.7373	1.74199	NA	NA	NA	NA	NA	NA	NA	NA	NA
LMP	LMP_to_MALP	Rbms1	FALSE	0.000130056	0.00643822	14.641	0.607419	NA	NA	NA	NA	NA	NA	NA	NA	NA
LMP	LMP_to_MALP	Rbms3	FALSE	5.25e-11	7.7e-09	43.08	1.01452	NA	NA	NA	NA	NA	NA	NA	NA	NA
LMP	LMP_to_MALP	Rbpms	FALSE	2.27e-08	2.51e-06	31.2465	1.05047	NA	NA	NA	NA	NA	NA	NA	NA	NA
LMP	LMP_to_MALP	Rcan2	FALSE	1.36e-08	1.53e-06	32.2373	1.67874	NA	NA	NA	NA	NA	NA	NA	NA	NA
LMP	LMP_to_MALP	Reep3	FALSE	0.000817722	0.0300533	11.2006	0.561456	NA	NA	NA	NA	NA	NA	NA	NA	NA
LMP	LMP_to_MALP	Rell1	FALSE	3.21e-05	0.00189899	17.2894	0.915727	NA	NA	NA	NA	NA	NA	NA	NA	NA
LMP	LMP_to_MALP	Ret	FALSE	4.35e-05	0.00247165	16.7133	1.45026	NA	NA	NA	NA	NA	NA	NA	NA	NA
LMP	LMP_to_MALP	Retn	FALSE	0.00114589	0.0398342	10.5756	-1.51765	NA	NA	NA	NA	NA	NA	NA	NA	NA
LMP	LMP_to_MALP	Rflnb	FALSE	6.98e-05	0.00374487	15.8158	0.87436	NA	NA	NA	NA	NA	NA	NA	NA	NA
LMP	LMP_to_MALP	Rgcc	FALSE	0.00102988	0.0363808	10.7731	0.643254	NA	NA	NA	NA	NA	NA	NA	NA	NA
LMP	LMP_to_MALP	Rgs4	FALSE	3e-11	4.46e-09	44.1739	1.8349	NA	NA	NA	NA	NA	NA	NA	NA	NA
LMP	LMP_to_MALP	Rhbdl2	FALSE	3.56e-06	0.000262577	21.4882	-1.86814	NA	NA	NA	NA	NA	NA	NA	NA	NA
LMP	LMP_to_MALP	Rhob	FALSE	6e-09	6.93e-07	33.8351	0.91046	NA	NA	NA	NA	NA	NA	NA	NA	NA
LMP	LMP_to_MALP	Rhobtb3	FALSE	0.000645914	0.024609	11.6388	0.707272	NA	NA	NA	NA	NA	NA	NA	NA	NA
LMP	LMP_to_MALP	Rhoj	FALSE	3.12e-14	6.66e-12	57.6605	1.3188	NA	NA	NA	NA	NA	NA	NA	NA	NA
LMP	LMP_to_MALP	Rnf125	FALSE	0.00141742	0.0478265	10.183	0.887795	NA	NA	NA	NA	NA	NA	NA	NA	NA
LMP	LMP_to_MALP	Rnf144b	FALSE	9.97e-05	0.00509581	15.1429	-1.52192	NA	NA	NA	NA	NA	NA	NA	NA	NA
LMP	LMP_to_MALP	Rnf19a	FALSE	3.77e-12	6.23e-10	48.2394	1.17326	NA	NA	NA	NA	NA	NA	NA	NA	NA
LMP	LMP_to_MALP	Rnft1	FALSE	6.04e-05	0.00329882	16.0887	0.768867	NA	NA	NA	NA	NA	NA	NA	NA	NA
LMP	LMP_to_MALP	Rock2	FALSE	5.44e-15	1.31e-12	61.105	0.92908	NA	NA	NA	NA	NA	NA	NA	NA	NA
LMP	LMP_to_MALP	Rora	FALSE	1.29e-08	1.46e-06	32.3444	0.877207	NA	NA	NA	NA	NA	NA	NA	NA	NA
LMP	LMP_to_MALP	Rras	FALSE	3.12e-12	5.32e-10	48.6132	0.948557	NA	NA	NA	NA	NA	NA	NA	NA	NA
LMP	LMP_to_MALP	Rrm1	FALSE	2.31e-10	3.2e-08	40.1829	1.03017	NA	NA	NA	NA	NA	NA	NA	NA	NA
LMP	LMP_to_MALP	Rspo2	FALSE	0	0	81.537	2.16242	NA	NA	NA	NA	NA	NA	NA	NA	NA
LMP	LMP_to_MALP	Rspry1	FALSE	0.00104163	0.0367365	10.7521	0.737958	NA	NA	NA	NA	NA	NA	NA	NA	NA
LMP	LMP_to_MALP	Rsu1	FALSE	4.46e-06	0.000321212	21.057	0.695488	NA	NA	NA	NA	NA	NA	NA	NA	NA
LMP	LMP_to_MALP	Rtn4rl1	FALSE	5.41e-05	0.00300333	16.299	1.01927	NA	NA	NA	NA	NA	NA	NA	NA	NA
LMP	LMP_to_MALP	Runx1t1	FALSE	0.000401827	0.0166457	12.5237	1.24743	NA	NA	NA	NA	NA	NA	NA	NA	NA
LMP	LMP_to_MALP	S100a11	FALSE	1.77e-05	0.00110118	18.4215	0.567948	NA	NA	NA	NA	NA	NA	NA	NA	NA
LMP	LMP_to_MALP	S1pr1	FALSE	3.87e-09	4.59e-07	34.6891	1.0359	NA	NA	NA	NA	NA	NA	NA	NA	NA
LMP	LMP_to_MALP	S1pr3	FALSE	1.28e-05	0.000836482	19.0462	0.986815	NA	NA	NA	NA	NA	NA	NA	NA	NA
LMP	LMP_to_MALP	Samd9l	FALSE	0.00131825	0.0448268	10.3168	1.00697	NA	NA	NA	NA	NA	NA	NA	NA	NA
LMP	LMP_to_MALP	Samhd1	FALSE	3.22e-06	0.000240096	21.6794	0.713128	NA	NA	NA	NA	NA	NA	NA	NA	NA
LMP	LMP_to_MALP	Sav1	FALSE	0.000160027	0.00761123	14.2504	0.699955	NA	NA	NA	NA	NA	NA	NA	NA	NA
LMP	LMP_to_MALP	Scp2	FALSE	1.99e-06	0.000156483	22.609	0.661128	NA	NA	NA	NA	NA	NA	NA	NA	NA
LMP	LMP_to_MALP	Sctr	FALSE	2.4e-05	0.0014579	17.8442	0.909047	NA	NA	NA	NA	NA	NA	NA	NA	NA
LMP	LMP_to_MALP	Scube1	FALSE	0.000293818	0.0126655	13.1094	-2.18419	NA	NA	NA	NA	NA	NA	NA	NA	NA
LMP	LMP_to_MALP	Sdc2	FALSE	6.58e-07	5.8e-05	24.7342	0.652745	NA	NA	NA	NA	NA	NA	NA	NA	NA
LMP	LMP_to_MALP	Serinc3	FALSE	0.000522148	0.0207632	12.0349	0.551858	NA	NA	NA	NA	NA	NA	NA	NA	NA
LMP	LMP_to_MALP	Serpinb2	FALSE	1.2e-08	1.37e-06	32.4825	-4.41616	NA	NA	NA	NA	NA	NA	NA	NA	NA
LMP	LMP_to_MALP	Serpine1	FALSE	0	0	99.3766	1.46758	NA	NA	NA	NA	NA	NA	NA	NA	NA
LMP	LMP_to_MALP	Serping1	FALSE	0	0	126.154	1.55977	NA	NA	NA	NA	NA	NA	NA	NA	NA
LMP	LMP_to_MALP	Sertad4	FALSE	0.000231293	0.0104068	13.5581	1.53117	NA	NA	NA	NA	NA	NA	NA	NA	NA
LMP	LMP_to_MALP	Setbp1	FALSE	9.51e-05	0.00488306	15.2323	1.03929	NA	NA	NA	NA	NA	NA	NA	NA	NA
LMP	LMP_to_MALP	Sfrp1	FALSE	0	0	91.9926	1.92542	NA	NA	NA	NA	NA	NA	NA	NA	NA
LMP	LMP_to_MALP	Sgce	FALSE	0.000261612	0.0116035	13.327	0.767045	NA	NA	NA	NA	NA	NA	NA	NA	NA
LMP	LMP_to_MALP	Sgcg	FALSE	1.11e-09	1.38e-07	37.1287	1.45406	NA	NA	NA	NA	NA	NA	NA	NA	NA
LMP	LMP_to_MALP	Sgms2	FALSE	8.61e-07	7.34e-05	24.2169	-0.862253	NA	NA	NA	NA	NA	NA	NA	NA	NA
LMP	LMP_to_MALP	Sh3bgrl	FALSE	2.22e-16	6.14e-14	67.8609	0.83234	NA	NA	NA	NA	NA	NA	NA	NA	NA
LMP	LMP_to_MALP	Sh3kbp1	FALSE	3.93e-05	0.00227344	16.9068	0.73216	NA	NA	NA	NA	NA	NA	NA	NA	NA
LMP	LMP_to_MALP	Shc1	FALSE	5.69e-07	5.09e-05	25.0157	0.791656	NA	NA	NA	NA	NA	NA	NA	NA	NA
LMP	LMP_to_MALP	Sipa1l1	FALSE	0.000132033	0.00652131	14.6125	1.02338	NA	NA	NA	NA	NA	NA	NA	NA	NA
LMP	LMP_to_MALP	Ski	FALSE	0.000457631	0.0186739	12.2808	0.640466	NA	NA	NA	NA	NA	NA	NA	NA	NA
LMP	LMP_to_MALP	Slc13a5	FALSE	0	0	72.3413	-1.51676	NA	NA	NA	NA	NA	NA	NA	NA	NA
LMP	LMP_to_MALP	Slc1a6	FALSE	0.000617245	0.023682	11.7232	2.25525	NA	NA	NA	NA	NA	NA	NA	NA	NA
LMP	LMP_to_MALP	Slc20a2	FALSE	0.00139036	0.0469861	10.2185	0.996872	NA	NA	NA	NA	NA	NA	NA	NA	NA
LMP	LMP_to_MALP	Slc29a1	FALSE	1.29e-08	1.46e-06	32.3433	0.78368	NA	NA	NA	NA	NA	NA	NA	NA	NA
LMP	LMP_to_MALP	Slc2a1	FALSE	4.53e-05	0.00254632	16.6372	0.819425	NA	NA	NA	NA	NA	NA	NA	NA	NA
LMP	LMP_to_MALP	Slc2a4	FALSE	0	0	96.4072	0.689625	NA	NA	NA	NA	NA	NA	NA	NA	NA
LMP	LMP_to_MALP	Slc36a2	FALSE	2.36e-05	0.00144343	17.8738	-0.967001	NA	NA	NA	NA	NA	NA	NA	NA	NA
LMP	LMP_to_MALP	Slc38a1	FALSE	0.000974707	0.0348833	10.875	0.854966	NA	NA	NA	NA	NA	NA	NA	NA	NA
LMP	LMP_to_MALP	Slc44a2	FALSE	0.000283842	0.0123437	13.1741	0.800661	NA	NA	NA	NA	NA	NA	NA	NA	NA
LMP	LMP_to_MALP	Slc5a3	FALSE	1.45e-13	2.82e-11	54.6406	1.3583	NA	NA	NA	NA	NA	NA	NA	NA	NA
LMP	LMP_to_MALP	Slc6a6	FALSE	3.58e-12	5.96e-10	48.3431	1.13071	NA	NA	NA	NA	NA	NA	NA	NA	NA
LMP	LMP_to_MALP	Slc8a3	FALSE	5.2e-07	4.69e-05	25.1886	-1.35809	NA	NA	NA	NA	NA	NA	NA	NA	NA
LMP	LMP_to_MALP	Slfn5	FALSE	0.000983932	0.03509	10.8576	1.05737	NA	NA	NA	NA	NA	NA	NA	NA	NA
LMP	LMP_to_MALP	Slmap	FALSE	1.94e-09	2.36e-07	36.0305	1.08401	NA	NA	NA	NA	NA	NA	NA	NA	NA
LMP	LMP_to_MALP	Slpi	FALSE	0.000189113	0.00876546	13.9363	-1.23057	NA	NA	NA	NA	NA	NA	NA	NA	NA
LMP	LMP_to_MALP	Smad6	FALSE	0.000390718	0.0162163	12.5761	0.707187	NA	NA	NA	NA	NA	NA	NA	NA	NA
LMP	LMP_to_MALP	Smarca1	FALSE	8.05e-06	0.000556154	19.9259	1.2282	NA	NA	NA	NA	NA	NA	NA	NA	NA
LMP	LMP_to_MALP	Smtn	FALSE	0.000161579	0.00766834	14.2322	0.844617	NA	NA	NA	NA	NA	NA	NA	NA	NA
LMP	LMP_to_MALP	Smurf2	FALSE	1.35e-09	1.67e-07	36.7394	0.857548	NA	NA	NA	NA	NA	NA	NA	NA	NA
LMP	LMP_to_MALP	Snai2	FALSE	5.94e-13	1.1e-10	51.8668	1.21378	NA	NA	NA	NA	NA	NA	NA	NA	NA
LMP	LMP_to_MALP	Sncaip	FALSE	0.00115397	0.0399243	10.5626	0.948831	NA	NA	NA	NA	NA	NA	NA	NA	NA
LMP	LMP_to_MALP	Sned1	FALSE	4.03e-07	3.73e-05	25.6802	1.74413	NA	NA	NA	NA	NA	NA	NA	NA	NA
LMP	LMP_to_MALP	Snta1	FALSE	3.64e-05	0.00213046	17.0514	0.643472	NA	NA	NA	NA	NA	NA	NA	NA	NA
LMP	LMP_to_MALP	Snx18	FALSE	0.00147646	0.0495124	10.1078	0.66844	NA	NA	NA	NA	NA	NA	NA	NA	NA
LMP	LMP_to_MALP	Sod3	FALSE	1.92e-14	4.32e-12	58.6105	1.49613	NA	NA	NA	NA	NA	NA	NA	NA	NA
LMP	LMP_to_MALP	Sorbs1	FALSE	8.45e-14	1.68e-11	55.698	1.99459	NA	NA	NA	NA	NA	NA	NA	NA	NA
LMP	LMP_to_MALP	Sorbs2	FALSE	1.58e-05	0.00100877	18.6381	0.927148	NA	NA	NA	NA	NA	NA	NA	NA	NA
LMP	LMP_to_MALP	Sox6os	FALSE	1.15e-12	2.07e-10	50.5614	0.885763	NA	NA	NA	NA	NA	NA	NA	NA	NA
LMP	LMP_to_MALP	Spata33	FALSE	0.000927448	0.0334663	10.9671	1.72083	NA	NA	NA	NA	NA	NA	NA	NA	NA
LMP	LMP_to_MALP	Spns2	FALSE	8.55e-05	0.00446439	15.4331	-1.14035	NA	NA	NA	NA	NA	NA	NA	NA	NA
LMP	LMP_to_MALP	Sptbn1	FALSE	4.56e-05	0.00255643	16.6248	0.712484	NA	NA	NA	NA	NA	NA	NA	NA	NA
LMP	LMP_to_MALP	Sqor	FALSE	1.09e-06	9.02e-05	23.7599	1.18432	NA	NA	NA	NA	NA	NA	NA	NA	NA
LMP	LMP_to_MALP	Srf	FALSE	0.000934447	0.0336632	10.9531	0.78311	NA	NA	NA	NA	NA	NA	NA	NA	NA
LMP	LMP_to_MALP	Srpx	FALSE	1.7e-12	2.94e-10	49.8077	1.13626	NA	NA	NA	NA	NA	NA	NA	NA	NA
LMP	LMP_to_MALP	Srpx2	FALSE	0.00107302	0.0376004	10.6971	0.577102	NA	NA	NA	NA	NA	NA	NA	NA	NA
LMP	LMP_to_MALP	Sspn	FALSE	0.00012638	0.00628473	14.695	0.873985	NA	NA	NA	NA	NA	NA	NA	NA	NA
LMP	LMP_to_MALP	St5	FALSE	0.000148278	0.00715183	14.394	0.977421	NA	NA	NA	NA	NA	NA	NA	NA	NA
LMP	LMP_to_MALP	Stat1	FALSE	0.000468426	0.0190078	12.2373	0.982186	NA	NA	NA	NA	NA	NA	NA	NA	NA
LMP	LMP_to_MALP	Steap2	FALSE	5.85e-05	0.00321631	16.1499	1.01757	NA	NA	NA	NA	NA	NA	NA	NA	NA
LMP	LMP_to_MALP	Stk17b	FALSE	3.59e-05	0.00211086	17.0782	0.675538	NA	NA	NA	NA	NA	NA	NA	NA	NA
LMP	LMP_to_MALP	Suco	FALSE	1.05e-05	0.000701718	19.4163	0.89407	NA	NA	NA	NA	NA	NA	NA	NA	NA
LMP	LMP_to_MALP	Sult1a1	FALSE	6.94e-07	6.07e-05	24.6327	1.64813	NA	NA	NA	NA	NA	NA	NA	NA	NA
LMP	LMP_to_MALP	Svep1	FALSE	9.07e-14	1.78e-11	55.5599	1.81597	NA	NA	NA	NA	NA	NA	NA	NA	NA
LMP	LMP_to_MALP	Synpo2	FALSE	1.6e-11	2.45e-09	45.4024	2.79725	NA	NA	NA	NA	NA	NA	NA	NA	NA
LMP	LMP_to_MALP	Tab2	FALSE	8.88e-05	0.00461552	15.3611	0.672267	NA	NA	NA	NA	NA	NA	NA	NA	NA
LMP	LMP_to_MALP	Tagln	FALSE	0	0	99.5414	1.72419	NA	NA	NA	NA	NA	NA	NA	NA	NA
LMP	LMP_to_MALP	Taok1	FALSE	0.000429986	0.017678	12.3972	0.6342	NA	NA	NA	NA	NA	NA	NA	NA	NA
LMP	LMP_to_MALP	Tbl1xr1	FALSE	0.000185178	0.00867517	13.9758	0.771612	NA	NA	NA	NA	NA	NA	NA	NA	NA
LMP	LMP_to_MALP	Tbx15	FALSE	0.000187186	0.00871558	13.9555	0.876556	NA	NA	NA	NA	NA	NA	NA	NA	NA
LMP	LMP_to_MALP	Tcaf1	FALSE	0.000842353	0.0307782	11.1455	0.745798	NA	NA	NA	NA	NA	NA	NA	NA	NA
LMP	LMP_to_MALP	Tead1	FALSE	2.55e-06	0.000194792	22.127	0.772813	NA	NA	NA	NA	NA	NA	NA	NA	NA
LMP	LMP_to_MALP	Tfpi	FALSE	0.00107127	0.0375993	10.7002	0.919269	NA	NA	NA	NA	NA	NA	NA	NA	NA
LMP	LMP_to_MALP	Tgfb1i1	FALSE	1.77e-11	2.69e-09	45.2074	0.945882	NA	NA	NA	NA	NA	NA	NA	NA	NA
LMP	LMP_to_MALP	Tgfb2	FALSE	0.00121141	0.0415824	10.4729	0.779823	NA	NA	NA	NA	NA	NA	NA	NA	NA
LMP	LMP_to_MALP	Tgfb3	FALSE	0	0	82.7252	1.79244	NA	NA	NA	NA	NA	NA	NA	NA	NA
LMP	LMP_to_MALP	Thbs1	FALSE	2.78e-15	7.05e-13	62.3824	1.04316	NA	NA	NA	NA	NA	NA	NA	NA	NA
LMP	LMP_to_MALP	Thbs2	FALSE	0	0	132.311	1.38977	NA	NA	NA	NA	NA	NA	NA	NA	NA
LMP	LMP_to_MALP	Thbs4	FALSE	0	0	82.5189	-2.06343	NA	NA	NA	NA	NA	NA	NA	NA	NA
LMP	LMP_to_MALP	Thra	FALSE	5.86e-05	0.00321631	16.1462	0.728897	NA	NA	NA	NA	NA	NA	NA	NA	NA
LMP	LMP_to_MALP	Thsd7a	FALSE	0.000470107	0.0190406	12.2307	1.92248	NA	NA	NA	NA	NA	NA	NA	NA	NA
LMP	LMP_to_MALP	Tifa	FALSE	0.000436328	0.0178714	12.3698	0.991547	NA	NA	NA	NA	NA	NA	NA	NA	NA
LMP	LMP_to_MALP	Timp2	FALSE	0.000528726	0.0209866	12.0115	0.537676	NA	NA	NA	NA	NA	NA	NA	NA	NA
LMP	LMP_to_MALP	Timp3	FALSE	7.97e-05	0.00421795	15.5644	0.774065	NA	NA	NA	NA	NA	NA	NA	NA	NA
LMP	LMP_to_MALP	Tle2	FALSE	0.000239043	0.0107157	13.4962	1.05011	NA	NA	NA	NA	NA	NA	NA	NA	NA
LMP	LMP_to_MALP	Tln2	FALSE	1.14e-14	2.63e-12	59.6408	1.55641	NA	NA	NA	NA	NA	NA	NA	NA	NA
LMP	LMP_to_MALP	Tmem176a	FALSE	4.21e-06	0.00030711	21.1685	0.663843	NA	NA	NA	NA	NA	NA	NA	NA	NA
LMP	LMP_to_MALP	Tmem176b	FALSE	9.45e-05	0.00486353	15.2443	0.600393	NA	NA	NA	NA	NA	NA	NA	NA	NA
LMP	LMP_to_MALP	Tmem2	FALSE	1.56e-09	1.92e-07	36.4622	1.05344	NA	NA	NA	NA	NA	NA	NA	NA	NA
LMP	LMP_to_MALP	Tmem238	FALSE	0.000742264	0.0277472	11.3803	-0.760095	NA	NA	NA	NA	NA	NA	NA	NA	NA
LMP	LMP_to_MALP	Tmem45a	FALSE	3.51e-06	0.000259845	21.5147	0.784646	NA	NA	NA	NA	NA	NA	NA	NA	NA
LMP	LMP_to_MALP	Tmem47	FALSE	9.05e-12	1.42e-09	46.5239	1.21357	NA	NA	NA	NA	NA	NA	NA	NA	NA
LMP	LMP_to_MALP	Tmem86a	FALSE	3.15e-06	0.000235381	21.724	1.02795	NA	NA	NA	NA	NA	NA	NA	NA	NA
LMP	LMP_to_MALP	Tmsb4x	FALSE	6.31e-10	8.25e-08	38.2218	0.744116	NA	NA	NA	NA	NA	NA	NA	NA	NA
LMP	LMP_to_MALP	Tnc	FALSE	4.41e-07	4.04e-05	25.5068	0.836695	NA	NA	NA	NA	NA	NA	NA	NA	NA
LMP	LMP_to_MALP	Tnks	FALSE	0.000472029	0.0190831	12.223	0.734511	NA	NA	NA	NA	NA	NA	NA	NA	NA
LMP	LMP_to_MALP	Tnrc18	FALSE	0.000164552	0.00777562	14.1979	0.722226	NA	NA	NA	NA	NA	NA	NA	NA	NA
LMP	LMP_to_MALP	Tnrc6b	FALSE	0.000289986	0.0125609	13.134	0.675226	NA	NA	NA	NA	NA	NA	NA	NA	NA
LMP	LMP_to_MALP	Tpm1	FALSE	0	0	77.631	0.853132	NA	NA	NA	NA	NA	NA	NA	NA	NA
LMP	LMP_to_MALP	Tpm2	FALSE	0	0	97.1198	1.20709	NA	NA	NA	NA	NA	NA	NA	NA	NA
LMP	LMP_to_MALP	Tpm4	FALSE	0	0	79.9961	0.866109	NA	NA	NA	NA	NA	NA	NA	NA	NA
LMP	LMP_to_MALP	Trabd2b	FALSE	4.74e-07	4.33e-05	25.3688	1.56115	NA	NA	NA	NA	NA	NA	NA	NA	NA
LMP	LMP_to_MALP	Trp53inp2	FALSE	9.28e-07	7.83e-05	24.071	1.13573	NA	NA	NA	NA	NA	NA	NA	NA	NA
LMP	LMP_to_MALP	Trps1	FALSE	0.000294676	0.0126655	13.1039	0.686441	NA	NA	NA	NA	NA	NA	NA	NA	NA
LMP	LMP_to_MALP	Trpv2	FALSE	1.58e-06	0.000127636	23.0498	1.09001	NA	NA	NA	NA	NA	NA	NA	NA	NA
LMP	LMP_to_MALP	Tsc22d3	FALSE	7.37e-05	0.0039341	15.7133	0.654633	NA	NA	NA	NA	NA	NA	NA	NA	NA
LMP	LMP_to_MALP	Tspan18	FALSE	2.26e-06	0.000173413	22.3637	1.23817	NA	NA	NA	NA	NA	NA	NA	NA	NA
LMP	LMP_to_MALP	Ttc28	FALSE	0	0	91.1958	1.32644	NA	NA	NA	NA	NA	NA	NA	NA	NA
LMP	LMP_to_MALP	Ttyh3	FALSE	0.000155032	0.00741324	14.3101	1.03156	NA	NA	NA	NA	NA	NA	NA	NA	NA
LMP	LMP_to_MALP	Tuba1c	FALSE	0.000311775	0.013372	12.9983	0.653664	NA	NA	NA	NA	NA	NA	NA	NA	NA
LMP	LMP_to_MALP	Ube2l6	FALSE	0.000538097	0.021249	11.9788	1.04158	NA	NA	NA	NA	NA	NA	NA	NA	NA
LMP	LMP_to_MALP	Ubr1	FALSE	0.00128508	0.0437686	10.3638	0.810545	NA	NA	NA	NA	NA	NA	NA	NA	NA
LMP	LMP_to_MALP	Ugcg	FALSE	3.81e-09	4.55e-07	34.7182	1.11087	NA	NA	NA	NA	NA	NA	NA	NA	NA
LMP	LMP_to_MALP	Ugp2	FALSE	5.42e-05	0.00300333	16.2951	0.668995	NA	NA	NA	NA	NA	NA	NA	NA	NA
LMP	LMP_to_MALP	Usp25	FALSE	3.59e-08	3.82e-06	30.3584	0.934652	NA	NA	NA	NA	NA	NA	NA	NA	NA
LMP	LMP_to_MALP	Vamp5	FALSE	1.48e-05	0.00094976	18.7642	1.00912	NA	NA	NA	NA	NA	NA	NA	NA	NA
LMP	LMP_to_MALP	Vasp	FALSE	0.000360314	0.0152147	12.7275	0.631887	NA	NA	NA	NA	NA	NA	NA	NA	NA
LMP	LMP_to_MALP	Vcan	FALSE	1.17e-06	9.54e-05	23.6315	1.16939	NA	NA	NA	NA	NA	NA	NA	NA	NA
LMP	LMP_to_MALP	Vcl	FALSE	0	0	162.058	1.39035	NA	NA	NA	NA	NA	NA	NA	NA	NA
LMP	LMP_to_MALP	Vegfa	FALSE	0.000121681	0.0061067	14.7665	0.648339	NA	NA	NA	NA	NA	NA	NA	NA	NA
LMP	LMP_to_MALP	Vegfd	FALSE	0.00147484	0.0495124	10.1098	2.05794	NA	NA	NA	NA	NA	NA	NA	NA	NA
LMP	LMP_to_MALP	Vgll3	FALSE	0	0	123.553	1.67459	NA	NA	NA	NA	NA	NA	NA	NA	NA
LMP	LMP_to_MALP	Vwa1	FALSE	9.73e-06	0.000655714	19.5634	1.70587	NA	NA	NA	NA	NA	NA	NA	NA	NA
LMP	LMP_to_MALP	Wdfy1	FALSE	2.77e-10	3.8e-08	39.8304	1.03806	NA	NA	NA	NA	NA	NA	NA	NA	NA
LMP	LMP_to_MALP	Wdr1	FALSE	3.85e-05	0.00224257	16.9429	0.629811	NA	NA	NA	NA	NA	NA	NA	NA	NA
LMP	LMP_to_MALP	Wisp2	FALSE	0	0	121.991	1.83062	NA	NA	NA	NA	NA	NA	NA	NA	NA
LMP	LMP_to_MALP	Wnt5a	FALSE	1.47e-05	0.000947249	18.7749	0.980912	NA	NA	NA	NA	NA	NA	NA	NA	NA
LMP	LMP_to_MALP	Wscd2	FALSE	0.00112408	0.0392638	10.6111	-2.16092	NA	NA	NA	NA	NA	NA	NA	NA	NA
LMP	LMP_to_MALP	Wwc2	FALSE	0.00121056	0.0415824	10.4742	0.633065	NA	NA	NA	NA	NA	NA	NA	NA	NA
LMP	LMP_to_MALP	Zbtb20	FALSE	1.98e-09	2.39e-07	35.9903	0.7691	NA	NA	NA	NA	NA	NA	NA	NA	NA
LMP	LMP_to_MALP	Zc2hc1a	FALSE	1.17e-06	9.54e-05	23.6334	0.970264	NA	NA	NA	NA	NA	NA	NA	NA	NA
LMP	LMP_to_MALP	Zeb2	FALSE	0.000884629	0.0320803	11.0547	0.570489	NA	NA	NA	NA	NA	NA	NA	NA	NA
LMP	LMP_to_MALP	Zfhx4	FALSE	2.41e-07	2.29e-05	26.6744	0.880127	NA	NA	NA	NA	NA	NA	NA	NA	NA
LMP	LMP_to_MALP	Zfp36l2	FALSE	7.8e-08	7.95e-06	28.856	0.853828	NA	NA	NA	NA	NA	NA	NA	NA	NA
LMP	LMP_to_MALP	Zfp395	FALSE	0.00122922	0.0420613	10.4459	0.815824	NA	NA	NA	NA	NA	NA	NA	NA	NA
LMP	LMP_to_MALP	Zfp503	FALSE	2.92e-06	0.000218794	21.8708	1.06163	NA	NA	NA	NA	NA	NA	NA	NA	NA
LMP	LMP_to_MALP	Zfp516	FALSE	0.000950569	0.0341314	10.9215	0.753686	NA	NA	NA	NA	NA	NA	NA	NA	NA
LMP	LMP_to_MALP	Zyx	FALSE	4.34e-06	0.000314455	21.1104	0.805846	NA	NA	NA	NA	NA	NA	NA	NA	NA
MALP	MALP_to_end	Alad	TRUE	2.68e-06	7.56e-05	22.0315	1.86091	4	62.977885999999998	10.91655993	62.304259000000002	63.525236999999997	-	62509169	62519918	468717
MALP	MALP_to_end	Ephx2	TRUE	5.99e-07	1.85e-05	24.9163	2.60124	14	65.344255000000004	11.04473211	63.764673999999999	66.257656999999995	-	66084374	66124500	740119
MALP	MALP_to_end	Fbln5	TRUE	1.11e-16	1.14e-14	69.3563	-4.3632	12	102.66243299999999	11.202204869999999	100.87664599999999	103.041089	-	101746565	101819055	915868
MALP	MALP_to_end	Gas1	TRUE	3.87e-06	0.000106579	21.3275	-3.28605	13	60.243979000000003	11.86013876	59.881225000000001	63.281638999999998	-	60174405	60177365	69574
MALP	MALP_to_end	Gdpd3	TRUE	0.00106969	0.0167401	10.7029	2.88816	7	126.08645300000001	21.639606959999998	126.084311	126.093411	+	126766334	126775649	679881
MALP	MALP_to_end	Hebp2	TRUE	0.000200249	0.00387901	13.8287	-3.72247	10	18.555084999999998	13.051142929999999	18.285361999999999	19.583048000000002	-	18539498	18546076	15587
MALP	MALP_to_end	Isoc2a	TRUE	1.69e-05	0.000412492	18.509	1.8861	7	4.8180480000000001	11.814595110000001	4.4058359999999999	4.9527640000000002	+	4877153	4896973	59105
MALP	MALP_to_end	Kcns3	TRUE	0	0	73.6282	5.13141	12	10.936647000000001	19.060533540000002	10.436823	11.232331	-	11090202	11151056	153555
MALP	MALP_to_end	Mxra7	TRUE	8.25e-06	0.000212028	19.88	-3.68426	11	116.868494	10.068620470000001	116.644148	116.928804	-	116803062	116828046	65432
MALP	MALP_to_end	Olfml3	TRUE	2.22e-16	2.24e-14	67.8431	-5.16672	3	103.712039	10.57967959	103.075766	104.224259	-	103722222	103738001	10183
MALP	MALP_to_end	Ppic	TRUE	3.11e-15	2.84e-13	62.1915	-2.0134	18	53.227209000000002	12.72610225	53.171404000000003	54.072738999999999	-	53406332	53418115	179123
MALP	MALP_to_end	Rarres1	TRUE	5.49e-08	2.01e-06	29.537	2.83684	3	66.561870999999996	12.65871776	66.091649000000004	68.082417000000007	-	67478972	67515523	917101
MALP	MALP_to_end	Retsat	TRUE	2.16e-12	1.42e-10	49.3287	2.42641	6	72.975607999999994	12.830552920000001	72.635895000000005	76.802497000000002	+	72598475	72608425	377133
MALP	MALP_to_end	Rpl21	TRUE	1.35e-09	6.08e-08	36.7361	-1.29715	5	146.79360500000001	13.358219220000001	146.682242	146.92421200000001	+	146832890	146837032	39285
MALP	MALP_to_end	Rpl26	TRUE	4.31e-08	1.6e-06	30.006	-1.20338	11	68.725138999999999	17.28183572	67.917180000000002	69.024400999999997	+	68901583	68906989	176444
MALP	MALP_to_end	Rpl29	TRUE	5.61e-06	0.000149576	20.6164	-1.70015	9	106.143213	14.437215950000001	105.793572	106.561335	+	106429454	106431568	286241
MALP	MALP_to_end	Rps14	TRUE	4.93e-09	2.07e-07	34.2167	-1.16892	18	60.929412999999997	9.9209926230000001	60.051264000000003	61.211100000000002	+	60747098	60778546	182315
MALP	MALP_to_end	Rps3a1	TRUE	1.75e-10	8.62e-09	40.7292	-1.38327	3	86.475110999999998	19.840758260000001	84.557417000000001	86.897372000000004	-	86137940	86142702	337171
MALP	MALP_to_end	Rps9	TRUE	5.21e-14	4.18e-12	56.649	-1.49551	7	4.1416500000000003	10.07969778	3.4190860000000001	4.2152529999999997	+	3703993	3706897	437657
MALP	MALP_to_end	St6galnac2	TRUE	0.000915344	0.0146825	10.9914	1.65594	11	116.686269	14.446746750000001	116.65692900000001	116.793931	-	116675303	116694868	10966
MALP	MALP_to_end	Ucp2	TRUE	4.09e-06	0.000112094	21.2235	2.2709	7	100.010935	15.67667333	99.903368999999998	100.943348	+	100493337	100502020	482402
MALP	MALP_to_end	0610040F04Rik	FALSE	0.00224289	0.0314885	9.33932	5.12551	NA	NA	NA	NA	NA	NA	NA	NA	NA
MALP	MALP_to_end	1110008P14Rik	FALSE	0.00288954	0.0390115	8.87594	1.02217	NA	NA	NA	NA	NA	NA	NA	NA	NA
MALP	MALP_to_end	1190005I06Rik	FALSE	7.37e-07	2.25e-05	24.5162	2.80551	NA	NA	NA	NA	NA	NA	NA	NA	NA
MALP	MALP_to_end	1500009L16Rik	FALSE	2.28e-08	8.77e-07	31.2388	-2.72711	NA	NA	NA	NA	NA	NA	NA	NA	NA
MALP	MALP_to_end	1700017B05Rik	FALSE	1.18e-07	4.1e-06	28.0502	1.95347	NA	NA	NA	NA	NA	NA	NA	NA	NA
MALP	MALP_to_end	1700020L24Rik	FALSE	1.26e-05	0.000313788	19.0737	4.25994	NA	NA	NA	NA	NA	NA	NA	NA	NA
MALP	MALP_to_end	1700029I15Rik	FALSE	0	0	86.1381	4.37163	NA	NA	NA	NA	NA	NA	NA	NA	NA
MALP	MALP_to_end	1700056N10Rik	FALSE	0.000228533	0.00437256	13.5806	3.2699	NA	NA	NA	NA	NA	NA	NA	NA	NA
MALP	MALP_to_end	1700093K21Rik	FALSE	0.000581771	0.00986075	11.8334	3.44655	NA	NA	NA	NA	NA	NA	NA	NA	NA
MALP	MALP_to_end	2010106E10Rik	FALSE	5.23e-12	3.28e-10	47.6002	6.19251	NA	NA	NA	NA	NA	NA	NA	NA	NA
MALP	MALP_to_end	2210406O10Rik	FALSE	0.000152823	0.0030608	14.3371	2.4024	NA	NA	NA	NA	NA	NA	NA	NA	NA
MALP	MALP_to_end	2300009A05Rik	FALSE	3.55e-07	1.14e-05	25.9224	1.96099	NA	NA	NA	NA	NA	NA	NA	NA	NA
MALP	MALP_to_end	2310001K24Rik	FALSE	0.00299664	0.0402583	8.80951	2.9471	NA	NA	NA	NA	NA	NA	NA	NA	NA
[truncated: 1,663 more rows]

## Sheet: Supplementary File 2e
cell_type	cell_type_boundary	Gene	DO_eQTL_eGene	Pvalue_global	Pvalue_adj_global	global_waldStat	chr	pos	lod	ci_lo	ci_hi	Strand	Start	End	dist_start
[truncated: 13,285 more rows]

[truncated: 6 more sheets: Supplementary File 2f, Supplementary File 2g, Supplementary File 2h, Supplementary File 2i, Supplementary File 2j, Supplementary File 2k]
