# Supplementary material for: Cell type-specific network analysis in Diversity Outbred mice identifies genes potentially responsible for human bone mineral density GWAS associations
Source: bioRxiv preprint, doi:10.1101/2024.05.20.594981, version 4 (2026-02-08)
Supplement: Supplementary_File_3 [file 594981_file04.xlsx]

## Sheet: Supplementary File 3a
GO biological process complete	Mus musculus - REFLIST (21983)	Client Text Box Input (125)	Client Text Box Input (expected)	Client Text Box Input (over/under)	Client Text Box Input (fold Enrichment)	Client Text Box Input (raw P-value)
endoplasmic reticulum to Golgi vesicle-mediated transport (GO:0006888)	115	10	0.65	+	15.29	2.38e-09
mitotic nuclear division (GO:0140014)	157	11	0.89	+	12.32	3.08e-09
nuclear division (GO:0000280)	324	14	1.84	+	7.6	7.75e-09
sister chromatid segregation (GO:0000819)	135	10	0.77	+	13.03	1e-08
organelle fission (GO:0048285)	351	14	2	+	7.01	2.04e-08
cell division (GO:0051301)	511	16	2.91	+	5.51	4.94e-08
microtubule cytoskeleton organization involved in mitosis (GO:1902850)	129	9	0.73	+	12.27	9.17e-08
mitotic sister chromatid segregation (GO:0000070)	131	9	0.74	+	12.08	1.04e-07
mitotic spindle organization (GO:0007052)	94	8	0.53	+	14.97	1.17e-07
nuclear chromosome segregation (GO:0098813)	234	11	1.33	+	8.27	1.51e-07
mitotic cell cycle process (GO:1903047)	491	15	2.79	+	5.37	1.82e-07
Golgi vesicle transport (GO:0048193)	265	11	1.51	+	7.3	4.96e-07
cellular response to stress (GO:0033554)	1534	26	8.72	+	2.98	5.15e-07
cell cycle process (GO:0022402)	871	19	4.95	+	3.84	6.17e-07
carbohydrate biosynthetic process (GO:0016051)	123	8	0.7	+	11.44	8.06e-07
mitotic cell cycle (GO:0000278)	555	15	3.16	+	4.75	8.2e-07
mitotic spindle assembly (GO:0090307)	51	6	0.29	+	20.69	8.3e-07
cell cycle (GO:0007049)	1289	23	7.33	+	3.14	1.12e-06
regulation of cell cycle (GO:0051726)	1078	20	6.13	+	3.26	3.49e-06
chromosome segregation (GO:0007059)	331	11	1.88	+	5.84	3.99e-06
spindle organization (GO:0007051)	160	8	0.91	+	8.79	5.2e-06
extracellular matrix organization (GO:0030198)	278	10	1.58	+	6.33	5.72e-06
external encapsulating structure organization (GO:0045229)	279	10	1.59	+	6.3	5.89e-06
extracellular structure organization (GO:0043062)	280	10	1.59	+	6.28	6.07e-06
regulation of cell cycle process (GO:0010564)	747	16	4.25	+	3.77	6.49e-06
chromosome organization (GO:0051276)	435	12	2.47	+	4.85	9.03e-06
aldehyde biosynthetic process (GO:0046184)	20	4	0.11	+	35.17	9.48e-06
cellular response to hypoxia (GO:0071456)	92	6	0.52	+	11.47	1.99e-05
spindle assembly (GO:0051225)	95	6	0.54	+	11.11	2.37e-05
regulation of cell population proliferation (GO:0042127)	1786	25	10.16	+	2.46	2.43e-05
regulation of mitotic sister chromatid segregation (GO:0033047)	57	5	0.32	+	15.43	2.67e-05
collagen fibril organization (GO:0030199)	57	5	0.32	+	15.43	2.67e-05
protein hydroxylation (GO:0018126)	27	4	0.15	+	26.05	2.72e-05
mitotic spindle midzone assembly (GO:0051256)	8	3	0.05	+	65.95	2.82e-05
mitotic spindle elongation (GO:0000022)	8	3	0.05	+	65.95	2.82e-05
cellular response to decreased oxygen levels (GO:0036294)	99	6	0.56	+	10.66	2.95e-05
carbohydrate catabolic process (GO:0016052)	99	6	0.56	+	10.66	2.95e-05
regulation of mitotic sister chromatid separation (GO:0010965)	59	5	0.34	+	14.9	3.11e-05
response to hypoxia (GO:0001666)	207	8	1.18	+	6.8	3.12e-05
positive regulation of cell cycle process (GO:0090068)	272	9	1.55	+	5.82	3.22e-05
regulation of apoptotic process (GO:0042981)	1604	23	9.12	+	2.52	3.78e-05
regulation of sister chromatid segregation (GO:0033045)	105	6	0.6	+	10.05	4.04e-05
positive regulation of cell cycle (GO:0045787)	355	10	2.02	+	4.95	4.39e-05
spindle midzone assembly (GO:0051255)	10	3	0.06	+	52.76	4.84e-05
response to decreased oxygen levels (GO:0036293)	221	8	1.26	+	6.37	4.88e-05
mitotic spindle assembly checkpoint signaling (GO:0007094)	33	4	0.19	+	21.32	5.57e-05
spindle assembly checkpoint signaling (GO:0071173)	33	4	0.19	+	21.32	5.57e-05
regulation of programmed cell death (GO:0043067)	1655	23	9.41	+	2.44	6.09e-05
peptidyl-proline hydroxylation to 4-hydroxy-L-proline (GO:0018401)	11	3	0.06	+	47.96	6.14e-05
spindle elongation (GO:0051231)	11	3	0.06	+	47.96	6.14e-05
cellular response to oxygen levels (GO:0071453)	115	6	0.65	+	9.18	6.55e-05
mitotic spindle checkpoint signaling (GO:0071174)	35	4	0.2	+	20.1	6.87e-05
regulation of mitotic nuclear division (GO:0007088)	118	6	0.67	+	8.94	7.5e-05
negative regulation of mitotic sister chromatid separation (GO:2000816)	36	4	0.2	+	19.54	7.6e-05
negative regulation of mitotic sister chromatid segregation (GO:0033048)	36	4	0.2	+	19.54	7.6e-05
negative regulation of sister chromatid segregation (GO:0033046)	36	4	0.2	+	19.54	7.6e-05
negative regulation of mitotic metaphase/anaphase transition (GO:0045841)	36	4	0.2	+	19.54	7.6e-05
regulation of chromosome separation (GO:1905818)	72	5	0.41	+	12.21	7.61e-05
4-hydroxyproline metabolic process (GO:0019471)	12	3	0.07	+	43.97	7.64e-05
spindle checkpoint signaling (GO:0031577)	37	4	0.21	+	19.01	8.39e-05
response to oxygen levels (GO:0070482)	242	8	1.38	+	5.81	9.01e-05
negative regulation of metaphase/anaphase transition of cell cycle (GO:1902100)	38	4	0.22	+	18.51	9.23e-05
negative regulation of chromosome separation (GO:1905819)	38	4	0.22	+	18.51	9.23e-05
regulation of chromosome organization (GO:0033044)	244	8	1.39	+	5.77	9.52e-05
negative regulation of chromosome segregation (GO:0051985)	40	4	0.23	+	17.59	0.000111
G2/M transition of mitotic cell cycle (GO:0000086)	40	4	0.23	+	17.59	0.000111
COPII-coated vesicle cargo loading (GO:0090110)	14	3	0.08	+	37.69	0.000113
peptidyl-proline hydroxylation (GO:0019511)	14	3	0.08	+	37.69	0.000113
regulation of chromosome segregation (GO:0051983)	129	6	0.73	+	8.18	0.00012
negative regulation of chromosome organization (GO:2001251)	83	5	0.47	+	10.59	0.000144
glucose metabolic process (GO:0006006)	134	6	0.76	+	7.87	0.000146
mitotic cell cycle checkpoint signaling (GO:0007093)	135	6	0.77	+	7.82	0.000152
NADH regeneration (GO:0006735)	16	3	0.09	+	32.97	0.00016
glucose catabolic process to pyruvate (GO:0061718)	16	3	0.09	+	32.97	0.00016
canonical glycolysis (GO:0061621)	16	3	0.09	+	32.97	0.00016
cell cycle G2/M phase transition (GO:0044839)	45	4	0.26	+	15.63	0.000169
negative regulation of mitotic nuclear division (GO:0045839)	46	4	0.26	+	15.29	0.000183
polysaccharide localization (GO:0033037)	2	2	0.01	+	> 100	0.000189
regulation of mitotic metaphase/anaphase transition (GO:0030071)	89	5	0.51	+	9.88	0.000196
positive regulation of mitotic sister chromatid separation (GO:1901970)	18	3	0.1	+	29.31	0.000218
protein N-linked glycosylation via asparagine (GO:0018279)	18	3	0.1	+	29.31	0.000218
response to stress (GO:0006950)	3310	35	18.82	+	1.86	0.000223
regulation of metaphase/anaphase transition of cell cycle (GO:1902099)	92	5	0.52	+	9.56	0.000227
protein metabolic process (GO:0019538)	3613	37	20.54	+	1.8	0.000241
glycolytic process through glucose-6-phosphate (GO:0061620)	19	3	0.11	+	27.77	0.000251
cell cycle phase transition (GO:0044770)	150	6	0.85	+	7.03	0.000264
glycolytic process (GO:0006096)	51	4	0.29	+	13.79	0.000266
regulation of nuclear division (GO:0051783)	151	6	0.86	+	6.99	0.000273
regulation of cytokinesis (GO:0032465)	96	5	0.55	+	9.16	0.000274
meiotic cell cycle process (GO:1903046)	216	7	1.23	+	5.7	0.000282
regulation of attachment of spindle microtubules to kinetochore (GO:0051988)	20	3	0.11	+	26.38	0.000288
glycolytic process through fructose-6-phosphate (GO:0061615)	21	3	0.12	+	25.12	0.000327
NAD catabolic process (GO:0019677)	21	3	0.12	+	25.12	0.000327
response to endoplasmic reticulum stress (GO:0034976)	222	7	1.26	+	5.55	0.000331
ADP catabolic process (GO:0046032)	55	4	0.31	+	12.79	0.000349
negative regulation of nuclear division (GO:0051784)	55	4	0.31	+	12.79	0.000349
positive regulation of apoptotic process (GO:0043065)	645	12	3.67	+	3.27	0.000355
glycogen biosynthetic process (GO:0005978)	22	3	0.13	+	23.98	0.000371
glucan biosynthetic process (GO:0009250)	22	3	0.13	+	23.98	0.000371
carbohydrate derivative biosynthetic process (GO:1901137)	558	11	3.17	+	3.47	0.000392
glucose catabolic process (GO:0006007)	23	3	0.13	+	22.94	0.000417
purine ribonucleoside diphosphate catabolic process (GO:0009181)	58	4	0.33	+	12.13	0.000422
purine nucleoside diphosphate catabolic process (GO:0009137)	58	4	0.33	+	12.13	0.000422
negative regulation of mitotic cell cycle phase transition (GO:1901991)	166	6	0.94	+	6.36	0.000444
pyridine nucleotide catabolic process (GO:0019364)	59	4	0.34	+	11.92	0.000448
ADP metabolic process (GO:0046031)	59	4	0.34	+	11.92	0.000448
nervous system process (GO:0050877)	2224	2	12.65	-	0.16	0.000449
vesicle cargo loading (GO:0035459)	24	3	0.14	+	21.98	0.000467
negative regulation of endodermal cell differentiation (GO:1903225)	4	2	0.02	+	87.93	0.000469
positive regulation of programmed cell death (GO:0043068)	668	12	3.8	+	3.16	0.000483
regulation of organelle organization (GO:0033043)	1196	17	6.8	+	2.5	0.000483
hexose metabolic process (GO:0019318)	169	6	0.96	+	6.24	0.000487
collagen metabolic process (GO:0032963)	61	4	0.35	+	11.53	0.000505
cytokinesis (GO:0000910)	111	5	0.63	+	7.92	0.000518
cell cycle checkpoint signaling (GO:0000075)	172	6	0.98	+	6.13	0.000532
ribonucleoside diphosphate catabolic process (GO:0009191)	62	4	0.35	+	11.35	0.000535
cellular component organization (GO:0016043)	5478	49	31.15	+	1.57	0.000555
purine ribonucleoside diphosphate metabolic process (GO:0009179)	63	4	0.36	+	11.17	0.000567
purine nucleoside diphosphate metabolic process (GO:0009135)	63	4	0.36	+	11.17	0.000567
pyridine-containing compound catabolic process (GO:0072526)	63	4	0.36	+	11.17	0.000567
positive regulation of cell cycle phase transition (GO:1901989)	115	5	0.65	+	7.65	0.000605
protein N-linked glycosylation (GO:0006487)	65	4	0.37	+	10.82	0.000634
nucleoside diphosphate catabolic process (GO:0009134)	65	4	0.37	+	10.82	0.000634
meiotic cell cycle (GO:0051321)	327	8	1.86	+	4.3	0.000648
dentinogenesis (GO:0097187)	5	2	0.03	+	70.35	0.000654
glycoprotein biosynthetic process (GO:0009101)	252	7	1.43	+	4.89	0.000689
carbohydrate metabolic process (GO:0005975)	415	9	2.36	+	3.81	0.000695
positive regulation of chromosome separation (GO:1905820)	28	3	0.16	+	18.84	0.000706
regulation of cellular component organization (GO:0051128)	2595	28	14.76	+	1.9	0.000756
non-membrane-bounded organelle assembly (GO:0140694)	336	8	1.91	+	4.19	0.000769
meiotic nuclear division (GO:0140013)	188	6	1.07	+	5.61	0.000835
intra-Golgi vesicle-mediated transport (GO:0006891)	30	3	0.17	+	17.59	0.00085
positive regulation of exit from mitosis (GO:0031536)	6	2	0.03	+	58.62	0.000868
monosaccharide metabolic process (GO:0005996)	191	6	1.09	+	5.52	0.000904
regulation of anatomical structure morphogenesis (GO:0022603)	932	14	5.3	+	2.64	0.000933
organelle organization (GO:0006996)	3012	31	17.13	+	1.81	0.000956
cellular aldehyde metabolic process (GO:0006081)	74	4	0.42	+	9.51	0.00101
ribonucleoside diphosphate metabolic process (GO:0009185)	75	4	0.43	+	9.38	0.00105
COPII-coated vesicle budding (GO:0090114)	33	3	0.19	+	15.99	0.0011
protein modification process (GO:0036211)	2107	24	11.98	+	2	0.0011
mitotic cytokinesis (GO:0000281)	76	4	0.43	+	9.26	0.00111
regulation of cell cycle phase transition (GO:1901987)	444	9	2.52	+	3.56	0.00111
meiosis I cell cycle process (GO:0061982)	134	5	0.76	+	6.56	0.00117
polysaccharide biosynthetic process (GO:0000271)	34	3	0.19	+	15.52	0.00119
mitotic cell cycle phase transition (GO:0044772)	136	5	0.77	+	6.47	0.00125
negative regulation of cell cycle process (GO:0010948)	280	7	1.59	+	4.4	0.00125
pyruvate metabolic process (GO:0006090)	79	4	0.45	+	8.9	0.00127
hexose catabolic process (GO:0019320)	35	3	0.2	+	15.07	0.00129
negative regulation of organelle organization (GO:0010639)	368	8	2.09	+	3.82	0.00136
organonitrogen compound metabolic process (GO:1901564)	4669	42	26.55	+	1.58	0.00138
cellular component organization or biogenesis (GO:0071840)	5691	49	32.36	+	1.51	0.00138
nucleoside diphosphate metabolic process (GO:0009132)	81	4	0.46	+	8.68	0.00138
regulation of endodermal cell differentiation (GO:1903224)	8	2	0.05	+	43.97	0.00139
female meiosis chromosome segregation (GO:0016321)	8	2	0.05	+	43.97	0.00139
microtubule cytoskeleton organization (GO:0000226)	556	10	3.16	+	3.16	0.00143
monosaccharide catabolic process (GO:0046365)	37	3	0.21	+	14.26	0.0015
positive regulation of biological process (GO:0048518)	6391	53	36.34	+	1.46	0.00152
cellular process (GO:0009987)	15465	104	87.94	+	1.18	0.00153
NADH metabolic process (GO:0006734)	38	3	0.22	+	13.88	0.00161
mitotic G2 DNA damage checkpoint signaling (GO:0007095)	40	3	0.23	+	13.19	0.00185
negative regulation of cellular process (GO:0048523)	5040	44	28.66	+	1.54	0.00187
peptidyl-proline modification (GO:0018208)	41	3	0.23	+	12.87	0.00197
collagen biosynthetic process (GO:0032964)	10	2	0.06	+	35.17	0.00202
positive regulation of ubiquitin protein ligase activity (GO:1904668)	10	2	0.06	+	35.17	0.00202
negative regulation of mitotic cell cycle (GO:0045930)	225	6	1.28	+	4.69	0.00204
purine ribonucleotide catabolic process (GO:0009154)	91	4	0.52	+	7.73	0.00209
sister chromatid cohesion (GO:0007062)	43	3	0.24	+	12.27	0.00224
glycoprotein metabolic process (GO:0009100)	312	7	1.77	+	3.95	0.00228
cardiac muscle cell myoblast differentiation (GO:0060379)	11	2	0.06	+	31.98	0.00237
positive regulation of mitotic cell cycle phase transition (GO:1901992)	95	4	0.54	+	7.4	0.00242
negative regulation of cell cycle phase transition (GO:1901988)	236	6	1.34	+	4.47	0.00257
positive regulation of mitotic nuclear division (GO:0045840)	46	3	0.26	+	11.47	0.00269
glyceraldehyde-3-phosphate biosynthetic process (GO:0046166)	12	2	0.07	+	29.31	0.00276
skeletal system development (GO:0001501)	510	9	2.9	+	3.1	0.00279
cellular senescence (GO:0090398)	47	3	0.27	+	11.23	0.00285
ribonucleotide catabolic process (GO:0009261)	100	4	0.57	+	7.03	0.0029
endomembrane system organization (GO:0010256)	514	9	2.92	+	3.08	0.00294
meiotic chromosome segregation (GO:0045132)	101	4	0.57	+	6.96	0.003
macromolecule modification (GO:0043412)	2291	24	13.03	+	1.84	0.00305
protein folding (GO:0006457)	168	5	0.96	+	5.23	0.00305
carbohydrate derivative metabolic process (GO:1901135)	946	13	5.38	+	2.42	0.00307
positive regulation of cellular process (GO:0048522)	5901	49	33.55	+	1.46	0.00315
cardioblast differentiation (GO:0010002)	13	2	0.07	+	27.06	0.00317
gluconeogenesis (GO:0006094)	49	3	0.28	+	10.77	0.00319
purine nucleotide catabolic process (GO:0006195)	103	4	0.59	+	6.83	0.00321
cytoskeleton-dependent cytokinesis (GO:0061640)	103	4	0.59	+	6.83	0.00321
positive regulation of cytokinesis (GO:0032467)	50	3	0.28	+	10.55	0.00336
microtubule-based process (GO:0007017)	848	12	4.82	+	2.49	0.00351
positive regulation of organelle organization (GO:0010638)	529	9	3.01	+	2.99	0.00354
regulation of exit from mitosis (GO:0007096)	14	2	0.08	+	25.12	0.00361
positive regulation of mitotic metaphase/anaphase transition (GO:0045842)	14	2	0.08	+	25.12	0.00361
regulation of mitotic cell cycle phase transition (GO:1901990)	340	7	1.93	+	3.62	0.00363
metabolic process (GO:0008152)	8051	62	45.78	+	1.35	0.00374
purine-containing compound catabolic process (GO:0072523)	108	4	0.61	+	6.51	0.00378
hexose biosynthetic process (GO:0019319)	53	3	0.3	+	9.95	0.00393
smooth muscle cell differentiation (GO:0051145)	53	3	0.3	+	9.95	0.00393
heart trabecula formation (GO:0060347)	15	2	0.09	+	23.45	0.00408
glycogen catabolic process (GO:0005980)	15	2	0.09	+	23.45	0.00408
positive regulation of metaphase/anaphase transition of cell cycle (GO:1902101)	15	2	0.09	+	23.45	0.00408
chondroitin sulfate biosynthetic process (GO:0030206)	15	2	0.09	+	23.45	0.00408
ossification (GO:0001503)	262	6	1.49	+	4.03	0.00423
small molecule biosynthetic process (GO:0044283)	446	8	2.54	+	3.15	0.00433
generation of precursor metabolites and energy (GO:0006091)	352	7	2	+	3.5	0.00437
organophosphate catabolic process (GO:0046434)	185	5	1.05	+	4.75	0.00454
glycogen metabolic process (GO:0005977)	56	3	0.32	+	9.42	0.00455
glucan catabolic process (GO:0009251)	16	2	0.09	+	21.98	0.00457
negative regulation of cell population proliferation (GO:0008285)	765	11	4.35	+	2.53	0.00459
mitotic G2/M transition checkpoint (GO:0044818)	57	3	0.32	+	9.26	0.00477
regulation of cell division (GO:0051302)	188	5	1.07	+	4.68	0.00485
peptidyl-amino acid modification (GO:0018193)	556	9	3.16	+	2.85	0.00486
glucan metabolic process (GO:0044042)	58	3	0.33	+	9.1	0.005
NAD metabolic process (GO:0019674)	58	3	0.33	+	9.1	0.005
mitotic sister chromatid cohesion (GO:0007064)	17	2	0.1	+	20.69	0.00509
blood vessel diameter maintenance (GO:0097746)	191	5	1.09	+	4.6	0.00518
regulation of tube diameter (GO:0035296)	191	5	1.09	+	4.6	0.00518
protein glycosylation (GO:0006486)	192	5	1.09	+	4.58	0.00529
macromolecule glycosylation (GO:0043413)	192	5	1.09	+	4.58	0.00529
regulation of tube size (GO:0035150)	192	5	1.09	+	4.58	0.00529
negative regulation of cell cycle (GO:0045786)	366	7	2.08	+	3.36	0.00536
nucleotide catabolic process (GO:0009166)	121	4	0.69	+	5.81	0.00558
negative regulation of vasoconstriction (GO:0045906)	18	2	0.1	+	19.54	0.00564
monosaccharide biosynthetic process (GO:0046364)	61	3	0.35	+	8.65	0.00572
cellular response to hydrogen peroxide (GO:0070301)	62	3	0.35	+	8.51	0.00597
Golgi organization (GO:0007030)	124	4	0.71	+	5.67	0.00606
nicotinamide nucleotide metabolic process (GO:0046496)	124	4	0.71	+	5.67	0.00606
immune response (GO:0006955)	1701	2	9.67	-	0.21	0.00614
polysaccharide catabolic process (GO:0000272)	19	2	0.11	+	18.51	0.00621
anaphase-promoting complex-dependent catabolic process (GO:0031145)	19	2	0.11	+	18.51	0.00621
glyceraldehyde-3-phosphate metabolic process (GO:0019682)	19	2	0.11	+	18.51	0.00621
smooth muscle contraction (GO:0006939)	63	3	0.36	+	8.37	0.00623
regulation of cardiac muscle cell apoptotic process (GO:0010665)	63	3	0.36	+	8.37	0.00623
pyridine nucleotide metabolic process (GO:0019362)	126	4	0.72	+	5.58	0.0064
immune system process (GO:0002376)	2468	5	14.03	-	0.36	0.00655
positive regulation of cellular component organization (GO:0051130)	1272	15	7.23	+	2.07	0.00663
chaperone-mediated protein folding (GO:0061077)	65	3	0.37	+	8.12	0.00677
negative regulation of fibroblast growth factor receptor signaling pathway (GO:0040037)	20	2	0.11	+	17.59	0.0068
positive regulation of ubiquitin-protein transferase activity (GO:0051443)	20	2	0.11	+	17.59	0.0068
nucleoside phosphate catabolic process (GO:1901292)	129	4	0.73	+	5.45	0.00693
negative regulation of biological process (GO:0048519)	5522	45	31.4	+	1.43	0.007
positive regulation of nuclear division (GO:0051785)	66	3	0.38	+	7.99	0.00705
regulation of striated muscle cell apoptotic process (GO:0010662)	66	3	0.38	+	7.99	0.00705
positive regulation of mitotic cell cycle (GO:0045931)	130	4	0.74	+	5.41	0.00711
meiosis I (GO:0007127)	132	4	0.75	+	5.33	0.00748
cellular metabolic process (GO:0044237)	6463	51	36.75	+	1.39	0.00759
energy reserve metabolic process (GO:0006112)	69	3	0.39	+	7.65	0.00792
negative regulation of G2/M transition of mitotic cell cycle (GO:0010972)	69	3	0.39	+	7.65	0.00792
pyridine-containing compound metabolic process (GO:0072524)	135	4	0.77	+	5.21	0.00807
chondroitin sulfate proteoglycan biosynthetic process (GO:0050650)	22	2	0.13	+	15.99	0.00807
regulation of ubiquitin protein ligase activity (GO:1904666)	22	2	0.13	+	15.99	0.00807
regulation of angiogenesis (GO:0045765)	303	6	1.72	+	3.48	0.00832
negative regulation of cell cycle G2/M phase transition (GO:1902750)	71	3	0.4	+	7.43	0.00854
bone development (GO:0060348)	217	5	1.23	+	4.05	0.00865
organelle assembly (GO:0070925)	837	11	4.76	+	2.31	0.00871
phasic smooth muscle contraction (GO:0014821)	23	2	0.13	+	15.29	0.00874
glycosylation (GO:0070085)	218	5	1.24	+	4.03	0.00881
vesicle budding from membrane (GO:0006900)	72	3	0.41	+	7.33	0.00886
polysaccharide metabolic process (GO:0005976)	73	3	0.42	+	7.23	0.00919
non-proteinogenic amino acid metabolic process (GO:0170041)	73	3	0.42	+	7.23	0.00919
regulation of vasculature development (GO:1901342)	310	6	1.76	+	3.4	0.00923
regulation of mitotic cell cycle (GO:0007346)	510	8	2.9	+	2.76	0.0093
hematopoietic progenitor cell differentiation (GO:0002244)	141	4	0.8	+	4.99	0.00933
G protein-coupled receptor signaling pathway (GO:0007186)	1904	3	10.83	-	0.28	0.00946
positive regulation of cell population proliferation (GO:0008284)	1058	13	6.02	+	2.16	0.00961
artery morphogenesis (GO:0048844)	75	3	0.43	+	7.03	0.00986
regulation of stem cell population maintenance (GO:2000036)	75	3	0.43	+	7.03	0.00986
positive regulation of nucleocytoplasmic transport (GO:0046824)	75	3	0.43	+	7.03	0.00986
negative regulation of stem cell population maintenance (GO:1902455)	25	2	0.14	+	14.07	0.0101
positive regulation of cardiac muscle cell apoptotic process (GO:0010666)	25	2	0.14	+	14.07	0.0101
chondroitin sulfate metabolic process (GO:0030204)	25	2	0.14	+	14.07	0.0101
response to metal ion (GO:0010038)	317	6	1.8	+	3.33	0.0102
trabecula formation (GO:0060343)	26	2	0.15	+	13.53	0.0109
positive regulation of striated muscle cell apoptotic process (GO:0010663)	26	2	0.15	+	13.53	0.0109
developmental growth (GO:0048589)	525	8	2.99	+	2.68	0.0109
positive regulation of transferase activity (GO:0051347)	421	7	2.39	+	2.92	0.011
cellular response to stimulus (GO:0051716)	6747	52	38.36	+	1.36	0.0112
regulation of protein transport (GO:0051223)	528	8	3	+	2.66	0.0113
prostaglandin production involved in inflammatory response (GO:0002539)	1	1	0.01	+	> 100	0.0113
negative regulation of centriole-centriole cohesion (GO:1903126)	1	1	0.01	+	> 100	0.0113
glucose 1-phosphate metabolic process (GO:0019255)	1	1	0.01	+	> 100	0.0113
methylglyoxal biosynthetic process (GO:0019242)	1	1	0.01	+	> 100	0.0113
metaphase/anaphase transition of meiosis I (GO:1990949)	1	1	0.01	+	> 100	0.0113
metaphase/anaphase transition of meiotic cell cycle (GO:0044785)	1	1	0.01	+	> 100	0.0113
regulation of cytokinesis, actomyosin contractile ring assembly (GO:2000431)	1	1	0.01	+	> 100	0.0113
integrin biosynthetic process (GO:0045112)	1	1	0.01	+	> 100	0.0113
stilbene metabolic process (GO:0009810)	1	1	0.01	+	> 100	0.0113
negative regulation of cardiac chamber formation (GO:1901211)	1	1	0.01	+	> 100	0.0113
regulation of cardiac chamber formation (GO:1901210)	1	1	0.01	+	> 100	0.0113
negative regulation of heart looping (GO:1901208)	1	1	0.01	+	> 100	0.0113
negative regulation of CAMKK-AMPK signaling cascade (GO:1905290)	1	1	0.01	+	> 100	0.0113
positive regulation of epithelium regeneration (GO:1905043)	1	1	0.01	+	> 100	0.0113
positive regulation of leukotriene production involved in inflammatory response (GO:0035491)	1	1	0.01	+	> 100	0.0113
regulation of leukotriene production involved in inflammatory response (GO:0035490)	1	1	0.01	+	> 100	0.0113
polysaccharide transport (GO:0015774)	1	1	0.01	+	> 100	0.0113
formaldehyde biosynthetic process (GO:0046293)	1	1	0.01	+	> 100	0.0113
stilbene catabolic process (GO:0046272)	1	1	0.01	+	> 100	0.0113
growth (GO:0040007)	530	8	3.01	+	2.65	0.0115
positive regulation of release of cytochrome c from mitochondria (GO:0090200)	27	2	0.15	+	13.03	0.0117
muscle cell cellular homeostasis (GO:0046716)	27	2	0.15	+	13.03	0.0117
primary metabolic process (GO:0044238)	6912	53	39.3	+	1.35	0.0117
regulation of body fluid levels (GO:0050878)	327	6	1.86	+	3.23	0.0117
mitotic DNA damage checkpoint signaling (GO:0044773)	81	3	0.46	+	6.51	0.0121
phosphate-containing compound metabolic process (GO:0006796)	1747	18	9.93	+	1.81	0.0125
multicellular organism development (GO:0007275)	4310	36	24.51	+	1.47	0.0128
cellular response to growth factor stimulus (GO:0071363)	435	7	2.47	+	2.83	0.0129
in utero embryonic development (GO:0001701)	543	8	3.09	+	2.59	0.0131
positive regulation of chromosome segregation (GO:0051984)	29	2	0.16	+	12.13	0.0132
positive regulation of coagulation (GO:0050820)	29	2	0.16	+	12.13	0.0132
mitotic DNA integrity checkpoint signaling (GO:0044774)	85	3	0.48	+	6.21	0.0137
negative regulation of apoptotic process (GO:0043066)	981	12	5.58	+	2.15	0.0138
ATP metabolic process (GO:0046034)	159	4	0.9	+	4.42	0.0139
negative regulation of cellular component organization (GO:0051129)	778	10	4.42	+	2.26	0.014
positive regulation of cardiac muscle cell proliferation (GO:0060045)	30	2	0.17	+	11.72	0.0141
chondrocyte development (GO:0002063)	30	2	0.17	+	11.72	0.0141
macromolecule metabolic process (GO:0043170)	5835	46	33.18	+	1.39	0.0144
centrosome cycle (GO:0007098)	87	3	0.49	+	6.06	0.0145
catabolic process (GO:0009056)	1882	19	10.7	+	1.78	0.0149
regulation of the force of heart contraction (GO:0002026)	31	2	0.18	+	11.35	0.0149
ketone biosynthetic process (GO:0042181)	31	2	0.18	+	11.35	0.0149
positive regulation of heart rate (GO:0010460)	31	2	0.18	+	11.35	0.0149
response to abiotic stimulus (GO:0009628)	1007	12	5.73	+	2.1	0.0155
response to growth factor (GO:0070848)	452	7	2.57	+	2.72	0.0156
vascular process in circulatory system (GO:0003018)	253	5	1.44	+	3.48	0.0157
connective tissue development (GO:0061448)	253	5	1.44	+	3.48	0.0157
chondroitin sulfate proteoglycan metabolic process (GO:0050654)	32	2	0.18	+	10.99	0.0158
mesenchymal cell proliferation (GO:0010463)	32	2	0.18	+	10.99	0.0158
negative regulation of programmed cell death (GO:0043069)	1011	12	5.75	+	2.09	0.0158
protein phosphorylation (GO:0006468)	679	9	3.86	+	2.33	0.0163
blood vessel morphogenesis (GO:0048514)	458	7	2.6	+	2.69	0.0166
aorta morphogenesis (GO:0035909)	33	2	0.19	+	10.66	0.0167
vascular associated smooth muscle cell differentiation (GO:0035886)	33	2	0.19	+	10.66	0.0167
response to hydrogen peroxide (GO:0042542)	92	3	0.52	+	5.73	0.0167
regulation of Rho guanyl-nucleotide exchange factor activity (GO:2001106)	2	1	0.01	+	87.93	0.0169
apelin receptor signaling pathway (GO:0060183)	2	1	0.01	+	87.93	0.0169
cellular response to redox state (GO:0071461)	2	1	0.01	+	87.93	0.0169
cellular response to cobalt ion (GO:0071279)	2	1	0.01	+	87.93	0.0169
negative regulation of smooth muscle cell-matrix adhesion (GO:2000098)	2	1	0.01	+	87.93	0.0169
regulation of heart looping (GO:1901207)	2	1	0.01	+	87.93	0.0169
olefinic compound catabolic process (GO:0120256)	2	1	0.01	+	87.93	0.0169
synaptonemal complex disassembly (GO:0070194)	2	1	0.01	+	87.93	0.0169
mitotic metaphase (GO:0000089)	2	1	0.01	+	87.93	0.0169
mitotic M phase (GO:0000087)	2	1	0.01	+	87.93	0.0169
vitamin K biosynthetic process (GO:0042371)	2	1	0.01	+	87.93	0.0169
lung smooth muscle development (GO:0061145)	2	1	0.01	+	87.93	0.0169
positive regulation of single stranded viral RNA replication via double stranded DNA intermediate (GO:0045870)	2	1	0.01	+	87.93	0.0169
muscle cell fate determination (GO:0007521)	2	1	0.01	+	87.93	0.0169
bronchus cartilage development (GO:0060532)	2	1	0.01	+	87.93	0.0169
ethanolamine transport (GO:0034229)	2	1	0.01	+	87.93	0.0169
embryo development (GO:0009790)	1241	14	7.06	+	1.98	0.0171
RNA metabolic process (GO:0016070)	1453	2	8.26	-	0.24	0.0176
vesicle-mediated transport (GO:0016192)	1251	14	7.11	+	1.97	0.0176
nuclear membrane organization (GO:0071763)	34	2	0.19	+	10.34	0.0176
blood vessel development (GO:0001568)	574	8	3.26	+	2.45	0.0177
establishment of chromosome localization (GO:0051303)	94	3	0.53	+	5.61	0.0177
protein maturation (GO:0051604)	466	7	2.65	+	2.64	0.0181
regulation of transferase activity (GO:0051338)	692	9	3.93	+	2.29	0.0182
positive regulation of cell division (GO:0051781)	95	3	0.54	+	5.55	0.0182
regulation of intracellular protein transport (GO:0033157)	173	4	0.98	+	4.07	0.0182
regulation of fibroblast growth factor receptor signaling pathway (GO:0040036)	35	2	0.2	+	10.05	0.0186
negative regulation of transforming growth factor beta receptor signaling pathway (GO:0030512)	96	3	0.55	+	5.5	0.0187
regulation of developmental process (GO:0050793)	2646	24	15.05	+	1.6	0.0189
peptidyl-serine phosphorylation (GO:0018105)	176	4	1	+	4	0.0192
phosphorus metabolic process (GO:0006793)	1769	18	10.06	+	1.79	0.0193
aromatic compound catabolic process (GO:0019439)	369	6	2.1	+	2.86	0.0199
positive regulation of collagen biosynthetic process (GO:0032967)	37	2	0.21	+	9.51	0.0205
heart trabecula morphogenesis (GO:0061384)	37	2	0.21	+	9.51	0.0205
microtubule organizing center organization (GO:0031023)	100	3	0.57	+	5.28	0.0207
chromosome localization (GO:0050000)	100	3	0.57	+	5.28	0.0207
response to inorganic substance (GO:0010035)	482	7	2.74	+	2.55	0.0213
placenta development (GO:0001890)	182	4	1.03	+	3.87	0.0214
chromosome condensation (GO:0030261)	38	2	0.22	+	9.26	0.0215
purine ribonucleoside triphosphate metabolic process (GO:0009205)	183	4	1.04	+	3.84	0.0218
response to stimulus (GO:0050896)	8811	63	50.1	+	1.26	0.0219
anatomical structure development (GO:0048856)	5507	43	31.31	+	1.37	0.0223
arachidonic acid metabolite production involved in inflammatory response (GO:0002538)	3	1	0.02	+	58.62	0.0224
regulation of cytokinetic process (GO:0032954)	3	1	0.02	+	58.62	0.0224
ureteric peristalsis (GO:0072105)	3	1	0.02	+	58.62	0.0224
positive regulation of anaphase-promoting complex-dependent catabolic process (GO:1905786)	3	1	0.02	+	58.62	0.0224
regulation of anaphase-promoting complex-dependent catabolic process (GO:1905784)	3	1	0.02	+	58.62	0.0224
UDP-glucose metabolic process (GO:0006011)	3	1	0.02	+	58.62	0.0224
metaphase (GO:0051323)	3	1	0.02	+	58.62	0.0224
intrinsic apoptotic signaling pathway in response to hypoxia (GO:1990144)	3	1	0.02	+	58.62	0.0224
response to cobalt ion (GO:0032025)	3	1	0.02	+	58.62	0.0224
positive regulation of mitochondrial ATP synthesis coupled electron transport (GO:1905448)	3	1	0.02	+	58.62	0.0224
pigment metabolic process involved in pigmentation (GO:0043474)	3	1	0.02	+	58.62	0.0224
peptidyl-glutamic acid carboxylation (GO:0017187)	3	1	0.02	+	58.62	0.0224
regulation of centriole-centriole cohesion (GO:0030997)	3	1	0.02	+	58.62	0.0224
cardiac jelly development (GO:1905072)	3	1	0.02	+	58.62	0.0224
regulation of epithelium regeneration (GO:1905041)	3	1	0.02	+	58.62	0.0224
dermatan sulfate biosynthetic process (GO:0030208)	3	1	0.02	+	58.62	0.0224
negative regulation of cholangiocyte proliferation (GO:1904055)	3	1	0.02	+	58.62	0.0224
positive regulation of G protein-coupled receptor internalization (GO:1904022)	3	1	0.02	+	58.62	0.0224
ureter smooth muscle contraction (GO:0014849)	3	1	0.02	+	58.62	0.0224
small molecule metabolic process (GO:0044281)	1581	16	8.99	+	1.78	0.0229
vasculature development (GO:0001944)	604	8	3.43	+	2.33	0.0231
peptidyl-serine modification (GO:0018209)	187	4	1.06	+	3.76	0.0233
regulation of mitotic spindle organization (GO:0060236)	40	2	0.23	+	8.79	0.0236
myoblast differentiation (GO:0045445)	40	2	0.23	+	8.79	0.0236
positive regulation of collagen metabolic process (GO:0010714)	40	2	0.23	+	8.79	0.0236
negative regulation of response to endoplasmic reticulum stress (GO:1903573)	40	2	0.23	+	8.79	0.0236
negative regulation of cellular response to growth factor stimulus (GO:0090288)	106	3	0.6	+	4.98	0.024
cartilage development (GO:0051216)	189	4	1.07	+	3.72	0.0241
ribonucleoside triphosphate metabolic process (GO:0009199)	189	4	1.07	+	3.72	0.0241
regulation of establishment of protein localization (GO:0070201)	610	8	3.47	+	2.31	0.0243
regulation of G2/M transition of mitotic cell cycle (GO:0010389)	107	3	0.61	+	4.93	0.0246
regulation of ubiquitin-protein transferase activity (GO:0051438)	41	2	0.23	+	8.58	0.0246
brown fat cell differentiation (GO:0050873)	41	2	0.23	+	8.58	0.0246
vasoconstriction (GO:0042310)	41	2	0.23	+	8.58	0.0246
positive regulation of muscle cell apoptotic process (GO:0010661)	41	2	0.23	+	8.58	0.0246
purine nucleoside triphosphate metabolic process (GO:0009144)	192	4	1.09	+	3.66	0.0253
developmental process (GO:0032502)	5880	45	33.43	+	1.35	0.0254
cell adhesion mediated by integrin (GO:0033627)	42	2	0.24	+	8.37	0.0257
retrograde vesicle-mediated transport, Golgi to endoplasmic reticulum (GO:0006890)	42	2	0.24	+	8.37	0.0257
positive regulation of heart contraction (GO:0045823)	42	2	0.24	+	8.37	0.0257
positive regulation of intracellular protein transport (GO:0090316)	109	3	0.62	+	4.84	0.0257
DNA damage checkpoint signaling (GO:0000077)	109	3	0.62	+	4.84	0.0257
positive regulation of nitrogen compound metabolic process (GO:0051173)	2999	26	17.05	+	1.52	0.0259
regulation of intracellular transport (GO:0032386)	289	5	1.64	+	3.04	0.0259
organic cyclic compound catabolic process (GO:1901361)	393	6	2.23	+	2.68	0.026
cardiac chamber development (GO:0003205)	195	4	1.11	+	3.61	0.0266
cytoskeleton organization (GO:0007010)	1201	13	6.83	+	1.9	0.0269
negative regulation of angiogenesis (GO:0016525)	111	3	0.63	+	4.75	0.0269
regulation of muscle cell apoptotic process (GO:0010660)	111	3	0.63	+	4.75	0.0269
regulation of spindle organization (GO:0090224)	44	2	0.25	+	7.99	0.0279
negative regulation of cell proliferation involved in contact inhibition (GO:0060244)	4	1	0.02	+	43.97	0.028
meiotic cell cycle phase transition (GO:0044771)	4	1	0.02	+	43.97	0.028
cholangiocyte proliferation (GO:1990705)	4	1	0.02	+	43.97	0.028
negative regulation of mitochondrial membrane permeability involved in apoptotic process (GO:1902109)	4	1	0.02	+	43.97	0.028
protein carboxylation (GO:0018214)	4	1	0.02	+	43.97	0.028
5-methylcytosine catabolic process (GO:0006211)	4	1	0.02	+	43.97	0.028
adrenomedullin receptor signaling pathway (GO:1990410)	4	1	0.02	+	43.97	0.028
positive regulation of corticotropin-releasing hormone secretion (GO:0051466)	4	1	0.02	+	43.97	0.028
female meiosis chromosome separation (GO:0051309)	4	1	0.02	+	43.97	0.028
negative regulation of DNA duplex unwinding (GO:1905463)	4	1	0.02	+	43.97	0.028
regulation of mitochondrial ATP synthesis coupled electron transport (GO:1905446)	4	1	0.02	+	43.97	0.028
phosphatidylinositol acyl-chain remodeling (GO:0036149)	4	1	0.02	+	43.97	0.028
negative regulation of hyaluronan biosynthetic process (GO:1900126)	4	1	0.02	+	43.97	0.028
negative regulation of IRE1-mediated unfolded protein response (GO:1903895)	4	1	0.02	+	43.97	0.028
5-methylcytosine metabolic process (GO:0019857)	4	1	0.02	+	43.97	0.028
epoxide metabolic process (GO:0097176)	4	1	0.02	+	43.97	0.028
positive regulation of protein folding (GO:1903334)	4	1	0.02	+	43.97	0.028
mammary placode formation (GO:0060596)	4	1	0.02	+	43.97	0.028
negative regulation of blood vessel morphogenesis (GO:2000181)	113	3	0.64	+	4.67	0.0282
artery development (GO:0060840)	113	3	0.64	+	4.67	0.0282
embryonic placenta development (GO:0001892)	114	3	0.65	+	4.63	0.0288
negative regulation of vasculature development (GO:1901343)	114	3	0.65	+	4.63	0.0288
phosphorylation (GO:0016310)	833	10	4.74	+	2.11	0.029
female meiotic nuclear division (GO:0007143)	45	2	0.26	+	7.82	0.0291
muscle contraction (GO:0006936)	201	4	1.14	+	3.5	0.0292
negative regulation of signaling (GO:0023057)	1477	15	8.4	+	1.79	0.0293
positive regulation of protein ubiquitination (GO:0031398)	115	3	0.65	+	4.59	0.0294
negative regulation of cell communication (GO:0010648)	1480	15	8.42	+	1.78	0.0296
chordate embryonic development (GO:0043009)	842	10	4.79	+	2.09	0.0301
glycosaminoglycan biosynthetic process (GO:0006024)	46	2	0.26	+	7.65	0.0302
positive regulation of blood circulation (GO:1903524)	46	2	0.26	+	7.65	0.0302
embryonic organ development (GO:0048568)	520	7	2.96	+	2.37	0.0303
regulation of cellular process (GO:0050794)	11558	78	65.72	+	1.19	0.0309
regulation of cell cycle checkpoint (GO:1901976)	47	2	0.27	+	7.48	0.0314
DNA integrity checkpoint signaling (GO:0031570)	118	3	0.67	+	4.47	0.0314
nucleoside triphosphate metabolic process (GO:0009141)	206	4	1.17	+	3.41	0.0315
coagulation (GO:0050817)	119	3	0.68	+	4.43	0.032
regeneration (GO:0031099)	119	3	0.68	+	4.43	0.032
blood coagulation (GO:0007596)	119	3	0.68	+	4.43	0.032
embryo development ending in birth or egg hatching (GO:0009792)	859	10	4.88	+	2.05	0.0323
positive regulation of cardiac muscle tissue growth (GO:0055023)	48	2	0.27	+	7.33	0.0326
regulation of cell cycle G2/M phase transition (GO:1902749)	120	3	0.68	+	4.4	0.0327
positive regulation of metabolic process (GO:0009893)	3808	31	21.65	+	1.43	0.0327
negative regulation of receptor recycling (GO:0001920)	5	1	0.03	+	35.17	0.0335
epigenetic programing of male pronucleus (GO:0044727)	5	1	0.03	+	35.17	0.0335
regulation of smooth muscle cell-matrix adhesion (GO:2000097)	5	1	0.03	+	35.17	0.0335
peptidyl-lysine oxidation (GO:0018057)	5	1	0.03	+	35.17	0.0335
mitotic cell cycle phase (GO:0098763)	5	1	0.03	+	35.17	0.0335
dermatan sulfate proteoglycan biosynthetic process (GO:0050651)	5	1	0.03	+	35.17	0.0335
de novo centriole assembly involved in multi-ciliated epithelial cell differentiation (GO:0098535)	5	1	0.03	+	35.17	0.0335
regulation of corticotropin-releasing hormone secretion (GO:0043397)	5	1	0.03	+	35.17	0.0335
regulation of CAMKK-AMPK signaling cascade (GO:1905289)	5	1	0.03	+	35.17	0.0335
atrioventricular canal morphogenesis (GO:1905222)	5	1	0.03	+	35.17	0.0335
parkin-mediated stimulation of mitophagy in response to mitochondrial depolarization (GO:0061734)	5	1	0.03	+	35.17	0.0335
mesenchymal cell proliferation involved in lung development (GO:0060916)	5	1	0.03	+	35.17	0.0335
melanocyte proliferation (GO:0097325)	5	1	0.03	+	35.17	0.0335
regulation of G protein-coupled receptor internalization (GO:1904020)	5	1	0.03	+	35.17	0.0335
intestine smooth muscle contraction (GO:0014827)	5	1	0.03	+	35.17	0.0335
negative regulation of vascular wound healing (GO:0061044)	5	1	0.03	+	35.17	0.0335
formaldehyde metabolic process (GO:0046292)	5	1	0.03	+	35.17	0.0335
regulation of cardiac muscle cell proliferation (GO:0060043)	49	2	0.28	+	7.18	0.0338
regulation of release of cytochrome c from mitochondria (GO:0090199)	49	2	0.28	+	7.18	0.0338
carbohydrate derivative catabolic process (GO:1901136)	211	4	1.2	+	3.33	0.0339
hemostasis (GO:0007599)	122	3	0.69	+	4.32	0.0341
intracellular protein transport (GO:0006886)	534	7	3.04	+	2.31	0.0342
nuclear envelope organization (GO:0006998)	50	2	0.28	+	7.03	0.035
mitotic metaphase chromosome alignment (GO:0007080)	50	2	0.28	+	7.03	0.035
organonitrogen compound catabolic process (GO:1901565)	1094	12	6.22	+	1.93	0.0351
animal organ development (GO:0048513)	2942	25	16.73	+	1.49	0.0352
sexual reproduction (GO:0019953)	1107	12	6.29	+	1.91	0.0362
positive regulation of heart growth (GO:0060421)	51	2	0.29	+	6.9	0.0362
axon extension (GO:0048675)	51	2	0.29	+	6.9	0.0362
regulation of neuron apoptotic process (GO:0043523)	318	5	1.81	+	2.77	0.0367
regulation of fibroblast proliferation (GO:0048145)	126	3	0.72	+	4.19	0.0369
regulation of circadian rhythm (GO:0042752)	126	3	0.72	+	4.19	0.0369
regulation of macroautophagy (GO:0016241)	126	3	0.72	+	4.19	0.0369
cellular response to reactive oxygen species (GO:0034614)	126	3	0.72	+	4.19	0.0369
negative regulation of signal transduction (GO:0009968)	1355	14	7.7	+	1.82	0.0371
nitrogen compound metabolic process (GO:0006807)	6351	47	36.11	+	1.3	0.0375
trabecula morphogenesis (GO:0061383)	52	2	0.3	+	6.76	0.0375
regulation of phosphorylation (GO:0042325)	1123	12	6.39	+	1.88	0.0377
organic substance metabolic process (GO:0071704)	7637	55	43.43	+	1.27	0.0378
regulation of biological process (GO:0050789)	12183	81	69.28	+	1.17	0.0378
positive regulation of phosphorylation (GO:0042327)	728	9	4.14	+	2.17	0.0384
positive regulation of developmental growth (GO:0048639)	220	4	1.25	+	3.2	0.0385
cell adhesion (GO:0007155)	899	10	5.11	+	1.96	0.0387
embryonic cranial skeleton morphogenesis (GO:0048701)	53	2	0.3	+	6.64	0.0388
aminoglycan biosynthetic process (GO:0006023)	53	2	0.3	+	6.64	0.0388
positive regulation of protein import into nucleus (GO:0042307)	53	2	0.3	+	6.64	0.0388
spermatid nucleus elongation (GO:0007290)	6	1	0.03	+	29.31	0.0389
B-1 B cell homeostasis (GO:0001922)	6	1	0.03	+	29.31	0.0389
cellular response to magnesium ion (GO:0071286)	6	1	0.03	+	29.31	0.0389
negative regulation of DNA methylation-dependent heterochromatin formation (GO:0090310)	6	1	0.03	+	29.31	0.0389
regulation of Rab protein signal transduction (GO:0032483)	6	1	0.03	+	29.31	0.0389
purine ribonucleoside salvage (GO:0006166)	6	1	0.03	+	29.31	0.0389
Golgi disassembly (GO:0090166)	6	1	0.03	+	29.31	0.0389
tendon development (GO:0035989)	6	1	0.03	+	29.31	0.0389
cardiolipin acyl-chain remodeling (GO:0035965)	6	1	0.03	+	29.31	0.0389
regulation of DNA duplex unwinding (GO:1905462)	6	1	0.03	+	29.31	0.0389
extracellular matrix constituent secretion (GO:0070278)	6	1	0.03	+	29.31	0.0389
nuclear membrane disassembly (GO:0051081)	6	1	0.03	+	29.31	0.0389
mitochondrial protein catabolic process (GO:0035694)	6	1	0.03	+	29.31	0.0389
de novo centriole assembly (GO:0097742)	6	1	0.03	+	29.31	0.0389
fat-soluble vitamin biosynthetic process (GO:0042362)	6	1	0.03	+	29.31	0.0389
apoptotic chromosome condensation (GO:0030263)	6	1	0.03	+	29.31	0.0389
establishment of localization in cell (GO:0051649)	1667	16	9.48	+	1.69	0.0399
morphogenesis of an epithelial sheet (GO:0002011)	54	2	0.31	+	6.51	0.0401
regulation of cellular response to growth factor stimulus (GO:0090287)	326	5	1.85	+	2.7	0.0401
defense response to Gram-negative bacterium (GO:0050829)	131	3	0.74	+	4.03	0.0405
regulation of blood pressure (GO:0008217)	225	4	1.28	+	3.13	0.0412
regulation of collagen biosynthetic process (GO:0032965)	55	2	0.31	+	6.4	0.0414
regulation of nucleocytoplasmic transport (GO:0046822)	133	3	0.76	+	3.97	0.0421
regulation of cell-substrate adhesion (GO:0010810)	227	4	1.29	+	3.1	0.0423
regulation of neural precursor cell proliferation (GO:2000177)	134	3	0.76	+	3.94	0.0428
lung development (GO:0030324)	228	4	1.3	+	3.09	0.0429
proteoglycan biosynthetic process (GO:0030166)	57	2	0.32	+	6.17	0.044
positive regulation of catalytic activity (GO:0043085)	926	10	5.27	+	1.9	0.0441
multi-ciliated epithelial cell differentiation (GO:1903251)	7	1	0.04	+	25.12	0.0444
adenylate cyclase-inhibiting serotonin receptor signaling pathway (GO:0007198)	7	1	0.04	+	25.12	0.0444
negative regulation of hepatocyte proliferation (GO:2000346)	7	1	0.04	+	25.12	0.0444
regulation protein catabolic process at postsynapse (GO:0140252)	7	1	0.04	+	25.12	0.0444
intracellular oxygen homeostasis (GO:0032364)	7	1	0.04	+	25.12	0.0444
positive regulation of odontoblast differentiation (GO:1901331)	7	1	0.04	+	25.12	0.0444
meiotic chromosome separation (GO:0051307)	7	1	0.04	+	25.12	0.0444
centrosome separation (GO:0051299)	7	1	0.04	+	25.12	0.0444
positive regulation of trophoblast cell migration (GO:1901165)	7	1	0.04	+	25.12	0.0444
methylglyoxal metabolic process (GO:0009438)	7	1	0.04	+	25.12	0.0444
autophagic cell death (GO:0048102)	7	1	0.04	+	25.12	0.0444
double-strand break repair via alternative nonhomologous end joining (GO:0097681)	7	1	0.04	+	25.12	0.0444
positive regulation of mitotic sister chromatid segregation (GO:0062033)	7	1	0.04	+	25.12	0.0444
membrane disassembly (GO:0030397)	7	1	0.04	+	25.12	0.0444
regulation of cholangiocyte proliferation (GO:1904054)	7	1	0.04	+	25.12	0.0444
gastro-intestinal system smooth muscle contraction (GO:0014831)	7	1	0.04	+	25.12	0.0444
respiratory tube development (GO:0030323)	231	4	1.31	+	3.05	0.0446
positive regulation of miRNA transcription (GO:1902895)	58	2	0.33	+	6.06	0.0454
regulation of immune response (GO:0050776)	971	1	5.52	-	0.18	0.0462
blastocyst formation (GO:0001825)	59	2	0.34	+	5.96	0.0467
fibroblast growth factor receptor signaling pathway (GO:0008543)	59	2	0.34	+	5.96	0.0467
platelet activation (GO:0030168)	59	2	0.34	+	5.96	0.0467
blood circulation (GO:0008015)	454	6	2.58	+	2.32	0.0468
nucleus organization (GO:0006997)	139	3	0.79	+	3.8	0.0468
signal transduction in response to DNA damage (GO:0042770)	139	3	0.79	+	3.8	0.0468
positive regulation of cell-substrate adhesion (GO:0010811)	139	3	0.79	+	3.8	0.0468
positive regulation of cellular metabolic process (GO:0031325)	3427	28	19.49	+	1.44	0.0469
sprouting angiogenesis (GO:0002040)	60	2	0.34	+	5.86	0.0481
response to ionizing radiation (GO:0010212)	141	3	0.8	+	3.74	0.0484
positive regulation of macromolecule metabolic process (GO:0010604)	3461	28	19.68	+	1.42	0.0485
cell-cell adhesion (GO:0098609)	459	6	2.61	+	2.3	0.0488
regulation of transforming growth factor beta receptor signaling pathway (GO:0017015)	142	3	0.81	+	3.72	0.0492
positive regulation of protein modification by small protein conjugation or removal (GO:1903322)	142	3	0.81	+	3.72	0.0492
cellular nitrogen compound catabolic process (GO:0044270)	346	5	1.97	+	2.54	0.0493
labyrinthine layer development (GO:0060711)	61	2	0.35	+	5.77	0.0495
positive regulation of transcription by glucose (GO:0046016)	8	1	0.05	+	21.98	0.0498
contact inhibition (GO:0060242)	8	1	0.05	+	21.98	0.0498
inner cell mass cell differentiation (GO:0001826)	8	1	0.05	+	21.98	0.0498
sphingomyelin catabolic process (GO:0006685)	8	1	0.05	+	21.98	0.0498
positive regulation of attachment of mitotic spindle microtubules to kinetochore (GO:1902425)	8	1	0.05	+	21.98	0.0498
metaphase/anaphase transition of cell cycle (GO:0044784)	8	1	0.05	+	21.98	0.0498
positive regulation of ceramide biosynthetic process (GO:2000304)	8	1	0.05	+	21.98	0.0498
DNA ligation (GO:0006266)	8	1	0.05	+	21.98	0.0498
DNA topological change (GO:0006265)	8	1	0.05	+	21.98	0.0498
establishment of Golgi localization (GO:0051683)	8	1	0.05	+	21.98	0.0498
polar body extrusion after meiotic divisions (GO:0040038)	8	1	0.05	+	21.98	0.0498
positive regulation of corticotropin secretion (GO:0051461)	8	1	0.05	+	21.98	0.0498
positive regulation of sphingolipid biosynthetic process (GO:0090154)	8	1	0.05	+	21.98	0.0498
negative regulation of heterochromatin organization (GO:0120262)	8	1	0.05	+	21.98	0.0498
dorsal aorta morphogenesis (GO:0035912)	8	1	0.05	+	21.98	0.0498
negative regulation of morphogenesis of an epithelium (GO:1905331)	8	1	0.05	+	21.98	0.0498
negative regulation of heterochromatin formation (GO:0031452)	8	1	0.05	+	21.98	0.0498
negative regulation of chromatin organization (GO:1905268)	8	1	0.05	+	21.98	0.0498
free ubiquitin chain polymerization (GO:0010994)	8	1	0.05	+	21.98	0.0498
calcitonin family receptor signaling pathway (GO:0097646)	8	1	0.05	+	21.98	0.0498
regulation of IRE1-mediated unfolded protein response (GO:1903894)	8	1	0.05	+	21.98	0.0498
negative regulation of plasminogen activation (GO:0010757)	8	1	0.05	+	21.98	0.0498
regulation of mitotic centrosome separation (GO:0046602)	8	1	0.05	+	21.98	0.0498
mitochondrial outer membrane permeabilization (GO:0097345)	8	1	0.05	+	21.98	0.0498
negative regulation of mitochondrial fusion (GO:0010637)	8	1	0.05	+	21.98	0.0498
positive regulation of mitotic cytokinesis (GO:1903490)	8	1	0.05	+	21.98	0.0498
positive regulation of neuroepithelial cell differentiation (GO:1902913)	8	1	0.05	+	21.98	0.0498
trachea cartilage development (GO:0060534)	8	1	0.05	+	21.98	0.0498
heterocycle catabolic process (GO:0046700)	347	5	1.97	+	2.53	0.0498

## Sheet: Supplementary File 3b
GO biological process complete	Mus musculus - REFLIST (21983)	Client Text Box Input (35)	Client Text Box Input (expected)	Client Text Box Input (over/under)	Client Text Box Input (fold Enrichment)	Client Text Box Input (raw P-value)
cell cycle (GO:0007049)	1289	18	2.05	+	8.77	1.29e-13
mitotic cell cycle (GO:0000278)	555	11	0.88	+	12.45	7.01e-10
cell cycle process (GO:0022402)	871	12	1.39	+	8.65	5.72e-09
regulation of mitotic sister chromatid segregation (GO:0033047)	57	5	0.09	+	55.1	4.57e-08
regulation of mitotic sister chromatid separation (GO:0010965)	59	5	0.09	+	53.23	5.37e-08
microtubule cytoskeleton organization involved in mitosis (GO:1902850)	129	6	0.21	+	29.21	6.66e-08
regulation of chromosome separation (GO:1905818)	72	5	0.11	+	43.62	1.37e-07
spindle organization (GO:0007051)	160	6	0.25	+	23.55	2.27e-07
mitotic spindle assembly checkpoint signaling (GO:0007094)	33	4	0.05	+	76.13	3.4e-07
spindle assembly checkpoint signaling (GO:0071173)	33	4	0.05	+	76.13	3.4e-07
regulation of mitotic metaphase/anaphase transition (GO:0030071)	89	5	0.14	+	35.29	3.74e-07
DNA replication (GO:0006260)	177	6	0.28	+	21.29	4.03e-07
mitotic spindle checkpoint signaling (GO:0071174)	35	4	0.06	+	71.78	4.23e-07
cellular component organization (GO:0016043)	5478	23	8.72	+	2.64	4.33e-07
regulation of metaphase/anaphase transition of cell cycle (GO:1902099)	92	5	0.15	+	34.14	4.37e-07
negative regulation of mitotic sister chromatid separation (GO:2000816)	36	4	0.06	+	69.79	4.69e-07
negative regulation of mitotic sister chromatid segregation (GO:0033048)	36	4	0.06	+	69.79	4.69e-07
negative regulation of sister chromatid segregation (GO:0033046)	36	4	0.06	+	69.79	4.69e-07
negative regulation of mitotic metaphase/anaphase transition (GO:0045841)	36	4	0.06	+	69.79	4.69e-07
mitotic spindle organization (GO:0007052)	94	5	0.15	+	33.41	4.84e-07
spindle checkpoint signaling (GO:0031577)	37	4	0.06	+	67.9	5.2e-07
negative regulation of metaphase/anaphase transition of cell cycle (GO:1902100)	38	4	0.06	+	66.11	5.74e-07
negative regulation of chromosome separation (GO:1905819)	38	4	0.06	+	66.11	5.74e-07
negative regulation of chromosome segregation (GO:0051985)	40	4	0.06	+	62.81	6.94e-07
DNA repair (GO:0006281)	483	8	0.77	+	10.4	8.01e-07
regulation of sister chromatid segregation (GO:0033045)	105	5	0.17	+	29.91	8.18e-07
cellular component organization or biogenesis (GO:0071840)	5691	23	9.06	+	2.54	8.98e-07
mitotic cell cycle process (GO:1903047)	491	8	0.78	+	10.23	9.04e-07
negative regulation of mitotic nuclear division (GO:0045839)	46	4	0.07	+	54.62	1.17e-06
cell division (GO:0051301)	511	8	0.81	+	9.83	1.21e-06
regulation of mitotic nuclear division (GO:0007088)	118	5	0.19	+	26.61	1.42e-06
positive regulation of attachment of spindle microtubules to kinetochore (GO:0051987)	12	3	0.02	+	> 100	1.65e-06
positive regulation of mitotic cell cycle spindle assembly checkpoint (GO:0090267)	12	3	0.02	+	> 100	1.65e-06
positive regulation of spindle checkpoint (GO:0090232)	13	3	0.02	+	> 100	2.03e-06
regulation of chromosome segregation (GO:0051983)	129	5	0.21	+	24.34	2.17e-06
microtubule cytoskeleton organization (GO:0000226)	556	8	0.89	+	9.04	2.26e-06
negative regulation of nuclear division (GO:0051784)	55	4	0.09	+	45.68	2.29e-06
regulation of chromosome organization (GO:0033044)	244	6	0.39	+	15.44	2.49e-06
positive regulation of cell cycle checkpoint (GO:1901978)	16	3	0.03	+	> 100	3.5e-06
regulation of nuclear division (GO:0051783)	151	5	0.24	+	20.8	4.58e-06
positive regulation of mitotic sister chromatid separation (GO:1901970)	18	3	0.03	+	> 100	4.8e-06
chromosome organization (GO:0051276)	435	7	0.69	+	10.11	5.18e-06
regulation of attachment of spindle microtubules to kinetochore (GO:0051988)	20	3	0.03	+	94.21	6.38e-06
regulation of mitotic cell cycle spindle assembly checkpoint (GO:0090266)	21	3	0.03	+	89.73	7.28e-06
regulation of mitotic spindle checkpoint (GO:1903504)	21	3	0.03	+	89.73	7.28e-06
mitotic cytokinesis (GO:0000281)	76	4	0.12	+	33.06	7.76e-06
regulation of spindle checkpoint (GO:0090231)	24	3	0.04	+	78.51	1.05e-05
negative regulation of chromosome organization (GO:2001251)	83	4	0.13	+	30.27	1.08e-05
DNA metabolic process (GO:0006259)	705	8	1.12	+	7.13	1.26e-05
meiotic cell cycle (GO:0051321)	327	6	0.52	+	11.52	1.28e-05
chromosome segregation (GO:0007059)	331	6	0.53	+	11.39	1.37e-05
positive regulation of chromosome separation (GO:1905820)	28	3	0.04	+	67.29	1.6e-05
positive regulation of chromosome segregation (GO:0051984)	29	3	0.05	+	64.97	1.77e-05
DNA damage response (GO:0006974)	748	8	1.19	+	6.72	1.92e-05
cytoskeleton-dependent cytokinesis (GO:0061640)	103	4	0.16	+	24.39	2.46e-05
negative regulation of organelle organization (GO:0010639)	368	6	0.59	+	10.24	2.47e-05
cytokinesis (GO:0000910)	111	4	0.18	+	22.63	3.26e-05
double-strand break repair via homologous recombination (GO:0000724)	111	4	0.18	+	22.63	3.26e-05
nuclear chromosome segregation (GO:0098813)	234	5	0.37	+	13.42	3.6e-05
regulation of cell cycle (GO:0051726)	1078	9	1.72	+	5.24	3.72e-05
recombinational repair (GO:0000725)	116	4	0.18	+	21.66	3.86e-05
DNA recombination (GO:0006310)	240	5	0.38	+	13.09	4.05e-05
microtubule-based process (GO:0007017)	848	8	1.35	+	5.93	4.67e-05
negative regulation of cellular process (GO:0048523)	5040	19	8.02	+	2.37	5.85e-05
mitotic sister chromatid segregation (GO:0000070)	131	4	0.21	+	19.18	6.11e-05
mitotic cell cycle checkpoint signaling (GO:0007093)	135	4	0.21	+	18.61	6.84e-05
sister chromatid segregation (GO:0000819)	135	4	0.21	+	18.61	6.84e-05
regulation of cell cycle checkpoint (GO:1901976)	47	3	0.07	+	40.09	6.85e-05
positive regulation of cell cycle process (GO:0090068)	272	5	0.43	+	11.55	7.24e-05
regulation of organelle organization (GO:0033043)	1196	9	1.9	+	4.73	8.28e-05
negative regulation of cell cycle process (GO:0010948)	280	5	0.45	+	11.22	8.29e-05
positive regulation of attachment of mitotic spindle microtubules to kinetochore (GO:1902425)	8	2	0.01	+	> 100	0.00011
mitotic spindle midzone assembly (GO:0051256)	8	2	0.01	+	> 100	0.00011
mitotic spindle elongation (GO:0000022)	8	2	0.01	+	> 100	0.00011
positive regulation of mitotic cytokinesis (GO:1903490)	8	2	0.01	+	> 100	0.00011
organelle organization (GO:0006996)	3012	14	4.8	+	2.92	0.000112
mitotic nuclear division (GO:0140014)	157	4	0.25	+	16	0.000121
regulation of attachment of mitotic spindle microtubules to kinetochore (GO:1902423)	9	2	0.01	+	> 100	0.000134
negative regulation of mitotic cell cycle phase transition (GO:1901991)	166	4	0.26	+	15.13	0.000149
regulation of mitotic cytokinesis (GO:1902412)	10	2	0.02	+	> 100	0.00016
spindle midzone assembly (GO:0051255)	10	2	0.02	+	> 100	0.00016
nuclear division (GO:0000280)	324	5	0.52	+	9.69	0.000162
cell cycle checkpoint signaling (GO:0000075)	172	4	0.27	+	14.61	0.00017
osteoblast proliferation (GO:0033687)	11	2	0.02	+	> 100	0.000189
spindle elongation (GO:0051231)	11	2	0.02	+	> 100	0.000189
negative regulation of cellular component organization (GO:0051129)	778	7	1.24	+	5.65	0.0002
regulation of mitotic cell cycle phase transition (GO:1901990)	340	5	0.54	+	9.24	0.000202
organelle fission (GO:0048285)	351	5	0.56	+	8.95	0.000234
positive regulation of cell cycle (GO:0045787)	355	5	0.57	+	8.85	0.000246
kinetochore assembly (GO:0051382)	13	2	0.02	+	96.63	0.000254
low-density lipoprotein particle remodeling (GO:0034374)	13	2	0.02	+	96.63	0.000254
negative regulation of biological process (GO:0048519)	5522	19	8.79	+	2.16	0.000255
negative regulation of cell cycle (GO:0045786)	366	5	0.58	+	8.58	0.000283
regulation of metaphase plate congression (GO:0090235)	14	2	0.02	+	89.73	0.00029
double-strand break repair (GO:0006302)	204	4	0.32	+	12.32	0.000322
negative regulation of response to stimulus (GO:0048585)	1781	10	2.84	+	3.53	0.000342
meiotic cell cycle process (GO:1903046)	216	4	0.34	+	11.63	0.000398
kinetochore organization (GO:0051383)	17	2	0.03	+	73.89	0.000413
protein localization to chromosome (GO:0034502)	92	3	0.15	+	20.48	0.000461
negative regulation of mitotic cell cycle (GO:0045930)	225	4	0.36	+	11.17	0.000463
establishment of chromosome localization (GO:0051303)	94	3	0.15	+	20.05	0.00049
cytoskeleton organization (GO:0007010)	1201	8	1.91	+	4.18	0.000503
spindle assembly (GO:0051225)	95	3	0.15	+	19.83	0.000505
regulation of cytokinesis (GO:0032465)	96	3	0.15	+	19.63	0.00052
negative regulation of cell cycle phase transition (GO:1901988)	236	4	0.38	+	10.65	0.000553
reproductive process (GO:0022414)	1547	9	2.46	+	3.65	0.000564
chromosome localization (GO:0050000)	100	3	0.16	+	18.84	0.000584
reproduction (GO:0000003)	1555	9	2.48	+	3.64	0.000586
mismatch repair (GO:0006298)	21	2	0.03	+	59.82	0.000608
regulation of cell cycle phase transition (GO:1901987)	444	5	0.71	+	7.07	0.000676
centromere complex assembly (GO:0034508)	23	2	0.04	+	54.62	0.00072
plasma lipoprotein particle remodeling (GO:0034369)	25	2	0.04	+	50.25	0.00084
protein-lipid complex remodeling (GO:0034368)	25	2	0.04	+	50.25	0.00084
DNA-templated DNA replication (GO:0006261)	120	3	0.19	+	15.7	0.000977
protein-containing complex remodeling (GO:0034367)	28	2	0.04	+	44.86	0.00104
regulation of cell cycle process (GO:0010564)	747	6	1.19	+	5.04	0.00109
attachment of spindle microtubules to kinetochore (GO:0008608)	29	2	0.05	+	43.32	0.00111
cellular process (GO:0009987)	15465	33	24.62	+	1.34	0.00118
regulation of mitotic cell cycle (GO:0007346)	510	5	0.81	+	6.16	0.00125
glycerophospholipid catabolic process (GO:0046475)	31	2	0.05	+	40.52	0.00126
cellular response to stimulus (GO:0051716)	6747	20	10.74	+	1.86	0.00141
sexual reproduction (GO:0019953)	1107	7	1.76	+	3.97	0.00161
regulation of cellular component organization (GO:0051128)	2595	11	4.13	+	2.66	0.00173
cytokinetic process (GO:0032506)	38	2	0.06	+	33.06	0.00184
protein-DNA complex assembly (GO:0065004)	153	3	0.24	+	12.32	0.00193
plasma lipoprotein particle organization (GO:0071827)	39	2	0.06	+	32.21	0.00194
non-membrane-bounded organelle assembly (GO:0140694)	336	4	0.53	+	7.48	0.002
protein-lipid complex organization (GO:0071825)	43	2	0.07	+	29.21	0.00233
cellular response to stress (GO:0033554)	1534	8	2.44	+	3.28	0.00243
cell cycle G2/M phase transition (GO:0044839)	45	2	0.07	+	27.91	0.00254
positive regulation of cytokinesis (GO:0032467)	50	2	0.08	+	25.12	0.0031
phospholipid catabolic process (GO:0009395)	50	2	0.08	+	25.12	0.0031
cell cycle comprising mitosis without cytokinesis (GO:0033301)	1	1	0	+	> 100	0.00318
pericentric heterochromatin organization (GO:0140462)	1	1	0	+	> 100	0.00318
lateral attachment of mitotic spindle microtubules to kinetochore (GO:0099607)	1	1	0	+	> 100	0.00318
microtubule plus-end directed mitotic chromosome migration (GO:0099606)	1	1	0	+	> 100	0.00318
positive regulation of phagosome maturation (GO:1905164)	1	1	0	+	> 100	0.00318
positive regulation of lateral attachment of mitotic spindle microtubules to kinetochore (GO:1905116)	1	1	0	+	> 100	0.00318
regulation of lateral attachment of mitotic spindle microtubules to kinetochore (GO:1905115)	1	1	0	+	> 100	0.00318
mitotic spindle assembly (GO:0090307)	51	2	0.08	+	24.63	0.00321
meiotic nuclear division (GO:0140013)	188	3	0.3	+	10.02	0.00343
regulation of cell division (GO:0051302)	188	3	0.3	+	10.02	0.00343
glycerolipid catabolic process (GO:0046503)	53	2	0.08	+	23.7	0.00346
regulation of plasma lipoprotein particle levels (GO:0097006)	53	2	0.08	+	23.7	0.00346
phosphatidylcholine metabolic process (GO:0046470)	54	2	0.09	+	23.26	0.00358
nucleic acid metabolic process (GO:0090304)	2045	9	3.26	+	2.76	0.00395
fibroblast proliferation (GO:0048144)	57	2	0.09	+	22.04	0.00397
establishment of organelle localization (GO:0051656)	428	4	0.68	+	5.87	0.00473
mitotic chromosome movement towards spindle pole (GO:0007079)	2	1	0	+	> 100	0.00476
positive regulation of DNA endoreduplication (GO:0032877)	2	1	0	+	> 100	0.00476
ossification involved in bone remodeling (GO:0043932)	2	1	0	+	> 100	0.00476
establishment of planar polarity involved in neural tube closure (GO:0090177)	2	1	0	+	> 100	0.00476
negative regulation of ERBB4 signaling pathway (GO:0120154)	2	1	0	+	> 100	0.00476
negative regulation of protein localization to nucleolus (GO:1904750)	2	1	0	+	> 100	0.00476
chylomicron remodeling (GO:0034371)	2	1	0	+	> 100	0.00476
negative regulation of signal transduction (GO:0009968)	1355	7	2.16	+	3.24	0.00497
negative regulation of cysteine-type endopeptidase activity involved in apoptotic process (GO:0043154)	66	2	0.11	+	19.03	0.00524
response to radiation (GO:0009314)	445	4	0.71	+	5.65	0.00542
DNA biosynthetic process (GO:0071897)	68	2	0.11	+	18.47	0.00554
nucleobase-containing compound metabolic process (GO:0006139)	2577	10	4.1	+	2.44	0.00565
protein-DNA complex organization (GO:0071824)	744	5	1.18	+	4.22	0.00626
organic cyclic compound metabolic process (GO:1901360)	3059	11	4.87	+	2.26	0.00632
maternal aggressive behavior (GO:0002125)	3	1	0	+	> 100	0.00634
positive regulation of immune complex clearance by monocytes and macrophages (GO:0090265)	3	1	0	+	> 100	0.00634
regulation of immune complex clearance by monocytes and macrophages (GO:0090264)	3	1	0	+	> 100	0.00634
negative regulation of thrombin-activated receptor signaling pathway (GO:0070495)	3	1	0	+	> 100	0.00634
regulation of thrombin-activated receptor signaling pathway (GO:0070494)	3	1	0	+	> 100	0.00634
regulation of phagosome maturation (GO:1905162)	3	1	0	+	> 100	0.00634
positive regulation of antifungal innate immune response (GO:1905036)	3	1	0	+	> 100	0.00634
regulation of signal transduction (GO:0009966)	3065	11	4.88	+	2.25	0.00642
metaphase chromosome alignment (GO:0051310)	78	2	0.12	+	16.1	0.00718
protein-containing complex organization (GO:0043933)	1850	8	2.95	+	2.72	0.00756
negative regulation of signaling (GO:0023057)	1477	7	2.35	+	2.98	0.0079
aorta smooth muscle tissue morphogenesis (GO:0060414)	4	1	0.01	+	> 100	0.00792
transforming growth factor beta1 production (GO:0032905)	4	1	0.01	+	> 100	0.00792
regulation of DNA endoreduplication (GO:0032875)	4	1	0.01	+	> 100	0.00792
unidimensional cell growth (GO:0009826)	4	1	0.01	+	> 100	0.00792
negative regulation of female receptivity (GO:0007621)	4	1	0.01	+	> 100	0.00792
negative regulation of cell communication (GO:0010648)	1480	7	2.36	+	2.97	0.00798
negative regulation of cysteine-type endopeptidase activity (GO:2000117)	84	2	0.13	+	14.95	0.00825
heterocycle metabolic process (GO:0046483)	2743	10	4.37	+	2.29	0.00875
regulation of signaling (GO:0023051)	3542	12	5.64	+	2.13	0.00879
regulation of cell communication (GO:0010646)	3543	12	5.64	+	2.13	0.0088
regulation of DNA metabolic process (GO:0051052)	515	4	0.82	+	4.88	0.00896
cell-cell signaling by wnt (GO:0198738)	270	3	0.43	+	6.98	0.00921
Wnt signaling pathway (GO:0016055)	270	3	0.43	+	6.98	0.00921
platelet activating factor biosynthetic process (GO:0006663)	5	1	0.01	+	> 100	0.0095
spindle assembly involved in female meiosis I (GO:0007057)	5	1	0.01	+	> 100	0.0095
positive regulation of cellular pH reduction (GO:0032849)	5	1	0.01	+	> 100	0.0095
nuclear cell cycle DNA replication initiation (GO:1902315)	5	1	0.01	+	> 100	0.0095
cell cycle DNA replication initiation (GO:1902292)	5	1	0.01	+	> 100	0.0095
retrograde trans-synaptic signaling by trans-synaptic protein complex (GO:0098942)	5	1	0.01	+	> 100	0.0095
chromosome movement towards spindle pole (GO:0051305)	5	1	0.01	+	> 100	0.0095
negative regulation of guanyl-nucleotide exchange factor activity (GO:1905098)	5	1	0.01	+	> 100	0.0095
regulation of antifungal innate immune response (GO:1905034)	5	1	0.01	+	> 100	0.0095
susceptibility to natural killer cell mediated cytotoxicity (GO:0042271)	5	1	0.01	+	> 100	0.0095
establishment of planar polarity of embryonic epithelium (GO:0042249)	5	1	0.01	+	> 100	0.0095
mitotic DNA replication initiation (GO:1902975)	5	1	0.01	+	> 100	0.0095
very-low-density lipoprotein particle remodeling (GO:0034372)	5	1	0.01	+	> 100	0.0095
regulation of Rho protein signal transduction (GO:0035023)	92	2	0.15	+	13.65	0.00979
cellular aromatic compound metabolic process (GO:0006725)	2800	10	4.46	+	2.24	0.0101
organelle assembly (GO:0070925)	837	5	1.33	+	3.75	0.0101
positive regulation of mitotic cell cycle phase transition (GO:1901992)	95	2	0.15	+	13.22	0.0104
positive regulation of cell division (GO:0051781)	95	2	0.15	+	13.22	0.0104
positive regulation of opsonization (GO:1903028)	6	1	0.01	+	> 100	0.0111
negative regulation of double-strand break repair via nonhomologous end joining (GO:2001033)	6	1	0.01	+	> 100	0.0111
DNA replication-dependent chromatin assembly (GO:0006335)	6	1	0.01	+	> 100	0.0111
premeiotic DNA replication (GO:0006279)	6	1	0.01	+	> 100	0.0111
dTMP biosynthetic process (GO:0006231)	6	1	0.01	+	> 100	0.0111
negative regulation of cytokinesis (GO:0032466)	6	1	0.01	+	> 100	0.0111
cardiolipin acyl-chain remodeling (GO:0035965)	6	1	0.01	+	> 100	0.0111
positive regulation of exit from mitosis (GO:0031536)	6	1	0.01	+	> 100	0.0111
calcium-independent cell-cell adhesion via plasma membrane cell-adhesion molecules (GO:0016338)	6	1	0.01	+	> 100	0.0111
pyrimidine deoxyribonucleoside monophosphate biosynthetic process (GO:0009177)	6	1	0.01	+	> 100	0.0111
chylomicron remnant clearance (GO:0034382)	6	1	0.01	+	> 100	0.0111
regulation of catalytic activity (GO:0050790)	1599	7	2.55	+	2.75	0.012
organelle localization (GO:0051640)	566	4	0.9	+	4.44	0.0123
triglyceride-rich lipoprotein particle clearance (GO:0071830)	7	1	0.01	+	89.73	0.0126
transforming growth factor beta production (GO:0071604)	7	1	0.01	+	89.73	0.0126
cleavage furrow formation (GO:0036089)	7	1	0.01	+	89.73	0.0126
limb joint morphogenesis (GO:0036022)	7	1	0.01	+	89.73	0.0126
positive regulation of mitotic sister chromatid segregation (GO:0062033)	7	1	0.01	+	89.73	0.0126
platelet activating factor metabolic process (GO:0046469)	7	1	0.01	+	89.73	0.0126
chorionic trophoblast cell differentiation (GO:0060718)	7	1	0.01	+	89.73	0.0126
triglyceride-rich lipoprotein particle remodeling (GO:0034370)	7	1	0.01	+	89.73	0.0126
osteoblast differentiation (GO:0001649)	110	2	0.18	+	11.42	0.0137
regulation of opsonization (GO:1903027)	8	1	0.01	+	78.51	0.0142
regulation of cellular pH reduction (GO:0032847)	8	1	0.01	+	78.51	0.0142
hepatocyte growth factor receptor signaling pathway (GO:0048012)	8	1	0.01	+	78.51	0.0142
regulation of defense response to fungus (GO:1900150)	8	1	0.01	+	78.51	0.0142
negative regulation of molecular function (GO:0044092)	912	5	1.45	+	3.44	0.0143
response to chemical (GO:0042221)	3896	1	6.2	-	0.16	0.0143
nitrogen compound metabolic process (GO:0006807)	6351	17	10.11	+	1.68	0.0145
positive regulation of cell cycle phase transition (GO:1901989)	115	2	0.18	+	10.92	0.0149
liver development (GO:0001889)	116	2	0.18	+	10.83	0.0151
spindle assembly involved in female meiosis (GO:0007056)	9	1	0.01	+	69.79	0.0158
regulation of resting membrane potential (GO:0060075)	9	1	0.01	+	69.79	0.0158
negative regulation of transmission of nerve impulse (GO:0051970)	9	1	0.01	+	69.79	0.0158
establishment of centrosome localization (GO:0051660)	9	1	0.01	+	69.79	0.0158
positive regulation of prostaglandin biosynthetic process (GO:0031394)	9	1	0.01	+	69.79	0.0158
regulation of guanyl-nucleotide exchange factor activity (GO:1905097)	9	1	0.01	+	69.79	0.0158
lymphocyte migration into lymphoid organs (GO:0097021)	9	1	0.01	+	69.79	0.0158
hepaticobiliary system development (GO:0061008)	119	2	0.19	+	10.56	0.0158
negative regulation of protein metabolic process (GO:0051248)	958	5	1.53	+	3.28	0.0173
retrograde trans-synaptic signaling (GO:0098917)	10	1	0.02	+	62.81	0.0174
hepatocyte differentiation (GO:0070365)	10	1	0.02	+	62.81	0.0174
regulation of protein localization to nucleolus (GO:1904749)	10	1	0.02	+	62.81	0.0174
negative regulation of ubiquitin protein ligase activity (GO:1904667)	10	1	0.02	+	62.81	0.0174
pyrimidine deoxyribonucleotide biosynthetic process (GO:0009221)	10	1	0.02	+	62.81	0.0174
deoxyribonucleoside monophosphate biosynthetic process (GO:0009157)	10	1	0.02	+	62.81	0.0174
regulation of protein modification process (GO:0031399)	1347	6	2.14	+	2.8	0.0186
regulation of double-strand break repair (GO:2000779)	130	2	0.21	+	9.66	0.0187
positive regulation of mitotic cell cycle (GO:0045931)	130	2	0.21	+	9.66	0.0187
positive regulation of unsaturated fatty acid biosynthetic process (GO:2001280)	11	1	0.02	+	57.1	0.0189
aggressive behavior (GO:0002118)	11	1	0.02	+	57.1	0.0189
trans-synaptic signaling by trans-synaptic complex (GO:0099545)	11	1	0.02	+	57.1	0.0189
maintenance of postsynaptic specialization structure (GO:0098880)	11	1	0.02	+	57.1	0.0189
elastic fiber assembly (GO:0048251)	11	1	0.02	+	57.1	0.0189
ether lipid biosynthetic process (GO:0008611)	11	1	0.02	+	57.1	0.0189
glycerol ether biosynthetic process (GO:0046504)	11	1	0.02	+	57.1	0.0189
chorion development (GO:0060717)	11	1	0.02	+	57.1	0.0189
regulation of female receptivity (GO:0045924)	11	1	0.02	+	57.1	0.0189
low-density lipoprotein particle clearance (GO:0034383)	11	1	0.02	+	57.1	0.0189
negative regulation of apoptotic process (GO:0043066)	981	5	1.56	+	3.2	0.019
regulation of binding (GO:0051098)	355	3	0.57	+	5.31	0.019
regulation of intracellular signal transduction (GO:1902531)	1754	7	2.79	+	2.51	0.0191
meiosis I (GO:0007127)	132	2	0.21	+	9.52	0.0192
meiosis I cell cycle process (GO:0061982)	134	2	0.21	+	9.37	0.0197
leukotriene biosynthetic process (GO:0019370)	12	1	0.02	+	52.34	0.0205
negative regulation of neuron migration (GO:2001223)	12	1	0.02	+	52.34	0.0205
phagosome-lysosome fusion (GO:0090385)	12	1	0.02	+	52.34	0.0205
ether biosynthetic process (GO:1901503)	12	1	0.02	+	52.34	0.0205
double-strand break repair via break-induced replication (GO:0000727)	12	1	0.02	+	52.34	0.0205
protein localization to site of double-strand break (GO:1990166)	12	1	0.02	+	52.34	0.0205
regulation of prostaglandin biosynthetic process (GO:0031392)	12	1	0.02	+	52.34	0.0205
cellular lipid biosynthetic process (GO:0097384)	12	1	0.02	+	52.34	0.0205
phosphatidylcholine catabolic process (GO:0034638)	12	1	0.02	+	52.34	0.0205
negative regulation of canonical Wnt signaling pathway (GO:0090090)	137	2	0.22	+	9.17	0.0205
cell growth (GO:0016049)	139	2	0.22	+	9.04	0.0211
negative regulation of programmed cell death (GO:0043069)	1011	5	1.61	+	3.11	0.0213
dTMP metabolic process (GO:0046073)	13	1	0.02	+	48.31	0.022
protein localization to condensed chromosome (GO:1903083)	13	1	0.02	+	48.31	0.022
DNA strand elongation involved in DNA replication (GO:0006271)	13	1	0.02	+	48.31	0.022
meiotic spindle assembly (GO:0090306)	13	1	0.02	+	48.31	0.022
tetrahydrofolate interconversion (GO:0035999)	13	1	0.02	+	48.31	0.022
regulation of GTP binding (GO:1904424)	13	1	0.02	+	48.31	0.022
protein localization to kinetochore (GO:0034501)	13	1	0.02	+	48.31	0.022
positive regulation of protein phosphorylation (GO:0001934)	679	4	1.08	+	3.7	0.0224
response to stimulus (GO:0050896)	8811	21	14.03	+	1.5	0.0234
regulation of protein phosphorylation (GO:0001932)	1038	5	1.65	+	3.03	0.0236
regulation of unsaturated fatty acid biosynthetic process (GO:2001279)	14	1	0.02	+	44.86	0.0236
female meiosis I (GO:0007144)	14	1	0.02	+	44.86	0.0236
female mating behavior (GO:0060180)	14	1	0.02	+	44.86	0.0236
regulation of exit from mitosis (GO:0007096)	14	1	0.02	+	44.86	0.0236
negative regulation of cGAS/STING signaling pathway (GO:0160049)	14	1	0.02	+	44.86	0.0236
positive regulation of DNA-templated DNA replication (GO:2000105)	14	1	0.02	+	44.86	0.0236
attachment of mitotic spindle microtubules to kinetochore (GO:0051315)	14	1	0.02	+	44.86	0.0236
cardiolipin metabolic process (GO:0032048)	14	1	0.02	+	44.86	0.0236
pyrimidine nucleoside monophosphate biosynthetic process (GO:0009130)	14	1	0.02	+	44.86	0.0236
extraembryonic membrane development (GO:1903867)	14	1	0.02	+	44.86	0.0236
mitotic DNA replication (GO:1902969)	14	1	0.02	+	44.86	0.0236
positive regulation of mitotic metaphase/anaphase transition (GO:0045842)	14	1	0.02	+	44.86	0.0236
cellular metabolic process (GO:0044237)	6463	17	10.29	+	1.65	0.024
cell cycle phase transition (GO:0044770)	150	2	0.24	+	8.37	0.0243
regulation of response to stress (GO:0080134)	1433	6	2.28	+	2.63	0.0245
regulation of molecular function (GO:0065009)	2286	8	3.64	+	2.2	0.0249
cellular nitrogen compound metabolic process (GO:0034641)	3108	10	4.95	+	2.02	0.0249
negative regulation of nitrogen compound metabolic process (GO:0051172)	2288	8	3.64	+	2.2	0.025
positive regulation of osteoblast proliferation (GO:0033690)	15	1	0.02	+	41.87	0.0251
signal peptide processing (GO:0006465)	15	1	0.02	+	41.87	0.0251
positive regulation of glutamate secretion (GO:0014049)	15	1	0.02	+	41.87	0.0251
positive regulation of metaphase/anaphase transition of cell cycle (GO:1902101)	15	1	0.02	+	41.87	0.0251
negative regulation of cell division (GO:0051782)	15	1	0.02	+	41.87	0.0251
somatic hypermutation of immunoglobulin genes (GO:0016446)	15	1	0.02	+	41.87	0.0251
negative regulation of microtubule polymerization (GO:0031115)	15	1	0.02	+	41.87	0.0251
positive regulation of macrophage derived foam cell differentiation (GO:0010744)	15	1	0.02	+	41.87	0.0251
high-density lipoprotein particle remodeling (GO:0034375)	15	1	0.02	+	41.87	0.0251
positive regulation of binding (GO:0051099)	156	2	0.25	+	8.05	0.0261
triglyceride catabolic process (GO:0019433)	16	1	0.03	+	39.26	0.0267
somatic diversification of immune receptors via somatic mutation (GO:0002566)	16	1	0.03	+	39.26	0.0267
telomere maintenance via telomerase (GO:0007004)	16	1	0.03	+	39.26	0.0267
RNA-templated DNA biosynthetic process (GO:0006278)	16	1	0.03	+	39.26	0.0267
negative regulation of axon regeneration (GO:0048681)	16	1	0.03	+	39.26	0.0267
midbody abscission (GO:0061952)	16	1	0.03	+	39.26	0.0267
pyrimidine deoxyribonucleoside monophosphate metabolic process (GO:0009176)	16	1	0.03	+	39.26	0.0267
stabilization of membrane potential (GO:0030322)	16	1	0.03	+	39.26	0.0267
layer formation in cerebral cortex (GO:0021819)	16	1	0.03	+	39.26	0.0267
regulation of response to stimulus (GO:0048583)	4094	12	6.52	+	1.84	0.0272
response to UV (GO:0009411)	160	2	0.25	+	7.85	0.0273
developmental growth involved in morphogenesis (GO:0060560)	162	2	0.26	+	7.75	0.0279
positive regulation of phosphorylation (GO:0042327)	728	4	1.16	+	3.45	0.028
positive regulation of intracellular signal transduction (GO:1902533)	1088	5	1.73	+	2.89	0.0281
phagolysosome assembly (GO:0001845)	17	1	0.03	+	36.95	0.0282
2'-deoxyribonucleotide biosynthetic process (GO:0009265)	17	1	0.03	+	36.95	0.0282
deoxyribonucleotide biosynthetic process (GO:0009263)	17	1	0.03	+	36.95	0.0282
positive regulation of telomere capping (GO:1904355)	17	1	0.03	+	36.95	0.0282
negative regulation of B cell apoptotic process (GO:0002903)	17	1	0.03	+	36.95	0.0282
deoxyribose phosphate biosynthetic process (GO:0046385)	17	1	0.03	+	36.95	0.0282
cellular component assembly (GO:0022607)	2342	8	3.73	+	2.15	0.0283
negative regulation of ubiquitin-protein transferase activity (GO:0051444)	18	1	0.03	+	34.89	0.0298
maternal behavior (GO:0042711)	18	1	0.03	+	34.89	0.0298
regulation of type B pancreatic cell proliferation (GO:0061469)	18	1	0.03	+	34.89	0.0298
DNA strand elongation (GO:0022616)	18	1	0.03	+	34.89	0.0298
grooming behavior (GO:0007625)	18	1	0.03	+	34.89	0.0298
negative regulation of Wnt signaling pathway (GO:0030178)	169	2	0.27	+	7.43	0.0302
protein kinase C signaling (GO:0070528)	19	1	0.03	+	33.06	0.0313
trophoblast giant cell differentiation (GO:0060707)	19	1	0.03	+	33.06	0.0313
regulation of phosphorylation (GO:0042325)	1123	5	1.79	+	2.8	0.0317
negative regulation of endopeptidase activity (GO:0010951)	174	2	0.28	+	7.22	0.0318
protein localization to organelle (GO:0033365)	762	4	1.21	+	3.3	0.0324
glycerol ether metabolic process (GO:0006662)	20	1	0.03	+	31.4	0.0329
phosphatidylserine metabolic process (GO:0006658)	20	1	0.03	+	31.4	0.0329
DNA unwinding involved in DNA replication (GO:0006268)	20	1	0.03	+	31.4	0.0329
presynapse assembly (GO:0099054)	20	1	0.03	+	31.4	0.0329
tetrahydrofolate metabolic process (GO:0046653)	20	1	0.03	+	31.4	0.0329
ether lipid metabolic process (GO:0046485)	20	1	0.03	+	31.4	0.0329
parental behavior (GO:0060746)	20	1	0.03	+	31.4	0.0329
negative regulation of macromolecule metabolic process (GO:0010605)	2733	9	4.35	+	2.07	0.034
protein localization to chromosome, centromeric region (GO:0071459)	21	1	0.03	+	29.91	0.0344
negative regulation of neuron projection regeneration (GO:0070571)	21	1	0.03	+	29.91	0.0344
pyrimidine deoxyribonucleotide metabolic process (GO:0009219)	21	1	0.03	+	29.91	0.0344
plasma lipoprotein particle clearance (GO:0034381)	21	1	0.03	+	29.91	0.0344
cellular localization (GO:0051641)	2747	9	4.37	+	2.06	0.0345
macromolecule metabolic process (GO:0043170)	5835	15	9.29	+	1.61	0.0351
cellular response to radiation (GO:0071478)	185	2	0.29	+	6.79	0.0355
regulation of cysteine-type endopeptidase activity involved in apoptotic process (GO:0043281)	185	2	0.29	+	6.79	0.0355
organophosphate catabolic process (GO:0046434)	185	2	0.29	+	6.79	0.0355
negative regulation of release of cytochrome c from mitochondria (GO:0090201)	22	1	0.04	+	28.55	0.0359
meiotic spindle organization (GO:0000212)	22	1	0.04	+	28.55	0.0359
regulation of ubiquitin protein ligase activity (GO:1904666)	22	1	0.04	+	28.55	0.0359
pyrimidine nucleoside monophosphate metabolic process (GO:0009129)	22	1	0.04	+	28.55	0.0359
translesion synthesis (GO:0019985)	22	1	0.04	+	28.55	0.0359
cellular modified amino acid metabolic process (GO:0006575)	188	2	0.3	+	6.68	0.0366
negative regulation of response to external stimulus (GO:0032102)	463	3	0.74	+	4.07	0.0374
leukotriene metabolic process (GO:0006691)	23	1	0.04	+	27.31	0.0375
mitotic cytokinetic process (GO:1902410)	23	1	0.04	+	27.31	0.0375
telomere maintenance via telomere lengthening (GO:0010833)	23	1	0.04	+	27.31	0.0375
regulation of protein binding (GO:0043393)	193	2	0.31	+	6.51	0.0384
ether metabolic process (GO:0018904)	24	1	0.04	+	26.17	0.039
nuclear DNA replication (GO:0033260)	24	1	0.04	+	26.17	0.039
DNA replication initiation (GO:0006270)	24	1	0.04	+	26.17	0.039
negative regulation of nervous system process (GO:0031645)	24	1	0.04	+	26.17	0.039
regulation of B cell apoptotic process (GO:0002902)	24	1	0.04	+	26.17	0.039
cellular lipid catabolic process (GO:0044242)	197	2	0.31	+	6.38	0.0398
folic acid-containing compound metabolic process (GO:0006760)	25	1	0.04	+	25.12	0.0405
microtubule depolymerization (GO:0007019)	25	1	0.04	+	25.12	0.0405
cell cycle DNA replication (GO:0044786)	25	1	0.04	+	25.12	0.0405
arachidonic acid secretion (GO:0050482)	25	1	0.04	+	25.12	0.0405
arachidonate transport (GO:1903963)	25	1	0.04	+	25.12	0.0405
regulation of macrophage derived foam cell differentiation (GO:0010743)	25	1	0.04	+	25.12	0.0405
negative regulation of Rho protein signal transduction (GO:0035024)	25	1	0.04	+	25.12	0.0405
phosphatidic acid metabolic process (GO:0046473)	25	1	0.04	+	25.12	0.0405
phosphatidylethanolamine metabolic process (GO:0046337)	25	1	0.04	+	25.12	0.0405
positive regulation of phosphorus metabolic process (GO:0010562)	821	4	1.31	+	3.06	0.0408
positive regulation of phosphate metabolic process (GO:0045937)	821	4	1.31	+	3.06	0.0408
regulation of innate immune response (GO:0045088)	482	3	0.77	+	3.91	0.0413
positive regulation of systemic arterial blood pressure (GO:0003084)	26	1	0.04	+	24.16	0.0421
regulation of glutamate secretion (GO:0014048)	26	1	0.04	+	24.16	0.0421
pyrimidine nucleotide biosynthetic process (GO:0006221)	26	1	0.04	+	24.16	0.0421
smooth muscle tissue development (GO:0048745)	26	1	0.04	+	24.16	0.0421
multicellular organismal-level water homeostasis (GO:0050891)	26	1	0.04	+	24.16	0.0421
presynapse organization (GO:0099172)	26	1	0.04	+	24.16	0.0421
regulation of telomere capping (GO:1904353)	26	1	0.04	+	24.16	0.0421
phosphatidylglycerol metabolic process (GO:0046471)	26	1	0.04	+	24.16	0.0421
primary metabolic process (GO:0044238)	6912	17	11	+	1.54	0.0431
positive regulation of fatty acid biosynthetic process (GO:0045723)	27	1	0.04	+	23.26	0.0436
heparan sulfate proteoglycan biosynthetic process (GO:0015012)	27	1	0.04	+	23.26	0.0436
somatic recombination of immunoglobulin genes involved in immune response (GO:0002204)	27	1	0.04	+	23.26	0.0436
regulation of double-strand break repair via nonhomologous end joining (GO:2001032)	27	1	0.04	+	23.26	0.0436
Wnt signaling pathway, planar cell polarity pathway (GO:0060071)	27	1	0.04	+	23.26	0.0436
regulation of transmission of nerve impulse (GO:0051969)	27	1	0.04	+	23.26	0.0436
isotype switching (GO:0045190)	27	1	0.04	+	23.26	0.0436
chordate embryonic development (GO:0043009)	842	4	1.34	+	2.98	0.0441
limb development (GO:0060173)	209	2	0.33	+	6.01	0.0442
appendage development (GO:0048736)	209	2	0.33	+	6.01	0.0442
nucleobase-containing compound biosynthetic process (GO:0034654)	844	4	1.34	+	2.98	0.0444
regulation of protein ubiquitination (GO:0031396)	210	2	0.33	+	5.98	0.0446
telencephalon glial cell migration (GO:0022030)	28	1	0.04	+	22.43	0.0451
phagosome maturation (GO:0090382)	28	1	0.04	+	22.43	0.0451
cochlea morphogenesis (GO:0090103)	28	1	0.04	+	22.43	0.0451
cerebral cortex radial glia-guided migration (GO:0021801)	28	1	0.04	+	22.43	0.0451
negative regulation of metabolic process (GO:0009892)	2967	9	4.72	+	1.91	0.0453
regulation of DNA repair (GO:0006282)	212	2	0.34	+	5.93	0.0454
cellular biosynthetic process (GO:0044249)	3923	11	6.25	+	1.76	0.0456
embryo development (GO:0009790)	1241	5	1.98	+	2.53	0.0456
postreplication repair (GO:0006301)	29	1	0.05	+	21.66	0.0466
acylglycerol catabolic process (GO:0046464)	29	1	0.05	+	21.66	0.0466
neutral lipid catabolic process (GO:0046461)	29	1	0.05	+	21.66	0.0466
postsynaptic density organization (GO:0097106)	29	1	0.05	+	21.66	0.0466
embryo development ending in birth or egg hatching (GO:0009792)	859	4	1.37	+	2.92	0.0469
bone development (GO:0060348)	217	2	0.35	+	5.79	0.0473
regulation of cysteine-type endopeptidase activity (GO:2000116)	217	2	0.35	+	5.79	0.0473
protein processing (GO:0016485)	219	2	0.35	+	5.74	0.048
establishment of planar polarity (GO:0001736)	30	1	0.05	+	20.94	0.0482
synaptic membrane adhesion (GO:0099560)	30	1	0.05	+	20.94	0.0482
icosanoid secretion (GO:0032309)	30	1	0.05	+	20.94	0.0482
rRNA transcription (GO:0009303)	30	1	0.05	+	20.94	0.0482
pteridine-containing compound metabolic process (GO:0042558)	30	1	0.05	+	20.94	0.0482
positive regulation of protein modification process (GO:0031401)	869	4	1.38	+	2.89	0.0486
regulation of osteoblast proliferation (GO:0033688)	31	1	0.05	+	20.26	0.0497
establishment of tissue polarity (GO:0007164)	31	1	0.05	+	20.26	0.0497
somatic diversification of immunoglobulins involved in immune response (GO:0002208)	31	1	0.05	+	20.26	0.0497
positive regulation of telomerase activity (GO:0051973)	31	1	0.05	+	20.26	0.0497
maintenance of synapse structure (GO:0099558)	31	1	0.05	+	20.26	0.0497
deoxyribonucleoside monophosphate metabolic process (GO:0009162)	31	1	0.05	+	20.26	0.0497
macromolecule localization (GO:0033036)	2408	8	3.83	+	2.09	0.0498

## Sheet: Supplementary File 3c
GO biological process complete	Mus musculus - REFLIST (21983)	Client Text Box Input (54)	Client Text Box Input (expected)	Client Text Box Input (over/under)	Client Text Box Input (fold Enrichment)	Client Text Box Input (raw P-value)
cell cycle (GO:0007049)	1289	23	3.17	+	7.26	1e-14
DNA replication (GO:0006260)	177	11	0.43	+	25.3	9.03e-13
cell cycle process (GO:0022402)	871	18	2.14	+	8.41	1.66e-12
mitotic cell cycle (GO:0000278)	555	14	1.36	+	10.27	6.27e-11
DNA metabolic process (GO:0006259)	705	14	1.73	+	8.08	1.32e-09
chromosome organization (GO:0051276)	435	11	1.07	+	10.29	9.03e-09
cellular component organization or biogenesis (GO:0071840)	5691	34	13.98	+	2.43	1.17e-08
double-strand break repair via homologous recombination (GO:0000724)	111	7	0.27	+	25.67	1.52e-08
recombinational repair (GO:0000725)	116	7	0.28	+	24.57	2.02e-08
cellular component organization (GO:0016043)	5478	33	13.46	+	2.45	2.03e-08
DNA-templated DNA replication (GO:0006261)	120	7	0.29	+	23.75	2.53e-08
DNA repair (GO:0006281)	483	11	1.19	+	9.27	2.58e-08
mitotic cell cycle process (GO:1903047)	491	11	1.21	+	9.12	3.04e-08
cell division (GO:0051301)	511	11	1.26	+	8.76	4.52e-08
DNA recombination (GO:0006310)	240	8	0.59	+	13.57	1.53e-07
organelle organization (GO:0006996)	3012	23	7.4	+	3.11	2.08e-07
DNA damage response (GO:0006974)	748	12	1.84	+	6.53	2.35e-07
regulation of mitotic sister chromatid segregation (GO:0033047)	57	5	0.14	+	35.71	4.25e-07
regulation of mitotic sister chromatid separation (GO:0010965)	59	5	0.14	+	34.5	4.99e-07
double-strand break repair (GO:0006302)	204	7	0.5	+	13.97	8.08e-07
heterocycle metabolic process (GO:0046483)	2743	21	6.74	+	3.12	8.86e-07
microtubule cytoskeleton organization involved in mitosis (GO:1902850)	129	6	0.32	+	18.93	9.59e-07
nucleic acid metabolic process (GO:0090304)	2045	18	5.02	+	3.58	1.02e-06
organic cyclic compound metabolic process (GO:1901360)	3059	22	7.51	+	2.93	1.24e-06
cellular aromatic compound metabolic process (GO:0006725)	2800	21	6.88	+	3.05	1.24e-06
regulation of chromosome separation (GO:1905818)	72	5	0.18	+	28.27	1.26e-06
nucleobase-containing compound metabolic process (GO:0006139)	2577	20	6.33	+	3.16	1.47e-06
meiotic cell cycle (GO:0051321)	327	8	0.8	+	9.96	1.49e-06
mitotic spindle assembly checkpoint signaling (GO:0007094)	33	4	0.08	+	49.34	2e-06
spindle assembly checkpoint signaling (GO:0071173)	33	4	0.08	+	49.34	2e-06
mitotic spindle checkpoint signaling (GO:0071174)	35	4	0.09	+	46.52	2.48e-06
regulation of chromosome organization (GO:0033044)	244	7	0.6	+	11.68	2.57e-06
negative regulation of mitotic sister chromatid separation (GO:2000816)	36	4	0.09	+	45.23	2.76e-06
negative regulation of mitotic sister chromatid segregation (GO:0033048)	36	4	0.09	+	45.23	2.76e-06
negative regulation of sister chromatid segregation (GO:0033046)	36	4	0.09	+	45.23	2.76e-06
negative regulation of mitotic metaphase/anaphase transition (GO:0045841)	36	4	0.09	+	45.23	2.76e-06
cellular response to stress (GO:0033554)	1534	15	3.77	+	3.98	2.99e-06
spindle checkpoint signaling (GO:0031577)	37	4	0.09	+	44.01	3.05e-06
spindle organization (GO:0007051)	160	6	0.39	+	15.27	3.2e-06
negative regulation of metaphase/anaphase transition of cell cycle (GO:1902100)	38	4	0.09	+	42.85	3.36e-06
negative regulation of chromosome separation (GO:1905819)	38	4	0.09	+	42.85	3.36e-06
regulation of mitotic metaphase/anaphase transition (GO:0030071)	89	5	0.22	+	22.87	3.4e-06
regulation of metaphase/anaphase transition of cell cycle (GO:1902099)	92	5	0.23	+	22.12	3.97e-06
negative regulation of chromosome segregation (GO:0051985)	40	4	0.1	+	40.71	4.06e-06
mitotic spindle organization (GO:0007052)	94	5	0.23	+	21.65	4.39e-06
positive regulation of attachment of spindle microtubules to kinetochore (GO:0051987)	12	3	0.03	+	> 100	6.2e-06
positive regulation of mitotic cell cycle spindle assembly checkpoint (GO:0090267)	12	3	0.03	+	> 100	6.2e-06
double-strand break repair via break-induced replication (GO:0000727)	12	3	0.03	+	> 100	6.2e-06
cytoskeleton-dependent cytokinesis (GO:0061640)	103	5	0.25	+	19.76	6.73e-06
cellular metabolic process (GO:0044237)	6463	32	15.88	+	2.02	6.78e-06
negative regulation of mitotic nuclear division (GO:0045839)	46	4	0.11	+	35.4	6.82e-06
regulation of sister chromatid segregation (GO:0033045)	105	5	0.26	+	19.39	7.36e-06
positive regulation of spindle checkpoint (GO:0090232)	13	3	0.03	+	93.94	7.61e-06
cytokinesis (GO:0000910)	111	5	0.27	+	18.34	9.54e-06
regulation of mitotic nuclear division (GO:0007088)	118	5	0.29	+	17.25	1.27e-05
positive regulation of cell cycle checkpoint (GO:1901978)	16	3	0.04	+	76.33	1.31e-05
negative regulation of nuclear division (GO:0051784)	55	4	0.14	+	29.61	1.33e-05
nuclear division (GO:0000280)	324	7	0.8	+	8.8	1.56e-05
reproductive process (GO:0022414)	1547	14	3.8	+	3.68	1.66e-05
meiotic cell cycle process (GO:1903046)	216	6	0.53	+	11.31	1.69e-05
reproduction (GO:0000003)	1555	14	3.82	+	3.67	1.76e-05
chromosome segregation (GO:0007059)	331	7	0.81	+	8.61	1.79e-05
positive regulation of mitotic sister chromatid separation (GO:1901970)	18	3	0.04	+	67.85	1.79e-05
regulation of chromosome segregation (GO:0051983)	129	5	0.32	+	15.78	1.92e-05
mitotic sister chromatid segregation (GO:0000070)	131	5	0.32	+	15.54	2.06e-05
mitotic cell cycle checkpoint signaling (GO:0007093)	135	5	0.33	+	15.08	2.37e-05
sister chromatid segregation (GO:0000819)	135	5	0.33	+	15.08	2.37e-05
regulation of attachment of spindle microtubules to kinetochore (GO:0051988)	20	3	0.05	+	61.06	2.38e-05
DNA unwinding involved in DNA replication (GO:0006268)	20	3	0.05	+	61.06	2.38e-05
cellular nitrogen compound metabolic process (GO:0034641)	3108	20	7.63	+	2.62	2.56e-05
organelle fission (GO:0048285)	351	7	0.86	+	8.12	2.59e-05
nuclear chromosome segregation (GO:0098813)	234	6	0.57	+	10.44	2.61e-05
regulation of mitotic cell cycle spindle assembly checkpoint (GO:0090266)	21	3	0.05	+	58.16	2.71e-05
regulation of mitotic spindle checkpoint (GO:1903504)	21	3	0.05	+	58.16	2.71e-05
regulation of organelle organization (GO:0033043)	1196	12	2.94	+	4.08	2.8e-05
cytoskeleton organization (GO:0007010)	1201	12	2.95	+	4.07	2.92e-05
centromere complex assembly (GO:0034508)	23	3	0.06	+	53.1	3.47e-05
negative regulation of organelle organization (GO:0010639)	368	7	0.9	+	7.74	3.48e-05
DNA replication initiation (GO:0006270)	24	3	0.06	+	50.89	3.9e-05
regulation of spindle checkpoint (GO:0090231)	24	3	0.06	+	50.89	3.9e-05
regulation of nuclear division (GO:0051783)	151	5	0.37	+	13.48	3.99e-05
protein-DNA complex assembly (GO:0065004)	153	5	0.38	+	13.3	4.24e-05
mitotic cytokinesis (GO:0000281)	76	4	0.19	+	21.43	4.44e-05
mitotic nuclear division (GO:0140014)	157	5	0.39	+	12.96	4.77e-05
negative regulation of cellular process (GO:0048523)	5040	26	12.38	+	2.1	5.64e-05
nitrogen compound metabolic process (GO:0006807)	6351	30	15.6	+	1.92	5.68e-05
positive regulation of chromosome separation (GO:1905820)	28	3	0.07	+	43.62	5.96e-05
negative regulation of chromosome organization (GO:2001251)	83	4	0.2	+	19.62	6.16e-05
microtubule cytoskeleton organization (GO:0000226)	556	8	1.37	+	5.86	6.46e-05
positive regulation of chromosome segregation (GO:0051984)	29	3	0.07	+	42.11	6.56e-05
negative regulation of cell cycle process (GO:0010948)	280	6	0.69	+	8.72	6.94e-05
sexual reproduction (GO:0019953)	1107	11	2.72	+	4.05	6.99e-05
cell cycle checkpoint signaling (GO:0000075)	172	5	0.42	+	11.83	7.26e-05
negative regulation of cellular component organization (GO:0051129)	778	9	1.91	+	4.71	0.000114
cellular process (GO:0009987)	15465	50	37.99	+	1.32	0.00013
cytokinetic process (GO:0032506)	38	3	0.09	+	32.14	0.000139
DNA replication-dependent chromatin assembly (GO:0006335)	6	2	0.01	+	> 100	0.000163
premeiotic DNA replication (GO:0006279)	6	2	0.01	+	> 100	0.000163
DNA duplex unwinding (GO:0032508)	41	3	0.1	+	29.79	0.000172
negative regulation of mitotic cell cycle (GO:0045930)	225	5	0.55	+	9.05	0.000247
negative regulation of biological process (GO:0048519)	5522	26	13.56	+	1.92	0.000249
regulation of cell cycle checkpoint (GO:1901976)	47	3	0.12	+	25.98	0.000251
positive regulation of attachment of mitotic spindle microtubules to kinetochore (GO:1902425)	8	2	0.02	+	> 100	0.000262
mitotic spindle midzone assembly (GO:0051256)	8	2	0.02	+	> 100	0.000262
mitotic spindle elongation (GO:0000022)	8	2	0.02	+	> 100	0.000262
positive regulation of mitotic cytokinesis (GO:1903490)	8	2	0.02	+	> 100	0.000262
DNA geometric change (GO:0032392)	48	3	0.12	+	25.44	0.000267
regulation of DNA metabolic process (GO:0051052)	515	7	1.27	+	5.53	0.000272
negative regulation of cell cycle (GO:0045786)	366	6	0.9	+	6.67	0.00029
negative regulation of cell cycle phase transition (GO:1901988)	236	5	0.58	+	8.62	0.000307
regulation of attachment of mitotic spindle microtubules to kinetochore (GO:1902423)	9	2	0.02	+	90.47	0.00032
phosphatidylcholine metabolic process (GO:0046470)	54	3	0.13	+	22.62	0.000371
regulation of mitotic cytokinesis (GO:1902412)	10	2	0.02	+	81.42	0.000383
spindle midzone assembly (GO:0051255)	10	2	0.02	+	81.42	0.000383
DNA conformation change (GO:0071103)	57	3	0.14	+	21.43	0.000431
osteoblast proliferation (GO:0033687)	11	2	0.03	+	74.02	0.000452
spindle elongation (GO:0051231)	11	2	0.03	+	74.02	0.000452
macromolecule localization (GO:0033036)	2408	15	5.92	+	2.54	0.00053
cell cycle phase transition (GO:0044770)	150	4	0.37	+	10.86	0.000553
nucleosome assembly (GO:0006334)	63	3	0.15	+	19.39	0.000571
positive regulation of cell cycle process (GO:0090068)	272	5	0.67	+	7.48	0.000579
kinetochore assembly (GO:0051382)	13	2	0.03	+	62.63	0.000606
low-density lipoprotein particle remodeling (GO:0034374)	13	2	0.03	+	62.63	0.000606
regulation of metaphase plate congression (GO:0090235)	14	2	0.03	+	58.16	0.000692
regulation of cell cycle phase transition (GO:1901987)	444	6	1.09	+	5.5	0.000791
lymphocyte migration (GO:0072676)	71	3	0.17	+	17.2	0.000797
negative regulation of mitotic cell cycle phase transition (GO:1901991)	166	4	0.41	+	9.81	0.0008
organic substance metabolic process (GO:0071704)	7637	31	18.76	+	1.65	0.000827
macromolecule metabolic process (GO:0043170)	5835	26	14.33	+	1.81	0.000938
metabolic process (GO:0008152)	8051	32	19.78	+	1.62	0.000953
kinetochore organization (GO:0051383)	17	2	0.04	+	47.89	0.000981
primary metabolic process (GO:0044238)	6912	29	16.98	+	1.71	0.00101
microtubule-based process (GO:0007017)	848	8	2.08	+	3.84	0.00107
cellular component biogenesis (GO:0044085)	2589	15	6.36	+	2.36	0.00113
nucleosome organization (GO:0034728)	81	3	0.2	+	15.08	0.00115
regulation of cell cycle (GO:0051726)	1078	9	2.65	+	3.4	0.0012
meiotic nuclear division (GO:0140013)	188	4	0.46	+	8.66	0.00126
presynapse assembly (GO:0099054)	20	2	0.05	+	40.71	0.00132
mismatch repair (GO:0006298)	21	2	0.05	+	38.77	0.00144
non-membrane-bounded organelle assembly (GO:0140694)	336	5	0.83	+	6.06	0.00146
regulation of mitotic cell cycle phase transition (GO:1901990)	340	5	0.84	+	5.99	0.00154
protein-containing complex organization (GO:0043933)	1850	12	4.54	+	2.64	0.00154
regulation of mitotic cell cycle (GO:0007346)	510	6	1.25	+	4.79	0.0016
protein localization to chromosome (GO:0034502)	92	3	0.23	+	13.27	0.00164
establishment of chromosome localization (GO:0051303)	94	3	0.23	+	12.99	0.00174
spindle assembly (GO:0051225)	95	3	0.23	+	12.86	0.00179
nuclear DNA replication (GO:0033260)	24	2	0.06	+	33.92	0.00184
regulation of cytokinesis (GO:0032465)	96	3	0.24	+	12.72	0.00185
positive regulation of cell cycle (GO:0045787)	355	5	0.87	+	5.73	0.00186
mononuclear cell migration (GO:0071674)	98	3	0.24	+	12.46	0.00196
regulation of stress fiber assembly (GO:0051492)	98	3	0.24	+	12.46	0.00196
folic acid-containing compound metabolic process (GO:0006760)	25	2	0.06	+	32.57	0.00199
cell cycle DNA replication (GO:0044786)	25	2	0.06	+	32.57	0.00199
phosphatidylethanolamine metabolic process (GO:0046337)	25	2	0.06	+	32.57	0.00199
plasma lipoprotein particle remodeling (GO:0034369)	25	2	0.06	+	32.57	0.00199
protein-lipid complex remodeling (GO:0034368)	25	2	0.06	+	32.57	0.00199
chromosome localization (GO:0050000)	100	3	0.25	+	12.21	0.00207
presynapse organization (GO:0099172)	26	2	0.06	+	31.31	0.00214
protein-DNA complex organization (GO:0071824)	744	7	1.83	+	3.83	0.00228
regulation of cell cycle process (GO:0010564)	747	7	1.83	+	3.81	0.00233
protein-containing complex remodeling (GO:0034367)	28	2	0.07	+	29.08	0.00245
attachment of spindle microtubules to kinetochore (GO:0008608)	29	2	0.07	+	28.08	0.00262
pteridine-containing compound metabolic process (GO:0042558)	30	2	0.07	+	27.14	0.00279
regulation of actomyosin structure organization (GO:0110020)	112	3	0.28	+	10.9	0.00283
positive regulation of telomerase activity (GO:0051973)	31	2	0.08	+	26.26	0.00296
glycerophospholipid catabolic process (GO:0046475)	31	2	0.08	+	26.26	0.00296
T cell migration (GO:0072678)	31	2	0.08	+	26.26	0.00296
cellular response to stimulus (GO:0051716)	6747	27	16.57	+	1.63	0.00301
regulation of actin filament bundle assembly (GO:0032231)	115	3	0.28	+	10.62	0.00304
negative regulation of stress fiber assembly (GO:0051497)	33	2	0.08	+	24.67	0.00333
positive regulation of telomere maintenance via telomerase (GO:0032212)	34	2	0.08	+	23.95	0.00352
negative regulation of response to stimulus (GO:0048585)	1781	11	4.37	+	2.51	0.00365
regulation of protein phosphorylation (GO:0001932)	1038	8	2.55	+	3.14	0.00375
establishment of organelle localization (GO:0051656)	428	5	1.05	+	4.76	0.00411
protein export from nucleus (GO:0006611)	37	2	0.09	+	22.01	0.00412
positive regulation of telomere maintenance via telomere lengthening (GO:1904358)	38	2	0.09	+	21.43	0.00433
meiosis I (GO:0007127)	132	3	0.32	+	9.25	0.00444
regulation of cellular component organization (GO:0051128)	2595	14	6.37	+	2.2	0.00446
plasma lipoprotein particle organization (GO:0071827)	39	2	0.1	+	20.88	0.00455
regulation of DNA-templated DNA replication (GO:0090329)	39	2	0.1	+	20.88	0.00455
negative regulation of actin filament bundle assembly (GO:0032232)	39	2	0.1	+	20.88	0.00455
meiosis I cell cycle process (GO:0061982)	134	3	0.33	+	9.11	0.00463
cell cycle comprising mitosis without cytokinesis (GO:0033301)	1	1	0	+	> 100	0.00489
pericentric heterochromatin organization (GO:0140462)	1	1	0	+	> 100	0.00489
lateral attachment of mitotic spindle microtubules to kinetochore (GO:0099607)	1	1	0	+	> 100	0.00489
microtubule plus-end directed mitotic chromosome migration (GO:0099606)	1	1	0	+	> 100	0.00489
chaperone mediated protein folding independent of cofactor (GO:0051086)	1	1	0	+	> 100	0.00489
positive regulation of phagosome maturation (GO:1905164)	1	1	0	+	> 100	0.00489
positive regulation of lateral attachment of mitotic spindle microtubules to kinetochore (GO:1905116)	1	1	0	+	> 100	0.00489
regulation of lateral attachment of mitotic spindle microtubules to kinetochore (GO:1905115)	1	1	0	+	> 100	0.00489
negative regulation of canonical Wnt signaling pathway (GO:0090090)	137	3	0.34	+	8.91	0.00491
negative regulation of DNA metabolic process (GO:0051053)	138	3	0.34	+	8.85	0.00501
regulation of telomerase activity (GO:0051972)	42	2	0.1	+	19.39	0.00522
establishment of skin barrier (GO:0061436)	42	2	0.1	+	19.39	0.00522
regulation of protein modification process (GO:0031399)	1347	9	3.31	+	2.72	0.00533
protein-lipid complex organization (GO:0071825)	43	2	0.11	+	18.93	0.00545
regulation of ossification (GO:0030278)	143	3	0.35	+	8.54	0.00552
negative regulation of signal transduction (GO:0009968)	1355	9	3.33	+	2.7	0.00553
cell cycle G2/M phase transition (GO:0044839)	45	2	0.11	+	18.09	0.00594
regulation of phosphorylation (GO:0042325)	1123	8	2.76	+	2.9	0.00598
cellular component assembly (GO:0022607)	2342	13	5.75	+	2.26	0.00602
negative regulation of macromolecule metabolic process (GO:0010605)	2733	14	6.71	+	2.09	0.00612
cellular response to abiotic stimulus (GO:0071214)	295	4	0.72	+	5.52	0.00617
cellular response to environmental stimulus (GO:0104004)	295	4	0.72	+	5.52	0.00617
negative regulation of ossification (GO:0030279)	46	2	0.11	+	17.7	0.00619
cellular localization (GO:0051641)	2747	14	6.75	+	2.07	0.00634
skin epidermis development (GO:0098773)	151	3	0.37	+	8.09	0.0064
positive regulation of protein phosphorylation (GO:0001934)	679	6	1.67	+	3.6	0.00642
replication fork processing (GO:0031297)	47	2	0.12	+	17.32	0.00644
cellular biosynthetic process (GO:0044249)	3923	18	9.64	+	1.87	0.00652
positive regulation of binding (GO:0051099)	156	3	0.38	+	7.83	0.00698
positive regulation of cytokinesis (GO:0032467)	50	2	0.12	+	16.28	0.00723
phospholipid catabolic process (GO:0009395)	50	2	0.12	+	16.28	0.00723
regulation of ATP citrate synthase activity (GO:2000983)	2	1	0	+	> 100	0.00733
regulation of systemic arterial blood pressure by atrial natriuretic peptide (GO:0003050)	2	1	0	+	> 100	0.00733
leukocyte migration involved in immune response (GO:0002522)	2	1	0	+	> 100	0.00733
mitotic chromosome movement towards spindle pole (GO:0007079)	2	1	0	+	> 100	0.00733
positive regulation of DNA endoreduplication (GO:0032877)	2	1	0	+	> 100	0.00733
ethanolamine metabolic process (GO:0006580)	2	1	0	+	> 100	0.00733
positive regulation of presynaptic membrane organization (GO:1901631)	2	1	0	+	> 100	0.00733
ossification involved in bone remodeling (GO:0043932)	2	1	0	+	> 100	0.00733
establishment of planar polarity involved in neural tube closure (GO:0090177)	2	1	0	+	> 100	0.00733
negative regulation of ERBB4 signaling pathway (GO:0120154)	2	1	0	+	> 100	0.00733
negative regulation of protein localization to nucleolus (GO:1904750)	2	1	0	+	> 100	0.00733
replication fork arrest (GO:0043111)	2	1	0	+	> 100	0.00733
tetrahydrofolylpolyglutamate metabolic process (GO:0046900)	2	1	0	+	> 100	0.00733
O-glycan processing, core 1 (GO:0016267)	2	1	0	+	> 100	0.00733
cardiac muscle tissue growth involved in heart morphogenesis (GO:0003245)	2	1	0	+	> 100	0.00733
chylomicron remodeling (GO:0034371)	2	1	0	+	> 100	0.00733
snRNA import into nucleus (GO:0061015)	2	1	0	+	> 100	0.00733
response to UV (GO:0009411)	160	3	0.39	+	7.63	0.00748
mitotic spindle assembly (GO:0090307)	51	2	0.13	+	15.96	0.0075
organic substance biosynthetic process (GO:1901576)	4034	18	9.91	+	1.82	0.00768
RNA localization (GO:0006403)	162	3	0.4	+	7.54	0.00773
DNA-templated DNA replication maintenance of fidelity (GO:0045005)	52	2	0.13	+	15.66	0.00777
regulation of telomere maintenance via telomerase (GO:0032210)	52	2	0.13	+	15.66	0.00777
glycerolipid catabolic process (GO:0046503)	53	2	0.13	+	15.36	0.00805
regulation of plasma lipoprotein particle levels (GO:0097006)	53	2	0.13	+	15.36	0.00805
protein localization (GO:0008104)	1986	11	4.88	+	2.25	0.00819
cellular macromolecule localization (GO:0070727)	1994	11	4.9	+	2.25	0.00844
biosynthetic process (GO:0009058)	4090	18	10.05	+	1.79	0.00847
negative regulation of Wnt signaling pathway (GO:0030178)	169	3	0.42	+	7.23	0.00866
positive regulation of phosphorylation (GO:0042327)	728	6	1.79	+	3.36	0.00889
macromolecule biosynthetic process (GO:0009059)	3095	15	7.6	+	1.97	0.0091
negative regulation of signaling (GO:0023057)	1477	9	3.63	+	2.48	0.00952
negative regulation of cell communication (GO:0010648)	1480	9	3.64	+	2.48	0.00964
localization (GO:0051179)	4409	19	10.83	+	1.75	0.0097
cytoplasmic actin-based contraction involved in cell motility (GO:0060327)	3	1	0.01	+	> 100	0.00977
maternal aggressive behavior (GO:0002125)	3	1	0.01	+	> 100	0.00977
cellular response to hydrostatic pressure (GO:0071464)	3	1	0.01	+	> 100	0.00977
regulation of presynaptic membrane organization (GO:1901629)	3	1	0.01	+	> 100	0.00977
positive regulation of immune complex clearance by monocytes and macrophages (GO:0090265)	3	1	0.01	+	> 100	0.00977
regulation of immune complex clearance by monocytes and macrophages (GO:0090264)	3	1	0.01	+	> 100	0.00977
negative regulation of thrombin-activated receptor signaling pathway (GO:0070495)	3	1	0.01	+	> 100	0.00977
regulation of thrombin-activated receptor signaling pathway (GO:0070494)	3	1	0.01	+	> 100	0.00977
regulation of phagosome maturation (GO:1905162)	3	1	0.01	+	> 100	0.00977
positive regulation of antifungal innate immune response (GO:1905036)	3	1	0.01	+	> 100	0.00977
positive regulation of organelle organization (GO:0010638)	529	5	1.3	+	3.85	0.00977
negative regulation of apoptotic process (GO:0043066)	981	7	2.41	+	2.9	0.0101
regulation of telomere maintenance via telomere lengthening (GO:1904356)	61	2	0.15	+	13.35	0.0105
negative regulation of nitrogen compound metabolic process (GO:0051172)	2288	12	5.62	+	2.14	0.0112
cellular modified amino acid metabolic process (GO:0006575)	188	3	0.46	+	6.5	0.0115
regulation of cell division (GO:0051302)	188	3	0.46	+	6.5	0.0115
regulation of binding (GO:0051098)	355	4	0.87	+	4.59	0.0116
negative regulation of programmed cell death (GO:0043069)	1011	7	2.48	+	2.82	0.0117
negative regulation of cysteine-type endopeptidase activity involved in apoptotic process (GO:0043154)	66	2	0.16	+	12.34	0.0121
actomyosin contractile ring assembly actin filament organization (GO:2000689)	4	1	0.01	+	> 100	0.0122
CDP-choline pathway (GO:0006657)	4	1	0.01	+	> 100	0.0122
regulation of DNA endoreduplication (GO:0032875)	4	1	0.01	+	> 100	0.0122
negative regulation of intrinsic apoptotic signaling pathway in response to osmotic stress (GO:1902219)	4	1	0.01	+	> 100	0.0122
RNA import into nucleus (GO:0006404)	4	1	0.01	+	> 100	0.0122
unidimensional cell growth (GO:0009826)	4	1	0.01	+	> 100	0.0122
regulation of myeloid progenitor cell differentiation (GO:1905453)	4	1	0.01	+	> 100	0.0122
synaptic assembly at neuromuscular junction (GO:0051124)	4	1	0.01	+	> 100	0.0122
regulation of renal sodium excretion (GO:0035813)	4	1	0.01	+	> 100	0.0122
positive regulation of telomerase RNA localization to Cajal body (GO:1904874)	4	1	0.01	+	> 100	0.0122
negative regulation of female receptivity (GO:0007621)	4	1	0.01	+	> 100	0.0122
regulation of protein binding (GO:0043393)	193	3	0.47	+	6.33	0.0123
organelle localization (GO:0051640)	566	5	1.39	+	3.6	0.0128
DNA biosynthetic process (GO:0071897)	68	2	0.17	+	11.97	0.0128
regulation of phosphate metabolic process (GO:0019220)	1296	8	3.18	+	2.51	0.0135
regulation of phosphorus metabolic process (GO:0051174)	1297	8	3.19	+	2.51	0.0136
positive regulation of telomere maintenance (GO:0032206)	71	2	0.17	+	11.47	0.0139
negative regulation of metabolic process (GO:0009892)	2967	14	7.29	+	1.92	0.0146
platelet activating factor biosynthetic process (GO:0006663)	5	1	0.01	+	81.42	0.0146
spindle assembly involved in female meiosis I (GO:0007057)	5	1	0.01	+	81.42	0.0146
positive regulation of cellular pH reduction (GO:0032849)	5	1	0.01	+	81.42	0.0146
nuclear cell cycle DNA replication initiation (GO:1902315)	5	1	0.01	+	81.42	0.0146
RNA localization to nucleus (GO:0090685)	5	1	0.01	+	81.42	0.0146
RNA localization to Cajal body (GO:0090670)	5	1	0.01	+	81.42	0.0146
scaRNA localization to Cajal body (GO:0090666)	5	1	0.01	+	81.42	0.0146
cell cycle DNA replication initiation (GO:1902292)	5	1	0.01	+	81.42	0.0146
cellular response to water stimulus (GO:0071462)	5	1	0.01	+	81.42	0.0146
DNA replication, synthesis of RNA primer (GO:0006269)	5	1	0.01	+	81.42	0.0146
response to hydrostatic pressure (GO:0051599)	5	1	0.01	+	81.42	0.0146
retrograde trans-synaptic signaling by trans-synaptic protein complex (GO:0098942)	5	1	0.01	+	81.42	0.0146
chromosome movement towards spindle pole (GO:0051305)	5	1	0.01	+	81.42	0.0146
negative regulation of guanyl-nucleotide exchange factor activity (GO:1905098)	5	1	0.01	+	81.42	0.0146
regulation of antifungal innate immune response (GO:1905034)	5	1	0.01	+	81.42	0.0146
susceptibility to natural killer cell mediated cytotoxicity (GO:0042271)	5	1	0.01	+	81.42	0.0146
establishment of planar polarity of embryonic epithelium (GO:0042249)	5	1	0.01	+	81.42	0.0146
negative regulation of mitotic recombination (GO:0045950)	5	1	0.01	+	81.42	0.0146
growth involved in heart morphogenesis (GO:0003241)	5	1	0.01	+	81.42	0.0146
mitotic DNA replication initiation (GO:1902975)	5	1	0.01	+	81.42	0.0146
very-low-density lipoprotein particle remodeling (GO:0034372)	5	1	0.01	+	81.42	0.0146
positive regulation of phosphorus metabolic process (GO:0010562)	821	6	2.02	+	2.98	0.0153
positive regulation of phosphate metabolic process (GO:0045937)	821	6	2.02	+	2.98	0.0153
positive regulation of DNA biosynthetic process (GO:2000573)	75	2	0.18	+	10.86	0.0153
regulation of catalytic activity (GO:0050790)	1599	9	3.93	+	2.29	0.0154
metaphase chromosome alignment (GO:0051310)	78	2	0.19	+	10.44	0.0165
organelle assembly (GO:0070925)	837	6	2.06	+	2.92	0.0167
positive regulation of opsonization (GO:1903028)	6	1	0.01	+	67.85	0.017
negative regulation of double-strand break repair via nonhomologous end joining (GO:2001033)	6	1	0.01	+	67.85	0.017
dTMP biosynthetic process (GO:0006231)	6	1	0.01	+	67.85	0.017
negative regulation of cytokinesis (GO:0032466)	6	1	0.01	+	67.85	0.017
negative regulation of DNA-templated DNA replication (GO:2000104)	6	1	0.01	+	67.85	0.017
negative regulation of skeletal muscle tissue development (GO:0048642)	6	1	0.01	+	67.85	0.017
cardiolipin acyl-chain remodeling (GO:0035965)	6	1	0.01	+	67.85	0.017
hemidesmosome assembly (GO:0031581)	6	1	0.01	+	67.85	0.017
positive regulation of exit from mitosis (GO:0031536)	6	1	0.01	+	67.85	0.017
snRNA transport (GO:0051030)	6	1	0.01	+	67.85	0.017
calcium-independent cell-cell adhesion via plasma membrane cell-adhesion molecules (GO:0016338)	6	1	0.01	+	67.85	0.017
pyrimidine deoxyribonucleoside monophosphate biosynthetic process (GO:0009177)	6	1	0.01	+	67.85	0.017
choline metabolic process (GO:0019695)	6	1	0.01	+	67.85	0.017
chylomicron remnant clearance (GO:0034382)	6	1	0.01	+	67.85	0.017
positive regulation of protein binding (GO:0032092)	82	2	0.2	+	9.93	0.0181
negative regulation of cysteine-type endopeptidase activity (GO:2000117)	84	2	0.21	+	9.69	0.0189
triglyceride-rich lipoprotein particle clearance (GO:0071830)	7	1	0.02	+	58.16	0.0194
blood vessel maturation (GO:0001955)	7	1	0.02	+	58.16	0.0194
regulation of intrinsic apoptotic signaling pathway in response to osmotic stress (GO:1902218)	7	1	0.02	+	58.16	0.0194
lipid droplet disassembly (GO:1905691)	7	1	0.02	+	58.16	0.0194
regulation of telomerase RNA localization to Cajal body (GO:1904872)	7	1	0.02	+	58.16	0.0194
cleavage furrow formation (GO:0036089)	7	1	0.02	+	58.16	0.0194
ribosomal small subunit export from nucleus (GO:0000056)	7	1	0.02	+	58.16	0.0194
ribosomal large subunit export from nucleus (GO:0000055)	7	1	0.02	+	58.16	0.0194
regulation of mitotic recombination (GO:0000019)	7	1	0.02	+	58.16	0.0194
positive regulation of mitotic sister chromatid segregation (GO:0062033)	7	1	0.02	+	58.16	0.0194
platelet activating factor metabolic process (GO:0046469)	7	1	0.02	+	58.16	0.0194
chorionic trophoblast cell differentiation (GO:0060718)	7	1	0.02	+	58.16	0.0194
triglyceride-rich lipoprotein particle remodeling (GO:0034370)	7	1	0.02	+	58.16	0.0194
positive regulation of protein modification process (GO:0031401)	869	6	2.13	+	2.81	0.0197
response to stress (GO:0006950)	3310	15	8.13	+	1.84	0.0199
leukocyte migration (GO:0050900)	240	3	0.59	+	5.09	0.0217
regulation of opsonization (GO:1903027)	8	1	0.02	+	50.89	0.0218
actomyosin contractile ring organization (GO:0044837)	8	1	0.02	+	50.89	0.0218
regulation of cellular pH reduction (GO:0032847)	8	1	0.02	+	50.89	0.0218
actomyosin contractile ring assembly (GO:0000915)	8	1	0.02	+	50.89	0.0218
assembly of actomyosin apparatus involved in cytokinesis (GO:0000912)	8	1	0.02	+	50.89	0.0218
hepatocyte growth factor receptor signaling pathway (GO:0048012)	8	1	0.02	+	50.89	0.0218
regulation of defense response to fungus (GO:1900150)	8	1	0.02	+	50.89	0.0218
amyloid-beta clearance by cellular catabolic process (GO:0150094)	8	1	0.02	+	50.89	0.0218
skeletal myofibril assembly (GO:0014866)	8	1	0.02	+	50.89	0.0218
chromatin organization (GO:0006325)	663	5	1.63	+	3.07	0.0235
positive regulation of mitotic cell cycle phase transition (GO:1901992)	95	2	0.23	+	8.57	0.0237
positive regulation of cell division (GO:0051781)	95	2	0.23	+	8.57	0.0237
response to radiation (GO:0009314)	445	4	1.09	+	3.66	0.0242
CENP-A containing chromatin assembly (GO:0034080)	9	1	0.02	+	45.23	0.0242
protein localization to nucleolus (GO:1902570)	9	1	0.02	+	45.23	0.0242
spindle assembly involved in female meiosis (GO:0007056)	9	1	0.02	+	45.23	0.0242
regulation of resting membrane potential (GO:0060075)	9	1	0.02	+	45.23	0.0242
negative regulation of transmission of nerve impulse (GO:0051970)	9	1	0.02	+	45.23	0.0242
skeletal muscle acetylcholine-gated channel clustering (GO:0071340)	9	1	0.02	+	45.23	0.0242
establishment of centrosome localization (GO:0051660)	9	1	0.02	+	45.23	0.0242
peripheral nervous system myelin maintenance (GO:0032287)	9	1	0.02	+	45.23	0.0242
regulation of excretion (GO:0044062)	9	1	0.02	+	45.23	0.0242
positive regulation of prostaglandin biosynthetic process (GO:0031394)	9	1	0.02	+	45.23	0.0242
regulation of guanyl-nucleotide exchange factor activity (GO:1905097)	9	1	0.02	+	45.23	0.0242
chromatin remodeling at centromere (GO:0031055)	9	1	0.02	+	45.23	0.0242
O-glycan processing (GO:0016266)	9	1	0.02	+	45.23	0.0242
presynaptic membrane assembly (GO:0097105)	9	1	0.02	+	45.23	0.0242
lymphocyte migration into lymphoid organs (GO:0097021)	9	1	0.02	+	45.23	0.0242
negative regulation of molecular function (GO:0044092)	912	6	2.24	+	2.68	0.0243
negative regulation of apoptotic signaling pathway (GO:2001234)	251	3	0.62	+	4.87	0.0244
regulation of molecular function (GO:0065009)	2286	11	5.62	+	1.96	0.0244
regulation of canonical Wnt signaling pathway (GO:0060828)	253	3	0.62	+	4.83	0.0249
regulation of telomere maintenance (GO:0032204)	98	2	0.24	+	8.31	0.025
response to stimulus (GO:0050896)	8811	30	21.64	+	1.39	0.0255
phosphatidylethanolamine biosynthetic process (GO:0006646)	10	1	0.02	+	40.71	0.0266
retrograde trans-synaptic signaling (GO:0098917)	10	1	0.02	+	40.71	0.0266
hepatocyte differentiation (GO:0070365)	10	1	0.02	+	40.71	0.0266
positive regulation of establishment of protein localization to telomere (GO:1904851)	10	1	0.02	+	40.71	0.0266
regulation of protein localization to nucleolus (GO:1904749)	10	1	0.02	+	40.71	0.0266
negative regulation of ubiquitin protein ligase activity (GO:1904667)	10	1	0.02	+	40.71	0.0266
pyrimidine deoxyribonucleotide biosynthetic process (GO:0009221)	10	1	0.02	+	40.71	0.0266
deoxyribonucleoside monophosphate biosynthetic process (GO:0009157)	10	1	0.02	+	40.71	0.0266
ethanolamine-containing compound metabolic process (GO:0042439)	10	1	0.02	+	40.71	0.0266
sphingosine-1-phosphate receptor signaling pathway (GO:0003376)	10	1	0.02	+	40.71	0.0266
postsynaptic membrane assembly (GO:0097104)	10	1	0.02	+	40.71	0.0266
presynaptic membrane organization (GO:0097090)	10	1	0.02	+	40.71	0.0266
glycerophospholipid metabolic process (GO:0006650)	261	3	0.64	+	4.68	0.0269
membrane organization (GO:0061024)	689	5	1.69	+	2.95	0.0272
regulation of transferase activity (GO:0051338)	692	5	1.7	+	2.94	0.0276
positive regulation of unsaturated fatty acid biosynthetic process (GO:2001280)	11	1	0.03	+	37.01	0.029
aggressive behavior (GO:0002118)	11	1	0.03	+	37.01	0.029
cellular hyperosmotic response (GO:0071474)	11	1	0.03	+	37.01	0.029
trans-synaptic signaling by trans-synaptic complex (GO:0099545)	11	1	0.03	+	37.01	0.029
maintenance of postsynaptic specialization structure (GO:0098880)	11	1	0.03	+	37.01	0.029
regulation of establishment of protein localization to telomere (GO:0070203)	11	1	0.03	+	37.01	0.029
response to water (GO:0009415)	11	1	0.03	+	37.01	0.029
ether lipid biosynthetic process (GO:0008611)	11	1	0.03	+	37.01	0.029
positive regulation of skeletal muscle acetylcholine-gated channel clustering (GO:1904395)	11	1	0.03	+	37.01	0.029
T cell chemotaxis (GO:0010818)	11	1	0.03	+	37.01	0.029
glycerol ether biosynthetic process (GO:0046504)	11	1	0.03	+	37.01	0.029
chorion development (GO:0060717)	11	1	0.03	+	37.01	0.029
regulation of female receptivity (GO:0045924)	11	1	0.03	+	37.01	0.029
low-density lipoprotein particle clearance (GO:0034383)	11	1	0.03	+	37.01	0.029
cell-cell signaling by wnt (GO:0198738)	270	3	0.66	+	4.52	0.0293
Wnt signaling pathway (GO:0016055)	270	3	0.66	+	4.52	0.0293
positive regulation of chromosome organization (GO:2001252)	108	2	0.27	+	7.54	0.0299
negative regulation of protein metabolic process (GO:0051248)	958	6	2.35	+	2.55	0.0299
negative regulation of intrinsic apoptotic signaling pathway (GO:2001243)	109	2	0.27	+	7.47	0.0304
negative regulation of cellular metabolic process (GO:0031324)	2587	12	6.35	+	1.89	0.0307
osteoblast differentiation (GO:0001649)	110	2	0.27	+	7.4	0.0309
leukotriene biosynthetic process (GO:0019370)	12	1	0.03	+	33.92	0.0314
sphingolipid mediated signaling pathway (GO:0090520)	12	1	0.03	+	33.92	0.0314
phagosome-lysosome fusion (GO:0090385)	12	1	0.03	+	33.92	0.0314
ether biosynthetic process (GO:1901503)	12	1	0.03	+	33.92	0.0314
regulation of cellular response to osmotic stress (GO:0106049)	12	1	0.03	+	33.92	0.0314
protein localization to site of double-strand break (GO:1990166)	12	1	0.03	+	33.92	0.0314
regulation of lymphoid progenitor cell differentiation (GO:1905456)	12	1	0.03	+	33.92	0.0314
regulation of establishment of protein localization to chromosome (GO:0070202)	12	1	0.03	+	33.92	0.0314
regulation of prostaglandin biosynthetic process (GO:0031392)	12	1	0.03	+	33.92	0.0314
cellular lipid biosynthetic process (GO:0097384)	12	1	0.03	+	33.92	0.0314
phosphatidylcholine catabolic process (GO:0034638)	12	1	0.03	+	33.92	0.0314
embryo development (GO:0009790)	1241	7	3.05	+	2.3	0.0318
synapse assembly (GO:0007416)	112	2	0.28	+	7.27	0.0319
regulation of actin filament organization (GO:0110053)	280	3	0.69	+	4.36	0.0321
positive regulation of cell cycle phase transition (GO:1901989)	115	2	0.28	+	7.08	0.0334
dTMP metabolic process (GO:0046073)	13	1	0.03	+	31.31	0.0338
protein localization to condensed chromosome (GO:1903083)	13	1	0.03	+	31.31	0.0338
DNA strand elongation involved in DNA replication (GO:0006271)	13	1	0.03	+	31.31	0.0338
meiotic spindle assembly (GO:0090306)	13	1	0.03	+	31.31	0.0338
tetrahydrofolate interconversion (GO:0035999)	13	1	0.03	+	31.31	0.0338
positive regulation of protein localization to chromosome, telomeric region (GO:1904816)	13	1	0.03	+	31.31	0.0338
regulation of GTP binding (GO:1904424)	13	1	0.03	+	31.31	0.0338
protein localization to kinetochore (GO:0034501)	13	1	0.03	+	31.31	0.0338
liver development (GO:0001889)	116	2	0.28	+	7.02	0.034
cell junction assembly (GO:0034329)	287	3	0.7	+	4.26	0.0342
regulation of protein localization (GO:0032880)	994	6	2.44	+	2.46	0.0349
chromatin remodeling (GO:0006338)	501	4	1.23	+	3.25	0.035
hepaticobiliary system development (GO:0061008)	119	2	0.29	+	6.84	0.0355
regulation of unsaturated fatty acid biosynthetic process (GO:2001279)	14	1	0.03	+	29.08	0.0361
female meiosis I (GO:0007144)	14	1	0.03	+	29.08	0.0361
female mating behavior (GO:0060180)	14	1	0.03	+	29.08	0.0361
regulation of exit from mitosis (GO:0007096)	14	1	0.03	+	29.08	0.0361
negative regulation of cGAS/STING signaling pathway (GO:0160049)	14	1	0.03	+	29.08	0.0361
positive regulation of DNA-templated DNA replication (GO:2000105)	14	1	0.03	+	29.08	0.0361
attachment of mitotic spindle microtubules to kinetochore (GO:0051315)	14	1	0.03	+	29.08	0.0361
cardiolipin metabolic process (GO:0032048)	14	1	0.03	+	29.08	0.0361
pyrimidine nucleoside monophosphate biosynthetic process (GO:0009130)	14	1	0.03	+	29.08	0.0361
regulation of skeletal muscle acetylcholine-gated channel clustering (GO:1904393)	14	1	0.03	+	29.08	0.0361
extraembryonic membrane development (GO:1903867)	14	1	0.03	+	29.08	0.0361
mitotic DNA replication (GO:1902969)	14	1	0.03	+	29.08	0.0361
positive regulation of mitotic metaphase/anaphase transition (GO:0045842)	14	1	0.03	+	29.08	0.0361
regulation of DNA biosynthetic process (GO:2000278)	121	2	0.3	+	6.73	0.0366
regulation of DNA replication (GO:0006275)	121	2	0.3	+	6.73	0.0366
response to abiotic stimulus (GO:0009628)	1007	6	2.47	+	2.43	0.0368
positive regulation of molecular function (GO:0044093)	1287	7	3.16	+	2.21	0.0377
actomyosin structure organization (GO:0031032)	123	2	0.3	+	6.62	0.0377
multicellular organism development (GO:0007275)	4310	17	10.59	+	1.61	0.038
ribosome localization (GO:0033750)	15	1	0.04	+	27.14	0.0385
positive regulation of osteoblast proliferation (GO:0033690)	15	1	0.04	+	27.14	0.0385
signal peptide processing (GO:0006465)	15	1	0.04	+	27.14	0.0385
positive regulation of glutamate secretion (GO:0014049)	15	1	0.04	+	27.14	0.0385
positive regulation of metaphase/anaphase transition of cell cycle (GO:1902101)	15	1	0.04	+	27.14	0.0385
negative regulation of cell division (GO:0051782)	15	1	0.04	+	27.14	0.0385
regulation of protein localization to chromosome, telomeric region (GO:1904814)	15	1	0.04	+	27.14	0.0385
somatic hypermutation of immunoglobulin genes (GO:0016446)	15	1	0.04	+	27.14	0.0385
ribosomal subunit export from nucleus (GO:0000054)	15	1	0.04	+	27.14	0.0385
negative regulation of microtubule polymerization (GO:0031115)	15	1	0.04	+	27.14	0.0385
positive regulation of macrophage derived foam cell differentiation (GO:0010744)	15	1	0.04	+	27.14	0.0385
high-density lipoprotein particle remodeling (GO:0034375)	15	1	0.04	+	27.14	0.0385
postsynapse organization (GO:0099173)	125	2	0.31	+	6.51	0.0388
protein localization to organelle (GO:0033365)	762	5	1.87	+	2.67	0.0393
regulation of cellular response to stress (GO:0080135)	521	4	1.28	+	3.13	0.0395
nervous system process (GO:0050877)	2224	1	5.46	-	0.18	0.04
developmental growth (GO:0048589)	525	4	1.29	+	3.1	0.0405
skin development (GO:0043588)	308	3	0.76	+	3.97	0.0407
triglyceride catabolic process (GO:0019433)	16	1	0.04	+	25.44	0.0409
hyperosmotic response (GO:0006972)	16	1	0.04	+	25.44	0.0409
somatic diversification of immune receptors via somatic mutation (GO:0002566)	16	1	0.04	+	25.44	0.0409
telomere maintenance via telomerase (GO:0007004)	16	1	0.04	+	25.44	0.0409
RNA-templated DNA biosynthetic process (GO:0006278)	16	1	0.04	+	25.44	0.0409
negative regulation of axon regeneration (GO:0048681)	16	1	0.04	+	25.44	0.0409
primary amino compound metabolic process (GO:1901160)	16	1	0.04	+	25.44	0.0409
mitotic intra-S DNA damage checkpoint signaling (GO:0031573)	16	1	0.04	+	25.44	0.0409
midbody abscission (GO:0061952)	16	1	0.04	+	25.44	0.0409
pyrimidine deoxyribonucleoside monophosphate metabolic process (GO:0009176)	16	1	0.04	+	25.44	0.0409
stabilization of membrane potential (GO:0030322)	16	1	0.04	+	25.44	0.0409
negative regulation of necroptotic process (GO:0060546)	16	1	0.04	+	25.44	0.0409
actin cytoskeleton organization (GO:0030036)	529	4	1.3	+	3.08	0.0414
regulation of double-strand break repair (GO:2000779)	130	2	0.32	+	6.26	0.0416
regulation of DNA recombination (GO:0000018)	130	2	0.32	+	6.26	0.0416
positive regulation of mitotic cell cycle (GO:0045931)	130	2	0.32	+	6.26	0.0416
growth (GO:0040007)	530	4	1.3	+	3.07	0.0417
regulation of systemic arterial blood pressure (GO:0003073)	131	2	0.32	+	6.22	0.0422
phagolysosome assembly (GO:0001845)	17	1	0.04	+	23.95	0.0432
phosphatidylcholine biosynthetic process (GO:0006656)	17	1	0.04	+	23.95	0.0432
cellular response to fluid shear stress (GO:0071498)	17	1	0.04	+	23.95	0.0432
resolution of meiotic recombination intermediates (GO:0000712)	17	1	0.04	+	23.95	0.0432
chaperone-mediated protein complex assembly (GO:0051131)	17	1	0.04	+	23.95	0.0432
2'-deoxyribonucleotide biosynthetic process (GO:0009265)	17	1	0.04	+	23.95	0.0432
deoxyribonucleotide biosynthetic process (GO:0009263)	17	1	0.04	+	23.95	0.0432
positive regulation of telomere capping (GO:1904355)	17	1	0.04	+	23.95	0.0432
positive regulation of Rac protein signal transduction (GO:0035022)	17	1	0.04	+	23.95	0.0432
negative regulation of B cell apoptotic process (GO:0002903)	17	1	0.04	+	23.95	0.0432
keratinocyte development (GO:0003334)	17	1	0.04	+	23.95	0.0432
deoxyribose phosphate biosynthetic process (GO:0046385)	17	1	0.04	+	23.95	0.0432
intestinal epithelial cell development (GO:0060576)	17	1	0.04	+	23.95	0.0432
nuclear export (GO:0051168)	133	2	0.33	+	6.12	0.0433
positive regulation of DNA metabolic process (GO:0051054)	319	3	0.78	+	3.83	0.0444
in utero embryonic development (GO:0001701)	543	4	1.33	+	3	0.0448
mitotic cell cycle phase transition (GO:0044772)	136	2	0.33	+	5.99	0.0451
regulation of Wnt signaling pathway (GO:0030111)	322	3	0.79	+	3.79	0.0454
negative regulation of ubiquitin-protein transferase activity (GO:0051444)	18	1	0.04	+	22.62	0.0456
myelin maintenance (GO:0043217)	18	1	0.04	+	22.62	0.0456
maternal behavior (GO:0042711)	18	1	0.04	+	22.62	0.0456
DNA replication checkpoint signaling (GO:0000076)	18	1	0.04	+	22.62	0.0456
positive regulation of receptor clustering (GO:1903911)	18	1	0.04	+	22.62	0.0456
negative regulation of programmed necrotic cell death (GO:0062099)	18	1	0.04	+	22.62	0.0456
regulation of type B pancreatic cell proliferation (GO:0061469)	18	1	0.04	+	22.62	0.0456
DNA strand elongation (GO:0022616)	18	1	0.04	+	22.62	0.0456
grooming behavior (GO:0007625)	18	1	0.04	+	22.62	0.0456
leukocyte chemotaxis (GO:0030595)	139	2	0.34	+	5.86	0.0469
RNA transport (GO:0050658)	140	2	0.34	+	5.82	0.0475
nucleic acid transport (GO:0050657)	140	2	0.34	+	5.82	0.0475
negative regulation of muscle tissue development (GO:1901862)	19	1	0.05	+	21.43	0.0479
protein kinase C signaling (GO:0070528)	19	1	0.05	+	21.43	0.0479
response to food (GO:0032094)	19	1	0.05	+	21.43	0.0479
regulation of response to osmotic stress (GO:0047484)	19	1	0.05	+	21.43	0.0479
trophoblast giant cell differentiation (GO:0060707)	19	1	0.05	+	21.43	0.0479
response to chemical (GO:0042221)	3896	4	9.57	-	0.42	0.0486
establishment of RNA localization (GO:0051236)	142	2	0.35	+	5.73	0.0487
response to light stimulus (GO:0009416)	332	3	0.82	+	3.68	0.0489

## Sheet: Supplementary File 3d
GO biological process complete	Mus musculus - REFLIST (21983)	Client Text Box Input (85)	Client Text Box Input (expected)	Client Text Box Input (over/under)	Client Text Box Input (fold Enrichment)	Client Text Box Input (raw P-value)
anatomical structure morphogenesis (GO:0009653)	2333	27	9.02	+	2.99	1.17e-07
extracellular matrix organization (GO:0030198)	278	10	1.07	+	9.3	1.62e-07
external encapsulating structure organization (GO:0045229)	279	10	1.08	+	9.27	1.67e-07
extracellular structure organization (GO:0043062)	280	10	1.08	+	9.24	1.73e-07
tube morphogenesis (GO:0035239)	756	15	2.92	+	5.13	2.28e-07
cell-matrix adhesion (GO:0007160)	132	7	0.51	+	13.71	1.11e-06
tube development (GO:0035295)	996	16	3.85	+	4.15	1.36e-06
system development (GO:0048731)	3519	32	13.61	+	2.35	1.59e-06
blood vessel morphogenesis (GO:0048514)	458	11	1.77	+	6.21	1.84e-06
animal organ development (GO:0048513)	2942	28	11.38	+	2.46	3.34e-06
regulation of cell-substrate adhesion (GO:0010810)	227	8	0.88	+	9.11	3.49e-06
circulatory system development (GO:0072359)	979	15	3.79	+	3.96	5.37e-06
cell-substrate adhesion (GO:0031589)	184	7	0.71	+	9.84	9.1e-06
cell adhesion (GO:0007155)	899	14	3.48	+	4.03	9.6e-06
regulation of anatomical structure morphogenesis (GO:0022603)	932	14	3.6	+	3.88	1.43e-05
multicellular organism development (GO:0007275)	4310	34	16.67	+	2.04	1.45e-05
blood vessel development (GO:0001568)	574	11	2.22	+	4.96	1.49e-05
animal organ morphogenesis (GO:0009887)	1074	15	4.15	+	3.61	1.59e-05
vasculature development (GO:0001944)	604	11	2.34	+	4.71	2.37e-05
developmental growth (GO:0048589)	525	10	2.03	+	4.93	3.96e-05
growth (GO:0040007)	530	10	2.05	+	4.88	4.28e-05
developmental process (GO:0032502)	5880	40	22.74	+	1.76	6.65e-05
cell-cell adhesion (GO:0098609)	459	9	1.77	+	5.07	7.94e-05
morphogenesis of a branching epithelium (GO:0061138)	200	6	0.77	+	7.76	0.000146
regulation of cell-matrix adhesion (GO:0001952)	127	5	0.49	+	10.18	0.000159
positive regulation of cellular process (GO:0048522)	5901	39	22.82	+	1.71	0.00019
morphogenesis of a branching structure (GO:0001763)	211	6	0.82	+	7.35	0.000193
regulation of angiogenesis (GO:0045765)	303	7	1.17	+	5.97	0.000195
regulation of vasculature development (GO:1901342)	310	7	1.2	+	5.84	0.000224
anatomical structure development (GO:0048856)	5507	37	21.29	+	1.74	0.000225
positive regulation of cell-substrate adhesion (GO:0010811)	139	5	0.54	+	9.3	0.000238
cell growth (GO:0016049)	139	5	0.54	+	9.3	0.000238
artery morphogenesis (GO:0048844)	75	4	0.29	+	13.79	0.000247
positive regulation of biological process (GO:0048518)	6391	41	24.71	+	1.66	0.00027
positive regulation of focal adhesion assembly (GO:0051894)	30	3	0.12	+	25.86	0.000277
cardiac chamber morphogenesis (GO:0003206)	147	5	0.57	+	8.8	0.000306
cardiac septum morphogenesis (GO:0060411)	81	4	0.31	+	12.77	0.000327
integrin-mediated signaling pathway (GO:0007229)	83	4	0.32	+	12.46	0.000358
angiogenesis (GO:0001525)	342	7	1.32	+	5.29	0.0004
negative regulation of peptidyl-cysteine S-nitrosylation (GO:1902083)	6	2	0.02	+	86.21	0.000404
regulation of cell adhesion (GO:0030155)	839	11	3.24	+	3.39	0.000411
positive regulation of cell-substrate junction organization (GO:0150117)	35	3	0.14	+	22.17	0.000422
developmental growth involved in morphogenesis (GO:0060560)	162	5	0.63	+	7.98	0.000471
neuron projection extension (GO:1990138)	90	4	0.35	+	11.49	0.00048
response to wounding (GO:0009611)	355	7	1.37	+	5.1	0.000497
branching morphogenesis of an epithelial tube (GO:0048754)	167	5	0.65	+	7.74	0.000538
epithelial tube morphogenesis (GO:0060562)	366	7	1.42	+	4.95	0.000594
regulation of peptidyl-cysteine S-nitrosylation (GO:2000169)	8	2	0.03	+	64.66	0.000647
trachea cartilage development (GO:0060534)	8	2	0.03	+	64.66	0.000647
tissue development (GO:0009888)	1849	17	7.15	+	2.38	0.000667
cell adhesion mediated by integrin (GO:0033627)	42	3	0.16	+	18.47	0.000696
skeletal system development (GO:0001501)	510	8	1.97	+	4.06	0.000863
regulation of axonogenesis (GO:0050770)	187	5	0.72	+	6.92	0.000884
tissue morphogenesis (GO:0048729)	642	9	2.48	+	3.63	0.000896
ventricular septum morphogenesis (GO:0060412)	47	3	0.18	+	16.51	0.000948
cardiac chamber development (GO:0003205)	195	5	0.75	+	6.63	0.00106
artery development (GO:0060840)	113	4	0.44	+	9.15	0.00109
peptidyl-proline hydroxylation to 4-hydroxy-L-proline (GO:0018401)	11	2	0.04	+	47.02	0.00111
retina vasculature morphogenesis in camera-type eye (GO:0061299)	11	2	0.04	+	47.02	0.00111
neuron development (GO:0048666)	949	11	3.67	+	3	0.00112
axon extension (GO:0048675)	51	3	0.2	+	15.21	0.00119
cellular process (GO:0009987)	15465	73	59.8	+	1.22	0.00119
response to stimulus (GO:0050896)	8811	49	34.07	+	1.44	0.00122
muscle structure development (GO:0061061)	541	8	2.09	+	3.82	0.00125
4-hydroxyproline metabolic process (GO:0019471)	12	2	0.05	+	43.1	0.00129
positive regulation of keratinocyte migration (GO:0051549)	13	2	0.05	+	39.79	0.00149
cardiac septum development (GO:0003279)	125	4	0.48	+	8.28	0.00157
regulation of fibroblast proliferation (GO:0048145)	126	4	0.49	+	8.21	0.00161
collagen fibril organization (GO:0030199)	57	3	0.22	+	13.61	0.00161
organic acid metabolic process (GO:0006082)	844	10	3.26	+	3.06	0.00162
axon development (GO:0061564)	437	7	1.69	+	4.14	0.00163
positive regulation of integrin-mediated signaling pathway (GO:2001046)	14	2	0.05	+	36.95	0.0017
peptidyl-proline hydroxylation (GO:0019511)	14	2	0.05	+	36.95	0.0017
regulation of body fluid levels (GO:0050878)	327	6	1.26	+	4.75	0.00182
anatomical structure formation involved in morphogenesis (GO:0048646)	1010	11	3.91	+	2.82	0.00183
sprouting angiogenesis (GO:0002040)	60	3	0.23	+	12.93	0.00185
regulation of neuron projection development (GO:0010975)	578	8	2.23	+	3.58	0.00189
developmental cell growth (GO:0048588)	132	4	0.51	+	7.84	0.0019
regulation of cell migration (GO:0030334)	1016	11	3.93	+	2.8	0.00192
heart trabecula formation (GO:0060347)	15	2	0.06	+	34.48	0.00192
regulation of keratinocyte migration (GO:0051547)	15	2	0.06	+	34.48	0.00192
cellular response to stimulus (GO:0051716)	6747	40	26.09	+	1.53	0.00198
response to stress (GO:0006950)	3310	24	12.8	+	1.88	0.00199
neuron differentiation (GO:0030182)	1183	12	4.57	+	2.62	0.00204
regulation of focal adhesion assembly (GO:0051893)	64	3	0.25	+	12.12	0.00221
regulation of cell-substrate junction assembly (GO:0090109)	64	3	0.25	+	12.12	0.00221
positive regulation of cell-matrix adhesion (GO:0001954)	65	3	0.25	+	11.94	0.00231
chaperone-mediated protein folding (GO:0061077)	65	3	0.25	+	11.94	0.00231
positive regulation of cell migration (GO:0030335)	600	8	2.32	+	3.45	0.00237
heart development (GO:0007507)	600	8	2.32	+	3.45	0.00237
response to lithium ion (GO:0010226)	17	2	0.07	+	30.43	0.0024
lung morphogenesis (GO:0060425)	66	3	0.26	+	11.76	0.00241
regulation of cell-substrate junction organization (GO:0150116)	69	3	0.27	+	11.24	0.00272
response to inorganic substance (GO:0010035)	482	7	1.86	+	3.76	0.0028
regulation of epithelial cell migration (GO:0010632)	247	5	0.96	+	5.24	0.00291
negative regulation of cell population proliferation (GO:0008285)	765	9	2.96	+	3.04	0.00293
regulation of cell motility (GO:2000145)	1075	11	4.16	+	2.65	0.00296
negative regulation of axonogenesis (GO:0050771)	72	3	0.28	+	10.78	0.00305
positive regulation of cell motility (GO:2000147)	629	8	2.43	+	3.29	0.00315
regulation of plasma membrane bounded cell projection organization (GO:0120035)	774	9	2.99	+	3.01	0.00316
cell migration involved in sprouting angiogenesis (GO:0002042)	20	2	0.08	+	25.86	0.00322
regulation of multicellular organismal process (GO:0051239)	3270	23	12.64	+	1.82	0.00337
sensory organ development (GO:0007423)	636	8	2.46	+	3.25	0.00337
wound healing (GO:0042060)	258	5	1	+	5.01	0.0035
generation of neurons (GO:0048699)	1268	12	4.9	+	2.45	0.00358
regulation of cell projection organization (GO:0031344)	789	9	3.05	+	2.95	0.00358
phosphate-containing compound metabolic process (GO:0006796)	1747	15	6.75	+	2.22	0.00364
coronary vasculature development (GO:0060976)	77	3	0.3	+	10.08	0.00366
positive regulation of locomotion (GO:0040017)	645	8	2.49	+	3.21	0.00367
positive regulation of cellular component organization (GO:0051130)	1272	12	4.92	+	2.44	0.00367
negative regulation of multicellular organismal process (GO:0051241)	1275	12	4.93	+	2.43	0.00374
positive regulation of fibroblast proliferation (GO:0048146)	78	3	0.3	+	9.95	0.00379
trachea development (GO:0060438)	22	2	0.09	+	23.51	0.00383
regulation of integrin-mediated signaling pathway (GO:2001044)	22	2	0.09	+	23.51	0.00383
positive regulation of cell migration involved in sprouting angiogenesis (GO:0090050)	22	2	0.09	+	23.51	0.00383
negative regulation of calcium-mediated signaling (GO:0050849)	22	2	0.09	+	23.51	0.00383
retina vasculature development in camera-type eye (GO:0061298)	22	2	0.09	+	23.51	0.00383
phosphorus metabolic process (GO:0006793)	1769	15	6.84	+	2.19	0.00392
endothelial cell migration (GO:0043542)	79	3	0.31	+	9.82	0.00392
positive regulation of epithelial cell migration (GO:0010634)	163	4	0.63	+	6.35	0.00398
regulation of locomotion (GO:0040012)	1119	11	4.33	+	2.54	0.004
regulation of phosphorylation (GO:0042325)	1123	11	4.34	+	2.53	0.0041
multicellular organismal process (GO:0032501)	7704	43	29.79	+	1.44	0.00412
axonogenesis (GO:0007409)	388	6	1.5	+	4	0.00417
nucleic acid metabolic process (GO:0090304)	2045	1	7.91	-	0.13	0.00429
ventricular septum development (GO:0003281)	82	3	0.32	+	9.46	0.00434
negative regulation of neuron projection development (GO:0010977)	168	4	0.65	+	6.16	0.00442
carboxylic acid metabolic process (GO:0019752)	817	9	3.16	+	2.85	0.00448
axonal fasciculation (GO:0007413)	24	2	0.09	+	21.55	0.00449
neuron projection fasciculation (GO:0106030)	24	2	0.09	+	21.55	0.00449
neuron projection morphogenesis (GO:0048812)	529	7	2.05	+	3.42	0.00463
morphogenesis of an epithelium (GO:0002009)	530	7	2.05	+	3.42	0.00468
regulation of multicellular organismal development (GO:2000026)	1592	14	6.16	+	2.27	0.00478
muscle tissue morphogenesis (GO:0060415)	85	3	0.33	+	9.13	0.00478
plasma membrane bounded cell projection morphogenesis (GO:0120039)	535	7	2.07	+	3.38	0.00492
heart morphogenesis (GO:0003007)	281	5	1.09	+	4.6	0.00498
trabecula formation (GO:0060343)	26	2	0.1	+	19.89	0.00519
smooth muscle tissue development (GO:0048745)	26	2	0.1	+	19.89	0.00519
oxoacid metabolic process (GO:0043436)	837	9	3.24	+	2.78	0.00523
positive regulation of angiogenesis (GO:0045766)	177	4	0.68	+	5.84	0.00529
cell projection morphogenesis (GO:0048858)	543	7	2.1	+	3.33	0.00532
protein hydroxylation (GO:0018126)	27	2	0.1	+	19.16	0.00556
secondary palate development (GO:0062009)	27	2	0.1	+	19.16	0.00556
positive regulation of vasculature development (GO:1904018)	180	4	0.7	+	5.75	0.0056
regulation of protein modification process (GO:0031399)	1347	12	5.21	+	2.3	0.00575
muscle organ morphogenesis (GO:0048644)	93	3	0.36	+	8.34	0.00609
cell differentiation (GO:0030154)	3847	25	14.87	+	1.68	0.0063
cellular developmental process (GO:0048869)	3848	25	14.88	+	1.68	0.00631
neuron projection regeneration (GO:0031102)	29	2	0.11	+	17.84	0.00634
cellular modified amino acid metabolic process (GO:0006575)	188	4	0.73	+	5.5	0.0065
cartilage development (GO:0051216)	189	4	0.73	+	5.47	0.00662
regulation of blood vessel endothelial cell migration (GO:0043535)	97	3	0.38	+	8	0.00682
regulation of developmental process (GO:0050793)	2646	19	10.23	+	1.86	0.00686
regulation of protein phosphorylation (GO:0001932)	1038	10	4.01	+	2.49	0.00693
regulation of the force of heart contraction (GO:0002026)	31	2	0.12	+	16.69	0.00716
positive regulation of phosphorylation (GO:0042327)	728	8	2.81	+	2.84	0.00742
muscle organ development (GO:0007517)	310	5	1.2	+	4.17	0.00743
coronary vasculature morphogenesis (GO:0060977)	32	2	0.12	+	16.16	0.00759
supramolecular fiber organization (GO:0097435)	582	7	2.25	+	3.11	0.00764
negative regulation of citrulline biosynthetic process (GO:1903249)	1	1	0	+	> 100	0.00769
regulation of citrulline biosynthetic process (GO:1903248)	1	1	0	+	> 100	0.00769
prostaglandin production involved in inflammatory response (GO:0002539)	1	1	0	+	> 100	0.00769
glucose 1-phosphate metabolic process (GO:0019255)	1	1	0	+	> 100	0.00769
negative regulation of amine catabolic process (GO:0033242)	1	1	0	+	> 100	0.00769
regulation of amine catabolic process (GO:0033241)	1	1	0	+	> 100	0.00769
positive regulation of glycine import across plasma membrane (GO:1900925)	1	1	0	+	> 100	0.00769
stilbene metabolic process (GO:0009810)	1	1	0	+	> 100	0.00769
negative regulation of the force of heart contraction (GO:0098736)	1	1	0	+	> 100	0.00769
negative regulation of CAMKK-AMPK signaling cascade (GO:1905290)	1	1	0	+	> 100	0.00769
positive regulation of epithelium regeneration (GO:1905043)	1	1	0	+	> 100	0.00769
positive regulation of leukotriene production involved in inflammatory response (GO:0035491)	1	1	0	+	> 100	0.00769
regulation of leukotriene production involved in inflammatory response (GO:0035490)	1	1	0	+	> 100	0.00769
negative regulation of arginine catabolic process (GO:1900082)	1	1	0	+	> 100	0.00769
regulation of arginine catabolic process (GO:1900081)	1	1	0	+	> 100	0.00769
renal artery morphogenesis (GO:0061441)	1	1	0	+	> 100	0.00769
cell migration involved in coronary vasculogenesis (GO:0060980)	1	1	0	+	> 100	0.00769
formaldehyde biosynthetic process (GO:0046293)	1	1	0	+	> 100	0.00769
stilbene catabolic process (GO:0046272)	1	1	0	+	> 100	0.00769
plasma membrane bounded cell projection organization (GO:0120036)	1225	11	4.74	+	2.32	0.00773
regulation of cell growth (GO:0001558)	445	6	1.72	+	3.49	0.00793
aorta morphogenesis (GO:0035909)	33	2	0.13	+	15.67	0.00803
vascular associated smooth muscle cell differentiation (GO:0035886)	33	2	0.13	+	15.67	0.00803
response to metal ion (GO:0010038)	317	5	1.23	+	4.08	0.00813
regulation of neuron apoptotic process (GO:0043523)	318	5	1.23	+	4.07	0.00823
canonical Wnt signaling pathway (GO:0060070)	105	3	0.41	+	7.39	0.00842
epithelial tube branching involved in lung morphogenesis (GO:0060441)	34	2	0.13	+	15.21	0.00848
kidney development (GO:0001822)	321	5	1.24	+	4.03	0.00855
regulation of cellular process (GO:0050794)	11558	57	44.69	+	1.28	0.00868
positive regulation of cell projection organization (GO:0031346)	458	6	1.77	+	3.39	0.00905
regulation of cell population proliferation (GO:0042127)	1786	14	6.91	+	2.03	0.0093
positive regulation of filopodium assembly (GO:0051491)	36	2	0.14	+	14.37	0.00942
small molecule metabolic process (GO:0044281)	1581	13	6.11	+	2.13	0.00946
cell morphogenesis (GO:0000902)	764	8	2.95	+	2.71	0.00975
heart trabecula morphogenesis (GO:0061384)	37	2	0.14	+	13.98	0.00991
cell surface receptor signaling pathway (GO:0007166)	1900	15	7.35	+	2.04	0.0101
regulation of apoptotic process (GO:0042981)	1604	13	6.2	+	2.1	0.0103
neuron projection development (GO:0031175)	771	8	2.98	+	2.68	0.0103
renal system development (GO:0072001)	337	5	1.3	+	3.84	0.0104
epithelial cell migration (GO:0010631)	114	3	0.44	+	6.81	0.0105
epithelium migration (GO:0090132)	116	3	0.45	+	6.69	0.011
cell migration (GO:0016477)	944	9	3.65	+	2.47	0.011
ameboidal-type cell migration (GO:0001667)	221	4	0.85	+	4.68	0.0112
positive regulation of plasma membrane bounded cell projection assembly (GO:0120034)	117	3	0.45	+	6.63	0.0112
regulation of cell migration involved in sprouting angiogenesis (GO:0090049)	40	2	0.15	+	12.93	0.0114
blood vessel endothelial cell migration (GO:0043534)	40	2	0.15	+	12.93	0.0114
regulation of biological process (GO:0050789)	12183	59	47.11	+	1.25	0.0115
vestibulocochlear nerve structural organization (GO:0021649)	2	1	0.01	+	> 100	0.0115
negative regulation of exo-alpha-sialidase activity (GO:1903016)	2	1	0.01	+	> 100	0.0115
regulation of exo-alpha-sialidase activity (GO:1903015)	2	1	0.01	+	> 100	0.0115
negative regulation of complement activation, lectin pathway (GO:0001869)	2	1	0.01	+	> 100	0.0115
regulation of complement activation, lectin pathway (GO:0001868)	2	1	0.01	+	> 100	0.0115
amino acid export across plasma membrane (GO:0032973)	2	1	0.01	+	> 100	0.0115
negative regulation by host of viral glycoprotein metabolic process (GO:0044871)	2	1	0.01	+	> 100	0.0115
modulation by host of viral glycoprotein metabolic process (GO:0044870)	2	1	0.01	+	> 100	0.0115
negative regulation by host of viral exo-alpha-sialidase activity (GO:0044869)	2	1	0.01	+	> 100	0.0115
modulation by host of viral catalytic activity (GO:0044867)	2	1	0.01	+	> 100	0.0115
modulation by host of viral exo-alpha-sialidase activity (GO:0044866)	2	1	0.01	+	> 100	0.0115
VEGF-activated neuropilin signaling pathway (GO:0038190)	2	1	0.01	+	> 100	0.0115
negative regulation of smooth muscle cell-matrix adhesion (GO:2000098)	2	1	0.01	+	> 100	0.0115
olefinic compound catabolic process (GO:0120256)	2	1	0.01	+	> 100	0.0115
negative regulation of ERBB4 signaling pathway (GO:0120154)	2	1	0.01	+	> 100	0.0115
dorsal root ganglion morphogenesis (GO:1904835)	2	1	0.01	+	> 100	0.0115
otic placode development (GO:1905040)	2	1	0.01	+	> 100	0.0115
negative regulation of odontogenesis of dentin-containing tooth (GO:0042489)	2	1	0.01	+	> 100	0.0115
ganglion morphogenesis (GO:0061552)	2	1	0.01	+	> 100	0.0115
smooth muscle cell-matrix adhesion (GO:0061302)	2	1	0.01	+	> 100	0.0115
lung smooth muscle development (GO:0061145)	2	1	0.01	+	> 100	0.0115
bronchus cartilage development (GO:0060532)	2	1	0.01	+	> 100	0.0115
negative regulation of biological process (GO:0048519)	5522	32	21.35	+	1.5	0.0117
tissue migration (GO:0090130)	119	3	0.46	+	6.52	0.0117
coagulation (GO:0050817)	119	3	0.46	+	6.52	0.0117
regeneration (GO:0031099)	119	3	0.46	+	6.52	0.0117
blood coagulation (GO:0007596)	119	3	0.46	+	6.52	0.0117
negative regulation of cell projection organization (GO:0031345)	225	4	0.87	+	4.6	0.0119
regulation of neurogenesis (GO:0050767)	487	6	1.88	+	3.19	0.012
branching involved in blood vessel morphogenesis (GO:0001569)	41	2	0.16	+	12.62	0.012
peptidyl-proline modification (GO:0018208)	41	2	0.16	+	12.62	0.012
brown fat cell differentiation (GO:0050873)	41	2	0.16	+	12.62	0.012
non-canonical Wnt signaling pathway (GO:0035567)	41	2	0.16	+	12.62	0.012
positive regulation of substrate adhesion-dependent cell spreading (GO:1900026)	41	2	0.16	+	12.62	0.012
cell morphogenesis involved in neuron differentiation (GO:0048667)	490	6	1.89	+	3.17	0.0123
regulation of programmed cell death (GO:0043067)	1655	13	6.4	+	2.03	0.0124
embryonic morphogenesis (GO:0048598)	640	7	2.47	+	2.83	0.0124
NADP metabolic process (GO:0006739)	42	2	0.16	+	12.32	0.0125
hemostasis (GO:0007599)	122	3	0.47	+	6.36	0.0125
carbohydrate biosynthetic process (GO:0016051)	123	3	0.48	+	6.31	0.0128
positive regulation of apoptotic process (GO:0043065)	645	7	2.49	+	2.81	0.0129
nicotinamide nucleotide metabolic process (GO:0046496)	124	3	0.48	+	6.26	0.0131
postsynapse organization (GO:0099173)	125	3	0.48	+	6.21	0.0133
neurogenesis (GO:0022008)	1460	12	5.65	+	2.13	0.0134
negative regulation of locomotion (GO:0040013)	360	5	1.39	+	3.59	0.0134
pyridine nucleotide metabolic process (GO:0019362)	126	3	0.49	+	6.16	0.0136
positive regulation of metabolic process (GO:0009893)	3808	24	14.72	+	1.63	0.0137
cell motility (GO:0048870)	1152	10	4.45	+	2.24	0.0137
cellular anatomical entity morphogenesis (GO:0032989)	654	7	2.53	+	2.77	0.0138
positive regulation of phosphorus metabolic process (GO:0010562)	821	8	3.17	+	2.52	0.0145
positive regulation of phosphate metabolic process (GO:0045937)	821	8	3.17	+	2.52	0.0145
regulation of extent of cell growth (GO:0061387)	130	3	0.5	+	5.97	0.0148
positive regulation of cell junction assembly (GO:1901890)	131	3	0.51	+	5.92	0.0151
regulation of wound healing (GO:0061041)	131	3	0.51	+	5.92	0.0151
biological_process (GO:0008150)	20747	85	80.22	+	1.06	0.0151
negative regulation of cellular amino acid metabolic process (GO:0045763)	3	1	0.01	+	86.21	0.0153
arachidonic acid metabolite production involved in inflammatory response (GO:0002538)	3	1	0.01	+	86.21	0.0153
negative regulation of animal organ morphogenesis (GO:0110111)	3	1	0.01	+	86.21	0.0153
modulation by host of viral molecular function (GO:0044868)	3	1	0.01	+	86.21	0.0153
negative regulation by host of symbiont catalytic activity (GO:0052403)	3	1	0.01	+	86.21	0.0153
regulation of proline transport (GO:0070881)	3	1	0.01	+	86.21	0.0153
regulation of glycine import across plasma membrane (GO:1900923)	3	1	0.01	+	86.21	0.0153
UDP-glucose metabolic process (GO:0006011)	3	1	0.01	+	86.21	0.0153
regulation of epithelium regeneration (GO:1905041)	3	1	0.01	+	86.21	0.0153
10-formyltetrahydrofolate catabolic process (GO:0009258)	3	1	0.01	+	86.21	0.0153
dendrite regeneration (GO:0031104)	3	1	0.01	+	86.21	0.0153
negative regulation of odontogenesis (GO:0042483)	3	1	0.01	+	86.21	0.0153
basal dendrite arborization (GO:0150020)	3	1	0.01	+	86.21	0.0153
basal dendrite morphogenesis (GO:0150019)	3	1	0.01	+	86.21	0.0153
basal dendrite development (GO:0150018)	3	1	0.01	+	86.21	0.0153
negative regulation of nitric oxide mediated signal transduction (GO:0010751)	3	1	0.01	+	86.21	0.0153
sensory neuron axon guidance (GO:0097374)	3	1	0.01	+	86.21	0.0153
dermatan sulfate biosynthetic process (GO:0030208)	3	1	0.01	+	86.21	0.0153
negative regulation of cholangiocyte proliferation (GO:1904055)	3	1	0.01	+	86.21	0.0153
facioacoustic ganglion development (GO:1903375)	3	1	0.01	+	86.21	0.0153
oxygen metabolic process (GO:0072592)	3	1	0.01	+	86.21	0.0153
regulation of growth (GO:0040008)	668	7	2.58	+	2.71	0.0153
positive regulation of programmed cell death (GO:0043068)	668	7	2.58	+	2.71	0.0153
cellular senescence (GO:0090398)	47	2	0.18	+	11.01	0.0153
positive regulation of cellular metabolic process (GO:0031325)	3427	22	13.25	+	1.66	0.0154
embryonic organ development (GO:0048568)	520	6	2.01	+	2.98	0.016
pyridine-containing compound metabolic process (GO:0072524)	135	3	0.52	+	5.75	0.0163
cell projection organization (GO:0030030)	1280	11	4.95	+	2.22	0.0164
regulation of cell adhesion mediated by integrin (GO:0033628)	49	2	0.19	+	10.56	0.0165
neuron recognition (GO:0008038)	49	2	0.19	+	10.56	0.0165
muscle tissue development (GO:0060537)	380	5	1.47	+	3.4	0.0166
positive regulation of protein phosphorylation (GO:0001934)	679	7	2.63	+	2.67	0.0166
regulation of response to stimulus (GO:0048583)	4094	25	15.83	+	1.58	0.0167
regulation of cellular component organization (GO:0051128)	2595	18	10.03	+	1.79	0.0167
negative regulation of developmental process (GO:0051093)	1015	9	3.92	+	2.29	0.0169
cellular component organization (GO:0016043)	5478	31	21.18	+	1.46	0.017
regulation of phosphate metabolic process (GO:0019220)	1296	11	5.01	+	2.2	0.017
regulation of phosphorus metabolic process (GO:0051174)	1297	11	5.02	+	2.19	0.017
positive regulation of calcium ion transport (GO:0051928)	138	3	0.53	+	5.62	0.0172
connective tissue development (GO:0061448)	253	4	0.98	+	4.09	0.0174
long-chain fatty acid transport (GO:0015909)	51	2	0.2	+	10.14	0.0178
cellular component organization or biogenesis (GO:0071840)	5691	32	22	+	1.45	0.0179
positive regulation of cell adhesion (GO:0045785)	535	6	2.07	+	2.9	0.0181
trabecula morphogenesis (GO:0061383)	52	2	0.2	+	9.95	0.0184
smooth muscle cell differentiation (GO:0051145)	53	2	0.2	+	9.76	0.0191
aorta smooth muscle tissue morphogenesis (GO:0060414)	4	1	0.02	+	64.66	0.0191
Wnt signaling pathway, calcium modulating pathway (GO:0007223)	4	1	0.02	+	64.66	0.0191
negative regulation of cell proliferation involved in contact inhibition (GO:0060244)	4	1	0.02	+	64.66	0.0191
neuropilin signaling pathway (GO:0038189)	4	1	0.02	+	64.66	0.0191
modulation by host of symbiont catalytic activity (GO:0052422)	4	1	0.02	+	64.66	0.0191
cholangiocyte proliferation (GO:1990705)	4	1	0.02	+	64.66	0.0191
ovarian cumulus expansion (GO:0001550)	4	1	0.02	+	64.66	0.0191
calcium ion export (GO:1901660)	4	1	0.02	+	64.66	0.0191
regulation of arginine metabolic process (GO:0000821)	4	1	0.02	+	64.66	0.0191
adrenomedullin receptor signaling pathway (GO:1990410)	4	1	0.02	+	64.66	0.0191
unidimensional cell growth (GO:0009826)	4	1	0.02	+	64.66	0.0191
ventral trunk neural crest cell migration (GO:0036486)	4	1	0.02	+	64.66	0.0191
cell migration involved in vasculogenesis (GO:0035441)	4	1	0.02	+	64.66	0.0191
negative regulation of IRE1-mediated unfolded protein response (GO:1903895)	4	1	0.02	+	64.66	0.0191
sympathetic neuron projection guidance (GO:0097491)	4	1	0.02	+	64.66	0.0191
opsonization (GO:0008228)	4	1	0.02	+	64.66	0.0191
epoxide metabolic process (GO:0097176)	4	1	0.02	+	64.66	0.0191
protein localization to early endosome (GO:1902946)	4	1	0.02	+	64.66	0.0191
positive regulation of protein folding (GO:1903334)	4	1	0.02	+	64.66	0.0191
trachea cartilage morphogenesis (GO:0060535)	4	1	0.02	+	64.66	0.0191
respiratory system development (GO:0060541)	261	4	1.01	+	3.96	0.0193
fat cell differentiation (GO:0045444)	145	3	0.56	+	5.35	0.0196
cell recognition (GO:0008037)	145	3	0.56	+	5.35	0.0196
positive regulation of protein modification process (GO:0031401)	869	8	3.36	+	2.38	0.0197
positive regulation of axon extension (GO:0045773)	54	2	0.21	+	9.58	0.0197
morphogenesis of an epithelial sheet (GO:0002011)	54	2	0.21	+	9.58	0.0197
cardiac ventricle development (GO:0003231)	146	3	0.56	+	5.31	0.0199
dendrite development (GO:0016358)	147	3	0.57	+	5.28	0.0203
regulation of filopodium assembly (GO:0051489)	55	2	0.21	+	9.4	0.0204
regulation of protein metabolic process (GO:0051246)	2326	16	8.99	+	1.78	0.0205
eye development (GO:0001654)	403	5	1.56	+	3.21	0.0207
visual system development (GO:0150063)	406	5	1.57	+	3.19	0.0213
peptidyl-amino acid modification (GO:0018193)	556	6	2.15	+	2.79	0.0214
cell-cell signaling by wnt (GO:0198738)	270	4	1.04	+	3.83	0.0215
Wnt signaling pathway (GO:0016055)	270	4	1.04	+	3.83	0.0215
organophosphate metabolic process (GO:0019637)	887	8	3.43	+	2.33	0.0219
sensory system development (GO:0048880)	410	5	1.59	+	3.15	0.0221
trigeminal nerve structural organization (GO:0021637)	5	1	0.02	+	51.72	0.0229
trigeminal nerve morphogenesis (GO:0021636)	5	1	0.02	+	51.72	0.0229
negative regulation of adenylate cyclase-activating adrenergic receptor signaling pathway (GO:0071878)	5	1	0.02	+	51.72	0.0229
soft palate development (GO:0060023)	5	1	0.02	+	51.72	0.0229
positive regulation of cAMP-dependent protein kinase activity (GO:2000481)	5	1	0.02	+	51.72	0.0229
regulation of Rho-dependent protein serine/threonine kinase activity (GO:2000298)	5	1	0.02	+	51.72	0.0229
response to hydrostatic pressure (GO:0051599)	5	1	0.02	+	51.72	0.0229
regulation of smooth muscle cell-matrix adhesion (GO:2000097)	5	1	0.02	+	51.72	0.0229
peptidyl-lysine oxidation (GO:0018057)	5	1	0.02	+	51.72	0.0229
retrograde trans-synaptic signaling by trans-synaptic protein complex (GO:0098942)	5	1	0.02	+	51.72	0.0229
dermatan sulfate proteoglycan biosynthetic process (GO:0050651)	5	1	0.02	+	51.72	0.0229
regulation of CAMKK-AMPK signaling cascade (GO:1905289)	5	1	0.02	+	51.72	0.0229
phosphatidylserine acyl-chain remodeling (GO:0036150)	5	1	0.02	+	51.72	0.0229
folic acid-containing compound catabolic process (GO:0009397)	5	1	0.02	+	51.72	0.0229
pteridine-containing compound catabolic process (GO:0042560)	5	1	0.02	+	51.72	0.0229
trigeminal ganglion development (GO:0061551)	5	1	0.02	+	51.72	0.0229
susceptibility to natural killer cell mediated cytotoxicity (GO:0042271)	5	1	0.02	+	51.72	0.0229
dentinogenesis (GO:0097187)	5	1	0.02	+	51.72	0.0229
dichotomous subdivision of terminal units involved in salivary gland branching (GO:0060666)	5	1	0.02	+	51.72	0.0229
negative regulation of vascular wound healing (GO:0061044)	5	1	0.02	+	51.72	0.0229
muscular septum morphogenesis (GO:0003150)	5	1	0.02	+	51.72	0.0229
formaldehyde metabolic process (GO:0046292)	5	1	0.02	+	51.72	0.0229
positive regulation of macrophage fusion (GO:0034241)	5	1	0.02	+	51.72	0.0229
monocarboxylic acid metabolic process (GO:0032787)	565	6	2.18	+	2.75	0.0229
regulation of neuron migration (GO:2001222)	59	2	0.23	+	8.77	0.0232
regulation of endothelial cell apoptotic process (GO:2000351)	59	2	0.23	+	8.77	0.0232
positive regulation of blood vessel endothelial cell migration (GO:0043536)	59	2	0.23	+	8.77	0.0232
regulation of substrate adhesion-dependent cell spreading (GO:1900024)	59	2	0.23	+	8.77	0.0232
platelet activation (GO:0030168)	59	2	0.23	+	8.77	0.0232
cell junction organization (GO:0034330)	571	6	2.21	+	2.72	0.024
negative regulation of cell-substrate adhesion (GO:0010812)	61	2	0.24	+	8.48	0.0246
labyrinthine layer development (GO:0060711)	61	2	0.24	+	8.48	0.0246
photoreceptor cell development (GO:0042461)	62	2	0.24	+	8.34	0.0253
regulation of response to stress (GO:0080134)	1433	11	5.54	+	1.99	0.0256
smooth muscle contraction (GO:0006939)	63	2	0.24	+	8.21	0.0261
positive regulation of protein localization to plasma membrane (GO:1903078)	63	2	0.24	+	8.21	0.0261
regulation of cardiac muscle cell apoptotic process (GO:0010665)	63	2	0.24	+	8.21	0.0261
neuron migration (GO:0001764)	163	3	0.63	+	4.76	0.0264
branchiomotor neuron axon guidance (GO:0021785)	6	1	0.02	+	43.1	0.0267
cell-cell adhesion mediated by integrin (GO:0033631)	6	1	0.02	+	43.1	0.0267
vestibulocochlear nerve morphogenesis (GO:0021648)	6	1	0.02	+	43.1	0.0267
spermatid nucleus elongation (GO:0007290)	6	1	0.02	+	43.1	0.0267
G protein-coupled receptor signaling pathway coupled to cGMP nucleotide second messenger (GO:0007199)	6	1	0.02	+	43.1	0.0267
dorsal root ganglion development (GO:1990791)	6	1	0.02	+	43.1	0.0267
trunk neural crest cell migration (GO:0036484)	6	1	0.02	+	43.1	0.0267
N-acylethanolamine metabolic process (GO:0070291)	6	1	0.02	+	43.1	0.0267
negative regulation of nitric-oxide synthase activity (GO:0051001)	6	1	0.02	+	43.1	0.0267
fused antrum stage (GO:0048165)	6	1	0.02	+	43.1	0.0267
10-formyltetrahydrofolate metabolic process (GO:0009256)	6	1	0.02	+	43.1	0.0267
positive regulation of Schwann cell migration (GO:1900149)	6	1	0.02	+	43.1	0.0267
calcium-independent cell-cell adhesion via plasma membrane cell-adhesion molecules (GO:0016338)	6	1	0.02	+	43.1	0.0267
cranial ganglion development (GO:0061550)	6	1	0.02	+	43.1	0.0267
trunk segmentation (GO:0035290)	6	1	0.02	+	43.1	0.0267
sympathetic neuron projection extension (GO:0097490)	6	1	0.02	+	43.1	0.0267
regulation of macrophage fusion (GO:0034239)	6	1	0.02	+	43.1	0.0267
negative regulation of G protein-coupled receptor signaling pathway (GO:0045744)	64	2	0.25	+	8.08	0.0268
positive regulation of wound healing (GO:0090303)	64	2	0.25	+	8.08	0.0268
regulation of nervous system development (GO:0051960)	588	6	2.27	+	2.64	0.0271
biological regulation (GO:0065007)	12576	59	48.63	+	1.21	0.0275
negative regulation of wound healing (GO:0061045)	65	2	0.25	+	7.96	0.0276
plasma membrane bounded cell projection assembly (GO:0120031)	438	5	1.69	+	2.95	0.0283
regulation of extracellular matrix organization (GO:1903053)	66	2	0.26	+	7.84	0.0283
regulation of striated muscle cell apoptotic process (GO:0010662)	66	2	0.26	+	7.84	0.0283
regulation of extrinsic apoptotic signaling pathway (GO:2001236)	168	3	0.65	+	4.62	0.0284
protein folding (GO:0006457)	168	3	0.65	+	4.62	0.0284
lipid modification (GO:0030258)	169	3	0.65	+	4.59	0.0289
bone mineralization (GO:0030282)	67	2	0.26	+	7.72	0.0291
regulation of blood coagulation (GO:0030193)	67	2	0.26	+	7.72	0.0291
aorta development (GO:0035904)	68	2	0.26	+	7.61	0.0299
negative regulation of signaling (GO:0023057)	1477	11	5.71	+	1.93	0.0299
retina development in camera-type eye (GO:0060041)	172	3	0.67	+	4.51	0.0302
negative regulation of cardiac muscle hypertrophy in response to stress (GO:1903243)	7	1	0.03	+	36.95	0.0304
lung growth (GO:0060437)	7	1	0.03	+	36.95	0.0304
negative regulation of hepatocyte proliferation (GO:2000346)	7	1	0.03	+	36.95	0.0304
regulation protein catabolic process at postsynapse (GO:0140252)	7	1	0.03	+	36.95	0.0304
positive regulation of axon extension involved in axon guidance (GO:0048842)	7	1	0.03	+	36.95	0.0304
regulation of Cdc42 protein signal transduction (GO:0032489)	7	1	0.03	+	36.95	0.0304
regulation of glutamine family amino acid metabolic process (GO:0000820)	7	1	0.03	+	36.95	0.0304
intracellular oxygen homeostasis (GO:0032364)	7	1	0.03	+	36.95	0.0304
positive regulation of odontoblast differentiation (GO:1901331)	7	1	0.03	+	36.95	0.0304
neural crest cell migration involved in autonomic nervous system development (GO:1901166)	7	1	0.03	+	36.95	0.0304
N-acylphosphatidylethanolamine metabolic process (GO:0070292)	7	1	0.03	+	36.95	0.0304
phosphatidylethanolamine acyl-chain remodeling (GO:0036152)	7	1	0.03	+	36.95	0.0304
kidney vasculature morphogenesis (GO:0061439)	7	1	0.03	+	36.95	0.0304
renal system vasculature morphogenesis (GO:0061438)	7	1	0.03	+	36.95	0.0304
angiogenesis involved in coronary vascular morphogenesis (GO:0060978)	7	1	0.03	+	36.95	0.0304
regulation of cholangiocyte proliferation (GO:1904054)	7	1	0.03	+	36.95	0.0304
monocyte activation (GO:0042117)	7	1	0.03	+	36.95	0.0304
hypothalamic tangential migration using cell-axon interactions (GO:0021856)	7	1	0.03	+	36.95	0.0304
gonadotrophin-releasing hormone neuronal migration to the hypothalamus (GO:0021828)	7	1	0.03	+	36.95	0.0304
regulation of hemostasis (GO:1900046)	69	2	0.27	+	7.5	0.0307
cell projection assembly (GO:0030031)	451	5	1.74	+	2.87	0.0315
negative regulation of neurogenesis (GO:0050768)	175	3	0.68	+	4.43	0.0315
regulation of endothelial cell migration (GO:0010594)	175	3	0.68	+	4.43	0.0315
regulation of response to wounding (GO:1903034)	176	3	0.68	+	4.41	0.0319
G protein-coupled receptor signaling pathway (GO:0007186)	1904	2	7.36	-	0.27	0.0326
regulation of coagulation (GO:0050818)	72	2	0.28	+	7.18	0.0331
positive regulation of peptidyl-tyrosine phosphorylation (GO:0050731)	180	3	0.7	+	4.31	0.0338
non-proteinogenic amino acid metabolic process (GO:0170041)	73	2	0.28	+	7.09	0.0339
substrate-dependent cell migration, cell extension (GO:0006930)	8	1	0.03	+	32.33	0.0341
positive regulation of transcription by glucose (GO:0046016)	8	1	0.03	+	32.33	0.0341
contact inhibition (GO:0060242)	8	1	0.03	+	32.33	0.0341
negative regulation of amine metabolic process (GO:0033239)	8	1	0.03	+	32.33	0.0341
cellular hypotonic response (GO:0071476)	8	1	0.03	+	32.33	0.0341
dorsal aorta morphogenesis (GO:0035912)	8	1	0.03	+	32.33	0.0341
hepatocyte growth factor receptor signaling pathway (GO:0048012)	8	1	0.03	+	32.33	0.0341
proline transmembrane transport (GO:0035524)	8	1	0.03	+	32.33	0.0341
calcitonin family receptor signaling pathway (GO:0097646)	8	1	0.03	+	32.33	0.0341
regulation of IRE1-mediated unfolded protein response (GO:1903894)	8	1	0.03	+	32.33	0.0341
negative regulation of plasminogen activation (GO:0010757)	8	1	0.03	+	32.33	0.0341
folic acid metabolic process (GO:0046655)	8	1	0.03	+	32.33	0.0341
negative regulation of cardiac muscle adaptation (GO:0010616)	8	1	0.03	+	32.33	0.0341
positive regulation of neuroepithelial cell differentiation (GO:1902913)	8	1	0.03	+	32.33	0.0341
sensory organ morphogenesis (GO:0090596)	313	4	1.21	+	3.31	0.0342
placenta development (GO:0001890)	182	3	0.7	+	4.26	0.0347
regulation of nitric oxide biosynthetic process (GO:0045428)	74	2	0.29	+	6.99	0.0348
negative regulation of cell migration (GO:0030336)	315	4	1.22	+	3.28	0.0348
negative regulation of nervous system development (GO:0051961)	183	3	0.71	+	4.24	0.0352
regulation of stem cell population maintenance (GO:2000036)	75	2	0.29	+	6.9	0.0356
positive regulation of protein localization to cell periphery (GO:1904377)	75	2	0.29	+	6.9	0.0356
cardiac muscle cell development (GO:0055013)	76	2	0.29	+	6.81	0.0365
cellular response to xenobiotic stimulus (GO:0071466)	187	3	0.72	+	4.15	0.0371
regulation of nitric oxide metabolic process (GO:0080164)	77	2	0.3	+	6.72	0.0373
positive regulation of neurogenesis (GO:0050769)	323	4	1.25	+	3.2	0.0376
negative regulation of cellular process (GO:0048523)	5040	28	19.49	+	1.44	0.0377
tangential migration from the subventricular zone to the olfactory bulb (GO:0022028)	9	1	0.03	+	28.74	0.0379
response to manganese ion (GO:0010042)	9	1	0.03	+	28.74	0.0379
detection of cell density (GO:0060245)	9	1	0.03	+	28.74	0.0379
NADPH oxidation (GO:0070995)	9	1	0.03	+	28.74	0.0379
Cdc42 protein signal transduction (GO:0032488)	9	1	0.03	+	28.74	0.0379
negative regulation of amyloid-beta clearance (GO:1900222)	9	1	0.03	+	28.74	0.0379
sympathetic ganglion development (GO:0061549)	9	1	0.03	+	28.74	0.0379
dermatan sulfate metabolic process (GO:0030205)	9	1	0.03	+	28.74	0.0379
carbon catabolite activation of transcription (GO:0045991)	9	1	0.03	+	28.74	0.0379
lymphocyte migration into lymphoid organs (GO:0097021)	9	1	0.03	+	28.74	0.0379
hypothalamus gonadotrophin-releasing hormone neuron development (GO:0021888)	9	1	0.03	+	28.74	0.0379
hypothalamus gonadotrophin-releasing hormone neuron differentiation (GO:0021886)	9	1	0.03	+	28.74	0.0379
hypothalamus cell migration (GO:0021855)	9	1	0.03	+	28.74	0.0379
endothelial cell apoptotic process (GO:0072577)	9	1	0.03	+	28.74	0.0379
muscle cell development (GO:0055001)	189	3	0.73	+	4.11	0.0381
photoreceptor cell differentiation (GO:0046530)	78	2	0.3	+	6.63	0.0382
negative regulation of cell motility (GO:2000146)	328	4	1.27	+	3.15	0.0394
regulation of signal transduction (GO:0009966)	3065	19	11.85	+	1.6	0.0395
regulation of response to endoplasmic reticulum stress (GO:1905897)	80	2	0.31	+	6.47	0.0399
nervous system development (GO:0007399)	2096	14	8.1	+	1.73	0.0399
embryonic organ morphogenesis (GO:0048562)	330	4	1.28	+	3.13	0.0402
positive regulation of response to wounding (GO:1903036)	81	2	0.31	+	6.39	0.0408
dendrite morphogenesis (GO:0048813)	81	2	0.31	+	6.39	0.0408
negative regulation of signal transduction (GO:0009968)	1355	10	5.24	+	1.91	0.041
bronchus development (GO:0060433)	10	1	0.04	+	25.86	0.0416
hypotonic response (GO:0006971)	10	1	0.04	+	25.86	0.0416
facial nerve structural organization (GO:0021612)	10	1	0.04	+	25.86	0.0416
cellular response to epinephrine stimulus (GO:0071872)	10	1	0.04	+	25.86	0.0416
response to epinephrine (GO:0071871)	10	1	0.04	+	25.86	0.0416
vestibulocochlear nerve development (GO:0021562)	10	1	0.04	+	25.86	0.0416
hard palate development (GO:0060022)	10	1	0.04	+	25.86	0.0416
glomerular basement membrane development (GO:0032836)	10	1	0.04	+	25.86	0.0416
negative regulation of fibrinolysis (GO:0051918)	10	1	0.04	+	25.86	0.0416
negative regulation of monooxygenase activity (GO:0032769)	10	1	0.04	+	25.86	0.0416
regulation protein catabolic process at synapse (GO:0140250)	10	1	0.04	+	25.86	0.0416
extracellular vesicle biogenesis (GO:0140112)	10	1	0.04	+	25.86	0.0416
inositol metabolic process (GO:0006020)	10	1	0.04	+	25.86	0.0416
retrograde trans-synaptic signaling (GO:0098917)	10	1	0.04	+	25.86	0.0416
negative regulation of collateral sprouting (GO:0048671)	10	1	0.04	+	25.86	0.0416
dorsal aorta development (GO:0035907)	10	1	0.04	+	25.86	0.0416
negative regulation of cellular response to oxidative stress (GO:1900408)	10	1	0.04	+	25.86	0.0416
endothelial cell chemotaxis (GO:0035767)	10	1	0.04	+	25.86	0.0416
ethanolamine-containing compound metabolic process (GO:0042439)	10	1	0.04	+	25.86	0.0416
coronary artery morphogenesis (GO:0060982)	10	1	0.04	+	25.86	0.0416
carbon catabolite regulation of transcription (GO:0045990)	10	1	0.04	+	25.86	0.0416
regulation of protein folding (GO:1903332)	10	1	0.04	+	25.86	0.0416
membranous septum morphogenesis (GO:0003149)	10	1	0.04	+	25.86	0.0416
diaphragm development (GO:0060539)	10	1	0.04	+	25.86	0.0416
positive regulation of endocytosis (GO:0045807)	200	3	0.77	+	3.88	0.0437
phospholipid metabolic process (GO:0006644)	340	4	1.31	+	3.04	0.0439
muscle contraction (GO:0006936)	201	3	0.78	+	3.86	0.0443
cardiac cell development (GO:0055006)	85	2	0.33	+	6.09	0.0444
RNA metabolic process (GO:0016070)	1453	1	5.62	-	0.18	0.0447
regulation of cardiac muscle hypertrophy in response to stress (GO:1903242)	11	1	0.04	+	23.51	0.0453
negative regulation of cell adhesion mediated by integrin (GO:0033629)	11	1	0.04	+	23.51	0.0453
integrin activation (GO:0033622)	11	1	0.04	+	23.51	0.0453
axonogenesis involved in innervation (GO:0060385)	11	1	0.04	+	23.51	0.0453
cardiac muscle cell myoblast differentiation (GO:0060379)	11	1	0.04	+	23.51	0.0453
positive regulation of vasculogenesis (GO:2001214)	11	1	0.04	+	23.51	0.0453
trigeminal nerve development (GO:0021559)	11	1	0.04	+	23.51	0.0453
regulation of basement membrane organization (GO:0110011)	11	1	0.04	+	23.51	0.0453
neuron projection extension involved in neuron projection guidance (GO:1902284)	11	1	0.04	+	23.51	0.0453
antral ovarian follicle growth (GO:0001547)	11	1	0.04	+	23.51	0.0453
axon extension involved in axon guidance (GO:0048846)	11	1	0.04	+	23.51	0.0453
negative regulation of dendrite development (GO:2000171)	11	1	0.04	+	23.51	0.0453
trans-synaptic signaling by trans-synaptic complex (GO:0099545)	11	1	0.04	+	23.51	0.0453
regulation of odontoblast differentiation (GO:1901329)	11	1	0.04	+	23.51	0.0453
maintenance of postsynaptic specialization structure (GO:0098880)	11	1	0.04	+	23.51	0.0453
bleb assembly (GO:0032060)	11	1	0.04	+	23.51	0.0453
positive regulation of insulin-like growth factor receptor signaling pathway (GO:0043568)	11	1	0.04	+	23.51	0.0453
dermatan sulfate proteoglycan metabolic process (GO:0050655)	11	1	0.04	+	23.51	0.0453
cellular response to potassium ion (GO:0035865)	11	1	0.04	+	23.51	0.0453
response to water (GO:0009415)	11	1	0.04	+	23.51	0.0453
regulation of Schwann cell migration (GO:1900147)	11	1	0.04	+	23.51	0.0453
L-alanine transport (GO:0015808)	11	1	0.04	+	23.51	0.0453
negative regulation of centrosome duplication (GO:0010826)	11	1	0.04	+	23.51	0.0453
negative regulation of centrosome cycle (GO:0046606)	11	1	0.04	+	23.51	0.0453
dichotomous subdivision of an epithelial terminal unit (GO:0060600)	11	1	0.04	+	23.51	0.0453
regulation of vascular wound healing (GO:0061043)	11	1	0.04	+	23.51	0.0453
fatty acid transport (GO:0015908)	86	2	0.33	+	6.01	0.0453
negative regulation of cell communication (GO:0010648)	1480	11	5.72	+	1.92	0.0462
negative regulation of cell growth (GO:0030308)	205	3	0.79	+	3.78	0.0464
outflow tract morphogenesis (GO:0003151)	88	2	0.34	+	5.88	0.0472
response to hypoxia (GO:0001666)	207	3	0.8	+	3.75	0.0475
negative regulation of response to wounding (GO:1903035)	89	2	0.34	+	5.81	0.0482
positive regulation of multicellular organismal process (GO:0051240)	1890	13	7.31	+	1.78	0.0488
trachea morphogenesis (GO:0060439)	12	1	0.05	+	21.55	0.0489
facial nerve morphogenesis (GO:0021610)	12	1	0.05	+	21.55	0.0489
regulation of transcription by glucose (GO:0046015)	12	1	0.05	+	21.55	0.0489
facial nerve development (GO:0021561)	12	1	0.05	+	21.55	0.0489
collagen-activated tyrosine kinase receptor signaling pathway (GO:0038063)	12	1	0.05	+	21.55	0.0489
replicative senescence (GO:0090399)	12	1	0.05	+	21.55	0.0489
regulation of oligodendrocyte progenitor proliferation (GO:0070445)	12	1	0.05	+	21.55	0.0489
primitive streak formation (GO:0090009)	12	1	0.05	+	21.55	0.0489
toxin metabolic process (GO:0009404)	12	1	0.05	+	21.55	0.0489
membrane protein intracellular domain proteolysis (GO:0031293)	12	1	0.05	+	21.55	0.0489
proline transport (GO:0015824)	12	1	0.05	+	21.55	0.0489
regulation of cardiac muscle adaptation (GO:0010612)	12	1	0.05	+	21.55	0.0489
urinary bladder smooth muscle contraction (GO:0014832)	12	1	0.05	+	21.55	0.0489
cartilage morphogenesis (GO:0060536)	12	1	0.05	+	21.55	0.0489
vasculogenesis (GO:0001570)	90	2	0.35	+	5.75	0.0491
regulation of plasma membrane bounded cell projection assembly (GO:0120032)	210	3	0.81	+	3.69	0.0492
cellular response to stress (GO:0033554)	1534	11	5.93	+	1.85	0.05

## Sheet: Supplementary File 3e
GO biological process complete	Mus musculus - REFLIST (21983)	Client Text Box Input (89)	Client Text Box Input (expected)	Client Text Box Input (over/under)	Client Text Box Input (fold Enrichment)	Client Text Box Input (raw P-value)
lipid metabolic process (GO:0006629)	1243	25	5.03	+	4.97	1.83e-11
primary metabolic process (GO:0044238)	6912	59	27.98	+	2.11	1.93e-11
organic substance metabolic process (GO:0071704)	7637	62	30.92	+	2.01	2.85e-11
metabolic process (GO:0008152)	8051	63	32.6	+	1.93	1.15e-10
cellular lipid metabolic process (GO:0044255)	927	21	3.75	+	5.6	1.28e-10
glycerolipid metabolic process (GO:0046486)	341	12	1.38	+	8.69	1.83e-08
acylglycerol metabolic process (GO:0006639)	109	8	0.44	+	18.13	2.42e-08
neutral lipid metabolic process (GO:0006638)	111	8	0.45	+	17.8	2.76e-08
triglyceride metabolic process (GO:0006641)	73	7	0.3	+	23.68	3.41e-08
regulation of lipid metabolic process (GO:0019216)	373	12	1.51	+	7.95	4.74e-08
fatty acid metabolic process (GO:0006631)	374	12	1.51	+	7.93	4.88e-08
small molecule metabolic process (GO:0044281)	1581	23	6.4	+	3.59	6.07e-08
positive regulation of biological process (GO:0048518)	6391	50	25.87	+	1.93	1.18e-07
cellular process (GO:0009987)	15465	83	62.61	+	1.33	1.49e-07
cellular metabolic process (GO:0044237)	6463	50	26.17	+	1.91	2.46e-07
lipid catabolic process (GO:0016042)	289	10	1.17	+	8.55	3.54e-07
phosphate-containing compound metabolic process (GO:0006796)	1747	23	7.07	+	3.25	3.57e-07
regulation of lipid biosynthetic process (GO:0046890)	222	9	0.9	+	10.01	3.96e-07
phosphorus metabolic process (GO:0006793)	1769	23	7.16	+	3.21	4.44e-07
response to hormone (GO:0009725)	657	14	2.66	+	5.26	4.68e-07
monocarboxylic acid metabolic process (GO:0032787)	565	13	2.29	+	5.68	5.42e-07
positive regulation of cellular process (GO:0048522)	5901	46	23.89	+	1.93	8.44e-07
positive regulation of metabolic process (GO:0009893)	3808	35	15.42	+	2.27	8.68e-07
maintenance of location (GO:0051235)	183	8	0.74	+	10.8	1.05e-06
carboxylic acid metabolic process (GO:0019752)	817	15	3.31	+	4.53	1.1e-06
regulation of lipid localization (GO:1905952)	191	8	0.77	+	10.35	1.43e-06
oxoacid metabolic process (GO:0043436)	837	15	3.39	+	4.43	1.48e-06
organic acid metabolic process (GO:0006082)	844	15	3.42	+	4.39	1.64e-06
organonitrogen compound metabolic process (GO:1901564)	4669	39	18.9	+	2.06	1.74e-06
cellular lipid catabolic process (GO:0044242)	197	8	0.8	+	10.03	1.79e-06
regulation of metabolic process (GO:0019222)	6551	48	26.52	+	1.81	2.25e-06
positive regulation of cellular metabolic process (GO:0031325)	3427	32	13.87	+	2.31	2.51e-06
regulation of triglyceride metabolic process (GO:0090207)	52	5	0.21	+	23.75	3.38e-06
lipid storage (GO:0019915)	52	5	0.21	+	23.75	3.38e-06
regulation of primary metabolic process (GO:0080090)	5594	43	22.65	+	1.9	3.93e-06
positive regulation of lipid metabolic process (GO:0045834)	164	7	0.66	+	10.54	5.98e-06
regulation of cellular metabolic process (GO:0031323)	5927	44	24	+	1.83	6.69e-06
biosynthetic process (GO:0009058)	4090	35	16.56	+	2.11	6.7e-06
positive regulation of lipid biosynthetic process (GO:0046889)	115	6	0.47	+	12.89	9.61e-06
lipid homeostasis (GO:0055088)	183	7	0.74	+	9.45	1.19e-05
lipid biosynthetic process (GO:0008610)	537	11	2.17	+	5.06	1.27e-05
glycerolipid biosynthetic process (GO:0045017)	188	7	0.76	+	9.2	1.41e-05
organophosphate metabolic process (GO:0019637)	887	14	3.59	+	3.9	1.43e-05
nitrogen compound metabolic process (GO:0006807)	6351	45	25.71	+	1.75	1.85e-05
lipid localization (GO:0010876)	382	9	1.55	+	5.82	2.86e-05
organic substance biosynthetic process (GO:1901576)	4034	33	16.33	+	2.02	2.87e-05
organophosphate biosynthetic process (GO:0090407)	484	10	1.96	+	5.1	3.01e-05
positive regulation of developmental process (GO:0051094)	1515	18	6.13	+	2.93	3.39e-05
organic acid catabolic process (GO:0016054)	217	7	0.88	+	7.97	3.43e-05
carboxylic acid catabolic process (GO:0046395)	217	7	0.88	+	7.97	3.43e-05
fatty acid catabolic process (GO:0009062)	87	5	0.35	+	14.2	3.55e-05
regulation of protein metabolic process (GO:0051246)	2326	23	9.42	+	2.44	4.12e-05
regulation of cold-induced thermogenesis (GO:0120161)	151	6	0.61	+	9.81	4.2e-05
energy homeostasis (GO:0097009)	91	5	0.37	+	13.57	4.36e-05
regulation of developmental process (GO:0050793)	2646	25	10.71	+	2.33	4.69e-05
response to endogenous stimulus (GO:0009719)	1278	16	5.17	+	3.09	5.4e-05
triglyceride catabolic process (GO:0019433)	16	3	0.06	+	46.31	5.86e-05
positive regulation of multicellular organismal process (GO:0051240)	1890	20	7.65	+	2.61	5.87e-05
small molecule catabolic process (GO:0044282)	325	8	1.32	+	6.08	6.03e-05
response to peptide hormone (GO:0043434)	326	8	1.32	+	6.06	6.16e-05
positive regulation of cold-induced thermogenesis (GO:0120162)	101	5	0.41	+	12.23	7e-05
regulation of multicellular organismal process (GO:0051239)	3270	28	13.24	+	2.11	7.23e-05
response to oxygen-containing compound (GO:1901700)	1469	17	5.95	+	2.86	8.03e-05
phospholipid metabolic process (GO:0006644)	340	8	1.38	+	5.81	8.2e-05
glycerolipid catabolic process (GO:0046503)	53	4	0.21	+	18.64	8.29e-05
regulation of cell population proliferation (GO:0042127)	1786	19	7.23	+	2.63	8.72e-05
regulation of fatty acid metabolic process (GO:0019217)	108	5	0.44	+	11.44	9.48e-05
regulation of protein modification process (GO:0031399)	1347	16	5.45	+	2.93	9.97e-05
aldehyde biosynthetic process (GO:0046184)	20	3	0.08	+	37.05	0.000106
glycerophospholipid metabolic process (GO:0006650)	261	7	1.06	+	6.62	0.000106
monocarboxylic acid catabolic process (GO:0072329)	116	5	0.47	+	10.65	0.000131
positive regulation of nitrogen compound metabolic process (GO:0051173)	2999	26	12.14	+	2.14	0.000134
homeostatic process (GO:0042592)	1534	17	6.21	+	2.74	0.000135
negative regulation of lipid localization (GO:1905953)	61	4	0.25	+	16.2	0.000139
response to organic substance (GO:0010033)	2499	23	10.12	+	2.27	0.000143
regulation of cell differentiation (GO:0045595)	1700	18	6.88	+	2.62	0.000147
regulation of molecular function (GO:0065009)	2286	22	9.26	+	2.38	0.000147
regulation of catabolic process (GO:0009894)	982	13	3.98	+	3.27	0.000172
triglyceride biosynthetic process (GO:0019432)	24	3	0.1	+	30.88	0.000173
regulation of small molecule metabolic process (GO:0062012)	384	8	1.55	+	5.15	0.000186
phosphatidic acid metabolic process (GO:0046473)	25	3	0.1	+	29.64	0.000193
positive regulation of cell differentiation (GO:0045597)	996	13	4.03	+	3.22	0.000197
phospholipid biosynthetic process (GO:0008654)	203	6	0.82	+	7.3	0.000203
positive regulation of macromolecule metabolic process (GO:0010604)	3461	28	14.01	+	2	0.000205
regulation of membrane protein ectodomain proteolysis (GO:0051043)	26	3	0.11	+	28.5	0.000215
regulation of triglyceride biosynthetic process (GO:0010866)	26	3	0.11	+	28.5	0.000215
response to peptide (GO:1901652)	394	8	1.6	+	5.02	0.00022
regulation of phosphate metabolic process (GO:0019220)	1296	15	5.25	+	2.86	0.000224
regulation of phosphorus metabolic process (GO:0051174)	1297	15	5.25	+	2.86	0.000226
regulation of high-density lipoprotein particle clearance (GO:0010982)	4	2	0.02	+	> 100	0.000239
maintenance of protein location in cell (GO:0032507)	71	4	0.29	+	13.92	0.000241
positive regulation of biosynthetic process (GO:0009891)	2707	24	10.96	+	2.19	0.000254
regulation of cellular catabolic process (GO:0031329)	634	10	2.57	+	3.9	0.000267
regulation of localization (GO:0032879)	2251	21	9.11	+	2.3	0.000281
acylglycerol catabolic process (GO:0046464)	29	3	0.12	+	25.55	0.000289
neutral lipid catabolic process (GO:0046461)	29	3	0.12	+	25.55	0.000289
regulation of protein phosphorylation (GO:0001932)	1038	13	4.2	+	3.09	0.000293
negative regulation of biological process (GO:0048519)	5522	38	22.36	+	1.7	0.000322
regulation of peptidase activity (GO:0052547)	429	8	1.74	+	4.61	0.000386
cellular catabolic process (GO:0044248)	1069	13	4.33	+	3	0.000387
cellular biosynthetic process (GO:0044249)	3923	30	15.88	+	1.89	0.00041
triglyceride mobilization (GO:0006642)	6	2	0.02	+	82.33	0.000443
regulation of endopeptidase activity (GO:0052548)	332	7	1.34	+	5.21	0.000444
positive regulation of cellular biosynthetic process (GO:0031328)	2679	23	10.85	+	2.12	0.000461
regulation of nitrogen compound metabolic process (GO:0051171)	5404	37	21.88	+	1.69	0.000471
regulation of macromolecule metabolic process (GO:0060255)	6031	40	24.42	+	1.64	0.000476
response to ketone (GO:1901654)	155	5	0.63	+	7.97	0.000478
negative regulation of lipid transport (GO:0032369)	35	3	0.14	+	21.17	0.000483
response to activity (GO:0014823)	35	3	0.14	+	21.17	0.000483
positive regulation of phosphorus metabolic process (GO:0010562)	821	11	3.32	+	3.31	0.000512
positive regulation of phosphate metabolic process (GO:0045937)	821	11	3.32	+	3.31	0.000512
regulation of lipid transport (GO:0032368)	158	5	0.64	+	7.82	0.00052
negative regulation of cellular process (GO:0048523)	5040	35	20.4	+	1.72	0.000557
negative regulation of smooth muscle cell migration (GO:0014912)	37	3	0.15	+	20.03	0.000562
negative regulation of membrane protein ectodomain proteolysis (GO:0051045)	7	2	0.03	+	70.57	0.000568
negative regulation of catabolic process (GO:0009895)	347	7	1.4	+	4.98	0.000575
phosphorylation (GO:0016310)	833	11	3.37	+	3.26	0.000577
regulation of cellular process (GO:0050794)	11558	63	46.79	+	1.35	0.000598
regulation of phosphorylation (GO:0042325)	1123	13	4.55	+	2.86	0.000612
acylglycerol biosynthetic process (GO:0046463)	39	3	0.16	+	19	0.000649
neutral lipid biosynthetic process (GO:0046460)	39	3	0.16	+	19	0.000649
developmental process (GO:0032502)	5880	39	23.81	+	1.64	0.00067
regulation of catalytic activity (GO:0050790)	1599	16	6.47	+	2.47	0.000672
negative regulation of oxidative phosphorylation (GO:0090324)	8	2	0.03	+	61.75	0.000708
negative regulation of cellular metabolic process (GO:0031324)	2587	22	10.47	+	2.1	0.00072
regulation of cellular ketone metabolic process (GO:0010565)	171	5	0.69	+	7.22	0.000736
maintenance of protein location (GO:0045185)	97	4	0.39	+	10.19	0.000749
cholesterol homeostasis (GO:0042632)	100	4	0.4	+	9.88	0.000835
negative regulation of hormone secretion (GO:0046888)	100	4	0.4	+	9.88	0.000835
regulation of biological process (GO:0050789)	12183	65	49.32	+	1.32	0.000835
negative regulation of metabolic process (GO:0009892)	2967	24	12.01	+	2	0.000848
sterol homeostasis (GO:0055092)	101	4	0.41	+	9.78	0.000866
response to dietary excess (GO:0002021)	45	3	0.18	+	16.47	0.000961
negative regulation of transport (GO:0051051)	495	8	2	+	3.99	0.000967
regulation of hormone levels (GO:0010817)	620	9	2.51	+	3.59	0.00098
negative regulation of cellular response to growth factor stimulus (GO:0090288)	106	4	0.43	+	9.32	0.00103
regulation of smooth muscle cell migration (GO:0014910)	106	4	0.43	+	9.32	0.00103
negative regulation of cellular respiration (GO:1901856)	10	2	0.04	+	49.4	0.00103
translation at presynapse (GO:0140236)	47	3	0.19	+	15.77	0.00108
maintenance of location in cell (GO:0051651)	108	4	0.44	+	9.15	0.0011
translation at postsynapse (GO:0140242)	48	3	0.19	+	15.44	0.00115
translation at synapse (GO:0140241)	48	3	0.19	+	15.44	0.00115
biological regulation (GO:0065007)	12576	66	50.91	+	1.3	0.00118
positive regulation of cell population proliferation (GO:0008284)	1058	12	4.28	+	2.8	0.0012
positive regulation of fatty acid metabolic process (GO:0045923)	49	3	0.2	+	15.12	0.00121
complement activation, alternative pathway (GO:0006957)	11	2	0.04	+	44.91	0.00122
response to glucose (GO:0009749)	113	4	0.46	+	8.74	0.00129
protein metabolic process (GO:0019538)	3613	27	14.63	+	1.85	0.00134
regulation of fatty acid biosynthetic process (GO:0042304)	51	3	0.21	+	14.53	0.00135
regulation of cellular biosynthetic process (GO:0031326)	5021	34	20.33	+	1.67	0.00136
response to hexose (GO:0009746)	115	4	0.47	+	8.59	0.00138
glyceraldehyde-3-phosphate biosynthetic process (GO:0046166)	12	2	0.05	+	41.17	0.00142
response to monosaccharide (GO:0034284)	116	4	0.47	+	8.52	0.00142
regulation of biosynthetic process (GO:0009889)	5065	34	20.51	+	1.66	0.00144
cytoplasmic translation (GO:0002181)	117	4	0.47	+	8.44	0.00147
regulation of transport (GO:0051049)	1846	17	7.47	+	2.27	0.00151
phosphatidylcholine metabolic process (GO:0046470)	54	3	0.22	+	13.72	0.00158
Peyer's patch development (GO:0048541)	13	2	0.05	+	38	0.00163
mucosa-associated lymphoid tissue development (GO:0048537)	13	2	0.05	+	38	0.00163
catabolic process (GO:0009056)	1882	17	7.62	+	2.23	0.00171
macromolecule localization (GO:0033036)	2408	20	9.75	+	2.05	0.00175
negative regulation of protein metabolic process (GO:0051248)	958	11	3.88	+	2.84	0.00176
response to nitrogen compound (GO:1901698)	960	11	3.89	+	2.83	0.00179
organic substance catabolic process (GO:1901575)	1590	15	6.44	+	2.33	0.00181
positive regulation of protein phosphorylation (GO:0001934)	679	9	2.75	+	3.27	0.00182
protein phosphorylation (GO:0006468)	679	9	2.75	+	3.27	0.00182
negative regulation of cellular catabolic process (GO:0031330)	211	5	0.85	+	5.85	0.00183
positive regulation of hormone biosynthetic process (GO:0046886)	14	2	0.06	+	35.29	0.00186
plasma membrane tubulation (GO:0097320)	14	2	0.06	+	35.29	0.00186
response to chemical (GO:0042221)	3896	28	15.77	+	1.78	0.0019
positive regulation of lipid localization (GO:1905954)	126	4	0.51	+	7.84	0.00191
negative regulation of BMP signaling pathway (GO:0030514)	58	3	0.23	+	12.78	0.00193
regulation of lipid storage (GO:0010883)	58	3	0.23	+	12.78	0.00193
positive regulation of molecular function (GO:0044093)	1287	13	5.21	+	2.49	0.00208
negative regulation of triglyceride metabolic process (GO:0090209)	15	2	0.06	+	32.93	0.0021
protein homotrimerization (GO:0070207)	15	2	0.06	+	32.93	0.0021
regulation of triglyceride catabolic process (GO:0010896)	15	2	0.06	+	32.93	0.0021
regulation of sequestering of triglyceride (GO:0010889)	15	2	0.06	+	32.93	0.0021
high-density lipoprotein particle remodeling (GO:0034375)	15	2	0.06	+	32.93	0.0021
response to carbohydrate (GO:0009743)	131	4	0.53	+	7.54	0.00219
cellular response to transforming growth factor beta stimulus (GO:0071560)	132	4	0.53	+	7.48	0.00225
protein localization to plasma membrane (GO:0072659)	224	5	0.91	+	5.51	0.00236
dicarboxylic acid catabolic process (GO:0043649)	16	2	0.06	+	30.88	0.00236
regulation of cellular respiration (GO:0043457)	63	3	0.26	+	11.76	0.00241
negative regulation of protein modification process (GO:0031400)	448	7	1.81	+	3.86	0.00243
cellular response to glucose stimulus (GO:0071333)	64	3	0.26	+	11.58	0.00252
response to transforming growth factor beta (GO:0071559)	138	4	0.56	+	7.16	0.00263
NADPH regeneration (GO:0006740)	17	2	0.07	+	29.06	0.00263
cellular response to cold (GO:0070417)	17	2	0.07	+	29.06	0.00263
cellular response to hexose stimulus (GO:0071331)	66	3	0.27	+	11.23	0.00274
positive regulation of protein metabolic process (GO:0051247)	1333	13	5.4	+	2.41	0.00282
positive regulation of protein modification process (GO:0031401)	869	10	3.52	+	2.84	0.00282
lipid transport (GO:0006869)	342	6	1.38	+	4.33	0.00285
cellular response to monosaccharide stimulus (GO:0071326)	67	3	0.27	+	11.06	0.00285
positive regulation of phosphorylation (GO:0042327)	728	9	2.95	+	3.05	0.00289
protein trimerization (GO:0070206)	18	2	0.07	+	27.44	0.00291
regulation of MAPK cascade (GO:0043408)	730	9	2.96	+	3.05	0.00294
regulation of proteolysis (GO:0030162)	734	9	2.97	+	3.03	0.00305
adenylate cyclase-activating G protein-coupled receptor signaling pathway (GO:0007189)	145	4	0.59	+	6.81	0.00312
negative regulation of nitric oxide biosynthetic process (GO:0045019)	19	2	0.08	+	26	0.00321
negative regulation of nitric oxide metabolic process (GO:1904406)	19	2	0.08	+	26	0.00321
glyceraldehyde-3-phosphate metabolic process (GO:0019682)	19	2	0.08	+	26	0.00321
negative regulation of endocytosis (GO:0045806)	70	3	0.28	+	10.59	0.00322
generation of precursor metabolites and energy (GO:0006091)	352	6	1.43	+	4.21	0.00328
regulation of hydrolase activity (GO:0051336)	889	10	3.6	+	2.78	0.00332
negative regulation of macromolecule metabolic process (GO:0010605)	2733	21	11.06	+	1.9	0.00333
regulation of cholesterol transport (GO:0032374)	71	3	0.29	+	10.44	0.00334
regulation of sterol transport (GO:0032371)	71	3	0.29	+	10.44	0.00334
regulation of lipid catabolic process (GO:0050994)	71	3	0.29	+	10.44	0.00334
regulation of peptidyl-serine phosphorylation (GO:0033135)	148	4	0.6	+	6.68	0.00335
plasma membrane organization (GO:0007009)	149	4	0.6	+	6.63	0.00343
glycerol ether metabolic process (GO:0006662)	20	2	0.08	+	24.7	0.00352
phosphatidic acid biosynthetic process (GO:0006654)	20	2	0.08	+	24.7	0.00352
ether lipid metabolic process (GO:0046485)	20	2	0.08	+	24.7	0.00352
regulation of oxidoreductase activity (GO:0051341)	73	3	0.3	+	10.15	0.0036
cellular aldehyde metabolic process (GO:0006081)	74	3	0.3	+	10.01	0.00374
negative regulation of smooth muscle cell proliferation (GO:0048662)	74	3	0.3	+	10.01	0.00374
cellular response to carbohydrate stimulus (GO:0071322)	75	3	0.3	+	9.88	0.00388
glycerophospholipid biosynthetic process (GO:0046474)	155	4	0.63	+	6.37	0.00394
regulation of vascular associated smooth muscle cell proliferation (GO:1904705)	77	3	0.31	+	9.62	0.00416
negative regulation of oxidoreductase activity (GO:0051354)	22	2	0.09	+	22.45	0.00419
regulation of lipoprotein particle clearance (GO:0010984)	22	2	0.09	+	22.45	0.00419
cellular response to organic substance (GO:0071310)	1705	15	6.9	+	2.17	0.00423
positive regulation of macromolecule biosynthetic process (GO:0010557)	2579	20	10.44	+	1.92	0.00428
fatty acid oxidation (GO:0019395)	78	3	0.32	+	9.5	0.00431
endocytosis (GO:0006897)	498	7	2.02	+	3.47	0.00432
cholesterol transport (GO:0030301)	79	3	0.32	+	9.38	0.00446
chemical homeostasis (GO:0048878)	935	10	3.79	+	2.64	0.00471
negative regulation of protein ubiquitination (GO:0031397)	81	3	0.33	+	9.15	0.00477
regulation of ATP metabolic process (GO:1903578)	81	3	0.33	+	9.15	0.00477
ether metabolic process (GO:0018904)	24	2	0.1	+	20.58	0.00491
sterol transport (GO:0015918)	82	3	0.33	+	9.04	0.00493
regulation of G1/S transition of mitotic cell cycle (GO:2000045)	166	4	0.67	+	5.95	0.00499
negative regulation of nitrogen compound metabolic process (GO:0051172)	2288	18	9.26	+	1.94	0.00506
positive regulation of hormone metabolic process (GO:0032352)	25	2	0.1	+	19.76	0.00529
positive regulation of lipid storage (GO:0010884)	25	2	0.1	+	19.76	0.00529
plasma lipoprotein particle remodeling (GO:0034369)	25	2	0.1	+	19.76	0.00529
protein-lipid complex remodeling (GO:0034368)	25	2	0.1	+	19.76	0.00529
lipid modification (GO:0030258)	169	4	0.68	+	5.85	0.00531
regulation of signaling (GO:0023051)	3542	25	14.34	+	1.74	0.00544
regulation of cell communication (GO:0010646)	3543	25	14.34	+	1.74	0.00544
lipid oxidation (GO:0034440)	86	3	0.35	+	8.62	0.00561
retina development in camera-type eye (GO:0060041)	172	4	0.7	+	5.74	0.00564
nitric oxide metabolic process (GO:0046209)	26	2	0.11	+	19	0.00568
extracellular matrix organization (GO:0030198)	278	5	1.13	+	4.44	0.00578
external encapsulating structure organization (GO:0045229)	279	5	1.13	+	4.43	0.00587
negative regulation of transcription by RNA polymerase II (GO:0000122)	966	10	3.91	+	2.56	0.00589
extracellular structure organization (GO:0043062)	280	5	1.13	+	4.41	0.00595
positive regulation of MAPK cascade (GO:0043410)	530	7	2.15	+	3.26	0.00601
regulation of multicellular organismal development (GO:2000026)	1592	14	6.45	+	2.17	0.00604
positive regulation of fatty acid biosynthetic process (GO:0045723)	27	2	0.11	+	18.3	0.00608
regulation of oxidative phosphorylation (GO:0002082)	27	2	0.11	+	18.3	0.00608
negative regulation of ATP metabolic process (GO:1903579)	27	2	0.11	+	18.3	0.00608
intracellular glucose homeostasis (GO:0001678)	89	3	0.36	+	8.33	0.00615
regulation of transcription by RNA polymerase II (GO:0006357)	2470	19	10	+	1.9	0.00616
protein localization to cell periphery (GO:1990778)	283	5	1.15	+	4.36	0.00622
reactive nitrogen species metabolic process (GO:2001057)	28	2	0.11	+	17.64	0.0065
positive regulation of triglyceride metabolic process (GO:0090208)	28	2	0.11	+	17.64	0.0065
regulation of programmed necrotic cell death (GO:0062098)	28	2	0.11	+	17.64	0.0065
protein-containing complex remodeling (GO:0034367)	28	2	0.11	+	17.64	0.0065
dicarboxylic acid metabolic process (GO:0043648)	91	3	0.37	+	8.14	0.00652
response to organonitrogen compound (GO:0010243)	829	9	3.36	+	2.68	0.00664
negative regulation of protein modification by small protein conjugation or removal (GO:1903321)	92	3	0.37	+	8.05	0.00671
cellular homeostasis (GO:0019725)	684	8	2.77	+	2.89	0.00681
response to dexamethasone (GO:0071548)	29	2	0.12	+	17.03	0.00693
negative regulation of peptidyl-serine phosphorylation (GO:0033137)	29	2	0.12	+	17.03	0.00693
negative regulation of phosphorus metabolic process (GO:0010563)	413	6	1.67	+	3.59	0.00699
negative regulation of phosphate metabolic process (GO:0045936)	413	6	1.67	+	3.59	0.00699
cell differentiation (GO:0030154)	3847	26	15.57	+	1.67	0.00725
cellular developmental process (GO:0048869)	3848	26	15.58	+	1.67	0.00726
positive regulation of small molecule metabolic process (GO:0062013)	186	4	0.75	+	5.31	0.00736
negative regulation of purine nucleotide metabolic process (GO:1900543)	30	2	0.12	+	16.47	0.00737
regulation of hormone biosynthetic process (GO:0046885)	30	2	0.12	+	16.47	0.00737
positive regulation of steroid biosynthetic process (GO:0010893)	30	2	0.12	+	16.47	0.00737
negative regulation of secretion by cell (GO:1903531)	187	4	0.76	+	5.28	0.00749
negative regulation of post-translational protein modification (GO:1901874)	96	3	0.39	+	7.72	0.00752
regulation of steroid biosynthetic process (GO:0050810)	96	3	0.39	+	7.72	0.00752
response to steroid hormone (GO:0048545)	188	4	0.76	+	5.26	0.00763
positive regulation of cell development (GO:0010720)	556	7	2.25	+	3.11	0.0077
negative regulation of nucleotide metabolic process (GO:0045980)	31	2	0.13	+	15.94	0.00783
diacylglycerol metabolic process (GO:0046339)	31	2	0.13	+	15.94	0.00783
protein polymerization (GO:0051258)	98	3	0.4	+	7.56	0.00795
acetaldehyde biosynthetic process (GO:0046186)	1	1	0	+	> 100	0.00805
negative regulation of testosterone secretion (GO:2000844)	1	1	0	+	> 100	0.00805
rhombomere 6 development (GO:0021572)	1	1	0	+	> 100	0.00805
thyroid-stimulating hormone signaling pathway (GO:0038194)	1	1	0	+	> 100	0.00805
glutamate catabolic process via 2-oxoglutarate (GO:0006539)	1	1	0	+	> 100	0.00805
cellular organofluorine metabolic process (GO:0090346)	1	1	0	+	> 100	0.00805
cellular organohalogen metabolic process (GO:0090345)	1	1	0	+	> 100	0.00805
positive regulation of progesterone biosynthetic process (GO:2000184)	1	1	0	+	> 100	0.00805
nitrate catabolic process (GO:0043602)	1	1	0	+	> 100	0.00805
brown fat cell proliferation (GO:0070342)	1	1	0	+	> 100	0.00805
cellular response to thyrotropin-releasing hormone (GO:1905229)	1	1	0	+	> 100	0.00805
response to thyrotropin-releasing hormone (GO:1905225)	1	1	0	+	> 100	0.00805
negative regulation of peptidyl-tyrosine autophosphorylation (GO:1900085)	1	1	0	+	> 100	0.00805
negative regulation of high-density lipoprotein particle clearance (GO:0010987)	1	1	0	+	> 100	0.00805
regulation of plasma membrane raft polarization (GO:1903906)	1	1	0	+	> 100	0.00805
negative regulation of inward rectifier potassium channel activity (GO:1903609)	1	1	0	+	> 100	0.00805
nitric oxide catabolic process (GO:0046210)	1	1	0	+	> 100	0.00805
regulation of smooth muscle cell proliferation (GO:0048660)	192	4	0.78	+	5.15	0.00819
regulation of cell cycle G1/S phase transition (GO:1902806)	192	4	0.78	+	5.15	0.00819
cellular response to hormone stimulus (GO:0032870)	428	6	1.73	+	3.46	0.00824
cholesterol efflux (GO:0033344)	32	2	0.13	+	15.44	0.00829
negative regulation of lipid catabolic process (GO:0050995)	32	2	0.13	+	15.44	0.00829
regulation of purine nucleotide metabolic process (GO:1900542)	100	3	0.4	+	7.41	0.00838
regionalization (GO:0003002)	430	6	1.74	+	3.45	0.00841
system development (GO:0048731)	3519	24	14.25	+	1.68	0.00849
negative regulation of signaling (GO:0023057)	1477	13	5.98	+	2.17	0.00858
regulation of nucleotide metabolic process (GO:0006140)	101	3	0.41	+	7.34	0.00861
negative regulation of cell communication (GO:0010648)	1480	13	5.99	+	2.17	0.00866
vascular associated smooth muscle cell differentiation (GO:0035886)	33	2	0.13	+	14.97	0.00877
negative regulation of nucleobase-containing compound metabolic process (GO:0045934)	1485	13	6.01	+	2.16	0.0088
intracellular chemical homeostasis (GO:0055082)	575	7	2.33	+	3.01	0.00916
cellular response to oxygen-containing compound (GO:1901701)	1036	10	4.19	+	2.38	0.00938
response to lipid (GO:0033993)	725	8	2.94	+	2.73	0.00948
regulation of BMP signaling pathway (GO:0030510)	105	3	0.43	+	7.06	0.00954
negative regulation of cell migration (GO:0030336)	315	5	1.28	+	3.92	0.00957
purine nucleotide metabolic process (GO:0006163)	446	6	1.81	+	3.32	0.00994
cellular component disassembly (GO:0022411)	319	5	1.29	+	3.87	0.0101
regulation of monooxygenase activity (GO:0032768)	36	2	0.15	+	13.72	0.0103
cellular response to mechanical stimulus (GO:0071260)	36	2	0.15	+	13.72	0.0103
lipid droplet organization (GO:0034389)	36	2	0.15	+	13.72	0.0103
negative regulation of protein phosphorylation (GO:0001933)	321	5	1.3	+	3.85	0.0103
negative regulation of catalytic activity (GO:0043086)	589	7	2.38	+	2.94	0.0103
cellular component organization or biogenesis (GO:0071840)	5691	34	23.04	+	1.48	0.0107
demethylation (GO:0070988)	37	2	0.15	+	13.35	0.0108
triglyceride homeostasis (GO:0070328)	37	2	0.15	+	13.35	0.0108
regulation of aerobic respiration (GO:1903715)	37	2	0.15	+	13.35	0.0108
protein-containing complex organization (GO:0043933)	1850	15	7.49	+	2	0.0109
regulation of nucleobase-containing compound metabolic process (GO:0019219)	3806	25	15.41	+	1.62	0.011
nervous system development (GO:0007399)	2096	16	8.49	+	1.89	0.0112
negative regulation of secretion (GO:0051048)	211	4	0.85	+	4.68	0.0112
negative regulation of cell motility (GO:2000146)	328	5	1.33	+	3.77	0.0112
acylglycerol homeostasis (GO:0055090)	38	2	0.15	+	13	0.0114
plasma lipoprotein particle organization (GO:0071827)	39	2	0.16	+	12.67	0.0119
negative regulation of corticosterone secretion (GO:2000853)	2	1	0.01	+	> 100	0.012
positive regulation of cell adhesion molecule production (GO:0060355)	2	1	0.01	+	> 100	0.012
abducens nerve formation (GO:0021599)	2	1	0.01	+	> 100	0.012
abducens nerve morphogenesis (GO:0021598)	2	1	0.01	+	> 100	0.012
abducens nerve development (GO:0021560)	2	1	0.01	+	> 100	0.012
positive regulation of activation of membrane attack complex (GO:0001970)	2	1	0.01	+	> 100	0.012
viral protein processing (GO:0019082)	2	1	0.01	+	> 100	0.012
negative regulation of primary amine oxidase activity (GO:1902283)	2	1	0.01	+	> 100	0.012
positive regulation of peptidyl-cysteine S-nitrosylation (GO:2000170)	2	1	0.01	+	> 100	0.012
acetaldehyde metabolic process (GO:0006117)	2	1	0.01	+	> 100	0.012
negative regulation of chorionic trophoblast cell proliferation (GO:1901383)	2	1	0.01	+	> 100	0.012
cellular detoxification of hydrogen peroxide (GO:0061692)	2	1	0.01	+	> 100	0.012
positive regulation of protein processing in phagocytic vesicle (GO:1903923)	2	1	0.01	+	> 100	0.012
regulation of protein processing in phagocytic vesicle (GO:1903921)	2	1	0.01	+	> 100	0.012
establishment of glial blood-brain barrier (GO:0060857)	2	1	0.01	+	> 100	0.012
complement-dependent cytotoxicity (GO:0097278)	2	1	0.01	+	> 100	0.012
negative regulation of cholesterol import (GO:0060621)	2	1	0.01	+	> 100	0.012
glycerol biosynthetic process from pyruvate (GO:0046327)	2	1	0.01	+	> 100	0.012
propionate catabolic process (GO:0019543)	2	1	0.01	+	> 100	0.012
positive regulation of cellular catabolic process (GO:0031331)	334	5	1.35	+	3.7	0.0121
regulation of vesicle-mediated transport (GO:0060627)	609	7	2.47	+	2.84	0.0122
regulation of hormone secretion (GO:0046883)	336	5	1.36	+	3.68	0.0123
positive regulation of peptidyl-serine phosphorylation (GO:0033138)	116	3	0.47	+	6.39	0.0124
positive regulation of steroid metabolic process (GO:0045940)	40	2	0.16	+	12.35	0.0125
regulation of endocytosis (GO:0030100)	337	5	1.36	+	3.66	0.0125
cellular response to peptide hormone stimulus (GO:0071375)	219	4	0.89	+	4.51	0.0127
negative regulation of cell population proliferation (GO:0008285)	765	8	3.1	+	2.58	0.0128
regulation of DNA binding (GO:0051101)	118	3	0.48	+	6.28	0.013
positive regulation of cysteine-type endopeptidase activity involved in apoptotic process (GO:0043280)	118	3	0.48	+	6.28	0.013
pattern specification process (GO:0007389)	474	6	1.92	+	3.13	0.0131
negative regulation of small molecule metabolic process (GO:0062014)	119	3	0.48	+	6.23	0.0133
cellular component organization (GO:0016043)	5478	33	22.18	+	1.49	0.0134
negative regulation of phosphorylation (GO:0042326)	344	5	1.39	+	3.59	0.0135
NADP metabolic process (GO:0006739)	42	2	0.17	+	11.76	0.0136
purine-containing compound metabolic process (GO:0072521)	479	6	1.94	+	3.09	0.0137
positive regulation of DNA-templated transcription (GO:0045893)	1609	13	6.51	+	2	0.0141
adenylate cyclase-modulating G protein-coupled receptor signaling pathway (GO:0007188)	226	4	0.91	+	4.37	0.0141
protein-lipid complex organization (GO:0071825)	43	2	0.17	+	11.49	0.0142
positive regulation of ATP metabolic process (GO:1903580)	43	2	0.17	+	11.49	0.0142
regulation of macromolecule biosynthetic process (GO:0010556)	4863	30	19.69	+	1.52	0.0143
regulation of steroid metabolic process (GO:0019218)	123	3	0.5	+	6.02	0.0144
positive regulation of proteolysis (GO:0045862)	352	5	1.43	+	3.51	0.0148
positive regulation of vascular associated smooth muscle cell proliferation (GO:1904707)	44	2	0.18	+	11.23	0.0148
maintenance of protein localization in organelle (GO:0072595)	44	2	0.18	+	11.23	0.0148
amide metabolic process (GO:0043603)	788	8	3.19	+	2.51	0.015
positive regulation of nucleobase-containing compound metabolic process (GO:0045935)	1973	15	7.99	+	1.88	0.0151
hematopoietic or lymphoid organ development (GO:0048534)	125	3	0.51	+	5.93	0.0151
sensory organ development (GO:0007423)	636	7	2.57	+	2.72	0.0152
response to cold (GO:0009409)	45	2	0.18	+	10.98	0.0155
multicellular organism development (GO:0007275)	4310	27	17.45	+	1.55	0.0155
embryonic morphogenesis (GO:0048598)	640	7	2.59	+	2.7	0.0157
protein localization (GO:0008104)	1986	15	8.04	+	1.87	0.0157
regulation of neuron differentiation (GO:0045664)	234	4	0.95	+	4.22	0.0158
camera-type eye development (GO:0043010)	358	5	1.45	+	3.45	0.0158
macromolecule metabolic process (GO:0043170)	5835	34	23.62	+	1.44	0.016
positive regulation of metanephric glomerulus development (GO:0072300)	3	1	0.01	+	82.33	0.016
regulation of metanephric glomerulus development (GO:0072298)	3	1	0.01	+	82.33	0.016
positive regulation of metanephros development (GO:0072216)	3	1	0.01	+	82.33	0.016
negative regulation of ferroptosis (GO:0110076)	3	1	0.01	+	82.33	0.016
intracellular nitric oxide homeostasis (GO:0033484)	3	1	0.01	+	82.33	0.016
transforming growth factor beta receptor complex assembly (GO:0007181)	3	1	0.01	+	82.33	0.016
chromatin looping (GO:0140588)	3	1	0.01	+	82.33	0.016
lipid droplet fusion (GO:0160077)	3	1	0.01	+	82.33	0.016
insulin receptor internalization (GO:0038016)	3	1	0.01	+	82.33	0.016
ovarian follicle rupture (GO:0001543)	3	1	0.01	+	82.33	0.016
positive regulation of T-helper 17 cell lineage commitment (GO:2000330)	3	1	0.01	+	82.33	0.016
regulation of progesterone biosynthetic process (GO:2000182)	3	1	0.01	+	82.33	0.016
peptidyl-cysteine methylation (GO:0018125)	3	1	0.01	+	82.33	0.016
calcitonin gene-related peptide receptor signaling pathway (GO:1990408)	3	1	0.01	+	82.33	0.016
maintenance of translational fidelity (GO:1990145)	3	1	0.01	+	82.33	0.016
iron ion import across cell outer membrane (GO:0098706)	3	1	0.01	+	82.33	0.016
positive regulation of podocyte apoptotic process (GO:1904635)	3	1	0.01	+	82.33	0.016
regulation of podocyte apoptotic process (GO:1904633)	3	1	0.01	+	82.33	0.016
10-formyltetrahydrofolate catabolic process (GO:0009258)	3	1	0.01	+	82.33	0.016
cellular response to glycoprotein (GO:1904588)	3	1	0.01	+	82.33	0.016
positive regulation of high-density lipoprotein particle clearance (GO:0010983)	3	1	0.01	+	82.33	0.016
detoxification of hydrogen peroxide (GO:0061691)	3	1	0.01	+	82.33	0.016
brain segmentation (GO:0035284)	3	1	0.01	+	82.33	0.016
vertebrate eye-specific patterning (GO:0150064)	3	1	0.01	+	82.33	0.016
regulation of growth plate cartilage chondrocyte proliferation (GO:0003420)	3	1	0.01	+	82.33	0.016
Peyer's patch morphogenesis (GO:0061146)	3	1	0.01	+	82.33	0.016
cellular macromolecule localization (GO:0070727)	1994	15	8.07	+	1.86	0.0161
positive regulation of cholesterol transport (GO:0032376)	46	2	0.19	+	10.74	0.0161
positive regulation of sterol transport (GO:0032373)	46	2	0.19	+	10.74	0.0161
negative regulation of locomotion (GO:0040013)	360	5	1.46	+	3.43	0.0161
positive regulation of RNA metabolic process (GO:0051254)	1757	14	7.11	+	1.97	0.0162
positive regulation of apoptotic process (GO:0043065)	645	7	2.61	+	2.68	0.0163
nucleotide metabolic process (GO:0009117)	499	6	2.02	+	2.97	0.0164
positive regulation of response to stimulus (GO:0048584)	2371	17	9.6	+	1.77	0.0165
positive regulation of DNA-binding transcription factor activity (GO:0051091)	238	4	0.96	+	4.15	0.0167
regulation of receptor-mediated endocytosis (GO:0048259)	130	3	0.53	+	5.7	0.0167
response to pain (GO:0048265)	47	2	0.19	+	10.51	0.0167
regulation of cell development (GO:0060284)	968	9	3.92	+	2.3	0.0169
negative regulation of cellular biosynthetic process (GO:0031327)	2124	16	8.6	+	1.86	0.0174
positive regulation of DNA binding (GO:0043388)	48	2	0.19	+	10.29	0.0174
execution phase of apoptosis (GO:0097194)	48	2	0.19	+	10.29	0.0174
negative regulation of DNA-templated transcription (GO:0045892)	1244	11	5.04	+	2.18	0.0174
nucleoside phosphate metabolic process (GO:0006753)	506	6	2.05	+	2.93	0.0174
negative regulation of RNA biosynthetic process (GO:1902679)	1253	11	5.07	+	2.17	0.0178
positive regulation of transmembrane transport (GO:0034764)	243	4	0.98	+	4.07	0.0178
negative regulation of biosynthetic process (GO:0009890)	2147	16	8.69	+	1.84	0.018
gluconeogenesis (GO:0006094)	49	2	0.2	+	10.08	0.018
positive regulation of purine nucleotide metabolic process (GO:1900544)	49	2	0.2	+	10.08	0.018
positive regulation of G1/S transition of mitotic cell cycle (GO:1900087)	49	2	0.2	+	10.08	0.018
positive regulation of epithelial cell apoptotic process (GO:1904037)	49	2	0.2	+	10.08	0.018
positive regulation of nucleotide metabolic process (GO:0045981)	49	2	0.2	+	10.08	0.018
glial cell migration (GO:0008347)	50	2	0.2	+	9.88	0.0187
regulation of RNA metabolic process (GO:0051252)	3505	23	14.19	+	1.62	0.0191
positive regulation of transcription by RNA polymerase II (GO:0045944)	1278	11	5.17	+	2.13	0.0191
regulation of gene expression (GO:0010468)	4736	29	19.17	+	1.51	0.0192
multicellular organismal process (GO:0032501)	7704	42	31.19	+	1.35	0.0192
positive regulation of programmed cell death (GO:0043068)	668	7	2.7	+	2.59	0.0193
neuron maturation (GO:0042551)	51	2	0.21	+	9.69	0.0194
adipose tissue development (GO:0060612)	51	2	0.21	+	9.69	0.0194
positive regulation of calcium ion transport (GO:0051928)	138	3	0.56	+	5.37	0.0194
tube development (GO:0035295)	996	9	4.03	+	2.23	0.0199
regulation of testosterone secretion (GO:2000843)	4	1	0.02	+	61.75	0.02
rhombomere 5 development (GO:0021571)	4	1	0.02	+	61.75	0.02
regulation of activation of membrane attack complex (GO:0001969)	4	1	0.02	+	61.75	0.02
positive regulation of mitochondrial DNA metabolic process (GO:1901860)	4	1	0.02	+	61.75	0.02
angiotensin maturation (GO:0002003)	4	1	0.02	+	61.75	0.02
positive regulation of keratinocyte apoptotic process (GO:1902174)	4	1	0.02	+	61.75	0.02
termination of RNA polymerase I transcription (GO:0006363)	4	1	0.02	+	61.75	0.02
regulation of Rap protein signal transduction (GO:0032487)	4	1	0.02	+	61.75	0.02
regulation of chorionic trophoblast cell proliferation (GO:1901382)	4	1	0.02	+	61.75	0.02
cellular response to potassium ion starvation (GO:0051365)	4	1	0.02	+	61.75	0.02
positive regulation of hepatic stellate cell proliferation (GO:1904899)	4	1	0.02	+	61.75	0.02
ureter maturation (GO:0035799)	4	1	0.02	+	61.75	0.02
phosphatidylinositol acyl-chain remodeling (GO:0036149)	4	1	0.02	+	61.75	0.02
eye pigmentation (GO:0048069)	4	1	0.02	+	61.75	0.02
sequestering of triglyceride (GO:0030730)	4	1	0.02	+	61.75	0.02
amylin receptor signaling pathway (GO:0097647)	4	1	0.02	+	61.75	0.02
negative regulation of very-low-density lipoprotein particle clearance (GO:0010916)	4	1	0.02	+	61.75	0.02
regulation of very-low-density lipoprotein particle clearance (GO:0010915)	4	1	0.02	+	61.75	0.02
negative regulation of very-low-density lipoprotein particle remodeling (GO:0010903)	4	1	0.02	+	61.75	0.02
complement-mediated synapse pruning (GO:0150062)	4	1	0.02	+	61.75	0.02
nitrate metabolic process (GO:0042126)	4	1	0.02	+	61.75	0.02
negative regulation of protein transport (GO:0051224)	140	3	0.57	+	5.29	0.0202
regulation of canonical Wnt signaling pathway (GO:0060828)	253	4	1.02	+	3.91	0.0203
positive regulation of catabolic process (GO:0009896)	524	6	2.12	+	2.83	0.0203
tissue development (GO:0009888)	1849	14	7.49	+	1.87	0.0203
hexose biosynthetic process (GO:0019319)	53	2	0.21	+	9.32	0.0208
smooth muscle cell differentiation (GO:0051145)	53	2	0.21	+	9.32	0.0208
regulation of plasma lipoprotein particle levels (GO:0097006)	53	2	0.21	+	9.32	0.0208
positive regulation of cysteine-type endopeptidase activity (GO:2001056)	142	3	0.57	+	5.22	0.0209
import into cell (GO:0098657)	680	7	2.75	+	2.54	0.021
negative regulation of mitochondrion organization (GO:0010823)	54	2	0.22	+	9.15	0.0215
respiratory gaseous exchange by respiratory system (GO:0007585)	54	2	0.22	+	9.15	0.0215
anatomical structure formation involved in morphogenesis (GO:0048646)	1010	9	4.09	+	2.2	0.0216
positive regulation of RNA biosynthetic process (GO:1902680)	1612	13	6.53	+	1.99	0.022
fat cell differentiation (GO:0045444)	145	3	0.59	+	5.11	0.0221
positive regulation of cell adhesion (GO:0045785)	535	6	2.17	+	2.77	0.0222
membrane assembly (GO:0071709)	55	2	0.22	+	8.98	0.0222
regulation of cell migration (GO:0030334)	1016	9	4.11	+	2.19	0.0223
regulation of DNA-templated transcription (GO:0006355)	3185	21	12.89	+	1.63	0.0224
regulation of RNA biosynthetic process (GO:2001141)	3196	21	12.94	+	1.62	0.0227
peptide metabolic process (GO:0006518)	539	6	2.18	+	2.75	0.0229
positive regulation of acute inflammatory response (GO:0002675)	56	2	0.23	+	8.82	0.023
positive regulation of glucose transmembrane transport (GO:0010828)	56	2	0.23	+	8.82	0.023
positive regulation of cell communication (GO:0010647)	1891	14	7.66	+	1.83	0.023
positive regulation of signaling (GO:0023056)	1892	14	7.66	+	1.83	0.0231
ribose phosphate metabolic process (GO:0019693)	396	5	1.6	+	3.12	0.0231
muscle structure development (GO:0061061)	541	6	2.19	+	2.74	0.0233
regulation of programmed cell death (GO:0043067)	1655	13	6.7	+	1.94	0.0236
multicellular organismal-level homeostasis (GO:0048871)	697	7	2.82	+	2.48	0.0236
negative regulation of transmembrane receptor protein serine/threonine kinase signaling pathway (GO:0090101)	149	3	0.6	+	4.97	0.0236
fatty acid beta-oxidation (GO:0006635)	57	2	0.23	+	8.67	0.0237
regulation of hormone metabolic process (GO:0032350)	57	2	0.23	+	8.67	0.0237
glucose mediated signaling pathway (GO:0010255)	5	1	0.02	+	49.4	0.024
sugar mediated signaling pathway (GO:0010182)	5	1	0.02	+	49.4	0.024
negative regulation of glucocorticoid secretion (GO:2000850)	5	1	0.02	+	49.4	0.024
negative regulation of corticosteroid hormone secretion (GO:2000847)	5	1	0.02	+	49.4	0.024
negative regulation of steroid hormone secretion (GO:2000832)	5	1	0.02	+	49.4	0.024
regulation of metanephros development (GO:0072215)	5	1	0.02	+	49.4	0.024
regulation of ferroptosis (GO:0110075)	5	1	0.02	+	49.4	0.024
adenylate cyclase-inhibiting dopamine receptor signaling pathway (GO:0007195)	5	1	0.02	+	49.4	0.024
platelet activating factor biosynthetic process (GO:0006663)	5	1	0.02	+	49.4	0.024
regulation of inward rectifier potassium channel activity (GO:1901979)	5	1	0.02	+	49.4	0.024
regulation of entry of bacterium into host cell (GO:2000535)	5	1	0.02	+	49.4	0.024
cellular response to hyperoxia (GO:0071455)	5	1	0.02	+	49.4	0.024
positive regulation of clathrin-dependent endocytosis (GO:2000370)	5	1	0.02	+	49.4	0.024
caveola assembly (GO:0070836)	5	1	0.02	+	49.4	0.024
glycerol biosynthetic process (GO:0006114)	5	1	0.02	+	49.4	0.024
positive regulation of glomerulus development (GO:0090193)	5	1	0.02	+	49.4	0.024
negative regulation of protein kinase C signaling (GO:0090038)	5	1	0.02	+	49.4	0.024
negative regulation of pinocytosis (GO:0048550)	5	1	0.02	+	49.4	0.024
negative regulation of trophoblast cell migration (GO:1901164)	5	1	0.02	+	49.4	0.024
hexose mediated signaling (GO:0009757)	5	1	0.02	+	49.4	0.024
carbohydrate mediated signaling (GO:0009756)	5	1	0.02	+	49.4	0.024
fat cell proliferation (GO:0070341)	5	1	0.02	+	49.4	0.024
axial mesoderm morphogenesis (GO:0048319)	5	1	0.02	+	49.4	0.024
glial cell-derived neurotrophic factor receptor signaling pathway (GO:0035860)	5	1	0.02	+	49.4	0.024
oviduct epithelium development (GO:0035846)	5	1	0.02	+	49.4	0.024
positive regulation of memory T cell differentiation (GO:0043382)	5	1	0.02	+	49.4	0.024
fatty-acyl-CoA catabolic process (GO:0036115)	5	1	0.02	+	49.4	0.024
folic acid-containing compound catabolic process (GO:0009397)	5	1	0.02	+	49.4	0.024
negative regulation of metallopeptidase activity (GO:1905049)	5	1	0.02	+	49.4	0.024
pteridine-containing compound catabolic process (GO:0042560)	5	1	0.02	+	49.4	0.024
regulation of very-low-density lipoprotein particle remodeling (GO:0010901)	5	1	0.02	+	49.4	0.024
pentose-phosphate shunt, non-oxidative branch (GO:0009052)	5	1	0.02	+	49.4	0.024
negative regulation of triglyceride catabolic process (GO:0010897)	5	1	0.02	+	49.4	0.024
central nervous system segmentation (GO:0035283)	5	1	0.02	+	49.4	0.024
striated muscle atrophy (GO:0014891)	5	1	0.02	+	49.4	0.024
maintenance of protein location in mitochondrion (GO:0072656)	5	1	0.02	+	49.4	0.024
diacylglycerol catabolic process (GO:0046340)	5	1	0.02	+	49.4	0.024
cellular response to thyroid hormone stimulus (GO:0097067)	5	1	0.02	+	49.4	0.024
propionate metabolic process (GO:0019541)	5	1	0.02	+	49.4	0.024
caveolin-mediated endocytosis (GO:0072584)	5	1	0.02	+	49.4	0.024
positive regulation of signal transduction (GO:0009967)	1665	13	6.74	+	1.93	0.024
cellular response to chemical stimulus (GO:0070887)	2372	17	9.6	+	1.77	0.0241
complement activation (GO:0006956)	58	2	0.23	+	8.52	0.0245
modulation by symbiont of entry into host (GO:0052372)	58	2	0.23	+	8.52	0.0245
regulation of purine nucleotide catabolic process (GO:0033121)	58	2	0.23	+	8.52	0.0245
regulation of glycolytic process (GO:0006110)	58	2	0.23	+	8.52	0.0245
regulation of nucleotide catabolic process (GO:0030811)	58	2	0.23	+	8.52	0.0245
regulation of locomotion (GO:0040012)	1119	10	4.53	+	2.21	0.0247
eye development (GO:0001654)	403	5	1.63	+	3.06	0.0247
cellular response to peptide (GO:1901653)	270	4	1.09	+	3.66	0.0249
negative regulation of RNA metabolic process (GO:0051253)	1361	11	5.51	+	2	0.0252
embryonic epithelial tube formation (GO:0001838)	153	3	0.62	+	4.84	0.0253
visual system development (GO:0150063)	406	5	1.64	+	3.04	0.0254
ovulation cycle (GO:0042698)	60	2	0.24	+	8.23	0.026
response to nutrient levels (GO:0031667)	409	5	1.66	+	3.02	0.0261
sensory system development (GO:0048880)	410	5	1.66	+	3.01	0.0263
nucleobase-containing small molecule metabolic process (GO:0055086)	558	6	2.26	+	2.66	0.0265
negative regulation of establishment of protein localization (GO:1904950)	156	3	0.63	+	4.75	0.0265
anatomical structure development (GO:0048856)	5507	32	22.3	+	1.44	0.0265
negative regulation of macromolecule biosynthetic process (GO:0010558)	2065	15	8.36	+	1.79	0.0266
positive regulation of extrinsic apoptotic signaling pathway (GO:2001238)	61	2	0.25	+	8.1	0.0268
regulation of myelination (GO:0031641)	61	2	0.25	+	8.1	0.0268
negative regulation of insulin secretion (GO:0046676)	61	2	0.25	+	8.1	0.0268
monosaccharide biosynthetic process (GO:0046364)	61	2	0.25	+	8.1	0.0268
protein-containing complex assembly (GO:0065003)	1163	10	4.71	+	2.12	0.0272
epithelial tube formation (GO:0072175)	159	3	0.64	+	4.66	0.0278
regulation of generation of precursor metabolites and energy (GO:0043467)	159	3	0.64	+	4.66	0.0278
alditol biosynthetic process (GO:0019401)	6	1	0.02	+	41.17	0.0279
positive regulation of apoptotic DNA fragmentation (GO:1902512)	6	1	0.02	+	41.17	0.0279
B cell lineage commitment (GO:0002326)	6	1	0.02	+	41.17	0.0279
trophectodermal cell proliferation (GO:0001834)	6	1	0.02	+	41.17	0.0279
glutamate catabolic process (GO:0006538)	6	1	0.02	+	41.17	0.0279
regulation of cell communication by electrical coupling involved in cardiac conduction (GO:1901844)	6	1	0.02	+	41.17	0.0279
positive regulation of apoptotic cell clearance (GO:2000427)	6	1	0.02	+	41.17	0.0279
positive regulation of lamellipodium morphogenesis (GO:2000394)	6	1	0.02	+	41.17	0.0279
regulation of T-helper 17 cell lineage commitment (GO:2000328)	6	1	0.02	+	41.17	0.0279
negative regulation of calcium ion import across plasma membrane (GO:1905949)	6	1	0.02	+	41.17	0.0279
ethanol oxidation (GO:0006069)	6	1	0.02	+	41.17	0.0279
positive regulation of voltage-gated calcium channel activity (GO:1901387)	6	1	0.02	+	41.17	0.0279
regulation of glomerulus development (GO:0090192)	6	1	0.02	+	41.17	0.0279
regulation of membrane repolarization during action potential (GO:0098903)	6	1	0.02	+	41.17	0.0279
xylulose 5-phosphate biosynthetic process (GO:1901159)	6	1	0.02	+	41.17	0.0279
pexophagy (GO:0000425)	6	1	0.02	+	41.17	0.0279
xylulose 5-phosphate metabolic process (GO:0051167)	6	1	0.02	+	41.17	0.0279
negative regulation of lipoprotein lipase activity (GO:0051005)	6	1	0.02	+	41.17	0.0279
negative regulation of nitric-oxide synthase activity (GO:0051001)	6	1	0.02	+	41.17	0.0279
regulation of hepatic stellate cell proliferation (GO:1904897)	6	1	0.02	+	41.17	0.0279
10-formyltetrahydrofolate metabolic process (GO:0009256)	6	1	0.02	+	41.17	0.0279
response to hyperoxia (GO:0055093)	6	1	0.02	+	41.17	0.0279
regulation of peptidyl-tyrosine autophosphorylation (GO:1900084)	6	1	0.02	+	41.17	0.0279
positive regulation of lipoprotein particle clearance (GO:0010986)	6	1	0.02	+	41.17	0.0279
regulation of establishment of T cell polarity (GO:1903903)	6	1	0.02	+	41.17	0.0279
negative regulation of sequestering of triglyceride (GO:0010891)	6	1	0.02	+	41.17	0.0279
positive regulation of complement activation (GO:0045917)	6	1	0.02	+	41.17	0.0279
short-chain fatty acid catabolic process (GO:0019626)	6	1	0.02	+	41.17	0.0279
chylomicron remnant clearance (GO:0034382)	6	1	0.02	+	41.17	0.0279
membrane biogenesis (GO:0044091)	63	2	0.26	+	7.84	0.0284
positive regulation of receptor-mediated endocytosis (GO:0048260)	63	2	0.26	+	7.84	0.0284
positive regulation of cell cycle G1/S phase transition (GO:1902808)	63	2	0.26	+	7.84	0.0284
positive regulation of cell activation (GO:0050867)	421	5	1.7	+	2.93	0.029
response to mechanical stimulus (GO:0009612)	162	3	0.66	+	4.57	0.0292
positive regulation of endopeptidase activity (GO:0010950)	162	3	0.66	+	4.57	0.0292
regulation of intracellular signal transduction (GO:1902531)	1754	13	7.1	+	1.83	0.0297
regulation of signal transduction (GO:0009966)	3065	20	12.41	+	1.61	0.0303
regulation of the force of heart contraction by chemical signal (GO:0003057)	7	1	0.03	+	35.29	0.0318
negative regulation of autophagy of mitochondrion (GO:1903147)	7	1	0.03	+	35.29	0.0318
regulation of corticosterone secretion (GO:2000852)	7	1	0.03	+	35.29	0.0318
triglyceride-rich lipoprotein particle clearance (GO:0071830)	7	1	0.03	+	35.29	0.0318
lens induction in camera-type eye (GO:0060235)	7	1	0.03	+	35.29	0.0318
positive regulation of transforming growth factor beta1 production (GO:0032914)	7	1	0.03	+	35.29	0.0318
plasma membrane raft assembly (GO:0044854)	7	1	0.03	+	35.29	0.0318
oviduct development (GO:0060066)	7	1	0.03	+	35.29	0.0318
embryonic retina morphogenesis in camera-type eye (GO:0060059)	7	1	0.03	+	35.29	0.0318
positive regulation of protein glycosylation (GO:0060050)	7	1	0.03	+	35.29	0.0318
iron import into cell (GO:0033212)	7	1	0.03	+	35.29	0.0318
positive regulation of neuron maturation (GO:0014042)	7	1	0.03	+	35.29	0.0318
positive regulation of T-helper 17 cell differentiation (GO:2000321)	7	1	0.03	+	35.29	0.0318
transcription initiation at RNA polymerase I promoter (GO:0006361)	7	1	0.03	+	35.29	0.0318
negative regulation of mitophagy (GO:1901525)	7	1	0.03	+	35.29	0.0318
regulation of Cdc42 protein signal transduction (GO:0032489)	7	1	0.03	+	35.29	0.0318
positive regulation of transcription from RNA polymerase II promoter by glucose (GO:0000432)	7	1	0.03	+	35.29	0.0318
response to immobilization stress (GO:0035902)	7	1	0.03	+	35.29	0.0318
regulation of memory T cell differentiation (GO:0043380)	7	1	0.03	+	35.29	0.0318
phosphatidylethanolamine acyl-chain remodeling (GO:0036152)	7	1	0.03	+	35.29	0.0318
negative regulation of protein export from nucleus (GO:0046826)	7	1	0.03	+	35.29	0.0318
copper ion import (GO:0015677)	7	1	0.03	+	35.29	0.0318
hyaluronan biosynthetic process (GO:0030213)	7	1	0.03	+	35.29	0.0318
positive regulation of DNA catabolic process (GO:1903626)	7	1	0.03	+	35.29	0.0318
positive regulation of gap junction assembly (GO:1903598)	7	1	0.03	+	35.29	0.0318
cornified envelope assembly (GO:1903575)	7	1	0.03	+	35.29	0.0318
platelet activating factor metabolic process (GO:0046469)	7	1	0.03	+	35.29	0.0318
regulation of cholesterol import (GO:0060620)	7	1	0.03	+	35.29	0.0318
iris morphogenesis (GO:0061072)	7	1	0.03	+	35.29	0.0318
cellular response to external stimulus (GO:0071496)	292	4	1.18	+	3.38	0.0319
negative regulation of molecular function (GO:0044092)	912	8	3.69	+	2.17	0.0322
regulation of pattern recognition receptor signaling pathway (GO:0062207)	169	3	0.68	+	4.38	0.0324
regulation of biological process involved in symbiotic interaction (GO:0043903)	68	2	0.28	+	7.26	0.0325
nervous system process (GO:0050877)	2224	3	9	-	0.33	0.0327
regulation of nervous system development (GO:0051960)	588	6	2.38	+	2.52	0.033
tube formation (GO:0035148)	173	3	0.7	+	4.28	0.0344
embryo development (GO:0009790)	1241	10	5.02	+	1.99	0.0345
response to extracellular stimulus (GO:0009991)	442	5	1.79	+	2.79	0.0346
negative regulation of endopeptidase activity (GO:0010951)	174	3	0.7	+	4.26	0.0349
behavior (GO:0007610)	759	7	3.07	+	2.28	0.0351
positive regulation of toll-like receptor 3 signaling pathway (GO:0034141)	8	1	0.03	+	30.88	0.0357
positive regulation of transcription by glucose (GO:0046016)	8	1	0.03	+	30.88	0.0357
G protein-coupled adenosine receptor signaling pathway (GO:0001973)	8	1	0.03	+	30.88	0.0357
contact inhibition (GO:0060242)	8	1	0.03	+	30.88	0.0357
receptor-mediated endocytosis of virus by host cell (GO:0019065)	8	1	0.03	+	30.88	0.0357
estrous cycle (GO:0044849)	8	1	0.03	+	30.88	0.0357
negative regulation of cAMP-dependent protein kinase activity (GO:2000480)	8	1	0.03	+	30.88	0.0357
regulation of apoptotic cell clearance (GO:2000425)	8	1	0.03	+	30.88	0.0357
regulation of angiotensin levels in blood (GO:0002002)	8	1	0.03	+	30.88	0.0357
regulation of keratinocyte apoptotic process (GO:1902172)	8	1	0.03	+	30.88	0.0357
protein targeting to vacuole involved in autophagy (GO:0071211)	8	1	0.03	+	30.88	0.0357
regulation of peptidyl-cysteine S-nitrosylation (GO:2000169)	8	1	0.03	+	30.88	0.0357
synapse pruning (GO:0098883)	8	1	0.03	+	30.88	0.0357
negative regulation of hydrogen peroxide-mediated programmed cell death (GO:1901299)	8	1	0.03	+	30.88	0.0357
carbon catabolite activation of transcription from RNA polymerase II promoter (GO:0000436)	8	1	0.03	+	30.88	0.0357
regulation of transcription from RNA polymerase II promoter by glucose (GO:0000430)	8	1	0.03	+	30.88	0.0357
long-chain fatty acid catabolic process (GO:0042758)	8	1	0.03	+	30.88	0.0357
G protein-coupled purinergic receptor signaling pathway (GO:0035588)	8	1	0.03	+	30.88	0.0357
calcitonin family receptor signaling pathway (GO:0097646)	8	1	0.03	+	30.88	0.0357
negative regulation of low-density lipoprotein particle clearance (GO:0010989)	8	1	0.03	+	30.88	0.0357
positive regulation of programmed necrotic cell death (GO:0062100)	8	1	0.03	+	30.88	0.0357
negative regulation of RIG-I signaling pathway (GO:0039536)	8	1	0.03	+	30.88	0.0357
folic acid metabolic process (GO:0046655)	8	1	0.03	+	30.88	0.0357
muscle atrophy (GO:0014889)	8	1	0.03	+	30.88	0.0357
response to thyroid hormone (GO:0097066)	8	1	0.03	+	30.88	0.0357
cellular localization (GO:0051641)	2747	18	11.12	+	1.62	0.0358
negative regulation of peptide hormone secretion (GO:0090278)	72	2	0.29	+	6.86	0.036
regulation of carbohydrate catabolic process (GO:0043470)	72	2	0.29	+	6.86	0.036
regulation of cardiac muscle contraction (GO:0055117)	72	2	0.29	+	6.86	0.036
organic hydroxy compound transport (GO:0015850)	177	3	0.72	+	4.19	0.0364
alcohol metabolic process (GO:0006066)	306	4	1.24	+	3.23	0.0368
apoptotic process (GO:0006915)	1024	9	4.15	+	2.17	0.0372
morphogenesis of embryonic epithelium (GO:0016331)	179	3	0.72	+	4.14	0.0374
regulation of apoptotic process (GO:0042981)	1604	12	6.49	+	1.85	0.0378
regulation of nitric oxide biosynthetic process (GO:0045428)	74	2	0.3	+	6.68	0.0378
circadian regulation of gene expression (GO:0032922)	74	2	0.3	+	6.68	0.0378
negative regulation of peptide secretion (GO:0002792)	74	2	0.3	+	6.68	0.0378
establishment of protein localization (GO:0045184)	1269	10	5.14	+	1.95	0.0379
positive regulation of cellular component organization (GO:0051130)	1272	10	5.15	+	1.94	0.0383
positive regulation of transport (GO:0051050)	1039	9	4.21	+	2.14	0.0384
cellular response to endogenous stimulus (GO:0071495)	1044	9	4.23	+	2.13	0.0388
central nervous system maturation (GO:0021626)	9	1	0.04	+	27.44	0.0396
regulation of cell adhesion molecule production (GO:0060353)	9	1	0.04	+	27.44	0.0396
positive regulation of cysteine-type endopeptidase activity involved in apoptotic signaling pathway (GO:2001269)	9	1	0.04	+	27.44	0.0396
rhombomere development (GO:0021546)	9	1	0.04	+	27.44	0.0396
detection of cell density (GO:0060245)	9	1	0.04	+	27.44	0.0396
positive regulation of endocytic recycling (GO:2001137)	9	1	0.04	+	27.44	0.0396
regulation of lamellipodium morphogenesis (GO:2000392)	9	1	0.04	+	27.44	0.0396
negative regulation of mitochondrial fission (GO:0090258)	9	1	0.04	+	27.44	0.0396
voluntary musculoskeletal movement (GO:0050882)	9	1	0.04	+	27.44	0.0396
positive regulation of steroid hormone biosynthetic process (GO:0090031)	9	1	0.04	+	27.44	0.0396
carbon catabolite regulation of transcription from RNA polymerase II promoter (GO:0000429)	9	1	0.04	+	27.44	0.0396
intracellular triglyceride homeostasis (GO:0035356)	9	1	0.04	+	27.44	0.0396
regulation of cardiac muscle cell membrane potential (GO:0086036)	9	1	0.04	+	27.44	0.0396
positive regulation of sequestering of triglyceride (GO:0010890)	9	1	0.04	+	27.44	0.0396
early endosome to Golgi transport (GO:0034498)	9	1	0.04	+	27.44	0.0396
carbon catabolite activation of transcription (GO:0045991)	9	1	0.04	+	27.44	0.0396
positive regulation of cell fate commitment (GO:0010455)	9	1	0.04	+	27.44	0.0396
endocytic recycling (GO:0032456)	76	2	0.31	+	6.5	0.0396
MAPK cascade (GO:0000165)	184	3	0.74	+	4.03	0.04
regulation of cysteine-type endopeptidase activity involved in apoptotic process (GO:0043281)	185	3	0.75	+	4.01	0.0405
regulation of nitric oxide metabolic process (GO:0080164)	77	2	0.31	+	6.42	0.0405
positive regulation of peptidase activity (GO:0010952)	186	3	0.75	+	3.98	0.0411
regulation of acute inflammatory response (GO:0002673)	78	2	0.32	+	6.33	0.0415
muscle cell differentiation (GO:0042692)	319	4	1.29	+	3.1	0.0417
regulation of cell motility (GO:2000145)	1075	9	4.35	+	2.07	0.0418
adult behavior (GO:0030534)	188	3	0.76	+	3.94	0.0422
programmed cell death (GO:0012501)	1079	9	4.37	+	2.06	0.0422
cell death (GO:0008219)	1080	9	4.37	+	2.06	0.0423
receptor internalization (GO:0031623)	79	2	0.32	+	6.25	0.0424
regulation of Wnt signaling pathway (GO:0030111)	322	4	1.3	+	3.07	0.0429
positive regulation of intracellular signal transduction (GO:1902533)	1088	9	4.4	+	2.04	0.0432
protein homooligomerization (GO:0051260)	190	3	0.77	+	3.9	0.0433
positive regulation of neurogenesis (GO:0050769)	323	4	1.31	+	3.06	0.0433
cranial nerve formation (GO:0021603)	10	1	0.04	+	24.7	0.0435
adenylate cyclase-activating dopamine receptor signaling pathway (GO:0007191)	10	1	0.04	+	24.7	0.0435
neuron cell-cell adhesion (GO:0007158)	10	1	0.04	+	24.7	0.0435
mammary gland involution (GO:0060056)	10	1	0.04	+	24.7	0.0435
regulation of mitochondrial DNA metabolic process (GO:1901858)	10	1	0.04	+	24.7	0.0435
positive regulation of hepatic stellate cell activation (GO:2000491)	10	1	0.04	+	24.7	0.0435
negative regulation of monooxygenase activity (GO:0032769)	10	1	0.04	+	24.7	0.0435
protein demethylation (GO:0006482)	10	1	0.04	+	24.7	0.0435
maintenance of epithelial cell apical/basal polarity (GO:0045199)	10	1	0.04	+	24.7	0.0435
immunoglobulin V(D)J recombination (GO:0033152)	10	1	0.04	+	24.7	0.0435
endocytosis involved in viral entry into host cell (GO:0075509)	10	1	0.04	+	24.7	0.0435
protein localization to perinuclear region of cytoplasm (GO:1905719)	10	1	0.04	+	24.7	0.0435
positive regulation of extracellular matrix disassembly (GO:0090091)	10	1	0.04	+	24.7	0.0435
hepatocyte differentiation (GO:0070365)	10	1	0.04	+	24.7	0.0435
aggrephagy (GO:0035973)	10	1	0.04	+	24.7	0.0435
relaxation of cardiac muscle (GO:0055119)	10	1	0.04	+	24.7	0.0435
response to glycoprotein (GO:1904587)	10	1	0.04	+	24.7	0.0435
ADP transport (GO:0015866)	10	1	0.04	+	24.7	0.0435
positive regulation of triglyceride catabolic process (GO:0010898)	10	1	0.04	+	24.7	0.0435
protein dealkylation (GO:0008214)	10	1	0.04	+	24.7	0.0435
regulation of gap junction assembly (GO:1903596)	10	1	0.04	+	24.7	0.0435
carbon catabolite regulation of transcription (GO:0045990)	10	1	0.04	+	24.7	0.0435
renal protein absorption (GO:0097017)	10	1	0.04	+	24.7	0.0435
cellular response to granulocyte macrophage colony-stimulating factor stimulus (GO:0097011)	10	1	0.04	+	24.7	0.0435
diaphragm development (GO:0060539)	10	1	0.04	+	24.7	0.0435
negative regulation of hydrolase activity (GO:0051346)	325	4	1.32	+	3.04	0.0442
T cell differentiation in thymus (GO:0033077)	81	2	0.33	+	6.1	0.0443
positive regulation of neural precursor cell proliferation (GO:2000179)	81	2	0.33	+	6.1	0.0443
regulation of cellular response to growth factor stimulus (GO:0090287)	326	4	1.32	+	3.03	0.0446
regulation of cellular localization (GO:0060341)	1100	9	4.45	+	2.02	0.0447
neural tube development (GO:0021915)	195	3	0.79	+	3.8	0.0461
response to retinoic acid (GO:0032526)	83	2	0.34	+	5.95	0.0463
response to insulin (GO:0032868)	196	3	0.79	+	3.78	0.0466
regulation of system process (GO:0044057)	642	6	2.6	+	2.31	0.047
negative regulation of erythrocyte differentiation (GO:0045647)	11	1	0.04	+	22.45	0.0473
lipoxygenase pathway (GO:0019372)	11	1	0.04	+	22.45	0.0473
purine nucleoside bisphosphate catabolic process (GO:0034034)	11	1	0.04	+	22.45	0.0473
ribonucleoside bisphosphate catabolic process (GO:0034031)	11	1	0.04	+	22.45	0.0473
membrane raft assembly (GO:0001765)	11	1	0.04	+	22.45	0.0473
plasma membrane raft organization (GO:0044857)	11	1	0.04	+	22.45	0.0473
cAMP biosynthetic process (GO:0006171)	11	1	0.04	+	22.45	0.0473
negative regulation of protein autophosphorylation (GO:0031953)	11	1	0.04	+	22.45	0.0473
positive regulation of kidney development (GO:0090184)	11	1	0.04	+	22.45	0.0473
negative regulation of myelination (GO:0031642)	11	1	0.04	+	22.45	0.0473
positive regulation of insulin-like growth factor receptor signaling pathway (GO:0043568)	11	1	0.04	+	22.45	0.0473
axial mesoderm development (GO:0048318)	11	1	0.04	+	22.45	0.0473
sequestering of actin monomers (GO:0042989)	11	1	0.04	+	22.45	0.0473
behavioral response to ethanol (GO:0048149)	11	1	0.04	+	22.45	0.0473
purinergic nucleotide receptor signaling pathway (GO:0035590)	11	1	0.04	+	22.45	0.0473
negative regulation of lipoprotein particle clearance (GO:0010985)	11	1	0.04	+	22.45	0.0473
ether lipid biosynthetic process (GO:0008611)	11	1	0.04	+	22.45	0.0473
cell junction disassembly (GO:0150146)	11	1	0.04	+	22.45	0.0473
lipid phosphorylation (GO:0046834)	11	1	0.04	+	22.45	0.0473
negative regulation of voltage-gated potassium channel activity (GO:1903817)	11	1	0.04	+	22.45	0.0473
maintenance of apical/basal cell polarity (GO:0035090)	11	1	0.04	+	22.45	0.0473
glycerol ether biosynthetic process (GO:0046504)	11	1	0.04	+	22.45	0.0473
response to granulocyte macrophage colony-stimulating factor (GO:0097012)	11	1	0.04	+	22.45	0.0473
nucleoside bisphosphate catabolic process (GO:0033869)	11	1	0.04	+	22.45	0.0473
cellular nitrogen compound biosynthetic process (GO:0044271)	1436	11	5.81	+	1.89	0.048
regulation of neurogenesis (GO:0050767)	487	5	1.97	+	2.54	0.0488
positive regulation of endocytosis (GO:0045807)	200	3	0.81	+	3.71	0.049
cellular response to organonitrogen compound (GO:0071417)	489	5	1.98	+	2.53	0.0495
lymphocyte differentiation (GO:0030098)	338	4	1.37	+	2.92	0.0496

## Sheet: Supplementary File 3f
Trajectory	Cell_type	cell_type_boundary	Gene	Module	Pvalue	Pvalue_adjusted	tradeSeq_gene_for_boundary	eQTL_Al_Barghouthi	sQTL_Abood	IMPC_BMD_gene	DO_eGene	Number_neighbors	Number_tradeSeq_gene_neighbors	Ratio_tradeSeq_gene_neighbors	Number_genes_in_module	not_neib_in_trade	in_neib_not_trade	not_neib_not_trade	num_trade_genes_inMod	Number_outgoing_edges	All_network_neighbors	Neighbors_eQTL_Al_Barghouthi	Neighbors_sQTL_Abood	Neighbors_IMPC_BMD_gene	Neighbors_DO_eGene	Neighbors_tradeSeq_gene_for_boundary
1	LMP	LMP_to_OBP	Tet1	P1_I22_M12	4.26069e-05	0.00213595	FALSE	TRUE	FALSE	TRUE	FALSE	15	6	0.4	169	33	9	122	39	2	Tet1, Wtip, Tmem65, Notch3, Fibin, Odc1, Kansl1l, Mtss1l, Pgf, Fam189a2, Dennd4a, Plod2, Ankrd44, Kdm7a, Esyt1	Tet1, Fibin		Tet1, Fibin, Odc1, Ankrd44		Wtip, Tmem65, Mtss1l, Fam189a2, Plod2, Kdm7a
1	LMP	LMP_to_OBP	Tpx2	P1_I22_M16	2.1586e-09	5.70204e-07	TRUE	TRUE	FALSE	TRUE	FALSE	14	9	0.642857	116	43	5	60	51	1	Tpx2, Kif23, Top2a, Kif4, Cep44, Iqgap3, Papss1, Prc1, Kif11, Ect2, Hnrnph3, Kif15, Sgo2a, Ube2c	Tpx2		Tpx2, Top2a, Papss1, Ube2c		Tpx2, Top2a, Kif4, Iqgap3, Prc1, Kif11, Ect2, Sgo2a, Ube2c
1	LMP	LMP_to_OBP	Olfml3	P1_I22_M23	0.000268256	0.00964599	TRUE	TRUE	FALSE	FALSE	FALSE	20	6	0.3	111	9	14	83	14	2	Olfml3, Rcn3, Serpinf1, Cercam, Mxra8, Fkbp9, Vkorc1, Sar1a, Ctsh, Tmem245, Ggcx, Tmem59, Fam114a1, Ccpg1, Gpx7, Izumo4, Ube2j1, Fut2, Kdelr1, Gramd3	Olfml3	Mxra8, Izumo4	Ctsh, Fam114a1, Ube2j1		Olfml3, Rcn3, Mxra8, Fkbp9, Ctsh, Fam114a1
1	LMP	LMP_to_OBP	Sec24d	P1_I22_M8	3.70841e-05	0.00202138	FALSE	TRUE	FALSE	FALSE	FALSE	28	8	0.285714	168	27	20	114	35	5	Sec24d, Maged1, Copg1, Rpn1, Chsy1, Sec23a, Tmem39a, Sncaip, Txndc5, Entpd7, Snd1, Aldh18a1, Creb3l1, Tmem263, Ccdc80, Cyp26b1, St8sia2, Megf8, Epha2, Sec61a1, Gm45833, 1600012H06Rik, Phf10, Fkbp10, Kdelr3, Rcor2, Thbs1, Postn	Sec24d, Tmem263, Cyp26b1	Tmem263	Txndc5, Snd1, Epha2, Fkbp10, Postn		Maged1, Chsy1, Sncaip, Creb3l1, Tmem263, Ccdc80, Thbs1, Postn
1	LMP	LMP_to_OBP	Tmem263	P1_I22_M8	6.74933e-08	8.91431e-06	TRUE	TRUE	TRUE	FALSE	FALSE	24	10	0.416667	168	25	14	120	34	2	Tmem263, Sec23a, Kdelr3, Rcor2, Creb3l1, Sec24d, Ccdc80, Gipc2, Dpysl2, Cryab, Lmf2, Fkbp10, Maged1, Copg1, Rpn1, Chsy1, Tmem39a, Thbs1, Postn, Crybb1, Gmppa, 2900026A02Rik, P3h1, Ppt2	Tmem263, Sec24d	Tmem263, Lmf2, 2900026A02Rik	Fkbp10, Postn, P3h1		Tmem263, Creb3l1, Ccdc80, Dpysl2, Cryab, Maged1, Chsy1, Thbs1, Postn, 2900026A02Rik
1	LMP	LMP_to_OBP	Tln2	P3_I4_M4	0.000195703	0.00763686	FALSE	TRUE	FALSE	FALSE	FALSE	19	6	0.315789	68	12	13	38	18	1	Tln2, Atp2b4, Col12a1, Tns1, Xylt1, Fam172a, Pappa2, Srpx, Ulk2, Ypel4, Large1, Usf3, Oat, Uggt1, Nid2, Mettl9, Pmp22, Lrrk2, Ankrd29	Tln2, Usf3		Atp2b4, Nid2	Tns1	Atp2b4, Col12a1, Pappa2, Srpx, Nid2, Pmp22
1	OBP	OBP_to_OB1	Kremen1	P1_I12_M16	0.000307805	0.0203114	TRUE	TRUE	FALSE	FALSE	FALSE	13	8	0.615385	138	36	5	90	43	1	Kremen1, Pgrmc1, Plec, Inhbb, Actg1, Lmna, Hmgcr, Ppm1e, Msn, Tcf7, Tagln2, Mmp14, Me2	Kremen1, Mmp14	Mmp14	Lmna		Kremen1, Plec, Inhbb, Actg1, Lmna, Ppm1e, Tagln2, Mmp14
2	OBP	OBP_to_OB2	Kremen1	P1_I12_M16	0.00130364	0.0414942	TRUE	TRUE	FALSE	FALSE	FALSE	13	8	0.615385	138	41	5	85	48	1	Kremen1, Pgrmc1, Plec, Inhbb, Actg1, Lmna, Hmgcr, Ppm1e, Msn, Tcf7, Tagln2, Mmp14, Me2	Kremen1, Mmp14	Mmp14	Lmna		Kremen1, Plec, Inhbb, Actg1, Lmna, Tcf7, Tagln2, Mmp14
2	OBP	OBP_to_OB2	Lrp4	P1_I12_M7	4.80377e-06	0.000356071	TRUE	TRUE	FALSE	FALSE	FALSE	21	14	0.666667	176	117	7	39	130	1	Lrp4, Camkk2, Tipin, Gm10053, Rpa2, Anapc15, Mcm5, Gins2, Polq, Pcna-ps2, Mcm2, Lsm5, Mcm3, Nasp, Fignl1, Rpa1, Ccne1, Syngr1, Gm28285, Wdhd1, Cdc6	Lrp4		Anapc15, Wdhd1		Lrp4, Camkk2, Tipin, Mcm5, Gins2, Mcm2, Lsm5, Mcm3, Nasp, Fignl1, Rpa1, Ccne1, Wdhd1, Cdc6
3	LMP	LMP_to_MALP	Fgfrl1	P1_I22_M20	0.000160407	0.00754574	FALSE	TRUE	FALSE	FALSE	FALSE	14	6	0.428571	72	15	8	44	21	1	Fgfrl1, Hnmt, Cfap100, Lpl, St5, Umad1, Epb41l4b, Plpp3, Igfbp4, Cyp1b1, Chrdl1, Pdzrn4, Mark1, Tgfbr3	Fgfrl1, Cfap100	Cfap100, Plpp3			Hnmt, St5, Igfbp4, Cyp1b1, Pdzrn4, Mark1
3	LMP	LMP_to_MALP	Rhoj	P2_I8_M13	6.03226e-05	0.00342047	TRUE	TRUE	TRUE	FALSE	FALSE	17	7	0.411765	106	34	10	56	40	3	Rhoj, Fabp4, Agtrap, C1s2, Nnmt, Ptx3, 2610002M06Rik, Mturn, Serping1, Adam9, Amotl2, Matn2, Plppr3, Slc25a17, Fat4, Aldh1l1, Tnfrsf1a	Rhoj	Rhoj	Mturn, Aldh1l1, Tnfrsf1a		Rhoj, Fabp4, Ptx3, Serping1, Adam9, Amotl2, Fat4
3	LMP	LMP_to_MALP	Tln2	P3_I4_M4	1.44105e-05	0.00117823	TRUE	TRUE	FALSE	FALSE	FALSE	19	8	0.421053	68	19	11	31	26	1	Tln2, Atp2b4, Col12a1, Tns1, Xylt1, Fam172a, Pappa2, Srpx, Ulk2, Ypel4, Large1, Usf3, Oat, Uggt1, Nid2, Mettl9, Pmp22, Lrrk2, Ankrd29	Tln2, Usf3		Atp2b4, Nid2	Tns1	Tln2, Atp2b4, Col12a1, Tns1, Pappa2, Srpx, Large1, Pmp22
3	MALP	MALP_to_end	Fgfrl1	P1_I18_M18	0.00107706	0.0250083	TRUE	TRUE	FALSE	FALSE	FALSE	18	11	0.611111	108	52	7	39	62	3	Fgfrl1, Smo, Smpdl3a, Nid1, Cdc42ep2, Pde1a, Igfbp3, Slc26a7, Acss3, Lamb1, Fdx1, Echs1, Angpt1, Negr1, Ifngr1, Txlng, Pdp2, Slc43a3	Fgfrl1, Negr1	Negr1	Smo, Negr1		Fgfrl1, Smpdl3a, Pde1a, Igfbp3, Acss3, Echs1, Negr1, Ifngr1, Txlng, Pdp2, Slc43a3
1	LMP	LMP_to_OBP	Cdk1	P1_I22_M16	2.68996e-14	4.61866e-11	TRUE	FALSE	TRUE	FALSE	FALSE	21	14	0.666667	116	38	7	58	51	2	Cdk1, Ccna2, Plk4, Birc5, Plk1, Mis18bp1, Ect2, Cit, Cks2, Ndc80, Cdc20, Kif22, Nt5dc2, Kif18a, Bora, Bub1b, Kif4, Fam83d, Knstrn, Kif2c, Mki67		Cdk1	Plk1, Nt5dc2, Kif2c		Cdk1, Ccna2, Plk4, Plk1, Mis18bp1, Ect2, Cit, Cks2, Ndc80, Kif4, Fam83d, Knstrn, Kif2c, Mki67
1	LMP	LMP_to_OBP	Ttyh3	P1_I22_M2	8.05283e-10	2.63366e-07	TRUE	FALSE	TRUE	FALSE	FALSE	13	9	0.692308	370	68	4	290	76	2	Ttyh3, Triqk, Nek1, Grb10, Dnajb4, Egln1, Ctnnd1, Setd5, Serpine1, Eno2, Ugp2, Pgam1, Bmt2		Ttyh3	Nek1, Dnajb4		Ttyh3, Grb10, Dnajb4, Egln1, Ctnnd1, Serpine1, Eno2, Ugp2, Pgam1
1	LMP	LMP_to_OBP	Izumo4	P1_I22_M23	0.00170956	0.0446435	FALSE	FALSE	TRUE	FALSE	FALSE	19	5	0.263158	111	10	14	83	15	1	Izumo4, Gm13411, Vkorc1, Pcbd1, Gpx3, Ostf1, Gpx7, Rcn3, Aga, Pcolce, Pld3, Optn, Fam234a, Erp44, Cercam, Olfml3, Mxra8, Fkbp9, Sar1a	Olfml3	Izumo4, Mxra8	Erp44		Gpx3, Rcn3, Olfml3, Mxra8, Fkbp9
1	LMP	LMP_to_OBP	Lmf2	P1_I22_M8	0.000617324	0.0178142	FALSE	FALSE	TRUE	FALSE	FALSE	23	6	0.26087	168	29	17	117	35	2	Lmf2, P3h1, Ppt2, Rcor2, Sec16a, Impdh1, Glt8d1, Slc38a10, Sbf1, Tmem263, Dpysl2, Cryab, Cyp26b1, Hacd1, Fkbp11, Slc2a13, Slc35a2, Chst11, Slc35e1, Sec23a, Kdelr3, Gmppa, 2900026A02Rik	Tmem263, Cyp26b1	Lmf2, Glt8d1, Sbf1, Tmem263, 2900026A02Rik	P3h1, Slc38a10, Hacd1		Slc38a10, Tmem263, Dpysl2, Cryab, Chst11, 2900026A02Rik
2	OBP	OBP_to_OB2	Ebf1	P1_I12_M32	0.000632076	0.0229541	TRUE	FALSE	TRUE	FALSE	FALSE	23	12	0.521739	81	15	11	44	26	1	Ebf1, Fhl2, Limch1, Mrps6, Tcf7l2, Tnc, Colec12, Acadm, Apol6, Ahcyl1, Foxo1, Apbb2, Foxd1, Ptx3, Comp, Bmp5, Thbs4, Gm26669, AU021092, Csf1, C1galt1, Neo1, Tead2	Tcf7l2	Ebf1, Tcf7l2	Tcf7l2, Foxo1, AU021092		Ebf1, Fhl2, Limch1, Mrps6, Tnc, Colec12, Ahcyl1, Ptx3, Bmp5, Thbs4, AU021092, Csf1
3	LMP	LMP_to_MALP	Ttyh3	P1_I22_M2	6.73776e-06	0.000690671	TRUE	FALSE	TRUE	FALSE	FALSE	13	7	0.538462	370	39	6	319	45	2	Ttyh3, Triqk, Nek1, Grb10, Dnajb4, Egln1, Ctnnd1, Setd5, Serpine1, Eno2, Ugp2, Pgam1, Bmt2		Ttyh3	Nek1, Dnajb4		Ttyh3, Grb10, Dnajb4, Egln1, Ctnnd1, Serpine1, Ugp2
3	LMP	LMP_to_MALP	Ebf1	P1_I22_M21	1.98739e-08	9.74957e-06	TRUE	FALSE	TRUE	FALSE	FALSE	21	11	0.52381	97	15	10	62	25	4	Ebf1, Nxt2, S1pr1, Apoe, Nrp1, Mrps6, Pdgfra, Tshz2, Scp2, Samhd1, Fmo2, Echs1, Slc5a3, Fam13a, Ifngr1, Arhgap42, Klhl13, Itpka, Col4a1, Arrdc4, Cmbl		Ebf1			Ebf1, S1pr1, Nrp1, Mrps6, Scp2, Samhd1, Fmo2, Slc5a3, Fam13a, Col4a1, Arrdc4
3	LMP	LMP_to_MALP	Ppp1r12b	P2_I8_M13	5.52525e-11	9.48686e-08	TRUE	FALSE	TRUE	FALSE	FALSE	21	13	0.619048	106	28	8	58	40	4	Ppp1r12b, Pak3, Cited2, Ephx2, Mylk, Ddr1, Dclk1, Matn2, Dhrs3, Anxa6, Ecm2, Synpo2, Aldh1l1, Lpar4, Ptx3, Pros1, Clip3, App, Sgce, Serping1, Naaa		Ppp1r12b	Ddr1, Anxa6, Aldh1l1		Ppp1r12b, Cited2, Mylk, Dclk1, Dhrs3, Anxa6, Synpo2, Lpar4, Ptx3, Pros1, App, Sgce, Serping1
3	MALP	MALP_to_end	Adh1	P1_I18_M18	0.000153385	0.00442547	TRUE	FALSE	TRUE	FALSE	FALSE	20	13	0.65	108	50	7	39	62	1	Adh1, Pdp2, Rcbtb2, Adamts15, Glul, Acss3, Qpct, Pgrmc1, Timp4, Aldh2, Angptl4, Txlng, Smpdl3a, Fdx1, Ginm1, Ccdc71l, Ssbp2, Itga8, Atp6ap2, Ndrg2	Qpct	Adh1	Aldh2, Angptl4, Ssbp2		Adh1, Pdp2, Rcbtb2, Glul, Acss3, Timp4, Aldh2, Angptl4, Txlng, Smpdl3a, Ginm1, Atp6ap2, Ndrg2
3	MALP	MALP_to_end	Adcy5	P1_I18_M3	1.05011e-11	8.53387e-09	TRUE	FALSE	TRUE	FALSE	FALSE	18	18	1	231	197	0	17	214	1	Adcy5, Slc25a25, Lipe, Etv3, B430219N15Rik, Lpin1, Neat1, Cidec, Pnpla2, Pank3, Jade1, Brd2, Elmod2, 1190005I06Rik, Sqstm1, Acvr1c, Cfd, Pdzd2		Adcy5	Lipe, Etv3, Pank3, Brd2, Elmod2, Acvr1c		Adcy5, Slc25a25, Lipe, Etv3, B430219N15Rik, Lpin1, Neat1, Cidec, Pnpla2, Pank3, Jade1, Brd2, Elmod2, 1190005I06Rik, Sqstm1, Acvr1c, Cfd, Pdzd2
3	MALP	MALP_to_end	Cnn2	P2_I4_M9	0.00199159	0.0409747	TRUE	FALSE	TRUE	FALSE	FALSE	19	11	0.578947	89	13	8	58	23	3	Cnn2, Myl9, Tgfb1i1, Pdlim7, Tubb5, Myl6, Ccnd3, Acta2, Ilk, Mrpl2, Lgals1, Dpp3, Actb, Emc10, Csrp1, Arpc5, Anxa2, Cdk16, March2		Cnn2	Tgfb1i1		Cnn2, Myl9, Tgfb1i1, Pdlim7, Tubb5, Myl6, Acta2, Lgals1, Actb, Csrp1, Anxa2
3	MALP	MALP_to_end	Mxra8	P5_I5_M2	9.82851e-05	0.00307204	TRUE	FALSE	TRUE	FALSE	FALSE	15	11	0.733333	49	10	4	25	20	1	Mxra8, Mmp23, Col6a2, Pcolce, Timp2, Efemp2, Rcn1, Mrgprf, Serpinf1, Fam69b, Prrx2, Ddit4l, Edil3, Ptx3, Col3a1		Mxra8, Timp2	Timp2		Mxra8, Mmp23, Col6a2, Pcolce, Timp2, Efemp2, Rcn1, Serpinf1, Ddit4l, Ptx3, Col3a1
3	MALP	MALP_to_end	Timp2	P5_I5_M2	0.000411943	0.0102481	TRUE	FALSE	TRUE	TRUE	FALSE	19	12	0.631579	49	9	7	22	20	4	Timp2, Fam69b, Prrx2, Ddit4l, Mmp23, Edil3, Gm15867, Col12a1, Vti1b, Mxra8, Pcolce, Efemp2, Dkk3, Col3a1, Aspn, Col6a2, Mrgprf, Serpinf1, Ptx3		Timp2, Mxra8	Timp2		Timp2, Ddit4l, Mmp23, Col12a1, Mxra8, Pcolce, Efemp2, Col3a1, Aspn, Col6a2, Serpinf1, Ptx3

## Sheet: Supplementary File 3g
Gene	BC	EC	MPC	GC	LMP	MALP	MO	MF1	MF2	OB1	OB2	OBP	OC	Ocy	TC
Xkr4	0	0.941337	0.466325	0	0	0.180884	0	0	0	0	0	0	0	0	0
Mrpl15	0	0.199316	0	0	0.393925	0.179615	0	0	0	0	0	0.143059	0.196323	0	0
Lypla1	0	0.132549	0	0	0.0932162	0.148705	0	0	0	0.12873	0	0.228824	0	0.0532328	0
Gm37988	0	0	0	0	0.498692	0.219341	0	0	0	0.251572	0	0.147741	0	0.363365	0
Tcea1	0.0270451	0.0476903	0	0	0.28117	0.126108	0	0	0	0.0274577	0.142117	0.117406	0	0.0469757	0
Rgs20	0	0.0370221	0.0734205	0	0.56628	0.722616	0	0	0	0	0	0	0	0	0.0270544
Atp6v1h	0	0	0	0	0	0	0.319256	0.322386	0.586751	0	0	0	0.474888	0	0
Rb1cc1	0.00901503	0.119547	0	0.103559	0	0.00925467	0.0102067	0	0	0.308533	0.302754	0	0	0.303549	0.0194058
4732440D04Rik	0.0090985	0	0	0.344554	0	0.138182	0	0	0	0.178865	0	0	0.106967	0.158639	0.423042
Alkal1	0	0	0	0	0.571109	0	0	0	0	0	0.867803	0	0	0.465724	0
St18	0	0	0	0	0	0	0.160953	0.417293	0.809652	0	0	0	0.960295	0	0
Pcmtd1	0	0.109324	0	0	0.126889	0.468031	0	0	0	0.08771	0.172473	0	0	0.24098	0
Gm26901	0	0	0	0	0	0	0	0	0	0.334458	0.321447	0.357024	0	0.374703	0
Sntg1	0	0	0	0	0.684609	0	0	0	0	0.000271003	0	0.354494	0	0.652154	0
Rrs1	0	0.0987596	0	0	0.299187	0.150665	0.220392	0.00808101	0.0381759	0	0	0	0	0	0
Adhfe1	0	0	0	0.0830841	0	0.848909	0.441501	0	0	0	0	0	0	0	0
Mybl1	0	0	0.139684	0	0.537139	0	0	0	0	0	0	0	0	0	0
Vcpip1	0	0.140633	0	0	0.0317234	0.152023	0.155309	0	0.0548759	0	0	0	0.0048233	0	0
Sgk3	0	0	0	0	0	0	0.328459	0.276803	0	0.15901	0	0.187144	0.444839	0.603828	0
Mcmdc2	0.199614	0	0	0	0	0	0	0	0	0.107677	0	0.204537	0.40563	0.372205	0
Snhg6	0	0.155817	0	0	0.420769	0	0	0	0	0.0860191	0.404713	0.146235	0.0848138	0	0
Tcf24	0.436898	0	0	0.617261	0.0499362	0.0404588	0	0	0.134126	0	0	0	0	0	0
Ppp1r42	0	0	0.068516	0.957931	0	0	0	0	0	0	0	0	0	0	0
Cops5	0	0.07284	0	0	0.30842	0.275725	0	0	0	0.0300684	0	0.152022	0.0754059	0.10457	0
Cspp1	0.0692821	0.0770317	0	0.103862	0.111319	0.28451	0	0	0	0	0	0	0	0.0306693	0
Arfgef1	0	0.107656	0	0.443284	0.0205957	0	0	0	0.0242021	0.0115232	0	0.088866	0	0	0
Cpa6	0	0	0	0	0.32231	0	0	0	0	0.76788	0.167937	0.342011	0	0.576436	0
Prex2	0	0.899047	0	0	0.0303617	0.0973807	0	0	0	0	0	0	0	0	0
A830018L16Rik	0	0	0	0	0	0	0	0	0	0.0685637	0.719836	0.553943	0	0	0
Sulf1	0	0	0	0	0.533772	0.819658	0	0	0	0	0	0	0	0.146123	0
Slco5a1	0.250377	0	0	0	0.299462	0	0	0	0	0.337433	0	0.292028	0	0	0.11726
Ncoa2	0.368493	0	0	0	0.0466383	0.338887	0	0	0.0624113	0	0	0	0.0305158	0	0.348542
Tram1	0.196911	0	0	0	0.0558612	0	0	0	0	0.322217	0.321753	0.444388	0	0.262246	0
Lactb2	0	0.0826775	0	0	0.202426	0.237895	0	0	0.0292377	0	0	0.0519532	0.0297517	0	0
Eya1	0	0	0.0626851	0	0.34907	0.65527	0	0	0	0.0581677	0.157748	0	0	0	0
Msc	0	0	0	0	0	0.411912	0	0	0	0	0	0	0	0	0.909926
Trpa1	0	0	0.129764	0	0.0123191	0	0	0	0	0.0450853	0.126082	0.48028	0	0	0.552183
Terf1	0.166707	0.217722	0	0.10507	0.26512	0	0	0	0	0	0	0	0	0	0.281359
Sbspon	0.600757	0.560153	0	0.0460867	0.222702	0	0	0	0	0	0	0	0	0	0.00353291
4930444P10Rik	0.401427	0	0.512305	0	0.0997234	0	0	0	0	0	0	0.452326	0	0.0262685	0
Rpl7	0.198497	0	0.203323	0	0.243526	0.111304	0.137597	0.147059	0	0.207508	0.23373	0.228004	0	0.134765	0.211389
Rdh10	0	0	0	0	0.0800638	0.219279	0	0	0	0.47149	0.0417177	0.00879534	0	0.425974	0
Stau2	0	0	0	0	0.128265	0	0	0	0	0.182499	0.247778	0.0391544	0.109933	0.435579	0
Ube2w	0	0	0	0	0.355276	0.380034	0	0	0	0	0.0882459	0.180282	0	0.0901593	0
Eloc	0	0.170573	0	0	0.258368	0.12122	0	0	0	0.152413	0.0709689	0.238248	0	0.168515	0
D030040B21Rik	0	0	0	0	0.3424	0.0571288	0	0	0	0	0.549298	0.705185	0	0.218224	0
Tmem70	0	0	0	0	0.456445	0.206632	0	0	0	0	0	0.21649	0.160602	0.0262609	0
Ly96	0.338051	0	0	0	0.0890638	0.119015	0.289172	0.177239	0.077039	0	0	0	0.330074	0	0
Jph1	0	0	0	0	0	0	0	0	0	0.832117	0.669891	0.613967	0	0.426354	0
Gdap1	0	0	0	0	0.667804	0.611249	0	0	0	0	0	0	0	0	0
Pi15	0	0	0	0	0.361829	0.912001	0	0	0	0.0733062	0	0	0	0	0
Gm28154	0	0	0	0	0.147364	0.736113	0	0	0	0.0409605	0	0	0	0	0
Crispld1	0	0	0	0	0	0	0	0	0	0.798095	0	0.358393	0	0.944431	0
Il17f	0	0.363837	0	0	0	0	0	0	0	0	0	0	0	0	0.835117
Mcm3	0	0.16308	0	0.501433	0.300905	0	0.178417	0.213753	0.165903	0	0	0	0.229255	0	0.418726
Paqr8	0	0.499865	0	0	0.370576	0.449198	0	0	0	0	0	0	0	0	0.0930991
Efhc1	0	0	0	0	0.469208	0.322621	0	0	0	0	0.0786448	0.0901902	0	0.105328	0
Tram2	0.273039	0	0	0	0.0429787	0	0	0	0	0.269694	0.516723	0.3322	0	0.291852	0
Tmem14a	0	0	0	0	0.430393	0.592125	0	0	0	0	0	0.146667	0	0.0608304	0
Gsta3	0	0	0	0	0	0.294186	0.289488	0.664833	0.427017	0	0	0	0	0	0
Kcnq5	0.496342	0.247853	0	0.0238995	0	0	0	0	0	0	0.205718	0	0.208109	0.00850951	0.696692
Rims1	0	0.543593	0	0.405335	0	0.0545252	0	0	0	0	0.104754	0.229783	0	0	0
Gm29107	0	0.184401	0	0	0.18785	0.35353	0	0	0	0.12991	0.0205861	0	0	0.187907	0
Ogfrl1	0	0	0	0.743061	0.017617	0	0.370761	0.679295	0	0	0	0	0	0	0
B3gat2	0	0.229286	0.0994571	0.00830841	0	0.067165	0	0	0	0.222253	0	0.0769744	0	0.109249	0
Smap1	0	0.167964	0	0	0.114981	0.198548	0	0	0	0.330216	0.152582	0.300005	0	0.28125	0
Sdhaf4	0	0	0	0	0.119522	0.186966	0	0	0	0.290501	0	0.44741	0	0.397568	0
Fam135a	0	0	0	0	0.164008	0	0	0	0	0.36173	0.353745	0.319671	0	0.0218999	0
Col9a1	0	0.26439	0	0	0	0	0	0	0	0.33353	0	0.130704	0	0.683815	0
Lmbrd1	0.100417	0.10154	0	0	0	0	0.101615	0.0492327	0.162156	0	0	0	0.0304202	0	0
Phf3	0.169032	0.187725	0	0.0802438	0.0329787	0.0465212	0.0746124	0	0.103901	0.190675	0	0	0.122923	0.0927664	0.116435
Ptp4a1	0	0	0	0.0125251	0.0616162	0	0.156202	0.0350771	0	0.325262	0.0336328	0.141285	0	0.183542	0
Prim2	0	0.011805	0	0.161399	0.353976	0.00855969	0	0	0	0	0	0	0.0599672	0	0.00956906
Rab23	0	0	0.0583662	0	0.585956	0.769988	0	0	0	0	0	0	0	0	0
Bag2	0	0	0.028998	0	0.699879	0.0830383	0	0	0	0.0300813	0.709039	0.441708	0	0	0
Zfp451	0	0	0	0	0.0482553	0	0.0419251	0	0	0.344211	0	0.00794614	0.0442216	0.00502465	0
Bend6	0	0	0	0	0.39775	0	0	0	0	0.189095	0.304503	0.358035	0	0	0
Dst	0	0.452967	0	0	0.248318	0.328145	0	0	0	0.388055	0	0.353138	0	0.314851	0
Gm37233	0.0437722	0	0	0	0.00512766	0.248738	0	0	0	0	0	0.0782482	0	0.283151	0
Ccdc115	0	0	0	0	0.062234	0	0	0	0.172027	0	0.269448	0	0.256114	0.0061149	0
Imp4	0	0.092515	0	0	0.209252	0	0	0	0.213807	0	0	0	0.24996	0	0
Ptpn18	0.406289	0	0	0.496021	0	0	0.581365	0.807473	0.169447	0	0	0	0.476937	0	0.552974
Arhgef4	0	0	0	0.632189	0.0567447	0	0	0	0	0	0.255362	0	0	0	0.171477
Gm38336	0	0	0	0	0.0338936	0.197004	0	0	0	0.0701462	0	0	0	0.130747	0
Fam168b	0	0	0	0	0.0865449	0.166532	0	0.0127191	0	0	0.0121418	0	0.15425	0	0
Plekhb2	0	0	0	0	0	0	0.441083	0.534629	0.809792	0	0	0	0.370759	0	0
Hs6st1	0.00959933	0	0	0	0	0	0.284267	0.646075	0.316508	0	0	0	0.299606	0	0
Gm33280	0	0	0	0.11909	0	0	0	0	0	0	0.076087	0.0279025	0	0.0604123	0.596541
Uggt1	0	0	0	0	0	0	0	0	0	0.446392	0.440062	0.522503	0	0.21545	0
Neurl3	0	0	0	0.68002	0	0	0.236889	0.674483	0.558177	0	0	0	0	0	0.623037
Arid5a	0.114858	0	0	0	0	0	0	0	0	0.57215	0.338507	0.019744	0	0.506854	0.219734
4930403P22Rik	0	0	0	0	0	0	0	0	0	0.7533	0.452412	0.358171	0	0.563119	0
Kansl3	0	0	0	0	0.032234	0.263136	0	0	0.22207	0	0	0	0.0317096	0.0122772	0
Fer1l5	0	0	0.0244324	0	0	0	0	0	0	0.280561	0.534523	0.110124	0.410315	0.489145	0
Lman2l	0	0	0	0	0	0.346638	0	0	0	0	0.074556	0.0962332	0	0.0677265	0
Cnnm4	0	0	0	0	0	0	0	0	0	0.586699	0.477655	0.40193	0	0.675629	0
Cnnm3	0	0.338356	0	0	0	0	0	0	0	0.116002	0.110992	0	0	0.257536	0
Ankrd39	0	0.329642	0	0	0.124404	0.0906039	0	0	0	0	0.0956828	0.198203	0	0.0161642	0
Sema4c	0	0.561875	0	0	0	0	0	0	0	0.676099	0.326549	0.424872	0	0	0
Fam178b	0	0.887562	0	0	0	0	0	0	0	0.0540617	0.0293172	0	0	0.151691	0.141859
Cox5b	0.0381469	0.193584	0	0	0.238071	0.188977	0	0	0	0.137378	0.133256	0.202034	0.224546	0.106039	0
Actr1b	0	0.171814	0	0	0.0894278	0	0	0	0	0.354965	0.329333	0.412533	0	0.257235	0
4933424G06Rik	0.0629433	0	0	0	0	0	0	0	0	0.622012	0.228484	0.185017	0	0.256002	0
Zap70	0	0	0	0	0	0	0	0	0	0	0	0	0	0	0.865293
Tmem131	0	0	0	0	0.140356	0.235615	0	0	0	0.0196705	0	0.105238	0.0464661	0.0149317	0
Vwa3b	0	0	0	0	0.685625	0.429763	0	0	0	0	0	0	0	0	0.268621
Inpp4a	0	0	0	0.226738	0	0	0	0	0	0.134984	0.386676	0.428159	0	0.604398	0
Coa5	0	0	0	0	0.105119	0	0.188444	0	0	0	0.00577924	0	0.142693	0	0
Unc50	0.125543	0	0	0	0.0139574	0	0	0	0	0.307393	0	0.361288	0.00362942	0.297609	0
Mgat4a	0.534835	0.291461	0	0.236221	0	0	0.480959	0.514895	0.231713	0	0	0	0.535767	0	0.220469
2010300C02Rik	0	0	0	0	0	0	0	0	0	0.56745	0	0.362725	0.8291	0.307808	0
Tsga10	0	0.0621471	0	0	0.0760851	0.222561	0	0	0	0	0.0701929	0	0	0	0
Lipt1	0	0.138879	0	0	0.42032	0.000688299	0	0	0	0	0.084776	0.152719	0	0	0
Mitd1	0	0.325937	0	0	0.308781	0.360664	0	0	0	0	0	0	0	0	0
Mrpl30	0	0	0	0	0.293552	0.0597835	0	0	0	0.153443	0.261215	0.249594	0.158691	0.16643	0
Txndc9	0	0.182891	0	0	0.318764	0.18574	0	0	0	0	0.038611	0.146517	0	0	0
Eif5b	0.159599	0.205389	0	0	0.23794	0.183136	0	0	0.204889	0.0312387	0	0.221212	0.095511	0	0
Rev1	0	0	0	0.0408807	0.188013	0.0240813	0	0	0	0	0	0	0	0	0
Aff3	0	0.640621	0	0	0.227383	0	0	0	0	0	0	0	0	0	0.506335
Lonrf2	0	0.744252	0	0	0.465997	0.488623	0	0	0	0	0	0	0	0	0
Chst10	0	0	0	0	0	0	0.118606	0.403895	0	0	0	0	0	0	0.373774
Pdcl3	0	0.198589	0	0	0.358674	0.178079	0	0	0	0	0.17606	0.158861	0	0.168408	0
Npas2	0	0	0.0115992	0	0.163306	0.0536873	0	0	0	0.55587	0.700681	0.195595	0	0.134503	0
Rpl31	0.0649416	0	0.0943978	0	0.23494	0.117295	0.0383075	0	0	0.191664	0.211389	0.216978	0	0.0792567	0
Tbc1d8	0	0	0	0.887651	0	0	0.23392	0.00958606	0	0	0	0	0.120189	0	0
Cnot11	0.0555092	0.0814799	0	0	0.15732	0.02605	0	0	0	0	0	0.0435218	0	0	0.0499866
Rnf149	0	0	0	0.261289	0	0	0.447432	0.60743	0.625908	0	0	0	0.229083	0	0
Creg2	0.529139	0	0	0	0	0	0.210356	0.275066	0.900588	0	0	0	0.622874	0	0
D930019O06Rik	0.539708	0	0	0	0	0	0.301862	0.557718	0.584567	0	0	0	0	0	0
Rfx8	0	0.237016	0	0	0	0.208571	0	0.0732671	0	0	0	0	0.818942	0	0
1700066B17Rik	0	0	0.388365	0	0.2327	0.566445	0	0	0	0.182227	0	0	0	0	0.0632234
Map4k4	0	0.165141	0	0	0.152103	0.320566	0	0	0	0.195455	0.254496	0.030153	0.219293	0.100351	0
Il1r2	0	0	0	0.913366	0	0	0.677965	0	0	0	0	0	0	0	0.529864
Gm16894	0	0	0	0.0396311	0	0.115499	0	0	0	0.09671	0	0.00809778	0	0.354456	0.383246
Il1r1	0	0	0	0	0.21755	0.758095	0.168737	0	0	0	0	0	0	0	0
Il1rl2	0	0	0	0	0.0902553	0.239105	0.457822	0	0	0	0	0.380322	0	0	0
Il1rl1	0	0	0	0	0.32934	0	0	0	0	0	0	0	0	0	0.861562
Il18r1	0	0	0	0.622138	0	0	0	0	0	0	0	0	0	0	0.863815
Il18rap	0	0	0	0.938047	0	0	0.26506	0	0	0	0	0	0	0	0.76505
Slc9a4	0	0	0	0	0	0	0.966489	0.209858	0.815203	0	0	0	0	0	0
Slc9a2	0	0.476191	0	0	0	0	0	0	0	0.0599106	0	0.706738	0	0	0
Mfsd9	0	0	0	0	0.0802128	0.18838	0	0	0.246584	0	0.0364743	0	0.0308998	0	0
Tmem182	0	0	0.0603406	0	0	0.494155	0	0	0	0.844781	0	0.674045	0	0	0
Pou3f3	0	0	0	0	0	0	0	0	0	0.560101	0	0.238645	0	0.780758	0
Mrps9	0	0.111121	0	0	0.308823	0.0882745	0	0	0	0	0	0	0.367999	0	0
Gpr45	0	0	0	0	0.699192	0	0	0	0	0	0.444446	0.106718	0	0	0.0978009
Tgfbrap1	0	0	0	0	0	0.192386	0.022739	0.299305	0.465846	0	0	0	0.0065425	0	0
8430432A02Rik	0	0.521328	0	0	0	0.00850262	0	0	0	0	0.0774265	0.159833	0.288616	0.128277	0.148946
AI597479	0	0	0	0	0.171307	0.0924321	0	0	0.0197529	0	0.0187538	0.0537426	0	0	0
Fhl2	0	0	0.179541	0	0.801387	0.716127	0	0	0	0	0	0	0	0	0
Nck2	0.050154	0.333163	0	0	0.221383	0.380389	0	0	0	0	0	0	0	0	0.404588
1500015O10Rik	0	0	0	0	0.444276	0.852532	0	0	0	0.0109756	0	0.0866231	0	0	0
Uxs1	0	0.0985885	0	0	0.295994	0.017633	0	0	0	0.261657	0	0.390999	0	0.0020383	0
Tpp2	0	0.0250642	0	0	0.161269	0.126011	0	0	0	0.214227	0	0.021086	0.0106017	0	0
Mettl21c	0	0	0	0.130423	0.0372979	0	0	0	0	0.195899	0.102763	0	0	0.135362	0.171952
Gm8251	0.544774	0	0	0	0.131532	0	0	0	0	0.109789	0.135602	0.16053	0.0318604	0	0
Tex30	0.563805	0.0856715	0	0	0.148617	0	0	0	0	0	0.0535058	0	0.0198185	0	0.0398822
Kdelc1	0	0	0	0	0.515246	0.348924	0	0	0	0.157673	0	0.466509	0	0	0
Bivm	0	0	0	0	0.263953	0.263009	0	0	0	0	0.194878	0	0	0	0
Ercc5	0	0	0	0	0.48937	0.357496	0	0	0	0	0	0.0214728	0	0	0
Gulp1	0	0.513059	0	0	0.557894	0.892287	0	0	0	0	0	0	0	0	0
Col3a1	0	0	0.331378	0	0.730363	0.465731	0	0	0	0	0.183235	0.0919045	0	0	0
Col5a2	0	0	0.294656	0	0.245193	0	0	0	0	0.45082	0.496728	0.488945	0	0.417944	0
Wdr75	0	0	0	0	0.453594	0.310316	0	0	0.0081796	0	0	0.220644	0.117908	0	0
Slc40a1	0	0	0	0.812165	0	0.551326	0.0144057	0.588237	0.154466	0	0	0	0	0	0
Dnah7b	0	0.334197	0.0628085	0	0.604731	0.622718	0	0	0	0	0	0	0	0	0
Slc39a10	0	0.154021	0	0	0.181562	0	0	0	0	0.21556	0.0140845	0.36497	0.0858166	0.0636614	0
4933411E06Rik	0	0.251615	0	0.009004	0	0.0559233	0.00589623	0	0	0	0	0	0	0	0.562711
Tmeff2	0	0.348873	0.0789733	0	0.636706	0.274143	0	0	0	0	0	0	0	0	0.106554
Cavin2	0	0.632516	0.0135735	0	0.229912	0.901817	0	0	0	0	0	0	0	0	0
Nabp1	0	0	0	0	0	0.298971	0.568561	0	0	0	0	0	0	0	0.530919
Gm28055	0	0	0	0	0	0	0	0	0	0.158822	0.69992	0.641477	0	0.185141	0
Myo1b	0	0	0	0	0	0	0	0	0	0.564402	0.637773	0.623198	0.200669	0.617106	0
Stat4	0.360922	0	0	0.374721	0	0	0	0	0	0	0	0	0	0	0.874252
Gm31812	0	0	0	0	0.0885651	0.38584	0	0	0	0	0	0.0373044	0.250811	0.150727	0
Stat1	0	0	0	0	0.166853	0.400717	0.581286	0	0	0	0	0	0	0	0.404001
Gls	0	0.160436	0	0	0.147829	0	0.0812661	0	0.0157801	0.0952467	0	0.102626	0	0	0.0180005
Nab1	0	0	0	0.380305	0.0294894	0	0.157481	0	0	0.231298	0	0	0	0.186543	0.135037
Nemp2	0	0	0	0.257987	0.170681	0.0662235	0	0	0	0	0	0	0	0	0.508254
Mfsd6	0.106701	0.31397	0	0.2914	0	0	0.282688	0.70435	0.658031	0	0	0	0	0	0.501492
Inpp1	0.204196	0	0	0.758637	0.0397447	0.00524994	0	0	0	0	0	0.15037	0	0.297371	0.173323
Hibch	0	0	0	0	0.119979	0.531501	0	0	0	0.00459129	0	0.235075	0	0	0
1700019D03Rik	0	0	0	0	0	0	0	0	0	0.330471	0.159599	0.283266	0	0.775592	0.403256
Pms1	0	0.0206159	0	0	0.150745	0.0377482	0	0	0	0	0.0724893	0.11995	0	0	0.107326
Ormdl1	0	0	0	0	0.00493617	0.0486761	0	0	0.00904255	0.0229572	0.0163043	0	0.090151	0.242809	0
Osgepl1	0	0	0	0	0.0200213	0.0779773	0	0	0	0.410514	0.527128	0.424581	0	0.328109	0
Asnsd1	0	0	0	0.412684	0.22063	0	0.0731266	0	0	0	0.239994	0	0	0	0.0726713
Dnah7a	0	0	0	0	0	0.270134	0	0	0	0	0	0.62845	0	0	0.474367
Stk17b	0	0	0	0	0	0.105691	0	0	0	0.363424	0	0.280088	0.187918	0	0.268591
Hecw2	0	0.0164671	0	0	0	0	0	0	0	0.590422	0.605821	0.505063	0	0.773258	0
Ccdc150	0	0.296453	0	0	0	0	0	0	0	0.317045	0	0.326415	0	0	0
Gtf3c3	0	0	0	0	0.15458	0.105529	0	0	0	0	0.0257195	0.0275385	0	0.0428991	0
Pgap1	0	0	0	0	0.145574	0.0659952	0.61961	0.130406	0	0	0	0	0	0	0
Ankrd44	0	0	0	0.345159	0.036	0.404282	0.0287468	0.136879	0	0	0	0	0	0	0.443876
Sf3b1	0.00918197	0.110265	0	0	0.194308	0.13506	0	0	0	0.170508	0.21112	0.12725	0	0.171359	0
Coq10b	0	0.173952	0	0	0.0588953	0.0562304	0	0	0	0.463158	0	0	0	0.357509	0
Hspd1	0	0.191275	0	0	0.374622	0.228729	0	0	0	0	0	0.0139514	0.212034	0	0
Hspe1	0	0.167237	0.0558983	0	0.304927	0.229277	0	0	0	0.0124685	0.057795	0.149696	0.209742	0	0
Mob4	0.136895	0.22945	0	0	0.234113	0.248669	0	0	0	0	0	0.0263271	0	0.117273	0
Rftn2	0	0.262739	0	0	0	0	0	0	0	0.570794	0.502974	0.737897	0	0.524733	0
Gm10561	0	0	0	0	0.0375154	0	0	0	0	0.52246	0.310632	0.804419	0	0.464685	0
Mars2	0	0.0807495	0	0	0.225571	0	0	0	0	0	0	0.115613	0.166281	0	0
Plcl1	0	0	0	0	0	0.470584	0	0	0	0.448623	0.627143	0	0	0.261935	0
9130227L01Rik	0	0	0	0	0	0	0	0	0	0.520176	0	0.606167	0.898386	0	0
Satb2	0	0	0.114265	0	0	0	0	0	0	0.645923	0.630437	0.772954	0	0.603191	0
BC055402	0	0	0	0	0	0	0	0	0	0.861944	0	0	0	0.978739	0
4930558J18Rik	0.00155142	0	0	0.00166168	0.645986	0	0	0	0	0	0	0	0	0	0.126591
1700066M21Rik	0	0	0	0	0.0811522	0	0	0	0	0.0666511	0.150442	0.800609	0	0.0649681	0
Tyw5	0	0	0	0	0.089234	0	0	0	0	0.160668	0.0464636	0.459926	0	0.226927	0
Maip1	0	0	0	0	0.137214	0.0276814	0	0	0	0.0796155	0	0.338299	0	0.0646094	0
Spats2l	0	0.413907	0	0	0.348542	0	0	0	0	0	0.632183	0	0	0.20814	0
Kctd18	0	0.0353293	0	0	0.10934	0.145686	0.0177003	0	0	0	0	0	0.00573066	0	0.394107
Sgo2a	0	0	0	0.627794	0.55383	0	0	0	0	0	0	0	0.235094	0	0.395201
Aox1	0	0	0.146101	0	0	0.0901672	0	0	0	0.413641	0	0.842654	0	0	0
Aox4	0.330995	0	0	0	0	0	0	0	0	0	0	0	0.347273	0.909899	0
Aox2	0	0	0	0	0	0	0	0	0	0.640082	0.189295	0.517109	0	0.472013	0
Bzw1	0	0.0718135	0	0	0.210133	0.133573	0.0755814	0	0	0.24018	0.0716367	0.132201	0	0.165434	0
Clk1	0.133472	0.0636869	0	0.156131	0	0.082507	0	0	0	0.362989	0.0593735	0	0.00553964	0.271338	0.164719
Ppil3	0	0.0473482	0	0	0.49366	0.48953	0	0	0	0	0	0	0	0	0
Nif3l1	0	0	0	0.0679804	0.27298	0.0110705	0	0	0	0	0	0.164138	0	0	0
Orc2	0	0.139324	0	0	0.129043	0.0073328	0	0	0	0.189056	0	0.0909863	0.138627	0.0792318	0
Gm15834	0	0	0	0	0.0828298	0.0193734	0	0	0.220398	0.0132006	0	0	0	0	0.0895544
Fam126b	0	0.0650128	0	0.283227	0.128128	0.303413	0	0	0	0	0.0652557	0	0.0823305	0	0
Ndufb3	0	0.115441	0	0	0.20754	0.281432	0	0	0	0.123109	0	0.205987	0.221729	0.141354	0
Als2cr12	0	0.237848	0	0	0.061617	0.387147	0	0	0	0	0	0	0.669427	0	0
Cflar	0.10793	0	0	0.223184	0	0	0.480102	0.6768	0.451618	0	0	0	0	0	0
Casp8	0	0.31727	0	0	0.0937021	0.250566	0.310067	0.0940933	0.143561	0	0	0	0.290672	0	0.0619647
Trak2	0	0.127973	0	0.249016	0.0975745	0.108243	0.0200904	0	0	0	0	0	0.373803	0	0
Stradb	0.0978022	0.0248503	0	0.0701795	0.0587021	0.101118	0.0666058	0	0.0609701	0	0	0	0.02149	0	0
Tmem237	0	0.420822	0	0	0.524055	0	0	0	0	0	0.0435931	0	0	0	0
G730003C15Rik	0	0	0	0.225237	0.0117021	0.028675	0	0	0	0.0453696	0	0	0.0429075	0.237543	0.134601
Mpp4	0	0.268397	0	0.0521768	0.28339	0.166588	0.0988198	0	0	0	0	0	0	0	0
Als2	0	0	0	0.102174	0	0	0.268834	0.0655472	0.0740119	0	0	0	0	0	0.119383
Cdk15	0	0	0	0	0.176194	0.0082173	0	0	0	0.0958522	0	0	0	0.739967	0
Fzd7	0	0	0	0	0.0841489	0.43494	0.157685	0	0.0745736	0	0.432137	0	0	0	0
Gm973	0	0	0	0	0	0.0249087	0	0	0	0	0	0.144304	0.293582	0	0.703552
Sumo1	0.0540902	0.125791	0	0.0817468	0.217063	0.242842	0	0	0	0.245678	0.0458961	0.154632	0.0091213	0.25168	0.0740096
Nop58	0	0.12515	0	0	0.422289	0.241097	0	0	0	0.226868	0	0.218556	0	0	0
Bmpr2	0	0.124337	0	0	0.258128	0.396937	0	0	0	0.341324	0.11123	0.227603	0	0.284344	0
Fam117b	0	0	0	0	0.249636	0	0	0	0	0	0.550421	0	0	0	0
Ica1l	0	0	0	0	0.184553	0.100434	0	0	0	0	0	0	0	0	0.558021
Wdr12	0	0.0773738	0	0	0.600119	0.129044	0	0	0	0	0	0.0263254	0.0708691	0	0
Carf	0	0	0	0	0.17435	0.197532	0	0	0	0	0.213172	0	0	0	0
Nbeal1	0	0.0327203	0	0	0.299273	0.430489	0	0	0	0.320615	0.0897848	0.150385	0	0.29347	0
Cyp20a1	0	0.0097947	0	0	0.458704	0	0	0	0	0.309506	0.201078	0.570993	0	0.0294369	0
Abi2	0	0	0	0	0.32571	0.0434949	0	0	0	0.237115	0.290941	0.468277	0	0	0
Raph1	0	0	0	0	0.0378001	0	0	0.0453151	0	0.139531	0.385629	0.51861	0.0656638	0	0
Cd28	0.56149	0	0	0.150597	0	0	0.142861	0.258118	0	0	0	0	0	0	0.786332
Icos	0	0	0	0	0	0	0	0.000925436	0	0	0	0	0	0	0.908247
Pard3b	0	0	0	0	0.332605	0.276467	0	0	0	0.47034	0	0.484391	0	0	0
Pard3bos3	0	0	0	0	0.675343	0.448431	0	0	0	0.232454	0	0.164447	0	0	0
Nrp2	0	0	0.108959	0	0.135813	0	0	0.136345	0	0.430266	0.274621	0.466003	0.171538	0.104333	0
Ino80d	0	0.0536356	0	0.0391504	0	0.0960904	0.0620155	0.0728903	0.0114362	0	0	0	0	0	0.00468415
Ino80dos	0	0	0	0.47368	0	0.248326	0	0	0	0.131154	0	0.028691	0	0	0.10794
Gm20342	0	0	0	0.623888	0	0.104942	0	0	0	0.0313972	0	0.110579	0	0	0.441235
Ndufs1	0	0	0	0	0.13402	0.0408354	0	0	0	0.137022	0	0.219487	0.320795	0.0109973	0
Eef1b2	0.191235	0	0.0971125	0	0.237833	0	0.135078	0	0	0.21597	0.231969	0.220128	0	0.144482	0.199612
Zdbf2	0	0.332648	0	0	0	0	0	0	0	0.16905	0.00103337	0.024172	0	0.126057	0.752703
Adam23	0	0	0	0	0.0201866	0.131898	0	0	0	0.77332	0.367664	0.683035	0	0	0
Mdh1b	0	0	0	0	0.112278	0	0	0	0	0.645644	0.187462	0.540244	0	0	0
Fastkd2	0	0	0	0	0.27928	0.0131534	0	0	0	0	0	0	0.188535	0	0
Klf7	0	0.23653	0	0.00506813	0.340781	0.0703873	0	0	0	0.235626	0	0	0	0	0
Gm26649	0	0.0845348	0	0.498978	0.123979	0	0	0	0	0.233097	0	0	0	0	0
Creb1	0	0.132506	0	0	0.107574	0.16305	0	0	0	0	0.0194427	0	0.021872	0	0.178951
Mettl21a	0	0	0	0	0.341265	0.0155851	0	0	0	0.28572	0.524136	0.52133	0	0.309011	0
Ccnyl1	0	0.132998	0	0	0.46369	0.243882	0	0	0	0	0	0.0968397	0	0	0
Fzd5	0	0	0.160908	0	0.593761	0.322059	0	0	0	0.376952	0.439222	0.541558	0	0	0
Plekhm3	0	0.0779299	0	0	0	0	0.467553	0.685742	0.573278	0	0	0	0.279281	0	0
Crygc	0	0	0.115128	0	0.0404224	0	0	0	0	0.433276	0.539009	0.724607	0	0.100029	0
Idh1	0	0	0	0	0	0.528463	0.13934	0.108775	0.00130526	0	0	0.426488	0	0	0
Pikfyve	0.0712855	0	0	0	0.00185106	0.0142947	0.0663437	0.0813354	0.00310284	0	0	0.0531057	0.0889685	0	0
Map2	0	0.9667	0.137366	0	0.4044	0	0	0	0	0	0	0	0	0	0
Rpe	0	0	0	0.207483	0.165632	0.421257	0	0	0	0	0	0	0.125263	0	0
Kansl1l	0	0.032207	0	0.171359	0.088	0.246888	0	0	0	0.158902	0.0612753	0	0	0.222234	0
Acadl	0.154341	0.170145	0	0	0.375742	0.377875	0.108204	0	0	0	0	0	0.227755	0	0
Myl1	0	0	0	0	0	0.680644	0	0	0	0.526581	0	0	0	0.114257	0.00730613
Lancl1	0	0	0	0	0.407864	0.428358	0	0	0	0	0	0.0171661	0	0	0
Ikzf2	0	0	0	0	0.0372766	0.284288	0	0	0	0	0.0505588	0	0	0	0.702264
Bard1	0	0	0	0.675269	0.294492	0	0	0	0	0	0	0	0	0	0.366591
Atic	0	0.0843884	0	0	0.564622	0.17431	0	0	0	0	0	0	0.136437	0	0
Fn1	0	0	0.409829	0	0.400865	0.179888	0	0	0	0.356493	0.435792	0.368701	0	0	0
Apol7d	0	0	0	0	0	0.00639135	0	0	0	0.725098	0.53734	0.375991	0	0.0725174	0
Gm8883	0	0	0	0	0.381956	0	0	0	0	0.112094	0	0.42426	0	0.439542	0
Gm28818	0	0	0.458012	0	0.735033	0.425708	0	0	0	0	0	0	0	0	0
4933417E11Rik	0	0	0	0	0.684032	0	0.7097	0	0.0738512	0	0	0	0	0	0
Mreg	0.500982	0	0	0.756255	0	0	0.60669	0	0	0	0	0	0	0	0
D230017M19Rik	0.112493	0	0	0	0.0332128	0.061801	0	0	0	0.173783	0.0987002	0.0550164	0	0.18242	0
Pecr	0.11922	0	0	0	0.203539	0	0	0	0	0.0754816	0.288526	0.61792	0	0.0565984	0
Tmem169	0	0	0.126481	0	0.734029	0.14015	0	0	0	0	0.0663527	0	0	0	0
Xrcc5	0	0.416839	0	0	0.521971	0.412819	0	0	0	0.0356597	0	0.0901371	0	0	0
2023-03-04	0	0	0	0.495531	0	0	0.388097	0.00026441	0	0.322218	0	0	0	0	0
Smarcal1	0	0.0170659	0	0	0.143128	0.273636	0	0	0.0387226	0	0	0	0.0965185	0	0
Rpl37a	0.203923	0	0.356611	0.117318	0.247153	0.169393	0.196512	0.226977	0	0.191439	0.234883	0.231042	0	0.0500095	0.22504
Igfbp2	0	0	0.380914	0	0.791972	0.118535	0	0	0	0	0	0.0488704	0	0	0
Igfbp5	0	0.481702	0.392813	0	0.559619	0.824571	0	0	0	0	0	0	0	0	0
Tns1	0	0.191949	0	0	0.263822	0.169291	0.56746	0.450242	0	0	0	0	0.0573543	0	0
Rufy4	0	0	0	0	0	0	0	0	0	0.107067	0.376298	0	0.970106	0	0
Cxcr2	0	0	0	0.917657	0	0	0	0	0	0	0	0	0	0	0.155438
Arpc2	0	0	0	0.266958	0.190817	0	0.211047	0.223363	0.211791	0	0.113222	0	0.211796	0.0205726	0.121855
Gpbar1	0	0.0432596	0	0	0	0	0	0	0	0.860159	0	0.576444	0	0.234407	0
Aamp	0	0.0699316	0	0	0.132061	0.183751	0	0	0.0471631	0.278355	0.0707868	0.220693	0	0.168705	0
Pnkd	0	0.0823353	0	0	0.244221	0.319706	0	0	0	0.182199	0.0992712	0.248761	0.216033	0.166864	0
Tmbim1	0	0.010479	0	0	0.0299768	0	0.0916667	0	0	0.50841	0.17128	0.111399	0	0.527037	0
Catip	0	0	0	0	0.380822	0.124709	0	0	0	0	0	0.593084	0	0	0
Slc11a1	0	0	0	0	0	0	0.635319	0.945328	0.840304	0	0	0	0.234559	0	0
Ctdsp1	0	0	0	0	0.130221	0.299712	0	0	0	0	0	0	0	0	0
Vil1	0	0	0.2208	0.467274	0	0.141664	0	0	0	0.122904	0.0178353	0.0170144	0	0	0
Usp37	0	0	0	0	0.144851	0	0	0	0	0	0.0526638	0.00743055	0.050382	0	0.00997056
Cnot9	0	0.125841	0	0	0.157447	0	0.0302972	0	0.155094	0	0	0.00785515	0.0685291	0	0
Zfp142	0	0	0	0	0.103596	0.0671365	0	0.0557488	0.368163	0	0	0	0	0	0
Bcs1l	0	0	0	0	0.419156	0.346336	0	0	0	0	0	0.0494262	0	0	0
Rnf25	0	0	0	0	0.110021	0	0	0	0.0803167	0	0.00287048	0.173503	0	0	0
Stk36	0	0	0	0	0.329855	0.208541	0	0	0	0.00833333	0.523541	0.0915146	0	0.0453688	0
Ttll4	0	0	0	0	0.117979	0	0	0	0	0.0773761	0.0663273	0.123468	0	0	0
Cyp27a1	0	0	0	0	0	0	0.538579	0.671523	0.446377	0	0	0	0.400151	0	0
Prkag3	0	0.0220322	0.172631	0	0.595961	0.0430678	0	0	0	0.0585366	0	0.258134	0	0	0
Wnt6	0.107384	0	0	0	0.0388298	0	0.260788	0.320189	0.603952	0	0	0	0.42821	0	0
Wnt10a	0.946335	0	0	0	0.156995	0	0	0	0	0	0	0	0	0	0
Cfap65	0	0	0	0	0	0	0	0	0	0.272927	0.644159	0.718425	0	0.0392712	0
Ihh	0	0	0	0	0	0	0	0	0	0.364109	0.655947	0.10712	0	0.950545	0
Nhej1	0	0	0	0.0228481	0.101234	0	0	0	0	0	0.205497	0.197155	0	0.326707	0
Slc23a3	0	0	0	0	0.0420638	0	0	0	0	0	0.282084	0.339799	0	0.158107	0
Cnppd1	0	0	0	0	0	0	0.00872093	0	0.579703	0.126358	0.366398	0.0803898	0	0.224457	0
Retreg2	0	0	0	0	0	0	0.0970284	0.0423095	0.648411	0	0.200925	0	0.276842	0.0646568	0
Zfand2b	0.0570952	0	0	0	0.0592128	0	0	0	0	0	0.253161	0.0380626	0.038873	0.0293421	0
Abcb6	0.0576229	0	0	0	0	0	0	0	0	0.180573	0.477131	0.422431	0	0	0
Atg9a	0	0	0	0	0.0255745	0	0	0	0	0.159734	0.369014	0.298677	0	0.2454	0
Ankzf1	0	0	0	0	0.063383	0	0	0	0	0	0.374504	0.29306	0	0	0
Glb1l	0	0	0	0	0.0665192	0.202832	0	0	0	0.304382	0.16532	0.185006	0	0.348273	0
Stk16	0	0	0	0.027667	0.192738	0.220926	0	0	0	0.319192	0	0.408453	0	0.249344	0
Tuba4a	0.460448	0	0	0.58623	0	0	0.227526	0.00494214	0.315661	0	0.0353644	0	0.426281	0.327685	0.200449
Dnajb2	0	0.0651411	0	0	0.0857234	0.102376	0	0	0	0.00275668	0.0799908	0	0	0.378601	0
Ptprn	0	0.636975	0	0	0.470757	0	0	0	0	0	0	0	0.339217	0	0
Dnpep	0.0709516	0	0	0	0.258168	0.208361	0	0	0	0	0.139884	0.399161	0	0	0
Des	0	0	0	0	0.269244	0.170938	0	0	0	0.709364	0.336687	0.430044	0	0.0349158	0
Gm15179	0	0	0.280968	0	0	0.76617	0	0	0	0	0	0	0	0	0
Speg	0	0	0	0	0.265712	0.60356	0	0	0	0.245334	0.0765656	0.0452438	0	0	0
Gmppa	0.0057596	0	0	0	0.106169	0	0	0	0	0.182937	0.423827	0.515531	0	0.222529	0
Chpf	0.0437723	0	0	0	0.515579	0.192959	0	0	0	0.141188	0	0.618077	0	0	0
Obsl1	0	0	0.00777394	0	0.0331532	0.592543	0	0	0	0.521373	0.502029	0.435957	0	0.390392	0
Tmem198	0.0660461	0	0	0	0	0.0702751	0	0	0	0.350069	0.0102189	0.351704	0	0.257622	0
Inha	0	0	0.171027	0	0	0.059292	0	0	0	0.256203	0.680279	0.409416	0	0.171351	0
Stk11ip	0	0	0	0	0	0	0.170925	0.220861	0.543178	0	0	0	0.144568	0	0.00856531
Slc4a3	0	0	0	0	0	0.244038	0	0	0	0.84224	0.353235	0.0472998	0	0.434992	0
Epha4	0	0.452115	0	0	0.335629	0	0.572016	0.0390753	0	0	0	0	0.312313	0	0
Pax3	0	0.083501	0.15116	0	0.595102	0.137722	0	0	0	0	0	0	0	0	0
Farsb	0	0	0	0	0.412696	0	0	0	0.00826662	0	0	0.223538	0.181952	0	0
Mogat1	0.228433	0	0	0	0	0	0	0	0	0.544327	0.145623	0.293437	0	0.312666	0
Acsl3	0	0	0	0	0.029617	0	0	0	0	0.652529	0.00344458	0.346646	0	0.543347	0
Utp14b	0	0	0	0	0	0	0	0	0	0.666702	0.00681261	0	0	0.60284	0
Kcne4	0	0	0.135859	0	0.855329	0.623965	0	0	0	0.209211	0	0	0	0	0
Scg2	0	0	0	0	0.718424	0.632872	0	0	0	0	0	0	0	0	0
Ap1s3	0.365023	0	0	0.505281	0	0	0.280483	0.0517429	0.233837	0	0	0	0.115564	0	0.53855
Wdfy1	0	0.158939	0	0	0.559244	0.19781	0	0	0	0	0	0	0.170595	0	0
Mrpl44	0	0.0872113	0	0	0.118766	0.0800544	0	0	0.160648	0	0	0	0.306496	0	0
Serpine2	0	0	0.181639	0	0.273853	0.249821	0	0	0	0.523412	0.530801	0.475702	0	0.488988	0
Fam124b	0	0.446763	0	0	0	0	0	0	0	0	0	0	0	0	0.82651
Cul3	0	0.138708	0	0	0.140282	0.0616014	0	0	0.180595	0.12274	0.152945	0	0.0335244	0.00346037	0
Dock10	0	0	0	0	0	0	0.604642	0.812908	0.8432	0	0	0	0.391677	0	0.487844
Nyap2	0	0	0	0	0	0	0	0.302755	0.593901	0	0	0	0.991317	0	0
Irs1	0	0	0.172878	0	0.537998	0.586041	0	0	0	0.0134146	0.351588	0.632341	0	0.0661295	0
Gm9747	0	0	0.254668	0	0.153025	0.388137	0	0	0	0.0563008	0.0749755	0.259031	0	0.0992305	0
Rhbdd1	0	0	0	0	0.00817021	0	0	0	0	0	0.542662	0.186426	0.200926	0.0585232	0
Gm28940	0	0	0	0.784443	0	0	0	0.0147381	0	0	0	0	0	0	0.0696887
Col4a4	0.182383	0	0	0.230339	0.0382553	0	0	0	0	0.0528838	0.15757	0.0315419	0	0	0.136131
Mff	0	0.0469204	0	0	0.155709	0.0601553	0	0	0	0.115959	0.102565	0.0685084	0.144842	0.249219	0
Agfg1	0	0.0745081	0	0	0.170793	0	0.1354	0.204454	0.455051	0	0	0	0.0636103	0	0
A030005L19Rik	0	0	0	0	0.102096	0.0200867	0	0.227865	0.50075	0	0	0	0	0	0
Slc19a3	0	0	0.122584	0	0	0	0	0	0	0	0.16612	0	0	0.82042	0
Ccl20	0	0	0.364198	0	0.501257	0	0	0	0.248281	0.556784	0	0	0	0	0
Daw1	0	0	0.551389	0	0.632811	0.502577	0	0	0	0	0	0	0	0	0
Sphkap	0	0	0	0	0	0.150773	0	0	0	0	0.657012	0.540243	0	0.642645	0
Pid1	0	0	0	0	0	0	0.342449	0.83971	0.0929001	0	0.00375077	0.0686643	0.348937	0	0
Dner	0	0	0	0	0	0	0	0	0	0.523076	0.356887	0	0.546842	0.607377	0
Trip12	0	0.00727117	0	0	0.035938	0	0.0494832	0	0.317696	0.0496939	0.174667	0.0979272	0.0522445	0	0
Fbxo36	0	0	0	0	0.201855	0.00880039	0	0	0	0.138362	0	0.608038	0	0.373003	0
Slc16a14	0	0	0	0.308386	0	0	0.88022	0.477969	0	0	0	0	0	0	0
C130026I21Rik	0.695303	0	0	0.74822	0	0	0.520626	0.117429	0.0556557	0	0	0	0	0	0
A530032D15Rik	0.69547	0	0	0.861771	0	0	0.459441	0.0087146	0	0	0	0	0	0	0
A530040E14Rik	0.874772	0	0	0.111096	0	0	0.522849	0.0624183	0	0	0	0	0	0	0
Sp110	0.0810143	0	0	0.440869	0	0.00179753	0.59899	0.384656	0.112634	0	0	0	0	0	0.523237
Sp140	0.52937	0	0	0.797866	0	0.0814026	0.552282	0.0692409	0.146085	0	0	0	0	0	0.0631022
Sp100	0	0	0	0.418708	0	0	0.573889	0.610516	0.48679	0	0	0	0	0	0.517311
A630001G21Rik	0.574875	0	0	0.385241	0	0	0.205632	0.153982	0.371727	0	0	0	0.0390591	0	0.115973
Cab39	0	0	0	0.012358	0	0	0.108333	0.120813	0.336895	0.0399712	0	0.00371287	0.183811	0.15468	0
Itm2c	0	0	0	0	0.137392	0.0688316	0	0	0	0.268858	0.283427	0.346377	0	0.209683	0
4933407L21Rik	0.347995	0.525175	0	0	0	0	0	0	0	0.103615	0.136367	0	0	0	0.376145
Gpr55	0.908326	0	0	0.148689	0	0	0.0522237	0	0	0	0	0	0.222869	0	0.20357
2810459M11Rik	0	0.698542	0	0	0	0	0	0	0	0.271164	0.0509032	0.0211088	0	0	0.577138
Psmd1	0	0.156672	0	0	0.0379748	0.0608577	0	0.172878	0.760156	0.0408264	0	0.0318969	0.12703	0	0
Htr2b	0	0	0	0	0	0	0	0.804723	0.988246	0	0	0	0	0	0
Armc9	0	0	0	0	0.178503	0.0651776	0	0	0	0.285293	0	0.444983	0	0.0200348	0
B3gnt7	0	0	0	0	0	0	0.650229	0.507162	0	0	0.3725	0	0.319337	0	0
Ncl	0.10409	0.148931	0	0	0.246073	0.160304	0	0.0143443	0.0704787	0	0.0886353	0.0576058	0.147612	0	0.170905
Ptma	0.154925	0.181095	0.188257	0	0.24045	0.168608	0	0.151519	0	0.167447	0.184859	0.165617	0.082617	0.132727	0.1964
Pde6d	0	0.0597947	0	0	0.490394	0.341538	0	0	0	0	0.082013	0.132597	0	0	0
Cops7b	0	0.0293841	0	0	0.158298	0	0	0	0	0	0	0.124773	0	0	0.0469051
Dis3l2	0	0.0307956	0	0	0	0	0	0	0	0	0	0.00218367	0.00859599	0.0249547	0.0472636
Eif4e2	0	0.116296	0	0	0.297616	0.00260288	0	0	0	0.0976773	0	0.267861	0.145415	0	0
Efhd1	0	0.83148	0	0	0.227191	0	0	0	0	0	0	0	0.205843	0	0.00576422
Gigyf2	0.0888982	0.107571	0	0	0.106155	0.0355164	0	0	0	0.0972693	0	0.0778539	0.0202006	0	0
Kcnj13	0.290501	0	0	0.498555	0	0.00228258	0	0	0	0.135906	0	0	0.324477	0	0.138867
3110079O15Rik	0	0.497463	0	0	0	0	0	0	0	0.279434	0	0.139512	0	0.737467	0
Ngef	0	0.154418	0	0	0	0	0	0	0	0.343972	0.00164574	0.209061	0	0.949063	0
Neu2	0	0	0	0	0	0	0	0	0	0.850023	0	0.152831	0	0.622147	0
Inpp5d	0.137414	0	0	0.311473	0	0	0.50725	0.85328	0.58787	0	0	0	0.588179	0	0.454361
Atg16l1	0	0	0	0	0.0574681	0	0.0135013	0	0	0	0	0.000515589	0.0101242	0	0.0914282
Sag	0	0	0	0	0.0617021	0	0	0	0	0.0571487	0.113863	0.1679	0	0	0
Dgkd	0.0953255	0	0	0	0	0	0	0.283211	0.35449	0	0	0	0.316963	0	0
Usp40	0	0	0	0	0.325953	0.421386	0	0	0	0	0	0.0884759	0	0	0
Ugt1a7c	0	0	0	0.198656	0	0	0.811095	0.75996	0.201969	0	0	0	0.183681	0	0
Ugt1a6b	0	0	0	0.0269192	0	0.41565	0.644454	0.578533	0	0	0	0	0	0	0
Ugt1a6a	0	0	0	0	0	0	0.839386	0.71648	0.19746	0	0	0	0	0	0
Ugt1a5	0	0	0	0	0	0	0.777421	0.674718	0.287252	0	0	0	0	0	0
Ugt1a2	0	0	0	0	0	0	0.741752	0.638152	0.0501459	0	0	0	0	0	0
Dnajb3	0	0.0397722	0	0	0.379911	0.209386	0	0	0	0	0	0.479305	0	0.0603223	0
Ugt1a1	0	0	0	0	0	0	0.816149	0.639222	0	0	0	0	0	0	0
Mroh2a	0.105702	0	0	0.586722	0	0	0.182823	0.0618736	0	0	0	0	0	0	0.0278914
Hjurp	0	0	0	0.541468	0.254667	0	0	0	0	0	0.287535	0.0371527	0	0	0.0576151
Glrp1	0	0	0	0	0	0	0	0.372846	0	0.0593014	0.146766	0	0.166248	0	0
Gm29336	0	0	0	0	0	0	0.837448	0.714765	0.171562	0	0	0	0	0	0
Arl4c	0	0	0	0	0	0	0.559917	0.797111	0.405527	0	0	0	0	0	0.254561
Sh3bp4	0	0	0	0	0.650066	0.116953	0	0	0	0.444657	0	0.112233	0	0	0
Agap1	0	0.387722	0	0.0370741	0	0	0	0.0571601	0.430769	0	0.122201	0	0.664975	0.0957432	0
Ackr3	0	0	0.00333169	0	0	0	0	0	0	0.696918	0.694648	0.507774	0	0.817044	0
Gm28723	0	0	0	0	0	0	0	0	0	0.109003	0.88861	0	0	0.838021	0
Cops8	0	0	0	0	0.26809	0	0	0	0	0.42061	0.193838	0.283489	0	0.152588	0
Col6a3	0	0	0.311716	0	0.678845	0.241209	0	0	0	0.340505	0.296472	0.353117	0	0	0
Mlph	0	0.762497	0	0	0.189574	0	0	0	0	0	0.295372	0	0	0	0
Lrrfip1	0	0.152524	0	0.147163	0.195872	0	0	0	0	0.108795	0.238674	0.290125	0	0.150692	0
Rbm44	0	0	0	0	0.0117447	0	0	0	0	0.473973	0.31886	0.478388	0	0.387918	0
Ramp1	0	0	0.127221	0	0.0897701	0	0	0	0	0.585981	0.631505	0.621118	0	0.60169	0
Ube2f	0	0	0	0	0.0905768	0	0	0	0	0.109907	0.239863	0.30815	0.0250716	0.256769	0
Scly	0	0	0	0	0.0169362	0	0.00374677	0	0.697104	0	0	0.100388	0.00195798	0	0
Klhl30	0	0.381604	0	0	0	0	0	0	0	0.645609	0.795189	0.342159	0	0.853667	0
Erfe	0	0.358551	0	0	0.583763	0	0	0	0	0	0.418594	0	0	0	0
Ilkap	0	0.0606929	0	0	0.374761	0.286086	0	0	0	0	0	0.0749129	0	0	0
Hes6	0	0	0	0	0.00338298	0	0	0	0	0	0.619568	0.584997	0	0.204155	0
Per2	0	0.0249358	0	0.58799	0.0235532	0.273158	0	0	0	0	0	0	0.232555	0	0
Traf3ip1	0	0	0	0	0.333071	0.420657	0	0	0	0	0	0	0.0779679	0	0
Asb1	0	0	0	0	0.0347234	0.0321844	0	0	0	0	0.0823637	0.457761	0	0	0
Gm29100	0	0	0	0	0.428089	0.696347	0	0	0	0	0.0837206	0.300267	0	0	0
Twist2	0	0	0.275212	0	0.65284	0.902219	0	0	0	0	0	0	0	0	0
Hdac4	0	0	0	0.200328	0.0402128	0	0	0	0	0.352738	0.0349434	0	0	0	0
Gm26720	0	0	0	0.522164	0	0	0	0	0	0.642313	0.0611987	0	0	0.224208	0
Ndufa10	0	0.0971343	0	0	0.311598	0.267027	0	0	0	0.0283129	0	0.0786349	0.26027	0	0
Cops9	0	0	0	0	0.256977	0.229019	0	0	0	0.0758012	0.116076	0.240226	0.11022	0	0
Otos	0	0	0	0.943744	0	0	0	0	0	0	0	0	0	0	0.213605
Gm29483	0	0	0	0	0	0	0	0	0	0.486424	0.215807	0.716391	0	0.829599	0
Gpc1	0	0.044953	0.153875	0	0.116048	0	0	0	0	0.580567	0.630826	0.644807	0	0.541287	0
Gm29480	0	0.0330248	0	0.293233	0.0401064	0	0	0	0	0.261998	0.189837	0.157016	0	0	0.0157697
Ankmy1	0	0	0.818386	0	0	0	0	0	0	0.448858	0.435179	0.379832	0	0.362112	0
Dusp28	0	0	0	0	0	0	0	0	0	0.255414	0	0.145699	0.00329513	0.340044	0
5033417F24Rik	0	0	0	0	0.0471489	0.139934	0	0	0	0	0	0	0	0.337559	0
Rnpepl1	0	0.101411	0	0	0	0	0.0931525	0.23179	0.409494	0	0	0	0.0446991	0	0
9430060I03Rik	0.189305	0	0	0.0922749	0	0.0440539	0	0	0	0	0.19773	0.0531967	0	0.0892178	0.0338542
Capn10	0	0.00431993	0	0	0.122404	0.00570646	0	0	0	0	0.319312	0.114157	0	0	0
Gpr35	0	0	0	0	0	0	0.340099	0.0999386	0.0840585	0	0.749485	0.109153	0	0.00512685	0
Kif1a	0	0.31736	0	0	0.691209	0	0.301785	0	0	0	0.0165117	0	0	0	0
Gm28086	0	0	0	0.801978	0	0.516977	0	0.173718	0	0	0	0	0	0	0
2310007B03Rik	0	0	0.17041	0	0.0813467	0	0	0	0	0.758863	0.37732	0.476049	0	0.102279	0
Crocc2	0	0	0	0	0.720696	0.577016	0.0916928	0	0	0	0	0	0	0	0
Sned1	0	0	0.218524	0	0.67109	0.727804	0	0	0	0	0	0	0	0	0
Mterf4	0	0	0	0	0.193505	0.150192	0	0	0	0	0	0.0713939	0	0	0
Gm28535	0.138642	0	0.0742843	0	0.117766	0	0	0	0	0.235809	0	0	0	0	0
Pask	0	0	0	0.235056	0.35101	0	0	0	0	0	0	0	0	0	0.0475984
Ppp1r7	0	0	0	0	0.382509	0.0985876	0	0	0	0	0	0.0961274	0.00577841	0	0
Ano7	0	0	0.0575025	0	0	0	0	0	0	0.378584	0.220677	0.728172	0	0	0
Hdlbp	0.160017	0	0.0410908	0	0.225173	0	0	0	0	0.331507	0.355987	0.361625	0	0.300005	0
2023-09-02	0	0.224897	0	0	0.189636	0	0	0	0	0.14249	0	0.153221	0	0	0
Farp2	0	0	0	0	0	0	0	0	0	0.631161	0.513937	0.789116	0	0.508597	0
Stk25	0	0.145937	0	0	0.325698	0.156766	0	0	0	0.0413666	0.419104	0.186201	0	0.245635	0
Gm28536	0	0	0	0	0	0	0	0	0	0.676029	0.153816	0.54603	0	0.572032	0
Bok	0	0	0.177937	0	0.901398	0.390451	0	0	0	0	0.113442	0.0712247	0	0	0
Thap4	0	0	0	0	0.321064	0	0	0	0	0	0.341722	0.0711816	0	0	0
Atg4b	0	0.0811805	0	0	0.195654	0.166884	0	0	0.119659	0	0	0	0	0	0
Dtymk	0	0	0	0	0.521081	0.314763	0	0	0	0	0	0.0946068	0	0	0
Ing5	0	0	0	0	0.185319	0.0792627	0.0262274	0	0	0	0.0554577	0	0	0	0.00642398
D2hgdh	0	0.249459	0	0	0.10183	0.208244	0	0	0	0	0	0	0	0	0
Fam174a	0	0.0670659	0	0	0	0	0.259617	0.413752	0.299762	0	0	0	0.164995	0	0
St8sia4	0.448309	0.387854	0	0	0	0	0.478384	0.366496	0.836184	0	0	0	0.640386	0	0.489961
D1Ertd622e	0	0.0914885	0	0.269036	0	0	0.315554	0.289514	0.0753546	0	0	0	0.25284	0	0
Ppip5k2	0	0.126747	0	0	0.162681	0.245146	0	0	0	0	0	0	0.208982	0	0.00970289
Gin1	0.102513	0	0	0.0308339	0.078234	0.159865	0	0	0	0	0	0.0743358	0.0246896	0.0993452	0
Pam	0	0.23403	0.175592	0	0.454768	0.471178	0	0	0	0.161513	0	0.255594	0	0	0
Gm7967	0	0	0	0.210974	0	0.0209142	0	0	0	0	0	0	0	0	0.69223
Gm28187	0	0	0	0.335397	0	0.0191166	0	0	0	0.249219	0.085196	0	0	0.0928118	0.596852
Rnf152	0	0.461292	0	0	0.119447	0	0	0	0	0	0.723061	0	0	0	0.116691
Pign	0	0	0	0	0.195355	0.336261	0	0	0	0	0	0	0	0	0
2310035C23Rik	0	0.0289136	0	0.00759853	0.0524043	0.0753087	0.0473514	0	0	0	0	0	0.00835721	0	0.193875
Tnfrsf11a	0	0	0	0	0	0	0.55397	0.89964	0.641666	0	0	0	0.863788	0	0
Gm7160	0	0	0	0	0	0.0571787	0.278474	0.23396	0	0	0	0	0.263888	0	0
Zcchc2	0	0	0	0	0.0588511	0.0954691	0.440489	0.210475	0.486987	0	0	0	0.494919	0	0
Phlpp1	0	0	0	0	0.0767234	0	0.40986	0	0.419585	0	0	0	0.560637	0	0
Bcl2	0.58644	0.0420445	0	0	0.0257872	0	0	0	0	0	0.116567	0	0	0.445343	0.573087
Kdsr	0	0.16343	0	0	0.241466	0.198116	0	0	0	0.0661393	0	0	0	0	0.0114427
Vps4b	0	0	0	0.237118	0	0	0.276701	0.115246	0.207796	0	0	0	0.136581	0	0
Serpinb5	0	0	0	0	0	0.18052	0	0.147836	0.390572	0	0	0	0.965253	0	0
Serpinb12	0	0	0	0	0	0	0.385127	0.363446	0.325596	0	0	0	0.96266	0	0
Serpinb2	0	0	0	0.772852	0.233085	0	0.381407	0	0	0	0	0	0	0	0.445987
Serpinb8	0	0	0	0	0	0	0.626522	0.729268	0.840076	0	0	0	0.556246	0	0
Cdh19	0	0.971768	0.304158	0	0	0	0	0	0	0	0	0	0	0	0
Dsel	0	0	0	0	0.460182	0.33692	0	0	0	0	0.00281311	0.240694	0	0	0
Tsn	0	0.135672	0	0	0.265067	0.152459	0	0	0	0.127026	0.0433463	0.243846	0	0.166335	0
Nifk	0	0.0860992	0	0	0.305458	0	0	0	0.0899872	0	0	0.225885	0.128128	0	0
Clasp1	0.0506678	0.241206	0	0.0189246	0.235654	0.237395	0	0	0	0	0	0	0	0	0
2900060B14Rik	0.507823	0.0282532	0	0.0518316	0	0	0	0	0	0.576629	0	0.122013	0	0.217281	0
Tfcp2l1	0.503201	0	0	0	0.137727	0	0	0	0	0	0.14207	0.159909	0	0	0
Gli2	0	0	0.0113524	0	0.491054	0.59483	0	0	0	0.275126	0	0.143613	0	0.252598	0
Inhbb	0	0.526007	0.138327	0	0.856427	0	0	0	0	0	0	0.0624101	0	0	0
Ralb	0	0.159281	0	0	0.0364681	0	0.163257	0.147309	0.0926242	0	0	0	0.282044	0.00459803	0
Tmem185b	0	0	0	0	0.0217447	0	0	0.0420417	0.0997882	0	0	0.134872	0.0473734	0.0312515	0
Epb41l5	0	0	0	0	0	0.499854	0	0	0	0.534085	0.385428	0.501783	0	0.0723305	0
Ptpn4	0	0	0	0	0	0	0	0	0	0.642102	0.577412	0.666059	0	0.595612	0
Tmem177	0	0.268844	0	0	0.130532	0	0	0	0	0.00316816	0	0.299047	0.0715125	0	0
Sctr	0	0	0	0	0	0.622576	0	0.311768	0	0	0	0	0	0	0
Tmem37	0	0	0	0	0.0629574	0.595815	0.20502	0.6518	0.204443	0	0	0	0	0	0
Dbi	0	0.210778	0	0	0.166124	0.251585	0.184367	0	0	0.195933	0	0.241294	0.0995702	0	0
3110009E18Rik	0	0	0	0	0.296436	0.365198	0	0	0	0	0	0.0192891	0.0625017	0	0
Steap3	0	0.539847	0	0	0.192255	0	0.043863	0.121671	0.762063	0	0	0	0.248344	0	0
Marco	0	0	0	0	0	0	0.869734	0.803721	0	0	0	0	0	0	0
En1	0	0.857108	0.0802139	0	0.3613	0	0	0	0	0	0	0	0	0	0
Gm29346	0	0	0	0	0.740965	0	0	0	0	0	0.147498	0.409689	0	0	0
Insig2	0	0	0	0	0.0998418	0.256336	0	0	0	0.505243	0.612052	0.495202	0	0.597111	0
Ccdc93	0	0	0	0	0.0428511	0	0.0864822	0.415273	0.417006	0	0	0	0.333364	0	0
Ddx18	0	0.0697177	0	0	0.34164	0.0384445	0	0	0.0591352	0	0	0.0325428	0.0613658	0	0
Actr3	0	0.196493	0	0.325077	0.220258	0.136424	0.209535	0.160921	0.205674	0	0	0	0.196705	0	0
Slc35f5	0	0	0	0	0.0598511	0	0	0	0	0.379062	0.136693	0.282126	0	0.216296	0
Gpr39	0	0	0	0	0.738605	0.151967	0.0249804	0	0	0.307904	0	0	0	0	0
Lypd1	0	0	0.111056	0	0	0	0	0	0	0	0.48789	0.388938	0	0	0
Nckap5	0	0.0709497	0.123149	0.306666	0.0680426	0.414254	0	0	0	0	0	0	0	0	0.296734
Mgat5	0	0	0	0	0	0	0.0154393	0.445591	0.607225	0.074022	0	0.132992	0.0726361	0	0.202264
2900009J06Rik	0	0.00965795	0	0	0.0730172	0	0	0	0	0.353455	0.652908	0.18446	0	0.456649	0
Ccnt2	0	0.134987	0	0	0.0352766	0.0353034	0.00904393	0	0	0	0.0737365	0	0.0869628	0.169146	0.0119781
Rab3gap1	0	0.032763	0	0	0.0459574	0	0	0	0	0.281108	0.102163	0.0787434	0.0366762	0.233317	0
Zranb3	0	0	0	0	0	0	0.325786	0.797706	0.60941	0	0	0	0.117904	0	0
Gm28800	0	0.0465048	0	0	0	0	0.61815	0.489234	0	0	0	0	0	0	0
R3hdm1	0	0	0	0	0.123462	0	0	0	0	0.146252	0.511968	0.0272853	0	0.220548	0
Ubxn4	0.242011	0	0	0	0.179424	0.140407	0	0	0	0.217867	0.137819	0.244442	0	0.194984	0
Lct	0	0.231533	0	0	0.167621	0	0	0	0	0	0.0602373	0.706596	0	0	0
Mcm6	0.102838	0.163535	0	0.273244	0.354372	0	0	0.0603191	0.299921	0	0	0	0.340114	0	0.441291
Dars	0	0	0	0	0.334406	0.0537928	0	0	0	0	0.146857	0.199305	0.121633	0	0
Cxcr4	0.309397	0	0	0.229934	0	0	0.524278	0.868485	0.826517	0	0	0	0.410771	0	0.245448
Cd55	0.339697	0.0683886	0	0.431231	0.010617	0	0.234136	0.0157952	0	0	0	0	0.0709718	0	0.737956
Gm29427	0	0	0.436144	0	0.208132	0	0	0	0	0.0886856	0.386684	0.576042	0	0.0952381	0
Pfkfb2	0	0	0	0	0.0869149	0.000770372	0	0	0	0.0610073	0.259475	0.0235958	0.176795	0.103787	0
Yod1	0	0.0991873	0	0	0	0	0	0	0	0.643346	0.156507	0.250879	0.058787	0.461463	0
AA986860	0	0	0	0	0	0	0	0	0	0.696192	0.379582	0.332362	0	0.315334	0
Il19	0	0	0	0	0	0.149101	0.0168495	0.389408	0	0	0	0	0.135064	0	0.0525174
Il10	0.547604	0	0	0	0	0	0.444028	0.897664	0.671512	0	0	0	0.275926	0	0
Mapkapk2	0.1202	0	0	0.376992	0	0	0.335679	0.395867	0.129344	0	0	0	0.250168	0	0
Dyrk3	0.622257	0.00235543	0	0.000835003	0.0734894	0	0	0	0.0472059	0	0	0	0.653482	0.26541	0.451473
Eif2d	0	0	0	0	0.249401	0.107408	0	0	0	0	0	0.194498	0	0.0496303	0
Rassf5	0	0	0	0.560039	0.190766	0	0.134731	0.167625	0	0	0	0	0.134142	0	0.473437
Ikbke	0	0	0	0.558516	0	0	0.48562	0.617044	0	0	0	0	0	0	0
Gm28913	0	0	0	0.0750249	0.240555	0.47135	0	0	0.318742	0	0.119863	0.0383472	0	0	0
Srgap2	0	0.123524	0	0	0.0397234	0	0	0.0350859	0	0.0480284	0	0.238242	0.00468004	0.0960372	0
Fam72a	0	0	0	0	0.277388	0	0	0	0	0.451314	0	0.354278	0	0	0
Ctse	0.371149	0	0	0.82135	0	0	0.341735	0.103922	0	0	0	0	0	0	0.731701
Rab7b	0	0	0	0	0	0	0.544317	0.941634	0.934682	0	0	0	0.494605	0	0
Slc26a9	0	0	0	0.269089	0	0	0.125964	0.158095	0.243757	0	0	0	0.762649	0	0.0562477
Pm20d1	0.419884	0	0	0	0.229036	0	0	0.395751	0	0	0	0.0378806	0	0	0
Slc41a1	0.0712851	0	0	0	0.203978	0.0510335	0	0	0	0.312042	0.402524	0.040034	0	0.147482	0
Rab29	0	0	0	0	0.224235	0.108614	0.139084	0.00194354	0.159299	0	0	0	0.0680038	0	0
Nucks1	0	0.0104363	0	0	0.377167	0.263604	0	0	0	0.0818329	0	0.0376913	0.015425	0	0
Slc45a3	0	0	0	0	0.00714894	0	0	0.0211329	0.0347003	0	0	0	0.927975	0.239389	0.420612
Elk4	0	0.0115483	0	0	0.0838298	0.221674	0	0	0	0.273376	0	0	0	0.0834281	0.084891
Mfsd4a	0.61839	0.292308	0	0.0951513	0.0228085	0.151769	0	0	0	0.260874	0	0	0	0.15238	0.0800321
Cdk18	0	0	0	0	0.162723	0	0	0.400666	0.945339	0	0	0	0.663945	0	0
Lemd1	0	0.583512	0	0	0.454405	0.595162	0	0	0	0	0	0	0	0	0
Klhdc8a	0	0	0.48078	0	0.829297	0.0177974	0	0	0	0	0	0	0	0	0
Nuak2	0	0.356993	0	0.0976857	0	0	0.407863	0.337107	0.731807	0	0	0	0.680397	0	0
F730311O21Rik	0	0	0	0.126289	0	0	0.382018	0.524565	0.610976	0	0	0	0	0	0.267951
Tmcc2	0	0.00301811	0	0	0.439976	0.283051	0	0	0	0	0	0.109856	0	0	0
Dstyk	0	0	0	0	0.128213	0.141321	0	0	0	0	0.0379669	0.00424603	0	0.0495829	0
Rbbp5	0	0.0418306	0	0	0.0841064	0	0	0	0.567299	0	0	0	0	0	0
Tmem81	0	0.0760378	0	0	0.0727872	0	0	0	0.26502	0	0	0	0.255618	0	0
Mdm4	0.199127	0	0	0.0435872	0.26882	0.200362	0	0	0	0	0.0458288	0	0.0267431	0	0.161654
Pik3c2b	0.402764	0.460889	0	0.745521	0.113043	0.0759244	0	0	0	0	0	0	0	0	0
Ppp1r15b	0	0	0	0.0471298	0.00606383	0.316468	0.171445	0	0	0	0	0	0	0	0
Plekha6	0	0	0	0.173602	0	0	0.784867	0	0	0	0.113671	0	0	0.26485	0
Sox13	0	0.839967	0	0.0887459	0.150979	0.110877	0	0	0	0	0	0.0615977	0	0	0
Snrpe	0	0.202352	0	0	0.284052	0.175632	0.0618863	0	0	0.0844436	0.100231	0.087365	0.173496	0	0.166154
Gm26706	0	0.561556	0	0.0754907	0	0.0151792	0	0	0	0.0500406	0	0	0.040666	0	0.0461361
Zc3h11a	0	0	0	0	0	0.000913034	0	0	0	0.236021	0.132731	0.126046	0	0.0349366	0
Gm38394	0	0	0	0	0	0	0	0	0	0.342445	0.27442	0.137541	0	0.11018	0
Lax1	0.7987	0	0	0	0.0714043	0	0	0	0	0.322741	0	0.0845263	0	0.0707188	0.580518
Atp2b4	0	0.151326	0	0	0.381089	0	0	0	0	0.408795	0	0	0.394316	0.243245	0.254624
Optc	0	0.0134809	0	0	0.515199	0.63222	0	0	0	0	0.0393836	0.0906064	0	0	0
Prelp	0	0	0.314256	0	0.885983	0.54629	0	0	0	0	0.0665362	0.0803805	0	0	0
Gm1627	0	0	0.424888	0	0	0	0	0	0	0.643148	0.146083	0.468211	0	0.296277	0
Fmod	0	0	0.244383	0	0.636694	0	0	0	0	0.293316	0.675046	0.630007	0	0	0
Btg2	0	0	0.119324	0	0.254973	0.374495	0	0	0	0.482344	0.308922	0.330222	0	0.425407	0
Chil1	0	0	0.140709	0.988227	0	0	0.108154	0	0	0	0	0	0	0	0
Adora1	0	0	0.412589	0	0	0.703248	0	0	0	0	0	0	0	0.432895	0
Ppfia4	0	0	0	0	0	0	0.083366	0.0222995	0	0.158609	0.356583	0.338921	0	0.0970212	0
Tmem183a	0	0	0	0	0.191276	0	0	0	0.083673	0.0170598	0	0.102447	0	0	0
Cyb5r1	0	0	0	0	0.208352	0	0	0	0	0	0.619554	0	0	0	0
Adipor1	0	0.094568	0	0.309264	0	0	0.136693	0.10945	0	0.136658	0.173322	0.144187	0.0244508	0.152114	0
Platr1	0	0	0	0.327351	0	0	0	0	0	0.102478	0.0806415	0	0	0	0.214248
Klhl12	0.031803	0	0	0	0.129213	0.178498	0	0	0	0	0	0	0.391009	0	0.134179
Rabif	0	0	0	0	0.172383	0	0	0	0	0	0.0679744	0.355001	0	0	0
Kdm5b	0	0	0	0	0.204138	0.129959	0	0	0	0.262154	0.510925	0.300285	0	0.386678	0
Syt2	0.0775709	0	0	0	0.33143	0.10314	0	0	0	0.0319106	0.0802348	0.339937	0	0.169917	0
Ppp1r12b	0	0	0	0	0.199791	0.493118	0	0	0	0	0	0	0.549208	0	0
Ube2t	0	0	0	0.246603	0.389444	0	0	0	0	0	0.0897122	0	0.266247	0	0
Lgr6	0	0	0	0	0	0	0	0	0	0.608899	0.853936	0	0	0.925745	0
Ptpn7	0.225787	0	0	0.666081	0	0	0.332942	0.389556	0.76042	0	0	0	0.455497	0	0.534692
Arl8a	0	0.17485	0	0	0.113103	0	0.330608	0.482079	0.618818	0	0	0	0.139971	0	0
Gm15445	0	0	0	0	0	0	0.409917	0.641524	0.328581	0	0	0	0.0820525	0	0
Gpr37l1	0	0.904787	0.376908	0	0	0	0	0	0	0	0	0.305536	0	0	0
Rnpep	0	0	0	0	0	0.00627711	0.195722	0.453621	0.202225	0	0	0.0135873	0.474935	0	0
Timm17a	0	0.154363	0	0	0.324715	0.128772	0	0	0	0.173733	0.120306	0.337191	0.163372	0.126422	0
Lmod1	0	0	0.184724	0	0.947071	0.67786	0	0	0	0	0	0	0	0	0
Shisa4	0	0.268425	0	0	0.0140638	0.39651	0	0	0	0.586551	0	0.489828	0	0.824055	0
Ipo9	0	0.00637297	0	0	0.47688	0.534996	0	0	0	0	0	0	0	0	0
Nav1	0	0.175492	0	0	0	0.187483	0	0.153796	0	0.441064	0	0.434004	0.292341	0	0
Gm4793	0	0	0.441681	0	0	0	0	0	0	0.265492	0.577462	0.279111	0	0.214178	0
Gm38399	0	0	0	0	0.101097	0.528014	0	0	0	0.250191	0	0.289352	0	0	0
Csrp1	0	0.32016	0	0	0.601403	0.186629	0	0	0	0.150501	0.00503885	0.124746	0	0.118885	0
Phlda3	0	0.187382	0.192374	0	0.638058	0.573189	0	0	0	0	0	0.24582	0	0.0895255	0
Tnni1	0	0	0	0	0	0	0	0	0	0.314609	0.0482624	0	0	0.959232	0
Lad1	0	0	0	0	0	0	0.285994	0.291262	0	0.0966288	0	0	0.862115	0	0.476975
Tnnt2	0	0.24824	0	0	0	0	0	0	0	0.632795	0.306382	0.0269016	0	0.337201	0
Tmem9	0.156805	0	0	0	0.432072	0.46067	0	0	0	0.0419517	0	0.286029	0	0.233832	0
Cacna1s	0.941335	0	0	0	0	0	0	0	0	0	0	0	0	0.287935	0.0882309
Kif21b	0.0904261	0	0	0.138617	0.251191	0	0	0	0	0	0.642527	0	0	0	0.160935
Mroh3	0	0.551283	0	0	0	0	0	0	0	0.174208	0.0333742	0	0	0.605404	0
5730559C18Rik	0	0.69457	0	0	0.292001	0	0	0	0	0	0	0.0781572	0	0	0.11425
Camsap2	0	0.130368	0	0	0.059383	0.109774	0	0	0	0.261036	0.0186773	0.300632	0	0.0841866	0
Ddx59	0	0	0	0	0	0	0	0	0	0.409021	0	0.483528	0	0.342085	0
Kif14	0	0	0	0.631676	0.445951	0	0	0	0	0	0	0	0.311496	0	0.290666
4933409D19Rik	0	0	0	0	0	0	0	0	0	0.583992	0	0.745835	0	0.148011	0
Platr23	0	0.208269	0.0721866	0	0	0	0	0	0	0	0.589206	0.505642	0	0.263792	0
Zfp281	0	0.168507	0	0.0409779	0.00178723	0	0	0	0	0.125472	0.164221	0	0.198456	0.34642	0
Gm19705	0	0	0	0	0	0	0	0	0	0.65335	0.761009	0.525894	0	0.839319	0
Platr22	0	0	0	0	0	0	0	0	0	0	0.727582	0	0.139556	0.583006	0
A430106G13Rik	0.00343528	0	0.00222113	0	0	0	0	0	0	0	0.825202	0.219439	0	0.303304	0
Ptprc	0.0156093	0	0	0.674655	0	0	0.60071	0.674364	0.518232	0	0	0	0.444337	0	0.557996
Nek7	0.171019	0.231876	0	0	0.212583	0.0903096	0.152854	0.0384523	0	0	0	0	0.298119	0	0
Lhx9	0	0.211835	0	0	0.267017	0.414879	0.530258	0	0	0	0	0	0	0	0
2310009B15Rik	0	0	0	0	0.374231	0.079646	0	0	0	0.172533	0	0.107135	0.0649952	0.0616231	0
Dennd1b	0	0	0	0.347028	0	0.023853	0.521127	0	0	0	0	0	0.359799	0.363186	0.136577
Zbtb41	0	0.128058	0	0	0.11186	0	0	0	0	0.169686	0.211975	0.456865	0	0.147156	0
Aspm	0	0	0	0.586174	0.44199	0	0	0	0	0	0	0	0.267032	0	0.476277
Gm4788	0	0	0	0	0	0	0	0	0	0.702974	0	0.187423	0.345292	0.230977	0
Cfhr2	0	0	0	0	0	0	0.0515282	0	0	0.81171	0.00784599	0.366107	0	0.270594	0
Cfh	0	0	0.0231984	0	0	0.277799	0	0	0	0.715427	0.506245	0.62187	0	0.477675	0
Kcnt2	0	0	0.07231	0	0.255759	0.0716323	0	0	0	0.616645	0.301935	0.732113	0	0	0
Cdc73	0	0.114799	0	0	0.0883815	0.0161544	0	0	0	0.253447	0.188382	0.274776	0	0.0830489	0
B3galt2	0	0.443693	0	0	0	0.557973	0	0	0	0.59094	0	0.181275	0	0.353461	0
Glrx2	0	0.137553	0	0	0.246781	0.340587	0	0	0	0	0	0.233773	0.0683859	0	0
Trove2	0	0.315234	0	0	0.463596	0.127924	0	0	0	0.0688109	0.173039	0.497589	0	0.00583049	0
Uchl5	0	0.121129	0	0.0732579	0.104986	0	0	0	0.352826	0	0	0.0117979	0.223608	0	0
Rgs2	0	0	0	0.159253	0	0.0528425	0	0	0.301899	0.332832	0.305616	0.0717035	0	0.0547971	0.369507
Rgs13	0	0	0	0	0	0	0	0	0	0.315848	0	0	0	0.86889	0.702685
Rgs1	0	0	0	0	0	0	0.488873	0.791068	0.954389	0	0	0	0.0665712	0	0.562698
Rgs18	0	0	0	0.845364	0	0	0	0.766383	0.642708	0	0	0	0.0445085	0	0.467423
Brinp3	0	0	0.0162883	0	0.750063	0	0	0	0	0	0	0	0	0	0.420527
Pla2g4a	0	0	0	0	0.0372553	0	0	0	0	0.39151	0.688325	0.458935	0	0.548628	0
Ptgs2	0	0	0.0711994	0	0.023617	0	0.377956	0	0	0.100753	0.486125	0.0748035	0	0.623191	0
Ptgs2os2	0	0	0	0.627362	0	0	0.631702	0.0409586	0.426071	0	0	0	0	0	0.425284
BC003331	0.119034	0	0	0	0.192734	0.18951	0	0	0	0.230781	0.35328	0.261961	0	0.0446056	0
Tpr	0	0.136826	0	0.0735638	0.191513	0.0894067	0.11363	0	0	0.163992	0.12932	0	0.101337	0	0.129751
Prg4	0.112145	0	0.35008	0	0.516008	0.489988	0	0	0	0	0	0	0	0	0
Hmcn1	0	0.907733	0	0	0.250677	0	0	0	0	0.125955	0	0	0	0	0
Gm10138	0	0	0	0	0.0144894	0	0	0	0	0.406126	0.321733	0.498149	0	0.105449	0
Ivns1abp	0	0.295452	0	0	0.130049	0	0	0	0	0.245301	0.00524342	0.339258	0.474003	0	0.111081
Swt1	0.0634391	0.159516	0	0	0.127316	0.335208	0	0	0	0.116376	0	0	0	0.210297	0.155144
Trmt1l	0	0.0677074	0	0	0.140681	0.281451	0	0	0.171722	0	0	0	0.0397326	0	0.0752436
Rnf2	0	0	0	0	0.240685	0.235678	0	0	0	0	0	0	0	0	0
Fam129a	0	0.139607	0	0	0	0	0	0	0	0.379663	0.571939	0.0775323	0	0.551425	0
2810414N06Rik	0	0	0	0	0.0619248	0.0813226	0	0	0	0	0	0.324637	0	0	0
Edem3	0.219208	0	0	0	0.0206383	0	0	0	0	0.262644	0.168944	0.45362	0	0.205697	0
1700025G04Rik	0	0.508031	0	0	0.00108511	0	0	0	0	0.0169698	0.545968	0	0.122254	0.735979	0
Tsen15	0	0	0	0	0.486587	0.479805	0	0	0	0	0	0	0	0.207688	0
Colgalt2	0	0	0	0	0	0	0	0	0	0	0.942232	0	0	0.52191	0
Rgl1	0	0	0	0	0	0.486112	0.791477	0.669456	0.526832	0	0	0	0	0	0
Arpc5	0	0.184303	0	0.321638	0	0	0.293469	0.34816	0.336977	0	0	0	0.222541	0	0.148153
Ncf2	0	0	0	0.696513	0	0	0.617543	0.77549	0.696039	0	0	0	0.443695	0	0.0894673
Smg7	0	0.123011	0	0	0.0620426	0	0	0	0.360547	0	0.0820153	0	0	0	0
Nmnat2	0	0	0	0	0.665913	0.280038	0	0	0	0	0	0	0	0	0.665758
Lamc2	0	0	0	0	0.205064	0.0424275	0	0	0	0.163755	0	0	0.652723	0.0534355	0
Lamc1	0	0.464493	0	0	0.447167	0.536317	0	0	0	0	0	0	0	0	0
Shcbp1l	0	0	0	0.436347	0.0914894	0	0.595034	0.0305394	0	0	0	0	0	0	0
Dhx9	0	0.111249	0	0	0.102937	0.147973	0	0	0	0.197392	0	0.0738708	0.098233	0	0.135046
Npl	0	0	0	0	0	0	0.659829	0.795958	0.260894	0	0	0	0	0	0.0765354
Rgs8	0	0.758069	0	0	0	0	0	0	0	0	0.893846	0.2607	0	0	0
C230024C17Rik	0.505446	0.300018	0	0	0	0.287198	0	0	0	0	0.0954149	0	0	0	0
Rgs16	0	0.538297	0	0	0.576806	0.349534	0	0	0	0	0.466685	0.103224	0	0	0
Rnasel	0	0	0	0.323479	0	0.250661	0.688989	0.327071	0	0	0	0	0	0	0.298337
Teddm2	0	0	0	0	0.0557234	0.457598	0	0	0	0	0	0	0	0	0.127015
Glul	0	0	0	0	0	0.628078	0.358878	0.641051	0.538568	0	0	0	0	0	0
Gm29291	0	0	0	0	0	0	0.0327194	0.699811	0.685716	0	0	0	0	0	0
Cacna1e	0.886947	0	0	0	0	0.250913	0.065785	0	0	0	0	0	0	0	0
Ier5	0.230192	0.147348	0	0	0	0	0.178036	0.198222	0.467541	0.333747	0	0	0	0.170743	0
Mr1	0	0	0	0	0.290389	0.482772	0	0	0	0.0245257	0.0310054	0.307305	0	0	0
Stx6	0	0.220391	0	0	0.00442553	0.371622	0.174655	0.0740823	0.14417	0	0	0	0	0	0.0056879
BC034090	0	0.513044	0	0	0.549438	0.381525	0	0	0	0	0.171827	0	0	0	0
Xpr1	0	0	0	0	0	0	0.152614	0	0.0850177	0.213862	0.0569966	0.0160742	0.642324	0.410111	0
Gm5532	0	0	0	0	0	0	0	0	0	0	0.200235	0	0.97092	0	0
Acbd6	0	0.000898204	0	0	0.266878	0.0583788	0	0	0	0.0154393	0.419325	0.00558049	0	0.0944255	0
Lhx4	0	0	0.215996	0	0.23307	0.612211	0	0	0	0	0.135641	0	0	0.0932782	0
Qsox1	0	0	0.117349	0	0.521711	0	0	0	0	0.183859	0.402949	0.463682	0	0	0
Cep350	0	0	0	0	0	0.0857254	0.0824289	0	0	0.15394	0	0	0	0	0
Tor1aip1	0	0.00141146	0	0	0.049257	0.156646	0.138501	0	0	0.151876	0	0	0	0	0
Tor1aip2	0	0.132036	0	0	0.227283	0.153794	0	0	0	0.0790871	0	0.180997	0	0.0876469	0
Tdrd5	0	0	0	0	0	0	0	0	0.0447274	0	0	0	0.659709	0	0.673239
Axdnd1	0	0.0630952	0	0	0.0511702	0.342785	0	0.092891	0.0566481	0	0	0	0	0	0.0699508
Gm2000	0	0	0	0	0.31426	0	0	0	0	0.144346	0.240549	0.238867	0	0	0
Soat1	0	0	0	0	0	0.357812	0.420916	0.283102	0.71141	0	0.125636	0	0.0750239	0	0
Gm10031	0	0.0632592	0	0	0.23764	0.025622	0	0	0	0	0.31638	0.0226253	0	0.0409932	0
Abl2	0	0.222514	0	0	0	0	0.102713	0.283152	0.567963	0.245827	0	0	0.355465	0	0
Tor3a	0	0	0	0	0.0327234	0	0.303018	0.0824102	0.0282376	0	0	0	0.242943	0	0
Fam20b	0	0.0782293	0	0	0.112277	0.203296	0	0	0	0	0	0.0840713	0	0	0
Ralgps2	0.644199	0	0	0	0	0	0	0	0	0.640567	0.339918	0.466566	0	0.498935	0
Tex35	0.506405	0.127283	0	0	0.0504894	0	0	0	0	0.0718115	0.0957976	0.123256	0	0	0
Rasal2	0	0.274948	0	0	0.438018	0	0	0	0	0.150868	0.0202848	0.229965	0.481141	0	0
Cryzl2	0	0	0	0	0.025617	0	0	0	0	0.391483	0.251746	0.625318	0.248533	0.18052	0
Sec16b	0	0	0	0	0.0464345	0	0	0	0	0.751671	0.2595	0.858402	0	0.0857613	0
Astn1	0	0	0.474682	0	0.649694	0.12119	0	0	0	0.0575203	0	0.583527	0	0	0
Pappa2	0	0	0.144003	0	0.872628	0.511811	0	0	0	0	0.155149	0.142866	0	0	0
Cop1	0	0	0	0	0.232954	0.216158	0	0	0	0.153538	0.124612	0.0266097	0	0.0538491	0
Tnr	0.0699246	0	0	0	0	0	0.119275	0.758791	0.548607	0	0	0	0	0	0
4930523C07Rik	0	0	0	0	0.321732	0	0	0	0	0.469919	0.281301	0	0.311539	0.521106	0.110278
4930562F07Rik	0	0	0	0	0.272468	0	0	0	0	0.11182	0.0657532	0	0.469304	0.080444	0
Tnn	0	0	0.268282	0	0.702169	0	0	0	0	0	0.761751	0.635183	0	0	0
Mrps14	0.110184	0	0	0	0.263615	0.150925	0	0	0	0.25925	0.131112	0.328161	0.159265	0.230972	0
Cacybp	0	0.0888794	0	0	0.432848	0.143688	0	0	0	0	0	0	0.163085	0	0
Rabgap1l	0.423494	0	0	0	0.024	0.224467	0	0	0	0.232816	0.048071	0.302538	0	0	0.317
Gm37083	0.306039	0	0	0	0	0	0.0507075	0	0	0.34622	0.0160747	0.181063	0	0.135359	0.298806
Rc3h1	0	0.00312233	0	0	0	0.0101636	0	0	0	0.481218	0.0414313	0.0214459	0.00243553	0.284717	0
Serpinc1	0	0	0	0	0	0	0	0	0	0.667957	0.435182	0.413699	0	0.240941	0
Zbtb37	0	0.0236099	0	0	0.235339	0.626233	0	0	0	0	0	0	0	0	0
Gm37362	0	0	0	0	0	0	0	0	0	0.756425	0.523811	0.437268	0	0.187363	0
Dars2	0	0	0	0	0.273526	0.297114	0	0	0	0	0	0.0405192	0	0	0
Gm37634	0	0	0	0	0	0	0	0	0	0.631252	0.561816	0.232052	0	0.287576	0
Cenpl	0	0	0	0.161807	0.152191	0	0	0	0	0.196937	0	0.245967	0	0	0.158819
Klhl20	0	0.0815654	0	0	0.161319	0.271487	0	0	0	0	0	0.0348174	0	0	0
Prdx6	0.0919032	0.174423	0	0.471188	0.257278	0.218096	0.140698	0	0	0	0	0.076805	0	0	0.281464
Tnfsf4	0	0	0	0	0	0	0.481983	0.101005	0	0	0	0	0	0	0.894761
Tnfsf18	0.381494	0	0	0	0	0	0	0.691348	0	0	0	0	0	0	0
Suco	0.312099	0.0626604	0	0	0.0670807	0.14951	0	0	0	0.166872	0.204043	0	0	0	0
4930558K02Rik	0.332018	0	0	0	0.107443	0	0	0	0	0.236174	0.0265233	0.228334	0	0	0.117568
Pigc	0	0	0	0	0.263788	0	0	0	0	0	0.0234997	0.0593231	0	0.336939	0
Gm38304	0	0	0.152641	0	0.3249	0.0521141	0	0	0	0.229043	0.242677	0.0217004	0	0.127976	0
Dnm3	0.223296	0.565439	0	0	0.141553	0.145714	0	0	0	0.152583	0	0.10976	0	0.0102537	0.19446
2810442N19Rik	0	0	0	0	0.330582	0.238328	0	0	0	0.556703	0	0.179698	0	0.181134	0
Dnm3os	0	0	0.167325	0	0.518872	0.275695	0	0	0	0.810077	0.126829	0.464816	0	0.40596	0
Mettl13	0	0.062361	0	0	0.270158	0	0	0	0.321602	0	0	0.0683914	0	0	0
Vamp4	0	0	0	0	0	0	0	0	0	0.224247	0.212936	0.328357	0.259604	0.35853	0
Prrc2c	0	0.174594	0	0	0.217661	0.231498	0	0	0.0572695	0.142309	0	0	0.0468004	0	0.225076
Fmo4	0	0	0	0	0.270903	0.905758	0	0	0	0	0	0	0	0	0
Fmo1	0	0	0.246299	0	0.00471513	0.941509	0	0	0	0	0	0	0	0	0
Fmo2	0	0	0.266131	0	0	0.938856	0	0	0	0	0	0	0	0	0
Fmo3	0	0	0	0	0.379959	0.830654	0	0	0	0	0	0	0	0	0
Prrx1	0	0	0.284783	0	0.659032	0.545084	0	0	0	0.196305	0.174906	0.609761	0	0	0
Gm26523	0	0	0.279333	0	0.723467	0.36939	0	0	0	0.0719512	0.118395	0.128002	0	0	0
Gorab	0	0	0	0	0.434786	0	0	0	0	0.0120596	0.366509	0.569473	0	0	0
Kifap3	0	0.168212	0	0	0.565442	0.308196	0	0	0	0	0	0.00357879	0	0	0
Scyl3	0	0	0	0	0	0.00336681	0.0366925	0	0.255597	0	0	0.0532876	0.144401	0	0.133925
BC055324	0	0	0	0.175583	0.401682	0	0	0	0	0	0.150395	0	0	0	0.0757289
Mettl18	0.171784	0	0	0	0.181021	0.199254	0	0	0.120992	0	0	0	0.00448902	0	0.129651
Sele	0	0.8476	0	0	0	0	0	0.6231	0.213391	0	0	0	0	0	0
Sell	0	0	0	0.873552	0	0	0.89235	0	0	0	0	0	0	0	0.468466
Selp	0	0.470722	0	0.565123	0	0	0.787429	0	0	0	0	0	0.608651	0	0.29347
F5	0	0	0	0.900786	0	0.17807	0.388456	0	0	0	0	0	0	0	0
Slc19a2	0	0.0601796	0	0	0.617911	0	0	0	0	0	0.14521	0	0	0	0
Ccdc181	0	0.190902	0	0	0.0575957	0	0	0	0.394176	0	0.0691212	0	0.312795	0	0.0202757
Blzf1	0	0.100043	0	0	0.0174681	0	0	0	0	0.0761601	0.352262	0.519371	0	0.115205	0
Nme7	0	0.0565868	0	0	0.335495	0.210542	0	0	0	0	0	0.21537	0	0	0
Atp1b1	0.418625	0.615939	0	0.0429579	0	0	0.0385195	0.0125272	0	0.126442	0.192131	0	0	0.37931	0.557695
Dpt	0	0	0	0	0.232472	0	0	0	0	0.344656	0.7644	0.196848	0	0.276736	0
Sft2d2	0.553367	0.377614	0	0.00793253	0	0	0.322093	0.237752	0.484341	0	0	0	0.423575	0.0651907	0.0944192
Tiprl	0	0.200941	0	0	0.30054	0.0424723	0	0	0	0.200329	0.208826	0.171492	0	0	0
Gpr161	0	0.503582	0.105627	0	0.653127	0.521084	0	0	0	0	0	0	0	0	0
Dcaf6	0	0	0	0	0	0	0	0	0	0.542162	0.518441	0.37985	0	0.638416	0
Mpc2	0.15	0	0	0.249493	0.240266	0.396991	0	0	0	0.150932	0	0.184931	0.21638	0.0652256	0
Adcy10	0	0	0	0.182863	0	0.508054	0	0	0	0	0	0.09767	0	0	0
Mpzl1	0	0.00179641	0.0324531	0	0.588614	0.552697	0	0	0	0.270541	0	0.417331	0	0	0
Rcsd1	0	0	0	0.822407	0	0	0.172812	0.498433	0	0	0	0	0	0	0.60173
Creg1	0.126711	0	0	0	0	0	0.342382	0.49372	0.458954	0	0	0	0.244529	0	0
Cd247	0	0	0	0	0	0	0.0568565	0	0	0	0	0	0	0	0.84361
Pou2f1	0	0.283212	0	0	4.25532e-05	0.0987513	0.019832	0	0	0.157894	0	0	0.065234	0.152235	0.115433
Dusp27	0	0	0	0	0.176199	0.106674	0	0	0	0.756159	0	0.762492	0	0.12275	0
Mael	0	0	0.181958	0	0.296923	0	0	0	0	0.274961	0.248307	0.140973	0	0.087108	0
Ildr2	0	0	0	0	0.0603737	0	0	0.111745	0	0.374764	0.455982	0.455082	0	0	0
Gm15853	0	0	0	0	0.054617	0.326637	0	0.00981997	0	0	0	0.0918401	0	0	0
Tada1	0	0.0692472	0	0	0.400332	0.202749	0	0	0	0	0	0.0653888	0	0	0
Pogk	0	0	0	0	0.08	0	0	0.207977	0.30522	0	0	0	0.041213	0	0
Gm16701	0	0.358292	0	0	0	0	0	0	0	0.861915	0	0.489599	0	0.522548	0
Gm16701.1	0	0.331743	0	0	0	0.0318706	0	0	0	0.742707	0.136897	0.0826762	0	0.393912	0
Fam78b	0	0.299672	0	0	0	0	0	0	0	0.911237	0.0962411	0.557205	0	0.586128	0
Uck2	0.105927	0.25174	0	0	0.336638	0	0.0883721	0	0	0.375887	0.283766	0	0	0.338734	0
Tmco1	0	0	0	0	0.216576	0.216864	0	0	0	0.32194	0.219799	0.374298	0	0.233118	0
Aldh9a1	0.334403	0	0	0	0.0607447	0.328339	0.0587209	0	0	0	0	0	0.0465616	0	0
Mgst3	0	0	0	0	0	0.062593	0	0	0	0.526579	0.576183	0.369279	0.109551	0.655454	0
Rxrg	0	0.749883	0	0	0	0.115185	0	0	0	0	0.0479562	0.0575033	0	0.283428	0.333452
Gm20711	0	0	0	0	0.715001	0.602211	0	0	0	0	0	0	0	0.00820267	0
Pbx1	0	0	0	0	0.274831	0.552564	0	0	0	0.101582	0	0	0.550589	0	0
Nuf2	0	0	0	0.752287	0.491747	0	0	0	0	0	0	0	0.283425	0	0.421025
Rgs5	0	0	0.0741609	0	0	0	0	0	0	0.928791	0.677629	0.535904	0	0.0311985	0
Rgs4	0	0	0.135365	0	0.700202	0.645671	0	0	0	0.415536	0.133945	0	0	0	0
Ccdc190	0	0	0	0	0.610486	0.66857	0	0	0	0	0	0.338827	0	0	0
Hsd17b7	0	0	0	0.0031572	0.254326	0.396204	0	0	0	0.559246	0	0.542979	0	0	0
3110045C21Rik	0	0	0	0.126288	0.181402	0.483408	0	0	0	0.00555556	0	0	0.0883546	0	0
Ddr2	0	0	0.16387	0	0.619652	0.505149	0	0	0	0.514637	0.276237	0.715325	0	0	0
Uap1	0	0	0	0	0.194516	0	0	0	0	0.631711	0.106098	0.359674	0	0.303752	0
Gm37748	0	0	0.385013	0	0	0	0	0	0	0.692887	0.246794	0.213437	0	0.430494	0
Gm37502	0	0.669833	0	0	0.0542979	0	0	0	0	0	0.142032	0	0.437529	0.155761	0
Uhmk1	0	0.0923011	0	0	0.0126383	0.0312999	0.224363	0.207517	0.447771	0	0	0	0.38987	0	0
4930500M09Rik	0.0325798	0	0	0	0	0	0	0	0	0.176688	0.17078	0	0.0941772	0.296228	0.127445
Gm7694	0	0	0	0.482503	0.019234	0.106026	0	0	0	0	0	0	0.821394	0	0
Nos1ap	0	0	0	0.635737	0.00891489	0.0574926	0	0	0	0.101503	0	0	0.725704	0	0
Olfml2b	0	0.197529	0.162883	0	0.826011	0.742658	0	0	0	0	0	0	0	0	0
Atf6	0.364689	0	0	0	0.0405532	0	0	0	0	0.349151	0.0703051	0.033119	0.171412	0	0
Dusp12	0	0	0	0	0.404461	0	0	0	0	0.028718	0	0.466038	0	0	0
Gm26620	0	0	0	0	0	0	0	0	0	0.452996	0.143462	0.276837	0	0.443025	0
Fcrlb	0	0	0	0	0	0	0.634636	0.247026	0	0.101381	0	0	0.222548	0	0
Fcrla	0.92729	0	0	0	0	0	0.257816	0	0	0	0	0	0.076609	0	0
Fcgr2b	0	0	0	0.44253	0	0	0.892015	0.822965	0.266003	0	0	0	0	0	0
Gm10522	0	0	0	0.0824033	0	0	0.346098	0.206765	0	0.078554	0.0157303	0	0.281172	0	0.351869
Fcgr4	0	0	0	0.4504	0	0	0.956585	0.569859	0	0	0	0	0.119874	0	0
Fcgr3	0	0	0	0.519827	0	0	0.646875	0.884155	0.791078	0	0	0	0	0	0
Cfap126	0	0	0	0	0.188101	0.488405	0	0	0	0.103204	0.0128425	0.323322	0	0	0
Sdhc	0	0	0	0	0.291431	0.173554	0	0	0	0.0952017	0	0.21736	0.262848	0	0
Mpz	0	0	0	0	0	0	0	0.315818	0	0	0.115311	0.0508613	0	0	0
Pcp4l1	0	0	0	0	0.598846	0	0	0.182546	0	0	0	0	0.396892	0	0
Tomm40l	0	0	0	0	0.201312	0.0607453	0	0	0	0	0	0.0716062	0.364391	0	0
Fcer1g	0	0	0	0.579565	0	0	0.56644	0.77809	0.618309	0	0	0	0.423103	0	0.223521
Ndufs2	0	0.111035	0	0	0.304611	0.284888	0	0	0	0.142915	0.103327	0.137246	0.216667	0.0947099	0
Adamts4	0	0.134156	0	0	0.507726	0.232753	0	0	0	0.67015	0	0.718665	0	0	0
B4galt3	0	0.0532506	0	0	0.118319	0.125341	0	0	0	0	0.0325321	0.154411	0	0	0
Ppox	0	0	0	0	0.0845745	0.42354	0	0	0	0	0.106017	0	0	0	0
Usp21	0	0	0	0	0.11983	0.224904	0	0	0	0	0	0.0769441	0	0	0
Ufc1	0.102421	0	0	0	0.204154	0	0	0	0	0.289464	0.34632	0.353178	0	0.275123	0
Gm20045	0	0.127266	0	0.0421482	0.0154043	0.103258	0	0	0	0.0141755	0.0681261	0.114855	0	0.0564482	0.00535301
Dedd	0	0.0615056	0	0	0.133574	0.013667	0	0	0	0	0.0621938	0.0948077	0	0	0
Nit1	0	0	0	0	0.15172	0.397949	0	0	0	0	0	0	0	0	0
Pfdn2	0	0.142087	0	0	0.311991	0.217158	0	0	0.148783	0	0	0	0.155253	0	0
Klhdc9	0.44403	0	0	0.644687	0	0.161949	0	0	0	0	0	0	0	0	0.0141316
Nectin4	0.606897	0	0	0	0	0	0.275207	0.596606	0.438655	0	0	0	0.0560359	0	0
Arhgap30	0.355845	0	0	0.665294	0	0	0.508039	0.538725	0.624233	0	0	0	0.380669	0	0.522376
Usf1	0.180969	0	0	0	0.121809	0.19021	0	0	0.050373	0	0	0	0	0	0
F11r	0.388298	0.718325	0	0	0	0.196445	0.409786	0	0.0808923	0	0	0	0.171477	0	0
B930036N10Rik	0.498843	0	0	0.0475952	0	0	0	0	0	0.526959	0	0.119253	0	0	0.0811028
Alyref2	0	0	0	0	0.0757021	0	0	0	0	0.0187246	0	0.517711	0.0137536	0	0
Itln1	0.456097	0	0	0	0	0.179639	0.100489	0	0.124268	0	0	0	0.892593	0	0.169951
Cd244	0	0	0	0	0.188957	0	0.737819	0.451711	0	0	0	0	0.0105668	0	0.540528
Ly9	0.11987	0	0	0	0	0	0.737624	0.795653	0.898342	0	0	0	0.217517	0	0.0167291
Slamf7	0.768057	0	0	0	0	0	0.831609	0.472756	0.411275	0	0	0	0	0	0
Cd48	0.238825	0	0	0	0	0	0.518053	0.912334	0.745693	0	0	0	0.211962	0	0.477088
Slamf1	0	0	0	0	0	0	0.172721	0	0	0	0	0.176604	0	0	0.710529
Cd84	0	0	0	0.0605377	0	0	0.597025	0.875989	0.892494	0	0	0	0.563527	0	0.316767
Gm10521	0	0	0	0	0	0	0.364695	0.700833	0.468337	0	0	0	0.0854147	0	0.357203
Gm37065	0.408141	0	0	0	0	0	0	0	0	0.142161	0.0159982	0.0607788	0	0.0487315	0.229966
Slamf6	0.617508	0	0	0	0	0	0.52312	0.166084	0	0	0	0	0.0541947	0	0.789274
Vangl2	0	0.378595	0	0	0.394263	0.658672	0	0	0	0	0	0	0	0	0
Ncstn	0	0	0	0	0.026383	0	0.106728	0	0	0.0333543	0.159022	0.175167	0.0407832	0	0
Copa	0	0	0	0	0.145083	0	0	0	0	0.28585	0.269559	0.366294	0	0.143914	0
Gm37756	0.298774	0	0.662581	0	0.00504255	0.053869	0	0	0	0.037896	0.0151944	0	0	0	0
Pex19	0	0.0846878	0	0	0.343806	0.544014	0	0	0	0	0	0	0.0136581	0	0
Dcaf8	0	0.171557	0	0	0.201859	0.33817	0	0	0	0.0406014	0	0	0.0242598	0	0.00361349
Pea15a	0.0677796	0.52185	0	0	0.231086	0	0.233715	0.617515	0.748989	0	0	0	0	0	0
Casq1	0	0.400789	0	0	0.674218	0	0	0	0	0	0	0.25975	0	0	0.103516
Atp1a4	0	0.612724	0	0	0.035545	0.62357	0	0	0	0	0	0	0	0	0
Igsf8	0	0	0	0	0.00640426	0	0.481392	0.636217	0.607464	0	0	0	0.222172	0	0
Atp1a2	0.392138	0.684356	0	0	0	0.750388	0	0	0	0	0	0	0	0	0.101924
Kcnj9	0	0	0	0	0	0	0.177731	0.443011	0.682398	0	0	0	0.473125	0	0
Kcnj10	0	0	0	0	0	0	0.120822	0.826402	0.340349	0	0	0	0	0	0
Pigm	0	0.0614628	0	0	0.0581702	0	0.0347545	0	0	0.0216086	0	0.0554107	0	0	0
Slamf9	0.863536	0	0	0	0	0	0.219893	0.638369	0.0726679	0	0	0	0.438624	0	0
Igsf9	0.438029	0	0	0	0	0	0	0.288182	0	0	0	0.0173177	0	0	0
Tagln2	0	0.301421	0	0.205738	0.366443	0.364781	0.164212	0.159551	0.330352	0	0	0	0.218147	0	0.238058
Cfap45	0.00927918	0.0175439	0	0	0.135809	0.239198	0	0	0	0	0	0	0.924644	0	0
Vsig8	0	0	0	0	0	0	0	0	0.260617	0.323102	0	0.197774	0.769795	0.101956	0
Slamf8	0	0	0	0	0	0	0.939486	0.307148	0.887836	0	0	0	0	0	0
Dusp23	0	0	0	0	0	0.607532	0	0	0.00321963	0	0	0	0	0	0
Aim2	0.106496	0.305376	0	0.120205	0	0	0.532966	0.50317	0.698814	0	0	0	0.545594	0	0.509539
Ifi206	0.228258	0	0	0	0.0701915	0	0.635236	0	0	0	0	0	0.228065	0	0.595491
Ifi213	0	0	0.646447	0	0	0.280609	0.166557	0	0	0	0	0	0	0	0.418874
Ifi209	0.2139	0	0	0	0	0	0.91809	0.138998	0.337001	0	0	0	0.0720461	0	0.37625
Ifi207	0	0	0	0	0	0	0.627314	0.908119	0.926423	0	0	0	0.50987	0	0
Ifi204	0	0	0	0	0.303384	0.549115	0.632268	0.377912	0.510588	0	0	0	0	0	0
Mndal	0	0	0	0	0	0	0.782113	0.666958	0.0550571	0	0	0	0	0	0.350299
Ifi211	0	0	0	0	0.134851	0.491846	0.80236	0.13564	0	0	0	0	0	0	0
Ifi203	0	0	0	0	0	0.0495606	0.834139	0.578662	0.400019	0	0	0	0	0	0.376086
Ifi202b	0	0	0	0	0.299254	0.163446	0.510541	0.549594	0.647032	0	0	0	0	0	0
Ifi205	0	0	0	0	0.134894	0	0.9165	0.0629297	0	0	0	0	0	0	0
Olfr433	0	0	0	0.173968	0	0	0.776196	0.640245	0.146285	0	0	0	0	0	0
Fmn2	0	0.936244	0	0	0.393667	0.0834967	0	0	0	0	0	0	0	0	0
Grem2	0	0.276513	0.301946	0	0.923176	0.396245	0	0	0	0	0	0	0	0	0
Rgs7	0	0.563678	0	0	0	0.632705	0	0	0	0	0	0	0	0	0
Fh1	0	0.0843028	0	0	0.508324	0.484425	0	0	0	0	0	0	0.394499	0	0
Kmo	0.594577	0	0	0	0	0	0.5799	0.43681	0.0155475	0	0	0	0.147054	0	0.162426
Opn3	0	0.513702	0	0	0.156851	0.0272198	0	0.0615687	0.0720235	0	0	0	0.0398929	0	0
Chml	0	0.521808	0	0	0.179638	0.130706	0.088139	0.0174918	0	0	0	0	0.0411877	0	0
Exo1	0	0	0	0.611466	0.395582	0	0	0	0	0	0	0	0.438916	0	0.407127
Rbm8a2	0	0	0	0	0.139596	0.00299589	0	0	0.0234076	0	0	0	0.0748927	0	0
Cep170	0	0.23316	0	0	0.341368	0.00466865	0	0	0	0	0.499493	0.0164079	0	0	0
Sdccag8	0	0.0603935	0	0	0.167426	0	0	0	0	0	0.0869948	0.0124045	0	0	0
Akt3	0	0	0	0	0.571862	0.366126	0	0	0	0	0.116635	0	0	0	0
Gm26801	0	0	0	0	0.0334971	0.648069	0	0	0	0	0	0	0.110081	0	0
Zbtb18	0	0	0	0	0	0.283237	0.267481	0	0.522946	0	0.0035594	0	0	0	0
Adss	0	0.00761334	0	0	0.225948	0	0.1427	0	0.173489	0	0	0	0.163897	0	0
Catspere2	0	0	0	0	0	0	0	0	0	0.466236	0.303885	0.451405	0	0.352482	0
Desi2	0.0761269	0	0	0	0.291358	0.0722608	0	0	0	0.192452	0.270719	0.286246	0	0.143897	0
B230369F24Rik	0	0	0	0	0.115815	0.277048	0	0	0	0.310714	0.226559	0.101295	0	0.0198171	0
Cox20	0	0.104662	0	0	0.247029	0.221934	0	0	0	0.151152	0	0.00646003	0.226719	0.105802	0.0317853
Hnrnpu	0	0.188323	0	0	0.192945	0.227373	0.0572997	0	0.145213	0.108525	0	0.0030378	0.153391	0.053138	0
Efcab2	0.313062	0	0	0.00910154	0.0898085	0.153333	0	0	0	0	0	0	0.142092	0	0
Kif26b	0	0	0.196693	0	0.837704	0	0	0	0	0	0.126773	0.274213	0	0	0
Smyd3	0	0.00260907	0	0	0.218932	0.0480199	0	0	0.0313261	0	0.00723362	0	0.127038	0	0
Tfb2m	0	0.0905475	0	0	0.261486	0.115889	0	0	0	0.114374	0	0.11939	0.0330946	0	0
Cnst	0.0917848	0	0	0	0.146383	0.176884	0	0	0	0.0738732	0	0.0924117	0	0.342309	0
Sccpdh	0	0	0	0	0.181877	0	0	0	0	0.191443	0.660723	0.485685	0	0.141929	0
Kif28	0	0.304529	0	0	0.122349	0	0	0	0	0	0.516873	0.388765	0	0.147737	0
Ahctf1	0	0.170129	0	0	0.170527	0	0	0	0	0.00445625	0	0	0	0	0.0286403
Cdc42bpa	0	0.296932	0.0956318	0	0.537452	0.28231	0	0	0	0.5621	0.0478836	0.273009	0	0.463472	0
Coq8a	0.449618	0	0	0	0	0.105398	0	0	0	0	0.268997	0	0.805615	0.382715	0
Psen2	0	0	0	0	0.0100851	0.190777	0.100194	0.250344	0.677262	0	0	0	0.17803	0	0.161087
Gm31728	0	0	0	0	0	0	0	0.0576415	0.572799	0	0	0	0	0	0.649508
Itpkb	0	0.102677	0	0	0	0	0.146784	0.643414	0	0.245961	0	0	0	0.544725	0.33006
Parp1	0.20995	0	0	0	0.0542553	0	0	0.167987	0	0.00674067	0	0	0.301761	0	0
Lin9	0	0.113506	0	0.364159	0.195574	0	0.0571939	0	0	0	0	0	0.0810915	0	0.101449
Acbd3	0	0.139264	0	0	0.131245	0	0	0	0	0.345954	0.275799	0.310575	0	0.217084	0
Gm37768	0	0.256107	0	0	0	0	0	0	0	0.360548	0.0131277	0	0	0	0.233796
H3f3a	0.105843	0.00124038	0	0.287955	0.203214	0.225665	0.158592	0.108727	0	0.222677	0.135867	0.194194	0.105778	0.209566	0.197471
Gm17275	0	0	0.194472	0.0388833	0.0128298	0	0	0	0	0.0976848	0	0.105271	0	0	0.0251013
H3f3aos	0	0	0	0.629143	0	0	0	0	0	0.0557271	0.0633803	0	0.0204131	0.15074	0
Sde2	0	0	0	0	0.186805	0.0297885	0.0358527	0	0	0.26242	0	0	0.00114613	0.0314278	0
Pycr2	0.257644	0.0304534	0	0	0.276628	0.0356643	0	0	0	0	0	0.463373	0	0	0
Lefty1	0	0.323364	0	0	0.632942	0.229376	0	0	0	0	0	0.0874117	0	0	0
Tmem63a	0	0	0	0	0.183831	0	0	0	0	0	0.324103	0.145052	0	0	0
Ephx1	0	0	0.132034	0	0.694352	0.313883	0	0	0	0	0.0512476	0.407735	0	0	0
Nvl	0	0.0742087	0	0	0.243387	0.0605274	0	0	0	0.0182301	0	0.105878	0	0	0
Cnih4	0	0.202908	0	0	0.316302	0.184673	0	0	0	0	0	0.152654	0.199857	0.0548445	0
Wdr26	0	0	0	0	0	0.0578004	0.170349	0.0777483	0.0554965	0.100513	0	0	0.15788	0.144767	0
A430110L20Rik	0	0	0	0.0591559	0	0	0	0	0	0.141592	0	0	0.0175312	0.425535	0.233785
Lbr	0	0	0	0.585514	0.147678	0	0.0523256	0	0	0	0	0	0.112703	0	0.344007
Gm5533	0	0	0	0	0.631251	0.0780236	0	0	0	0.112737	0.166973	0.241421	0	0	0
Enah	0	0	0.175716	0	0.607881	0.37792	0	0	0	0.471503	0.540863	0.331022	0	0.463908	0
Srp9	0.236746	0	0	0	0.129247	0	0	0	0	0.26885	0.26195	0.30892	0	0.235289	0
Degs1	0	0.0719418	0	0.217165	0.0856815	0	0.169315	0.168457	0.161259	0	0	0	0.148329	0.00113766	0
1700047M11Rik	0	0.061566	0	0.952087	0	0	0	0	0	0	0	0	0	0	0
Fbxo28	0	0	0	0	0.00661702	0	0	0	0	0.34522	0.180567	0.38981	0	0.537377	0
Trp53bp2	0	0	0	0	0	0	0	0	0	0.593529	0	0.129416	0	0.635735	0
Capn2	0	0.194696	0	0	0.248488	0	0	0	0.0241907	0.050009	0.100901	0.0812348	0	0.248986	0
Capn8	0	0	0	0	0	0	0	0	0	0.258632	0.349716	0.681854	0	0.912314	0
Tlr5	0	0	0	0.00232635	0.479168	0	0	0.0131956	0	0.0268293	0.474661	0.542175	0	0.0564024	0
Gm38079	0	0	0	0	0.386906	0	0	0	0	0	0.185926	0.580372	0	0	0
Disp1	0	0	0	0	0.0118723	0	0	0	0	0.167904	0.391258	0.691005	0	0.00559348	0
Brox	0	0.233981	0	0	0.0625532	0	0.0952196	0.134243	0.291281	0	0	0	0.134296	0	0
Aida	0	0.0909324	0	0	0.555965	0.461721	0	0	0	0	0	0	0	0	0
Mia3	0	0	0	0	0	0	0	0	0	0.440792	0.329869	0.463461	0	0.25511	0
Taf1a	0	0.0592713	0	0	0.190169	0.0822986	0	0	0.0324574	0	0	0.077217	0	0	0
Hhipl2	0	0.254324	0	0	0.252671	0	0	0	0	0.22414	0.297752	0.131827	0	0	0
Dusp10	0	0	0	0	0.0387021	0	0	0	0	0.61736	0.438955	0.415765	0	0	0.0436921
1700056E22Rik	0	0	0	0	0.207832	0.576889	0	0	0	0.0152721	0	0	0	0	0
Gm37800	0	0	0	0.496414	0.444342	0.680956	0.0765086	0	0	0	0	0	0	0	0
Hlx	0	0.111377	0	0.0975161	0.288688	0.454504	0	0.0102291	0.0542116	0	0	0	0	0	0
Gm34342	0	0	0	0.0793453	0.338653	0.404321	0	0	0	0	0	0	0	0	0
2023-03-01	0	0	0.0930405	0	0.682	0.929476	0	0	0	0	0	0	0	0	0
2023-03-02	0.220106	0	0	0	0.290646	0.34608	0	0	0	0.140501	0.0472317	0.141192	0	0.0619075	0
C130074G19Rik	0	0.538465	0.0177139	0	0	0.936568	0	0	0	0	0	0	0	0	0
Mark1	0	0	0.131787	0	0.264354	0.921454	0	0	0	0	0	0	0	0	0
Gm38251	0	0	0	0	0	0.725353	0	0.142253	0	0	0	0	0	0	0
Rab3gap2	0	0	0	0	0.066617	0	0.0577981	0.0795966	0.134994	0.00724703	0.124937	0.0603542	0	0	0
Iars2	0	0.0864414	0	0	0.218463	0.246084	0	0	0	0	0	0	0.172218	0	0
Bpnt1	0	0.0176219	0	0	0.14783	0	0	0	0	0.150628	0	0.343233	0.0485196	0.00369738	0
4930532G15Rik	0.0175089	0	0.0169052	0	0.350434	0	0	0	0	0	0.421352	0.324786	0	0.0058072	0
Eprs	0.0962437	0	0	0	0.179892	0	0	0	0	0.350621	0.343714	0.345865	0	0.254601	0
Slc30a10	0	0.0709256	0	0	0	0	0	0	0	0	0.6209	0.591877	0	0	0
Lyplal1	0	0	0	0	0.212473	0	0	0	0	0.361684	0.541174	0.441618	0	0.586464	0
Tgfb2	0	0.368816	0.0982231	0	0.604457	0.129221	0	0	0	0.121091	0	0.024354	0	0.720623	0
Rrp15	0	0.0555175	0	0	0.507826	0.163486	0	0	0	0	0	0.0123741	0	0	0
A430105J06Rik	0	0	0	0.670937	0	0.156271	0	0	0	0	0	0	0	0.0789641	0
Gpatch2	0	0.0232678	0	0	0.0924043	0.301514	0	0	0	0	0	0	0.0584527	0	0
Gm37896	0	0	0	0	0	0	0	0	0	0.238047	0.418892	0.744975	0	0.065694	0
Kctd3	0	0	0	0	0.0578723	0.0369752	0	0	0	0.287483	0.259245	0.277659	0	0.0372108	0
Kcnk2	0	0	0.144867	0	0.554577	0.861637	0	0	0	0.159144	0	0	0	0	0
A430027H14Rik	0	0	0.389467	0	0.500697	0.788231	0	0	0	0	0	0	0	0	0
Cenpf	0	0	0	0.686882	0.530781	0	0	0	0	0	0	0	0.279467	0	0.461018
Ptpn14	0	0	0.101802	0	0.69642	0.152222	0	0	0	0.365037	0.300009	0.604782	0	0	0
Gm37422	0	0	0.0802073	0	0.46293	0.0101278	0	0	0	0.644126	0.386214	0.395339	0	0	0
Smyd2	0	0.204117	0	0	0.526995	0.0969945	0	0	0	0.0223713	0.23925	0.176161	0	0	0
Prox1	0	0.48812	0	0	0.00902128	0.117097	0	0	0	0.384573	0	0.102633	0	0	0
Rps6kc1	0	0	0	0	0.076617	0	0	0.0564648	0.105378	0	0	0.156841	0	0	0
Angel2	0	0	0	0	0.0392766	0.0194465	0	0	0	0.146244	0.119593	0.172662	0.0295606	0.00990709	0
Vash2	0	0	0.024926	0	0.484928	0.212103	0	0	0	0	0	0.367048	0	0	0
Flvcr1	0	0	0	0	0	0	0.11455	0.284851	0.906442	0	0	0	0.411848	0	0
Tatdn3	0	0.0329341	0	0	0.243243	0.462357	0	0	0	0	0	0.0403373	0	0	0
Nsl1	0	0	0	0.599004	0.351577	0	0	0	0	0	0	0	0.140882	0	0.436678
Batf3	0	0	0	0	0	0	0.470722	0	0	0	0.626329	0	0	0.662625	0.432703
Fam71a	0	0	0	0	0	0	0	0	0	0.84412	0.57054	0.402836	0	0.604508	0
Atf3	0	0.22574	0	0	0	0	0.0582041	0.277806	0.429152	0.500589	0.235344	0.0333596	0	0.46346	0
D730003I15Rik	0.104542	0	0	0.25739	0	0.0109564	0.0392765	0	0	0	0.0349051	0	0.0416065	0	0
Gm37168	0	0.636365	0	0	0	0	0.0136456	0.346465	0.00732312	0.0950853	0	0	0	0	0
Nenf	0	0.0456801	0.0451629	0	0.345571	0.327765	0	0	0	0.257817	0.324506	0.375089	0	0.201555	0
Tmem206	0	0.397815	0	0	0	0	0	0.321344	0.575392	0	0.0808711	0.0516196	0.537493	0	0
Ppp2r5a	0.134307	0.034645	0	0.244302	0	0	0.051615	0	0	0.27523	0.399566	0.0923057	0	0.393044	0
Gm32200	0	0	0.180281	0	0	0	0	0	0	0.758591	0	0.284359	0	0.740139	0
Dtl	0	0	0	0.54199	0.4719	0	0	0	0	0	0	0	0.0160458	0	0.506238
Ints7	0	0.0330624	0	0	0.136723	0.0531557	0.0289406	0.00930851	0.120354	0	0	0	0.095127	0	0
Lpgat1	0	0	0	0	0.381954	0.600517	0	0	0	0	0	0	0	0	0
Gm38037	0	0	0	0.580289	0.613486	0	0	0	0	0	0	0	0	0	0.0544705
Nek2	0	0	0	0.300487	0.512294	0	0.00594315	0	0	0	0	0	0.523335	0	0.203083
1700034H15Rik	0	0	0	0	0	0	0.588305	0.326507	0.421509	0	0	0	0.432957	0	0
Slc30a1	0	0	0	0	0	0	0.718599	0.361116	0.67279	0	0	0	0.622665	0	0
Gm26670	0	0	0	0	0.0393404	0.120635	0	0	0	0	0.0274801	0.0587165	0	0.128416	0
Traf5	0	0	0	0	0.168936	0	0.537492	0	0	0.258434	0	0	0.210315	0	0
Gm26879	0	0.0108837	0.657291	0	0.144149	0.158876	0	0	0	0	0	0	0.0611591	0	0
Rcor3	0	0.0775877	0	0	0.361136	0.389019	0	0	0	0	0	0	0	0.00639932	0
Gm10516	0	0	0	0	0.412382	0.323231	0	0	0	0	0	0.00749108	0	0.613355	0
Kcnh1	0	0	0.0810711	0	0.821806	0.13707	0	0	0	0.122425	0.231068	0.540007	0	0	0
Hhat	0	0	0	0	0.42202	0.00408063	0	0	0	0.373102	0.148413	0.33115	0	0	0
Sertad4	0	0	0.048001	0	0.692315	0	0	0	0	0.360443	0.022933	0	0	0.920842	0
Gm15867	0	0	0.0240622	0	0.625203	0	0	0	0	0	0	0	0	0.961023	0
Diexf	0	0	0	0	0.164383	0.00738987	0	0	0.0781413	0	0	0.0501031	0.0436485	0	0
A130010J15Rik	0.352312	0	0	0	0.190106	0.192539	0	0	0	0	0	0	0	0	0
Traf3ip3	0.540004	0	0	0.864134	0	0	0.0520553	0	0	0	0	0	0	0	0.695245
Lamb3	0	0	0	0.801942	0	0	0	0	0	0	0	0	0	0.72774	0.365328
Hsd11b1	0.569381	0	0	0.903877	0	0.419002	0	0	0	0	0	0	0	0	0.239731
G0s2	0	0	0	0.877493	0	0.804008	0	0	0	0	0	0	0	0	0
Camk1g	0	0	0	0	0.581418	0.721514	0	0	0	0	0.0927835	0	0	0	0
Plxna2	0	0.455469	0	0	0.0869362	0.828614	0	0	0	0	0	0	0.420855	0	0
Cd34	0	0.766704	0	0	0	0.164774	0.018531	0	0	0	0	0	0.142026	0	0.701338
Gm16897	0	0	0	0	0	0.118003	0	0.488211	0.226438	0	0	0	0	0	0.39083
Cd46	0	0.200954	0	0	0	0.364406	0	0	0	0	0	0	0	0	0
Cr1l	0.143907	0.116125	0	0	0.037766	0.143209	0	0	0	0.0701746	0	0.0934786	0.122159	0.0858931	0
Fam171a1	0	0.0609495	0	0	0	0	0	0	0	0.549118	0.805855	0.777233	0	0.293144	0
Nmt2	0	0.0796407	0	0	0.0331915	0	0	0	0.108281	0.167047	0.213568	0.100112	0	0	0
Rpp38	0	0	0	0	0.495284	0.319384	0	0	0	0	0	0	0	0	0
Acbd7	0	0	0	0	0	0.051672	0	0	0	0	0.151141	0.0141939	0	0	0.593995
Meig1	0	0	0	0	0	0.245357	0.0416105	0.129968	0.650938	0	0	0	0.556821	0	0
Dclre1c	0	0	0	0.310455	0	0	0.415194	0.337411	0.471459	0	0	0	0.303638	0	0.136056
Suv39h2	0	0	0	0	0.361012	0	0	0	0	0	0	0	0.264471	0	0.0758927
Hspa14	0	0	0	0.00325651	0.29753	0.275131	0	0	0	0	0	0	0.0903056	0	0.0958526
Gm45902	0	0	0	0	0.0887021	0.145458	0	0	0	0	0	0	0	0	0.124435
Cdnf	0	0	0	0	0.284274	0.111493	0	0	0	0.00115176	0	0	0	0.22203	0
Fam107b	0.509965	0.0521814	0	0.556448	0	0	0.267508	0.141654	0.461969	0	0	0	0.407209	0	0.595304
Frmd4a	0	0.493386	0	0	0.243566	0.293575	0.0547158	0	0	0	0	0.0793097	0.352206	0	0
Prpf18	0	0	0	0	0	0	0.0307494	0	0.111763	0.173373	0	0	0.116258	0.0329446	0.096571
Bend7	0	0.75475	0	0	0	0	0	0	0	0.823843	0.0378138	0.0578673	0	0.269113	0.0284222
Sephs1	0	0	0	0	0.326601	0.384549	0	0	0	0	0	0.0792187	0	0	0
Phyh	0	0	0	0	0.123936	0.471195	0	0	0	0	0	0	0.429963	0	0
Mcm10	0	0	0	0.194723	0.303514	0	0	0	0	0	0	0	0	0	0.246207
Optn	0	0	0	0.225741	0.13882	0.141387	0.0904517	0	0	0	0	0	0	0	0
4930551O13Rik	0.311285	0	0	0.54336	0	0	0.0229111	0.0576253	0	0	0	0	0.0346622	0	0
Ccdc3	0	0	0.305623	0	0.726986	0.237505	0	0	0	0	0	0.0929845	0	0	0
Camk1d	0	0	0	0	0.0375532	0	0.473168	0.812575	0.243029	0	0	0	0.0663984	0	0
Cdc123	0	0	0	0	0.23648	0.145715	0	0	0	0.219738	0	0.417259	0	0.18067	0
Nudt5	0	0.019846	0	0	0.354643	0.0776992	0	0	0	0.0561307	0.200991	0.32309	0	0	0
Gm13199	0	0	0	0	0.11915	0.236382	0	0	0.0615211	0.146473	0	0	0.133546	0	0
Sec61a2	0	0	0	0	0.367294	0.259265	0	0	0	0.0613156	0.107832	0.0267196	0	0	0
Dhtkd1	0	0	0.169916	0	0.407585	0.603806	0	0	0	0	0	0	0	0	0
Upf2	0	0.065911	0	0	0.163516	0.234809	0	0	0	0	0	0	0	0.177674	0
Proser2	0.0906506	0	0	0	0.0892553	0	0	0	0	0	0.722513	0.168476	0.642638	0.206419	0
Echdc3	0	0	0	0	0.215585	0.382928	0	0	0	0.0825491	0.0957799	0.113687	0	0.12713	0
Gm13383	0.538087	0.51328	0	0	0	0	0	0	0	0.183387	0.0798377	0.188372	0	0.156712	0
Usp6nl	0.00066778	0.271542	0	0	0	0.134395	0	0	0	0.304939	0	0.128139	0.456076	0	0
Gm13391	0	0	0	0	0	0	0.482231	0.702285	0.905164	0	0	0	0.0753282	0	0
Celf2	0.247096	0.393876	0	0.466168	0	0	0.459282	0.479352	0.259095	0	0	0	0.124118	0	0.524753
Gm28641	0	0	0	0	0	0	0	0	0	0.774472	0	0.0114748	0	0.559596	0
Gata3	0	0	0	0	0	0	0.0123821	0	0	0	0	0	0	0	0.879543
Taf3	0.0145242	0.0423011	0	0	0.101362	0.186008	0	0	0.0315603	0	0	0	0	0	0.132286
Atp5c1	0.0479967	0.0838751	0	0	0.2655	0.216025	0	0	0	0.162901	0.156994	0.154365	0.220678	0.12263	0
Kin	0	0.130624	0	0.0915423	0.150136	0.282481	0	0	0	0	0	0	0	0	0.228828
Itih2	0	0.128317	0	0	0.155675	0.832132	0	0	0	0	0	0	0	0	0
Itih5	0	0	0.0735439	0.0619807	0	0.918533	0	0	0	0	0	0	0	0	0
Sfmbt2	0	0	0	0	0	0	0	0	0	0	0.880025	0.168889	0	0.303526	0
Prkcq	0	0.222446	0	0	0	0	0	0	0	0	0	0	0	0	0.917496
Pfkfb3	0	0	0	0	0	0	0	0.00225041	0.0784024	0	0.682918	0.0613854	0	0	0
Rbm17	0	0.120402	0	0	0.300137	0	0	0	0	0	0.0344603	0.00776416	0	0	0
Il2ra	0	0	0	0	0	0	0	0	0	0	0	0	0	0	0.927667
Il15ra	0	0	0	0	0	0	0.76079	0.0520206	0	0	0	0	0.000560359	0.0933404	0.00936831
Fbxo18	0	0	0	0	0.120881	0.373367	0	0	0	0	0.0458878	0.146985	0	0	0
Ankrd16	0	0	0	0	0.0721277	0.148234	0	0	0	0	0.0901332	0.0369708	0	0.0476676	0
Itga8	0	0	0	0	0	0.876882	0	0	0	0	0	0	0.253873	0	0
Mindy3	0	0.118777	0	0.15735	0.124553	0.0965711	0.0967054	0	0	0	0	0.0538942	0	0	0.0148555
Pter	0	0.0875535	0	0	0.453251	0	0	0	0	0.0248106	0	0.481783	0.523176	0	0
C1ql3	0	0.545585	0	0	0.58789	0	0	0	0	0	0.206976	0.122891	0	0	0
Rsu1	0	0.199743	0	0	0.373838	0.435449	0	0	0	0	0	0	0.106113	0	0
Cubn	0.125526	0.336566	0	0	0.305055	0.063142	0	0	0	0	0	0	0.319754	0	0
Trdmt1	0	0.0209581	0	0	0.199766	0.349242	0	0	0	0	0	0	0.396314	0	0
Vim	0	0.215013	0.262761	0	0.245179	0.132086	0.198256	0.202387	0.23484	0	0.102416	0.0855648	0	0	0
St8sia6	0.812304	0.618234	0	0	0	0	0	0	0	0	0	0	0.689825	0	0.344459
Hacd1	0	0	0.0293682	0	0.450937	0.318291	0	0	0	0.518795	0.572067	0.541757	0	0.469724	0
Stam	0	0.186667	0	0	0.432252	0.0410561	0	0	0.301069	0	0	0	0.0207736	0	0
Tmem236	0	0.100951	0	0	0.149191	0	0	0	0.071528	0	0	0	0.521056	0	0
Mrc1	0	0	0	0	0	0	0.84726	0.93542	0.0663805	0	0	0	0	0	0
Slc39a12	0.0407167	0	0	0	0	0	0.758575	0.673899	0	0	0	0	0	0	0
Cacnb2	0	0	0	0.0433352	0.235333	0	0	0	0	0	0	0.0123135	0.759049	0	0.327236
Nsun6	0	0.060308	0	0	0.112426	0.0774652	0	0	0	0	0.128445	0	0	0	0
Arl5b	0	0	0	0	0	0	0	0	0	0.299973	0.241001	0.214209	0	0.389719	0
Malrd1	0	0	0.324747	0	0	0.91821	0	0	0	0	0	0	0	0	0
Plxdc2	0	0	0.105257	0	0.655928	0.871548	0	0	0	0	0	0	0	0	0.046224
Nebl	0	0.245812	0	0	0	0	0	0	0	0.621893	0.300902	0.701398	0	0.601005	0.234985
A930004D18Rik	0	0.0695171	0.05923	0	0.468102	0.603702	0	0	0	0	0	0.0839234	0	0.160125	0
Skida1	0	0	0	0	0.217251	0.616321	0	0	0	0	0	0.298607	0	0.195486	0.0304543
Mllt10	0	0.0411035	0	0	0.139759	0.231531	0	0	0	0	0.240783	0	0	0.118847	0
Dnajc1	0	0	0	0	0.157776	0.0677574	0	0	0	0.430537	0.440671	0.496511	0	0.336392	0
Commd3	0	0	0	0	0.309382	0.278382	0	0	0	0.222693	0.218422	0.262243	0	0.257418	0
Bmi1	0	0.140547	0	0	0.227931	0.335404	0	0	0	0.0228214	0	0.0505884	0	0.159714	0
Spag6	0.841073	0	0.409082	0	0.0477447	0	0	0	0	0	0	0	0	0	0
Carlr	0	0	0	0	0	0	0.395456	0.298868	0.765132	0	0	0	0	0	0
Pip4k2a	0	0	0	0	0	0	0.343735	0.639367	0.662698	0	0	0	0.588694	0	0.0709315
4930426L09Rik	0	0	0	0	0.400651	0.254047	0	0	0	0	0	0	0.127237	0	0.351847
Armc3	0	0	0	0.827736	0	0	0.34149	0.680249	0.374632	0	0	0	0	0	0.0412481
Msrb2	0	0	0	0.386668	0.141957	0.157169	0	0	0	0	0	0.0701504	0	0.295467	0
Otud1	0	0.275958	0	0	0.00744681	0	0	0	0.0415942	0.381964	0	0.0451292	0	0.420714	0
Etl4	0.198861	0	0	0	0.162656	0	0	0	0	0.783873	0.351271	0.607703	0	0	0
Arhgap21	0	0.164874	0	0	0.0864043	0.306645	0	0	0	0.103415	0	0.0167415	0.110172	0	0
Gm13375	0.133274	0.46546	0	0	0	0.174275	0	0	0	0	0	0	0	0	0
Enkur	0	0	0	0.70951	0	0	0.0128032	0	0	0	0	0.0646306	0	0	0.434483
Thnsl1	0	0.0169376	0	0	0.0413404	0	0	0	0.0229725	0	0.0457364	0.169837	0	0.286651	0
Gad2	0	0.919974	0	0	0	0	0	0	0	0	0	0.0282361	0	0	0.24837
Apbb1ip	0	0	0	0.56493	0	0.258935	0.566801	0.601343	0.264859	0	0	0	0.39644	0	0.290073
Pdss1	0	0	0	0	0.345223	0.058263	0	0	0	0	0	0	0.327248	0	0
Abi1	0	0.0122754	0	0	0	0	0.361252	0.406205	0.290902	0	0	0	0.264283	0	0
Acbd5	0.0686978	0.131052	0	0	0.0615319	0.169779	0	0	0	0.0435722	0	0.0316936	0	0.100628	0
Mastl	0	0	0	0.229835	0.552139	0	0	0	0	0	0	0	0.0530923	0	0.335386
Yme1l1	0	0	0	0	0.121693	0.0786234	0	0	0	0.253194	0.217349	0.293029	0	0.192735	0
4931423N10Rik	0.157109	0	0	0	0.192303	0	0	0	0	0.15624	0.436196	0.0906232	0	0	0
Nxph2	0	0	0	0	0.383555	0.73674	0	0	0	0	0.0484858	0	0	0	0
Spopl	0	0.0546621	0	0	0.136617	0.263289	0	0	0	0	0.0199786	0	0	0	0
Hnmt	0	0	0	0.164618	0.196777	0.764721	0	0.0011252	0	0	0	0	0.491265	0	0
Il1f9	0	0	0	0.949049	0	0	0.553733	0	0	0	0	0	0	0	0
Gm13411	0	0	0.191387	0	0.565318	0.875528	0	0	0	0	0	0	0	0	0
Il1rn	0	0	0.115375	0.202489	0	0.692335	0.441145	0.390587	0.0358448	0	0	0	0	0	0
Psd4	0	0	0	0.0914024	0.142511	0.625425	0	0.0699673	0.281978	0	0	0	0.0327125	0	0
Pax8	0	0	0	0.532009	0.0507021	0.674501	0.0887605	0	0	0	0	0	0	0	0
Cacna1b	0	0	0	0	0.485786	0.5226	0.725936	0	0	0	0	0	0	0	0
Ehmt1	0	0.0938409	0	0	0.233064	0.362112	0	0	0	0	0	0.044189	0	0	0
Arrdc1	0	0	0	0.114606	0	0.0124971	0.102646	0.13276	0.355345	0	0	0	0.145156	0	0.0649922
Zmynd19	0	0	0	0	0.227617	0	0	0	0	0.201232	0.115389	0.544016	0	0	0
Dph7	0.000775709	0	0	0	0.224587	0.27103	0	0	0	0	0	0.152287	0	0	0
Mrpl41	0	0	0	0	0.237988	0.3837	0	0	0	0.076852	0	0.12621	0.251038	0.011187	0
Pnpla7	0	0	0	0.474569	0	0	0.394068	0.376434	0.585745	0	0	0	0.531027	0	0.106799
Nsmf	0	0	0	0	0.375796	0.300671	0	0	0	0	0.0144325	0.102439	0	0	0
Nrarp	0	0.665924	0	0.367281	0	0	0	0	0	0.38334	0	0.134114	0	0.205191	0.552454
Gm38287	0	0.593212	0	0	0.0111702	0	0	0	0	0.0909017	0.225976	0.27129	0	0	0
Tor4a	0	0.11029	0	0.0354979	0.18717	0	0	0	0.546072	0	0	0	0.4938	0	0
Nelfb	0	0.157143	0	0	0.270541	0.0765215	0	0	0	0	0.200937	0.0444923	0	0	0
Stpg3	0	0	0.127468	0.266102	0.269736	0	0	0	0	0	0	0.503862	0	0.245853	0.0364583
Tubb4b	0.169115	0.0763473	0	0.158423	0.318594	0.0652785	0	0	0	0.15811	0	0.170892	0	0.334559	0.0190043
Rnf208	0	0	0	0	0	0	0	0	0	0	0.925658	0	0	0.053644	0
Ndor1	0	0	0	0	0.0546809	0	0	0.060045	0.216795	0	0.0290876	0.074912	0	0	0
Tmem203	0.00742905	0	0	0	0	0	0	0	0	0.3742	0.36805	0.327568	0	0.463792	0
Tprn	0	0.0576559	0	0	0.0716809	0	0	0	0.264289	0	0	0.0627199	0.318507	0	0
Ssna1	0	0.0932421	0	0	0.308917	0.139675	0	0	0	0	0.00406751	0.254963	0.133763	0.194692	0
Anapc2	0	0.163345	0	0	0.226602	0.0133449	0	0	0.0692691	0	0	0.101164	0	0.0311907	0
Grin1	0	0	0.146718	0	0.463922	0	0	0	0	0	0.0823752	0.70976	0	0	0
AA543186	0	0.0584507	0	0	0.0806362	0.356972	0	0	0	0	0	0.0650968	0	0	0
Man1b1	0.333748	0	0	0	0.0384043	0	0	0	0	0	0.158617	0.108936	0.0145177	0.0432783	0
Dpp7	0	0	0	0	0.0043617	0	0.223641	0.207402	0.585423	0.0954414	0	0	0.266891	0	0
Uap1l1	0	0	0	0	0.0456596	0	0.319002	0.520549	0.928227	0	0	0	0.595875	0	0
Sapcd2	0.243641	0	0	0.144341	0.480046	0	0	0	0	0	0	0	0.322859	0	0.401192
Entpd2	0	0.734003	0	0	0.207021	0.530189	0	0	0	0	0	0	0	0	0
Npdc1	0	0.281393	0	0	0.517539	0.414367	0	0	0	0.409471	0.45148	0.620594	0	0.334271	0
Fut7	0	0	0	0.585477	0	0	0.0849899	0.0847495	0.0620775	0	0	0	0.510017	0	0.7346
Abca2	0	0.046621	0	0	0	0	0	0	0	0.226676	0.122627	0.147731	0.201935	0.202247	0.419651
Paxx	0	0	0	0	0.0545319	0.0264707	0	0	0	0.0686548	0.214727	0.355489	0	0.216456	0
Clic3	0	0	0	0	0	0	0	0	0	0	0.588099	0.73677	0	0.13538	0
C8g	0	0	0	0	0	0.489799	0	0	0	0.0579826	0	0	0	0.00587979	0
Fbxw5	0	0	0	0	0.0957872	0.33771	0	0	0	0	0	0.152231	0	0	0
Traf2	0	0.311376	0	0	0.227362	0.0614586	0.0295866	0	0.328811	0	0	0	0	0	0.0121119
Edf1	0.0983306	0.207314	0	0	0.239304	0.221382	0	0	0	0.16101	0.0882103	0.266394	0	0.182736	0
Mamdc4	0	0	0.152887	0	0	0.264836	0	0	0	0.0504277	0.506137	0	0	0	0
Phpt1	0	0	0	0	0.175275	0.258174	0	0	0	0.326191	0.300691	0.383183	0	0.0911547	0
Gm996	0.315814	0.254371	0	0	0.0300213	0.13453	0	0	0	0	0	0.0497695	0	0	0
Rabl6	0	0	0	0	0.139011	0	0	0	0	0.198079	0.327026	0.310032	0	0.0994975	0
Fcnaos	0	0.216764	0.558083	0	0	0	0	0	0	0.393383	0	0.224562	0	0	0
Tmem141	0	0	0	0	0	0	0.0857858	0.300252	0.148192	0	0.00956828	0	0.377168	0	0
Fcna	0	0	0	0	0	0	0.802761	0.898909	0	0	0	0	0.604631	0	0
A230005M16Rik	0.0534131	0	0	0	0	0	0	0	0	0.493098	0.674232	0.390715	0	0.330161	0
Bmyc	0	0	0	0	0.363873	0.214794	0	0	0	0	0.540015	0.427431	0	0	0
Obp2b	0	0	0	0	0	0	0	0	0	0.308936	0.702904	0.737623	0	0	0
Kcnt1	0	0	0	0	0.0599822	0.889941	0	0	0	0	0	0	0	0	0
Camsap1	0	0.00855432	0	0	0.359325	0	0	0	0	0	0.150024	0.044371	0	0	0
Ubac1	0	0	0	0	0.445294	0.145305	0	0	0	0	0	0.0677545	0.422484	0	0
Nacc2	0	0.0144996	0	0	0.370243	0.471994	0	0.0279255	0	0	0	0	0	0	0
Tmem250-ps	0	0.101925	0	0	0.363046	0.214634	0	0	0	0	0	0.0959299	0	0	0
Qsox2	0	0.0591531	0	0	0.212799	0.145484	0	0	0	0	0	0.395444	0	0	0
Gpsm1	0	0	0	0	0.0595917	0.0317601	0	0	0	0.334313	0.810726	0.489746	0	0	0
Dnlz	0	0	0	0	0.445249	0.410087	0	0	0	0.0890799	0	0.359976	0	0.0936196	0
Card9	0	0	0	0.6003	0	0	0.449524	0.546538	0.545955	0	0	0	0.590616	0	0
Snapc4	0	0	0	0	0.121383	0	0	0	0.374338	0	0.03391	0	0	0	0
Sdccag3	0	0.121728	0	0	0.0411915	0.0160183	0.0187339	0	0	0	0	0.0634781	0	0.00331816	0
Pmpca	0	0	0	0	0.221739	0	0	0	0	0	0	0.204742	0.0684336	0.00293895	0
Inpp5e	0	0	0	0	0.243549	0.456109	0	0	0	0	0	0	0	0	0
Sec16a	0	0	0	0	0	0	0	0	0	0.426653	0.447133	0.516542	0	0.280526	0
Notch1	0	0.356796	0	0.424747	0	0	0.423067	0.669012	0	0	0	0	0	0	0
Egfl7	0	0.71591	0	0.0553607	0.332986	0.354475	0	0	0	0	0	0	0	0	0.0874599
Agpat2	0	0	0	0.556873	0.184246	0.408921	0	0	0	0	0	0	0	0	0
Fam69b	0	0	0.071693	0	0.934229	0.518936	0	0	0	0	0	0.0335315	0	0	0
Surf6	0	0	0	0	0.170191	0.00256791	0	0	0.0390893	0	0	0.0868313	0.132287	0	0
Med22	0	0.108512	0	0	0.129383	0.340529	0	0	0	0	0	0	0	0.0184869	0
Rpl7a	0.192237	0.0590248	0.0842794	0	0.237787	0.150884	0.137274	0.0499036	0	0.19738	0.217642	0.203364	0	0.123815	0.187032
Surf1	0.134852	0	0	0	0.197119	0.313568	0	0	0	0	0	0.150322	0.030277	0	0
Surf2	0	0.14263	0	0	0.495151	0.452758	0	0	0	0	0	0	0.104489	0	0
Surf4	0	0	0	0	0.128696	0	0	0	0	0.315103	0.319664	0.402186	0	0.263471	0
Rexo4	0	0.0414885	0	0	0.186238	0.0325839	0	0	0.341213	0	0	0.150382	0	0	0
Cacfd1	0	0	0	0	0.0367872	0	0	0	0	0.246914	0.506633	0.481937	0	0.296481	0
Slc2a6	0.284166	0	0	0.323929	0	0	0.842376	0.700738	0.0847338	0	0	0	0	0	0.19714
Adamtsl2	0	0	0	0	0	0	0	0	0	0	0.415544	0	0	0.950967	0
Sardh	0	0	0	0	0.406852	0.44844	0	0	0	0.366153	0.0527764	0.837505	0	0	0
Vav2	0	0	0	0	0	0	0	0	0	0.519238	0.162447	0.771554	0	0.567732	0
Brd3os	0	0	0	0	0.354761	0.0830875	0	0	0	0	0.671292	0.514933	0	0.0211237	0
Brd3	0	0.183234	0	0.022765	0.304439	0.328539	0	0	0	0	0	0.120365	0	0	0
Wdr5	0	0.142387	0	0.0689449	0.172404	0	0	0	0.053694	0	0	0	0.0722541	0	0
Rxra	0	0	0	0	0.046617	0.442621	0.156653	0.164756	0.109328	0	0	0	0	0	0
Col5a1	0	0	0.203973	0	0.332142	0	0	0	0	0.516252	0.608781	0.594466	0	0.491506	0
Olfm1	0	0.178215	0	0	0.347873	0.559784	0.500214	0	0	0	0	0	0.56065	0	0
Ppp1r26	0	0	0.118583	0	0.407086	0.496697	0	0	0	0	0	0.151237	0	0	0
1700007K13Rik	0	0	0.134625	0	0.783678	0.25804	0	0	0	0	0	0	0	0.0171312	0
Mrps2	0	0	0	0	0.168213	0.00676215	0	0	0	0	0	0.13654	0.306027	0	0
Gbgt1	0	0	0	0	0	0.224051	0.564153	0.384111	0	0.12951	0	0	0	0.043917	0
Ralgds	0	0	0	0.120081	0	0	0.670046	0.597045	0.166248	0.265927	0	0	0	0	0
Gtf3c5	0	0.0174936	0	0	0.149149	0	0	0	0.179084	0	0	0.0298435	0	0	0
Tsc1	0	0	0	0	0.0747872	0	0.0142119	0	0	0	0	0	0.10765	0	0
Spaca9	0.104757	0	0	0.389826	0.0195957	0	0.728327	0	0.0182515	0	0	0	0	0	0
Ak8	0.241692	0	0	0	0	0.126255	0.743588	0	0.14299	0	0	0	0	0	0
Gtf3c4	0	0	0	0	0.155936	0	0	0	0.0752698	0	0	0.225178	0	0	0
Ddx31	0	0	0	0	0.159447	0	0	0.0588175	0.74188	0	0	0	0.108704	0	0
Cfap77	0	0.0270624	0	0	0.0571064	0.183799	0.626044	0.0302782	0.213624	0	0	0	0	0	0
Ttf1	0	0	0	0	0.130319	0.197425	0	0	0.0726824	0	0	0	0.0508118	0	0
Setx	0	0.0709153	0	0	0.0813617	0.211325	0	0	0	0	0	0.0373347	0	0	0.021614
Ntng2	0	0	0	0.782034	0	0	0	0	0	0.0278635	0.0438993	0	0	0	0
Med27	0	0	0	0	0.267179	0.00536407	0	0	0	0	0	0.398808	0	0	0
Rapgef1	0.0795492	0.351029	0	0	0.0889149	0	0.0254522	0	0.0786348	0	0	0	0.391621	0	0
Trub2	0	0.237003	0	0.0773039	0.0900851	0.0587765	0	0	0.183524	0	0	0.0967791	0	0	0
Coq4	0	0.00988024	0	0.191129	0.172142	0.0974838	0	0	0	0	0.00195193	0.0470702	0	0	0
Slc27a4	0	0.0775021	0	0.481651	0.00778723	0	0	0	0	0	0.438737	0	0	0	0
Urm1	0	0.126775	0	0	0.267325	0.163935	0	0	0.0109641	0	0	0.169428	0.129752	0	0
2600006K01Rik	0	0	0	0	0	0	0	0	0	0.724163	0.371025	0.791505	0	0.574483	0
Cercam	0	0	0.181515	0	0	0	0	0	0	0.599249	0.778719	0.662484	0	0.556203	0
Odf2	0	0	0	0.21623	0.10666	0	0	0	0	0	0.148467	0.0557139	0	0	0.00675857
Gle1	0.232408	0.029213	0	0	0.0430213	0	0	0	0	0.145659	0.157951	0.329948	0.00792741	0	0
Sptan1	0	0.272049	0	0	0.0297447	0.227468	0	0	0	0.23866	0	0.207432	0	0.217142	0
Wdr34	0	0	0	0	0.443392	0.183522	0	0	0	0	0	0	0.0399713	0	0
Set	0.0318865	0.21621	0	0	0.307048	0.199957	0	0	0.0657801	0	0	0.035216	0.20788	0	0
Pkn3	0	0.606512	0	0	0.22066	0	0.112552	0.0668845	0	0	0	0	0.883966	0	0
Zdhhc12	0	0	0	0	0.073234	0	0	0	0	0.329028	0.511793	0.461234	0	0.451995	0
Zer1	0.00759599	0.00765612	0	0	0.103426	0.189413	0	0	0	0.0193745	0.0236145	0.0678758	0	0.164013	0.146939
Tbc1d13	0	0	0	0	0	0	0.0861931	0.29484	0.288272	0	0	0.0513163	0.0291309	0	0
Endog	0	0	0	0	0.0261064	0	0	0	0	0.170525	0.656974	0.515513	0.122302	0.145132	0
Spout1	0	0	0	0	0.428226	0.110668	0	0	0	0	0	0.402236	0	0	0
Kyat1	0	0	0	0	0.000957447	0.183557	0	0	0	0.10532	0.0437462	0.146427	0	0	0
1700084E18Rik	0	0	0	0.000249252	0	0	0	0	0	0.128624	0.338085	0.0384872	0	0.484562	0
Lrrc8a	0	0.279076	0	0	0.0487021	0.160944	0	0	0	0.0410459	0.122627	0	0	0.250552	0
Phyhd1	0.229623	0	0	0	0.0821064	0.110677	0.353283	0.0356209	0	0	0	0	0.386495	0	0.0499587
Dolk	0.0244718	0	0	0	0.0793191	0.0863642	0	0	0	0.224779	0.0391534	0.223378	0	0.238653	0
Nup188	0	0	0	0	0.213268	0.00393746	0	0	0	0	0.00631506	0	0.119714	0	0
Sh3glb2	0	0.0380667	0	0	0.00674468	0.335086	0	0	0	0.160908	0.0332118	0.364426	0.0475167	0.383904	0
Miga2	0	0	0	0	0.275833	0.620694	0	0	0	0	0	0.028509	0	0	0
Dolpp1	0	0	0	0	0.0863617	0.300012	0	0	0	0	0.019902	0.230401	0	0.0276513	0
Crat	0	0	0	0	0	0.134077	0.0293928	0.00173895	0	0.027857	0	0.0694529	0.143607	0.0992142	0
Ptpa	0	0.0350299	0	0	0.225972	0.0856464	0	0	0.0411348	0	0	0.0255096	0.0724928	0	0
Ier5l	0	0.040077	0	0	0.479849	0.428249	0	0	0	0	0.327999	0	0	0.697171	0
Cstad	0	0	0	0	0.6128	0.664194	0	0	0	0	0	0	0	0	0.121745
9330198N18Rik	0	0	0	0	0	0	0.626335	0.73263	0.342313	0	0	0	0	0	0
1700001O22Rik	0	0	0	0	0.0706638	0.226282	0	0	0	0	0.741979	0.095198	0	0.0387631	0
Ntmt1	0	0.0646279	0	0	0.476416	0.00768468	0	0	0	0	0.263324	0.364853	0	0	0
Asb6	0	0.141958	0	0	0.18134	0.0195161	0	0	0.69517	0	0	0	0	0	0
Prrx2	0	0	0.26657	0	0.908691	0	0	0	0	0	0.273948	0	0	0.197582	0
Ptges	0	0	0.0535538	0	0.788672	0	0	0	0	0	0.0517368	0	0	0	0
Tor1b	0	0	0	0	0.175057	0.13688	0	0	0	0.1451	0.0265615	0.185927	0	0.176143	0
Tor1a	0	0	0	0.0181527	0.11025	0.0149149	0	0	0	0.0454177	0.208177	0.168444	0.106399	0.153169	0
BC005624	0.100167	0	0	0	0.0261489	0	0.00510336	0	0	0.0101278	0.0131844	0	0.137488	0.147126	0.107869
Usp20	0	0	0	0	0.0171915	0	0	0	0	0.123439	0.0869182	0.24025	0.0233524	0.546545	0
Fnbp1	0.193892	0	0	0.0398297	0	0	0.421591	0.783197	0.436048	0	0	0	0.502389	0	0.509427
Gpr107	0	0	0	0	0.0228511	0	0	0	0	0.115587	0.126052	0.303226	0.0155205	0.0875047	0
Ncs1	0	0	0.104146	0	0.748135	0.0273845	0	0	0	0.0357046	0.183329	0.183996	0	0.307265	0
Hmcn2	0	0	0.190893	0.0488534	0.162	0	0.471497	0	0	0	0	0	0	0	0.10907
Ass1	0.324195	0	0	0.341606	0.33369	0	0.710495	0	0	0	0	0	0	0	0.511713
Fubp3	0	0	0.00407206	0	0.319663	0.0339502	0	0	0	0.0759985	0.211267	0.225009	0	0.0817691	0
Exosc2	0	0	0	0	0.327583	0	0	0	0.0502959	0	0	0.14024	0	0	0
Abl1	0	0	0	0	0.299802	0.322204	0	0	0	0	0	0	0	0	0
Qrfp	0	0	0	0	0	0	0	0	0	0.286664	0.103835	0.186795	0	0.331357	0.73076
Fibcd1	0	0	0	0	0	0	0	0	0	0.598445	0.60994	0.391554	0	0.386131	0.130787
Lamc3	0	0	0	0	0	0	0	0	0	0.425145	0.0731314	0	0	0.975159	0
Aif1l	0	0.0875637	0.133885	0	0.658866	0	0	0	0	0	0.860128	0	0	0	0
Nup214	0	0.140077	0	0	0.0852128	0	0.0372093	0	0.248019	0	0	0	0.196994	0	0
Fam78a	0.180238	0	0	0	0	0	0.0549191	0.112963	0.356261	0	0.119297	0	0	0	0.713128
Plpp7	0	0	0	0	0.0218298	0	0	0	0	0.438076	0.368423	0.441023	0	0.711733	0
Prrc2b	0	0.195423	0	0	0.349604	0.332101	0	0	0	0.135201	0	0	0	0.0510997	0
Gm13610	0.610165	0	0	0	0.0785319	0.136299	0	0	0	0	0	0	0.232572	0	0
Pomt1	0	0	0	0	0.278771	0.130412	0	0	0	0.103401	0	0.0471612	0	0	0
Uck1	0	8.55432e-05	0	0	0.138723	0.320669	0	0	0.175989	0	0	0.00148611	0	0	0
Swi5	0	0	0	0	0.276587	0.201595	0	0	0	0.256174	0.245548	0.343893	0	0.199327	0
Golga2	0	0	0	0	0.0123404	0	0	0	0	0.30679	0.504693	0.491991	0	0.273001	0
Dnm1	0	0	0	0	0.497671	0	0	0	0	0	0.498608	0.65469	0	0.00297619	0
Ciz1	0	0.00325064	0	0	0.112468	0.0137526	0	0	0.277533	0	0	0	0.336991	0	0
1110008P14Rik	0.274789	0	0	0.115564	0.0628024	0.130979	0	0	0	0.0654033	0	0.107728	0.470803	0.288577	0
Lcn2	0	0	0.0191176	0.935645	0	0	0.34951	0	0	0	0	0	0	0	0.117181
Ptges2	0	0.0229683	0	0	0.343473	0.249624	0	0	0.14596	0	0	0.0877411	0.273568	0	0
Slc25a25	0	0	0	0	0	0.445738	0	0	0	0.548935	0.295558	0.257983	0	0.455634	0
Naif1	0	0	0	0	0	0	0	0	0.0689175	0	0.187428	0.125773	0	0.203829	0
Fam102a	0	0	0	0	0	0	0	0	0	0.356599	0.346736	0.655139	0.635044	0.636868	0.126525
Dpm2	0	0	0	0	0.214204	0.30049	0	0	0	0	0	0.151759	0	0	0
St6galnac4	0	0	0	0	0.31315	0.362807	0.150701	0	0	0.0300234	0	0	0.245324	0	0
St6galnac6	0	0	0	0	0.0997032	0.472332	0	0	0	0.541514	0.00922778	0.511031	0	0.352231	0
Ak1	0	0	0.139931	0	0.610946	0.431256	0	0	0	0.37831	0.139043	0.519708	0	0.336436	0
Eng	0	0.541454	0	0	0.160556	0.228767	0	0	0	0.213847	0	0.237274	0.0701528	0	0
Fpgs	0.210264	0	0	0	0.346025	0	0	0	0	0.00772609	0	0.198882	0	0	0
Cdk9	0	0	0	0	0.0901173	0.0304082	0	0	0.172533	0	0	0.00597477	0.159456	0	0
Sh2d3c	0	0.575464	0	0.837672	0	0.399096	0	0	0	0	0	0	0.317175	0	0
Ttc16	0.0938608	0.00362173	0	0	0.143229	0.0767676	0	0	0	0.198004	0	0.1501	0	0	0
Tor2a	0.520706	0	0	0	0.110259	0.341026	0	0	0	0.0794154	0	0.10532	0.017574	0.013083	0
Ptrh1	0	0	0	0	0.626861	0	0	0	0.126958	0	0.0677617	0	0	0	0
Stxbp1	0	0	0	0	0.459687	0.152131	0	0	0.00443787	0	0	0	0	0	0
Gm13524	0	0	0	0	0.489875	0.590222	0	0	0	0	0	0.00267539	0	0.139373	0
Gm13523	0.466443	0.269491	0	0	0	0.0345241	0	0	0.246506	0	0.0221219	0	0	0	0
Fam129b	0	0.155261	0	0	0.0180426	0	0.366094	0.504378	0.865544	0	0	0	0.218925	0	0
Lrsam1	0	0.02716	0	0	0.24306	0.313357	0	0	0	0	0	0	0	0	0
Rpl12	0.196327	0.0237382	0.221298	0	0.240725	0.0911006	0.137791	0.126688	0	0.188783	0.221892	0.206402	0	0	0.222765
Slc2a8	0	0	0	0	0.0252128	0	0	0	0	0.0233615	0.651346	0.066511	0	0.0407186	0
Garnl3	0	0.0583507	0.0299852	0	0.209416	0.266739	0	0	0	0.127024	0	0.30795	0	0	0
Ralgps1	0	0.152394	0	0.259681	0	0	0.0278764	0.159219	0.27991	0	0	0	0.171472	0	0
Angptl2	0	0.55371	0.156096	0	0.825605	0.155313	0	0	0	0	0	0	0	0	0
Zbtb34	0	0	0	0.0309904	0.0519362	0.242252	0	0	0	0	0.084928	0	0.346223	0.00708245	0
Zbtb43	0	0.149434	0	0	0	0	0.145747	0	0.110346	0.269001	0	0	0.396338	0	0
Lmx1b	0	0	0	0	0.673312	0.595298	0	0	0	0	0	0.263404	0	0.0402875	0
C130021I20Rik	0	0	0	0	0.562304	0.366875	0	0	0	0.0304201	0.00103963	0.605659	0	0	0
Mvb12b	0.20081	0.512185	0	0.652202	0	0.216286	0.0596124	0.294682	0.202164	0	0	0	0.33612	0	0.291026
Pbx3	0	0	0	0	0.171581	0.0134102	0	0	0	0.311811	0	0.238411	0	0	0
Mapkap1	0	0.0893499	0	0	0.0920213	0.349609	0	0	0	0.219585	0	0.0612944	0.212233	0.214118	0
Gapvd1	0	0.12592	0	0	0.025766	0	0.109884	0.104503	0.145218	0	0	0	0.116189	0	0
Hspa5	0.22596	0	0	0	0.153627	0.188357	0.165052	0.175988	0	0.119959	0.199915	0.187219	0.0271729	0	0.136911
Rabepk	0	0	0	0	0.502559	0.261046	0	0	0	0	0	0.238102	0	0	0
Fbxw2	0.0170284	0.164542	0	0.0845684	0.128664	0.270349	0.080168	0	0	0	0	0	0.118052	0	0.227156
Psmd5	0	0.0862703	0	0	0.301113	0.146799	0	0	0.0329523	0	0	0.0582616	0.252641	0.0358836	0
Phf19	0	0	0	0.583243	0.19583	0	0.337039	0.259455	0	0	0	0	0.400709	0	0.021682
Traf1	0.286234	0.217431	0	0.222303	0	0	0.706966	0.453628	0.22795	0	0	0	0.434938	0	0.605136
Cntrl	0	0.00671514	0	0.752386	0.0694468	0.0212851	0.173122	0	0	0	0	0	0.310631	0	0.413122
Rab14	0	0.1216	0	0	0.228931	0.169558	0.0726744	0	0.107092	0	0.0345435	0	0.14384	0	0
Gsn	0	0	0.0359082	0	0.309402	0	0	0	0	0.283338	0.23128	0.393533	0.135673	0	0
Stom	0	0	0	0.290319	0	0	0.586518	0.834155	0.67399	0	0	0	0.0966872	0	0
Ggta1	0.416372	0.0631001	0	0.433358	0.172979	0	0.616099	0.549099	0	0	0	0	0	0	0
Dab2ip	0	0.205659	0	0	0.273518	0	0	0	0	0.751428	0.400342	0.685678	0	0	0
Ttll11	0.145336	0	0	0	0.21066	0	0	0	0	0	0	0.126198	0.700477	0	0
Ndufa8	0	0.0117194	0	0	0.27405	0.16782	0	0	0	0.145906	0.0806217	0.221622	0.213945	0.158987	0
Morn5	0	0.362564	0	0	0.296281	0.22341	0	0	0	0	0.60452	0	0	0.0384727	0
Rbm18	0	0.000940975	0	0	0.0828975	0.0259048	0	0	0	0.397617	0.235592	0.255569	0	0.357187	0
Mrrf	0	0	0	0	0.526336	0.284756	0	0	0	0	0	0	0	0	0
Gm13431	0	0	0	0.93815	0	0	0	0	0	0	0	0	0	0	0
Ptgs1	0	0	0	0.815139	0.145723	0.155944	0	0	0	0	0	0.00097052	0	0.0183404	0
Olfr338	0	0.332196	0.178801	0	0.0706809	0.504	0	0	0	0	0	0	0	0	0.077474
Pdcl	0.0929048	0.125492	0	0	0.0265957	0	0	0	0	0	0	0.158723	0.0182904	0	0
Rc3h2	0	0.135073	0	0	0.192284	0.151154	0	0	0	0.0349298	0.0736652	0.0906374	0	0.0624289	0
Zbtb6	0	0.0194183	0	0	0.106532	0.0890493	0	0	0.0646582	0	0	0	0	0	0
Zbtb26	0	0	0	0.0243436	0.102468	0.136556	0	0	0	0	0.00604715	0.079886	0	0.0883908	0.0162037
Rabgap1	0	0.0986741	0	0	0.154733	0.261597	0	0	0	0	0.145224	0	0	0.0644672	0
Strbp	0.576975	0.17565	0	0.350717	0	0	0	0	0	0.171328	0.345861	0	0.376843	0.595488	0.375546
Gpr21	0	0.247918	0	0	0.0577234	0.243053	0	0.201377	0	0	0	0	0	0	0.0760272
Dennd1a	0	0	0	0	0	0.197268	0.441774	0.536926	0.545224	0	0	0	0	0	0
Lhx2	0	0	0.137463	0	0.25925	0.886502	0.0164577	0	0	0	0	0	0	0	0
Nek6	0	0.109923	0	0	0.252496	0.539149	0.102999	0	0	0.0419564	0	0	0	0	0
Psmb7	0	0.164671	0	0	0.251995	0.10238	0	0	0	0.160612	0	0.288825	0.156304	0.135997	0
Nr5a1	0.174472	0	0	0	0	0	0	0	0	0.569345	0.572356	0.347622	0	0	0
Nr6a1	0	0	0	0	0	0.0131268	0	0	0	0.641579	0.382403	0.336609	0	0.0301974	0
Nr6a1os	0	0	0	0	0	0.161978	0	0	0	0.152112	0	0	0.740661	0.228914	0
Olfml2a	0	0.665578	0	0	0.325308	0.871977	0	0	0	0	0	0	0	0	0
Gm13496	0	0	0.400542	0	0.36892	0.279781	0	0	0.0185346	0	0.0469056	0	0	0	0
Wdr38	0	0	0.0904492	0.27989	0	0.136767	0	0	0	0	0	0	0	0.216701	0
Rpl35	0.158013	0.00654405	0.0781096	0	0.226768	0.104404	0.0450904	0.0595468	0	0.195535	0.192448	0.192901	0.0641834	0.0409082	0.0293094
Arpc5l	0.307499	0.14645	0	0	0.098706	0.139976	0	0	0	0.279318	0.283094	0.225306	0	0.332664	0
Golga1	0	0.117494	0	0	0.0802979	0.143378	0	0	0	0.0903652	0.0542713	0.172096	0	0.179403	0
Scai	0	0	0	0	0.119872	0.264777	0	0	0	0.135125	0.267345	0.0915019	0	0.133575	0
Ppp6c	0	0.169376	0	0	0.147187	0.130522	0.047739	0	0	0	0	0.00915929	0.14809	0	0
Arhgap15	0.359648	0	0	0.663413	0	0	0.289525	0.117325	0	0	0	0	0	0	0.625795
Gtdc1	0.0697363	0.453685	0	0.101482	0.0969362	0	0.278326	0.182888	0	0	0	0	0.419441	0	0.110908
Zeb2	0	0.0184346	0	0	0.166877	0.355915	0.387869	0.525001	0.41498	0	0	0	0.0591213	0	0
Zeb2os	0	0	0	0	0	0.239161	0.401104	0.560616	0.109293	0	0	0.00491326	0	0	0
Gm13479	0	0	0	0	0	0	0.0219845	0.71122	0.159706	0	0	0	0.6001	0	0
Gm13470	0	0	0	0	0.398108	0.129343	0	0	0	0.678466	0	0.592843	0	0	0
Acvr2a	0	0.0357998	0	0	0	0.764598	0	0	0	0	0	0	0	0	0
Orc4	0	0.0928999	0	0	0.223549	0.331031	0	0	0	0	0	0	0	0.0752275	0
Mbd5	0	0.0317365	0	0	0.145558	0.436298	0	0	0	0	0.113297	0.0347871	0	0.200922	0
Epc2	0	0.12485	0	0.0371576	0.0485319	0.0798234	0.104264	0	0	0.233628	0	0	0.032999	0	0.0290418
Kif5c	0	0.488247	0	0	0.593911	0	0	0	0	0	0	0	0	0	0.199167
Lypd6	0.387844	0.572605	0.0867876	0	0.239319	0	0	0	0	0	0	0	0	0	0.297874
Mmadhc	0	0	0	0	0.185142	0	0	0	0	0.123912	0.0411608	0.405941	0	0.0822905	0
Gm13483	0	0	0	0	0.602114	0.263643	0	0	0.101897	0.178845	0.0489848	0.172949	0	0	0
Gm48908	0	0	0.234525	0	0.430089	0.228771	0	0	0	0	0	0	0.549892	0	0
Rnd3	0	0.0589393	0.0756417	0	0.482622	0.436386	0	0	0	0.0183651	0	0.221021	0	0	0
Gm13499	0	0	0	0	0	0	0	0.641242	0.710727	0	0	0	0	0	0.406628
Rbm43	0	0.00757057	0	0.31061	0.257905	0.317266	0	0	0.00567376	0	0	0	0.0612225	0	0.136105
Nmi	0.112544	0.331084	0	0	0.103638	0.355013	0.363161	0	0	0	0	0	0.0223018	0	0.457697
Tnfaip6	0	0	0	0.0823363	0.330677	0.547759	0	0	0	0.372988	0	0	0	0.485022	0
Rif1	0.0489983	0.117408	0	0	0.22936	0.196233	0	0	0	0.119743	0	0	0.0748329	0.0513002	0.176383
Neb	0	0.211726	0	0	0	0	0	0	0	0	0	0	0	0	0.910041
Gm13522	0	0	0	0	0.25894	0	0	0.0255156	0	0	0	0	0	0	0.690591
Arl5a	0	0.2374	0	0	0.309537	0	0.180311	0	0.158124	0	0	0.0185915	0	0	0
Cacnb4	0	0	0	0	0.0617872	0	0.38751	0	0	0.159667	0.0945729	0	0.310163	0	0
Stam2	0	0.11296	0	0	0.0408085	0	0.157822	0.0487098	0.530834	0	0	0	0.129131	0	0
Fmnl2	0	0.229389	0	0.0755562	0.0258936	0	0	0	0	0	0.462928	0	0	0.590576	0
Prpf40a	0	0.185073	0	0	0.193156	0.172313	0.0457364	0	0	0.166924	0	0.0805619	0.145702	0	0
Arl6ip6	0	0	0	0.0312767	0.201473	0	0	0	0	0	0.20187	0.00439767	0	0	0
Rprm	0	0	0	0	0.250425	0	0	0	0	0	0	0.388206	0	0	0.767023
Galnt13	0	0	0.28392	0	0.646577	0.826125	0	0	0	0	0	0	0	0	0
Kcnj3	0	0	0	0	0	0	0	0	0	0.20388	0.84216	0	0	0.925545	0
Nr4a2	0	0	0	0	0.0473286	0	0	0	0	0.652039	0.42121	0.590256	0	0.610093	0
Gpd2	0.0268781	0.25071	0	0.186209	0.0776809	0.164245	0.223328	0	0	0.039826	0	0	0.028319	0	0
Gm33594	0	0	0	0	0	0	0	0	0	0.348817	0	0.144153	0.347748	0	0.300943
Galnt5	0	0	0	0	0	0	0	0	0	0.895426	0.230375	0.849718	0	0.691187	0
Cytip	0.679412	0	0	0.346641	0	0	0.547016	0.136516	0.417616	0	0	0	0.279107	0	0.679056
Acvr1c	0	0	0	0	0	0.814814	0	0	0	0	0	0	0	0	0.297505
Acvr1	0	0.078657	0	0	0.500989	0.508579	0	0	0	0.29657	0	0.125373	0	0.472937	0
Upp2	0	0	0	0	0.160314	0.508761	0	0	0	0	0	0.0408225	0.236643	0.336687	0
Ccdc148	0	0	0	0	0	0	0.562377	0	0	0.0794476	0.0930037	0.052954	0	0.253688	0
Pkp4	0	0	0	0	0	0	0.00658915	0.0436784	0	0.664034	0.144077	0.42633	0	0.350893	0
Tanc1	0	0	0	0	0.372682	0.396975	0	0	0	0.570107	0.0416206	0.619903	0	0	0
Wdsub1	0	0	0	0	0.187581	0.409037	0	0	0	0	0	0	0.410933	0.0151593	0
Baz2b	0.018197	0.177459	0	0.313445	0	0.206237	0.0866925	0	0	0.287302	0	0	0.146753	0.144224	0
Gm13620	0	0	0	0.603577	0	0.0381192	0	0	0	0.0836718	0	0	0.224568	0.147093	0
2023-03-07	0	0.178272	0	0	0.135188	0.0743679	0.0166667	0	0	0.20328	0.192062	0	0.0549188	0.120781	0.0455032
Cd302	0	0	0	0	0.326275	0.599466	0.0282132	0	0	0.267716	0	0.224342	0	0	0
Ly75	0	0	0	0.326379	0.574769	0.591808	0.309016	0	0	0	0	0	0	0	0.0248119
Gm13571	0	0	0	0	0	0	0.942811	0	0.877973	0	0	0	0	0	0
Pla2r1	0	0	0.19003	0	0.639837	0.758929	0	0	0	0	0	0.0492271	0	0	0
Itgb6	0	0	0	0	0.212368	0.366844	0	0.0759588	0	0.0139566	0.256155	0	0	0.241486	0
Rbms1	0	0.157442	0	0	0.222686	0.341773	0.318645	0.17109	0.19963	0	0	0	0	0	0
Tank	0.37972	0.0510693	0	0.156885	0	0.301771	0.396989	0.298458	0.11711	0	0	0	0.312703	0	0.0644406
Psmd14	0.0324708	0.110864	0	0	0.341904	0.248447	0	0	0	0	0	0.212599	0.139494	0	0
Tbr1	0.0148493	0	0	0	0.0981064	0.146127	0	0	0	0	0	0	0.35821	0	0
Gcg	0	0	0	0	0.558036	0.406922	0	0	0	0.200766	0	0.556369	0	0	0
Fap	0	0	0.0523198	0	0	0.0298427	0	0	0	0.810031	0.601813	0.729636	0	0.297663	0
Ifih1	0	0	0	0	0	0.184339	0.72103	0.480681	0	0	0	0	0	0	0.0211456
Gca	0.355355	0	0	0.896482	0	0	0.36257	0	0	0	0	0	0.042187	0	0
Fign	0	0.552334	0	0	0.0122553	0.346809	0	0	0	0.128126	0.502045	0.646262	0	0	0
Grb14	0	0	0.133514	0	0.776951	0.702432	0	0	0	0	0	0.113532	0	0.210657	0
Cobll1	0.0903841	0.0599658	0	0	0.706547	0.540881	0	0	0	0	0	0	0	0	0
Gm13594	0	0	0	0	0.386694	0.608509	0	0	0	0	0	0	0	0	0
Scn3a	0	0	0	0	0	0	0.0607367	0	0	0.900402	0.217408	0.305249	0	0.555726	0
Scn2a	0	0	0	0	0.490694	0.628705	0	0	0	0	0	0.393452	0	0.0858014	0
Csrnp3	0	0.257493	0	0	0	0	0	0	0	0.221653	0	0.764071	0	0.446262	0
Galnt3	0	0	0	0	0	0	0	0	0	0.541569	0.63594	0.836372	0	0.767719	0
Ttc21b	0	0	0	0	0.163457	0.177747	0	0	0	0.317444	0.133206	0.0716603	0	0.734701	0
Scn1a	0	0	0	0	0	0	0	0	0	0.748061	0.607128	0	0	0.964889	0
Gm13629	0	0	0	0	0	0	0	0	0	0.408986	0.691653	0	0	0.842012	0
Scn7a	0	0.940442	0.0360963	0	0	0.457518	0	0	0	0	0	0	0	0	0
B3galt1	0	0.10835	0	0	0.58037	0.836107	0	0	0	0	0	0	0	0	0
Stk39	0	0	0	0.15279	0.527899	0.132748	0	0	0	0	0.250932	0.336263	0	0	0.0334201
Cers6	0	0	0	0.0222946	0.277763	0.0287035	0.52154	0	0.368994	0	0	0	0.195857	0	0
Nostrin	0	0	0	0	0	0.0975519	0.444011	0.672233	0.653808	0	0	0	0.648813	0	0
Spc25	0	0	0	0.675621	0.569065	0	0	0	0	0	0	0	0.176982	0	0.265318
Dhrs9	0	0	0	0.810168	0	0	0.190434	0.494635	0.927281	0	0	0	0	0	0
Bbs5	0	0	0	0	0.262984	0.14749	0	0	0	0	0.672182	0.212543	0	0	0
Klhl41	0.698886	0	0	0	0	0	0	0	0	0.140211	0.117231	0	0	0	0
Fastkd1	0	0	0	0	0.173128	0.139666	0	0	0.295727	0	0	0	0.493305	0	0
Ppig	0	0.00248075	0	0	0.246723	0.232326	0.0986434	0	0	0	0.0469281	0.0415167	0	0.0081058	0
Ccdc173	0	0.0186056	0	0	0.0566596	0.347282	0	0	0	0	0.097252	0	0	0.228749	0.00434028
Phospho2	0.0194491	0	0	0	0.0855957	0.173542	0	0	0	0	0	0.109184	0.0297039	0	0
Klhl23	0	0	0	0.675984	0.3531	0.385417	0	0	0	0	0	0	0	0	0
Ssb	0	0.152438	0	0	0.246219	0.198783	0	0	0	0.15912	0.0306581	0.193403	0.0519102	0.127892	0
Mettl5	0.00584307	0.0123182	0	0	0.142277	0.309312	0	0	0	0	0	0	0.0784623	0	0
Mettl5os	0	0.429425	0	0	0.234657	0.282116	0	0	0	0	0	0	0	0	0
Ubr3	0	0	0	0	0.0411702	0.0880641	0	0	0	0.248075	0.255374	0.207206	0	0.161022	0
Sp5	0	0.88438	0	0	0	0.00559233	0	0	0	0	0.077771	0	0	0	0.100595
Gad1os	0	0.73177	0	0	0.460689	0.00513581	0	0	0	0	0	0	0	0	0.216445
Erich2	0	0.282399	0	0	0.536966	0.337554	0	0	0	0	0	0	0	0	0.194536
Gm26558	0	0.102291	0	0	0	0	0	0	0	0.662039	0.210028	0.301627	0	0.371353	0
Gorasp2	0.185952	0	0	0	0.0966592	0	0	0	0	0.342772	0.269216	0.463479	0	0.283174	0
Tlk1	0.184662	0.0221985	0	0	0.0355957	0	0.0682817	0	0.297025	0	0	0	0.217889	0	0
Mettl8	0.186674	0.145174	0	0	0.199979	0.00667656	0	0	0.148039	0	0	0	0	0	0
Dcaf17	0	0.203131	0	0	0.143085	0.393339	0	0	0	0	0	0	0	0	0.0708011
Cybrd1	0	0	0	0	0	0	0	0	0	0.657498	0.531848	0.972216	0	0.44754	0
Dync1i2	0	0.230659	0	0	0.136932	0.159358	0.116731	0.0734276	0.223298	0	0	0	0.0816619	0.080347	0
Slc25a12	0	0.0175791	0	0	0.17859	0	0.00439276	0.0739359	0.00957447	0	0	0	0.356279	0	0
Hat1	0	0	0	0.147357	0.339962	0	0.05323	0	0	0	0	0	0.435389	0	0.126342
Metap1d	0	0	0	0	0.362758	0.43224	0	0	0	0	0	0	0	0.012135	0
Dlx1	0	0.822382	0	0	0.161043	0.0217416	0	0	0	0	0	0	0	0	0
Dlx2	0	0.682116	0	0	0.308882	0	0	0	0	0	0.322875	0.129261	0	0	0
Itga6	0	0.653239	0	0.100432	0	0	0.299695	0.84149	0	0	0	0	0.266241	0	0.225921
Pdk1	0	0	0	0	0.136376	0	0	0	0	0.381398	0.754613	0.428005	0	0.299297	0
Rapgef4	0	0	0	0	0	0	0	0	0	0.637273	0.357888	0.906158	0	0.672779	0
Rapgef4os3	0	0	0	0	0	0	0	0	0	0.75965	0.0666169	0	0	0.484184	0
Map3k20	0	0	0	0	0.0918609	0	0	0	0	0.488232	0.543944	0.252683	0	0.459919	0
Cdca7	0	0	0	0.758725	0.276946	0.089249	0	0	0	0	0	0	0	0	0.0991747
Sp3	0	0	0	0.273567	0.0603394	0.349188	0	0	0	0	0	0	0	0.0213785	0
Sp3os	0.0127713	0	0	0	0.0439149	0.347392	0	0	0	0	0.17931	0.0790974	0.124833	0.305652	0
Ola1	0	0.0216424	0	0	0.429281	0.208695	0	0	0	0.182532	0	0.140147	0	0	0
Sp9	0	0	0.194719	0	0.198083	0	0	0	0	0.163248	0.682076	0	0	0	0.108796
Cir1	0.0777129	0	0	0.0223781	0.156054	0.190027	0	0	0	0.243094	0.0916166	0	0	0.204806	0.141674
Scrn3	0	0	0	0	0.287674	0.194317	0	0	0	0.175662	0.0943544	0.342349	0	0.309916	0
Gpr155	0.556932	0	0	0	0	0.164888	0.1868	0.0505595	0	0	0	0	0	0	0
Gm13703	0.0694814	0.156812	0.303897	0	0	0.735107	0	0	0	0	0	0	0	0	0
Gm13709	0	0	0.44831	0	0.0904917	0.762493	0	0	0	0	0	0	0	0	0
Wipf1	0	0.330985	0	0.14505	0.0410213	0	0.272852	0.438134	0.644042	0	0	0	0.618263	0	0.280591
Chrna1	0	0	0.167572	0	0.162665	0	0	0	0	0.295793	0.00580969	0.878954	0	0	0
Chrna1os	0	0	0	0	0.319736	0.371339	0	0	0	0.382767	0	0.795291	0	0	0
Chn1os3	0	0	0.15844	0	0.3827	0.306063	0	0	0	0.132514	0	0.478326	0	0	0
Chn1	0	0.00573441	0.0286278	0	0.698583	0	0	0	0	0.0836721	0	0.934235	0	0	0
Atf2	0	0	0	0	0.159933	0.214338	0	0	0	0	0.0203613	0	0	0	0
Atp5g3	0.0124374	0	0	0	0.201473	0.207426	0	0	0	0.17987	0.071576	0.215372	0.230611	0.138273	0
Lnpk	0	0.0181352	0	0.287639	0.173767	0.0333828	0	0	0	0	0	0.00979619	0	0	0
Hoxd10	0	0.915191	0	0	0	0	0	0	0	0.376817	0	0.0113733	0	0.220483	0
Hoxd9	0	0.654175	0	0	0.167596	0	0	0	0	0.00662063	0.0540799	0.218649	0	0.518751	0
Hoxd3os1	0	0.575506	0	0	0	0	0	0	0	0.516995	0.0822872	0.606136	0	0.566333	0
Hoxd8	0	0.671928	0	0	0.240176	0.1716	0	0	0	0.0762157	0	0.158165	0	0.0856621	0
Hoxd1	0	0.363599	0	0	0	0	0	0	0	0.290204	0.717792	0.268589	0	0.39751	0
Mtx2	0.0123539	0.118306	0	0	0.324843	0.291735	0	0	0	0	0	0.210273	0.297348	0	0
Hnrnpa3	0.0125209	0.139435	0	0.109051	0.194338	0.158987	0.118475	0.0169961	0	0.12428	0	0.070432	0.191929	0	0.164414
Nfe2l2	0	0	0	0.248558	0	0	0.349377	0.410769	0.177494	0.149559	0	0	0	0	0
Agps	0	0.0131737	0	0	0.250825	0.399915	0	0	0	0	0	0	0.2487	0	0
Ttc30b	0	0	0	0	0.37598	0.548721	0	0	0	0	0	0.0954969	0	0	0
Ttc30a1	0	0	0.166955	0	0.298743	0.142081	0	0	0.0441176	0	0	0.268947	0	0	0
Pde11a	0	0	0	0	0	0.0235497	0	0	0	0	0.147625	0	0	0.853306	0
Rbm45	0	0.0403764	0	0	0.0861277	0.0171194	0	0	0	0.121954	0	0.111064	0.0131328	0.0450186	0
Osbpl6	0	0	0	0	0	0.19165	0	0	0	0.326393	0.726706	0.0558803	0	0	0.183663
Prkra	0	0.0735672	0	0	0.282382	0.26486	0	0	0	0	0.294165	0.153596	0.0340974	0	0
Fkbp7	0	0	0.0871175	0	0.0575801	0	0	0	0	0.60728	0.614799	0.669774	0	0.587051	0
Plekha3	0	0.187553	0	0	0.276598	0	0	0	0	0.218061	0.175649	0.280792	0	0.103005	0
Ttn	0.595985	0.495658	0	0	0	0	0	0	0	0	0	0	0.665052	0	0.381014
Ccdc141	0.545158	0	0	0	0.374546	0.0895914	0	0	0	0	0.112676	0	0	0	0
Sestd1	0	0.0366125	0	0	0.00580851	0	0.494611	0.328359	0.90778	0	0	0	0.481464	0	0
Zfp385b	0	0	0	0	0	0	0	0	0	0.600646	0.930323	0.696767	0	0.728539	0
Cwc22	0.0796327	0.0386228	0	0	0.128468	0.0416857	0	0	0.0403369	0	0	0	0.110991	0	0.0694593
4930440I19Rik	0	0	0	0	0	0	0.348621	0.658755	0.0940739	0	0	0	0.743605	0	0
Gm14461	0	0	0	0	0	0	0.602966	0.386739	0.891489	0	0	0	0	0	0
Ube2e3	0.062187	0.181309	0	0	0.260993	0.337393	0	0	0	0.177308	0.0254978	0	0	0.237981	0
Itga4	0.636136	0	0	0.26573	0	0	0.367516	0.42946	0	0	0.0653705	0	0.444529	0	0.493889
Cerkl	0.374324	0.348185	0	0.0657004	0.0225957	0.159553	0.0388309	0	0	0	0	0	0.199963	0	0.418543
Ssfa2	0	0.152267	0	0	0	0	0.555074	0.59229	0.310082	0	0	0	0.130353	0	0
Pde1a	0	0	0	0	0	0.808659	0	0	0	0.73075	0	0.0362069	0	0.577913	0
Dnajc10	0	0.0298118	0	0	0.441001	0.427585	0	0	0	0.0628826	0	0.275525	0	0	0
Frzb	0	0.247432	0	0	0	0	0	0	0	0.708278	0.572525	0.562579	0	0.850059	0
Nckap1	0	0.372184	0	0	0.545097	0.422956	0	0	0	0.373601	0.291575	0.438034	0	0.482968	0
Dusp19	0	0	0	0	0.38303	0.290615	0	0	0	0	0.290928	0.110056	0	0.0761016	0
Nup35	0.0267112	0.0502566	0	0	0.412926	0.00958685	0	0	0	0	0	0.0929577	0	0	0
Zc3h15	0	0.184559	0	0	0.275301	0.186827	0	0	0	0.223676	0.0631374	0.167563	0	0.052901	0
Itgav	0	0.209581	0	0	0.0990338	0	0	0.204297	0	0.142908	0.0454104	0.108753	0.395092	0.0180129	0
Fam171b	0	0.546343	0	0	0.478013	0.547677	0	0	0	0	0	0.319775	0	0	0
Calcrl	0	0.534884	0	0.513119	0	0.238945	0.206974	0.140758	0	0	0	0	0.62503	0	0.182768
Tfpi	0	0.305972	0	0	0.443009	0.493375	0	0	0	0	0	0.0358183	0	0	0
Gm13710	0	0	0	0	0	0.0195732	0.288562	0.560858	0	0	0	0	0.316981	0	0
Ctnnd1	0	0.174679	0.011846	0	0.535011	0.243339	0	0	0	0	0.107273	0	0	0	0
Selenoh	0	0	0	0	0.554516	0	0	0	0	0	0.432636	0.177272	0	0	0
Tmx2	0	0	0	0	0.445615	0.0743443	0	0	0	0.0415016	0.269371	0.382268	0	0.105722	0
Med19	0	0.301662	0	0	0.430256	0.293106	0	0	0	0	0	0.111806	0	0.0304323	0
Zdhhc5	0	0	0	0	0.202225	0.195696	0	0	0	0.0779062	0.130569	0.143098	0	0.0266875	0
Clp1	0.165906	0	0	0	0.011383	0	0.0341731	0	0.0163121	0.0571428	0	0.0227162	0.0646609	0.0528133	0.0637045
Ypel4	0	0	0	0	0.0092766	0	0	0	0	0.497982	0.21034	0.223816	0.0256964	0.198797	0.341046
Gm19426	0	0	0.168435	0	0.607748	0.820806	0	0	0	0	0	0	0	0	0
Serping1	0	0	0.162142	0	0.661202	0.814124	0	0	0	0.163421	0	0	0	0	0
Ube2l6	0	0	0	0	0.532379	0.432122	0.188695	0.0142185	0.0346328	0	0	0	0.176128	0	0
Timm10	0	0.16698	0	0	0.367366	0.203528	0	0	0.405046	0	0	0	0.377549	0	0
Slc43a1	0	0	0.0736673	0	0.373804	0.707416	0	0	0	0	0	0.579621	0	0	0
Slc43a3	0	0.425144	0	0.143041	0.341638	0.722923	0	0	0	0	0	0	0.501805	0	0
Prg2	0.913373	0	0	0	0	0	0	0	0	0	0	0	0.0739673	0	0.0584916
Ssrp1	0	0.0824636	0	0	0.354759	0.0403239	0	0	0	0	0.177916	0	0.116046	0	0
Tnks1bp1	0	0.334522	0	0	0.467684	0.466242	0	0	0	0.0390562	0	0.0569877	0	0.158603	0
Gm13713	0	0.734213	0	0	0.26871	0	0	0	0	0.112023	0.235329	0.0587468	0	0	0
Olfr1033	0	0	0	0	0	0.156463	0	0	0	0.12762	0	0.200146	0	0	0.546033
Olfr1124	0	0	0	0.615517	0	0.0869664	0	0	0	0	0	0	0	0	0
Ptprj	0	0	0	0.0408317	0	0	0.516178	0.719647	0.0268617	0	0	0	0.282286	0	0
4933423P22Rik	0.265048	0	0	0.608978	0	0	0.269386	0.0732026	0	0	0	0	0	0	0
Nup160	0	0.0981608	0	0	0.172426	0	0	0	0	0	0	0.00254762	0.00639924	0	0
Fnbp4	0	0.0795552	0	0	0.112362	0.0747932	0	0	0.0400709	0	0	0	0.0729704	0	0.0635037
Agbl2	0	0.212659	0.0840326	0	0.409745	0.306095	0	0	0	0	0	0	0	0.155091	0.0443432
Mtch2	0	0.145766	0	0	0.32193	0.290729	0	0	0	0	0	0.0778958	0.183238	0	0
C1qtnf4	0.523685	0	0	0	0	0	0	0	0	0.119398	0.771299	0.0308747	0	0.642772	0
Ndufs3	0.164105	0	0	0	0.277753	0.25605	0	0	0	0.137018	0.210783	0.304231	0.206351	0.15292	0
Kbtbd4	0.223869	0.0192472	0	0	0.148447	0.0538975	0	0	0.123887	0	0	0.0393667	0.0589303	0	0
Celf1	0	0.124979	0	0	0.186157	0.246616	0	0	0.0629433	0	0	0	0.0648042	0.00137467	0
Rapsn	0	0	0	0	0.0429574	0.0581488	0.0309131	0.162887	0	0	0	0	0	0	0.767691
Psmc3	0	0.0764756	0	0	0.275745	0.169298	0	0	0	0.121489	0	0.243298	0.111318	0.0991657	0
Slc39a13	0	0	0	0	0.191488	0	0	0	0	0.527659	0.543311	0.648504	0.00649475	0.548668	0
Spi1	0	0	0	0.679337	0	0	0.603366	0.793328	0.645146	0	0	0	0.567462	0	0
Mybpc3	0	0	0	0.119077	0	0	0.765133	0.761885	0.217041	0	0	0	0.573053	0	0
Madd	0.045409	0	0	0	0	0	0.324411	0.299317	0.205811	0	0	0	0.370573	0	0.554565
Nr1h3	0	0	0	0	0	0.652001	0.541317	0.3162	0.514164	0	0	0	0.293579	0	0
Acp2	0	0	0	0	0	0.0281328	0.40168	0.595028	0.21091	0	0	0	0.193933	0	0
Ddb2	0	0	0	0	0.110085	0.220556	0	0	0	0	0	0	0.501627	0	0.160113
A330069E16Rik	0	0	0	0	0.096766	0	0	0	0	0.0581641	0.269212	0.166559	0	0	0
Gm17281	0	0	0	0	0.304456	0.302571	0	0	0	0	0.420133	0.401696	0	0.157448	0
Pacsin3	0	0	0.0671273	0	0.541978	0.489879	0	0	0	0	0.0526541	0.174119	0	0.384735	0
Arfgap2	0	0	0	0	0.091583	0.133699	0	0	0	0.154164	0	0.164176	0.0086915	0.234842	0
1110051M20Rik	0	0	0	0	0.592289	0.428049	0	0	0	0.00121951	0	0.418171	0	0	0
Lrp4	0	0	0.173865	0	0.397652	0.351542	0	0	0	0.610123	0.026113	0.519844	0	0.280067	0
Ckap5	0	0.0568862	0	0	0.320735	0	0	0	0	0	0.463491	0	0	0.0456959	0
F2	0	0	0	0	0	0	0	0	0	0.381371	0.0444592	0.335424	0	0.0307056	0
Zfp408	0	0	0	0	0.0778298	0.0536122	0	0	0	0	0.0719152	0	0	0	0.02568
Arhgap1	0	0.0878101	0	0	0.371877	0.430744	0	0	0	0	0	0	0	0	0
Atg13	0.194997	0	0	0	0	0	0.0354651	0	0.191778	0.170334	0.230809	0.190115	0	0.244398	0
Harbi1	0.397148	0	0	0	0.0919362	0	0	0	0	0	0.172914	0.134235	0	0.0564657	0
Ambra1	0	0	0	0	0.0334255	0.00430838	0	0	0.451503	0	0	0	0.00109838	0	0
Mdk	0	0	0.082922	0	0.329084	0.832828	0	0	0	0	0	0.0142093	0	0	0
Dgkz	0	0	0	0.185337	0	0	0.197869	0.664277	0.718251	0	0	0	0.399039	0	0
Creb3l1	0	0	0.17843	0	0.163315	0	0	0	0	0.596911	0.647462	0.668201	0	0.600864	0
2900072N19Rik	0	0	0.0831688	0	0	0	0	0	0	0.435734	0.330551	0.522513	0	0.440925	0
Phf21a	0	0	0	0	0.0681702	0.248115	0	0	0	0.191682	0.126085	0.142322	0	0.0498673	0
Large2	0.804487	0	0	0	0.0105957	0	0	0	0	0	0.200465	0.12268	0	0	0
Pex16	0.309453	0	0	0	0.0336383	0.500404	0	0	0.0467199	0	0	0	0.262817	0	0
1700029I15Rik	0.0334663	0	0	0	0	0.478084	0	0	0	0	0	0	0	0	0
Mapk8ip1	0	0.449338	0	0	0.324956	0.521844	0	0	0	0	0	0.00294189	0	0	0
Cry2	0	0.0886655	0	0	0.125936	0.400727	0	0	0	0.418305	0.0740585	0	0	0	0
Slc35c1	0	0	0	0	0	0	0	0	0.165707	0	0	0.288659	0.00429799	0	0
Chst1	0.871511	0.564816	0	0	0.223404	0.248743	0	0	0	0	0	0	0	0	0.178207
Syt13	0	0.522596	0	0	0.842912	0	0	0	0	0	0.00935665	0	0	0	0
Prdm11	0	0	0	0	0.123357	0.835534	0	0	0	0	0	0	0	0	0
4631405J19Rik	0	0	0	0	0	0	0	0	0	0.103174	0	0	0	0.968828	0
Trp53i11	0.720566	0.648895	0	0	0.229532	0.059661	0	0	0	0	0	0	0	0	0.585121
Tspan18	0	0.493266	0	0	0.875963	0.560331	0	0	0	0	0	0	0	0	0
Cd82	0.121786	0.00667237	0	0.15811	0	0	0.117571	0	0	0.00967771	0.237568	0.284534	0.266406	0.185554	0.48698
Alx4	0	0.419428	0	0	0	0	0	0	0	0.649373	0.284378	0.495799	0	0.115515	0
Ext2	0	0	0	0	0.22417	0.0592877	0	0	0	0.468454	0.352177	0.490123	0.0833333	0.295455	0
Accs	0	0	0	0	0.0655319	0.0124686	0	0	0	0.113028	0.00658298	0.324156	0.0562082	0	0
Gm13889	0	0	0	0	0.174149	0	0	0	0	0.790112	0.610435	0.391686	0	0.479916	0
Alkbh3	0	0	0	0	0.19664	0	0	0	0	0.123276	0.292247	0.214285	0	0.18488	0
Hsd17b12	0	0.136955	0	0	0.234912	0	0.0377261	0	0	0.161247	0	0.355684	0.135912	0	0
Ttc17	0	0	0	0	0	0.0252226	0	0	0	0.105704	0.0758573	0.0973857	0	0	0
Api5	0	0.152139	0	0	0.111641	0.0451337	0.0941214	0	0.307606	0	0	0	0.0602197	0	0
Lrrc4c	0	0.742814	0.00902406	0	0.0034064	0.861971	0	0	0	0	0	0	0	0	0
Gm10800	0	0	0.565463	0.268063	0	0	0	0	0	0	0	0	0	0	0.44406
B230118H07Rik	0	0	0	0	0.349989	0.596362	0	0	0	0	0	0.0126168	0	0.334842	0
Traf6	0.01202	0.115902	0	0	0	0	0.335089	0.33337	0.402339	0	0	0	0.532229	0	0.102449
Prr5l	0	0	0	0	0	0	0	0	0	0.711188	0.551493	0.516684	0	0.542065	0
Commd9	0	0	0	0	0.212232	0	0	0	0.242183	0	0	0.397351	0.00296084	0.00668373	0
Ldlrad3	0	0.352509	0	0	0.072617	0	0	0.0579992	0	0	0.0299679	0.0914109	0	0.568189	0
Trim44	0	0.0859709	0	0	0.243807	0.221518	0	0	0	0.164267	0.111228	0.191703	0	0.182345	0
Fjx1	0	0.495378	0	0	0.420053	0.0591189	0	0	0	0	0	0	0.404021	0	0
Pamr1	0	0	0	0	0.551309	0.327136	0	0	0	0.00576767	0	0	0.721934	0	0
Slc1a2	0	0	0	0	0	0.218257	0.800509	0	0	0	0.432077	0	0	0	0
Cd44	0	0.193798	0	0.256971	0	0	0.401919	0.417789	0.216659	0	0	0	0.216046	0.386438	0.0461055
Pdhx	0	0.117622	0	0	0.0992766	0.231056	0	0	0	0	0	0.0930183	0.287819	0	0
Apip	0	0	0	0	0.225474	0.519636	0	0	0	0.039296	0	0.165151	0	0.0812476	0
Ehf	0	0	0	0	0	0	0.642034	0	0	0.0106824	0	0.73506	0	0	0
Elf5	0	0	0	0	0	0	0	0	0	0.904996	0.00593233	0.112912	0	0.626763	0
Cat	0	0	0	0	0	0.438227	0.229642	0.688551	0.468666	0	0	0	0.109838	0	0
Abtb2	0.0353923	0	0	0.0921757	0	0	0.424269	0	0	0.164454	0.0803735	0	0	0.531535	0
Nat10	0	0	0	0	0.205248	0.0505307	0	0	0.0855378	0	0	0	0.0425979	0	0
Caprin1	0	0.179299	0	0	0.296345	0.237369	0	0	0	0	0	0.015414	0	0	0
Lmo2	0.555229	0.0310672	0	0.224799	0	0	0.581587	0.813598	0.599803	0	0	0	0.431798	0	0
Fbxo3	0	0.0793413	0	0	0.210306	0.185184	0	0	0	0	0	0	0	0.0983536	0
Cd59b	0	0	0	0	0.378029	0.29279	0	0	0	0.329255	0	0.315855	0	0.294948	0
Cd59a	0.14519	0.0781009	0	0	0	0	0	0	0	0.65099	0.117432	0.56436	0	0.629568	0
A930018P22Rik	0.577877	0	0	0	0	0	0	0	0	0.447644	0.0845836	0.217124	0.0224143	0.357669	0
D430041D05Rik	0	0	0	0	0.587382	0.443488	0	0	0	0.136518	0	0.632513	0	0	0.056713
Hipk3	0	0	0	0	0.0407872	0.516789	0	0	0	0.00706698	0	0	0	0.0617653	0
Cstf3	0	0	0	0	0.0925106	0.123756	0	0	0	0	0	0.152444	0	0.214784	0.130132
Tcp11l1	0	0.0105646	0	0	0.217194	0.111105	0.101452	0.336617	0.0397668	0	0	0	0	0	0
Depdc7	0	0	0	0	0	0	0.512097	0.666831	0.758393	0	0	0	0.507243	0	0
Qser1	0	0	0	0	0.296743	0.302496	0	0	0	0.297407	0.435235	0.122395	0	0	0
Prrg4	0.703133	0.54082	0	0	0	0	0.176028	0.0654684	0	0	0	0	0.236187	0	0.565833
Ccdc73	0	0	0	0	0.00576596	0.233886	0	0	0	0.112124	0.114297	0.155614	0	0.085862	0
Eif3m	0.179299	0.15509	0	0	0.307908	0.158073	0	0	0	0.115232	0.100777	0.144302	0.034766	0	0.0920102
Wt1	0	0.101811	0	0	0.712122	0	0	0	0	0.0657859	0	0	0	0	0.17029
Rcn1	0	0	0.0934107	0	0.4427	0	0	0	0	0.548964	0.598995	0.649104	0	0.325868	0
Pax6	0	0.404442	0.0878578	0	0.174226	0.227634	0	0	0	0	0	0.274028	0	0	0
Elp4	0	0.0797925	0	0	0.419333	0.486845	0	0	0	0	0	0	0	0	0
Immp1l	0	0	0	0	0.207634	0.229217	0	0	0	0.387517	0.187616	0.391767	0	0.465163	0
Dnajc24	0	0	0	0	0.243669	0.410592	0	0	0	0	0	0.0963848	0	0.0282992	0
Mpped2	0	0	0	0	0.287514	0.769407	0	0	0	0	0	0	0	0.470893	0.0481771
Arl14ep	0	0	0	0	0.185096	0.227432	0	0	0	0	0	0.0345748	0	0.0114714	0.304059
Mettl15	0	0.0834552	0	0	0.375878	0.234187	0	0	0	0	0	0.0148004	0	0	0
Kif18a	0	0.0131309	0	0.559835	0.326143	0	0	0	0	0	0	0	0.0470013	0	0.42566
Bdnf	0	0.816031	0	0	0.746082	0.267748	0	0	0	0	0	0	0	0	0
Lin7c	0	0.219742	0	0	0.179706	0.0301733	0	0	0	0	0	0	0.0446514	0	0
Lgr4	0	0	0	0	0	0	0	0	0	0.600818	0.616752	0.563945	0	0.610455	0
Ccdc34	0	0	0	0.140611	0.52646	0.222532	0	0	0	0	0.0810057	0	0.056256	0	0
Fibin	0	0	0	0	0	0	0	0	0	0.654889	0.942499	0.63644	0	0.603527	0
Ano3	0	0	0	0	0.712095	0	0	0	0	0.096206	0.0473337	0.678243	0	0	0
Lpcat4	0	0.118628	0	0.497476	0.198426	0.116184	0	0.0628038	0	0	0	0	0.236297	0	0.28123
Nop10	0	0	0	0	0.278713	0.291431	0	0	0	0.166819	0	0.295053	0.136533	0.0183921	0
Slc12a6	0.0507513	0	0	0.313541	0	0.0140094	0	0.181436	0.185401	0	0	0.0707873	0.0120344	0	0
Emc4	0	0	0	0	0.242658	0.181437	0	0	0	0.291716	0.122697	0.383516	0.118816	0.286807	0
Katnbl1	0	0.303233	0	0	0.100681	0	0.372277	0.149366	0.413019	0	0	0	0.313094	0	0
Emc7	0	0	0	0	0.179341	0.0519336	0	0	0	0.269417	0.264506	0.332555	0.0191977	0.189752	0
Aven	0	0.106587	0	0	0.129957	0	0	0	0	0.263454	0	0.175097	0.0179561	0	0.085997
Ryr3	0	0.0523067	0	0	0	0.0905615	0	0	0	0.0523152	0	0	0	0.00872093	0.777163
Fmn1	0	0	0	0	0	0	0.11212	0.564967	0.578437	0.0898836	0	0.0536213	0.456005	0	0
Grem1	0	0	0.209156	0	0.670197	0.895177	0	0	0	0	0	0	0	0	0
Scg5	0	0	0	0	0.0377021	0	0	0	0	0	0.0929271	0	0	0	0.673984
Arhgap11a	0	0	0	0.539361	0.28613	0	0.111746	0.00860566	0.00159574	0	0	0	0.518545	0	0.155148
Aqr	0	0.075278	0	0	0.116574	0.00154074	0.0282946	0	0.212061	0	0	0	0.193989	0	0.073742
Zfp770	0	0	0	0	0.140787	0.139561	0	0	0	0	0.0749388	0.0789154	0	0	0
Dph6	0	0.0892216	0	0	0.370494	0.0945424	0	0	0	0	0.0175674	0.285154	0	0	0
3110099E03Rik	0	0	0	0	0.199588	0.695463	0	0	0	0	0.450518	0	0	0	0
BC052040	0	0	0	0.0598205	0.313269	0	0	0	0	0	0.122441	0	0	0	0
Meis2	0	0	0.165967	0	0.720469	0.767105	0	0	0	0	0.188408	0.0699168	0	0	0
2700033N17Rik	0	0	0	0	0.348625	0.49068	0	0	0	0	0.0831703	0.0602259	0	0.10061	0
G630016G05Rik	0	0	0	0	0.604482	0.593705	0	0	0	0.151897	0	0.13371	0	0	0
D330050G23Rik	0	0	0	0	0.335572	0.0187316	0	0	0	0	0	0.527015	0.0508401	0	0
Gm29340	0	0	0	0	0	0	0.162506	0.505764	0	0	0	0.0634174	0.5534	0	0
Spred1	0	0	0	0	0.0275745	0	0.332606	0.478343	0	0.0152143	0	0	0.281961	0	0
Fam98b	0	0	0	0	0.255997	0.116032	0	0	0	0	0	0.0707267	0	0	0
Rasgrp1	0.344022	0	0	0	0	0	0.879766	0	0	0	0	0	0.397996	0	0.708217
Thbs1	0	0	0.316458	0.341188	0.27986	0	0	0	0	0.379636	0.311381	0.434594	0	0	0
Fsip1	0	0	0	0	0.485453	0.680007	0	0	0	0.368814	0	0.0708086	0	0	0
Gpr176	0	0	0.11846	0	0.91015	0.731353	0	0	0	0	0	0	0	0	0
Eif2ak4	0	0	0	0	0.139319	0.0812811	0	0	0	0.184499	0.0779241	0	0.0779205	0	0
Srp14	0.152922	0	0	0	0.184171	0.188605	0	0	0	0.204897	0.16185	0.248807	0.0201051	0.20895	0
Bmf	0.588371	0.00607357	0	0	0	0.236103	0	0	0	0.366532	0.142414	0	0.408585	0.287183	0
Bub1b	0.281946	0	0	0.363611	0.388885	0	0.0706583	0	0	0	0	0	0.562278	0	0.298809
Pak6	0	0	0	0	0	0	0	0	0	0.560146	0.381626	0.059778	0	0	0.597664
Ankrd63	0	0	0	0.858602	0	0	0	0	0	0	0	0	0.196482	0	0.439579
Plcb2	0	0	0	0.793292	0	0	0.441559	0.35807	0.324728	0	0	0	0.659105	0	0.190345
Inafm2	0	0	0	0	0	0	0	0	0	0.651176	0.619898	0.523365	0	0.761995	0
A430105I19Rik	0	0.568325	0	0	0.34936	0	0	0	0	0.447814	0	0.154765	0	0.366176	0
Phgr1	0	0	0	0	0	0	0	0	0	0.529469	0.680482	0.51832	0	0.504508	0
Disp2	0	0.892435	0	0	0	0	0	0	0	0.0857433	0.149839	0.121649	0	0.192058	0
Knstrn	0	0	0	0.432754	0.523687	0	0.0250646	0	0	0	0	0	0.528646	0	0.321059
Ivd	0	0	0	0	0.277615	0.574914	0	0	0	0	0	0	0.010936	0	0
Bahd1	0	0.203502	0	0	0.127723	0.0421137	0.0127907	0	0.510308	0	0	0	0.0439351	0	0
Chst14	0	0	0	0	0.51856	0.347508	0	0	0	0.00149051	0	0.277468	0	0	0
Ccdc32	0	0.0920017	0	0	0.362939	0.384842	0	0	0	0	0	0	0	0	0
Rpusd2	0.181545	0.222387	0	0	0.115702	0	0	0	0.0853423	0	0	0	0	0	0
Knl1	0	0	0	0.782482	0.370462	0	0	0	0	0	0	0	0.266963	0	0.469496
Rad51	0	0	0	0.576411	0.546639	0	0	0	0	0	0	0	0.158112	0	0.436242
Rmdn3	0	0	0	0	0.10634	0	0	0	0	0.140995	0	0.257314	0	0.343168	0
Gchfr	0	0	0	0	0	0	0	0	0	0.495011	0.153504	0.598499	0	0.919263	0
Dnajc17	0	0.280547	0	0	0.161915	0.0620007	0	0	0	0	0	0.22115	0.0678128	0.197987	0
Gm14137	0	0.18363	0	0	0	0	0	0	0	0.64712	0.0805649	0.286146	0	0.944014	0
Zfyve19	0	0.0443114	0	0	0.145702	0.0780073	0	0	0.0327184	0	0.00918555	0.019926	0	0	0
Spint1	0.712147	0	0	0	0	0	0.805964	0.095207	0	0	0	0	0.249595	0	0
Rhov	0	0	0	0.565311	0	0	0.533662	0.447265	0.963571	0	0	0	0.396315	0	0
Vps18	0	0	0	0	0	0	0.448475	0.628394	0.790797	0	0	0	0.447295	0	0
Dll4	0	0.914279	0.217101	0	0	0	0	0	0.0046192	0	0	0	0.0627602	0	0
Chac1	0.509341	0	0	0	0	0	0	0	0	0.0754212	0.698373	0.5233	0	0.28232	0
Ino80	0	0	0	0	0.17845	0.139993	0	0	0	0.191688	0	0	0.0159026	0	0
Exd1	0	0	0	0	0.025441	0.726908	0	0	0	0.361602	0	0.0326992	0	0	0
Chp1	0	0	0	0	0.139174	0.384986	0.0199612	0	0	0.0778268	0	0	0.27018	0	0
1700020I14Rik	0	0.13024	0	0	0.198875	0.337139	0	0	0	0.116775	0.269006	0.134095	0	0.348465	0
Oip5	0	0	0	0.540384	0.518694	0	0	0	0	0	0	0	0.147777	0	0.276756
Nusap1	0	0	0	0.753021	0.380972	0	0.0629767	0	0	0	0	0	0.331859	0	0.504702
Ndufaf1	0	0	0	0	0.22057	0.334498	0	0	0	0	0	0.116764	0	0.0509101	0
Rtf1	0	0.143541	0	0	0.166508	0.24544	0	0	0.0390071	0.0682841	0	0	0.107736	0	0.123034
Itpka	0	0	0	0	0	0.649516	0.333325	0	0	0	0	0	0	0.0108159	0
Rpap1	0	0	0	0	0.131809	0.0132675	0	0	0	0	0	0.125318	0	0	0
Tyro3	0	0	0	0	0.338087	0	0	0	0	0.362984	0.295467	0.352746	0	0.57163	0
Mga	0	0	0	0	0.186658	0.180056	0	0	0.207895	0	0.033683	0	0	0	0
Mapkbp1	0	0.0826859	0	0	0.124869	0.336291	0	0	0	0	0.108893	0.0992135	0	0.11578	0
Jmjd7	0	0	0	0	0.349724	0.182076	0	0	0	0	0.149604	0.116369	0	0	0
Ehd4	0.117529	0.152566	0	0	0	0	0.2781	0.716984	0.211575	0.205627	0	0	0.323053	0	0
Vps39	0	0.0225834	0	0	0.0119149	0	0	0	0.0349291	0	0.120713	0	0.55818	0	0
Tmem87a	0	0.071343	0	0	0.0285745	0.0190881	0	0	0	0	0	0.122741	0.0506208	0.0635895	0.000468415
Ganc	0	0	0	0	0.0648085	0.515018	0	0	0	0	0	0	0.0514327	0	0
Capn3	0	0.585961	0	0	0	0	0	0.120003	0	0.288007	0.0205527	0	0	0.0684461	0.395241
Zfp106	0	0	0	0	0.0876923	0	0	0	0	0.271692	0.334553	0.250996	0.130516	0.107461	0
Snap23	0	0	0	0.0531518	0.0231489	0.0322674	0.231513	0.0497951	0.134559	0	0	0	0.191909	0	0
Lrrc57	0	0.100684	0	0	0.127596	0.140597	0	0	0	0	0	0	0	0.256695	0
Haus2	0	0	0	0.170453	0.0814681	0	0	0	0	0	0	0	0	0	0
Stard9	0	0	0	0	0	0	0.150025	0.600038	0.703536	0	0	0	0.494659	0	0
Cdan1	0	0.143927	0	0	0.0420851	0.0616012	0	0	0.206373	0.093913	0	0	0	0	0.00153908
Ttbk2	0	0	0	0	0.18653	0.421233	0	0	0	0	0	0.0644486	0	0	0
Ubr1	0	0	0	0	0.0255319	0.578078	0	0	0	0.310057	0	0.132068	0	0	0
Tmem62	0.264977	0.098858	0	0	0	0.179674	0	0	0	0.084212	0	0.269854	0	0	0
Ccndbp1	0	0.0341745	0	0	0.0161702	0	0	0	0	0.035605	0.00991274	0.0588681	0	0.226626	0
Lcmt2	0	0	0	0	0.0565532	0.0546108	0	0	0.135813	0	0	0.159954	0	0.135309	0
Adal	0	0	0	0	0.0899362	0.0976297	0	0	0	0	0	0.239648	0	0.197827	0
Zscan29	0.0183639	0	0	0.51851	0	0.130107	0	0	0	0	0	0	0	0	0
Tubgcp4	0	0	0	0	0.156702	0.0359222	0	0	0	0	0	0.0595354	0.0104107	0	0
Trp53bp1	0	0	0	0	0.260809	0.0451983	0	0	0	0	0.122501	0.116219	0	0	0
Map1a	0	0	0	0	0.496252	0.282802	0	0	0	0.133347	0.0864114	0.863464	0	0.0680894	0
Ppip5k1	0	0	0	0	0	0	0	0	0	0.504673	0.166702	0.292761	0.17048	0.56517	0
Ckmt1	0	0	0	0	0.186149	0.012811	0	0	0	0	0	0.0574427	0.782839	0	0.0135738
Catsper2	0.0248227	0	0	0	0.0821702	0.24549	0	0	0	0.0305443	0.109882	0.0471916	0	0	0
Pdia3	0.186144	0	0	0	0.219655	0.112089	0	0	0	0.234444	0.281367	0.288922	0	0.187998	0
Serinc4	0	0.194078	0	0	0.0202979	0.0888781	0	0	0	0.0649066	0	0	0.155092	0.109567	0
Serf2	0.101503	0	0.282897	0.182532	0.235583	0.118823	0	0.0844986	0	0.2306	0.232334	0.241843	0	0.224498	0
Hypk	0	0	0	0	0.207043	0	0	0	0	0.411624	0.198001	0.534958	0	0.432307	0
Mfap1b	0	0.00585971	0	0	0.104383	0.0977003	0	0	0	0	0	0.0247179	0.0158071	0	0
Mfap1a	0	0	0	0.0354098	0.114723	0.22092	0	0	0	0	0	0	0	0	0.174082
Wdr76	0	0	0	0.647743	0.193191	0	0	0	0	0	0	0	0	0	0.47365
Frmd5	0	0	0	0	0	0	0	0	0	0	0.696766	0	0	0	0.439639
Casc4	0	0	0	0	0.208451	0.0759546	0	0	0	0.37823	0.0966427	0.857154	0	0.127139	0
Mageb3	0	0	0	0	0.0395842	0.0881016	0	0	0	0.670058	0.166771	0.417923	0	0.0752758	0
Ctdspl2	0	0	0	0	0.135816	0.0385019	0	0	0	0.0514139	0.348102	0	0	0.0582575	0
Eif3j1	0	0.0435843	0	0	0.207907	0.0477232	0	0	0	0.276717	0	0.128577	0.138825	0	0
Spg11	0	0	0	0.110799	0.012617	0	0	0	0.030804	0.227223	0.0102572	0.20597	0	0.0230404	0
B2m	0.231553	0	0.287628	0	0.228834	0.192861	0.203876	0.138862	0	0.23339	0.235248	0.23453	0	0.185912	0.188571
Trim69	0	0	0	0	0.138878	0.0976743	0	0	0	0.52445	0.33655	0.261981	0	0	0
Terb2	0	0	0	0	0.265186	0.380359	0	0	0	0.142662	0.307179	0.262635	0	0	0
Sord	0	0	0	0	0	0.236819	0.50172	0.303513	0.189289	0	0	0	0.365923	0	0
Duox2	0	0	0	0	0.0862475	0	0	0	0	0.638754	0.67749	0.66812	0	0	0
Duoxa1	0	0.0125755	0	0	0.472102	0	0	0	0	0.632546	0.314078	0.510123	0	0	0
Duox1	0	0	0	0	0	0	0	0	0	0.794702	0	0.727649	0	0	0
Shf	0	0	0	0	0.227476	0.0109145	0	0	0	0.595308	0.395911	0.634653	0	0.397974	0
Slc28a2	0	0	0	0.435698	0	0	0.61083	0.489795	0.909534	0	0	0	0	0	0.0130641
Gm14085	0	0	0	0.350315	0	0	0.631386	0.488216	0.897045	0	0	0	0	0	0
Gatm	0	0.554165	0	0.363346	0	0	0.695014	0.8843	0.287302	0	0	0	0	0	0
AA467197	0.204872	0.445844	0	0.897278	0	0	0.303883	0	0.075285	0	0	0	0	0	0.607233
Slc30a4	0	0.281995	0.0425716	0	0.551134	0	0	0	0	0.481162	0.0740953	0.503593	0	0	0
Bloc1s6os	0.00731383	0	0	0.0373878	0.0141064	0.0857396	0	0	0	0	0	0	0	0	0.266999
Bloc1s6	0	0	0	0	0.198456	0	0	0	0	0	0	0.0425209	0	0.0155954	0
Sqor	0	0	0	0.553013	0.0875319	0.577235	0.099677	0.0757824	0.0345745	0	0	0	0	0	0
Sema6d	0	0.200682	0	0	0	0.530932	0	0	0	0.549479	0.534506	0	0	0.558567	0
Slc24a5	0	0.36741	0.122902	0	0.204128	0.122803	0	0	0	0	0	0.000454931	0.0469842	0	0
Myef2	0	0.366757	0	0	0.228461	0.141021	0	0	0	0	0	0.0833434	0	0	0
Slc12a1	0	0	0.41318	0	0.743119	0.325018	0	0	0	0	0	0	0	0	0
Gm14002	0	0	0.371012	0	0.809079	0.42538	0	0	0	0	0	0	0	0	0
Dut	0	0	0	0.318648	0.54172	0.0600954	0	0	0	0	0	0	0.0614613	0	0.335225
Fbn1	0	0	0.192498	0	0.869941	0.823239	0	0	0	0	0	0	0	0	0
Gm9913	0	0	0	0	0.649084	0.636431	0	0	0	0.559319	0.0340631	0.0957194	0	0	0
Cep152	0	0	0	0.063987	0.160149	0	0	0	0.0262792	0	0	0	0	0	0.0771556
Shc4	0	0.653262	0	0	0.0237234	0	0	0	0	0	0.300974	0	0	0	0
Eid1	0	0.16805	0	0	0.29309	0.264354	0	0	0	0.0896201	0.397631	0.196798	0	0.116705	0
Secisbp2l	0	0.250354	0	0	0.00974468	0.31434	0.0643411	0	0	0.211042	0	0	0	0	0
Cops2	0	0.179641	0	0	0.395489	0.120591	0	0	0	0	0.22144	0.092031	0	0	0
Galk2	0	0	0	0	0.315269	0	0	0	0	0	0.0760408	0.0100388	0.0385387	0	0
Fam227b	0	0	0.371942	0	0	0	0	0	0	0.640761	0.346955	0.576367	0	0	0
Fgf7	0	0	0.199778	0	0.762788	0.581929	0	0	0	0.166159	0.425587	0.083591	0	0	0
Dtwd1	0.0774936	0	0	0	0.567279	0.0655102	0	0	0	0	0	0	0	0	0
Atp8b4	0	0	0	0.460052	0	0	0.481509	0.843182	0.821852	0	0	0	0	0	0.0788276
Hdc	0	0	0	0.878427	0	0	0	0	0	0	0	0	0	0	0.695715
Gabpb1	0.263354	0.110009	0	0.0401637	0.0238936	0	0.0334625	0	0	0.197935	0.143764	0	0	0.247085	0.318449
Gm27003	0.278008	0	0	0	0.00189362	0.0667941	0	0	0	0.0585703	0	0.0494359	0.125606	0.10296	0
Usp8	0	0	0	0	0.0262553	0.0653656	0.0729974	0.000818331	0.0831888	0.00945265	0	0	0.158405	0	0
Usp50	0	0	0	0	0.297628	0	0	0	0	0.411411	0	0.46663	0	0.369887	0
Trpm7	0	0	0	0	0.0454516	0.213258	0	0	0	0.262651	0.141787	0	0	0.269427	0
Sppl2a	0	0	0	0	0	0	0.200414	0	0	0.396037	0.289299	0.4419	0	0.393388	0
Ap4e1	0	0	0	0	0.101596	0.0916457	0	0	0	0	0.0889467	0	0	0	0
Blvra	0	0	0	0	0.0215532	0.0560555	0.326908	0.646248	0.437944	0	0	0	0.576219	0	0
Ncaph	0	0	0	0.4957	0.45897	0	0	0	0	0	0	0	0.466841	0	0.338381
Itpripl1	0	0	0	0	0.203809	0.4574	0	0.0751841	0.216398	0	0	0	0	0	0.154966
1810024B03Rik	0	0	0	0	0.127213	0.0406585	0	0	0	0.326298	0	0.129413	0	0.14936	0
Snrnp200	0	0.00243798	0	0	0.0980306	0	0	0	0.0353723	0	0	0.0145578	0.0553486	0	0
Ciao1	0	0.0727117	0	0	0.201272	0.260599	0	0	0	0	0	0.135249	0.0385864	0.0457433	0
Tmem127	0	0.0954662	0	0	0.100021	0.309345	0	0	0	0	0	0	0.265865	0	0
Stard7	0	0	0	0	0.0630213	0	0	0	0	0	0	0.146705	0.418257	0.060201	0
Dusp2	0.112585	0	0	0.229898	0	0	0.499841	0.799614	0	0	0	0	0.295889	0	0.499045
Gpat2	0.072141	0	0	0	0.0884548	0	0.0127351	0	0	0	0.205049	0.218278	0.0995075	0	0
Fahd2a	0.0283029	0	0	0	0.0125319	0.180351	0	0	0	0.357377	0	0.208688	0	0.409456	0
Kcnip3	0	0	0.149556	0	0.648114	0.889658	0	0	0	0	0	0	0	0	0
Zfp661	0	0	0	0	0.283798	0.282254	0	0	0.139349	0	0.0826027	0.252771	0	0	0
Mrps5	0	0.151155	0	0	0.325921	0.243978	0	0	0	0.0539251	0	0.101308	0.155396	0	0
Mal	0	0.963741	0.145053	0	0	0.459777	0	0	0	0	0	0	0	0	0
Mall	0	0.894782	0	0	0	0	0.0988205	0	0	0.17502	0	0	0.0144893	0.373725	0.0775407
Nphp1	0	0.209654	0	0	0.277842	0.0266206	0	0	0	0.235189	0.158795	0	0	0.35791	0
1500011K16Rik	0	0.104491	0	0	0.107604	0.0632268	0	0	0	0	0	0.101814	0.271845	0.0610542	0
Bub1	0	0	0	0.417763	0.597759	0	0.00271318	0	0	0	0	0	0.57069	0	0.291563
Acoxl	0.510752	0	0	0.267406	0	0	0.459846	0.109041	0.149842	0.051381	0	0	0	0	0.0415582
Bcl2l11	0.104758	0	0	0.106045	0	0	0.457249	0.546983	0.344062	0.440625	0	0	0.176982	0.289985	0.10265
Gm14005	0	0.0736527	0	0.261015	0	0	0.324437	0.0762036	0	0.625045	0	0	0.142759	0.433099	0.0683217
Gm14010	0	0	0	0.251158	0	0	0	0	0	0.359599	0	0	0.0180115	0.291426	0.476847
Gm29010	0	0	0	0	0	0	0	0	0	0.852154	0.28978	0.339336	0	0.618646	0
Gm39929	0.150406	0	0.291956	0	0.0191064	0.280003	0	0	0	0	0	0	0	0	0.185345
Anapc1	0	0	0	0	0.234493	0.0585019	0	0	0	0.134503	0.0965103	0.207672	0	0.044416	0
Mertk	0	0	0	0	0	0	0.4401	0.625338	0.456608	0.334407	0.147321	0	0	0.374126	0
Tmem87b	0	0	0	0	0.0120426	0.300821	0	0	0.0247128	0.326453	0.0782698	0.0123438	0	0	0
Fbln7	0	0	0	0	0	0	0	0	0	0.0877742	0	0	0	0.950736	0
Zc3h8	0	0	0	0	0.211574	0.0779502	0	0	0.807824	0	0	0	0.436936	0	0
Gm10762	0.00984975	0	0	0	0	0.104143	0	0	0	0.317845	0	0.097143	0	0.322708	0
Zc3h6	0	0	0	0	0.134106	0.28622	0	0	0	0	0.181359	0	0	0.0131696	0
Ttl	0	0	0	0	0.144809	0.102926	0	0.0153437	0.390694	0	0	0	0	0.0632185	0
Polr1b	0	0	0	0	0.323201	0	0	0	0.149372	0	0	0.0935339	0	0	0
Chchd5	0	0	0	0	0.38751	0	0	0	0	0	0.464982	0.0397307	0	0	0
AI847159	0	0.0657895	0	0	0.0113191	0	0	0	0	0.175751	0	0	0.207527	0	0.743653
Gm14029	0.00618612	0	0	0	0	0	0	0	0	0.00617384	0	0	0.0319404	0	0.800777
Slc20a1	0	0	0	0	0.0203617	0	0	0	0	0.562944	0.0591848	0.251032	0	0.417748	0
A730036I17Rik	0	0	0	0	0	0	0	0	0	0.634208	0.565098	0.455058	0	0.504244	0
Ckap2l	0	0	0	0.696935	0.52898	0	0.28187	0	0	0	0	0	0.238707	0	0.320398
Il1a	0	0	0	0	0	0	0.934597	0.673548	0.802443	0	0	0	0	0	0
Il1b	0	0	0	0.375992	0	0	0.816543	0.481616	0.886667	0	0	0	0	0	0.309516
Sirpa	0	0	0	0.1083	0	0	0.605225	0.875668	0.788371	0	0	0	0.479814	0	0
Stk35	0	0	0	0	0.0548723	0.0352659	0	0	0.0455099	0.25129	0	0.0656314	0	0.0741232	0
Snrpb	0	0.0961078	0	0	0.207245	0.180094	0	0.075217	0.176152	0.108435	0	0.123987	0.179943	0.0508153	0
Nop56	0	0.148845	0	0	0.43627	0	0	0	0	0.130706	0	0.317367	0	0	0
Idh3b	0	0	0	0	0.328915	0.109551	0	0	0.010195	0	0	0	0.370157	0	0
Ebf4	0.0350177	0.289381	0	0	0.333101	0	0	0	0	0.26692	0.308761	0	0	0.326813	0
Cpxm1	0	0	0.107848	0	0.819051	0.720106	0	0	0	0	0.0353474	0.141795	0	0	0
Pced1a	0	0	0	0	0.154307	0.111712	0	0	0	0	0	0.279664	0	0	0
Vps16	0	0	0	0	0.110894	0	0	0	0.21091	0	0.0537737	0.0415504	0.0509551	0	0
Ptpra	0	0	0	0	0.0803872	0.134961	0.111111	0.494077	0.317776	0	0	0	0.193696	0	0
Mrps26	0	0	0	0	0.310277	0.274228	0	0	0	0.0354699	0.00704225	0.272693	0.140688	0.00445582	0
Oxt	0	0	0	0	8.51064e-05	0	0	0	0	0.202513	0.00366928	0.348581	0	0.345533	0
Avp	0	0	0	0	0	0	0	0	0	0.371081	0.190455	0.904273	0	0	0
Ubox5	0	0	0	0	0.106447	0.0206003	0	0	0.387634	0	0	0	0.218711	0	0
Fastkd5	0	0	0	0	0.138851	0.0101004	0	0.025266	0.0422033	0	0	0.00736989	0	0	0
Lzts3	0.27726	0	0	0	0.109149	0.274256	0	0	0	0.0844029	0	0	0	0	0
Ddrgk1	0.297879	0	0	0	0.102551	0.0268964	0	0	0	0.149638	0.191409	0.181541	0.0543935	0.140216	0
Itpa	0	0.0188623	0	0	0.318704	0.319554	0	0	0	0	0	0.249655	0	0	0
Slc4a11	0	0.0435614	0	0	0.332187	0.116597	0	0	0	0.00582656	0.0170621	0.304148	0	0.247106	0
4930402H24Rik	0	0.542716	0	0	0.448074	0.572578	0	0	0	0	0	0	0	0	0
Atrn	0	0.31555	0	0.198444	0.0741489	0.182839	0	0	0	0.0812253	0	0.108304	0	0.169958	0
Gfra4	0	0	0	0	0.229481	0	0	0	0	0.350383	0.551007	0.847639	0	0.103949	0
Adam33	0	0	0	0	0	0	0.622412	0.72743	0.034008	0	0	0	0	0	0
Siglec1	0	0	0	0	0	0	0.894438	0.90905	0	0	0	0	0	0	0
Hspa12b	0	0.895378	0	0	0.390741	0.216906	0	0	0	0	0	0	0	0	0
1700037H04Rik	0	0	0	0	0.295698	0.238659	0	0.0393822	0.07118	0	0	0	0	0	0
Spef1	0	0.0040633	0	0	0.0331064	0	0	0.133447	0.0973721	0	0	0.170262	0.103702	0.0653277	0
Cenpb	0	0.0387938	0	0	0.118413	0	0.0729328	0.292951	0.141856	0	0	0	0.202149	0.0928138	0
Cdc25b	0	0	0	0.147549	0.223468	0	0.00678295	0	0	0	0.0889085	0	0.468887	0	0.387706
Ap5s1	0	0	0	0	0	0.138973	0.0632405	0.0780483	0	0	0	0.0996906	0.4849	0.0671481	0
Mavs	0	0	0	0	0.184455	0.0517587	0	0	0.0295858	0	0	0.29944	0	0.0503853	0
Pank2	0	0.149016	0	0	0.187772	0.202086	0	0	0	0	0.0505667	0	0.0382044	0.196249	0
Rnf24	0	0	0	0	0.0341489	0	0	0	0	0.476568	0.258021	0.420773	0	0.111503	0
Smox	0	0	0	0	0	0	0.364248	0	0	0.56496	0.47813	0.469684	0	0.603253	0
Prnp	0	0.291672	0	0.0271376	0.107771	0	0	0	0	0.41908	0.262304	0.266958	0	0.564091	0
Rassf2	0	0	0	0.386324	0	0	0.315352	0.774453	0.619274	0	0	0	0.319704	0	0
Slc23a2	0	0	0	0	0	0	0.460237	0.439217	0.100836	0.202459	0	0	0	0	0
Gm14051	0	0	0	0	0	0	0	0.406365	0.785608	0	0	0	0	0	0
Tmem230	0	0	0	0	0.0942238	0	0	0	0	0.286355	0.292686	0.345678	0	0.370755	0
Pcna	0	0	0	0.189836	0.0752979	0	0.239812	0.280433	0.235255	0	0	0	0.214064	0	0.128506
AV099323	0	0	0	0	0.0222553	0.228384	0	0	0	0	0.121912	0.0338469	0	0	0
Cds2	0	0.284098	0	0	0.0955319	0.303222	0.0244186	0	0.425085	0	0	0	0	0	0
Gpcpd1	0	0	0	0.369977	0	0	0.199191	0.00735294	0	0.381231	0.298703	0.263952	0.0241165	0.319797	0
AU019990	0	0	0	0.555013	0	0	0.0668801	0.393284	0.0864128	0.152437	0	0	0.417142	0	0
1110034G24Rik	0.00175292	0.213059	0	0	0.121787	0.0856254	0	0	0.535859	0	0	0	0	0	0
Chgb	0	0.24246	0	0	0.16047	0	0	0	0.261667	0	0.309781	0	0	0	0
Trmt6	0	0.0923867	0	0	0.280927	0.113481	0.0326873	0	0.0734314	0	0	0	0.208492	0	0.0364026
Mcm8	0	0	0	0	0.44006	0	0	0	0	0	0	0	0.0718895	0	0.0141059
Crls1	0	0	0	0	0.0894294	0	0	0	0	0.258915	0.428631	0.266547	0	0.0799678	0
Bmp2	0	0	0	0	0.175014	0	0	0	0	0.177772	0.784666	0.0752745	0	0.795696	0
Hao1	0	0.370059	0	0	0.140128	0	0	0	0.0491802	0.166596	0.0485303	0	0.151385	0	0
Tmx4	0	0.213903	0	0.472639	0	0	0	0	0.119149	0.202021	0.287781	0	0	0.196877	0.080099
Plcb1	0	0.366153	0	0	0.443273	0.882144	0	0	0	0	0	0	0	0	0
Platr3	0	0	0.323908	0	0.772285	0.481227	0	0	0	0	0	0	0	0	0
Plcb4	0	0.376039	0	0	0.468296	0.0931865	0	0	0	0.035459	0	0	0.525306	0	0.112457
Ankef1	0	0	0.209225	0	0	0.97646	0	0	0	0	0	0	0	0	0
Mkks	0	0	0	0	0.106277	0.143128	0	0	0	0	0	0.143485	0.0406877	0	0
Slx4ip	0	0	0	0	0.104553	0.177257	0.128997	0	0	0	0	0.00257794	0	0	0
Jag1	0	0.570409	0	0	0.00859574	0.443536	0	0.0490624	0.00585106	0.404278	0	0	0	0	0
Btbd3	0	0.472143	0	0	0	0	0	0	0	0.424549	0.716176	0.510253	0	0.430576	0
Sptlc3	0	0	0.449323	0	0	0.73897	0	0	0	0	0	0	0	0	0
Ism1	0	0	0	0	0.0763261	0.932914	0	0	0	0	0	0	0	0	0
Tasp1	0	0.0952096	0	0	0.24241	0.562372	0	0	0	0	0	0.0393364	0	0	0.167416
Esf1	0	0.214328	0	0	0.354575	0.248925	0	0	0	0	0.0429213	0.00731323	0	0.0402446	0
Ndufaf5	0	0.1767	0	0	0.432957	0.296276	0	0	0	0	0	0	0.481342	0	0
Macrod2	0	0	0	0	0.142562	0	0	0	0	0.166882	0.0571551	0.669431	0	0.00551684	0
Flrt3	0	0.611324	0	0	0	0	0.919744	0.0579521	0.175542	0	0	0	0	0	0
Kif16b	0.0700017	0.0661677	0	0	0.0488298	0.0879651	0.0336563	0.0456219	0.0595271	0	0	0	0.200956	0	0
Snrpb2	0	0	0	0	0.307273	0.228059	0.0976098	0	0	0	0.00928849	0	0.0208214	0	0
Otor	0	0	0.167348	0	0.234758	0.944616	0	0	0	0	0	0	0	0	0
Bfsp1	0	0	0	0	0.00859528	0	0	0	0	0.601009	0.0245841	0.772018	0	0.16765	0
Dstn	0	0.167622	0.0187562	0.318388	0.264202	0.282283	0	0	0	0.25994	0	0.197095	0.0725406	0.0120402	0
Rrbp1	0.173873	0	0.0682379	0	0.185308	0	0	0	0	0.304166	0.305599	0.352873	0	0.225398	0
Gm5535	0.301878	0	0	0	0	0	0	0	0	0.205266	0	0.671116	0.434502	0	0
Snx5	0	0	0	0	0.23287	0	0.397131	0.341531	0.35078	0	0	0	0.0655205	0	0
Mgme1	0	0	0	0	0.122766	0	0	0	0.406639	0	0.160061	0	0.052531	0	0
Ovol2	0	0	0	0	0	0	0.0620713	0	0	0.51146	0	0	0	0.277969	0.802385
Kat14	0	0	0	0	0.0671702	0.0161207	0	0	0.141497	0	0	0.131839	0.161387	0	0
Dzank1	0	0.0347082	0	0	0.215641	0.329178	0	0	0	0	0.339814	0	0	0	0
Polr3f	0	0.0360992	0	0	0.113191	0	0.0367571	0	0	0	0.0336038	0	0	0	0.167597
Rbbp9	0	0	0	0	0.239483	0.533487	0	0	0	0	0.0414864	0.168838	0	0.208826	0
Sec23b	0.158353	0	0	0	0	0	0.0636305	0	0.0641844	0.175842	0	0.337007	0	0.0759386	0
Smim26	0	0.0800684	0	0	0.11848	0.0897077	0	0	0	0.25759	0.00707525	0.294764	0.0334288	0.272167	0
Dtd1	0	0	0	0	0.505299	0.402263	0	0	0	0	0	0.0836771	0	0	0
Slc24a3	0	0	0	0	0	0.771878	0	0	0	0	0.0164506	0.14126	0	0	0
Rin2	0	0	0	0	0.0428936	0.551213	0.185306	0.558908	0.57116	0	0	0	0.298013	0	0
Naa20	0	0.135201	0	0	0.33722	0.210272	0	0	0.549597	0	0	0	0.27497	0	0
Crnkl1	0.0299666	0.0588965	0	0.150335	0.0608936	0.125237	0.0939276	0	0.0472518	0	0	0	0.0651862	0	0.164397
Cfap61	0	0	0	0	0.178071	0.595863	0.0576019	0	0.196678	0.128726	0	0	0	0	0
Ralgapa2	0	0.163578	0	0	0	0.130245	0.13237	0.379681	0.0269978	0	0.0440524	0	0	0	0
Kiz	0	0	0	0.00432037	0.0932553	0	0	0	0	0.0743467	0.102495	0	0	0.114478	0
Xrn2	0	0.152994	0	0	0.237806	0.254661	0.0352067	0	0	0.0554555	0	0	0.118863	0	0.0131156
Foxa2	0	0	0.00501337	0	0	0	0	0	0	0.314058	0	0	0	0.855205	0
Thbd	0	0	0	0	0.00695745	0.135951	0	0	0.387854	0.607206	0	0	0	0.270832	0
Cd93	0	0.337249	0	0	0	0	0.611216	0.947128	0.808666	0	0	0	0	0	0.157948
Gm14120	0	0	0	0	0.00942553	0	0	0	0	0.250266	0.0559553	0	0	0.0255285	0.585335
Nxt1	0.066611	0	0	0.134565	0.19126	0	0.00490956	0	0.0341312	0	0	0	0.166617	0	0.161961
Gzf1	0	0	0	0	0.0551064	0.311788	0	0	0	0	0.44715	0	0	0	0
Napb	0	0	0	0	0.0600638	0	0	0	0.0626523	0	0.222647	0.0369101	0	0	0
9230104L09Rik	0	0	0	0	0	0.383287	0	0	0	0.841749	0.312835	0.0925684	0	0.149785	0
Cst3	0.123623	0	0.358358	0	0.224793	0.226739	0	0.14513	0	0.245004	0.240287	0.232617	0	0.234357	0
Syndig1	0	0.826864	0	0	0.0121064	0	0	0	0	0.264703	0	0.188607	0	0	0
Zfp120	0	0	0	0	0.112957	0.133132	0.0100775	0	0.132661	0	0	0	0.252305	0	0.133069
Zfp937	0	0	0.110563	0	0.378767	0.519317	0	0	0	0	0	0.052128	0	0	0
Gm21994	0	0	0	0	0.12034	0.176273	0	0	0	0	0	0	0	0	0.587592
3300002I08Rik	0	0	0	0	0.0250213	0.225856	0	0	0	0.379175	0.000366928	0.225066	0	0.307456	0
Gm10130	0	0.433985	0	0.0201201	0	0.153532	0	0	0	0.0888708	0	0	0	0	0.473935
Zfp442	0	0.021328	0.0497285	0	0.372583	0.427308	0	0	0	0	0	0.241179	0	0	0
Cst7	0	0	0	0.664145	0	0	0.27157	0	0	0	0	0	0.33821	0	0.844239
Apmap	0.280943	0.0149701	0	0.35365	0	0.165813	0	0	0	0.0388231	0.0432103	0.0398823	0	0	0
Acss1	0.479191	0	0	0	0	0	0.428559	0.733105	0.868335	0	0	0	0	0	0
Platr15	0.0599512	0	0	0	0	0	0	0	0	0.830605	0.164035	0	0	0.53835	0
Entpd6	0	0	0	0	0.404292	0.182694	0	0	0	0	0	0.0946257	0	0	0.0189525
Pygb	0	0	0	0	0.153064	0.17715	0	0.106331	0.494656	0	0	0	0.0293696	0	0
Abhd12	0	0	0	0	0.0778047	0.137969	0.0406977	0.597213	0.27828	0	0	0	0.115521	0	0
Gins1	0	0	0	0.0332336	0.376269	0	0	0	0	0	0	0	0	0	0.0240885
Ninl	0	0.127029	0.0774926	0	0.477727	0.548674	0	0	0	0	0	0	0	0	0
Nanp	0.180056	0	0	0	0	0	0	0	0	0	0.0827848	0.254635	0.0273775	0	0
Nsfl1c	0	0.19559	0	0	0.179368	0	0	0	0.0638014	0	0	0.246427	0	0	0
Gm14167	0.172953	0	0	0	0	0.182408	0	0	0	0.280147	0	0.213602	0	0.461507	0
Fkbp1a	0	0.222241	0.0620681	0	0.297983	0.209571	0	0	0.037234	0.00211559	0.0216124	0.217488	0	0	0
Sdcbp2	0	0.75223	0	0	0	0	0.118606	0	0.395081	0	0	0	0	0	0.423978
Snph	0	0.204085	0	0	0.305088	0.251244	0	0	0.586462	0	0	0	0	0	0
Tmem74b	0	0	0	0	0.311972	0	0	0	0	0	0.903968	0	0	0.239831	0
Psmf1	0	0.0844311	0	0	0.178618	0.13285	0	0	0.0397981	0	0	0.0601419	0	0	0
Angpt4	0	0	0.198544	0	0.743682	0.839423	0	0	0	0.098645	0	0	0	0	0
Gm14154	0.202647	0	0	0.340308	0.0870851	0	0	0	0	0	0	0	0	0.331337	0
Fam110a	0.0973983	0	0	0.36285	0.191021	0	0	0	0	0	0	0	0.238989	0.0573551	0.486153
Slc52a3	0	0.390491	0	0	0	0.335694	0.747881	0	0	0	0	0	0	0	0.296
Srxn1	0	0	0	0	0	0	0.525044	0.43658	0.450136	0.335592	0	0	0.0733524	0.182293	0
Tcf15	0	0	0.358975	0	0	0	0	0	0	0.213333	0.634613	0	0	0.227126	0.209129
Csnk2a1	0	0.112831	0	0	0.258602	0.187027	0	0	0	0.102571	0	0.13568	0	0.0642302	0
Tbc1d20	0	0	0	0.157174	0	0	0.0174419	0	0	0.270348	0.289157	0.256703	0.00988539	0.2487	0
Rbck1	0	0.0729256	0	0	0.254221	0.189029	0.00167959	0	0	0	0	0	0.10148	0	0
Trib3	0	0	0	0	0	0	0	0	0	0	0.829373	0	0.128653	0.241445	0
Sox12	0	0.180299	0.0948914	0	0.397458	0.553853	0	0	0	0	0.207592	0	0	0	0
Zcchc3	0	0	0	0	0.319756	0.421731	0	0	0	0	0	0.221732	0	0	0
6820408C15Rik	0	0.0516097	0	0	0	0	0	0	0	0	0.7217	0.131811	0	0	0
Defb25	0	0	0.260592	0	0.620464	0.48997	0	0	0	0	0.0707559	0.262097	0	0	0
Rem1	0	0	0.415679	0	0.928325	0.330268	0	0	0	0	0	0	0	0	0
H13	0.382754	0	0	0	0.211966	0	0	0	0	0.253021	0.314618	0.389558	0	0.27576	0
Mcts2	0	0.142529	0	0	0.479658	0.61958	0	0	0	0.168467	0	0.283727	0	0	0
[truncated: 16,418 more rows]
